# Supplementary material for: The shaping of cancer genomes with the regional impact of mutation processes
Source: PubMed Central journal article supplement (PMC9355972; doi:10.1038/s12276-022-00808-x), 2022-07-28
Supplement: 12276_2022_808_MOESM1_ESM.pdf [file 12276_2022_808_MOESM1_ESM.pdf]

## Supplementary figures and tables

Supplementary Fig. 1. Frequencies of mutation signatures with respect to tumor types.

Supplementary Fig. 2. The sensitivity of discovery for the lineage-specific mutation signatures.

Supplementary Fig. 3. Concordance of epigenetic and genetic features of mutation clusters.

Supplementary Fig. 4. Genomic and epigenetic correlation.

Supplementary Fig. 5. Histone marks enrichment and depletion around the mutations.

Supplementary Fig. 6. Mutation density around nucleosome positioning.

Supplementary Fig. 7. Mutation signature composition per genomic region.

Supplementary Fig. 8. Composition of mutation signatures at amino acid hotspots.

Supplementary Fig. 9. Frequency of mutation signatures in 107 recurrently mutated amino acid hotspots.

Supplementary Fig. 10. The level of evolutionary selections and clonality of mutation signatures.

Supplementary Fig. 11. Strand asymmetry related to DNA replication.

Supplementary Table 1. Tumor types.

Supplementary Table 2. Composition of mutation signatures of ICGC data.

Supplementary Table 3. MutSig results.

Supplementary Table 4. Driver mutations with high level of positive selections.

Supplementary Table 5. Evolutionarily distinct mutational processes in individual cancer genomes.

Supplementary Table 6. Kataegis events and mutation signatures.

**Supplementary Fig. 1. Frequencies of mutation signatures with respect to tumor types.** For 17 mutation signatures (SBS1 to SBS17), the mutation frequencies ( $y$ -axis) are plotted across 24 tumor types supported by more than 10 samples.

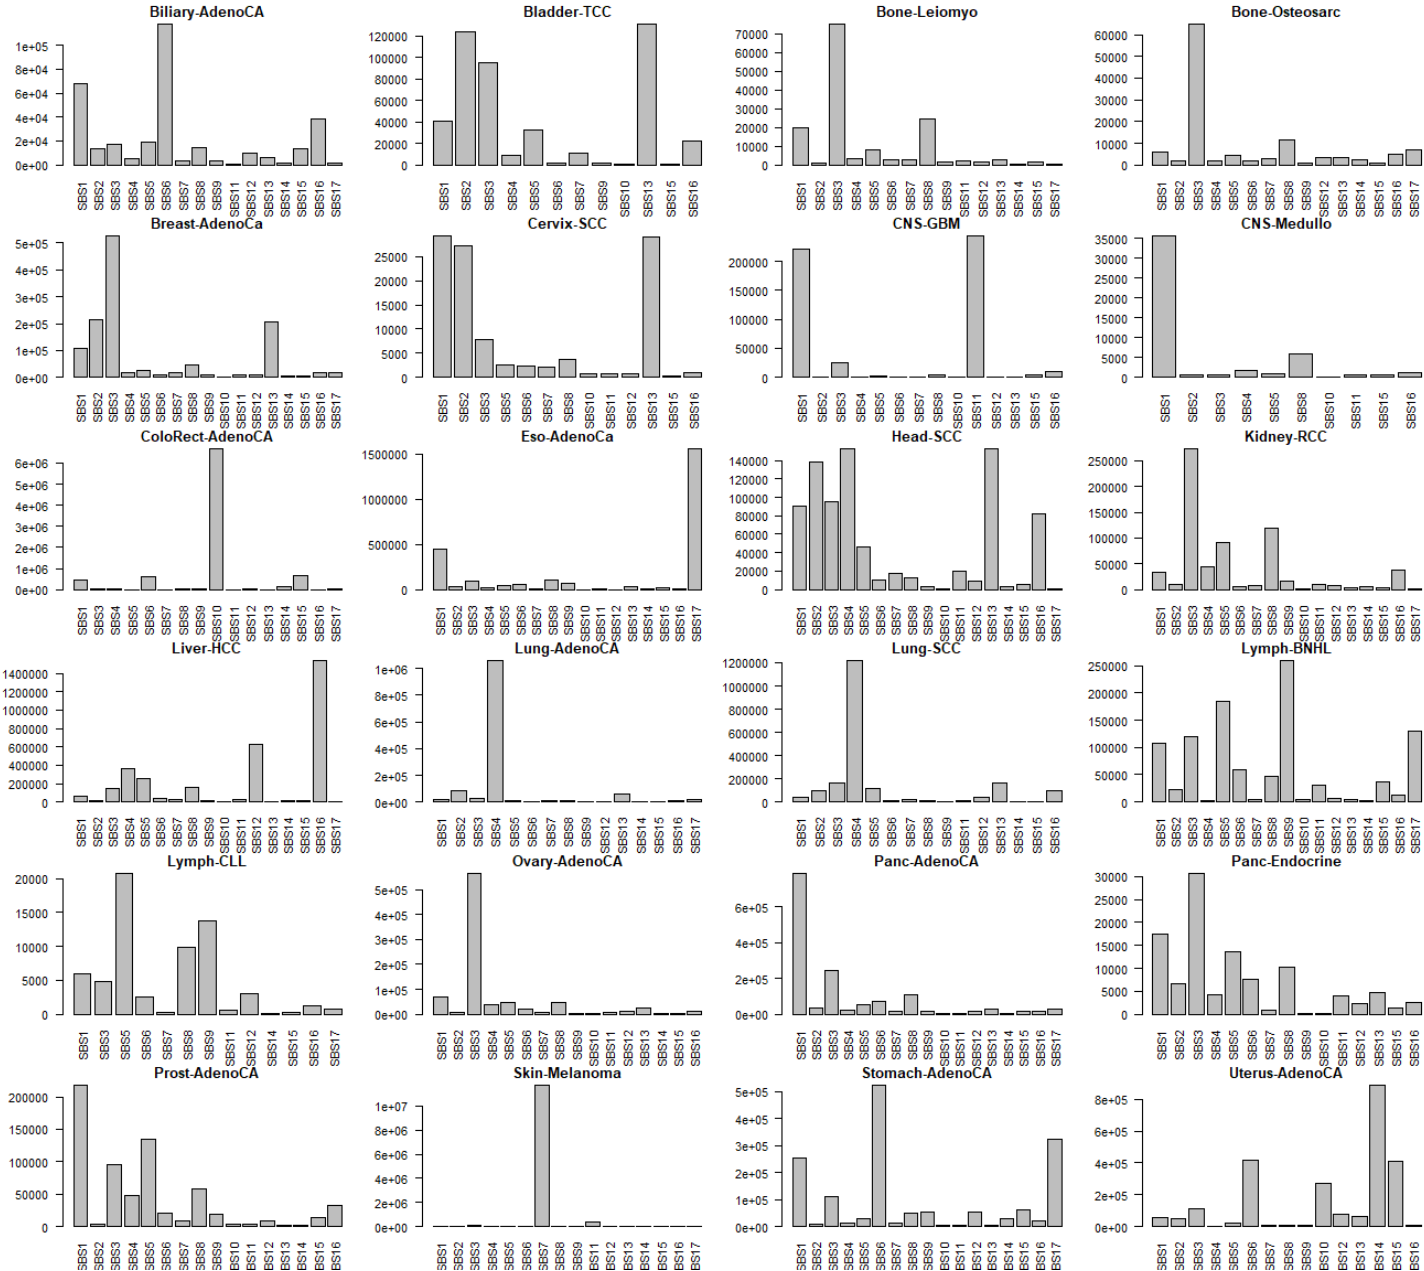

**Supplementary Fig. 2. The sensitivity of discovery for the lineage-specific mutation signatures.** For three tumor types of lung adenocarcinomas (Lung-AdenoCA), cutaneous melanomas (Skin-Melanoma) and hepatocellular carcinomas (Liver-HCC), the extent of recoveries of 17 mutation signatures are compared for sample vs. cluster (upper panels) and segment vs. cluster scales (lower panels). Both comparison reveals that the lineage-specific mutation signatures such as SBS4 (lung cancers), SBS7 (melanomas) and SBS16 (liver cancers) are more discovered in mutation cluster-based assignments than those based on sample- or segments.

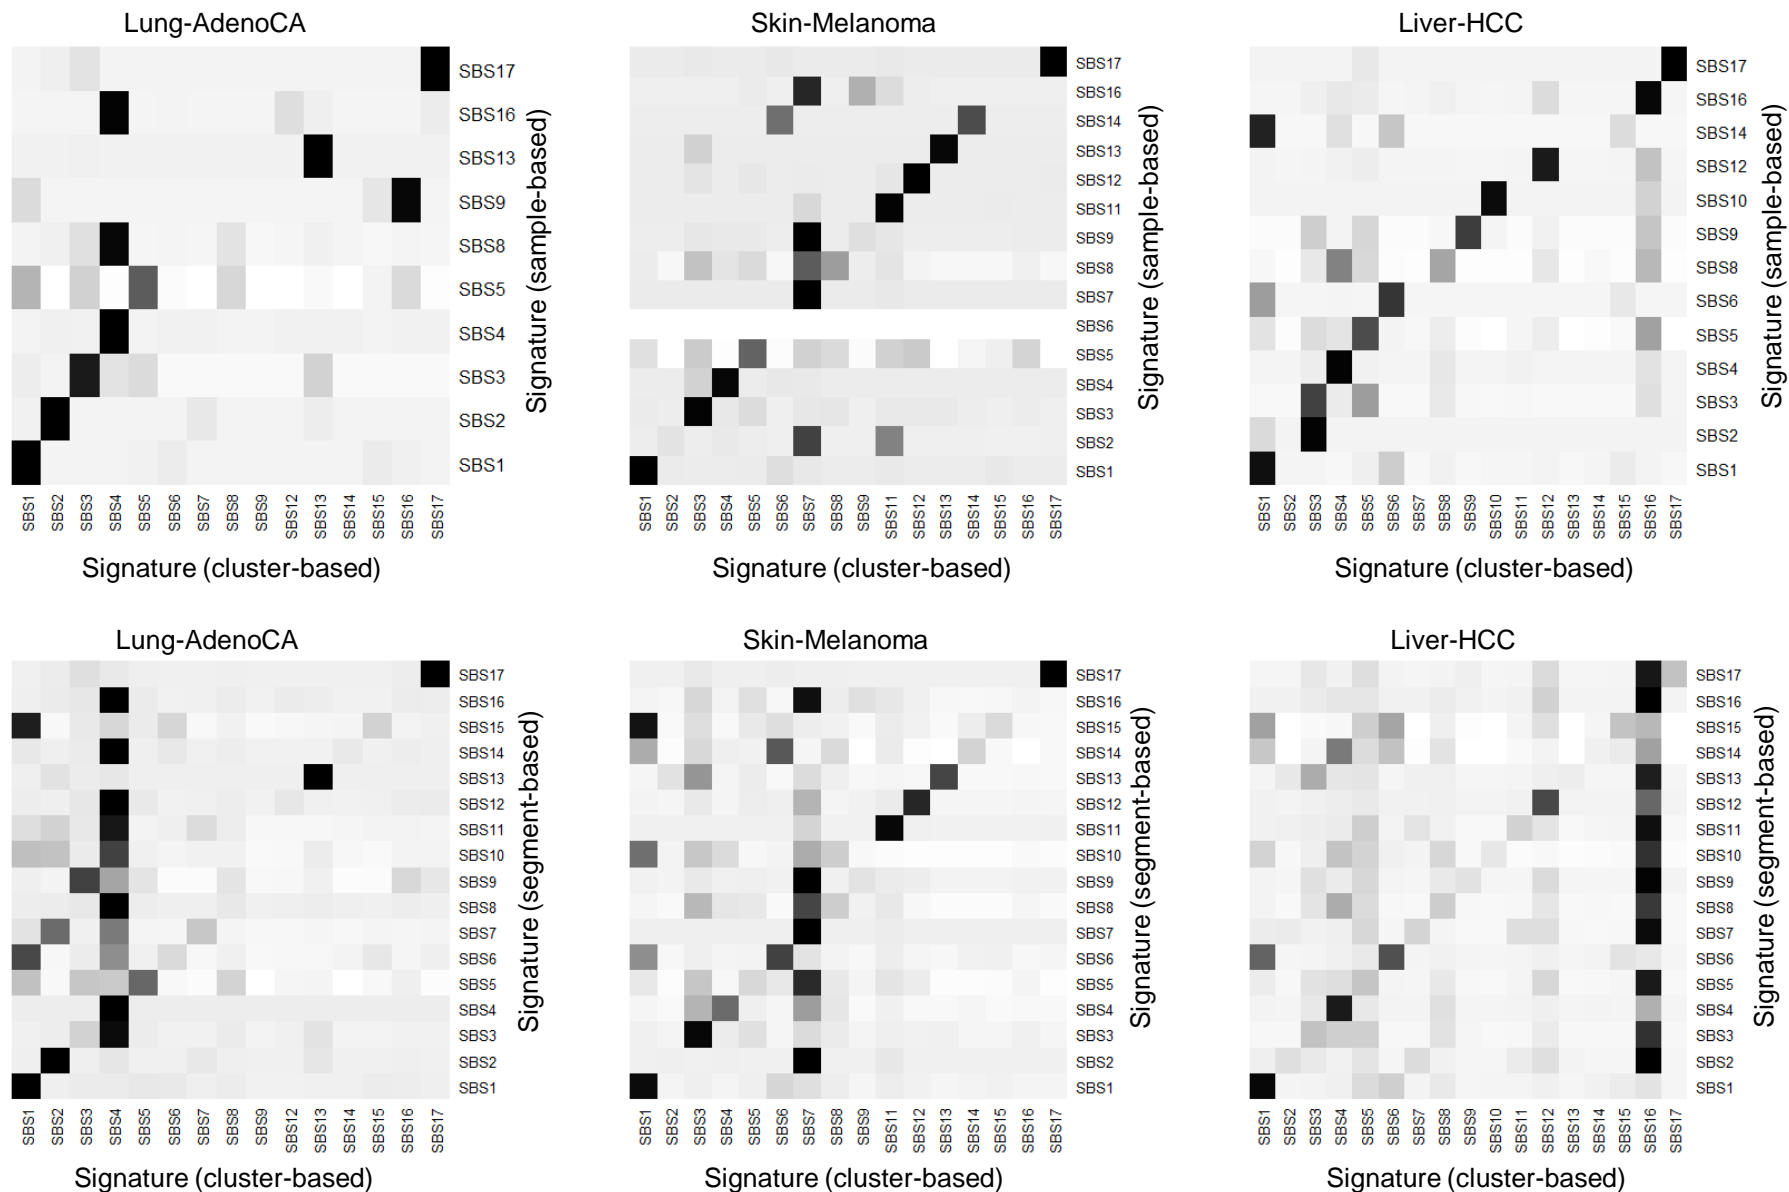

**Supplementary Fig. 3. Concordance of epigenetic and genetic features of mutation clusters.** Density plot of  $P$  value ( $-\log_{10}$  scales) were estimated for epigenetic (Repli-seq, left) and cancer cell fractions (CCF, right) are shown for individual tumor types. for each cancer type.

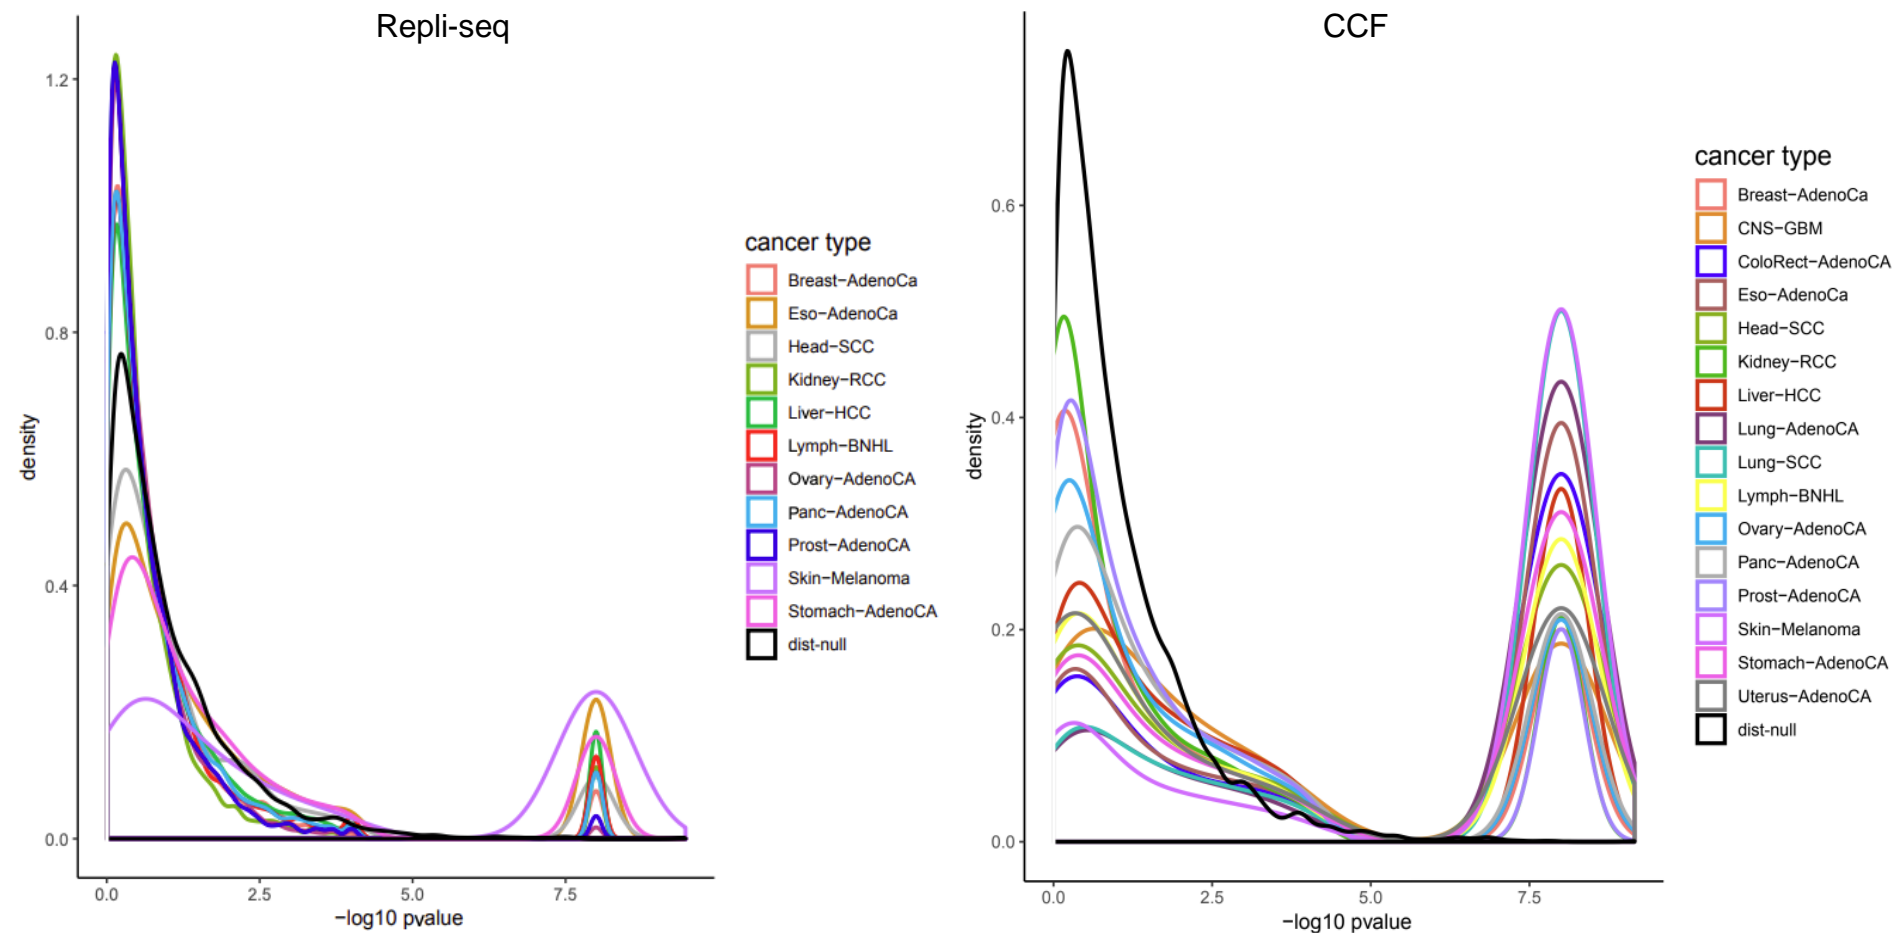

**Supplementary Fig. 4. Genomic and epigenetic correlation.** Various genetic and epigenetic features were measured in 1Mb and 100kb bins across genomes and correlated with the mutation density of mutation signatures. Heatmap shows scaled Pearson correlation coefficients (red and blue represent the high and low level of correlations, respectively).

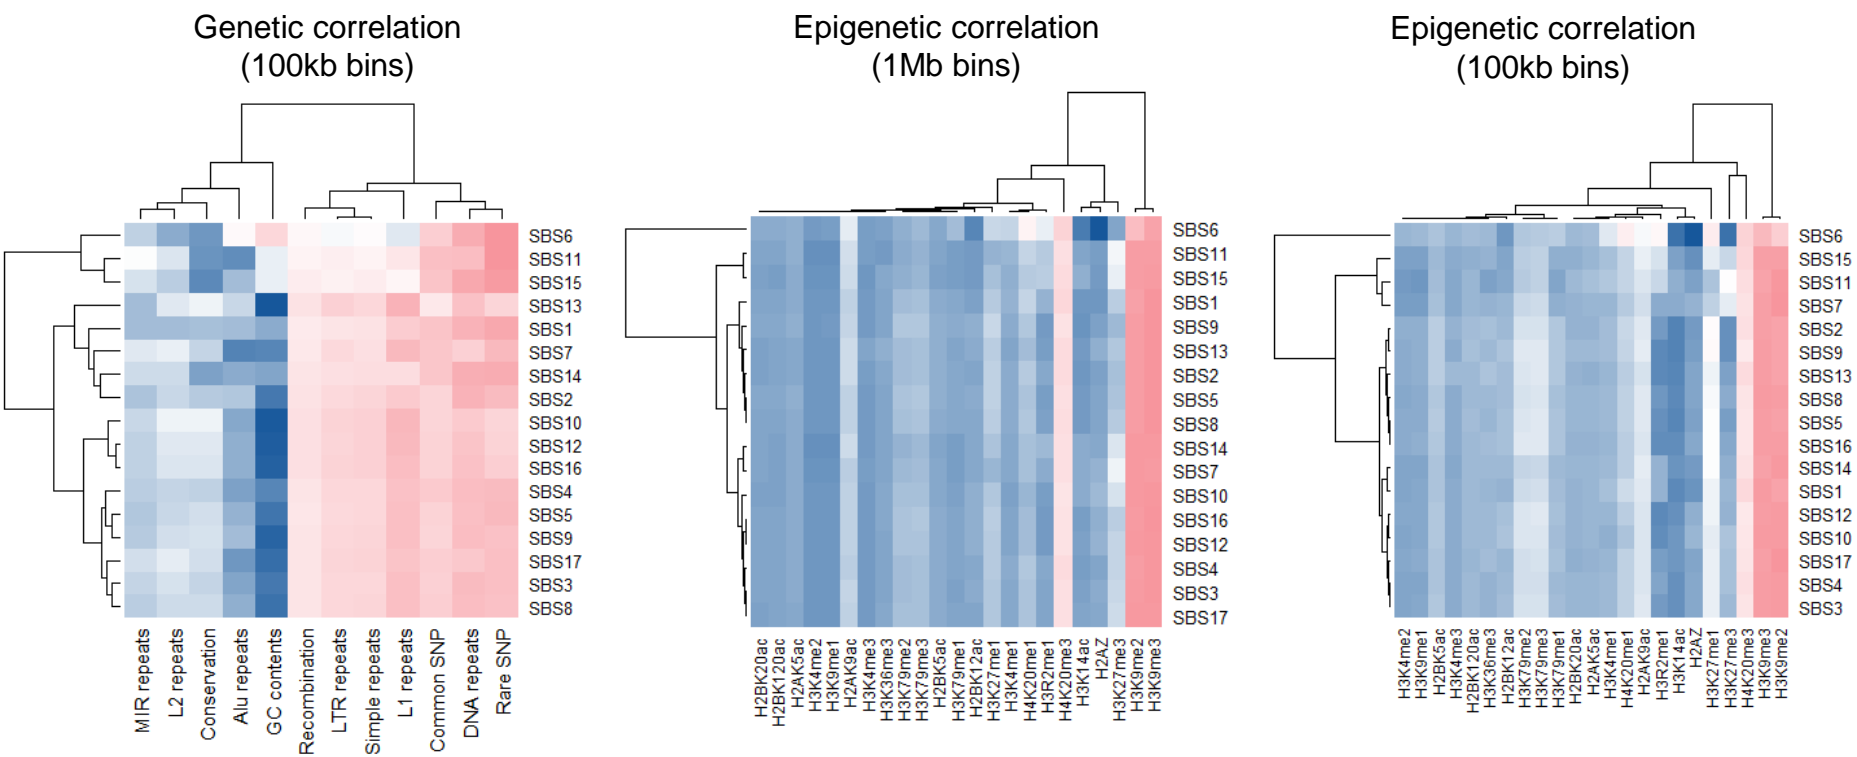

**Supplementary Fig. 5. Histone marks enrichment and depletion around the mutations.** (a) A total of 11 ChIP-seq datasets were obtained and the mutation-centric ChIP-seq signals are visualized with a heatmap visualization. Mutational strand asymmetries are shown in the order of mutation signatures. (b) ChIP-seq signals are shown in mutation-centric 2Kb windows. The signals are colored according to the level of replicative/transcriptional strand asymmetries as shown in a color bar (red and blue represent the replicative- and transcriptional mutation strand asymmetries, respectively)..

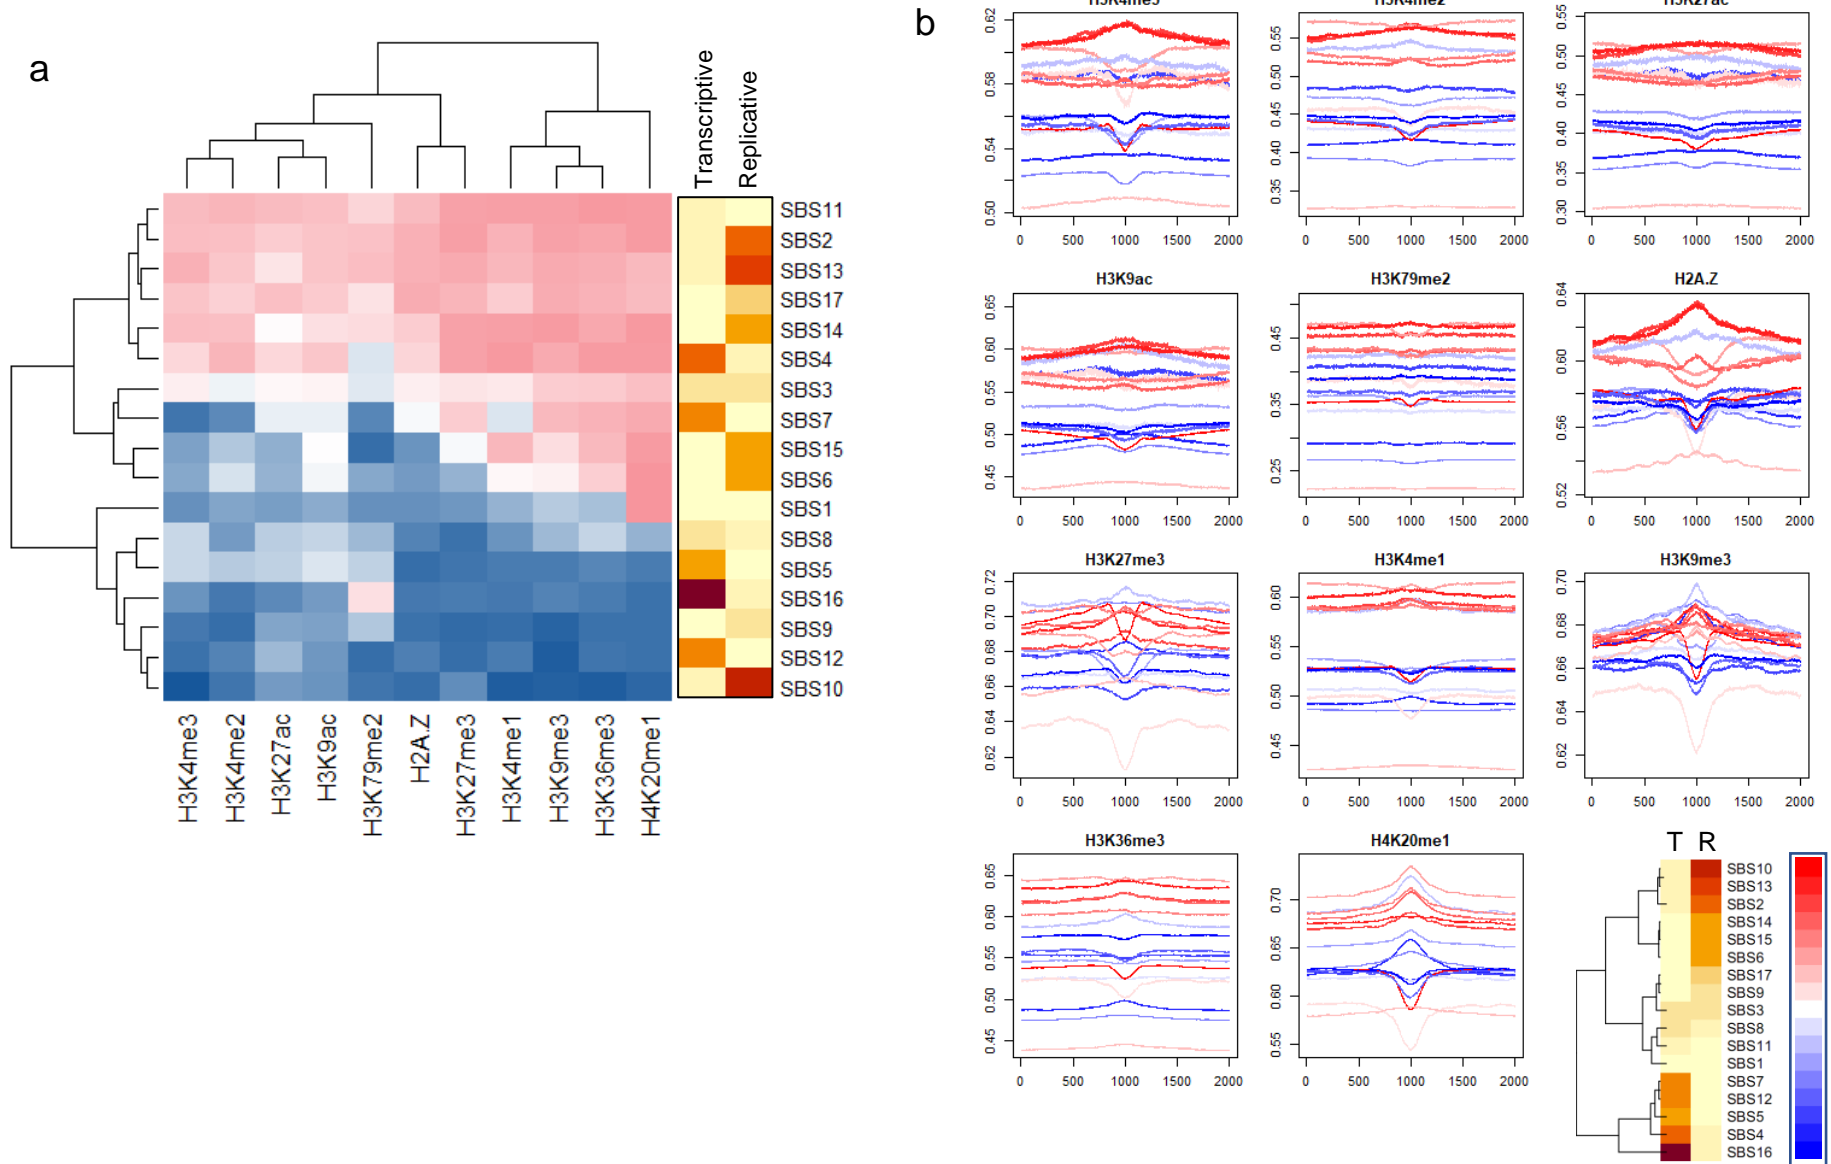

**Supplementary Fig. 6. Mutation density around nucleosome positioning.** The density of MNase-seq signals (K562 celllines) at the mutations are averaged across the mutation signatures and plotted in mutation-centric 2Kb windows.

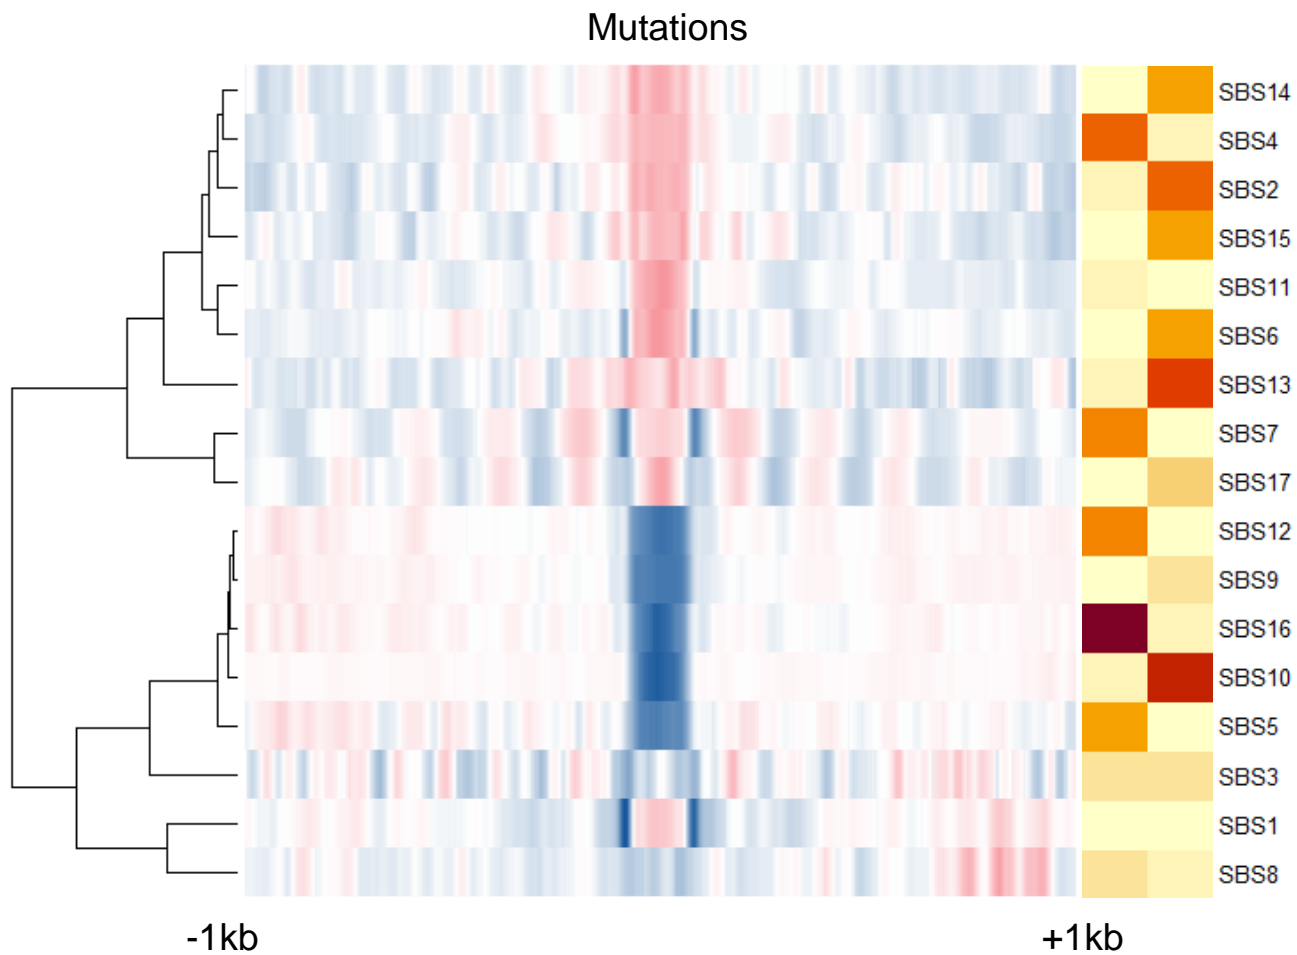

**Supplementary Fig. 7. Mutation signature composition per genomic region.** Relative abundance of mutations belonging to different mutation signatures are estimated across exonic-intronic-intergenic regions (left) and also for functional categories (right).

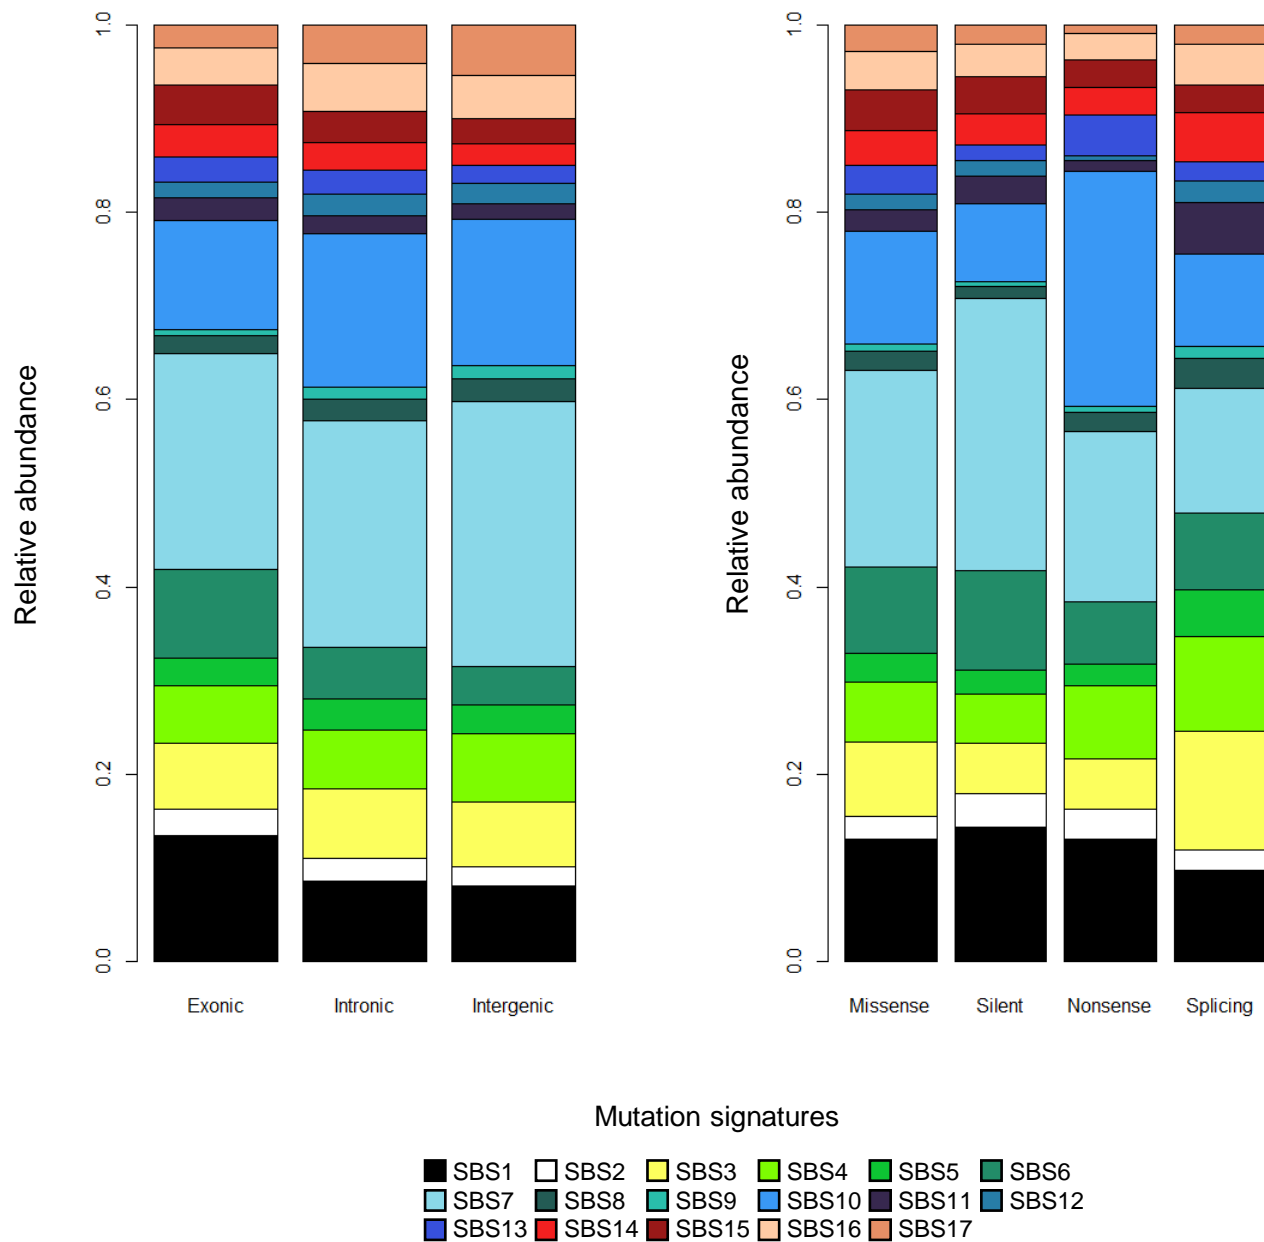



**Supplementary Fig. 8. Composition of mutation signatures at amino acid hotspots.** Four cancer-related genes of *TP53*, *KRAS*, *PIK3CA*, and *CTNNB1* are shown.

### *TP53*

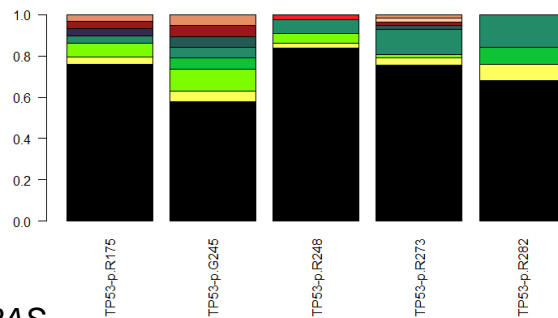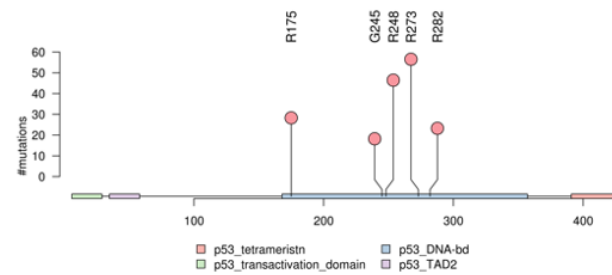

### *KRAS*

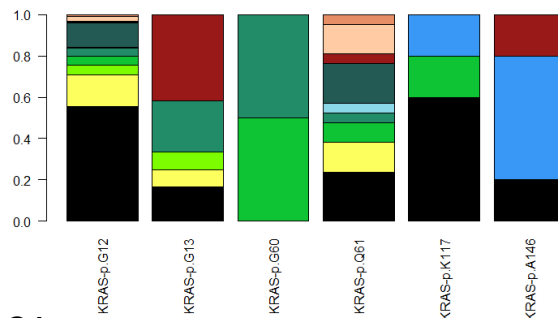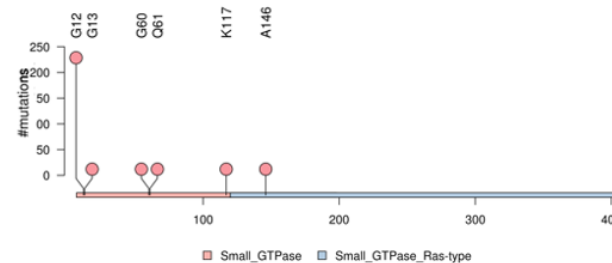

### *PIK3CA*

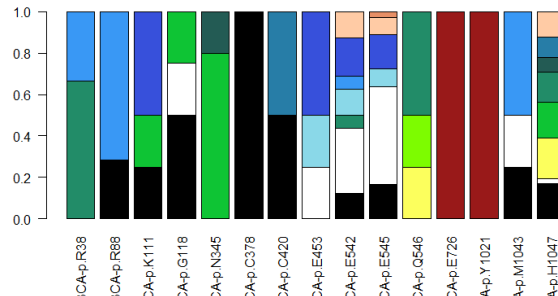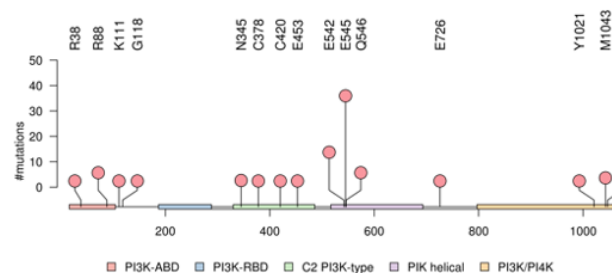

### *CTNNB1*

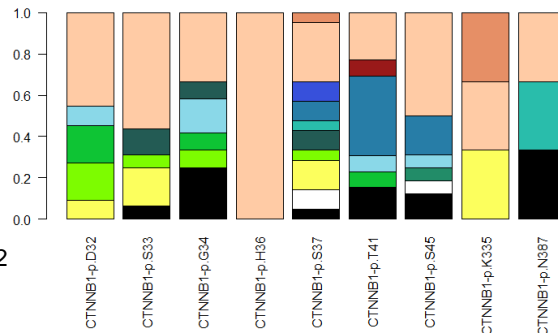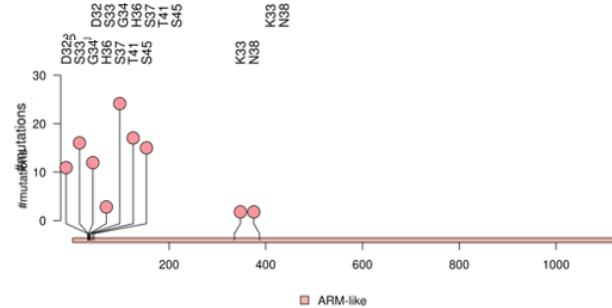

#### Mutation signatures

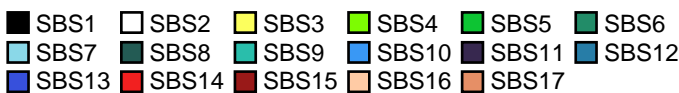

**Supplementary Fig. 9. Frequency of mutation signatures in 107 recurrently mutated amino acid hotspots.** Arrows indicate two examples of heterogeneous etiologies of mutational processes (*PIK3CA*-E542 and –H1047) along with those with dominant etiologies (*KRAS*-G12 and *BRAF*-V600 with SBS1 and SBS7/SBS11, respectively).

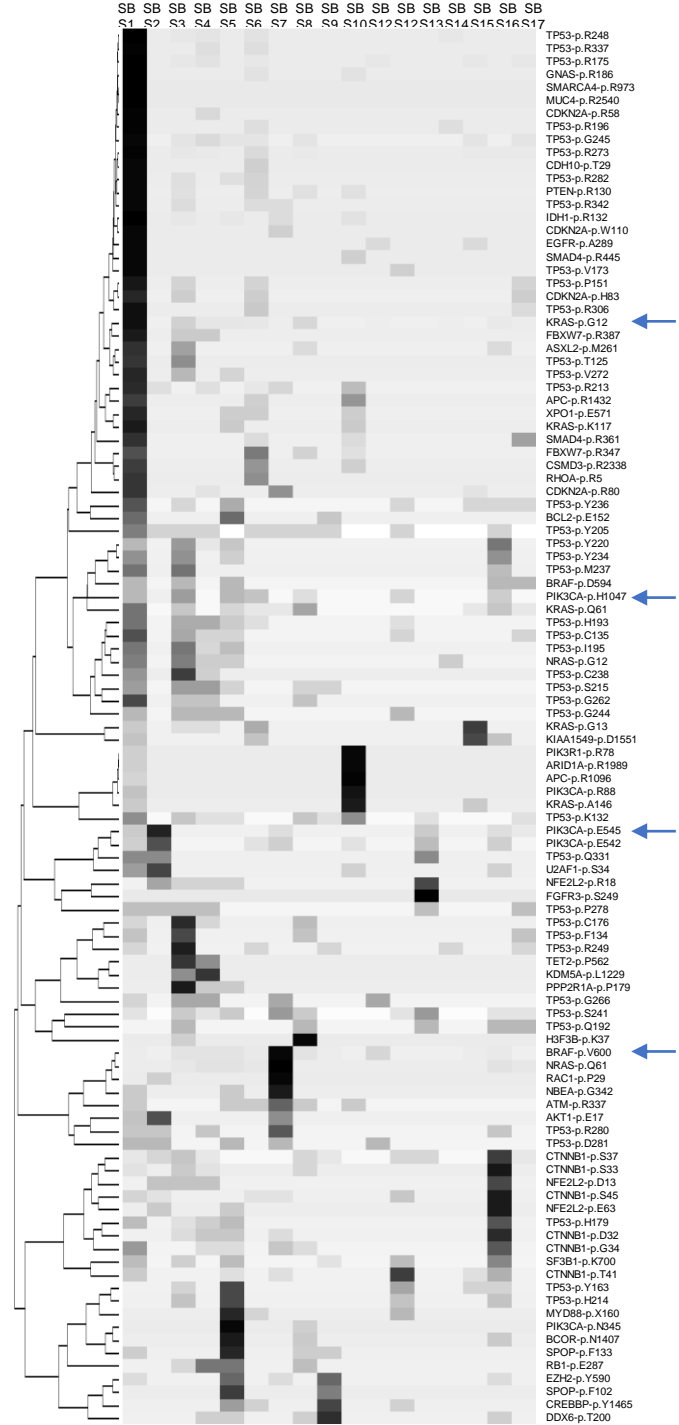

**Supplementary Fig. 10. The level of evolutionary selections and clonality of mutation signatures.** Two measures of the evolutionary selection (dNdSCV) and mutation clonality (cancer cell fraction, CCF) are plotted across 17 mutation signatures.

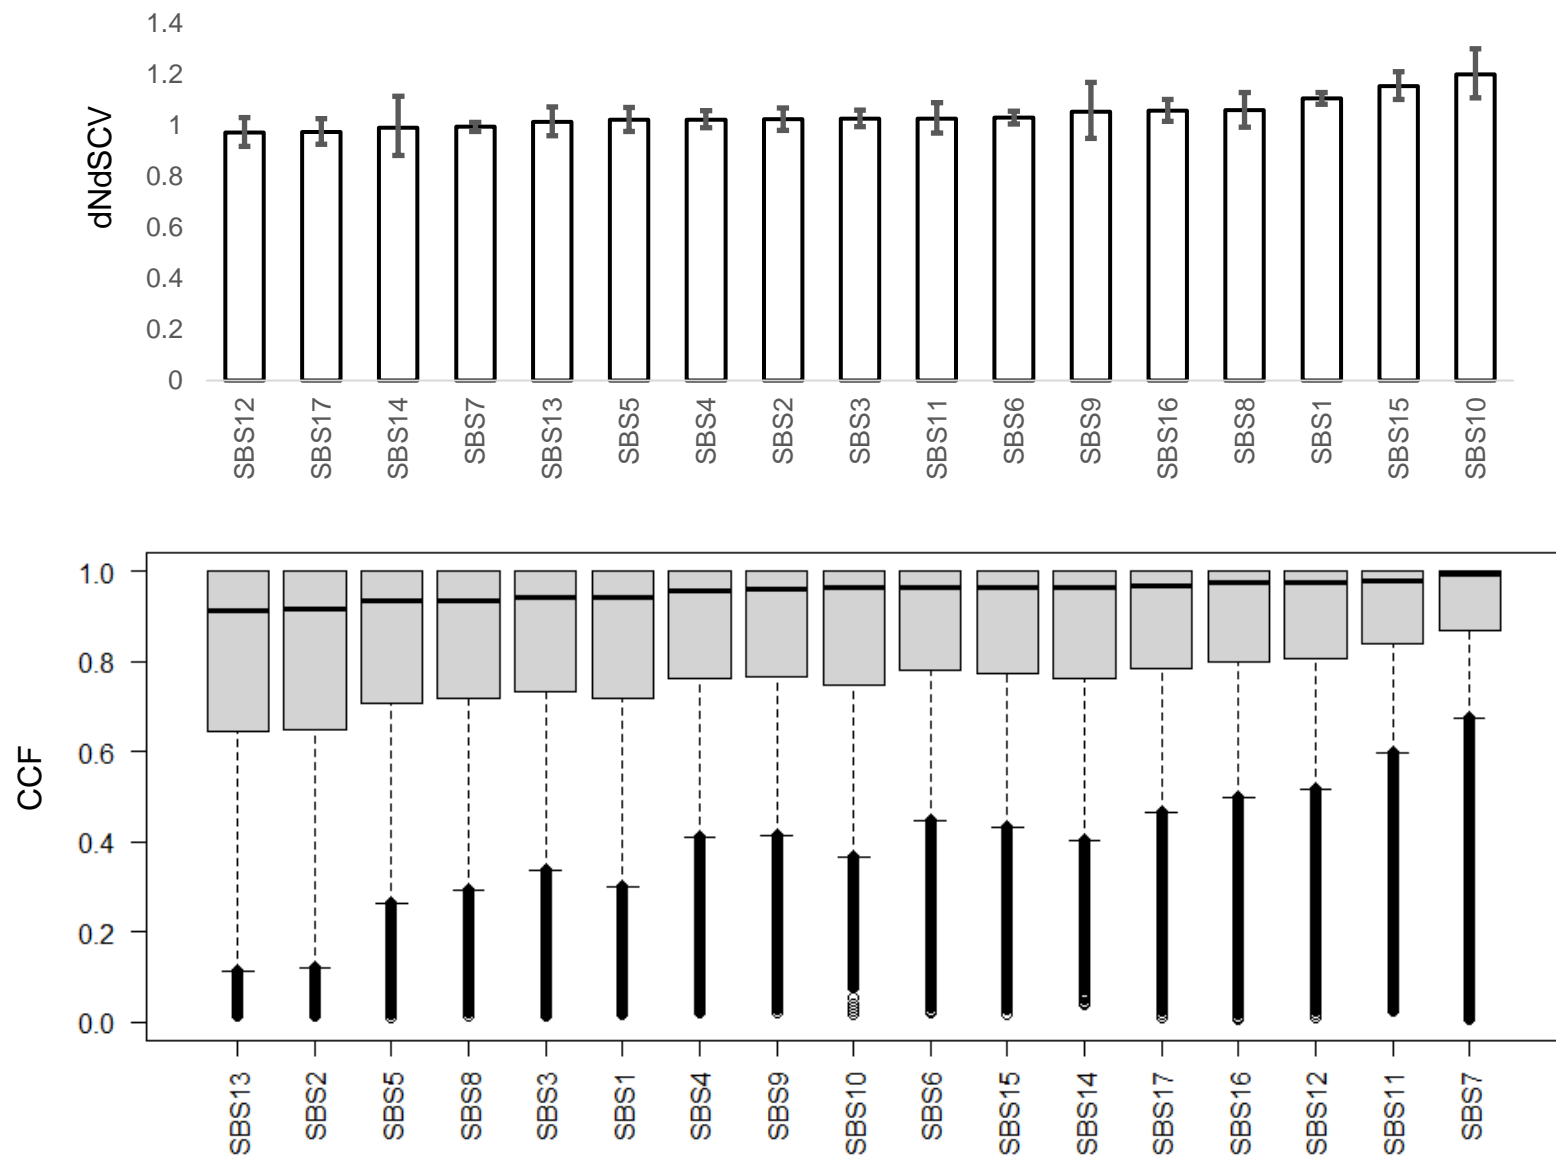

**Supplementary Fig. 11. Strand asymmetry related to DNA replication.** APOBEC associated signatures of SBS2 and SBS13 show a relatively higher density of C>A, C>G, C>T type of mutations in right-replicating regions representing lagging strands, whereas POLE associated signatures (SBS10 and SBS14) had the same pattern for left-replicating regions representing leading strands. Error bars represent 95% confidence intervals. Y-axis shows the log<sub>2</sub> ratio of mutation density per mutation type.

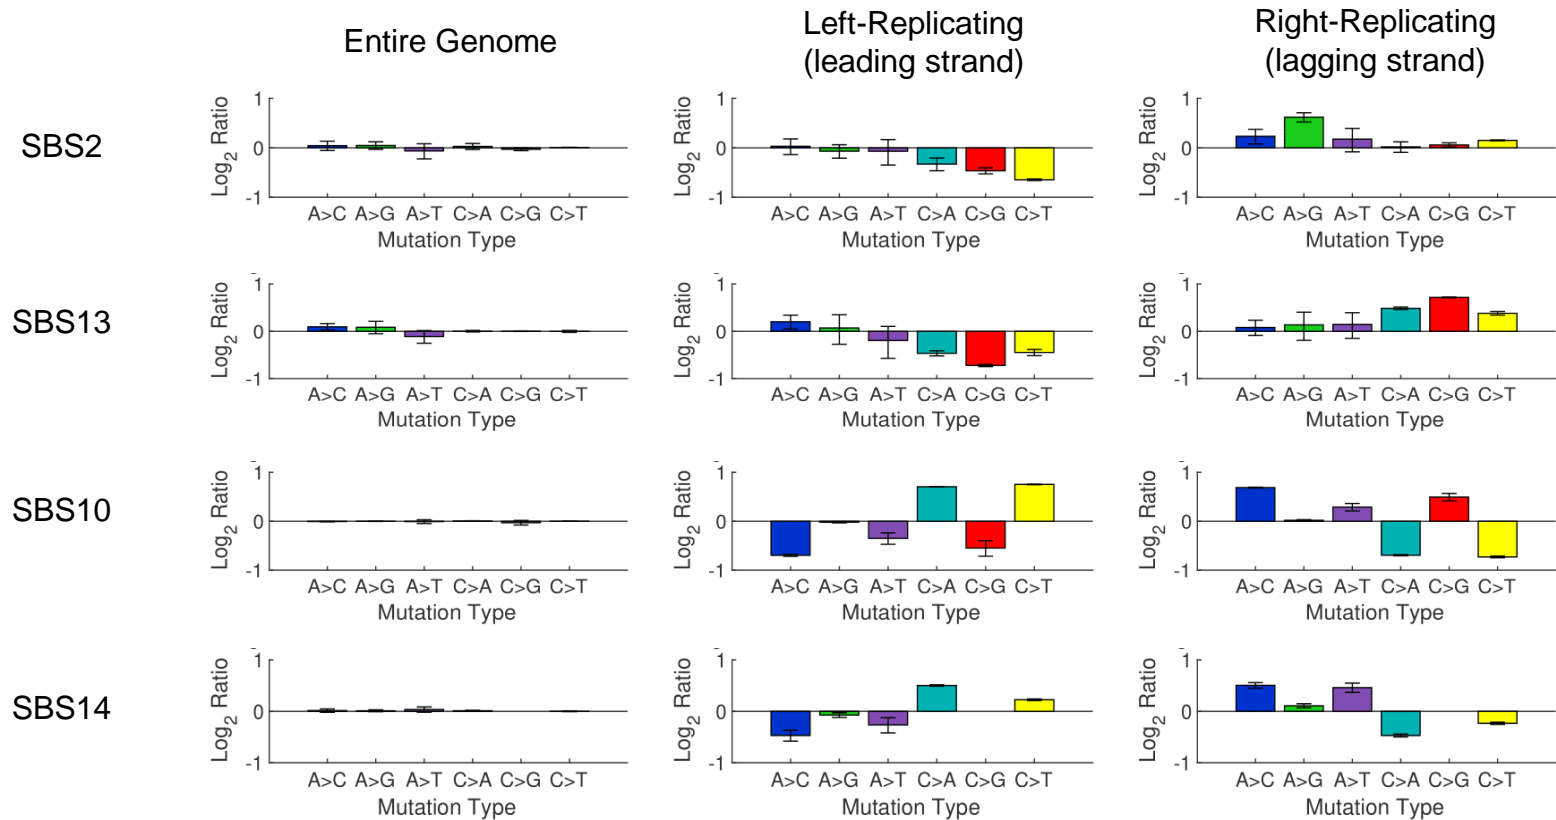

**Supplementary Table 1. Tumor types.** Tumor types as available in International Cancer Genome Consortium are shown with the number of samples. A total of 1925 cases are those with > 3000 mutations were used for the study.

| Tumor type       | Case no. |
|------------------|----------|
| Biliary-AdenoCA  | 29       |
| Bladder-TCC      | 23       |
| Bone-Epith       | 2        |
| Bone-Leiomyo     | 28       |
| Bone-Osteosarc   | 22       |
| Breast-AdenoCa   | 141      |
| Breast-LobularCa | 6        |
| Cervix-AdenoCA   | 1        |
| Cervix-SCC       | 17       |
| CNS-GBM          | 40       |
| CNS-Medullo      | 13       |
| CNS-Oligo        | 4        |
| ColoRect-AdenoCA | 60       |
| Eso-AdenoCa      | 97       |
| Head-SCC         | 53       |
| Kidney-ChRCC     | 4        |
| Kidney-RCC       | 135      |
| Liver-HCC        | 320      |
| Lung-AdenoCA     | 33       |
| Lung-SCC         | 48       |
| Lymph-BNHL       | 92       |
| Lymph-CLL        | 21       |
| Lymph-NOS        | 2        |
| Myeloid-AML      | 1        |
| Myeloid-MPN      | 2        |
| Ovary-AdenoCA    | 108      |
| Panc-AdenoCA     | 222      |
| Panc-Endocrine   | 27       |
| Prost-AdenoCA    | 148      |
| Skin-Melanoma    | 105      |
| Stomach-AdenoCA  | 68       |
| Thy-AdenoCA      | 3        |
| Uterus-AdenoCA   | 50       |
| Total            | 1925     |

**Supplementary Table 2. Composition of mutation signatures of ICGC data.** For 30 mutation signatures (SBS1 to SBS30), the mutation abundance, top frequent tumor types and etiologies are listed.

| Mutation signature | Abundance | Percent | Top three tumor types                            | Abundance of top three tumor types | Frequency (%) of top three tumor types | Etiology                          | Reference |
|--------------------|-----------|---------|--------------------------------------------------|------------------------------------|----------------------------------------|-----------------------------------|-----------|
| SBS1               | 3662504   | 7.458   | Panc-AdenoCA/ColoRect-AdenoCA/Eso-AdenoCa        | 811716/460144/448005               | 22.163/12.564/12.232                   | Age                               | [1]       |
| SBS2               | 955498    | 1.946   | Breast-AdenoCa/Head-SCC/Bladder-TCC              | 222058/138718/124128               | 23.24/14.518/12.991                    | APOBEC                            | [1]       |
| SBS3               | 3137073   | 6.388   | Ovary-AdenoCA/Breast-AdenoCa/Kidney-RCC          | 566675/537151/280333               | 18.064/17.123/8.936                    | BRCA1/2 Mutations                 | [1]       |
| SBS4               | 3088378   | 6.289   | Lung-SCC/Lung-AdenoCA/Liver-HCC                  | 1215386/1057574/365926             | 39.354/34.244/11.848                   | Smoking                           | [1]       |
| SBS5               | 1379937   | 2.810   | Liver-HCC/Lymph-BNHL/Prost-AdenoCA               | 255151/189048/154538               | 18.49/13.7/11.199                      |                                   |           |
| SBS6               | 2060235   | 4.195   | ColoRect-AdenoCA/Stomach-AdenoCA/Uterus-AdenoCA  | 627171/522685/414909               | 30.442/25.37/20.139                    | DNA MMR deficiency                | [1]       |
| SBS7               | 11898040  | 24.227  | Skin-Melanoma/Liver-HCC/Lung-SCC                 | 11691478/26409/22552               | 98.264/0.222/0.19                      | Ultraviolet light                 | [1]       |
| SBS8               | 1059440   | 2.157   | Liver-HCC/Kidney-RCC/Panc-AdenoCA                | 156400/119607/117177               | 14.763/11.29/11.06                     |                                   |           |
| SBS9               | 580531    | 1.182   | Lymph-BNHL/Eso-AdenoCa/Stomach-AdenoCA           | 261111/74833/54394                 | 44.978/12.89/9.37                      | Immunoglobulin gene hypermutation | [1]       |
| SBS10              | 6992054   | 14.237  | ColoRect-AdenoCA/Uterus-AdenoCA/Lymph-BNHL       | 6685783/274167/4871                | 95.62/3.921/0.07                       | POLE mutations                    | [1]       |
| SBS11              | 787086    | 1.603   | Skin-Melanoma/CNS-GBM/Lymph-BNHL                 | 392818/243675/31004                | 49.908/30.959/3.939                    | Temozolomide                      | [1]       |
| SBS12              | 968164    | 1.971   | Liver-HCC/Uterus-AdenoCA/Stomach-AdenoCA         | 628662/76713/54830                 | 64.933/7.924/5.663                     |                                   |           |
| SBS13              | 976612    | 1.989   | Breast-AdenoCa/Lung-SCC/Head-SCC                 | 211189/164718/152755               | 21.625/16.866/15.641                   | APOBEC                            | [1]       |
| SBS14              | 1109425   | 2.259   | Uterus-AdenoCA/ColoRect-AdenoCA/Stomach-AdenoCA  | 885611/142079/27634                | 79.826/12.807/2.491                    | POLE mutations                    | [2]       |
| SBS15              | 1308722   | 2.665   | ColoRect-AdenoCA/Uterus-AdenoCA/Stomach-AdenoCA  | 664576/413284/63319                | 50.781/31.579/4.838                    | DNA MMR deficiency                | [3]       |
| SBS16              | 2096772   | 4.270   | Liver-HCC/Lung-SCC/Head-SCC                      | 1539890/99394/82469                | 73.441/4.74/3.933                      |                                   |           |
| SBS17              | 2152382   | 4.383   | Eso-AdenoCa/Stomach-AdenoCA/Lymph-BNHL           | 1562646/325327/130790              | 72.601/15.115/6.077                    |                                   |           |
| SBS18              | 534441    | 1.088   | ColoRect-AdenoCA/Eso-AdenoCa/Stomach-AdenoCA     | 119882/86901/48761                 | 22.431/16.26/9.124                     |                                   |           |
| SBS19              | 412188    | 0.839   | Liver-HCC/Lymph-BNHL/Lung-SCC                    | 150102/43138/31642                 | 36.416/10.466/7.677                    | DNA MMR deficiency                | [3]       |
| SBS20              | 223136    | 0.454   | Stomach-AdenoCA/Liver-HCC/Uterus-AdenoCA         | 36177/30980/28762                  | 16.213/13.884/12.89                    | DNA MMR deficiency                | [3]       |
| SBS21              | 409327    | 0.833   | Stomach-AdenoCA/Biliary-AdenoCA/ColoRect-AdenoCA | 153439/75713/56893                 | 37.486/18.497/13.899                   |                                   |           |
| SBS22              | 207223    | 0.422   | Kidney-RCC/Liver-HCC/Ovary-AdenoCA               | 86604/83944/7489                   | 41.793/40.509/3.614                    | aristolochic acid                 | [3]       |
| SBS23              | 183076    | 0.373   | Skin-Melanoma/Liver-HCC/ColoRect-AdenoCA         | 70955/40540/18118                  | 38.757/22.144/9.896                    |                                   |           |
| SBS24              | 224395    | 0.457   | Liver-HCC/Lung-SCC/Kidney-RCC                    | 88124/39508/14942                  | 39.272/17.606/6.659                    | aflatoxin                         | [3]       |

|       |          |         |                                         |                     |                      |                    |     |
|-------|----------|---------|-----------------------------------------|---------------------|----------------------|--------------------|-----|
| SBS25 | 121089   | 0.247   | Liver-HCC/Prost-AdenoCA/Lung-SCC        | 36068/21970/10917   | 29.786/18.144/9.016  | DNA MMR deficiency | [3] |
| SBS26 | 297576   | 0.606   | Uterus-AdenoCA/Panc-AdenoCA/Liver-HCC   | 90434/57607/50686   | 30.39/19.359/17.033  | DNA MMR deficiency | [3] |
| SBS27 | 4093     | 0.008   | Kidney-RCC/Liver-HCC/Bone-Osteosarc     | 1355/567/452        | 33.105/13.853/11.043 |                    |     |
| SBS28 | 1493787  | 3.042   | ColoRect-AdenoCA/Lymph-BNHL/Eso-AdenoCa | 1338118/50409/21899 | 89.579/3.375/1.466   |                    |     |
| SBS29 | 262906   | 0.535   | Liver-HCC/Eso-AdenoCa/Lung-SCC          | 61453/44051/20926   | 23.375/16.755/7.959  | Smoking            | [3] |
| SBS30 | 278498   | 0.567   | Liver-HCC/Kidney-RCC/Lymph-BNHL         | 61227/33168/19361   | 21.985/11.91/6.952   |                    |     |
| Total | 48864588 | 100.000 |                                         |                     |                      |                    |     |

reference

1. Alexandrov, Ludmil B., et al. "Signatures of mutational processes in human cancer." *Nature* 500.7463 (2013): 415
2. Tomkova, Marketa, et al. "Mutational signature distribution varies with DNA replication timing and strand asymmet
3. [https://cancer.sanger.ac.uk/signatures/signatures\\_v2/](https://cancer.sanger.ac.uk/signatures/signatures_v2/)

Top three tumor types : The top three cancer types which each mutation signature occurs frequently.

Frequency : #mutations of i th signature/#total mutation with signature

**Supplementary Table 3. MutSig results.** Significantly recurrent genes across mutation signatures were identified. Mutations with significant recurrence (MutSig Q < 0.1) are listed with the used co-variates (expression/Expr, replication time/Reptime and HiC)

|       | Gene             | Expr*   | Reptime* | HiC* | Nonsilent | Silent | P value  | Q value (FDR) |
|-------|------------------|---------|----------|------|-----------|--------|----------|---------------|
| SBS1  | <i>CTU2</i>      | 802673  | 189      | 41   | 4         | 2      | 0        | 0             |
|       | <i>DTX1</i>      | 562320  | 387      | 44   | 9         | 0      | 0        | 0             |
|       | <i>FBXW7</i>     | 117295  | 501      | 51   | 11        | 1      | 0        | 0             |
|       | <i>IDH1</i>      | 260367  | 539      | 17   | 21        | 0      | 0        | 0             |
|       | <i>KRAS</i>      | 259193  | 512      | 16   | 132       | 2      | 0        | 0             |
|       | <i>PIK3CA</i>    | 401889  | 613      | 11   | 28        | 0      | 0        | 0             |
|       | <i>PTEN</i>      | 259678  | 300      | 34   | 25        | 0      | 0        | 0             |
|       | <i>RHOA</i>      | 1623187 | 201      | 33   | 6         | 0      | 0        | 0             |
|       | <i>SMAD4</i>     | 156084  | 422      | 41   | 28        | 0      | 0        | 0             |
|       | <i>TP53</i>      | 2069567 | 213      | 34   | 246       | 6      | 0        | 0             |
|       | <i>CDKN2A</i>    | 225405  | 357      | -15  | 31        | 2      | 1.83E-08 | 3.14E-05      |
|       | <i>APC</i>       | 247811  | 399      | 28   | 18        | 2      | 6.27E-06 | 0.009854      |
| SBS2  | <i>C20orf195</i> | 1262904 | 298      | 54   | 2         | 0      | 0        | 0             |
|       | <i>TP53</i>      | 2069567 | 213      | 34   | 13        | 0      | 0        | 0             |
|       | <i>PIK3CA</i>    | 401889  | 613      | 11   | 30        | 1      | 6.41E-11 | 4.03E-07      |
|       | <i>SMAD4</i>     | 156084  | 422      | 41   | 5         | 0      | 2.04E-05 | 0.096361      |
| SBS3  | <i>KRAS</i>      | 259193  | 512      | 16   | 39        | 0      | 0        | 0             |
|       | <i>PTEN</i>      | 259678  | 300      | 34   | 10        | 1      | 0        | 0             |
|       | <i>VHL</i>       | 825905  | 170      | 39   | 6         | 0      | 0        | 0             |
|       | <i>TP53</i>      | 2069567 | 213      | 34   | 89        | 3      | 1.18E-14 | 5.55E-11      |
| SBS4  | <i>C19orf57</i>  | 842601  | 185      | 32   | 3         | 1      | 0        | 0             |
|       | <i>KRAS</i>      | 259193  | 512      | 16   | 11        | 0      | 0        | 0             |
|       | <i>SPRED2</i>    | 545446  | 346      | 36   | 3         | 0      | 0        | 0             |
|       | <i>TP53</i>      | 2069567 | 213      | 34   | 45        | 0      | 0        | 0             |
|       | <i>CDKN2A</i>    | 225405  | 357      | -15  | 6         | 0      | 2.59E-07 | 0.000975      |
| SBS5  | <i>CHTF8</i>     | 1179391 | 201      | 24   | 2         | 0      | 0        | 0             |
|       | <i>KRAS</i>      | 259193  | 512      | 16   | 14        | 0      | 0        | 0             |
|       | <i>PIK3CA</i>    | 401889  | 613      | 11   | 17        | 0      | 0        | 0             |
|       | <i>SPOP</i>      | 943930  | 348      | 28   | 12        | 0      | 0        | 0             |
|       | <i>TP53</i>      | 2069567 | 213      | 34   | 38        | 0      | 0        | 0             |
|       | <i>PTEN</i>      | 259678  | 300      | 34   | 5         | 0      | 2.89E-05 | 0.07785       |
| SBS6  | <i>KRAS</i>      | 259193  | 512      | 16   | 13        | 0      | 0        | 0             |
|       | <i>TP53</i>      | 2069567 | 213      | 34   | 34        | 0      | 0        | 0             |
| SBS7  | <i>CDKN2A</i>    | 225405  | 357      | -15  | 20        | 1      | 0        | 0             |
|       | <i>TP53</i>      | 2069567 | 213      | 34   | 49        | 0      | 2.11E-14 | 1.99E-10      |
|       | <i>BRAF</i>      | 305191  | 616      | 25   | 45        | 1      | 7.63E-09 | 4.8E-05       |
|       | <i>NRAS</i>      | 600650  | 472      | 11   | 20        | 1      | 7.35E-08 | 0.000347      |
| SBS8  | <i>KRAS</i>      | 259193  | 512      | 16   | 30        | 1      | 0        | 0             |
|       | <i>PEX13</i>     | 635177  | 350      | 33   | 2         | 0      | 0        | 0             |
|       | <i>TP53</i>      | 2069567 | 213      | 34   | 23        | 0      | 0        | 0             |
| SBS9  | <i>B2M</i>       | 673122  | 428      | 36   | 8         | 0      | 0        | 0             |
| SBS10 | <i>TP53</i>      | 2069567 | 213      | 34   | 21        | 0      | 4.45E-07 | 0.007383      |
|       | <i>VHL</i>       | 825905  | 170      | 39   | 5         | 0      | 7.83E-07 | 0.007383      |
| SBS12 | <i>TP53</i>      | 2069567 | 213      | 34   | 11        | 0      | 2.62E-08 | 0.000494      |
| SBS13 | <i>TP53</i>      | 2069567 | 213      | 34   | 10        | 0      | 0        | 0             |
|       | <i>PIK3CA</i>    | 401889  | 613      | 11   | 15        | 1      | 7.68E-07 | 0.007242      |
| SBS15 | <i>SOCS1</i>     | 632841  | 308      | 37   | 4         | 0      | 0        | 0             |
|       | <i>TP53</i>      | 2069567 | 213      | 34   | 9         | 0      | 8.32E-05 | 0.785116      |
| SBS16 | <i>CTNNB1</i>    | 305811  | 448      | 8    | 46        | 1      | 0        | 0             |
|       | <i>TP53</i>      | 2069567 | 213      | 34   | 37        | 1      | 0        | 0             |



|       |               |         |     |    |    |   |          |          |
|-------|---------------|---------|-----|----|----|---|----------|----------|
|       | <i>PIK3CA</i> | 401889  | 613 | 11 | 14 | 2 | 4.55E-06 | 0.028623 |
|       | <i>KRAS</i>   | 259193  | 512 | 16 | 8  | 0 | 1.99E-05 | 0.093798 |
| SBS17 | <i>TP53</i>   | 2069567 | 213 | 34 | 21 | 0 | 1.59E-14 | 2.99E-10 |

\* indicates co-variate used for MutSig

False discovery rate (Q values) < 0.1 were significant

**Supplementary Table 4. Driver mutations with high level of positive selections.** Genes with significantly elevated dNdSCV values for missense mutations (Qmissense < 0.2) are listed across mutation signatures. Wmis represents the dNdSCV values of missense mutations.

| Mutation signature | Gene                  | Synonymous | Missense | Non-sense | Splicing | Wmis   | Wtru   | Pmissense | Ptrunc  | Pallsub_s_cv | Qmissense | Qtrunc_cv | Qallsub_s_cv |
|--------------------|-----------------------|------------|----------|-----------|----------|--------|--------|-----------|---------|--------------|-----------|-----------|--------------|
| SBS1               | <i>TP53</i>           | 4          | 222      | 47        | 11       | 119.52 | 370.24 | 0.0E+00   | 0.0E+00 | 0.0E+00      | 0.0E+00   | 0.0E+00   | 0.0E+00      |
| SBS1               | <i>SMAD4</i>          | 1          | 26       | 9         | 2        | 33.002 | 139.32 | 0.0E+00   | 0.0E+00 | 0.0E+00      | 0.0E+00   | 0.0E+00   | 0.0E+00      |
| SBS1               | <i>PIK3CA</i>         | 1          | 34       | 1         | 0        | 26.464 | 3.3061 | 0.0E+00   | 3.4E-01 | 0.0E+00      | 0.0E+00   | 9.4E-01   | 0.0E+00      |
| SBS1               | <i>IDH1</i>           | 0          | 24       | 0         | 0        | 40.424 | 0      | 0.0E+00   | 7.2E-01 | 0.0E+00      | 0.0E+00   | 9.4E-01   | 0.0E+00      |
| SBS1               | <i>KRAS</i>           | 1          | 133      | 0         | 0        | 636.2  | 0      | 0.0E+00   | 8.1E-01 | 0.0E+00      | 0.0E+00   | 9.4E-01   | 0.0E+00      |
| SBS1               | <i>PTEN</i>           | 1          | 18       | 9         | 2        | 37.488 | 140.51 | 3.3E-16   | 0.0E+00 | 0.0E+00      | 1.1E-12   | 0.0E+00   | 0.0E+00      |
| SBS1               | <i>CDKN2A.p16INK4</i> | 1          | 13       | 19        | 0        | 10.251 | 416.79 | 1.3E-06   | 0.0E+00 | 0.0E+00      | 2.1E-03   | 0.0E+00   | 0.0E+00      |
| SBS1               | <i>FBXW7</i>          | 0          | 15       | 6         | 2        | 22.281 | 58.588 | 1.1E-10   | 2.0E-10 | 1.4E-15      | 2.7E-07   | 4.4E-07   | 2.9E-12      |
| SBS1               | <i>CDKN2A.p14arf</i>  | 2          | 25       | 0         | 0        | 17.077 | 0      | 8.9E-14   | 6.5E-01 | 5.7E-13      | 2.6E-10   | 9.4E-01   | 9.5E-10      |
| SBS1               | <i>DDX3X</i>          | 0          | 14       | 0         | 0        | 14.262 | 0      | 5.2E-08   | 7.1E-01 | 2.9E-07      | 1.2E-04   | 9.4E-01   | 3.6E-04      |
| SBS1               | <i>SMARCA4</i>        | 3          | 30       | 1         | 0        | 6.4456 | 3.2407 | 1.6E-07   | 3.4E-01 | 1.1E-06      | 3.2E-04   | 9.4E-01   | 1.1E-03      |
| SBS1               | <i>CTNNB1</i>         | 1          | 14       | 0         | 0        | 10.002 | 0      | 9.0E-07   | 5.7E-01 | 3.6E-06      | 1.7E-03   | 9.4E-01   | 3.3E-03      |
| SBS1               | <i>IGLL5</i>          | 6          | 9        | 0         | 2        | 7.4389 | 24.381 | 5.5E-05   | 3.3E-03 | 9.6E-06      | 5.0E-02   | 8.7E-01   | 7.5E-03      |
| SBS1               | <i>C17orf80</i>       | 0          | 9        | 0         | 0        | 14.203 | 0      | 3.0E-06   | 7.0E-01 | 1.5E-05      | 4.7E-03   | 9.4E-01   | 1.1E-02      |
| SBS1               | <i>OR8B8</i>          | 0          | 9        | 0         | 0        | 12.556 | 0      | 7.7E-06   | 8.7E-01 | 4.4E-05      | 1.1E-02   | 9.4E-01   | 2.9E-02      |
| SBS1               | <i>GNAS</i>           | 10         | 23       | 0         | 0        | 4.1705 | 0      | 1.6E-05   | 4.5E-01 | 5.3E-05      | 1.9E-02   | 9.4E-01   | 3.4E-02      |
| SBS1               | <i>SPANXD</i>         | 1          | 5        | 0         | 0        | 24.602 | 0      | 1.1E-05   | 8.6E-01 | 6.4E-05      | 1.5E-02   | 9.4E-01   | 3.9E-02      |
| SBS1               | <i>S100A4</i>         | 0          | 4        | 0         | 0        | 40.043 | 0      | 1.2E-05   | 9.2E-01 | 7.0E-05      | 1.5E-02   | 9.5E-01   | 4.1E-02      |
| SBS1               | <i>MAP2K7</i>         | 1          | 8        | 1         | 0        | 9.431  | 28.253 | 7.8E-05   | 3.2E-02 | 7.9E-05      | 5.6E-02   | 9.4E-01   | 4.5E-02      |
| SBS1               | <i>EGFR</i>           | 5          | 22       | 1         | 0        | 4.6048 | 2.3888 | 3.0E-05   | 4.6E-01 | 1.6E-04      | 3.3E-02   | 9.4E-01   | 8.9E-02      |
| SBS1               | <i>EMILIN1</i>        | 1          | 13       | 0         | 0        | 7.1141 | 0      | 4.0E-05   | 6.6E-01 | 1.7E-04      | 4.2E-02   | 9.4E-01   | 9.0E-02      |
| SBS1               | <i>ZNF527</i>         | 1          | 10       | 0         | 0        | 8.2146 | 0      | 5.4E-05   | 6.0E-01 | 2.1E-04      | 5.0E-02   | 9.4E-01   | 1.1E-01      |
| SBS1               | <i>BRAF</i>           | 1          | 10       | 0         | 0        | 7.9515 | 0      | 6.9E-05   | 4.9E-01 | 2.1E-04      | 5.4E-02   | 9.4E-01   | 1.1E-01      |
| SBS1               | <i>PRRX1</i>          | 0          | 7        | 1         | 0        | 9.7345 | 19.165 | 2.1E-04   | 5.0E-02 | 2.9E-04      | 1.2E-01   | 9.4E-01   | 1.3E-01      |
| SBS1               | <i>KRTAP2-1</i>       | 0          | 3        | 0         | 0        | 51.954 | 0      | 5.5E-05   | 9.7E-01 | 2.9E-04      | 5.0E-02   | 9.7E-01   | 1.3E-01      |
| SBS1               | <i>ZNF595</i>         | 0          | 4        | 0         | 0        | 26.899 | 0      | 5.9E-05   | 8.5E-01 | 3.1E-04      | 5.2E-02   | 9.4E-01   | 1.3E-01      |
| SBS1               | <i>PPP1R35</i>        | 0          | 7        | 0         | 0        | 11.896 | 0      | 6.3E-05   | 8.0E-01 | 3.1E-04      | 5.3E-02   | 9.4E-01   | 1.3E-01      |
| SBS1               | <i>SCRN1</i>          | 0          | 8        | 0         | 0        | 10.307 | 0      | 6.8E-05   | 7.7E-01 | 3.3E-04      | 5.4E-02   | 9.4E-01   | 1.3E-01      |
| SBS1               | <i>PPP2R1A</i>        | 1          | 9        | 0         | 0        | 8.579  | 0      | 7.3E-05   | 7.0E-01 | 3.3E-04      | 5.5E-02   | 9.4E-01   | 1.3E-01      |
| SBS1               | <i>C19orf35</i>       | 0          | 9        | 0         | 0        | 8.807  | 0      | 1.0E-04   | 8.1E-01 | 4.8E-04      | 6.9E-02   | 9.4E-01   | 1.8E-01      |
| SBS1               | <i>PXDN</i>           | 4          | 22       | 2         | 0        | 3.8915 | 7.1156 | 3.1E-04   | 4.3E-02 | 5.6E-04      | 1.6E-01   | 9.4E-01   | 2.0E-01      |
| SBS1               | <i>GPR4</i>           | 0          | 11       | 0         | 0        | 7.376  | 0      | 1.3E-04   | 7.9E-01 | 6.1E-04      | 8.8E-02   | 9.4E-01   | 2.1E-01      |
| SBS1               | <i>SF3B1</i>          | 0          | 9        | 0         | 0        | 7.9208 | 0      | 2.1E-04   | 5.6E-01 | 6.9E-04      | 1.2E-01   | 9.4E-01   | 2.3E-01      |
| SBS1               | <i>PTPN11</i>         | 1          | 8        | 0         | 0        | 7.9035 | 0      | 2.4E-04   | 6.4E-01 | 9.5E-04      | 1.4E-01   | 9.4E-01   | 2.9E-01      |
| SBS1               | <i>RPL19</i>          | 0          | 5        | 0         | 0        | 14.052 | 0      | 2.1E-04   | 7.7E-01 | 9.6E-04      | 1.2E-01   | 9.4E-01   | 2.9E-01      |
| SBS1               | <i>KHDRBS3</i>        | 2          | 8        | 0         | 0        | 7.4768 | 0      | 2.5E-04   | 6.1E-01 | 9.6E-04      | 1.4E-01   | 9.4E-01   | 2.9E-01      |
| SBS1               | <i>KRTAP4-12</i>      | 0          | 4        | 0         | 0        | 19.47  | 0      | 2.1E-04   | 8.9E-01 | 1.0E-03      | 1.2E-01   | 9.4E-01   | 2.9E-01      |
| SBS1               | <i>DDX50</i>          | 1          | 7        | 0         | 0        | 8.5544 | 0      | 3.0E-04   | 5.6E-01 | 1.1E-03      | 1.6E-01   | 9.4E-01   | 2.9E-01      |
| SBS1               | <i>HCK</i>            | 0          | 9        | 0         | 0        | 7.5385 | 0      | 2.9E-04   | 6.3E-01 | 1.1E-03      | 1.6E-01   | 9.4E-01   | 2.9E-01      |
| SBS1               | <i>SLC18A2</i>        | 0          | 9        | 0         | 0        | 7.4501 | 0      | 3.1E-04   | 6.4E-01 | 1.2E-03      | 1.6E-01   | 9.4E-01   | 3.1E-01      |
| SBS1               | <i>KCNA6</i>          | 0          | 9        | 0         | 0        | 7.3929 | 0      | 3.3E-04   | 7.5E-01 | 1.4E-03      | 1.6E-01   | 9.4E-01   | 3.5E-01      |
| SBS1               | <i>CAPN8</i>          | 0          | 9        | 0         | 0        | 7.1674 | 0      | 4.0E-04   | 6.2E-01 | 1.4E-03      | 1.9E-01   | 9.4E-01   | 3.6E-01      |
| SBS1               | <i>CTSD</i>           | 1          | 6        | 0         | 0        | 9.6292 | 0      | 3.6E-04   | 8.1E-01 | 1.6E-03      | 1.7E-01   | 9.4E-01   | 4.0E-01      |
| SBS2               | <i>PIK3CA</i>         | 1          | 29       | 0         | 0        | 53.554 | 0      | 0.0E+00   | 6.5E-01 | 0.0E+00      | 0.0E+00   | 9.9E-01   | 0.0E+00      |
| SBS2               | <i>TP53</i>           | 0          | 8        | 4         | 0        | 41.346 | 184.17 | 1.7E-09   | 2.1E-08 | 3.1E-14      | 1.7E-05   | 4.1E-04   | 3.1E-10      |
| SBS2               | <i>C16orf92</i>       | 0          | 3        | 0         | 0        | 62.912 | 0      | 2.7E-05   | 8.7E-01 | 1.5E-04      | 1.8E-01   | 9.9E-01   | 6.2E-01      |
| SBS3               | <i>TP53</i>           | 4          | 85       | 13        | 19       | 102.26 | 356.17 | 0.0E+00   | 0.0E+00 | 0.0E+00      | 0.0E+00   | 0.0E+00   | 0.0E+00      |
| SBS3               | <i>KRAS</i>           | 1          | 38       | 0         | 0        | 124.88 | 0      | 0.0E+00   | 8.0E-01 | 0.0E+00      | 0.0E+00   | 9.3E-01   | 0.0E+00      |
| SBS3               | <i>VHL</i>            | 1          | 9        | 2         | 2        | 27.806 | 164.49 | 2.0E-09   | 2.2E-08 | 2.6E-14      | 1.0E-05   | 2.3E-04   | 1.7E-10      |
| SBS3               | <i>SOCS1</i>          | 1          | 10       | 0         | 0        | 33.279 | 0      | 6.5E-11   | 9.0E-01 | 5.3E-10      | 4.3E-07   | 9.3E-01   | 2.7E-06      |
| SBS3               | <i>PTEN</i>           | 0          | 10       | 0         | 1        | 17.8   | 15.505 | 3.3E-08   | 6.1E-02 | 7.9E-08      | 1.0E-04   | 9.3E-01   | 3.2E-04      |
| SBS3               | <i>BCL2</i>           | 1          | 9        | 0         | 0        | 20.594 | 0      | 2.6E-08   | 8.4E-01 | 1.8E-07      | 1.0E-04   | 9.3E-01   | 4.6E-04      |
| SBS3               | <i>PIK3CA</i>         | 1          | 15       | 0         | 0        | 10.596 | 0      | 3.6E-08   | 5.9E-01 | 1.8E-07      | 1.0E-04   | 9.3E-01   | 4.6E-04      |
| SBS3               | <i>HIST1H1E</i>       | 1          | 9        | 1         | 0        | 13.415 | 38.865 | 8.9E-07   | 2.2E-02 | 7.4E-07      | 2.0E-03   | 9.3E-01   | 1.5E-03      |
| SBS3               | <i>ACTB</i>           | 1          | 10       | 0         | 0        | 12.56  | 0      | 5.2E-07   | 7.4E-01 | 3.0E-06      | 1.3E-03   | 9.3E-01   | 5.5E-03      |
| SBS3               | <i>IGLL5</i>          | 1          | 7        | 0         | 1        | 15.121 | 28.218 | 4.4E-06   | 3.1E-02 | 4.3E-06      | 8.9E-03   | 9.3E-01   | 7.1E-03      |
| SBS3               | <i>TNFRSF18</i>       | 0          | 6        | 0         | 0        | 19.105 | 0      | 5.5E-06   | 8.3E-01 | 3.1E-05      | 1.0E-02   | 9.3E-01   | 4.8E-02      |

|      |           |    |    |   |   |        |        |         |         |         |         |         |         |
|------|-----------|----|----|---|---|--------|--------|---------|---------|---------|---------|---------|---------|
| SBS3 | ACTG1     | 0  | 9  | 0 | 0 | 10.455 | 0      | 8.3E-06 | 7.1E-01 | 4.3E-05 | 1.4E-02 | 9.3E-01 | 6.1E-02 |
| SBS3 | DUSP2     | 1  | 7  | 0 | 0 | 12.631 | 0      | 1.4E-05 | 7.9E-01 | 7.5E-05 | 2.2E-02 | 9.3E-01 | 9.2E-02 |
| SBS3 | CTNNB1    | 1  | 10 | 0 | 0 | 8.29   | 0      | 1.7E-05 | 6.5E-01 | 8.0E-05 | 2.5E-02 | 9.3E-01 | 9.2E-02 |
| SBS3 | LCE2B     | 0  | 4  | 0 | 0 | 31.087 | 0      | 2.1E-05 | 9.2E-01 | 1.2E-04 | 2.9E-02 | 9.4E-01 | 1.3E-01 |
| SBS3 | HIST1H2AC | 0  | 5  | 0 | 0 | 15.869 | 0      | 6.6E-05 | 8.7E-01 | 3.4E-04 | 8.3E-02 | 9.3E-01 | 3.4E-01 |
| SBS3 | HIST1H3C  | 0  | 5  | 0 | 0 | 15.584 | 0      | 7.2E-05 | 8.7E-01 | 3.7E-04 | 8.5E-02 | 9.3E-01 | 3.4E-01 |
| SBS3 | BRAF      | 0  | 8  | 1 | 0 | 7.718  | 8.0448 | 1.6E-04 | 1.3E-01 | 4.0E-04 | 1.7E-01 | 9.3E-01 | 3.5E-01 |
| SBS3 | HELZ2     | 1  | 13 | 0 | 0 | 5.158  | 0      | 1.9E-04 | 5.8E-01 | 6.9E-04 | 1.9E-01 | 9.3E-01 | 5.8E-01 |
| SBS3 | HIST1H2BC | 0  | 5  | 0 | 0 | 13.28  | 0      | 1.5E-04 | 8.4E-01 | 7.5E-04 | 1.7E-01 | 9.3E-01 | 5.8E-01 |
| SBS4 | TP53      | 1  | 41 | 4 | 5 | 91.555 | 149.26 | 0.0E+00 | 2.1E-14 | 0.0E+00 | 0.0E+00 | 4.1E-10 | 0.0E+00 |
| SBS4 | KRAS      | 0  | 11 | 0 | 0 | 103.28 | 0      | 4.0E-14 | 8.5E-01 | 3.5E-13 | 4.0E-10 | 9.4E-01 | 3.5E-09 |
| SBS4 | KEAP1     | 0  | 7  | 0 | 1 | 21.476 | 30.7   | 9.1E-06 | 3.2E-02 | 1.5E-05 | 4.6E-02 | 9.4E-01 | 3.8E-02 |
| SBS4 | HRAS      | 0  | 4  | 0 | 0 | 61.349 | 0      | 5.3E-06 | 8.9E-01 | 3.1E-05 | 3.5E-02 | 9.4E-01 | 6.8E-02 |
| SBS4 | BCAT1     | 0  | 6  | 0 | 0 | 22.277 | 0      | 2.2E-05 | 7.5E-01 | 1.0E-04 | 8.8E-02 | 9.4E-01 | 1.7E-01 |
| SBS4 | NFE2L2    | 0  | 6  | 0 | 0 | 20.428 | 0      | 3.5E-05 | 7.8E-01 | 1.7E-04 | 1.2E-01 | 9.4E-01 | 2.6E-01 |
| SBS5 | TP53      | 0  | 36 | 1 | 3 | 293.39 | 318.09 | 0.0E+00 | 6.9E-09 | 0.0E+00 | 0.0E+00 | 1.4E-04 | 0.0E+00 |
| SBS5 | IGLL5     | 8  | 21 | 1 | 0 | 43.581 | 24.828 | 0.0E+00 | 3.6E-02 | 0.0E+00 | 0.0E+00 | 9.8E-01 | 0.0E+00 |
| SBS5 | KRAS      | 1  | 13 | 0 | 0 | 104.84 | 0      | 0.0E+00 | 8.8E-01 | 5.6E-16 | 0.0E+00 | 9.8E-01 | 3.7E-12 |
| SBS5 | PIK3CA    | 0  | 19 | 0 | 0 | 46.376 | 0      | 2.0E-14 | 7.7E-01 | 1.4E-13 | 1.0E-10 | 9.8E-01 | 7.2E-10 |
| SBS5 | SPOP      | 0  | 12 | 0 | 0 | 81.561 | 0      | 9.3E-14 | 8.6E-01 | 8.1E-13 | 3.8E-10 | 9.8E-01 | 3.3E-09 |
| SBS5 | PIM1      | 1  | 11 | 1 | 1 | 41.963 | 81.267 | 6.6E-11 | 3.7E-04 | 9.9E-12 | 2.2E-07 | 5.5E-01 | 3.3E-08 |
| SBS5 | BCL2      | 5  | 11 | 0 | 0 | 27.554 | 0      | 1.3E-10 | 8.4E-01 | 1.0E-09 | 3.7E-07 | 9.8E-01 | 2.9E-06 |
| SBS5 | MYC       | 3  | 11 | 0 | 0 | 17.356 | 0      | 4.5E-08 | 7.6E-01 | 2.8E-07 | 1.1E-04 | 9.8E-01 | 6.2E-04 |
| SBS5 | SGK1      | 3  | 7  | 0 | 3 | 11.597 | 45.224 | 5.4E-05 | 7.6E-05 | 6.6E-07 | 5.2E-02 | 1.9E-01 | 1.3E-03 |
| SBS5 | PTEN      | 0  | 6  | 0 | 1 | 31.884 | 54.293 | 3.2E-06 | 1.7E-02 | 3.2E-06 | 5.4E-03 | 9.8E-01 | 5.5E-03 |
| SBS5 | SLC25A32  | 0  | 6  | 0 | 0 | 32.812 | 0      | 2.7E-06 | 8.5E-01 | 1.6E-05 | 5.4E-03 | 9.8E-01 | 2.0E-02 |
| SBS5 | SOCS1     | 2  | 6  | 0 | 0 | 25.351 | 0      | 2.8E-06 | 9.0E-01 | 1.7E-05 | 5.4E-03 | 9.8E-01 | 2.0E-02 |
| SBS5 | ASNA1     | 0  | 5  | 0 | 0 | 44.044 | 0      | 3.0E-06 | 8.9E-01 | 1.8E-05 | 5.4E-03 | 9.8E-01 | 2.0E-02 |
| SBS5 | NUDT13    | 0  | 5  | 0 | 0 | 38.284 | 0      | 6.0E-06 | 8.6E-01 | 3.4E-05 | 9.2E-03 | 9.8E-01 | 3.5E-02 |
| SBS5 | BRAF      | 0  | 7  | 0 | 0 | 22.784 | 0      | 6.8E-06 | 7.9E-01 | 3.5E-05 | 9.7E-03 | 9.8E-01 | 3.5E-02 |
| SBS5 | EPST11    | 0  | 6  | 0 | 0 | 26.485 | 0      | 9.1E-06 | 8.0E-01 | 4.7E-05 | 1.2E-02 | 9.8E-01 | 4.5E-02 |
| SBS5 | HIST1H1E  | 1  | 7  | 0 | 0 | 18.083 | 0      | 1.0E-05 | 8.6E-01 | 5.7E-05 | 1.2E-02 | 9.8E-01 | 5.2E-02 |
| SBS5 | TMSB4X    | 0  | 3  | 0 | 0 | 108.46 | 0      | 1.0E-05 | 9.3E-01 | 5.9E-05 | 1.2E-02 | 9.8E-01 | 5.2E-02 |
| SBS5 | PAX5      | 0  | 5  | 0 | 0 | 32.889 | 0      | 1.2E-05 | 8.6E-01 | 6.8E-05 | 1.4E-02 | 9.8E-01 | 5.7E-02 |
| SBS5 | ALDH9A1   | 1  | 6  | 0 | 0 | 19.793 | 0      | 1.9E-05 | 8.1E-01 | 1.0E-04 | 2.0E-02 | 9.8E-01 | 7.8E-02 |
| SBS5 | TRIM38    | 0  | 4  | 1 | 0 | 24.744 | 67.031 | 1.9E-04 | 1.4E-02 | 1.0E-04 | 1.3E-01 | 9.8E-01 | 7.8E-02 |
| SBS5 | RAPGEFL1  | 0  | 5  | 0 | 0 | 28.636 | 0      | 2.4E-05 | 8.4E-01 | 1.3E-04 | 2.4E-02 | 9.8E-01 | 9.1E-02 |
| SBS5 | NOL9      | 1  | 5  | 1 | 0 | 15.173 | 34.505 | 2.4E-04 | 2.7E-02 | 2.0E-04 | 1.5E-01 | 9.8E-01 | 1.4E-01 |
| SBS5 | SNCB      | 0  | 3  | 0 | 0 | 62.276 | 0      | 5.7E-05 | 9.1E-01 | 3.0E-04 | 5.2E-02 | 9.8E-01 | 1.8E-01 |
| SBS5 | EZH2      | 0  | 5  | 0 | 1 | 16.925 | 29.652 | 2.7E-04 | 3.4E-02 | 3.2E-04 | 1.6E-01 | 9.8E-01 | 1.9E-01 |
| SBS5 | TAOK3     | 0  | 6  | 0 | 0 | 18.007 | 0      | 7.2E-05 | 7.8E-01 | 3.4E-04 | 6.0E-02 | 9.8E-01 | 1.9E-01 |
| SBS5 | CTNNB1    | 0  | 6  | 0 | 0 | 17.882 | 0      | 7.5E-05 | 8.1E-01 | 3.6E-04 | 6.0E-02 | 9.8E-01 | 2.0E-01 |
| SBS5 | IL20RB    | 0  | 4  | 0 | 0 | 31.748 | 0      | 7.4E-05 | 8.7E-01 | 3.7E-04 | 6.0E-02 | 9.8E-01 | 2.0E-01 |
| SBS5 | RUNDC1    | 0  | 5  | 0 | 0 | 22.008 | 0      | 8.2E-05 | 8.6E-01 | 4.1E-04 | 6.3E-02 | 9.8E-01 | 2.1E-01 |
| SBS5 | SF3B1     | 1  | 8  | 0 | 0 | 10.599 | 0      | 1.3E-04 | 7.0E-01 | 5.2E-04 | 9.1E-02 | 9.8E-01 | 2.4E-01 |
| SBS5 | POLR1D    | 0  | 4  | 0 | 0 | 28.823 | 0      | 1.1E-04 | 8.9E-01 | 5.4E-04 | 8.0E-02 | 9.8E-01 | 2.5E-01 |
| SBS5 | NAA30     | 0  | 4  | 0 | 0 | 23.932 | 0      | 2.2E-04 | 8.7E-01 | 1.0E-03 | 1.5E-01 | 9.8E-01 | 4.3E-01 |
| SBS5 | NRAS      | 0  | 3  | 0 | 0 | 39.461 | 0      | 2.3E-04 | 9.0E-01 | 1.1E-03 | 1.5E-01 | 9.8E-01 | 4.4E-01 |
| SBS5 | MYD88     | 0  | 4  | 0 | 0 | 22.478 | 0      | 2.8E-04 | 8.6E-01 | 1.3E-03 | 1.6E-01 | 9.8E-01 | 5.1E-01 |
| SBS5 | SRSF7     | 0  | 4  | 0 | 0 | 22.094 | 0      | 3.0E-04 | 8.2E-01 | 1.3E-03 | 1.7E-01 | 9.8E-01 | 5.1E-01 |
| SBS5 | FOXA1     | 0  | 4  | 0 | 0 | 21.75  | 0      | 3.1E-04 | 8.9E-01 | 1.5E-03 | 1.8E-01 | 9.8E-01 | 5.4E-01 |
| SBS5 | IRF4      | 0  | 4  | 0 | 0 | 21.203 | 0      | 3.5E-04 | 8.5E-01 | 1.6E-03 | 1.9E-01 | 9.8E-01 | 5.7E-01 |
| SBS6 | TP53      | 0  | 23 | 6 | 2 | 24.466 | 113.32 | 0.0E+00 | 1.2E-13 | 0.0E+00 | 0.0E+00 | 2.5E-09 | 0.0E+00 |
| SBS6 | KRAS      | 1  | 12 | 0 | 0 | 77.106 | 0      | 0.0E+00 | 8.5E-01 | 3.3E-16 | 0.0E+00 | 9.6E-01 | 3.3E-12 |
| SBS6 | PIK3CA    | 0  | 17 | 0 | 0 | 19.314 | 0      | 5.2E-13 | 5.4E-01 | 3.1E-12 | 3.5E-09 | 9.6E-01 | 2.1E-08 |
| SBS6 | HIST1H1B  | 1  | 8  | 0 | 0 | 19.274 | 0      | 1.1E-07 | 9.7E-01 | 7.8E-07 | 5.7E-04 | 9.7E-01 | 3.1E-03 |
| SBS6 | IGLL5     | 10 | 7  | 1 | 0 | 9.0245 | 22.787 | 4.4E-05 | 3.8E-02 | 3.5E-05 | 1.5E-01 | 9.6E-01 | 8.9E-02 |
| SBS6 | ZNF800    | 0  | 6  | 0 | 0 | 11.704 | 0      | 5.8E-05 | 7.0E-01 | 2.7E-04 | 1.5E-01 | 9.6E-01 | 3.9E-01 |
| SBS6 | HIST1H1E  | 1  | 6  | 0 | 0 | 11.631 | 0      | 5.5E-05 | 9.5E-01 | 2.9E-04 | 1.5E-01 | 9.6E-01 | 3.9E-01 |
| SBS6 | PI15      | 0  | 6  | 0 | 0 | 11.404 | 0      | 6.7E-05 | 7.9E-01 | 3.3E-04 | 1.5E-01 | 9.6E-01 | 4.1E-01 |
| SBS6 | SOX11     | 1  | 7  | 0 | 0 | 9.2272 | 0      | 6.8E-05 | 8.9E-01 | 3.5E-04 | 1.5E-01 | 9.6E-01 | 4.1E-01 |
| SBS6 | HHIP      | 0  | 7  | 0 | 0 | 8.8668 | 0      | 9.6E-05 | 7.4E-01 | 4.6E-04 | 1.9E-01 | 9.6E-01 | 4.7E-01 |
| SBS7 | BRAF      | 2  | 44 | 0 | 0 | 22.713 | 0      | 0.0E+00 | 4.8E-01 | 0.0E+00 | 0.0E+00 | 9.3E-01 | 0.0E+00 |
| SBS7 | NRAS      | 0  | 21 | 0 | 0 | 106.42 | 0      | 0.0E+00 | 8.5E-01 | 0.0E+00 | 0.0E+00 | 9.3E-01 | 0.0E+00 |

|       |                      |   |    |   |   |        |        |         |         |         |         |         |         |
|-------|----------------------|---|----|---|---|--------|--------|---------|---------|---------|---------|---------|---------|
| SBS7  | <i>CDKN2A.p14arf</i> | 2 | 12 | 0 | 3 | 16.153 | 67.198 | 4.0E-08 | 2.3E-05 | 5.0E-10 | 2.7E-04 | 1.2E-01 | 2.5E-06 |
| SBS7  | <i>TP53</i>          | 1 | 13 | 4 | 1 | 10.916 | 47.824 | 2.5E-06 | 6.8E-07 | 3.9E-09 | 1.2E-02 | 6.8E-03 | 1.6E-05 |
| SBS7  | <i>SERPINB3</i>      | 1 | 14 | 1 | 0 | 9.2604 | 5.6872 | 7.4E-06 | 1.9E-01 | 3.8E-05 | 3.0E-02 | 9.3E-01 | 1.1E-01 |
| SBS7  | <i>EMB</i>           | 1 | 8  | 1 | 0 | 11.749 | 9.5455 | 3.7E-05 | 1.1E-01 | 1.1E-04 | 1.2E-01 | 9.3E-01 | 2.8E-01 |
| SBS8  | <i>TP53</i>          | 0 | 21 | 1 | 5 | 155.11 | 329.52 | 0.0E+00 | 1.1E-13 | 0.0E+00 | 0.0E+00 | 2.2E-09 | 0.0E+00 |
| SBS8  | <i>KRAS</i>          | 0 | 31 | 0 | 0 | 427.75 | 0      | 0.0E+00 | 8.8E-01 | 0.0E+00 | 0.0E+00 | 9.8E-01 | 0.0E+00 |
| SBS8  | <i>VHL</i>           | 0 | 5  | 1 | 2 | 70.301 | 457.25 | 2.6E-08 | 4.0E-08 | 1.3E-13 | 1.3E-04 | 4.1E-04 | 8.4E-10 |
| SBS8  | <i>MYC</i>           | 1 | 8  | 0 | 0 | 38.354 | 0      | 3.9E-10 | 8.5E-01 | 3.1E-09 | 2.6E-06 | 9.8E-01 | 1.6E-05 |
| SBS8  | <i>CD80</i>          | 0 | 5  | 0 | 0 | 41.805 | 0      | 3.5E-07 | 8.7E-01 | 2.3E-06 | 1.4E-03 | 9.8E-01 | 9.1E-03 |
| SBS8  | <i>H3F3B</i>         | 0 | 4  | 0 | 0 | 68.007 | 0      | 6.4E-07 | 9.1E-01 | 4.1E-06 | 2.1E-03 | 9.8E-01 | 1.0E-02 |
| SBS8  | <i>PASD1</i>         | 1 | 7  | 0 | 0 | 17.162 | 0      | 9.7E-07 | 7.4E-01 | 5.7E-06 | 2.8E-03 | 9.8E-01 | 1.3E-02 |
| SBS8  | <i>IGLL5</i>         | 1 | 4  | 0 | 0 | 48.516 | 0      | 2.4E-06 | 9.0E-01 | 1.5E-05 | 6.1E-03 | 9.8E-01 | 3.0E-02 |
| SBS8  | <i>RRAGC</i>         | 0 | 4  | 0 | 0 | 31.029 | 0      | 1.5E-05 | 8.7E-01 | 8.5E-05 | 3.4E-02 | 9.8E-01 | 1.6E-01 |
| SBS8  | <i>BRAF</i>          | 0 | 5  | 0 | 0 | 17.203 | 0      | 2.8E-05 | 7.7E-01 | 1.5E-04 | 5.6E-02 | 9.8E-01 | 2.1E-01 |
| SBS8  | <i>EEF1A1</i>        | 0 | 5  | 0 | 0 | 15.953 | 0      | 4.0E-05 | 8.0E-01 | 2.1E-04 | 7.4E-02 | 9.8E-01 | 2.8E-01 |
| SBS8  | <i>HIST1H1C</i>      | 0 | 4  | 0 | 0 | 23.502 | 0      | 4.6E-05 | 8.9E-01 | 2.5E-04 | 7.8E-02 | 9.8E-01 | 3.1E-01 |
| SBS8  | <i>CTNNB1</i>        | 0 | 5  | 0 | 0 | 15.177 | 0      | 5.1E-05 | 7.9E-01 | 2.6E-04 | 7.9E-02 | 9.8E-01 | 3.1E-01 |
| SBS8  | <i>FCRL3</i>         | 0 | 5  | 0 | 0 | 14.617 | 0      | 6.2E-05 | 7.6E-01 | 3.1E-04 | 8.8E-02 | 9.8E-01 | 3.4E-01 |
| SBS8  | <i>LRRN4CL</i>       | 0 | 3  | 0 | 0 | 41.334 | 0      | 6.8E-05 | 9.3E-01 | 3.6E-04 | 9.1E-02 | 9.8E-01 | 3.8E-01 |
| SBS8  | <i>NELFA</i>         | 0 | 4  | 0 | 0 | 20.28  | 0      | 8.4E-05 | 8.4E-01 | 4.3E-04 | 1.0E-01 | 9.8E-01 | 4.2E-01 |
| SBS8  | <i>OR6F1</i>         | 0 | 4  | 0 | 0 | 19.403 | 0      | 1.0E-04 | 8.8E-01 | 5.1E-04 | 1.1E-01 | 9.8E-01 | 4.3E-01 |
| SBS8  | <i>MEF2B</i>         | 0 | 3  | 0 | 0 | 36.351 | 0      | 1.0E-04 | 8.9E-01 | 5.1E-04 | 1.1E-01 | 9.8E-01 | 4.3E-01 |
| SBS8  | <i>NUDT21</i>        | 0 | 3  | 0 | 0 | 35.075 | 0      | 1.1E-04 | 8.7E-01 | 5.7E-04 | 1.2E-01 | 9.8E-01 | 4.5E-01 |
| SBS8  | <i>MEF2BNB-MEF2L</i> | 0 | 3  | 0 | 0 | 34.74  | 0      | 1.2E-04 | 8.9E-01 | 5.9E-04 | 1.2E-01 | 9.8E-01 | 4.5E-01 |
| SBS8  | <i>ZNF107</i>        | 0 | 5  | 0 | 0 | 11.59  | 0      | 1.9E-04 | 7.4E-01 | 8.6E-04 | 1.8E-01 | 9.8E-01 | 6.1E-01 |
| SBS8  | <i>ATF1</i>          | 0 | 3  | 0 | 0 | 28.318 | 0      | 2.2E-04 | 8.6E-01 | 1.0E-03 | 2.0E-01 | 9.8E-01 | 7.2E-01 |
| SBS9  | <i>B2M</i>           | 0 | 7  | 3 | 0 | 156.9  | 644.66 | 3.0E-10 | 5.1E-08 | 2.0E-13 | 2.0E-06 | 5.1E-04 | 4.1E-09 |
| SBS9  | <i>IGLL5</i>         | 2 | 9  | 0 | 1 | 100.22 | 149.29 | 2.2E-11 | 6.0E-03 | 2.1E-11 | 4.5E-07 | 9.9E-01 | 1.4E-07 |
| SBS9  | <i>TP53</i>          | 0 | 6  | 1 | 0 | 254.99 | 373.62 | 1.4E-10 | 1.7E-03 | 6.8E-11 | 1.4E-06 | 9.9E-01 | 3.4E-07 |
| SBS9  | <i>SOCS1</i>         | 0 | 4  | 0 | 0 | 172.38 | 0      | 1.8E-07 | 9.8E-01 | 1.2E-06 | 9.0E-04 | 9.9E-01 | 4.9E-03 |
| SBS9  | <i>SPOP</i>          | 0 | 4  | 0 | 0 | 91.15  | 0      | 2.2E-06 | 9.2E-01 | 1.3E-05 | 9.0E-03 | 9.9E-01 | 3.9E-02 |
| SBS9  | <i>RHOA</i>          | 0 | 3  | 0 | 0 | 165.15 | 0      | 3.4E-06 | 9.6E-01 | 2.1E-05 | 1.2E-02 | 9.9E-01 | 5.2E-02 |
| SBS9  | <i>ACTB</i>          | 0 | 4  | 0 | 0 | 74.498 | 0      | 4.9E-06 | 9.4E-01 | 2.9E-05 | 1.4E-02 | 9.9E-01 | 6.5E-02 |
| SBS9  | <i>EZH2</i>          | 0 | 5  | 0 | 0 | 39.175 | 0      | 1.5E-05 | 8.6E-01 | 7.9E-05 | 3.8E-02 | 9.9E-01 | 1.4E-01 |
| SBS9  | <i>GEMIN2</i>        | 0 | 3  | 0 | 0 | 89.862 | 0      | 2.2E-05 | 9.1E-01 | 1.2E-04 | 4.8E-02 | 9.9E-01 | 2.0E-01 |
| SBS9  | <i>BCR</i>           | 0 | 4  | 0 | 0 | 36.902 | 0      | 6.9E-05 | 9.0E-01 | 3.5E-04 | 1.3E-01 | 9.9E-01 | 3.6E-01 |
| SBS9  | <i>MYD88</i>         | 0 | 3  | 0 | 0 | 61.063 | 0      | 6.8E-05 | 9.3E-01 | 3.6E-04 | 1.3E-01 | 9.9E-01 | 3.6E-01 |
| SBS9  | <i>P2RY8</i>         | 0 | 3  | 0 | 0 | 59.19  | 0      | 7.5E-05 | 9.5E-01 | 3.9E-04 | 1.3E-01 | 9.9E-01 | 3.6E-01 |
| SBS10 | <i>TP53</i>          | 0 | 4  | 1 | 0 | 66.72  | 110.26 | 8.4E-07 | 6.8E-03 | 1.9E-07 | 9.0E-03 | 9.9E-01 | 3.9E-03 |
| SBS10 | <i>PIK3CA</i>        | 0 | 6  | 0 | 0 | 24.886 | 0      | 9.0E-07 | 7.2E-01 | 5.2E-06 | 9.0E-03 | 9.9E-01 | 5.2E-02 |
| SBS11 | <i>BRAF</i>          | 0 | 10 | 0 | 0 | 62.794 | 0      | 4.3E-11 | 8.2E-01 | 3.2E-10 | 8.5E-07 | 9.9E-01 | 6.4E-06 |
| SBS12 | <i>TP53</i>          | 0 | 14 | 0 | 1 | 127.1  | 113.37 | 0.0E+00 | 6.5E-03 | 0.0E+00 | 0.0E+00 | 9.9E-01 | 0.0E+00 |
| SBS12 | <i>CTNNB1</i>        | 0 | 10 | 0 | 0 | 33.275 | 0      | 2.7E-11 | 8.3E-01 | 2.2E-10 | 2.7E-07 | 9.9E-01 | 2.2E-06 |
| SBS12 | <i>PIK3CA</i>        | 1 | 7  | 0 | 0 | 17.056 | 0      | 1.2E-06 | 8.1E-01 | 7.0E-06 | 7.7E-03 | 9.9E-01 | 4.7E-02 |
| SBS13 | <i>PIK3CA</i>        | 0 | 17 | 0 | 0 | 30.875 | 0      | 0.0E+00 | 7.4E-01 | 3.3E-16 | 0.0E+00 | 9.8E-01 | 6.7E-12 |
| SBS13 | <i>TP53</i>          | 0 | 7  | 4 | 0 | 26.16  | 119.46 | 5.0E-08 | 5.9E-08 | 5.1E-13 | 5.0E-04 | 1.2E-03 | 5.1E-09 |
| SBS13 | <i>FGFR3</i>         | 0 | 6  | 0 | 0 | 18.819 | 0      | 2.7E-06 | 8.0E-01 | 1.6E-05 | 1.8E-02 | 9.8E-01 | 6.8E-02 |
| SBS13 | <i>DNTTIP1</i>       | 0 | 5  | 0 | 0 | 23.649 | 0      | 5.3E-06 | 7.8E-01 | 3.0E-05 | 2.6E-02 | 9.8E-01 | 1.0E-01 |
| SBS13 | <i>NFE2L2</i>        | 0 | 6  | 0 | 0 | 11.902 | 0      | 3.6E-05 | 7.2E-01 | 1.8E-04 | 1.5E-01 | 9.8E-01 | 4.1E-01 |
| SBS15 | <i>KRAS</i>          | 0 | 7  | 0 | 0 | 153.41 | 0      | 1.1E-11 | 9.4E-01 | 9.4E-11 | 2.2E-07 | 9.9E-01 | 1.9E-06 |
| SBS15 | <i>TP53</i>          | 0 | 6  | 0 | 2 | 41.457 | 182.6  | 4.7E-07 | 7.5E-05 | 7.4E-09 | 4.7E-03 | 5.0E-01 | 7.4E-05 |
| SBS15 | <i>PIM1</i>          | 2 | 5  | 1 | 0 | 22.013 | 120.17 | 2.4E-05 | 6.5E-03 | 6.2E-06 | 9.8E-02 | 9.9E-01 | 4.1E-02 |
| SBS15 | <i>SRP72</i>         | 0 | 5  | 0 | 0 | 31.744 | 0      | 1.1E-05 | 8.7E-01 | 5.9E-05 | 7.1E-02 | 9.9E-01 | 2.4E-01 |
| SBS15 | <i>TOP2B</i>         | 1 | 7  | 0 | 0 | 15.267 | 0      | 2.2E-05 | 7.7E-01 | 1.1E-04 | 9.8E-02 | 9.9E-01 | 3.4E-01 |
| SBS15 | <i>BTG2</i>          | 0 | 3  | 0 | 0 | 66.216 | 0      | 4.0E-05 | 9.7E-01 | 2.2E-04 | 1.3E-01 | 9.9E-01 | 5.4E-01 |
| SBS15 | <i>SLC30A2</i>       | 0 | 4  | 0 | 0 | 32.954 | 0      | 5.0E-05 | 9.1E-01 | 2.7E-04 | 1.4E-01 | 9.9E-01 | 5.9E-01 |
| SBS15 | <i>CDRT15L2</i>      | 0 | 3  | 0 | 0 | 56.405 | 0      | 6.5E-05 | 9.6E-01 | 3.4E-04 | 1.6E-01 | 9.9E-01 | 6.3E-01 |
| SBS16 | <i>TP53</i>          | 0 | 36 | 9 | 5 | 128.69 | 526.75 | 0.0E+00 | 0.0E+00 | 0.0E+00 | 0.0E+00 | 0.0E+00 | 0.0E+00 |
| SBS16 | <i>CTNNB1</i>        | 3 | 45 | 1 | 0 | 45.936 | 13.061 | 0.0E+00 | 7.1E-02 | 0.0E+00 | 0.0E+00 | 9.7E-01 | 0.0E+00 |
| SBS16 | <i>KRAS</i>          | 0 | 8  | 0 | 0 | 37.257 | 0      | 4.0E-10 | 8.6E-01 | 3.1E-09 | 2.7E-06 | 9.7E-01 | 1.6E-05 |
| SBS16 | <i>NFE2L2</i>        | 0 | 10 | 1 | 0 | 17.351 | 28.001 | 6.3E-09 | 3.1E-02 | 6.8E-09 | 3.1E-05 | 9.7E-01 | 2.7E-05 |
| SBS16 | <i>PIK3CA</i>        | 0 | 12 | 0 | 0 | 11.029 | 0      | 4.2E-08 | 6.8E-01 | 2.6E-07 | 1.7E-04 | 9.7E-01 | 8.6E-04 |
| SBS16 | <i>CAMK1</i>         | 0 | 5  | 1 | 0 | 20.204 | 39.149 | 1.1E-05 | 2.1E-02 | 5.7E-06 | 3.2E-02 | 9.7E-01 | 1.4E-02 |
| SBS16 | <i>SF3B1</i>         | 1 | 10 | 0 | 0 | 7.4962 | 0      | 1.0E-05 | 6.4E-01 | 5.1E-05 | 3.2E-02 | 9.7E-01 | 9.3E-02 |

|       |             |   |    |   |   |        |        |         |         |         |         |         |         |
|-------|-------------|---|----|---|---|--------|--------|---------|---------|---------|---------|---------|---------|
| SBS16 | <i>RHOA</i> | 0 | 4  | 0 | 0 | 28.807 | 0      | 1.9E-05 | 8.9E-01 | 1.0E-04 | 4.7E-02 | 9.7E-01 | 1.7E-01 |
| SBS17 | <i>TP53</i> | 0 | 14 | 4 | 2 | 182.46 | 1414.9 | 6.3E-15 | 3.4E-14 | 0.0E+00 | 1.3E-10 | 6.8E-10 | 0.0E+00 |
| SBS17 | <i>IVL</i>  | 0 | 10 | 0 | 0 | 35.087 | 0      | 5.0E-06 | 9.0E-01 | 2.7E-05 | 5.0E-02 | 9.9E-01 | 1.8E-01 |

**Supplementary Table 5. Evolutionarily distinct mutational processes in individual cancer genomes.** Pairs of mutation signatures with significant (FDR < 0.05, KS test) discordant CCF value distributions are shown. For individual mutation signature pairs, tumor type (with ICGC reference ID), mutation signatures, mutation numbers, and KS test-related statistics (D value and P value) are listed.

| Tumor type      | ICGC ref. ID                  | Signature (#1 in pairs) | Signature (#2 in pairs) | Signature 1 (mutation no) | Signature 2 (mutation no) | D value (KS test) | P value (KS test) | FDR       |
|-----------------|-------------------------------|-------------------------|-------------------------|---------------------------|---------------------------|-------------------|-------------------|-----------|
| Ovary-AdenoCA   | 0009b464-b376-4fbc-8a56-da53  | SBS1                    | SBS3                    | 813                       | 8901                      | 0.1436121         | 9.03E-14          | 2.19E-12  |
| Ovary-AdenoCA   | 0009b464-b376-4fbc-8a56-da53  | SBS1                    | SBS4                    | 813                       | 252                       | 0.1649241         | 5.70E-05          | 0.0005106 |
| Ovary-AdenoCA   | 0009b464-b376-4fbc-8a56-da53  | SBS2                    | SBS3                    | 1045                      | 8901                      | 0.1067871         | 1.09E-09          | 1.86E-08  |
| Ovary-AdenoCA   | 0009b464-b376-4fbc-8a56-da53  | SBS2                    | SBS4                    | 1045                      | 252                       | 0.1363105         | 0.0010574         | 0.0069149 |
| Lymph-CLL       | 5f53bcda-2fd3-4574-9cc2-5efe3 | SBS1                    | SBS3                    | 427                       | 194                       | 0.1662281         | 0.0012574         | 0.0080149 |
| Lymph-CLL       | 5f53bcda-2fd3-4574-9cc2-5efe3 | SBS1                    | SBS5                    | 427                       | 2412                      | 0.1346468         | 3.87E-06          | 4.29E-05  |
| Eso-AdenoCa     | 5fd632ea-085e-4e9b-8dcc-ec94  | SBS9                    | SBS17                   | 1536                      | 8728                      | 0.0481126         | 0.00473           | 0.0246002 |
| Panc-AdenoCA    | 09cb8bc5-13ac-44ac-9b7d-6de1  | SBS1                    | SBS6                    | 5710                      | 1335                      | 0.1229665         | 1.23E-14          | 3.22E-13  |
| Panc-AdenoCA    | 09cb8bc5-13ac-44ac-9b7d-6de1  | SBS1                    | SBS13                   | 5710                      | 567                       | 0.083272          | 0.0015648         | 0.0096715 |
| Panc-AdenoCA    | 09cb8bc5-13ac-44ac-9b7d-6de1  | SBS6                    | SBS13                   | 1335                      | 567                       | 0.0917781         | 0.0024509         | 0.0141697 |
| Panc-Endocrine  | 606d7f5e-ff98-4245-a9ac-281f5 | SBS2                    | SBS7                    | 1173                      | 413                       | 0.1599281         | 3.27E-07          | 4.25E-06  |
| Panc-Endocrine  | 606d7f5e-ff98-4245-a9ac-281f5 | SBS2                    | SBS13                   | 1173                      | 1436                      | 0.0705444         | 0.0032382         | 0.017943  |
| Panc-Endocrine  | 606d7f5e-ff98-4245-a9ac-281f5 | SBS2                    | SBS16                   | 1173                      | 916                       | 0.2333527         | 0                 | 0         |
| Panc-Endocrine  | 606d7f5e-ff98-4245-a9ac-281f5 | SBS7                    | SBS13                   | 413                       | 1436                      | 0.0924565         | 0.008308          | 0.0392064 |
| Panc-Endocrine  | 606d7f5e-ff98-4245-a9ac-281f5 | SBS13                   | SBS16                   | 1436                      | 916                       | 0.1709929         | 1.25E-14          | 3.26E-13  |
| Biliary-AdenoCA | 60f81dba-c623-11e3-bf01-24c6  | SBS2                    | SBS5                    | 794                       | 728                       | 0.1298994         | 5.43E-06          | 5.84E-05  |
| Biliary-AdenoCA | 60f81dba-c623-11e3-bf01-24c6  | SBS2                    | SBS8                    | 794                       | 2577                      | 0.0750946         | 0.0021278         | 0.0125566 |
| Biliary-AdenoCA | 60f81dba-c623-11e3-bf01-24c6  | SBS2                    | SBS12                   | 794                       | 672                       | 0.1162776         | 0.0001064         | 0.0008899 |
| Liver-HCC       | 6172ca02-c622-11e3-bf01-24c6  | SBS4                    | SBS16                   | 2067                      | 1532                      | 0.0567554         | 0.0069067         | 0.0335798 |
| Liver-HCC       | 6172ca02-c622-11e3-bf01-24c6  | SBS8                    | SBS16                   | 889                       | 1532                      | 0.0752973         | 0.0033935         | 0.0186392 |
| Prost-AdenoCA   | 61a48c69-4f7d-4dc6-aff7-88a6  | SBS1                    | SBS16                   | 1600                      | 3060                      | 0.1689297         | 0                 | 0         |
| Prost-AdenoCA   | 61d941f1-87df-43af-8a29-b680  | SBS1                    | SBS8                    | 1337                      | 348                       | 0.1102077         | 0.0024433         | 0.0141507 |
| Prost-AdenoCA   | 6218f366-d5d2-4289-a95e-eeed  | SBS1                    | SBS3                    | 2328                      | 244                       | 0.1196975         | 0.0035694         | 0.0195194 |
| Prost-AdenoCA   | 6218f366-d5d2-4289-a95e-eeed  | SBS1                    | SBS9                    | 2328                      | 652                       | 0.1301125         | 6.48E-08          | 9.14E-07  |
| Prost-AdenoCA   | 6218f366-d5d2-4289-a95e-eeed  | SBS1                    | SBS16                   | 2328                      | 1413                      | 0.0873863         | 2.94E-06          | 3.33E-05  |
| Prost-AdenoCA   | 6218f366-d5d2-4289-a95e-eeed  | SBS4                    | SBS9                    | 2239                      | 652                       | 0.1035355         | 3.98E-05          | 0.0003686 |
| Prost-AdenoCA   | 6218f366-d5d2-4289-a95e-eeed  | SBS4                    | SBS16                   | 2239                      | 1413                      | 0.0665049         | 0.0009397         | 0.0061992 |
| Lymph-BNHL      | 626c9788-d70c-449b-b9dc-5e3f  | SBS5                    | SBS6                    | 3773                      | 1032                      | 0.0660474         | 0.0017006         | 0.0103877 |
| Lymph-BNHL      | 626c9788-d70c-449b-b9dc-5e3f  | SBS6                    | SBS11                   | 1032                      | 2286                      | 0.06757           | 0.0030292         | 0.0169502 |
| Liver-HCC       | 63fef3fe-c622-11e3-bf01-24c6  | SBS4                    | SBS16                   | 4851                      | 27185                     | 0.0710508         | 0                 | 0         |
| Eso-AdenoCa     | 64623aaa-a274-4baa-8b71-958c  | SBS1                    | SBS3                    | 2342                      | 23756                     | 0.0843039         | 1.38E-13          | 3.28E-12  |
| Eso-AdenoCa     | 64623aaa-a274-4baa-8b71-958c  | SBS1                    | SBS13                   | 2342                      | 9261                      | 0.3435987         | 0                 | 0         |
| Eso-AdenoCa     | 64623aaa-a274-4baa-8b71-958c  | SBS1                    | SBS14                   | 2342                      | 1717                      | 0.0676169         | 0.0002327         | 0.0018025 |
| Eso-AdenoCa     | 64623aaa-a274-4baa-8b71-958c  | SBS1                    | SBS16                   | 2342                      | 699                       | 0.0933883         | 0.0001671         | 0.0013359 |
| Eso-AdenoCa     | 64623aaa-a274-4baa-8b71-958c  | SBS1                    | SBS17                   | 2342                      | 16433                     | 0.0447075         | 0.0005524         | 0.0039164 |
| Eso-AdenoCa     | 64623aaa-a274-4baa-8b71-958c  | SBS3                    | SBS13                   | 23756                     | 9261                      | 0.269368          | 0                 | 0         |
| Eso-AdenoCa     | 64623aaa-a274-4baa-8b71-958c  | SBS3                    | SBS17                   | 23756                     | 16433                     | 0.1121823         | 0                 | 0         |
| Eso-AdenoCa     | 64623aaa-a274-4baa-8b71-958c  | SBS13                   | SBS14                   | 9261                      | 1717                      | 0.2966002         | 0                 | 0         |
| Eso-AdenoCa     | 64623aaa-a274-4baa-8b71-958c  | SBS13                   | SBS16                   | 9261                      | 699                       | 0.3101673         | 0                 | 0         |
| Eso-AdenoCa     | 64623aaa-a274-4baa-8b71-958c  | SBS13                   | SBS17                   | 9261                      | 16433                     | 0.3765405         | 0                 | 0         |
| Eso-AdenoCa     | 64623aaa-a274-4baa-8b71-958c  | SBS14                   | SBS17                   | 1717                      | 16433                     | 0.0924649         | 5.71E-12          | 1.16E-10  |
| Eso-AdenoCa     | 64623aaa-a274-4baa-8b71-958c  | SBS16                   | SBS17                   | 699                       | 16433                     | 0.0889586         | 4.92E-05          | 0.000446  |
| Eso-AdenoCa     | 6495e68e-1434-45d3-a03d-f28e  | SBS1                    | SBS5                    | 9660                      | 528                       | 0.0945535         | 0.000259          | 0.0019869 |
| Eso-AdenoCa     | 6495e68e-1434-45d3-a03d-f28e  | SBS1                    | SBS17                   | 9660                      | 5412                      | 0.1133203         | 0                 | 0         |
| Eso-AdenoCa     | 6495e68e-1434-45d3-a03d-f28e  | SBS5                    | SBS17                   | 528                       | 5412                      | 0.2029287         | 0                 | 0         |
| Stomach-AdenoCA | 65be412d-46c3-4cbf-9b46-b353  | SBS1                    | SBS5                    | 4601                      | 5043                      | 0.0495794         | 1.46E-05          | 0.0001456 |
| Panc-AdenoCA    | 65d2dbc3-a163-4696-b246-47a4  | SBS1                    | SBS13                   | 4327                      | 638                       | 0.0863485         | 0.0005013         | 0.003603  |
| Panc-AdenoCA    | 65d2dbc3-a163-4696-b246-47a4  | SBS1                    | SBS17                   | 4327                      | 482                       | 0.0937585         | 0.0009764         | 0.0064273 |
| Panc-AdenoCA    | 65d2dbc3-a163-4696-b246-47a4  | SBS6                    | SBS13                   | 792                       | 638                       | 0.0886015         | 0.0077919         | 0.0372146 |
| Panc-AdenoCA    | 65d2dbc3-a163-4696-b246-47a4  | SBS6                    | SBS17                   | 792                       | 482                       | 0.0960958         | 0.0079001         | 0.0376213 |
| Ovary-AdenoCA   | 669f0e01-28f6-4ed8-bdb5-73f8  | SBS1                    | SBS3                    | 439                       | 7392                      | 0.1479353         | 2.65E-08          | 3.91E-07  |
| Ovary-AdenoCA   | 669f0e01-28f6-4ed8-bdb5-73f8  | SBS1                    | SBS13                   | 439                       | 751                       | 0.2436296         | 1.04E-14          | 2.75E-13  |
| Ovary-AdenoCA   | 669f0e01-28f6-4ed8-bdb5-73f8  | SBS3                    | SBS13                   | 7392                      | 751                       | 0.109318          | 1.68E-07          | 2.29E-06  |
| Panc-AdenoCA    | 0b29c893-03bf-4131-b192-c14a  | SBS1                    | SBS3                    | 11181                     | 919                       | 0.0875202         | 4.48E-06          | 4.88E-05  |
| Panc-AdenoCA    | 0b29c893-03bf-4131-b192-c14a  | SBS1                    | SBS13                   | 11181                     | 660                       | 0.068507          | 0.0057613         | 0.0289079 |

|                 |                                      |       |        |       |           |           |           |
|-----------------|--------------------------------------|-------|--------|-------|-----------|-----------|-----------|
| Panc-AdenoCA    | 0b29c893-03bf-4131-b192-c14a: SBS1   | SBS17 | 11181  | 6804  | 0.2431854 | 0         | 0         |
| Panc-AdenoCA    | 0b29c893-03bf-4131-b192-c14a: SBS3   | SBS13 | 919    | 660   | 0.1473225 | 1.15E-07  | 1.59E-06  |
| Panc-AdenoCA    | 0b29c893-03bf-4131-b192-c14a: SBS3   | SBS17 | 919    | 6804  | 0.1776762 | 0         | 0         |
| Panc-AdenoCA    | 0b29c893-03bf-4131-b192-c14a: SBS13  | SBS17 | 660    | 6804  | 0.3095639 | 0         | 0         |
| Liver-HCC       | 67189cd8-c623-11e3-bf01-24c6: SBS5   | SBS11 | 4626   | 1213  | 0.0644198 | 0.0006871 | 0.0047008 |
| Lymph-CLL       | 0b6cd7df-6970-4d60-b7b5-8500: SBS1   | SBS9  | 513    | 1871  | 0.2090906 | 9.99E-16  | 2.89E-14  |
| Stomach-AdenoCA | 68509ede-3dcf-4a6e-9af0-4a9bt SBS1   | SBS17 | 3498   | 6521  | 0.0404201 | 0.0011753 | 0.0075625 |
| Stomach-AdenoCA | 68509ede-3dcf-4a6e-9af0-4a9bt SBS2   | SBS17 | 1521   | 6521  | 0.0535495 | 0.0016949 | 0.0103628 |
| Stomach-AdenoCA | 68509ede-3dcf-4a6e-9af0-4a9bt SBS15  | SBS17 | 682    | 6521  | 0.0682919 | 0.006308  | 0.0310544 |
| Liver-HCC       | 690e481c-c623-11e3-bf01-24c6: SBS3   | SBS4  | 7666   | 3177  | 0.0431454 | 0.0004669 | 0.003383  |
| Liver-HCC       | 690e481c-c623-11e3-bf01-24c6: SBS3   | SBS16 | 7666   | 6919  | 0.035823  | 0.0001768 | 0.0014005 |
| Eso-AdenoCa     | 6a0d0c42-1884-4c6a-936a-678a SBS8    | SBS12 | 11403  | 879   | 0.0654872 | 0.0018242 | 0.0110033 |
| Eso-AdenoCa     | 6a0d0c42-1884-4c6a-936a-678a SBS8    | SBS17 | 11403  | 23494 | 0.0727844 | 0         | 0         |
| Liver-HCC       | 6a129b50-c623-11e3-bf01-24c6: SBS3   | SBS4  | 971    | 3857  | 0.0610916 | 0.0061147 | 0.0303891 |
| Liver-HCC       | 6a129b50-c623-11e3-bf01-24c6: SBS3   | SBS12 | 971    | 7370  | 0.0682326 | 0.0006785 | 0.0046571 |
| Kidney-RCC      | 6bd4bca3-e568-4d1b-8b42-401f: SBS5   | SBS8  | 3325   | 3717  | 0.0386101 | 0.010679  | 0.0479063 |
| Lymph-CLL       | 6cfce053-bfd6-4ca0-b74b-b2e45 SBS1   | SBS9  | 277    | 1576  | 0.1525614 | 3.45E-05  | 0.000324  |
| Lymph-CLL       | 6cfce053-bfd6-4ca0-b74b-b2e45 SBS5   | SBS9  | 1015   | 1576  | 0.1293429 | 2.14E-09  | 3.52E-08  |
| Stomach-AdenoCA | 6dbac113-d4cf-4db5-97c9-50fa4 SBS1   | SBS2  | 1967   | 1463  | 0.224355  | 0         | 0         |
| Stomach-AdenoCA | 6dbac113-d4cf-4db5-97c9-50fa4 SBS1   | SBS3  | 1967   | 333   | 0.207627  | 4.34E-11  | 8.22E-10  |
| Stomach-AdenoCA | 6dbac113-d4cf-4db5-97c9-50fa4 SBS1   | SBS6  | 1967   | 357   | 0.1303269 | 6.97E-05  | 0.0006092 |
| Stomach-AdenoCA | 6dbac113-d4cf-4db5-97c9-50fa4 SBS1   | SBS9  | 1967   | 2514  | 0.2070031 | 0         | 0         |
| Stomach-AdenoCA | 6dbac113-d4cf-4db5-97c9-50fa4 SBS1   | SBS17 | 1967   | 4740  | 0.2581858 | 0         | 0         |
| Stomach-AdenoCA | 6dbac113-d4cf-4db5-97c9-50fa4 SBS2   | SBS6  | 1463   | 357   | 0.1207162 | 0.0004663 | 0.0033825 |
| Stomach-AdenoCA | 6dbac113-d4cf-4db5-97c9-50fa4 SBS6   | SBS9  | 357    | 2514  | 0.1063089 | 0.0017074 | 0.010419  |
| Stomach-AdenoCA | 6dbac113-d4cf-4db5-97c9-50fa4 SBS6   | SBS17 | 357    | 4740  | 0.1627256 | 4.63E-08  | 6.63E-07  |
| Stomach-AdenoCA | 6dbac113-d4cf-4db5-97c9-50fa4 SBS9   | SBS17 | 2514   | 4740  | 0.0571463 | 4.38E-05  | 0.0004005 |
| Panc-Endocrine  | 6e776415-ddf4-4060-953f-08ef2 SBS1   | SBS2  | 1033   | 570   | 0.0902294 | 0.005053  | 0.0259371 |
| Panc-Endocrine  | 6e776415-ddf4-4060-953f-08ef2 SBS1   | SBS3  | 1033   | 8554  | 0.2255567 | 0         | 0         |
| Panc-Endocrine  | 6e776415-ddf4-4060-953f-08ef2 SBS1   | SBS13 | 1033   | 802   | 0.2244522 | 0         | 0         |
| Panc-Endocrine  | 6e776415-ddf4-4060-953f-08ef2 SBS2   | SBS3  | 570    | 8554  | 0.1450139 | 3.47E-10  | 6.23E-09  |
| Panc-Endocrine  | 6e776415-ddf4-4060-953f-08ef2 SBS2   | SBS13 | 570    | 802   | 0.1451809 | 1.59E-06  | 1.89E-05  |
| Ovary-AdenoCA   | 6f981023-4269-4e8e-a4ab-2c92: SBS1   | SBS3  | 576    | 5125  | 0.0857009 | 0.0009947 | 0.0065415 |
| Ovary-AdenoCA   | 6f981023-4269-4e8e-a4ab-2c92: SBS1   | SBS4  | 576    | 878   | 0.1189612 | 0.0001061 | 0.0008888 |
| Ovary-AdenoCA   | 6f981023-4269-4e8e-a4ab-2c92: SBS1   | SBS8  | 576    | 2181  | 0.0848259 | 0.0028393 | 0.0160306 |
| Panc-AdenoCA    | 6fc0cb07-9713-4355-8543-f85d1 SBS1   | SBS3  | 6295   | 3183  | 0.1554449 | 0         | 0         |
| Panc-AdenoCA    | 6fc0cb07-9713-4355-8543-f85d1 SBS1   | SBS9  | 6295   | 2448  | 0.1954053 | 0         | 0         |
| Panc-AdenoCA    | 6fc0cb07-9713-4355-8543-f85d1 SBS1   | SBS10 | 6295   | 664   | 0.2568318 | 0         | 0         |
| Panc-AdenoCA    | 6fc0cb07-9713-4355-8543-f85d1 SBS1   | SBS14 | 6295   | 565   | 0.2860748 | 0         | 0         |
| Panc-AdenoCA    | 6fc0cb07-9713-4355-8543-f85d1 SBS3   | SBS9  | 3183   | 2448  | 0.048218  | 0.0032106 | 0.017806  |
| Panc-AdenoCA    | 6fc0cb07-9713-4355-8543-f85d1 SBS3   | SBS10 | 3183   | 664   | 0.1187933 | 3.69E-07  | 4.78E-06  |
| Panc-AdenoCA    | 6fc0cb07-9713-4355-8543-f85d1 SBS3   | SBS14 | 3183   | 565   | 0.1391886 | 1.69E-08  | 2.55E-07  |
| Panc-AdenoCA    | 6fc0cb07-9713-4355-8543-f85d1 SBS9   | SBS10 | 2448   | 664   | 0.0741692 | 0.0063867 | 0.0313925 |
| Panc-AdenoCA    | 6fc0cb07-9713-4355-8543-f85d1 SBS9   | SBS14 | 2448   | 565   | 0.0946903 | 0.000532  | 0.0038063 |
| Panc-AdenoCA    | 70dd8453-11d3-4105-a8d0-6a7f: SBS1   | SBS6  | 3626   | 401   | 0.0888884 | 0.0066538 | 0.0325266 |
| Panc-AdenoCA    | 70dd8453-11d3-4105-a8d0-6a7f: SBS3   | SBS6  | 465    | 401   | 0.1181991 | 0.0048768 | 0.0252376 |
| Skin-Melanoma   | 72108583-5320-46ec-945f-5ff17: SBS7  | SBS17 | 148647 | 12706 | 0.1039086 | 0         | 0         |
| Skin-Melanoma   | 72108583-5320-46ec-945f-5ff17: SBS11 | SBS17 | 2237   | 12706 | 0.1039915 | 0         | 0         |
| Panc-Endocrine  | 724bf2b8-a246-4b6f-85f8-95824 SBS1   | SBS6  | 5178   | 5931  | 0.0412999 | 0.0001605 | 0.0012867 |
| Kidney-RCC      | 72a27124-24b9-41f7-a065-774fc SBS1   | SBS3  | 368    | 3653  | 0.0895192 | 0.009418  | 0.0433351 |
| Panc-AdenoCA    | 72a5e569-99d4-47bc-be1b-629f: SBS1   | SBS8  | 2922   | 2701  | 0.0526574 | 0.0008329 | 0.0055415 |
| Panc-AdenoCA    | 72f82fbd-9838-4082-b605-bc3df: SBS1  | SBS3  | 7117   | 5045  | 0.0676336 | 3.73E-12  | 7.73E-11  |
| Panc-AdenoCA    | 7410c00d-ed0b-48dc-a4bf-eb76: SBS1   | SBS5  | 3395   | 1068  | 0.057334  | 0.0095803 | 0.043844  |
| Panc-AdenoCA    | 7410c00d-ed0b-48dc-a4bf-eb76: SBS1   | SBS8  | 3395   | 645   | 0.0721193 | 0.0071176 | 0.0344713 |
| Panc-AdenoCA    | 7410c00d-ed0b-48dc-a4bf-eb76: SBS1   | SBS17 | 3395   | 1460  | 0.1301279 | 1.89E-15  | 5.38E-14  |
| Panc-AdenoCA    | 7410c00d-ed0b-48dc-a4bf-eb76: SBS5   | SBS17 | 1068   | 1460  | 0.1000385 | 8.70E-06  | 9.07E-05  |
| Panc-AdenoCA    | 7410c00d-ed0b-48dc-a4bf-eb76: SBS7   | SBS17 | 1123   | 1460  | 0.1242397 | 6.18E-09  | 9.65E-08  |
| Panc-AdenoCA    | 7410c00d-ed0b-48dc-a4bf-eb76: SBS8   | SBS17 | 645    | 1460  | 0.0969364 | 0.0004464 | 0.0032644 |
| Kidney-RCC      | 741c4656-0fd0-416e-86c8-f6533: SBS3  | SBS5  | 3151   | 242   | 0.1666348 | 7.60E-06  | 7.96E-05  |
| Kidney-RCC      | 741c4656-0fd0-416e-86c8-f6533: SBS4  | SBS5  | 1133   | 242   | 0.1825804 | 3.37E-06  | 3.79E-05  |
| Kidney-RCC      | 741c4656-0fd0-416e-86c8-f6533: SBS5  | SBS16 | 242    | 1069  | 0.1651965 | 4.20E-05  | 0.0003863 |
| Ovary-AdenoCA   | 745b8756-0eab-423f-8cde-e0ff1: SBS3  | SBS4  | 6061   | 397   | 0.0886429 | 0.0057289 | 0.0287687 |
| Ovary-AdenoCA   | 745b8756-0eab-423f-8cde-e0ff1: SBS3  | SBS6  | 6061   | 583   | 0.0813522 | 0.0017529 | 0.0106756 |
| Panc-AdenoCA    | 754d26af-f184-497c-856a-cd1e: SBS1   | SBS8  | 2582   | 2156  | 0.0525215 | 0.0030613 | 0.017099  |

|                 |                               |       |       |        |       |           |           |           |
|-----------------|-------------------------------|-------|-------|--------|-------|-----------|-----------|-----------|
| Prost-AdenoCA   | 0bfd1043-7ec1-aaec-e050-11ac  | SBS1  | SBS8  | 2071   | 1269  | 0.0677577 | 0.0014562 | 0.0090715 |
| Biliary-AdenoCA | 760881cc-c623-11e3-bf01-24c6  | SBS6  | SBS15 | 112459 | 11822 | 0.017113  | 0.0038013 | 0.0205189 |
| Head-SCC        | 7625877a-7a2b-466f-944b-9e56  | SBS1  | SBS11 | 1709   | 628   | 0.0808105 | 0.0049673 | 0.0256426 |
| Head-SCC        | 7625877a-7a2b-466f-944b-9e56  | SBS1  | SBS13 | 1709   | 507   | 0.091166  | 0.0030085 | 0.0168796 |
| Eso-AdenoCa     | 77c022d3-2f29-49d3-a1df-cc2e9 | SBS1  | SBS3  | 2395   | 2001  | 0.0893422 | 5.53E-08  | 7.90E-07  |
| Eso-AdenoCa     | 77c022d3-2f29-49d3-a1df-cc2e9 | SBS2  | SBS3  | 1340   | 2001  | 0.1174629 | 4.82E-10  | 8.55E-09  |
| Eso-AdenoCa     | 77c022d3-2f29-49d3-a1df-cc2e9 | SBS3  | SBS17 | 2001   | 940   | 0.1293401 | 1.02E-09  | 1.74E-08  |
| Panc-AdenoCA    | 78100212-65aa-4365-8b64-4b3   | SBS1  | SBS3  | 5049   | 1316  | 0.1300631 | 8.88E-16  | 2.59E-14  |
| Panc-AdenoCA    | 78100212-65aa-4365-8b64-4b3   | SBS1  | SBS9  | 5049   | 1734  | 0.2442301 | 0         | 0         |
| Panc-AdenoCA    | 78100212-65aa-4365-8b64-4b3   | SBS1  | SBS14 | 5049   | 145   | 0.1563874 | 0.0020266 | 0.0120615 |
| Panc-AdenoCA    | 78100212-65aa-4365-8b64-4b3   | SBS3  | SBS9  | 1316   | 1734  | 0.1308639 | 1.49E-11  | 2.89E-10  |
| Prost-AdenoCA   | 0bfd1043-816e-e3e4-e050-11ac  | SBS7  | SBS8  | 1114   | 3330  | 0.0721314 | 0.0003378 | 0.0025443 |
| Prost-AdenoCA   | 0bfd1043-816e-e3e4-e050-11ac  | SBS8  | SBS15 | 3330   | 699   | 0.0821508 | 0.0008212 | 0.0054866 |
| Panc-AdenoCA    | 78103d9b-0b8a-431e-bb58-5c9   | SBS3  | SBS8  | 4153   | 6878  | 0.0380713 | 0.0010991 | 0.0071451 |
| Panc-AdenoCA    | 78103d9b-0b8a-431e-bb58-5c9   | SBS3  | SBS12 | 4153   | 10439 | 0.0718809 | 9.28E-14  | 2.24E-12  |
| Panc-AdenoCA    | 78103d9b-0b8a-431e-bb58-5c9   | SBS8  | SBS12 | 6878   | 10439 | 0.0368543 | 2.57E-05  | 0.000248  |
| Prost-AdenoCA   | 783579bd-e29d-457c-8236-1a8   | SBS1  | SBS3  | 441    | 1903  | 0.0880541 | 0.0077595 | 0.037121  |
| Prost-AdenoCA   | 783579bd-e29d-457c-8236-1a8   | SBS1  | SBS16 | 441    | 1053  | 0.154447  | 7.26E-07  | 8.94E-06  |
| Prost-AdenoCA   | 783579bd-e29d-457c-8236-1a8   | SBS3  | SBS16 | 1903   | 1053  | 0.0731543 | 0.0014124 | 0.0088428 |
| Prost-AdenoCA   | 783579bd-e29d-457c-8236-1a8   | SBS14 | SBS16 | 79     | 1053  | 0.2321156 | 0.0007278 | 0.0049472 |
| Eso-AdenoCa     | 7866dfb2-46b3-42b4-905b-12f8  | SBS1  | SBS5  | 5122   | 1217  | 0.0534222 | 0.0073013 | 0.0352251 |
| Eso-AdenoCa     | 7866dfb2-46b3-42b4-905b-12f8  | SBS1  | SBS6  | 5122   | 2809  | 0.0406175 | 0.0050286 | 0.0258738 |
| Eso-AdenoCa     | 7866dfb2-46b3-42b4-905b-12f8  | SBS5  | SBS6  | 1217   | 2809  | 0.0778133 | 6.84E-05  | 0.000599  |
| Prost-AdenoCA   | 0bfd1043-8170-e3e4-e050-11ac  | SBS1  | SBS3  | 323    | 1174  | 0.1523331 | 1.57E-05  | 0.000156  |
| Prost-AdenoCA   | 0bfd1043-8170-e3e4-e050-11ac  | SBS1  | SBS5  | 323    | 1064  | 0.1099071 | 0.0050265 | 0.0258738 |
| Prost-AdenoCA   | 0bfd1043-8170-e3e4-e050-11ac  | SBS1  | SBS9  | 323    | 1305  | 0.1173719 | 0.0015955 | 0.0098207 |
| Prost-AdenoCA   | 0bfd1043-8170-e3e4-e050-11ac  | SBS1  | SBS10 | 323    | 527   | 0.1749725 | 9.46E-06  | 9.79E-05  |
| Prost-AdenoCA   | 0bfd1043-8170-e3e4-e050-11ac  | SBS3  | SBS5  | 1174   | 1064  | 0.074413  | 0.0041356 | 0.0218901 |
| Prost-AdenoCA   | 0bfd1043-8170-e3e4-e050-11ac  | SBS3  | SBS6  | 1174   | 1202  | 0.0933708 | 6.36E-05  | 0.0005608 |
| Prost-AdenoCA   | 0bfd1043-8170-e3e4-e050-11ac  | SBS3  | SBS9  | 1174   | 1305  | 0.0664552 | 0.0085181 | 0.0399056 |
| Prost-AdenoCA   | 0bfd1043-8170-e3e4-e050-11ac  | SBS5  | SBS10 | 1064   | 527   | 0.0929898 | 0.0045076 | 0.0235411 |
| Prost-AdenoCA   | 0bfd1043-8170-e3e4-e050-11ac  | SBS6  | SBS10 | 1202   | 527   | 0.1183432 | 6.99E-05  | 0.0006098 |
| Prost-AdenoCA   | 0bfd1043-8170-e3e4-e050-11ac  | SBS9  | SBS10 | 1305   | 527   | 0.0963423 | 0.0018815 | 0.0112836 |
| Panc-Endocrine  | 79353875-9d86-4063-a8ea-1d9   | SBS1  | SBS4  | 163    | 536   | 0.1987455 | 0.000103  | 0.0008662 |
| Panc-Endocrine  | 79353875-9d86-4063-a8ea-1d9   | SBS1  | SBS5  | 163    | 1693  | 0.1964024 | 2.09E-05  | 0.0002033 |
| Panc-Endocrine  | 79353875-9d86-4063-a8ea-1d9   | SBS1  | SBS7  | 163    | 326   | 0.291411  | 1.93E-08  | 2.89E-07  |
| Panc-Endocrine  | 79353875-9d86-4063-a8ea-1d9   | SBS5  | SBS7  | 1693   | 326   | 0.1012089 | 0.0073941 | 0.035563  |
| Prost-AdenoCA   | 79914ce9-04d8-4b0d-9f16-2e52  | SBS1  | SBS16 | 1329   | 2713  | 0.0617854 | 0.0022042 | 0.0129466 |
| Eso-AdenoCa     | 7a4f6014-f7a2-459b-bc43-df164 | SBS1  | SBS10 | 11938  | 907   | 0.0573964 | 0.007744  | 0.0370755 |
| Eso-AdenoCa     | 7a4f6014-f7a2-459b-bc43-df164 | SBS1  | SBS17 | 11938  | 5378  | 0.056319  | 1.22E-10  | 2.27E-09  |
| Eso-AdenoCa     | 7a4f6014-f7a2-459b-bc43-df164 | SBS8  | SBS10 | 1830   | 907   | 0.0709979 | 0.0044247 | 0.023224  |
| Eso-AdenoCa     | 7a4f6014-f7a2-459b-bc43-df164 | SBS8  | SBS17 | 1830   | 5378  | 0.0620974 | 5.34E-05  | 0.0004798 |
| Eso-AdenoCa     | 7a4f6014-f7a2-459b-bc43-df164 | SBS10 | SBS15 | 907    | 1640  | 0.0700783 | 0.0064545 | 0.031676  |
| Eso-AdenoCa     | 7a4f6014-f7a2-459b-bc43-df164 | SBS15 | SBS17 | 1640   | 5378  | 0.0603826 | 0.0002094 | 0.0016342 |
| Eso-AdenoCa     | 7adcea71-1aed-450c-b0ff-b9d9  | SBS1  | SBS2  | 8043   | 2678  | 0.0380564 | 0.0059387 | 0.0297267 |
| Eso-AdenoCa     | 7adcea71-1aed-450c-b0ff-b9d9  | SBS1  | SBS17 | 8043   | 7039  | 0.049467  | 2.10E-08  | 3.13E-07  |
| Prost-AdenoCA   | 0bfd1043-8173-e3e4-e050-11ac  | SBS3  | SBS6  | 669    | 2564  | 0.0701381 | 0.0108139 | 0.0483386 |
| Prost-AdenoCA   | 0bfd1043-8173-e3e4-e050-11ac  | SBS4  | SBS6  | 2132   | 2564  | 0.0547661 | 0.0018554 | 0.0111589 |
| Biliary-AdenoCA | 7ae872a6-c623-11e3-bf01-24c6  | SBS1  | SBS3  | 424    | 1491  | 0.0951764 | 0.0050533 | 0.0259371 |
| Prost-AdenoCA   | 7ae9b843-488f-459c-8c0d-c81d  | SBS1  | SBS8  | 564    | 3015  | 0.1864278 | 9.10E-15  | 2.41E-13  |
| Prost-AdenoCA   | 7ae9b843-488f-459c-8c0d-c81d  | SBS1  | SBS9  | 564    | 341   | 0.167041  | 1.41E-05  | 0.0001418 |
| Prost-AdenoCA   | 7ae9b843-488f-459c-8c0d-c81d  | SBS1  | SBS12 | 564    | 1180  | 0.1608907 | 5.26E-09  | 8.32E-08  |
| Prost-AdenoCA   | 7ae9b843-488f-459c-8c0d-c81d  | SBS1  | SBS13 | 564    | 306   | 0.201189  | 2.12E-07  | 2.86E-06  |
| Prost-AdenoCA   | 7ae9b843-488f-459c-8c0d-c81d  | SBS8  | SBS12 | 3015   | 1180  | 0.0633963 | 0.0021899 | 0.0128746 |
| Prost-AdenoCA   | 7ae9b843-488f-459c-8c0d-c81d  | SBS8  | SBS15 | 3015   | 527   | 0.1402085 | 4.38E-08  | 6.29E-07  |
| Prost-AdenoCA   | 7ae9b843-488f-459c-8c0d-c81d  | SBS9  | SBS15 | 341    | 527   | 0.1319648 | 0.0014769 | 0.0091734 |
| Prost-AdenoCA   | 7ae9b843-488f-459c-8c0d-c81d  | SBS12 | SBS15 | 1180   | 527   | 0.1245827 | 2.45E-05  | 0.0002377 |
| Prost-AdenoCA   | 7ae9b843-488f-459c-8c0d-c81d  | SBS13 | SBS15 | 306    | 527   | 0.1531731 | 0.0002269 | 0.0017621 |
| Skin-Melanoma   | 7ba70717-d65e-4a45-af79-60a9  | SBS4  | SBS7  | 7120   | 73496 | 0.0327616 | 1.78E-06  | 2.09E-05  |
| Kidney-RCC      | 7bd3d112-d411-4ea8-a9a9-bd9   | SBS3  | SBS6  | 2476   | 548   | 0.1192676 | 5.72E-06  | 6.11E-05  |
| Kidney-RCC      | 7bd3d112-d411-4ea8-a9a9-bd9   | SBS6  | SBS9  | 548    | 296   | 0.1671434 | 4.34E-05  | 0.0003976 |
| Prost-AdenoCA   | 0bfd1043-8175-e3e4-e050-11ac  | SBS1  | SBS3  | 954    | 278   | 0.1180867 | 0.0049395 | 0.0255202 |
| Prost-AdenoCA   | 0bfd1043-8175-e3e4-e050-11ac  | SBS1  | SBS7  | 954    | 668   | 0.0889918 | 0.0039663 | 0.0211548 |
| Prost-AdenoCA   | 0bfd1043-8175-e3e4-e050-11ac  | SBS1  | SBS8  | 954    | 4111  | 0.0876964 | 1.34E-05  | 0.0001355 |



|                 |                               |       |       |       |       |           |           |           |
|-----------------|-------------------------------|-------|-------|-------|-------|-----------|-----------|-----------|
| Prost-AdenoCA   | 0bfd1043-8175-e3e4-e050-11ac  | SBS1  | SBS12 | 954   | 497   | 0.1019471 | 0.0022448 | 0.0131353 |
| Eso-AdenoCa     | 7c5c2293-3f40-4ae3-8346-6a32  | SBS1  | SBS5  | 4693  | 1558  | 0.1054217 | 1.02E-11  | 2.02E-10  |
| Eso-AdenoCa     | 7c5c2293-3f40-4ae3-8346-6a32  | SBS1  | SBS9  | 4693  | 4834  | 0.0443879 | 0.0001682 | 0.0013413 |
| Eso-AdenoCa     | 7c5c2293-3f40-4ae3-8346-6a32  | SBS5  | SBS9  | 1558  | 4834  | 0.0719911 | 9.93E-06  | 0.0001017 |
| Eso-AdenoCa     | 7c5c2293-3f40-4ae3-8346-6a32  | SBS5  | SBS17 | 1558  | 63133 | 0.0911176 | 2.17E-11  | 4.16E-10  |
| Eso-AdenoCa     | 7c5c2293-3f40-4ae3-8346-6a32  | SBS9  | SBS17 | 4834  | 63133 | 0.0312875 | 0.0003042 | 0.0023052 |
| Prost-AdenoCA   | 0bfd1043-8177-e3e4-e050-11ac  | SBS1  | SBS8  | 1497  | 1563  | 0.0685107 | 0.0015263 | 0.0094614 |
| Eso-AdenoCa     | 7d2da7ba-f57c-4083-9572-6fa9f | SBS1  | SBS11 | 10381 | 2078  | 0.0447706 | 0.0019347 | 0.0115807 |
| Eso-AdenoCa     | 7d2da7ba-f57c-4083-9572-6fa9f | SBS1  | SBS17 | 10381 | 7522  | 0.0359131 | 2.60E-05  | 0.0002502 |
| Eso-AdenoCa     | 7d2da7ba-f57c-4083-9572-6fa9f | SBS11 | SBS17 | 2078  | 7522  | 0.072062  | 9.06E-08  | 1.27E-06  |
| Prost-AdenoCA   | 0bfd1043-817c-e3e4-e050-11ac  | SBS6  | SBS8  | 1461  | 1639  | 0.0871318 | 1.61E-05  | 0.0001593 |
| Prost-AdenoCA   | 0bfd1043-817c-e3e4-e050-11ac  | SBS6  | SBS16 | 1461  | 770   | 0.0876939 | 0.0008568 | 0.0056818 |
| Liver-HCC       | 7df3a542-c623-11e3-bf01-24c6f | SBS5  | SBS8  | 114   | 2899  | 0.1631839 | 0.0058079 | 0.029095  |
| Liver-HCC       | 7df3a542-c623-11e3-bf01-24c6f | SBS5  | SBS16 | 114   | 8836  | 0.1993539 | 0.0002606 | 0.0019964 |
| Liver-HCC       | 7df3a542-c623-11e3-bf01-24c6f | SBS8  | SBS16 | 2899  | 8836  | 0.0388769 | 0.0027253 | 0.0154986 |
| Stomach-AdenoCA | 7e036d40-b669-4929-a1e2-c473  | SBS1  | SBS3  | 2300  | 6109  | 0.1079426 | 0         | 0         |
| Stomach-AdenoCA | 7e036d40-b669-4929-a1e2-c473  | SBS1  | SBS17 | 2300  | 12619 | 0.1149123 | 0         | 0         |
| Prost-AdenoCA   | 7e10e325-16d2-42df-b957-df4d3 | SBS1  | SBS4  | 876   | 444   | 0.0940392 | 0.0109071 | 0.0486513 |
| Prost-AdenoCA   | 7e10e325-16d2-42df-b957-df4d3 | SBS4  | SBS5  | 444   | 1366  | 0.0961181 | 0.0040935 | 0.0217064 |
| Prost-AdenoCA   | 7e10e325-16d2-42df-b957-df4d3 | SBS4  | SBS13 | 444   | 134   | 0.1726166 | 0.0043351 | 0.0227728 |
| Skin-Melanoma   | 7e22401d-f4cd-44c5-8a01-b08a  | SBS7  | SBS11 | 44245 | 3132  | 0.0377844 | 0.000472  | 0.0034079 |
| Liver-HCC       | 7eb0ee38-fbe2-49ea-ba63-aa13  | SBS8  | SBS16 | 2599  | 5293  | 0.0513178 | 0.000206  | 0.0016095 |
| Panc-AdenoCA    | 7f5fd36f-6e30-45ca-92a5-d8a8a | SBS1  | SBS5  | 1002  | 1545  | 0.0808441 | 0.0007089 | 0.0048339 |
| Eso-AdenoCa     | 7f94d650-41b9-4664-bcde-dc85  | SBS5  | SBS17 | 4530  | 41233 | 0.0628783 | 1.92E-14  | 4.89E-13  |
| Prost-AdenoCA   | 0bfd1043-8181-e3e4-e050-11ac  | SBS1  | SBS3  | 986   | 4950  | 0.0862303 | 9.79E-06  | 0.0001007 |
| Prost-AdenoCA   | 0bfd1043-8181-e3e4-e050-11ac  | SBS1  | SBS4  | 986   | 4819  | 0.0899023 | 3.59E-06  | 4.00E-05  |
| Prost-AdenoCA   | 0bfd1043-8181-e3e4-e050-11ac  | SBS1  | SBS8  | 986   | 1208  | 0.1064791 | 9.01E-06  | 9.38E-05  |
| Prost-AdenoCA   | 0bfd1043-8181-e3e4-e050-11ac  | SBS3  | SBS4  | 4950  | 4819  | 0.0368553 | 0.0026311 | 0.0150174 |
| Liver-HCC       | 819b4304-c622-11e3-bf01-24c6f | SBS4  | SBS12 | 8115  | 4584  | 0.0326701 | 0.003849  | 0.0207537 |
| Prost-AdenoCA   | 0bfd1043-8187-e3e4-e050-11ac  | SBS1  | SBS5  | 2278  | 1548  | 0.2250989 | 0         | 0         |
| Prost-AdenoCA   | 0bfd1043-8187-e3e4-e050-11ac  | SBS1  | SBS6  | 2278  | 179   | 0.2563701 | 6.71E-10  | 1.17E-08  |
| Prost-AdenoCA   | 0bfd1043-8187-e3e4-e050-11ac  | SBS1  | SBS8  | 2278  | 825   | 0.236676  | 0         | 0         |
| Prost-AdenoCA   | 0bfd1043-8187-e3e4-e050-11ac  | SBS5  | SBS8  | 1548  | 825   | 0.0734132 | 0.0060488 | 0.0301336 |
| Panc-AdenoCA    | 8282283d-247a-431d-9421-0fcc  | SBS1  | SBS3  | 882   | 7903  | 0.0970287 | 6.50E-07  | 8.05E-06  |
| Panc-AdenoCA    | 8282283d-247a-431d-9421-0fcc  | SBS1  | SBS13 | 882   | 1925  | 0.0680726 | 0.0073536 | 0.0353954 |
| Panc-AdenoCA    | 8282283d-247a-431d-9421-0fcc  | SBS2  | SBS3  | 1382  | 7903  | 0.1060728 | 6.39E-12  | 1.29E-10  |
| Panc-AdenoCA    | 8282283d-247a-431d-9421-0fcc  | SBS2  | SBS13 | 1382  | 1925  | 0.0871265 | 9.93E-06  | 0.0001017 |
| Panc-AdenoCA    | 8282283d-247a-431d-9421-0fcc  | SBS3  | SBS13 | 7903  | 1925  | 0.0467597 | 0.0022975 | 0.0134186 |
| Liver-HCC       | 83d57c5c-c622-11e3-bf01-24c6f | SBS1  | SBS2  | 377   | 416   | 0.1156333 | 0.0100956 | 0.0457809 |
| Panc-AdenoCA    | 8454fe53-869d-41c8-b0c8-a792  | SBS3  | SBS6  | 852   | 1509  | 0.0778288 | 0.002729  | 0.0155058 |
| Panc-AdenoCA    | 8454fe53-869d-41c8-b0c8-a792  | SBS3  | SBS8  | 852   | 319   | 0.1274854 | 0.0010581 | 0.0069149 |
| Panc-AdenoCA    | 8454fe53-869d-41c8-b0c8-a792  | SBS4  | SBS6  | 2656  | 1509  | 0.0664552 | 0.0004072 | 0.0030093 |
| Panc-AdenoCA    | 8454fe53-869d-41c8-b0c8-a792  | SBS4  | SBS8  | 2656  | 319   | 0.1115095 | 0.0016794 | 0.0102779 |
| Panc-AdenoCA    | 8454fe53-869d-41c8-b0c8-a792  | SBS4  | SBS17 | 2656  | 2434  | 0.0577425 | 0.0004196 | 0.00309   |
| Panc-AdenoCA    | 8454fe53-869d-41c8-b0c8-a792  | SBS6  | SBS8  | 1509  | 319   | 0.1414273 | 5.32E-05  | 0.0004785 |
| Panc-AdenoCA    | 8454fe53-869d-41c8-b0c8-a792  | SBS6  | SBS10 | 1509  | 345   | 0.1232431 | 0.0003949 | 0.0029321 |
| Panc-AdenoCA    | 8454fe53-869d-41c8-b0c8-a792  | SBS8  | SBS17 | 319   | 2434  | 0.1552368 | 2.50E-06  | 2.89E-05  |
| Panc-AdenoCA    | 8454fe53-869d-41c8-b0c8-a792  | SBS10 | SBS17 | 345   | 2434  | 0.1099199 | 0.0013486 | 0.0085196 |
| Panc-AdenoCA    | 84a6ea88-eeb8-4060-a90c-e4at  | SBS1  | SBS3  | 941   | 8352  | 0.1030507 | 3.16E-08  | 4.63E-07  |
| Prost-AdenoCA   | 0bfd1068-3fc3-a95b-e050-11ac  | SBS1  | SBS2  | 2352  | 839   | 0.1124694 | 3.21E-07  | 4.17E-06  |
| Prost-AdenoCA   | 0bfd1068-3fc3-a95b-e050-11ac  | SBS1  | SBS4  | 2352  | 1386  | 0.0807437 | 2.30E-05  | 0.0002239 |
| Prost-AdenoCA   | 0bfd1068-3fc3-a95b-e050-11ac  | SBS1  | SBS14 | 2352  | 231   | 0.1564239 | 6.77E-05  | 0.0005943 |
| Prost-AdenoCA   | 0bfd1068-3fc3-a95b-e050-11ac  | SBS2  | SBS12 | 839   | 1246  | 0.1178704 | 1.78E-06  | 2.09E-05  |
| Prost-AdenoCA   | 0bfd1068-3fc3-a95b-e050-11ac  | SBS4  | SBS12 | 1386  | 1246  | 0.0872935 | 9.08E-05  | 0.0007723 |
| Prost-AdenoCA   | 0bfd1068-3fc3-a95b-e050-11ac  | SBS12 | SBS14 | 1246  | 231   | 0.151807  | 0.0002514 | 0.0019304 |
| Liver-HCC       | 850389d4-c622-11e3-bf01-24c6f | SBS4  | SBS12 | 10266 | 4835  | 0.0817001 | 0         | 0         |
| Liver-HCC       | 850389d4-c622-11e3-bf01-24c6f | SBS4  | SBS14 | 10266 | 1305  | 0.0750763 | 4.29E-06  | 4.71E-05  |
| Liver-HCC       | 850389d4-c622-11e3-bf01-24c6f | SBS8  | SBS12 | 618   | 4835  | 0.0748604 | 0.0043029 | 0.0226415 |
| Liver-HCC       | 850389d4-c622-11e3-bf01-24c6f | SBS12 | SBS14 | 4835  | 1305  | 0.051952  | 0.0077968 | 0.0372146 |
| Prost-AdenoCA   | 0bfd1068-3fc5-a95b-e050-11ac  | SBS1  | SBS3  | 1124  | 2477  | 0.072527  | 0.0005868 | 0.0041323 |
| Prost-AdenoCA   | 0bfd1068-3fc5-a95b-e050-11ac  | SBS1  | SBS6  | 1124  | 336   | 0.1107969 | 0.0034902 | 0.0191032 |
| Prost-AdenoCA   | 0bfd1068-3fc5-a95b-e050-11ac  | SBS3  | SBS6  | 2477  | 336   | 0.0937434 | 0.0110327 | 0.0491063 |
| Liver-HCC       | 8659a35e-c622-11e3-bf01-24c6f | SBS1  | SBS8  | 600   | 330   | 0.1125758 | 0.009066  | 0.042024  |
| Prost-AdenoCA   | 0bfd1068-3fca-a95b-e050-11ac  | SBS6  | SBS8  | 54    | 1012  | 0.228883  | 0.0092968 | 0.0428718 |

|                |                               |       |       |       |       |           |           |           |
|----------------|-------------------------------|-------|-------|-------|-------|-----------|-----------|-----------|
| Ovary-AdenoCA  | 86f23897-dba0-4e89-8381-d174  | SBS1  | SBS3  | 1039  | 8639  | 0.0706891 | 0.0001886 | 0.0014813 |
| Kidney-RCC     | 00db1b95-8ca3-4cc4-bb46-6b8c  | SBS2  | SBS9  | 881   | 159   | 0.1506364 | 0.0044293 | 0.023229  |
| Prost-AdenoCA  | 0bfd1068-3fcd-a95b-e050-11ac  | SBS1  | SBS8  | 2608  | 1108  | 0.0589259 | 0.0090309 | 0.0418925 |
| Prost-AdenoCA  | 887616c5-06a7-4e83-948c-3546  | SBS1  | SBS3  | 1422  | 604   | 0.1114651 | 5.32E-05  | 0.0004785 |
| Prost-AdenoCA  | 887616c5-06a7-4e83-948c-3546  | SBS1  | SBS5  | 1422  | 339   | 0.1567965 | 2.85E-06  | 3.26E-05  |
| Ovary-AdenoCA  | 8888e808-594b-4c76-b2e4-62a2  | SBS1  | SBS3  | 537   | 11732 | 0.1162296 | 1.89E-06  | 2.21E-05  |
| Ovary-AdenoCA  | 8888e808-594b-4c76-b2e4-62a2  | SBS1  | SBS4  | 537   | 828   | 0.1180336 | 0.0002287 | 0.0017736 |
| Ovary-AdenoCA  | 8888e808-594b-4c76-b2e4-62a2  | SBS1  | SBS13 | 537   | 1086  | 0.1037378 | 0.0008756 | 0.0057946 |
| Lymph-BNHL     | 2439ec74-1713-4d47-a5d9-886f  | SBS5  | SBS6  | 915   | 2520  | 0.0655673 | 0.0062293 | 0.0307879 |
| Lymph-BNHL     | 2439ec74-1713-4d47-a5d9-886f  | SBS6  | SBS9  | 2520  | 10852 | 0.04624   | 0.0003184 | 0.0024069 |
| Panc-Endocrine | aa215f18-ae1f-4f0e-89dd-ac59e | SBS3  | SBS11 | 2872  | 1164  | 0.1002247 | 1.19E-07  | 1.64E-06  |
| Panc-Endocrine | aa215f18-ae1f-4f0e-89dd-ac59e | SBS4  | SBS11 | 395   | 1164  | 0.1025512 | 0.0040459 | 0.0214879 |
| Eso-AdenoCa    | 3b590d75-ccfb-4da8-a2e9-10fb  | SBS1  | SBS17 | 8558  | 17667 | 0.062164  | 0         | 0         |
| Bone-Osteosarc | f86b7e84-7040-c751-e040-11ac  | SBS3  | SBS14 | 4872  | 490   | 0.0885351 | 0.0018612 | 0.0111749 |
| Bone-Osteosarc | f86b7e84-7040-c751-e040-11ac  | SBS13 | SBS14 | 724   | 490   | 0.1142237 | 0.0009759 | 0.0064273 |
| Eso-AdenoCa    | b8f3137e-5e92-4a56-90d4-884a  | SBS1  | SBS2  | 5403  | 869   | 0.0863544 | 2.83E-05  | 0.0002698 |
| Eso-AdenoCa    | b8f3137e-5e92-4a56-90d4-884a  | SBS1  | SBS13 | 5403  | 843   | 0.0777537 | 0.0002963 | 0.0022482 |
| Eso-AdenoCa    | b8f3137e-5e92-4a56-90d4-884a  | SBS1  | SBS17 | 5403  | 1814  | 0.0738915 | 7.25E-07  | 8.94E-06  |
| Eso-AdenoCa    | 3bb4c27b-4d0d-4d13-b910-41a   | SBS1  | SBS17 | 5603  | 10093 | 0.0821139 | 0         | 0         |
| Eso-AdenoCa    | 3bb4c27b-4d0d-4d13-b910-41a   | SBS2  | SBS13 | 1836  | 2030  | 0.0591707 | 0.0023401 | 0.013642  |
| Eso-AdenoCa    | 3bb4c27b-4d0d-4d13-b910-41a   | SBS2  | SBS17 | 1836  | 10093 | 0.1117097 | 0         | 0         |
| Eso-AdenoCa    | 3bb4c27b-4d0d-4d13-b910-41a   | SBS3  | SBS17 | 3946  | 10093 | 0.0852262 | 0         | 0         |
| Eso-AdenoCa    | 3bb4c27b-4d0d-4d13-b910-41a   | SBS13 | SBS17 | 2030  | 10093 | 0.0631858 | 2.76E-06  | 3.16E-05  |
| Liver-HCC      | 1ea7e01c-c623-11e3-bf01-24c6  | SBS12 | SBS16 | 4225  | 4022  | 0.0441884 | 0.0006403 | 0.0044635 |
| Eso-AdenoCa    | 9c00828e-e9ae-4b9c-959e-3483  | SBS1  | SBS17 | 2768  | 10058 | 0.0518866 | 1.68E-05  | 0.0001655 |
| Eso-AdenoCa    | 9c00828e-e9ae-4b9c-959e-3483  | SBS4  | SBS17 | 3803  | 10058 | 0.0463923 | 1.39E-05  | 0.0001393 |
| Liver-HCC      | dbfa4e8a-c622-11e3-bf01-24c6  | SBS8  | SBS12 | 3017  | 978   | 0.0965124 | 2.12E-06  | 2.46E-05  |
| Liver-HCC      | dbfa4e8a-c622-11e3-bf01-24c6  | SBS12 | SBS16 | 978   | 6435  | 0.0641359 | 0.0018525 | 0.0111525 |
| Prost-AdenoCA  | 41027c0b-85af-4c78-bba0-0da6  | SBS1  | SBS9  | 1232  | 723   | 0.0889388 | 0.0014813 | 0.0091912 |
| Breast-AdenoCa | f393bb0a-9b20-a0e5-e040-11ac  | SBS1  | SBS3  | 507   | 2481  | 0.1058435 | 0.0001602 | 0.0012867 |
| Breast-AdenoCa | f393bb0a-9b20-a0e5-e040-11ac  | SBS1  | SBS12 | 507   | 224   | 0.1377853 | 0.0054847 | 0.027787  |
| Breast-AdenoCa | f393bb0a-9b20-a0e5-e040-11ac  | SBS3  | SBS13 | 2481  | 1049  | 0.0729448 | 0.0007826 | 0.0052532 |
| Skin-Melanoma  | 351db483-a70e-496d-b70a-744   | SBS1  | SBS3  | 484   | 852   | 0.0943235 | 0.0082373 | 0.0389023 |
| Skin-Melanoma  | 351db483-a70e-496d-b70a-744   | SBS1  | SBS14 | 484   | 475   | 0.1167856 | 0.0028911 | 0.0163084 |
| Liver-HCC      | 4f1fc78e-733d-4c6e-86b2-dbe1  | SBS5  | SBS16 | 593   | 9070  | 0.0866236 | 0.0004713 | 0.0034066 |
| Panc-AdenoCA   | cafe9603-a804-48fb-9217-e2d1  | SBS1  | SBS2  | 6446  | 801   | 0.1879622 | 0         | 0         |
| Panc-AdenoCA   | cafe9603-a804-48fb-9217-e2d1  | SBS1  | SBS6  | 6446  | 261   | 0.1276244 | 0.0005652 | 0.0039979 |
| Panc-AdenoCA   | cafe9603-a804-48fb-9217-e2d1  | SBS1  | SBS8  | 6446  | 1174  | 0.1023978 | 1.80E-09  | 3.00E-08  |
| Panc-AdenoCA   | cafe9603-a804-48fb-9217-e2d1  | SBS2  | SBS8  | 801   | 1174  | 0.0978249 | 0.0002204 | 0.001714  |
| Eso-AdenoCa    | 15e7d981-8c27-4b2b-b4f8-626e  | SBS14 | SBS17 | 2908  | 6272  | 0.0434549 | 0.0011023 | 0.0071557 |
| Eso-AdenoCa    | b53dcb4d-f894-47b8-8a4e-17c7  | SBS1  | SBS3  | 11269 | 5445  | 0.0490421 | 4.28E-08  | 6.18E-07  |
| Eso-AdenoCa    | b53dcb4d-f894-47b8-8a4e-17c7  | SBS1  | SBS11 | 11269 | 2896  | 0.0534883 | 3.76E-06  | 4.19E-05  |
| Eso-AdenoCa    | b53dcb4d-f894-47b8-8a4e-17c7  | SBS1  | SBS17 | 11269 | 19371 | 0.0696481 | 0         | 0         |
| Eso-AdenoCa    | b53dcb4d-f894-47b8-8a4e-17c7  | SBS3  | SBS17 | 5445  | 19371 | 0.1138716 | 0         | 0         |
| Eso-AdenoCa    | b53dcb4d-f894-47b8-8a4e-17c7  | SBS11 | SBS17 | 2896  | 19371 | 0.1179387 | 0         | 0         |
| Liver-HCC      | 5bb37ffc-c623-11e3-bf01-24c6  | SBS3  | SBS12 | 4090  | 12990 | 0.0307854 | 0.0055004 | 0.027844  |
| Kidney-RCC     | d5c87d16-172f-4790-8867-949d  | SBS3  | SBS6  | 6246  | 794   | 0.1662025 | 0         | 0         |
| Kidney-RCC     | d5c87d16-172f-4790-8867-949d  | SBS4  | SBS6  | 1322  | 794   | 0.1651189 | 3.58E-12  | 7.45E-11  |
| Prost-AdenoCA  | 07f16397-71bb-4594-ad4d-caa7  | SBS3  | SBS8  | 306   | 1404  | 0.1018519 | 0.0108942 | 0.0486282 |
| Breast-AdenoCa | fc93b9ab-760a-5223-e040-11ac  | SBS1  | SBS7  | 790   | 507   | 0.1066087 | 0.0017884 | 0.010829  |
| Breast-AdenoCa | fc93b9ab-760a-5223-e040-11ac  | SBS3  | SBS7  | 6980  | 507   | 0.0745918 | 0.0103929 | 0.0468913 |
| Prost-AdenoCA  | 0bfe2ac9-0af8-c248-e050-11ac  | SBS1  | SBS7  | 296   | 623   | 0.1142304 | 0.0106356 | 0.0477457 |
| Prost-AdenoCA  | 0bfe2ac9-0af8-c248-e050-11ac  | SBS1  | SBS9  | 296   | 1191  | 0.1077479 | 0.0081346 | 0.0385332 |
| Prost-AdenoCA  | 0bfe2ac9-0af8-c248-e050-11ac  | SBS7  | SBS13 | 623   | 541   | 0.1038354 | 0.0038847 | 0.0208614 |
| Head-SCC       | bcc819eb-f4d8-4ddc-9fdc-a6307 | SBS1  | SBS2  | 1161  | 845   | 0.0809015 | 0.0033172 | 0.0183    |
| Head-SCC       | bcc819eb-f4d8-4ddc-9fdc-a6307 | SBS1  | SBS13 | 1161  | 1004  | 0.0947545 | 0.0001265 | 0.0010463 |
| Panc-AdenoCA   | b37d6283-6f95-4975-a794-f3d5  | SBS1  | SBS2  | 1220  | 414   | 0.0941118 | 0.008376  | 0.0393843 |
| Breast-AdenoCa | f7c7373c-1972-4968-e040-11ac  | SBS2  | SBS13 | 32407 | 22970 | 0.0335555 | 1.43E-13  | 3.37E-12  |
| Eso-AdenoCa    | a92023de-5c97-4bf2-aa3c-0e76  | SBS6  | SBS17 | 4473  | 80305 | 0.0752222 | 0         | 0         |
| Eso-AdenoCa    | a92023de-5c97-4bf2-aa3c-0e76  | SBS7  | SBS17 | 3985  | 80305 | 0.0593034 | 5.05E-12  | 1.03E-10  |
| Liver-HCC      | 1df8939c-c622-11e3-bf01-24c6  | SBS5  | SBS17 | 2913  | 1496  | 0.0561761 | 0.0039064 | 0.0209242 |
| Panc-Endocrine | 589e0aea-9057-4b8c-8af1-74c7  | SBS1  | SBS2  | 282   | 203   | 0.1648499 | 0.0032729 | 0.0181038 |
| Panc-Endocrine | 589e0aea-9057-4b8c-8af1-74c7  | SBS2  | SBS3  | 203   | 473   | 0.1525531 | 0.0026903 | 0.0153136 |
| Panc-Endocrine | 589e0aea-9057-4b8c-8af1-74c7  | SBS2  | SBS5  | 203   | 2421  | 0.1777468 | 1.45E-05  | 0.0001449 |

|                 |                                |       |       |        |       |           |           |           |
|-----------------|--------------------------------|-------|-------|--------|-------|-----------|-----------|-----------|
| Panc-Endocrine  | 589e0aea-9057-4b8c-8af1-74c7   | SBS5  | SBS11 | 2421   | 776   | 0.0993977 | 1.81E-05  | 0.0001777 |
| Skin-Melanoma   | b42d183c-bc9c-4652-9e56-10c5   | SBS7  | SBS11 | 91208  | 6601  | 0.0308703 | 1.61E-05  | 0.000159  |
| Eso-AdenoCa     | ec474dfa-527c-44f3-9224-bf1c8  | SBS7  | SBS17 | 1150   | 10624 | 0.0528634 | 0.0060572 | 0.0301513 |
| Breast-AdenoCa  | fc8130e3-023d-c7d4-e040-11ac   | SBS1  | SBS3  | 900    | 5485  | 0.0668014 | 0.0020153 | 0.0120053 |
| Ovary-AdenoCA   | 8b28f6d2-4b7d-493b-826e-b119   | SBS1  | SBS3  | 1152   | 11232 | 0.0666845 | 0.0001842 | 0.0014506 |
| Panc-AdenoCA    | d05ea63c-86a3-463a-a790-2ede   | SBS1  | SBS8  | 4543   | 1408  | 0.1499405 | 0         | 0         |
| Ovary-AdenoCA   | 0d0793c1-df1b-4db1-ba36-adcb   | SBS3  | SBS14 | 10731  | 545   | 0.0851293 | 0.001087  | 0.0070816 |
| Eso-AdenoCa     | fab0be4b-c84a-45cd-a76f-44d9e  | SBS1  | SBS2  | 3911   | 2099  | 0.0843899 | 7.11E-09  | 1.11E-07  |
| Eso-AdenoCa     | fab0be4b-c84a-45cd-a76f-44d9e  | SBS1  | SBS6  | 3911   | 835   | 0.0885536 | 4.11E-05  | 0.0003786 |
| Eso-AdenoCa     | fab0be4b-c84a-45cd-a76f-44d9e  | SBS1  | SBS8  | 3911   | 6223  | 0.0786914 | 2.42E-13  | 5.57E-12  |
| Eso-AdenoCa     | fab0be4b-c84a-45cd-a76f-44d9e  | SBS1  | SBS17 | 3911   | 3590  | 0.0637676 | 4.90E-07  | 6.26E-06  |
| Eso-AdenoCa     | fab0be4b-c84a-45cd-a76f-44d9e  | SBS2  | SBS17 | 2099   | 3590  | 0.1404999 | 0         | 0         |
| Eso-AdenoCa     | fab0be4b-c84a-45cd-a76f-44d9e  | SBS6  | SBS17 | 835    | 3590  | 0.1313779 | 1.40E-10  | 2.57E-09  |
| Eso-AdenoCa     | fab0be4b-c84a-45cd-a76f-44d9e  | SBS8  | SBS17 | 6223   | 3590  | 0.1349484 | 0         | 0         |
| Eso-AdenoCa     | fab0be4b-c84a-45cd-a76f-44d9e  | SBS9  | SBS17 | 616    | 3590  | 0.1109693 | 4.76E-06  | 5.17E-05  |
| Panc-Endocrine  | c9e7cff0-aec2-4ff2-8091-7cbea2 | SBS3  | SBS6  | 8847   | 695   | 0.067052  | 0.0060903 | 0.0302918 |
| Liver-HCC       | e75fbf08-c622-11e3-bf01-24c65  | SBS1  | SBS16 | 291    | 6779  | 0.1055889 | 0.0039719 | 0.0211668 |
| Breast-AdenoCa  | fca07e09-1fd2-9ef5-e040-11ac0  | SBS3  | SBS13 | 9837   | 1118  | 0.0757909 | 1.96E-05  | 0.0001916 |
| Breast-AdenoCa  | fca07e09-1fd2-9ef5-e040-11ac0  | SBS13 | SBS14 | 1118   | 630   | 0.1058665 | 0.000239  | 0.0018471 |
| Panc-AdenoCA    | ef3a0ccd-85bc-4e5f-a8c6-5a2e2  | SBS1  | SBS3  | 5184   | 1056  | 0.1417999 | 9.99E-16  | 2.89E-14  |
| Skin-Melanoma   | 4e8396f7-9506-4401-96b6-bb2e   | SBS3  | SBS7  | 8090   | 16657 | 0.0512229 | 7.78E-13  | 1.73E-11  |
| Liver-HCC       | 2e0bbaf6-c623-11e3-bf01-24c65  | SBS8  | SBS16 | 900    | 2314  | 0.1007231 | 3.90E-06  | 4.31E-05  |
| Panc-AdenoCA    | ec646623-6d33-4fbd-888e-89f5f  | SBS1  | SBS8  | 2311   | 2680  | 0.0703801 | 9.16E-06  | 9.52E-05  |
| Panc-AdenoCA    | ec646623-6d33-4fbd-888e-89f5f  | SBS7  | SBS8  | 1419   | 2680  | 0.0953736 | 9.35E-08  | 1.31E-06  |
| Liver-HCC       | 10cb8ac6-c622-11e3-bf01-24c6f  | SBS12 | SBS16 | 15155  | 4013  | 0.0404724 | 6.12E-05  | 0.0005441 |
| Panc-AdenoCA    | 97c46ede-b280-4344-8dbb-e86c   | SBS1  | SBS16 | 3031   | 1733  | 0.0515011 | 0.005766  | 0.0289085 |
| Panc-AdenoCA    | 97c46ede-b280-4344-8dbb-e86c   | SBS2  | SBS16 | 567    | 1733  | 0.0848596 | 0.0042542 | 0.0224422 |
| Panc-AdenoCA    | 97c46ede-b280-4344-8dbb-e86c   | SBS11 | SBS16 | 296    | 1733  | 0.1032813 | 0.0090908 | 0.042077  |
| Eso-AdenoCa     | f48c3c82-bebe-4b8e-909e-e1a5   | SBS1  | SBS14 | 2867   | 1103  | 0.0628119 | 0.003727  | 0.0201702 |
| Eso-AdenoCa     | f48c3c82-bebe-4b8e-909e-e1a5   | SBS1  | SBS17 | 2867   | 14676 | 0.0863109 | 5.55E-16  | 1.65E-14  |
| Eso-AdenoCa     | f48c3c82-bebe-4b8e-909e-e1a5   | SBS9  | SBS17 | 1746   | 14676 | 0.0517023 | 0.0004765 | 0.0034366 |
| Liver-HCC       | ba940092-c622-11e3-bf01-24c6f  | SBS3  | SBS12 | 2826   | 7285  | 0.0394138 | 0.0035781 | 0.0195501 |
| Kidney-RCC      | f9a81200-5381-496a-8062-099f   | SBS1  | SBS3  | 624    | 7573  | 0.0738417 | 0.0037213 | 0.0201568 |
| Kidney-RCC      | f9a81200-5381-496a-8062-099f   | SBS1  | SBS8  | 624    | 113   | 0.1760551 | 0.005312  | 0.0270874 |
| Kidney-RCC      | f9a81200-5381-496a-8062-099f   | SBS1  | SBS11 | 624    | 711   | 0.101516  | 0.0021195 | 0.0125194 |
| Liver-HCC       | 9563a264-c622-11e3-bf01-24c6f  | SBS1  | SBS4  | 285    | 417   | 0.1438596 | 0.0018105 | 0.0109308 |
| Liver-HCC       | 9563a264-c622-11e3-bf01-24c6f  | SBS1  | SBS8  | 285    | 173   | 0.1573471 | 0.0096827 | 0.0442284 |
| Liver-HCC       | 9563a264-c622-11e3-bf01-24c6f  | SBS4  | SBS5  | 417    | 4431  | 0.1387185 | 8.53E-07  | 1.04E-05  |
| Liver-HCC       | 9563a264-c622-11e3-bf01-24c6f  | SBS5  | SBS8  | 4431   | 173   | 0.1487875 | 0.0012574 | 0.0080149 |
| Stomach-AdenoCA | 25f07374-313a-4100-9a60-3d21   | SBS1  | SBS17 | 3346   | 28543 | 0.0396795 | 0.0001604 | 0.0012867 |
| Stomach-AdenoCA | 25f07374-313a-4100-9a60-3d21   | SBS2  | SBS17 | 2468   | 28543 | 0.0388357 | 0.0021146 | 0.0125019 |
| Stomach-AdenoCA | 25f07374-313a-4100-9a60-3d21   | SBS8  | SBS12 | 7769   | 3467  | 0.0440772 | 0.0001802 | 0.0014219 |
| Stomach-AdenoCA | 25f07374-313a-4100-9a60-3d21   | SBS8  | SBS17 | 7769   | 28543 | 0.0485313 | 6.42E-13  | 1.44E-11  |
| Skin-Melanoma   | 2790b964-63e3-49aa-bf8c-9a00   | SBS7  | SBS11 | 374490 | 21223 | 0.0271113 | 3.01E-13  | 6.88E-12  |
| Kidney-RCC      | c19a1388-95e6-4708-a24c-3738   | SBS1  | SBS8  | 474    | 4095  | 0.0883974 | 0.002616  | 0.0149447 |
| Kidney-RCC      | c19a1388-95e6-4708-a24c-3738   | SBS1  | SBS16 | 474    | 599   | 0.1682375 | 6.25E-07  | 7.80E-06  |
| Kidney-RCC      | c19a1388-95e6-4708-a24c-3738   | SBS3  | SBS16 | 45     | 599   | 0.2966797 | 0.0012621 | 0.0080298 |
| Kidney-RCC      | c19a1388-95e6-4708-a24c-3738   | SBS8  | SBS16 | 4095   | 599   | 0.0968925 | 0.0001096 | 0.0009134 |
| Kidney-RCC      | c19a1388-95e6-4708-a24c-3738   | SBS13 | SBS16 | 462    | 599   | 0.1013702 | 0.0093972 | 0.0432714 |
| Eso-AdenoCa     | 526b3796-2cbd-4eec-8273-064b   | SBS5  | SBS8  | 4974   | 1309  | 0.0551361 | 0.0036705 | 0.0199662 |
| Prost-AdenoCA   | 8c0a7dfa-6ec3-4262-b718-c360f  | SBS1  | SBS5  | 1639   | 1188  | 0.0758706 | 0.0007199 | 0.0048988 |
| Biliary-AdenoCA | f0e0d978-3e32-4444-a07a-2604   | SBS1  | SBS7  | 3485   | 1585  | 0.0491263 | 0.0104037 | 0.0469065 |
| Biliary-AdenoCA | f0e0d978-3e32-4444-a07a-2604   | SBS3  | SBS7  | 2354   | 1585  | 0.0736996 | 6.80E-05  | 0.0005956 |
| Biliary-AdenoCA | f0e0d978-3e32-4444-a07a-2604   | SBS7  | SBS8  | 1585   | 3063  | 0.0593717 | 0.0012676 | 0.0080571 |
| Lymph-BNHL      | 9c27fedd-b1b3-4af0-9e9b-20271  | SBS3  | SBS9  | 6157   | 5831  | 0.0347592 | 0.0014395 | 0.0089943 |
| Lymph-BNHL      | 9c27fedd-b1b3-4af0-9e9b-20271  | SBS3  | SBS11 | 6157   | 2400  | 0.0747795 | 8.19E-09  | 1.27E-07  |
| Lymph-BNHL      | 9c27fedd-b1b3-4af0-9e9b-20271  | SBS3  | SBS13 | 6157   | 1858  | 0.1008372 | 4.96E-13  | 1.12E-11  |
| Lymph-BNHL      | 9c27fedd-b1b3-4af0-9e9b-20271  | SBS6  | SBS11 | 3804   | 2400  | 0.0977379 | 1.23E-12  | 2.67E-11  |
| Lymph-BNHL      | 9c27fedd-b1b3-4af0-9e9b-20271  | SBS6  | SBS13 | 3804   | 1858  | 0.1287399 | 0         | 0         |
| Lymph-BNHL      | 9c27fedd-b1b3-4af0-9e9b-20271  | SBS9  | SBS11 | 5831   | 2400  | 0.097408  | 1.94E-14  | 4.93E-13  |
| Lymph-BNHL      | 9c27fedd-b1b3-4af0-9e9b-20271  | SBS9  | SBS13 | 5831   | 1858  | 0.1335311 | 0         | 0         |
| Panc-AdenoCA    | d5796835-d6cd-427e-a398-5fbei  | SBS1  | SBS17 | 2887   | 931   | 0.0842099 | 9.22E-05  | 0.0007822 |
| Kidney-RCC      | 3afae3fb-2d87-4724-a589-d31cc  | SBS3  | SBS8  | 491    | 2724  | 0.0809969 | 0.0085198 | 0.0399056 |
| Kidney-RCC      | 494701ce-05d4-440b-a65e-d92f   | SBS3  | SBS6  | 3704   | 264   | 0.1251882 | 0.0008839 | 0.0058371 |

|                  |                                |       |       |        |       |           |           |           |
|------------------|--------------------------------|-------|-------|--------|-------|-----------|-----------|-----------|
| Kidney-RCC       | 494701ce-05d4-440b-a65e-d925   | SBS4  | SBS6  | 495    | 264   | 0.1227273 | 0.0111824 | 0.0497022 |
| Eso-AdenoCa      | 28e81540-4744-4865-b627-c7c9   | SBS1  | SBS17 | 2281   | 8409  | 0.0489116 | 0.0003737 | 0.002795  |
| Eso-AdenoCa      | 28e81540-4744-4865-b627-c7c9   | SBS3  | SBS17 | 1542   | 8409  | 0.0702916 | 5.11E-06  | 5.54E-05  |
| Eso-AdenoCa      | cb753e6f-5ea3-4b58-9db3-7a62   | SBS1  | SBS3  | 9264   | 3601  | 0.0652758 | 5.06E-10  | 8.88E-09  |
| Eso-AdenoCa      | cb753e6f-5ea3-4b58-9db3-7a62   | SBS1  | SBS17 | 9264   | 5906  | 0.132041  | 0         | 0         |
| Eso-AdenoCa      | cb753e6f-5ea3-4b58-9db3-7a62   | SBS3  | SBS7  | 3601   | 1938  | 0.0533208 | 0.0015476 | 0.0095836 |
| Eso-AdenoCa      | cb753e6f-5ea3-4b58-9db3-7a62   | SBS3  | SBS17 | 3601   | 5906  | 0.1922977 | 0         | 0         |
| Eso-AdenoCa      | cb753e6f-5ea3-4b58-9db3-7a62   | SBS7  | SBS17 | 1938   | 5906  | 0.1503094 | 0         | 0         |
| Liver-HCC        | 446437de-c622-11e3-bf01-24c6   | SBS3  | SBS4  | 1063   | 5087  | 0.0674172 | 0.0006759 | 0.0046444 |
| Liver-HCC        | 446437de-c622-11e3-bf01-24c6   | SBS4  | SBS16 | 5087   | 5252  | 0.0453998 | 4.73E-05  | 0.0004301 |
| Panc-AdenoCA     | 28f41a20-b6d6-4ecc-888f-72f77  | SBS1  | SBS3  | 412    | 3088  | 0.099656  | 0.0014634 | 0.0091077 |
| Panc-AdenoCA     | 28f41a20-b6d6-4ecc-888f-72f77  | SBS1  | SBS5  | 412    | 1074  | 0.1150585 | 0.0007534 | 0.0050934 |
| Biliary-AdenoCA  | ec399861-7a56-4ffd-8619-700b   | SBS1  | SBS2  | 2455   | 4419  | 0.0679339 | 9.43E-07  | 1.15E-05  |
| Biliary-AdenoCA  | ec399861-7a56-4ffd-8619-700b   | SBS1  | SBS13 | 2455   | 2919  | 0.0546199 | 0.0007008 | 0.0047894 |
| Biliary-AdenoCA  | ec399861-7a56-4ffd-8619-700b   | SBS2  | SBS8  | 4419   | 4076  | 0.0793909 | 4.93E-12  | 1.01E-10  |
| Biliary-AdenoCA  | ec399861-7a56-4ffd-8619-700b   | SBS8  | SBS13 | 4076   | 2919  | 0.0671364 | 4.39E-07  | 5.64E-06  |
| Eso-AdenoCa      | 23fa90d5-b273-4e2c-9c88-68aa   | SBS1  | SBS8  | 841    | 3869  | 0.0843852 | 0.0001067 | 0.0008904 |
| Eso-AdenoCa      | 23fa90d5-b273-4e2c-9c88-68aa   | SBS3  | SBS4  | 172    | 76    | 0.2337821 | 0.0062922 | 0.0310008 |
| Eso-AdenoCa      | 23fa90d5-b273-4e2c-9c88-68aa   | SBS3  | SBS15 | 172    | 571   | 0.1545636 | 0.0036155 | 0.0197027 |
| Eso-AdenoCa      | 23fa90d5-b273-4e2c-9c88-68aa   | SBS4  | SBS8  | 76     | 3869  | 0.1942294 | 0.0072222 | 0.0348702 |
| Eso-AdenoCa      | 23fa90d5-b273-4e2c-9c88-68aa   | SBS5  | SBS8  | 1643   | 3869  | 0.0483079 | 0.0091916 | 0.0424806 |
| Eso-AdenoCa      | 23fa90d5-b273-4e2c-9c88-68aa   | SBS5  | SBS15 | 1643   | 571   | 0.0871361 | 0.0032101 | 0.017806  |
| Eso-AdenoCa      | 23fa90d5-b273-4e2c-9c88-68aa   | SBS8  | SBS15 | 3869   | 571   | 0.1220374 | 7.32E-07  | 8.99E-06  |
| Bone-Osteosarc   | f86e2d80-911b-7a19-e040-11ac   | SBS3  | SBS17 | 5571   | 2517  | 0.0445374 | 0.0020606 | 0.0122407 |
| Liver-HCC        | c7d798b8-c622-11e3-bf01-24c6   | SBS8  | SBS12 | 1142   | 6346  | 0.0663504 | 0.0003983 | 0.0029538 |
| Liver-HCC        | c7d798b8-c622-11e3-bf01-24c6   | SBS12 | SBS16 | 6346   | 5193  | 0.0377045 | 0.000595  | 0.0041847 |
| Eso-AdenoCa      | 2e69c886-535b-4ff0-9236-abf67  | SBS1  | SBS3  | 984    | 4140  | 0.0950778 | 1.14E-06  | 1.38E-05  |
| Eso-AdenoCa      | 2e69c886-535b-4ff0-9236-abf67  | SBS1  | SBS9  | 984    | 5875  | 0.0944615 | 5.87E-07  | 7.40E-06  |
| Eso-AdenoCa      | 2e69c886-535b-4ff0-9236-abf67  | SBS1  | SBS17 | 984    | 9426  | 0.0785283 | 3.38E-05  | 0.0003181 |
| Eso-AdenoCa      | 2e69c886-535b-4ff0-9236-abf67  | SBS9  | SBS17 | 5875   | 9426  | 0.0282651 | 0.0061595 | 0.0305325 |
| Breast-LobularCa | fc8130e0-a38a-23b9-e040-11ac   | SBS1  | SBS8  | 463    | 8585  | 0.1110056 | 3.97E-05  | 0.0003686 |
| Breast-LobularCa | fc8130e0-a38a-23b9-e040-11ac   | SBS1  | SBS11 | 463    | 972   | 0.1156663 | 0.0004536 | 0.003313  |
| Skin-Melanoma    | bcf76f1a-7109-422d-94c9-5e83   | SBS1  | SBS13 | 1816   | 1057  | 0.0880984 | 6.27E-05  | 0.0005538 |
| Skin-Melanoma    | bcf76f1a-7109-422d-94c9-5e83   | SBS1  | SBS16 | 1816   | 3873  | 0.0589039 | 0.000376  | 0.0028049 |
| Prost-AdenoCA    | 0bfeb9f-c781-e57d-e050-11ac    | SBS1  | SBS16 | 1854   | 1965  | 0.0615702 | 0.0014453 | 0.0090216 |
| Stomach-AdenoCA  | dbd834cb-b14f-4380-9741-f965   | SBS8  | SBS17 | 805    | 1870  | 0.0912612 | 0.0001698 | 0.0013525 |
| Stomach-AdenoCA  | dbd834cb-b14f-4380-9741-f965   | SBS13 | SBS17 | 914    | 1870  | 0.1343662 | 4.72E-10  | 8.40E-09  |
| CNS-Medullo      | 49fa7e44-c86f-4b1f-8849-e5fe5t | SBS1  | SBS11 | 2959   | 744   | 0.0696113 | 0.0062913 | 0.0310008 |
| Head-SCC         | 1ff155dd-deb4-44e0-b3a2-e487   | SBS1  | SBS2  | 1247   | 3368  | 0.0863629 | 2.54E-06  | 2.93E-05  |
| Head-SCC         | 1ff155dd-deb4-44e0-b3a2-e487   | SBS1  | SBS13 | 1247   | 3938  | 0.1023148 | 4.89E-09  | 7.82E-08  |
| Head-SCC         | 1ff155dd-deb4-44e0-b3a2-e487   | SBS2  | SBS3  | 3368   | 3620  | 0.0561111 | 3.39E-05  | 0.0003181 |
| Head-SCC         | 1ff155dd-deb4-44e0-b3a2-e487   | SBS3  | SBS13 | 3620   | 3938  | 0.0708139 | 1.22E-08  | 1.87E-07  |
| Panc-AdenoCA     | b54b9433-ec10-4cb5-a860-4555   | SBS1  | SBS3  | 5187   | 1122  | 0.0571771 | 0.004804  | 0.0249116 |
| Bone-Osteosarc   | f82d2146-70f5-8114-e040-11ac   | SBS1  | SBS2  | 202    | 988   | 0.1246843 | 0.010874  | 0.0485725 |
| Bone-Osteosarc   | f82d2146-70f5-8114-e040-11ac   | SBS2  | SBS5  | 988    | 1850  | 0.0876562 | 0.0001006 | 0.0008511 |
| Skin-Melanoma    | 51893d3f-e7f3-43f9-9fd0-c0f25a | SBS7  | SBS11 | 323008 | 12897 | 0.0169879 | 0.0015572 | 0.0096335 |
| Head-SCC         | fb8b5ff5-4164-4276-b75b-b0ee6  | SBS1  | SBS2  | 2641   | 2103  | 0.0496771 | 0.0061874 | 0.0306293 |
| Bone-Osteosarc   | f85add3d-e2e6-31f8-e040-11ac   | SBS1  | SBS3  | 486    | 13460 | 0.0843163 | 0.0025384 | 0.0145546 |
| Prost-AdenoCA    | 07531318-87e8-4db8-aa61-9b9    | SBS1  | SBS12 | 2472   | 634   | 0.07963   | 0.0033261 | 0.0183328 |
| Prost-AdenoCA    | 07531318-87e8-4db8-aa61-9b9    | SBS5  | SBS12 | 155    | 634   | 0.1460161 | 0.0098741 | 0.0448088 |
| Liver-HCC        | 19085f7d-e6a6-406f-bd09-520a   | SBS4  | SBS5  | 2293   | 6818  | 0.0516479 | 0.0002115 | 0.0016486 |
| Liver-HCC        | 19085f7d-e6a6-406f-bd09-520a   | SBS4  | SBS12 | 2293   | 1003  | 0.0966238 | 4.39E-06  | 4.80E-05  |
| Liver-HCC        | 19085f7d-e6a6-406f-bd09-520a   | SBS5  | SBS12 | 6818   | 1003  | 0.0606751 | 0.0031994 | 0.0177912 |
| Prost-AdenoCA    | c14b2c74-447b-4526-a6e9-415d   | SBS1  | SBS16 | 2044   | 999   | 0.0810997 | 0.0002934 | 0.0022291 |
| Bone-Osteosarc   | f843ed5c-0336-3d33-e040-11ac   | SBS4  | SBS14 | 1090   | 185   | 0.1364493 | 0.0055381 | 0.027967  |
| Panc-AdenoCA     | 94652d14-2e4d-4f4a-a4f7-8df77  | SBS1  | SBS3  | 2455   | 492   | 0.0927964 | 0.0017197 | 0.0104838 |
| Panc-AdenoCA     | 8be6b14d-286a-471b-a282-ab9    | SBS1  | SBS2  | 1955   | 408   | 0.183312  | 2.81E-10  | 5.06E-09  |
| Panc-AdenoCA     | 8be6b14d-286a-471b-a282-ab9    | SBS1  | SBS5  | 1955   | 1100  | 0.0690235 | 0.0024438 | 0.0141507 |
| Panc-AdenoCA     | 8be6b14d-286a-471b-a282-ab9    | SBS2  | SBS5  | 408    | 1100  | 0.1422193 | 1.18E-05  | 0.0001198 |
| Panc-AdenoCA     | 8be6b14d-286a-471b-a282-ab9    | SBS2  | SBS6  | 408    | 364   | 0.1384131 | 0.0012584 | 0.0080149 |
| Panc-AdenoCA     | 8be6b14d-286a-471b-a282-ab9    | SBS2  | SBS7  | 408    | 207   | 0.1684783 | 0.0008227 | 0.005491  |
| Lymph-BNHL       | 5bcf473f-417d-47a5-9745-ac7fa  | SBS1  | SBS5  | 698    | 4895  | 0.0893277 | 0.0001167 | 0.0009699 |
| Lymph-BNHL       | 5bcf473f-417d-47a5-9745-ac7fa  | SBS1  | SBS8  | 698    | 2621  | 0.0969375 | 6.34E-05  | 0.0005596 |
| Liver-HCC        | c271b7d2-c622-11e3-bf01-24c6   | SBS1  | SBS13 | 218    | 285   | 0.1687591 | 0.0017601 | 0.0106938 |

|                |                               |       |       |        |       |           |           |           |
|----------------|-------------------------------|-------|-------|--------|-------|-----------|-----------|-----------|
| Liver-HCC      | c271b7d2-c622-11e3-bf01-24c6f | SBS1  | SBS17 | 218    | 349   | 0.1408612 | 0.0097377 | 0.0444472 |
| Liver-HCC      | 532259b8-c622-11e3-bf01-24c6f | SBS5  | SBS8  | 12641  | 15388 | 0.0363489 | 2.17E-08  | 3.22E-07  |
| Liver-HCC      | 532259b8-c622-11e3-bf01-24c6f | SBS5  | SBS9  | 12641  | 1065  | 0.0563595 | 0.0038997 | 0.0209063 |
| Panc-AdenoCA   | 0fbd94b1-bb34-4620-841b-861a  | SBS1  | SBS3  | 3412   | 2252  | 0.0522938 | 0.0011987 | 0.007697  |
| Panc-AdenoCA   | 0fbd94b1-bb34-4620-841b-861a  | SBS1  | SBS7  | 3412   | 676   | 0.0707076 | 0.0070939 | 0.0343832 |
| Panc-AdenoCA   | 0fbd94b1-bb34-4620-841b-861a  | SBS1  | SBS17 | 3412   | 2854  | 0.1183253 | 0         | 0         |
| Panc-AdenoCA   | 0fbd94b1-bb34-4620-841b-861a  | SBS3  | SBS7  | 2252   | 676   | 0.1052083 | 2.01E-05  | 0.0001958 |
| Panc-AdenoCA   | 0fbd94b1-bb34-4620-841b-861a  | SBS3  | SBS17 | 2252   | 2854  | 0.0728329 | 3.17E-06  | 3.57E-05  |
| Panc-AdenoCA   | 0fbd94b1-bb34-4620-841b-861a  | SBS6  | SBS7  | 722    | 676   | 0.1009687 | 0.0016202 | 0.0099448 |
| Panc-AdenoCA   | 0fbd94b1-bb34-4620-841b-861a  | SBS6  | SBS17 | 722    | 2854  | 0.1030308 | 9.73E-06  | 0.0001004 |
| Panc-AdenoCA   | 0fbd94b1-bb34-4620-841b-861a  | SBS7  | SBS17 | 676    | 2854  | 0.1678004 | 8.59E-14  | 2.10E-12  |
| Liver-HCC      | 34030a28-c622-11e3-bf01-24c6f | SBS8  | SBS12 | 1986   | 7092  | 0.0749259 | 5.44E-08  | 7.78E-07  |
| Lymph-NOS      | 1494bb16-f1f0-42a4-b10e-c383f | SBS1  | SBS3  | 546    | 8401  | 0.0938882 | 0.0002375 | 0.0018375 |
| Lymph-NOS      | 1494bb16-f1f0-42a4-b10e-c383f | SBS1  | SBS9  | 546    | 1630  | 0.1401582 | 2.10E-07  | 2.84E-06  |
| Lymph-NOS      | 1494bb16-f1f0-42a4-b10e-c383f | SBS1  | SBS12 | 546    | 119   | 0.2207498 | 0.0001464 | 0.0011945 |
| Lymph-NOS      | 1494bb16-f1f0-42a4-b10e-c383f | SBS3  | SBS9  | 8401   | 1630  | 0.0559065 | 0.0003935 | 0.0029255 |
| Lymph-NOS      | 1494bb16-f1f0-42a4-b10e-c383f | SBS6  | SBS9  | 259    | 1630  | 0.1333112 | 0.0007098 | 0.0048354 |
| Lymph-NOS      | 1494bb16-f1f0-42a4-b10e-c383f | SBS6  | SBS12 | 259    | 119   | 0.2048603 | 0.002132  | 0.0125692 |
| Liver-HCC      | 30a8f292-c623-11e3-bf01-24c6f | SBS1  | SBS5  | 298    | 1507  | 0.1271093 | 0.0006448 | 0.0044803 |
| Liver-HCC      | 30a8f292-c623-11e3-bf01-24c6f | SBS1  | SBS11 | 298    | 1140  | 0.1161839 | 0.003397  | 0.0186421 |
| Liver-HCC      | 30a8f292-c623-11e3-bf01-24c6f | SBS4  | SBS5  | 1949   | 1507  | 0.0686347 | 0.0006663 | 0.0045985 |
| Liver-HCC      | 30a8f292-c623-11e3-bf01-24c6f | SBS4  | SBS12 | 1949   | 4032  | 0.052687  | 0.0013585 | 0.0085739 |
| Liver-HCC      | 30a8f292-c623-11e3-bf01-24c6f | SBS5  | SBS12 | 1507   | 4032  | 0.1027916 | 1.71E-10  | 3.11E-09  |
| Liver-HCC      | 30a8f292-c623-11e3-bf01-24c6f | SBS11 | SBS12 | 1140   | 4032  | 0.0967314 | 1.20E-07  | 1.65E-06  |
| Panc-AdenoCA   | 53534b3c-cd15-4d68-a9b1-6902  | SBS1  | SBS3  | 4490   | 6520  | 0.0456847 | 3.03E-05  | 0.0002869 |
| Panc-AdenoCA   | 01b0848c-ae36-4ade-a3da-d297  | SBS3  | SBS4  | 26378  | 2858  | 0.0322685 | 0.0093083 | 0.0428936 |
| Panc-AdenoCA   | 01b0848c-ae36-4ade-a3da-d297  | SBS3  | SBS6  | 26378  | 4050  | 0.1038443 | 0         | 0         |
| Panc-AdenoCA   | 01b0848c-ae36-4ade-a3da-d297  | SBS4  | SBS6  | 2858   | 4050  | 0.092105  | 9.01E-13  | 1.98E-11  |
| Eso-AdenoCa    | 42629ae0-9410-4fac-8df1-2c27f | SBS15 | SBS17 | 1705   | 45213 | 0.1162718 | 0         | 0         |
| Panc-AdenoCA   | a3edc9cc-f54a-4459-a5d0-0978f | SBS1  | SBS8  | 3108   | 720   | 0.0714125 | 0.0051475 | 0.0263937 |
| Eso-AdenoCa    | b757a040-3c9e-45e7-a045-9cd0  | SBS2  | SBS8  | 4407   | 6956  | 0.0433639 | 7.85E-05  | 0.0006783 |
| Eso-AdenoCa    | b757a040-3c9e-45e7-a045-9cd0  | SBS2  | SBS17 | 4407   | 42227 | 0.0612824 | 1.92E-13  | 4.50E-12  |
| Eso-AdenoCa    | b757a040-3c9e-45e7-a045-9cd0  | SBS8  | SBS17 | 6956   | 42227 | 0.0346519 | 1.18E-06  | 1.43E-05  |
| Liver-HCC      | 10db2142-c623-11e3-bf01-24c6f | SBS3  | SBS12 | 1193   | 4169  | 0.0542205 | 0.0085597 | 0.0400324 |
| Liver-HCC      | 10db2142-c623-11e3-bf01-24c6f | SBS4  | SBS12 | 1720   | 4169  | 0.0589335 | 0.0004244 | 0.0031214 |
| Lymph-BNHL     | 282b45ee-4af2-4c61-9acc-286ef | SBS1  | SBS9  | 2797   | 1473  | 0.0679729 | 0.0002685 | 0.0020517 |
| Lymph-BNHL     | 282b45ee-4af2-4c61-9acc-286ef | SBS9  | SBS14 | 1473   | 645   | 0.0988554 | 0.0003115 | 0.0023575 |
| Lymph-BNHL     | 124d5b04-4588-44c3-9c00-61e0  | SBS5  | SBS7  | 3625   | 782   | 0.0682328 | 0.00501   | 0.0258416 |
| Lymph-BNHL     | 124d5b04-4588-44c3-9c00-61e0  | SBS5  | SBS8  | 3625   | 4318  | 0.0438159 | 0.0010349 | 0.0067772 |
| Panc-AdenoCA   | 31c75873-abb4-4d88-9e2f-0749  | SBS1  | SBS2  | 5465   | 1762  | 0.1531097 | 0         | 0         |
| Panc-AdenoCA   | 31c75873-abb4-4d88-9e2f-0749  | SBS1  | SBS17 | 5465   | 1870  | 0.1414074 | 0         | 0         |
| Panc-AdenoCA   | 31c75873-abb4-4d88-9e2f-0749  | SBS2  | SBS4  | 1762   | 558   | 0.1427142 | 6.37E-08  | 9.00E-07  |
| Panc-AdenoCA   | 31c75873-abb4-4d88-9e2f-0749  | SBS2  | SBS8  | 1762   | 1843  | 0.1595561 | 0         | 0         |
| Panc-AdenoCA   | 31c75873-abb4-4d88-9e2f-0749  | SBS2  | SBS17 | 1762   | 1870  | 0.2912939 | 0         | 0         |
| Panc-AdenoCA   | 31c75873-abb4-4d88-9e2f-0749  | SBS4  | SBS17 | 558    | 1870  | 0.1570927 | 1.23E-09  | 2.09E-08  |
| Panc-AdenoCA   | 31c75873-abb4-4d88-9e2f-0749  | SBS8  | SBS17 | 1843   | 1870  | 0.1390093 | 5.55E-16  | 1.65E-14  |
| Lymph-BNHL     | 4a4309b0-2aca-4d6a-ac50-039b  | SBS1  | SBS9  | 2338   | 2628  | 0.0543557 | 0.0013361 | 0.0084496 |
| Lymph-BNHL     | 4a4309b0-2aca-4d6a-ac50-039b  | SBS1  | SBS12 | 2338   | 817   | 0.0729096 | 0.0032032 | 0.0177965 |
| Kidney-RCC     | 959efb81-1d56-4659-9b7a-09f2f | SBS1  | SBS3  | 394    | 973   | 0.2067967 | 7.66E-11  | 1.44E-09  |
| Kidney-RCC     | 959efb81-1d56-4659-9b7a-09f2f | SBS1  | SBS8  | 394    | 2666  | 0.172069  | 2.97E-09  | 4.86E-08  |
| Kidney-RCC     | 959efb81-1d56-4659-9b7a-09f2f | SBS1  | SBS11 | 394    | 528   | 0.1234137 | 0.0020704 | 0.0122872 |
| Kidney-RCC     | 959efb81-1d56-4659-9b7a-09f2f | SBS3  | SBS11 | 973    | 528   | 0.0987554 | 0.0025216 | 0.0144978 |
| Liver-HCC      | 8a6d6b2e-c622-11e3-bf01-24c6f | SBS1  | SBS8  | 337    | 5842  | 0.0955361 | 0.0059579 | 0.0297573 |
| Liver-HCC      | 8a6d6b2e-c622-11e3-bf01-24c6f | SBS4  | SBS8  | 750    | 5842  | 0.0679817 | 0.0042945 | 0.0226166 |
| Skin-Melanoma  | deb9fbb6-656b-41ce-8299-554ef | SBS7  | SBS11 | 450378 | 27093 | 0.0190653 | 1.71E-08  | 2.58E-07  |
| Panc-AdenoCA   | 2b3837b3-ee29-4a08-848e-120f  | SBS1  | SBS2  | 2519   | 486   | 0.0836311 | 0.0066998 | 0.0327262 |
| Panc-AdenoCA   | 2b3837b3-ee29-4a08-848e-120f  | SBS2  | SBS5  | 486    | 1179  | 0.1068859 | 0.0007692 | 0.0051777 |
| Panc-AdenoCA   | e5193d7e-e8b7-4098-bf98-8b3a  | SBS1  | SBS7  | 4884   | 378   | 0.0958426 | 0.003175  | 0.0176867 |
| Liver-HCC      | b994762c-c622-11e3-bf01-24c6f | SBS3  | SBS12 | 1756   | 8275  | 0.060516  | 4.93E-05  | 0.0004461 |
| Liver-HCC      | b994762c-c622-11e3-bf01-24c6f | SBS4  | SBS12 | 2015   | 8275  | 0.0423423 | 0.0059925 | 0.0298767 |
| Liver-HCC      | b994762c-c622-11e3-bf01-24c6f | SBS4  | SBS16 | 8275   | 7460  | 0.0386086 | 1.67E-05  | 0.0001644 |
| Breast-AdenoCa | fc447d55-95d8-0b34-e040-11acf | SBS2  | SBS12 | 989    | 310   | 0.1130337 | 0.0048058 | 0.0249116 |
| Skin-Melanoma  | ca004926-f3ac-4824-8ed5-d84ef | SBS1  | SBS13 | 268    | 918   | 0.120094  | 0.0050393 | 0.0259075 |
| Skin-Melanoma  | ca004926-f3ac-4824-8ed5-d84ef | SBS3  | SBS13 | 2898   | 918   | 0.0684042 | 0.002935  | 0.0164963 |

|                 |                                |       |       |       |       |           |           |           |
|-----------------|--------------------------------|-------|-------|-------|-------|-----------|-----------|-----------|
| Skin-Melanoma   | ca004926-f3ac-4824-8ed5-d84e1  | SBS13 | SBS15 | 918   | 210   | 0.1555867 | 0.00051   | 0.003657  |
| Eso-AdenoCa     | 96a2896c-1e32-4827-a526-6b71   | SBS9  | SBS17 | 2018  | 35533 | 0.0592037 | 3.07E-06  | 3.47E-05  |
| Ovary-AdenoCA   | 25f73b03-4ba8-47ba-ad80-6ccb1  | SBS1  | SBS3  | 4509  | 7229  | 0.0320047 | 0.0067672 | 0.0330297 |
| Liver-HCC       | 520b8ab2-c623-11e3-bf01-24c61  | SBS5  | SBS12 | 4871  | 7601  | 0.0459222 | 7.30E-06  | 7.69E-05  |
| Liver-HCC       | 520b8ab2-c623-11e3-bf01-24c61  | SBS12 | SBS15 | 7601  | 967   | 0.0611741 | 0.003255  | 0.0180204 |
| Prost-AdenoCA   | f9c3eaad-a0d9-8bf8-e040-11ac1  | SBS1  | SBS3  | 259   | 1247  | 0.1161645 | 0.0061291 | 0.0304364 |
| Prost-AdenoCA   | f9c3eaad-a0d9-8bf8-e040-11ac1  | SBS1  | SBS8  | 259   | 1487  | 0.1655168 | 1.13E-05  | 0.0001149 |
| Prost-AdenoCA   | f9c3eaad-a0d9-8bf8-e040-11ac1  | SBS1  | SBS11 | 259   | 592   | 0.1206564 | 0.0105378 | 0.047409  |
| Prost-AdenoCA   | f9c3eaad-a0d9-8bf8-e040-11ac1  | SBS8  | SBS15 | 1487  | 536   | 0.0961605 | 0.0013698 | 0.0086364 |
| Lymph-BNHL      | 3e94aa64-7dd3-4d63-a5de-b40f   | SBS6  | SBS9  | 821   | 2151  | 0.0663086 | 0.0107584 | 0.0481593 |
| Panc-AdenoCA    | e4c8c7f0-5bac-4d59-91c4-c9821  | SBS1  | SBS3  | 672   | 7898  | 0.1568326 | 1.17E-13  | 2.81E-12  |
| Panc-AdenoCA    | 02c97e2b-914e-4afc-bf50-78f0c1 | SBS1  | SBS4  | 1063  | 459   | 0.1151364 | 0.0004072 | 0.0030093 |
| Panc-AdenoCA    | 02c97e2b-914e-4afc-bf50-78f0c1 | SBS1  | SBS8  | 1063  | 1101  | 0.0942895 | 0.0001332 | 0.0010972 |
| Panc-AdenoCA    | 96cca60e-17dc-44c3-90f7-1b571  | SBS1  | SBS5  | 3958  | 171   | 0.1430296 | 0.0024454 | 0.0141507 |
| Lymph-BNHL      | 232b7754-b3c3-4530-9d24-3af41  | SBS1  | SBS8  | 487   | 366   | 0.1365335 | 0.0008272 | 0.0055152 |
| Lymph-BNHL      | 232b7754-b3c3-4530-9d24-3af41  | SBS1  | SBS9  | 487   | 3010  | 0.0961108 | 0.0008665 | 0.0057405 |
| Liver-HCC       | cc792058-c622-11e3-bf01-24c61  | SBS3  | SBS4  | 1371  | 2563  | 0.1004037 | 3.02E-08  | 4.43E-07  |
| Liver-HCC       | cc792058-c622-11e3-bf01-24c61  | SBS4  | SBS12 | 2563  | 5543  | 0.0977568 | 5.66E-15  | 1.52E-13  |
| Liver-HCC       | a846f5e8-c622-11e3-bf01-24c61  | SBS4  | SBS17 | 3688  | 1417  | 0.1213145 | 1.64E-13  | 3.87E-12  |
| Liver-HCC       | a846f5e8-c622-11e3-bf01-24c61  | SBS11 | SBS17 | 1177  | 1417  | 0.1420936 | 1.06E-11  | 2.08E-10  |
| Liver-HCC       | a846f5e8-c622-11e3-bf01-24c61  | SBS12 | SBS17 | 4628  | 1417  | 0.1475621 | 0         | 0         |
| Lymph-CLL       | 915cbb43-9e00-433d-818f-5310   | SBS1  | SBS17 | 900   | 719   | 0.1860238 | 1.94E-12  | 4.16E-11  |
| Lymph-CLL       | 915cbb43-9e00-433d-818f-5310   | SBS8  | SBS17 | 1452  | 719   | 0.1685058 | 2.76E-12  | 5.81E-11  |
| Lymph-CLL       | 915cbb43-9e00-433d-818f-5310   | SBS12 | SBS17 | 818   | 719   | 0.1409558 | 4.98E-07  | 6.36E-06  |
| Liver-HCC       | f410b432-c622-11e3-bf01-24c61  | SBS8  | SBS9  | 3715  | 792   | 0.06729   | 0.0054141 | 0.0275405 |
| Liver-HCC       | f410b432-c622-11e3-bf01-24c61  | SBS8  | SBS16 | 3715  | 3258  | 0.0423655 | 0.0039357 | 0.0210276 |
| Panc-AdenoCA    | 12f038e1-00af-4c64-a2e0-9e631  | SBS1  | SBS3  | 1263  | 1283  | 0.1639313 | 2.78E-15  | 7.77E-14  |
| Panc-AdenoCA    | 12f038e1-00af-4c64-a2e0-9e631  | SBS1  | SBS8  | 1263  | 3684  | 0.0714917 | 0.0001335 | 0.0010981 |
| Panc-AdenoCA    | 12f038e1-00af-4c64-a2e0-9e631  | SBS1  | SBS15 | 1263  | 978   | 0.0739791 | 0.0047956 | 0.0249116 |
| Panc-AdenoCA    | 12f038e1-00af-4c64-a2e0-9e631  | SBS3  | SBS6  | 1283  | 546   | 0.1167822 | 5.81E-05  | 0.0005186 |
| Panc-AdenoCA    | 12f038e1-00af-4c64-a2e0-9e631  | SBS3  | SBS7  | 1283  | 1134  | 0.1262308 | 9.33E-09  | 1.44E-07  |
| Panc-AdenoCA    | 12f038e1-00af-4c64-a2e0-9e631  | SBS3  | SBS8  | 1283  | 3684  | 0.104755  | 1.70E-09  | 2.84E-08  |
| Panc-AdenoCA    | 12f038e1-00af-4c64-a2e0-9e631  | SBS3  | SBS15 | 1283  | 978   | 0.1261375 | 4.28E-08  | 6.18E-07  |
| Eso-AdenoCa     | 31f3ff14-7d74-447c-a5da-9ad83  | SBS1  | SBS17 | 11595 | 13297 | 0.0898031 | 0         | 0         |
| Eso-AdenoCa     | 31f3ff14-7d74-447c-a5da-9ad83  | SBS5  | SBS17 | 7428  | 13297 | 0.0760805 | 0         | 0         |
| Kidney-RCC      | f37971bd-ec65-4840-8d4f-67861  | SBS1  | SBS5  | 154   | 1906  | 0.1874872 | 8.92E-05  | 0.000763  |
| Kidney-RCC      | f37971bd-ec65-4840-8d4f-67861  | SBS5  | SBS11 | 1906  | 426   | 0.1271571 | 2.58E-05  | 0.0002485 |
| Lymph-CLL       | 8cce153d-953d-40c5-976b-60f61  | SBS1  | SBS9  | 600   | 974   | 0.0884771 | 0.0059772 | 0.029824  |
| Lymph-CLL       | 8cce153d-953d-40c5-976b-60f61  | SBS5  | SBS9  | 1500  | 974   | 0.117117  | 1.84E-07  | 2.50E-06  |
| Lymph-CLL       | 8cce153d-953d-40c5-976b-60f61  | SBS6  | SBS9  | 229   | 974   | 0.1675663 | 6.01E-05  | 0.0005361 |
| Lymph-BNHL      | abedd46c-47b8-4242-adb6-1281   | SBS6  | SBS9  | 4497  | 11948 | 0.047841  | 6.39E-07  | 7.95E-06  |
| Lymph-BNHL      | abedd46c-47b8-4242-adb6-1281   | SBS6  | SBS17 | 4497  | 4876  | 0.0456618 | 0.000116  | 0.0009651 |
| Liver-HCC       | b2d9aaff-5a48-48f0-bf55-bfd4dd | SBS1  | SBS8  | 354   | 1272  | 0.0983371 | 0.0094402 | 0.0434027 |
| Liver-HCC       | b2d9aaff-5a48-48f0-bf55-bfd4dd | SBS1  | SBS12 | 354   | 1181  | 0.1697355 | 3.06E-07  | 4.00E-06  |
| Liver-HCC       | b2d9aaff-5a48-48f0-bf55-bfd4dd | SBS1  | SBS16 | 354   | 1565  | 0.1272757 | 0.0001734 | 0.0013788 |
| Liver-HCC       | b2d9aaff-5a48-48f0-bf55-bfd4dd | SBS3  | SBS12 | 812   | 1181  | 0.1076684 | 2.86E-05  | 0.0002718 |
| Liver-HCC       | b2d9aaff-5a48-48f0-bf55-bfd4dd | SBS8  | SBS12 | 1272  | 1181  | 0.0879431 | 0.0001538 | 0.0012409 |
| Breast-AdenoCa  | fc8130e5-18b8-ef38-e040-11ac1  | SBS1  | SBS13 | 1844  | 598   | 0.0834162 | 0.0037313 | 0.0201759 |
| Panc-AdenoCA    | 2bf5b018-9f19-4fbd-9e1f-7d9581 | SBS1  | SBS3  | 618   | 10749 | 0.1073006 | 2.86E-06  | 3.27E-05  |
| Panc-AdenoCA    | 2bf5b018-9f19-4fbd-9e1f-7d9581 | SBS1  | SBS4  | 618   | 159   | 0.157019  | 0.0039157 | 0.0209564 |
| Panc-AdenoCA    | 2bf5b018-9f19-4fbd-9e1f-7d9581 | SBS1  | SBS13 | 618   | 1553  | 0.1199797 | 5.94E-06  | 6.33E-05  |
| Panc-AdenoCA    | 2bf5b018-9f19-4fbd-9e1f-7d9581 | SBS3  | SBS6  | 10749 | 1666  | 0.0722808 | 5.69E-07  | 7.21E-06  |
| Panc-AdenoCA    | 2bf5b018-9f19-4fbd-9e1f-7d9581 | SBS6  | SBS13 | 1666  | 1553  | 0.0887219 | 6.39E-06  | 6.78E-05  |
| Breast-AdenoCa  | fc9dbf68-4599-3c64-e040-11ac1  | SBS1  | SBS3  | 287   | 2298  | 0.1093877 | 0.0044601 | 0.0233512 |
| Kidney-RCC      | f6e758a5-150f-4424-90b7-1c1a1  | SBS3  | SBS8  | 1898  | 1545  | 0.0637015 | 0.0019911 | 0.0118727 |
| Breast-AdenoCa  | fc8130e0-096a-b991-e040-11ac1  | SBS2  | SBS13 | 24143 | 12065 | 0.0216203 | 0.0010834 | 0.007065  |
| Lymph-BNHL      | ce85ccf3-6621-4976-b187-2f28d  | SBS3  | SBS7  | 7125  | 3105  | 0.0508307 | 2.80E-05  | 0.0002678 |
| Lymph-BNHL      | ce85ccf3-6621-4976-b187-2f28d  | SBS7  | SBS15 | 3105  | 2658  | 0.0441166 | 0.0075872 | 0.036408  |
| Stomach-AdenoCA | 37e5d47b-851b-47de-ba6a-fd28   | SBS8  | SBS17 | 537   | 2171  | 0.0777242 | 0.0110166 | 0.0490698 |
| Eso-AdenoCa     | 3a551616-4840-4111-a8c5-b4ae   | SBS5  | SBS6  | 1332  | 1028  | 0.0983863 | 2.65E-05  | 0.0002544 |
| Eso-AdenoCa     | 3a551616-4840-4111-a8c5-b4ae   | SBS5  | SBS17 | 1332  | 2293  | 0.0753632 | 0.0001395 | 0.0011411 |
| Eso-AdenoCa     | 3a551616-4840-4111-a8c5-b4ae   | SBS6  | SBS9  | 1028  | 673   | 0.1360408 | 5.79E-07  | 7.32E-06  |
| Eso-AdenoCa     | 3a551616-4840-4111-a8c5-b4ae   | SBS6  | SBS17 | 1028  | 2293  | 0.1684996 | 0         | 0         |
| Eso-AdenoCa     | 3a551616-4840-4111-a8c5-b4ae   | SBS13 | SBS17 | 469   | 2293  | 0.1064917 | 0.0002922 | 0.0022226 |

|                 |                               |       |       |        |       |           |           |           |
|-----------------|-------------------------------|-------|-------|--------|-------|-----------|-----------|-----------|
| Liver-HCC       | 53df19a8-c623-11e3-bf01-24c65 | SBS4  | SBS5  | 7964   | 6996  | 0.0488085 | 3.93E-08  | 5.72E-07  |
| Liver-HCC       | 53df19a8-c623-11e3-bf01-24c65 | SBS5  | SBS9  | 6996   | 524   | 0.1012443 | 9.14E-05  | 0.0007758 |
| Lymph-BNHL      | 0e7f46ca-6f5c-4538-b6d6-00af6 | SBS3  | SBS6  | 4391   | 3494  | 0.053593  | 2.80E-05  | 0.0002677 |
| Lymph-BNHL      | 0e7f46ca-6f5c-4538-b6d6-00af6 | SBS3  | SBS9  | 4391   | 5501  | 0.067267  | 5.06E-10  | 8.88E-09  |
| Lymph-BNHL      | 0e7f46ca-6f5c-4538-b6d6-00af6 | SBS6  | SBS17 | 3494   | 37873 | 0.067326  | 5.09E-13  | 1.15E-11  |
| Lymph-BNHL      | 0e7f46ca-6f5c-4538-b6d6-00af6 | SBS9  | SBS17 | 5501   | 37873 | 0.0798644 | 0         | 0         |
| Kidney-RCC      | b7fbd99c-dea0-4448-a430-7f94c | SBS1  | SBS3  | 328    | 1304  | 0.1183226 | 0.0013003 | 0.0082562 |
| Kidney-RCC      | b7fbd99c-dea0-4448-a430-7f94c | SBS1  | SBS9  | 328    | 772   | 0.1233887 | 0.0018067 | 0.0109189 |
| Skin-Melanoma   | 25103371-28ac-4f43-b0e2-2d37f | SBS7  | SBS11 | 312810 | 5008  | 0.0526952 | 2.59E-12  | 5.48E-11  |
| Panc-AdenoCA    | 1327bbd4-a466-4e26-905f-cf913 | SBS1  | SBS7  | 3459   | 274   | 0.1061465 | 0.0065518 | 0.0320783 |
| Panc-AdenoCA    | 1327bbd4-a466-4e26-905f-cf913 | SBS1  | SBS16 | 3459   | 676   | 0.0697396 | 0.0081686 | 0.0386358 |
| Skin-Melanoma   | eb9a8f12-6451-43cc-95b3-2e86f | SBS3  | SBS14 | 1876   | 829   | 0.0741221 | 0.0036089 | 0.0197002 |
| Skin-Melanoma   | eb9a8f12-6451-43cc-95b3-2e86f | SBS3  | SBS17 | 1876   | 11546 | 0.0415192 | 0.007668  | 0.0367678 |
| Skin-Melanoma   | eb9a8f12-6451-43cc-95b3-2e86f | SBS4  | SBS6  | 2870   | 1291  | 0.0645263 | 0.0012042 | 0.0077246 |
| Skin-Melanoma   | eb9a8f12-6451-43cc-95b3-2e86f | SBS6  | SBS14 | 1291   | 829   | 0.0970998 | 0.0001468 | 0.0011965 |
| Skin-Melanoma   | eb9a8f12-6451-43cc-95b3-2e86f | SBS6  | SBS17 | 1291   | 11546 | 0.065208  | 0.0001029 | 0.0008662 |
| Ovary-AdenoCA   | acd510de-b732-4a1a-8b72-6d22  | SBS3  | SBS12 | 2365   | 1790  | 0.051836  | 0.0083781 | 0.0393843 |
| Lymph-BNHL      | fce8d8c6-f2a0-43a8-9a7a-b9c51 | SBS1  | SBS3  | 1402   | 11644 | 0.0512594 | 0.0027873 | 0.015794  |
| Lymph-BNHL      | fce8d8c6-f2a0-43a8-9a7a-b9c51 | SBS1  | SBS8  | 1402   | 3393  | 0.0609808 | 0.0012492 | 0.0079806 |
| Lymph-BNHL      | fce8d8c6-f2a0-43a8-9a7a-b9c51 | SBS1  | SBS9  | 1402   | 1210  | 0.068845  | 0.0042393 | 0.022382  |
| Lymph-BNHL      | fce8d8c6-f2a0-43a8-9a7a-b9c51 | SBS2  | SBS9  | 8049   | 1210  | 0.0561838 | 0.0026122 | 0.0149366 |
| Lymph-BNHL      | fce8d8c6-f2a0-43a8-9a7a-b9c51 | SBS3  | SBS17 | 11644  | 6381  | 0.0300398 | 0.0011752 | 0.0075625 |
| Lymph-BNHL      | fce8d8c6-f2a0-43a8-9a7a-b9c51 | SBS8  | SBS17 | 3393   | 6381  | 0.0404957 | 0.0013989 | 0.0087792 |
| Lymph-BNHL      | fce8d8c6-f2a0-43a8-9a7a-b9c51 | SBS9  | SBS11 | 1210   | 5499  | 0.0578911 | 0.0025943 | 0.0148478 |
| Lymph-BNHL      | fce8d8c6-f2a0-43a8-9a7a-b9c51 | SBS9  | SBS17 | 1210   | 6381  | 0.0696848 | 0.0001026 | 0.000865  |
| Lymph-BNHL      | 2b02e3ad-4423-491e-993a-561e  | SBS6  | SBS12 | 1020   | 726   | 0.0825717 | 0.0061563 | 0.0305325 |
| Lymph-BNHL      | 2b02e3ad-4423-491e-993a-561e  | SBS6  | SBS17 | 1020   | 1619  | 0.089966  | 7.98E-05  | 0.0006885 |
| Lymph-BNHL      | 2b02e3ad-4423-491e-993a-561e  | SBS9  | SBS17 | 1723   | 1619  | 0.0659213 | 0.001414  | 0.0088436 |
| Liver-HCC       | 8d7592e2-c622-11e3-bf01-24c6f | SBS4  | SBS16 | 2833   | 2186  | 0.0495915 | 0.0046265 | 0.0241019 |
| Eso-AdenoCa     | ce799e7b-30e7-44a5-a185-3e5c  | SBS1  | SBS8  | 2088   | 2992  | 0.0470296 | 0.0086787 | 0.0404683 |
| Eso-AdenoCa     | ce799e7b-30e7-44a5-a185-3e5c  | SBS1  | SBS17 | 2088   | 3934  | 0.0461781 | 0.0059508 | 0.0297573 |
| Eso-AdenoCa     | ce799e7b-30e7-44a5-a185-3e5c  | SBS3  | SBS17 | 709    | 3934  | 0.0790738 | 0.0010926 | 0.0071103 |
| Eso-AdenoCa     | ce799e7b-30e7-44a5-a185-3e5c  | SBS8  | SBS17 | 2992   | 3934  | 0.0826389 | 1.66E-10  | 3.02E-09  |
| Liver-HCC       | d2b7bb0a-c622-11e3-bf01-24c6f | SBS4  | SBS12 | 2688   | 5037  | 0.0444849 | 0.0019428 | 0.0116179 |
| Eso-AdenoCa     | a284fe9d-9afd-4472-8d70-243c  | SBS1  | SBS2  | 5563   | 5362  | 0.0931861 | 0         | 0         |
| Eso-AdenoCa     | a284fe9d-9afd-4472-8d70-243c  | SBS1  | SBS8  | 5563   | 2458  | 0.0469748 | 0.0010804 | 0.0070533 |
| Eso-AdenoCa     | a284fe9d-9afd-4472-8d70-243c  | SBS1  | SBS13 | 5563   | 2942  | 0.0876956 | 2.80E-13  | 6.42E-12  |
| Eso-AdenoCa     | a284fe9d-9afd-4472-8d70-243c  | SBS2  | SBS8  | 5362   | 2458  | 0.0566289 | 4.04E-05  | 0.0003735 |
| Eso-AdenoCa     | a284fe9d-9afd-4472-8d70-243c  | SBS2  | SBS17 | 5362   | 12587 | 0.0783793 | 0         | 0         |
| Eso-AdenoCa     | a284fe9d-9afd-4472-8d70-243c  | SBS8  | SBS13 | 2458   | 2942  | 0.0479631 | 0.0042189 | 0.0222931 |
| Eso-AdenoCa     | a284fe9d-9afd-4472-8d70-243c  | SBS8  | SBS17 | 2458   | 12587 | 0.0359559 | 0.0098131 | 0.0446256 |
| Eso-AdenoCa     | a284fe9d-9afd-4472-8d70-243c  | SBS13 | SBS17 | 2942   | 12587 | 0.072773  | 2.15E-11  | 4.13E-10  |
| Prost-AdenoCA   | 48c33a30-557b-4ecf-8066-5b4b  | SBS1  | SBS3  | 935    | 485   | 0.1373394 | 1.17E-05  | 0.0001193 |
| Prost-AdenoCA   | 48c33a30-557b-4ecf-8066-5b4b  | SBS1  | SBS5  | 935    | 1380  | 0.157196  | 2.18E-12  | 4.64E-11  |
| Panc-AdenoCA    | ec77847e-48fd-4ba5-bc3e-3cd11 | SBS1  | SBS17 | 5589   | 396   | 0.1245059 | 2.10E-05  | 0.0002042 |
| Panc-AdenoCA    | ec77847e-48fd-4ba5-bc3e-3cd11 | SBS6  | SBS17 | 71     | 396   | 0.2417129 | 0.001761  | 0.0106938 |
| Panc-AdenoCA    | 96ba50eb-3c12-41ad-ac7b-d23b  | SBS1  | SBS6  | 5700   | 3043  | 0.0368184 | 0.0092277 | 0.0425849 |
| Panc-AdenoCA    | 96ba50eb-3c12-41ad-ac7b-d23b  | SBS1  | SBS9  | 5700   | 1178  | 0.0737521 | 4.88E-05  | 0.0004429 |
| Liver-HCC       | 030695f6-c623-11e3-bf01-24c6f | SBS2  | SBS4  | 1455   | 4972  | 0.147178  | 0         | 0         |
| Liver-HCC       | 030695f6-c623-11e3-bf01-24c6f | SBS2  | SBS9  | 1455   | 1157  | 0.0663572 | 0.0068557 | 0.0333835 |
| Liver-HCC       | 030695f6-c623-11e3-bf01-24c6f | SBS2  | SBS12 | 1455   | 4788  | 0.1888643 | 0         | 0         |
| Liver-HCC       | 030695f6-c623-11e3-bf01-24c6f | SBS3  | SBS4  | 246    | 4972  | 0.1992344 | 1.66E-08  | 2.51E-07  |
| Liver-HCC       | 030695f6-c623-11e3-bf01-24c6f | SBS3  | SBS9  | 246    | 1157  | 0.1188032 | 0.0065163 | 0.0319292 |
| Liver-HCC       | 030695f6-c623-11e3-bf01-24c6f | SBS3  | SBS12 | 246    | 4788  | 0.2338927 | 1.52E-11  | 2.96E-10  |
| Liver-HCC       | 030695f6-c623-11e3-bf01-24c6f | SBS4  | SBS9  | 4972   | 1157  | 0.0921666 | 2.38E-07  | 3.19E-06  |
| Liver-HCC       | 030695f6-c623-11e3-bf01-24c6f | SBS4  | SBS12 | 4972   | 4788  | 0.0500724 | 9.75E-06  | 0.0001005 |
| Liver-HCC       | 030695f6-c623-11e3-bf01-24c6f | SBS9  | SBS12 | 1157   | 4788  | 0.1354997 | 2.78E-15  | 7.77E-14  |
| Biliary-AdenoCA | e4fd1b3e-c622-11e3-bf01-24c6f | SBS5  | SBS8  | 2081   | 609   | 0.0773367 | 0.0071373 | 0.03454   |
| Panc-AdenoCA    | 0554ffe5-31f7-43f5-8372-2b73c | SBS1  | SBS2  | 955    | 703   | 0.1117589 | 8.09E-05  | 0.0006977 |
| Panc-AdenoCA    | 0554ffe5-31f7-43f5-8372-2b73c | SBS1  | SBS8  | 955    | 1891  | 0.1308391 | 7.34E-10  | 1.27E-08  |
| Panc-AdenoCA    | 0554ffe5-31f7-43f5-8372-2b73c | SBS1  | SBS12 | 955    | 397   | 0.1381592 | 4.48E-05  | 0.0004091 |
| Lymph-BNHL      | db9ce6c6-529c-4da6-92c4-f4f3f | SBS1  | SBS5  | 290    | 1853  | 0.1166422 | 0.0021763 | 0.0128066 |
| Lymph-BNHL      | db9ce6c6-529c-4da6-92c4-f4f3f | SBS1  | SBS9  | 290    | 1359  | 0.1329883 | 0.0004262 | 0.0031311 |
| Kidney-RCC      | a89a2341-263d-4e7f-87fa-18d9f | SBS1  | SBS3  | 550    | 3135  | 0.1265391 | 6.21E-07  | 7.77E-06  |

|                 |                                |       |       |       |       |           |           |           |
|-----------------|--------------------------------|-------|-------|-------|-------|-----------|-----------|-----------|
| Kidney-RCC      | a89a2341-263d-4e7f-87fa-18d9f  | SBS1  | SBS4  | 550   | 1869  | 0.1396556 | 1.27E-07  | 1.74E-06  |
| Kidney-RCC      | a89a2341-263d-4e7f-87fa-18d9f  | SBS1  | SBS16 | 550   | 1097  | 0.1046739 | 0.0006527 | 0.0045249 |
| Panc-AdenoCA    | 2102558b-87b0-447b-bb9a-e4ae   | SBS1  | SBS9  | 4359  | 578   | 0.0797233 | 0.0030459 | 0.017028  |
| Lymph-CLL       | ffa976f0-aa60-4867-842e-361af  | SBS5  | SBS9  | 1446  | 754   | 0.1891232 | 7.77E-16  | 2.29E-14  |
| Lymph-CLL       | 4808f9e1-452d-45eb-9b87-2f87c  | SBS3  | SBS9  | 1862  | 156   | 0.3133176 | 1.07E-12  | 2.33E-11  |
| Lymph-CLL       | 4808f9e1-452d-45eb-9b87-2f87c  | SBS3  | SBS16 | 1862  | 128   | 0.1612094 | 0.0039582 | 0.0211295 |
| Lymph-CLL       | 4808f9e1-452d-45eb-9b87-2f87c  | SBS9  | SBS12 | 156   | 468   | 0.2991453 | 1.61E-09  | 2.72E-08  |
| Panc-Endocrine  | d515c7d2-2314-46bf-9736-ff3f3c | SBS2  | SBS3  | 3181  | 1083  | 0.2381972 | 0         | 0         |
| Panc-Endocrine  | d515c7d2-2314-46bf-9736-ff3f3c | SBS2  | SBS16 | 3181  | 250   | 0.4155322 | 0         | 0         |
| Panc-Endocrine  | d515c7d2-2314-46bf-9736-ff3f3c | SBS3  | SBS13 | 1083  | 1497  | 0.2490466 | 0         | 0         |
| Panc-Endocrine  | d515c7d2-2314-46bf-9736-ff3f3c | SBS3  | SBS16 | 1083  | 250   | 0.1996122 | 1.87E-07  | 2.53E-06  |
| Panc-Endocrine  | d515c7d2-2314-46bf-9736-ff3f3c | SBS13 | SBS16 | 1497  | 250   | 0.4245157 | 0         | 0         |
| Ovary-AdenoCA   | bbb2cf2f-8f32-43d4-846c-d1020  | SBS3  | SBS6  | 2799  | 1518  | 0.0551474 | 0.0050249 | 0.0258738 |
| Panc-AdenoCA    | fa9a3247-a465-4fdf-bb64-5afaa  | SBS1  | SBS2  | 1550  | 338   | 0.1042565 | 0.0047999 | 0.0249116 |
| Panc-AdenoCA    | fa9a3247-a465-4fdf-bb64-5afaa  | SBS1  | SBS12 | 1550  | 293   | 0.1273698 | 0.0006741 | 0.004637  |
| Panc-AdenoCA    | fa9a3247-a465-4fdf-bb64-5afaa  | SBS1  | SBS15 | 1550  | 118   | 0.1661017 | 0.0047131 | 0.0245322 |
| Panc-AdenoCA    | fa9a3247-a465-4fdf-bb64-5afaa  | SBS5  | SBS12 | 86    | 293   | 0.2026748 | 0.0084896 | 0.0398236 |
| Skin-Melanoma   | 9e0009d1-c993-4247-9706-88e    | SBS1  | SBS3  | 722   | 11648 | 0.0828987 | 0.0001749 | 0.0013895 |
| Skin-Melanoma   | 9e0009d1-c993-4247-9706-88e    | SBS1  | SBS12 | 722   | 909   | 0.1085269 | 0.0001529 | 0.0012365 |
| Eso-AdenoCa     | 48a0da38-8147-40fe-b683-3f07c  | SBS1  | SBS17 | 3427  | 4156  | 0.0659147 | 1.63E-07  | 2.23E-06  |
| Eso-AdenoCa     | 48a0da38-8147-40fe-b683-3f07c  | SBS5  | SBS17 | 7376  | 4156  | 0.0608491 | 5.65E-09  | 8.90E-08  |
| Eso-AdenoCa     | 384ef419-ee94-4563-9237-236fc  | SBS1  | SBS17 | 4744  | 2891  | 0.0492378 | 0.0003299 | 0.002488  |
| Eso-AdenoCa     | 384ef419-ee94-4563-9237-236fc  | SBS5  | SBS17 | 362   | 2891  | 0.0929729 | 0.0076838 | 0.036815  |
| Eso-AdenoCa     | 384ef419-ee94-4563-9237-236fc  | SBS7  | SBS17 | 1249  | 2891  | 0.0892242 | 1.86E-06  | 2.18E-05  |
| Stomach-AdenoCA | f50fb278-1f0f-406e-b341-eb3d1t | SBS12 | SBS17 | 7192  | 13089 | 0.0315354 | 0.0001957 | 0.0015352 |
| Liver-HCC       | 96abdbc8-c622-11e3-bf01-24c6f  | SBS4  | SBS7  | 11320 | 762   | 0.1208613 | 1.75E-09  | 2.91E-08  |
| Liver-HCC       | 96abdbc8-c622-11e3-bf01-24c6f  | SBS4  | SBS10 | 11320 | 1354  | 0.1184102 | 3.77E-15  | 1.04E-13  |
| Liver-HCC       | 96abdbc8-c622-11e3-bf01-24c6f  | SBS4  | SBS14 | 11320 | 514   | 0.1821854 | 1.33E-14  | 3.45E-13  |
| Liver-HCC       | 96abdbc8-c622-11e3-bf01-24c6f  | SBS10 | SBS14 | 1354  | 514   | 0.1025898 | 0.0007855 | 0.0052651 |
| Panc-AdenoCA    | 241abdfd-e6de-4830-a233-4bbc   | SBS1  | SBS2  | 3378  | 2235  | 0.1581206 | 0         | 0         |
| Panc-AdenoCA    | 241abdfd-e6de-4830-a233-4bbc   | SBS1  | SBS5  | 3378  | 1076  | 0.1900137 | 0         | 0         |
| Panc-AdenoCA    | 241abdfd-e6de-4830-a233-4bbc   | SBS1  | SBS8  | 3378  | 3046  | 0.1024634 | 5.00E-15  | 1.36E-13  |
| Panc-AdenoCA    | 241abdfd-e6de-4830-a233-4bbc   | SBS1  | SBS13 | 3378  | 1254  | 0.10363   | 5.90E-09  | 9.24E-08  |
| Panc-AdenoCA    | 241abdfd-e6de-4830-a233-4bbc   | SBS2  | SBS5  | 2235  | 1076  | 0.0617749 | 0.0078255 | 0.0373232 |
| Panc-AdenoCA    | 241abdfd-e6de-4830-a233-4bbc   | SBS2  | SBS8  | 2235  | 3046  | 0.0609556 | 0.0001382 | 0.0011325 |
| Panc-AdenoCA    | 241abdfd-e6de-4830-a233-4bbc   | SBS2  | SBS13 | 2235  | 1254  | 0.0777517 | 0.0001211 | 0.0010036 |
| Panc-AdenoCA    | 241abdfd-e6de-4830-a233-4bbc   | SBS5  | SBS8  | 1076  | 3046  | 0.1088789 | 1.30E-08  | 1.99E-07  |
| Panc-AdenoCA    | 241abdfd-e6de-4830-a233-4bbc   | SBS5  | SBS13 | 1076  | 1254  | 0.1163592 | 3.10E-07  | 4.04E-06  |
| Eso-AdenoCa     | eb1531b0-8af1-4b2b-9192-644c   | SBS1  | SBS17 | 12643 | 10894 | 0.0460644 | 3.28E-11  | 6.23E-10  |
| Panc-AdenoCA    | bc395326-1656-4ef2-bb19-0cb2f  | SBS1  | SBS6  | 40919 | 7676  | 0.040893  | 8.18E-10  | 1.41E-08  |
| Biliary-AdenoCA | 5c9b8a2c-c623-11e3-bf01-24c6f  | SBS1  | SBS16 | 1304  | 879   | 0.0786606 | 0.0030139 | 0.0168947 |
| Biliary-AdenoCA | 5c9b8a2c-c623-11e3-bf01-24c6f  | SBS8  | SBS16 | 789   | 879   | 0.1211799 | 9.95E-06  | 0.0001017 |
| Ovary-AdenoCA   | e45f3391-2e74-4767-817a-280c   | SBS1  | SBS5  | 547   | 4375  | 0.0919354 | 0.000539  | 0.0038426 |
| Liver-HCC       | b32449c0-c622-11e3-bf01-24c6f  | SBS12 | SBS16 | 759   | 10426 | 0.0678312 | 0.0029755 | 0.0167095 |
| Bone-Osteosarc  | f87348df-7186-4c6b-e040-11ac   | SBS3  | SBS7  | 3093  | 1297  | 0.1047706 | 3.88E-09  | 6.24E-08  |
| Bone-Osteosarc  | f87348df-7186-4c6b-e040-11ac   | SBS3  | SBS17 | 3093  | 464   | 0.1206569 | 1.58E-05  | 0.0001568 |
| Bone-Osteosarc  | f87348df-7186-4c6b-e040-11ac   | SBS6  | SBS7  | 1362  | 1297  | 0.1034365 | 1.34E-06  | 1.60E-05  |
| Bone-Osteosarc  | f87348df-7186-4c6b-e040-11ac   | SBS6  | SBS17 | 1362  | 464   | 0.1184016 | 0.0001221 | 0.0010109 |
| Skin-Melanoma   | 142b6dbf-c943-4a7d-8ab6-13a9   | SBS7  | SBS11 | 56235 | 3982  | 0.0537366 | 9.42E-10  | 1.62E-08  |
| Eso-AdenoCa     | 2b41746a-95c0-4875-afb5-c6d3c  | SBS1  | SBS17 | 14738 | 7213  | 0.0233074 | 0.0103739 | 0.0468397 |
| Prost-AdenoCA   | 1eb37b28-fac2-477a-88b3-e042f  | SBS1  | SBS5  | 319   | 2670  | 0.1212344 | 0.0004605 | 0.0033478 |
| Prost-AdenoCA   | 1eb37b28-fac2-477a-88b3-e042f  | SBS1  | SBS8  | 319   | 1420  | 0.1192724 | 0.0012089 | 0.0077385 |
| Prost-AdenoCA   | 1eb37b28-fac2-477a-88b3-e042f  | SBS1  | SBS9  | 319   | 137   | 0.2122966 | 0.0003541 | 0.0026547 |
| Prost-AdenoCA   | 1eb37b28-fac2-477a-88b3-e042f  | SBS1  | SBS15 | 319   | 354   | 0.1364965 | 0.0038514 | 0.0207537 |
| Prost-AdenoCA   | 1eb37b28-fac2-477a-88b3-e042f  | SBS3  | SBS9  | 248   | 137   | 0.1918413 | 0.0030198 | 0.0169128 |
| Panc-AdenoCA    | cb4608a7-6aec-4cba-b20f-489e   | SBS1  | SBS5  | 932   | 2075  | 0.1438544 | 5.51E-12  | 1.12E-10  |
| Panc-AdenoCA    | cb4608a7-6aec-4cba-b20f-489e   | SBS1  | SBS6  | 932   | 271   | 0.1514063 | 0.000132  | 0.0010885 |
| Panc-AdenoCA    | cb4608a7-6aec-4cba-b20f-489e   | SBS1  | SBS7  | 932   | 607   | 0.1185879 | 6.47E-05  | 0.0005695 |
| Eso-AdenoCa     | 3da169e8-844a-4eee-b794-a2et   | SBS1  | SBS4  | 1186  | 2841  | 0.0565443 | 0.0094929 | 0.043584  |
| Eso-AdenoCa     | 3da169e8-844a-4eee-b794-a2et   | SBS1  | SBS17 | 1186  | 8566  | 0.0973938 | 5.22E-09  | 8.29E-08  |
| Eso-AdenoCa     | 3da169e8-844a-4eee-b794-a2et   | SBS4  | SBS17 | 2841  | 8566  | 0.124855  | 0         | 0         |
| Eso-AdenoCa     | 3da169e8-844a-4eee-b794-a2et   | SBS9  | SBS17 | 2391  | 8566  | 0.095313  | 3.55E-15  | 9.90E-14  |
| Bone-Osteosarc  | f87d7c27-eeef-920e-e040-11ac   | SBS1  | SBS3  | 364   | 2585  | 0.0920484 | 0.0089709 | 0.0417068 |
| Liver-HCC       | b070af2a-c622-11e3-bf01-24c6f  | SBS2  | SBS12 | 983   | 2440  | 0.1186994 | 5.32E-09  | 8.40E-08  |



|                 |                                |       |       |       |       |           |           |           |
|-----------------|--------------------------------|-------|-------|-------|-------|-----------|-----------|-----------|
| Liver-HCC       | b070af2a-c622-11e3-bf01-24c65  | SBS3  | SBS12 | 510   | 2440  | 0.1063243 | 0.0001442 | 0.0011782 |
| Liver-HCC       | b070af2a-c622-11e3-bf01-24c65  | SBS5  | SBS12 | 2832  | 2440  | 0.0775898 | 2.80E-07  | 3.73E-06  |
| Liver-HCC       | 01dc6872-c623-11e3-bf01-24c65  | SBS12 | SBS16 | 2837  | 5770  | 0.0562702 | 1.18E-05  | 0.0001194 |
| Breast-AdenoCa  | fca3f7d0-2231-661c-e040-11ac0  | SBS1  | SBS3  | 1492  | 5371  | 0.0820823 | 2.94E-07  | 3.87E-06  |
| Breast-AdenoCa  | fca3f7d0-2231-661c-e040-11ac0  | SBS1  | SBS11 | 1492  | 1390  | 0.0802949 | 0.0001868 | 0.0014685 |
| Lymph-BNHL      | f9dc999f-6dde-448d-9cf1-2897d  | SBS2  | SBS15 | 14237 | 16946 | 0.0345701 | 1.86E-08  | 2.80E-07  |
| Lymph-BNHL      | f9dc999f-6dde-448d-9cf1-2897d  | SBS3  | SBS15 | 27691 | 16946 | 0.0283423 | 9.25E-08  | 1.29E-06  |
| Lymph-BNHL      | f9dc999f-6dde-448d-9cf1-2897d  | SBS9  | SBS15 | 28300 | 16946 | 0.0342688 | 3.09E-11  | 5.88E-10  |
| Lymph-BNHL      | f9dc999f-6dde-448d-9cf1-2897d  | SBS15 | SBS17 | 16946 | 18163 | 0.0412531 | 2.20E-13  | 5.12E-12  |
| Eso-AdenoCa     | 36680797-36de-413d-b2a1-8804   | SBS1  | SBS17 | 3644  | 3149  | 0.1131445 | 0         | 0         |
| Eso-AdenoCa     | 36680797-36de-413d-b2a1-8804   | SBS5  | SBS17 | 2081  | 3149  | 0.1186696 | 8.88E-16  | 2.59E-14  |
| Eso-AdenoCa     | 36680797-36de-413d-b2a1-8804   | SBS8  | SBS17 | 2404  | 3149  | 0.1339646 | 0         | 0         |
| Eso-AdenoCa     | 36680797-36de-413d-b2a1-8804   | SBS16 | SBS17 | 308   | 3149  | 0.17922   | 2.98E-08  | 4.38E-07  |
| Ovary-AdenoCA   | 123c9d1c-72ba-4d82-8e57-d5ca   | SBS1  | SBS3  | 797   | 5827  | 0.1064872 | 2.49E-07  | 3.34E-06  |
| Ovary-AdenoCA   | 123c9d1c-72ba-4d82-8e57-d5ca   | SBS1  | SBS13 | 797   | 769   | 0.1420052 | 2.79E-07  | 3.72E-06  |
| Ovary-AdenoCA   | f6c811ff-f22e-490b-9b23-b527d2 | SBS1  | SBS3  | 378   | 4656  | 0.1011189 | 0.0015702 | 0.0096857 |
| Ovary-AdenoCA   | f6c811ff-f22e-490b-9b23-b527d2 | SBS1  | SBS13 | 378   | 596   | 0.1191275 | 0.0028177 | 0.0159374 |
| Liver-HCC       | 9ba2c970-c622-11e3-bf01-24c65  | SBS4  | SBS12 | 2491  | 4767  | 0.0443666 | 0.0031901 | 0.0177552 |
| Prost-AdenoCA   | 36962459-e81f-4b8c-a08d-df60e  | SBS3  | SBS9  | 637   | 643   | 0.0949459 | 0.0062439 | 0.0308356 |
| Panc-AdenoCA    | 03c3c692-8a86-4843-85ae-e045   | SBS1  | SBS3  | 2014  | 12422 | 0.1786671 | 0         | 0         |
| Panc-AdenoCA    | 441d2f21-b448-4fc8-8c54-9b85e  | SBS1  | SBS3  | 3299  | 352   | 0.0967339 | 0.0051986 | 0.0265957 |
| Panc-AdenoCA    | 441d2f21-b448-4fc8-8c54-9b85e  | SBS1  | SBS6  | 3299  | 320   | 0.1131138 | 0.0011461 | 0.0073969 |
| Panc-AdenoCA    | 441d2f21-b448-4fc8-8c54-9b85e  | SBS1  | SBS7  | 3299  | 856   | 0.0790334 | 0.0004108 | 0.0030323 |
| Panc-AdenoCA    | 441d2f21-b448-4fc8-8c54-9b85e  | SBS6  | SBS8  | 320   | 603   | 0.1188796 | 0.0054301 | 0.0275997 |
| Liver-HCC       | 5b178f44-c622-11e3-bf01-24c65  | SBS4  | SBS12 | 1907  | 4374  | 0.0693641 | 5.64E-06  | 6.04E-05  |
| Lymph-BNHL      | f9837a56-7244-4846-a63d-266e   | SBS5  | SBS8  | 2112  | 155   | 0.1427878 | 0.0055437 | 0.0279727 |
| Liver-HCC       | 145f6dbb-9744-44f7-8485-e440f  | SBS5  | SBS6  | 2513  | 634   | 0.0812287 | 0.0025093 | 0.0144407 |
| Skin-Melanoma   | 3433b1f3-59d1-4ac2-9bbf-e0c4c  | SBS3  | SBS7  | 1819  | 2485  | 0.0529997 | 0.005478  | 0.0277758 |
| Skin-Melanoma   | 3433b1f3-59d1-4ac2-9bbf-e0c4c  | SBS5  | SBS7  | 6458  | 2485  | 0.0449995 | 0.0013957 | 0.0087792 |
| Skin-Melanoma   | 3433b1f3-59d1-4ac2-9bbf-e0c4c  | SBS7  | SBS13 | 2485  | 931   | 0.0665769 | 0.0049381 | 0.0255202 |
| Stomach-AdenoCA | b49d5310-3cc5-4386-9444-cf0d   | SBS1  | SBS3  | 4682  | 1762  | 0.0836946 | 3.25E-08  | 4.75E-07  |
| Stomach-AdenoCA | b49d5310-3cc5-4386-9444-cf0d   | SBS1  | SBS9  | 4682  | 2254  | 0.054347  | 0.0002498 | 0.0019235 |
| Stomach-AdenoCA | b49d5310-3cc5-4386-9444-cf0d   | SBS3  | SBS15 | 1762  | 699   | 0.0905485 | 0.0005457 | 0.0038817 |
| Stomach-AdenoCA | b49d5310-3cc5-4386-9444-cf0d   | SBS3  | SBS17 | 1762  | 4446  | 0.084204  | 3.38E-08  | 4.93E-07  |
| Stomach-AdenoCA | b49d5310-3cc5-4386-9444-cf0d   | SBS9  | SBS17 | 2254  | 4446  | 0.0562964 | 0.0001526 | 0.0012365 |
| Kidney-RCC      | 45348eff-4b09-4776-825e-b18d   | SBS1  | SBS4  | 379   | 2099  | 0.1438667 | 3.39E-06  | 3.80E-05  |
| Kidney-RCC      | 45348eff-4b09-4776-825e-b18d   | SBS1  | SBS5  | 379   | 539   | 0.1775985 | 1.60E-06  | 1.90E-05  |
| Kidney-RCC      | 45348eff-4b09-4776-825e-b18d   | SBS1  | SBS8  | 379   | 182   | 0.196396  | 0.0001519 | 0.0012335 |
| Eso-AdenoCa     | a37a825c-d74e-46cc-92ef-b650   | SBS1  | SBS2  | 2547  | 2122  | 0.1454436 | 0         | 0         |
| Eso-AdenoCa     | a37a825c-d74e-46cc-92ef-b650   | SBS1  | SBS17 | 2547  | 10103 | 0.1537235 | 0         | 0         |
| Eso-AdenoCa     | a37a825c-d74e-46cc-92ef-b650   | SBS2  | SBS3  | 2122  | 1418  | 0.1171141 | 1.50E-10  | 2.74E-09  |
| Eso-AdenoCa     | a37a825c-d74e-46cc-92ef-b650   | SBS2  | SBS8  | 2122  | 4116  | 0.1317724 | 0         | 0         |
| Eso-AdenoCa     | a37a825c-d74e-46cc-92ef-b650   | SBS2  | SBS9  | 2122  | 317   | 0.2100393 | 5.40E-11  | 1.02E-09  |
| Eso-AdenoCa     | a37a825c-d74e-46cc-92ef-b650   | SBS2  | SBS10 | 2122  | 975   | 0.1233935 | 2.92E-09  | 4.80E-08  |
| Eso-AdenoCa     | a37a825c-d74e-46cc-92ef-b650   | SBS2  | SBS15 | 2122  | 1858  | 0.1552895 | 0         | 0         |
| Eso-AdenoCa     | a37a825c-d74e-46cc-92ef-b650   | SBS2  | SBS17 | 2122  | 10103 | 0.2919096 | 0         | 0         |
| Eso-AdenoCa     | a37a825c-d74e-46cc-92ef-b650   | SBS3  | SBS9  | 1418  | 317   | 0.1116982 | 0.0031145 | 0.0173651 |
| Eso-AdenoCa     | a37a825c-d74e-46cc-92ef-b650   | SBS3  | SBS17 | 1418  | 10103 | 0.1896741 | 0         | 0         |
| Eso-AdenoCa     | a37a825c-d74e-46cc-92ef-b650   | SBS8  | SBS17 | 4116  | 10103 | 0.1636088 | 0         | 0         |
| Eso-AdenoCa     | a37a825c-d74e-46cc-92ef-b650   | SBS9  | SBS10 | 317   | 975   | 0.1050392 | 0.0101972 | 0.0462024 |
| Eso-AdenoCa     | a37a825c-d74e-46cc-92ef-b650   | SBS9  | SBS17 | 317   | 10103 | 0.0967558 | 0.0063355 | 0.0311651 |
| Eso-AdenoCa     | a37a825c-d74e-46cc-92ef-b650   | SBS10 | SBS17 | 975   | 10103 | 0.1851015 | 0         | 0         |
| Eso-AdenoCa     | a37a825c-d74e-46cc-92ef-b650   | SBS15 | SBS17 | 1858  | 10103 | 0.1550152 | 0         | 0         |
| Lymph-CLL       | ebc1a26b-9582-4756-acd5-b02d   | SBS3  | SBS9  | 1031  | 1520  | 0.147944  | 4.19E-12  | 8.64E-11  |
| Lymph-CLL       | ebc1a26b-9582-4756-acd5-b02d   | SBS6  | SBS9  | 576   | 1520  | 0.1156433 | 2.81E-05  | 0.0002682 |
| Breast-AdenoCa  | fc7eb420-5c13-20bd-e040-11ac   | SBS1  | SBS7  | 349   | 463   | 0.1603471 | 7.19E-05  | 0.0006269 |
| Breast-AdenoCa  | fc7eb420-5c13-20bd-e040-11ac   | SBS1  | SBS13 | 349   | 1396  | 0.2979943 | 0         | 0         |
| Breast-AdenoCa  | fc7eb420-5c13-20bd-e040-11ac   | SBS3  | SBS7  | 4323  | 463   | 0.125237  | 4.01E-06  | 4.42E-05  |
| Breast-AdenoCa  | fc7eb420-5c13-20bd-e040-11ac   | SBS3  | SBS13 | 4323  | 1396  | 0.2635107 | 0         | 0         |
| Breast-AdenoCa  | fc7eb420-5c13-20bd-e040-11ac   | SBS7  | SBS13 | 463   | 1396  | 0.1539496 | 1.39E-07  | 1.91E-06  |
| Panc-AdenoCA    | ffe4bb51-e98a-41a7-a4e1-c397   | SBS1  | SBS2  | 1641  | 689   | 0.1981729 | 1.11E-16  | 3.39E-15  |
| Panc-AdenoCA    | ffe4bb51-e98a-41a7-a4e1-c397   | SBS1  | SBS7  | 1641  | 341   | 0.1802867 | 2.14E-08  | 3.18E-07  |
| Panc-AdenoCA    | ffe4bb51-e98a-41a7-a4e1-c397   | SBS2  | SBS8  | 689   | 707   | 0.1841629 | 1.05E-10  | 1.97E-09  |
| Panc-AdenoCA    | ffe4bb51-e98a-41a7-a4e1-c397   | SBS7  | SBS8  | 341   | 707   | 0.1719338 | 2.48E-06  | 2.88E-05  |

|                 |                               |       |       |        |       |           |           |           |
|-----------------|-------------------------------|-------|-------|--------|-------|-----------|-----------|-----------|
| Kidney-RCC      | a335b03d-41ac-4d41-a2a9-3134  | SBS1  | SBS2  | 273    | 475   | 0.1311047 | 0.0051616 | 0.0264279 |
| Kidney-RCC      | a335b03d-41ac-4d41-a2a9-3134  | SBS1  | SBS3  | 273    | 132   | 0.1728272 | 0.0098307 | 0.044644  |
| Kidney-RCC      | a335b03d-41ac-4d41-a2a9-3134  | SBS1  | SBS8  | 273    | 2022  | 0.1099553 | 0.0059591 | 0.0297573 |
| Kidney-RCC      | a335b03d-41ac-4d41-a2a9-3134  | SBS1  | SBS9  | 273    | 779   | 0.1561502 | 0.0001046 | 0.000879  |
| Kidney-RCC      | a335b03d-41ac-4d41-a2a9-3134  | SBS1  | SBS15 | 273    | 541   | 0.1296338 | 0.0044938 | 0.0234885 |
| Kidney-RCC      | a335b03d-41ac-4d41-a2a9-3134  | SBS8  | SBS9  | 2022   | 779   | 0.0711106 | 0.0067776 | 0.0330548 |
| Breast-AdenoCa  | f7f3e156-0dde-72b9-e040-11ac  | SBS1  | SBS2  | 686    | 2762  | 0.1465527 | 1.12E-10  | 2.09E-09  |
| Breast-AdenoCa  | f7f3e156-0dde-72b9-e040-11ac  | SBS1  | SBS13 | 686    | 2898  | 0.1776172 | 1.22E-15  | 3.51E-14  |
| Breast-AdenoCa  | f7f3e156-0dde-72b9-e040-11ac  | SBS2  | SBS3  | 2762   | 2532  | 0.1263866 | 0         | 0         |
| Breast-AdenoCa  | f7f3e156-0dde-72b9-e040-11ac  | SBS2  | SBS13 | 2762   | 2898  | 0.0431127 | 0.0104208 | 0.0469497 |
| Breast-AdenoCa  | f7f3e156-0dde-72b9-e040-11ac  | SBS3  | SBS13 | 2532   | 2898  | 0.1558642 | 0         | 0         |
| Panc-AdenoCA    | e56b0990-ff67-47c1-b9ad-87ef1 | SBS1  | SBS3  | 6550   | 1211  | 0.0514119 | 0.0090072 | 0.0418132 |
| Prost-AdenoCA   | 43b675e0-22e0-42d6-a060-afc9  | SBS1  | SBS8  | 1494   | 1766  | 0.0583618 | 0.0080656 | 0.0382933 |
| Eso-AdenoCa     | 3e6a17f9-c249-41b6-ba49-55aa  | SBS5  | SBS17 | 3945   | 37369 | 0.0288041 | 0.0053646 | 0.0273335 |
| Biliary-AdenoCA | 5a51a6fc-c623-11e3-bf01-24c65 | SBS1  | SBS14 | 6440   | 735   | 0.0705117 | 0.0028318 | 0.0160025 |
| Biliary-AdenoCA | 5a51a6fc-c623-11e3-bf01-24c65 | SBS6  | SBS14 | 975    | 735   | 0.1215071 | 8.45E-06  | 8.84E-05  |
| Lymph-CLL       | 55c82198-5be6-4cc5-b5b3-b707  | SBS5  | SBS9  | 1877   | 780   | 0.2604688 | 0         | 0         |
| Lymph-CLL       | 55c82198-5be6-4cc5-b5b3-b707  | SBS8  | SBS9  | 171    | 780   | 0.231534  | 5.89E-07  | 7.42E-06  |
| Lymph-CLL       | 55c82198-5be6-4cc5-b5b3-b707  | SBS9  | SBS14 | 780    | 136   | 0.2354827 | 5.29E-06  | 5.70E-05  |
| Panc-AdenoCA    | 3c86ba21-7b11-4ec7-9d20-a232  | SBS1  | SBS2  | 4720   | 2955  | 0.1429852 | 0         | 0         |
| Panc-AdenoCA    | 3c86ba21-7b11-4ec7-9d20-a232  | SBS1  | SBS13 | 4720   | 2139  | 0.1196919 | 0         | 0         |
| Lymph-BNHL      | 56e57223-264e-489d-bc9a-a077  | SBS3  | SBS6  | 2734   | 811   | 0.0722617 | 0.002912  | 0.016402  |
| Skin-Melanoma   | a6e24c2a-26b9-409c-bbcd-a8fc  | SBS2  | SBS7  | 264    | 10295 | 0.1370149 | 0.000127  | 0.0010487 |
| Skin-Melanoma   | a6e24c2a-26b9-409c-bbcd-a8fc  | SBS7  | SBS12 | 10295  | 1041  | 0.0653686 | 0.0006196 | 0.004334  |
| Breast-AdenoCa  | fc8130e0-a8b4-d80d-e040-11ac  | SBS7  | SBS13 | 688    | 1381  | 0.0804513 | 0.0052403 | 0.0267651 |
| Breast-AdenoCa  | fc8130e0-a8b4-d80d-e040-11ac  | SBS13 | SBS16 | 1381   | 1996  | 0.0661007 | 0.0015968 | 0.0098207 |
| Prost-AdenoCA   | 0bfd1068-3fd3-a95b-e050-11ac  | SBS1  | SBS3  | 3050   | 2068  | 0.0516793 | 0.0027678 | 0.0156977 |
| Breast-AdenoCa  | fc68c24d-47ad-7961-e040-11ac  | SBS1  | SBS3  | 363    | 5972  | 0.1561022 | 1.14E-07  | 1.59E-06  |
| Breast-AdenoCa  | fc68c24d-47ad-7961-e040-11ac  | SBS1  | SBS9  | 363    | 54    | 0.2757882 | 0.0015687 | 0.0096857 |
| Panc-AdenoCA    | c9e7c629-7b57-4ede-b315-0cea  | SBS3  | SBS15 | 795    | 157   | 0.1449505 | 0.0080976 | 0.038416  |
| Lymph-CLL       | de99a4de-e916-4572-ac9e-73e3  | SBS1  | SBS9  | 162    | 2898  | 0.1432789 | 0.0036755 | 0.0199662 |
| Lymph-CLL       | de99a4de-e916-4572-ac9e-73e3  | SBS7  | SBS9  | 314    | 2898  | 0.2689643 | 0         | 0         |
| Lymph-CLL       | de99a4de-e916-4572-ac9e-73e3  | SBS7  | SBS17 | 314    | 12    | 0.4771762 | 0.0103535 | 0.0467812 |
| Lymph-CLL       | de99a4de-e916-4572-ac9e-73e3  | SBS9  | SBS15 | 2898   | 327   | 0.1857086 | 3.15E-09  | 5.11E-08  |
| Panc-AdenoCA    | 3ed783cf-2248-44a1-a2a2-d6b6  | SBS1  | SBS3  | 688    | 8344  | 0.0671211 | 0.0065137 | 0.0319292 |
| Stomach-AdenoCA | eda1d8d9-e8f5-46f2-bb16-15d0  | SBS1  | SBS7  | 2233   | 1162  | 0.0721165 | 0.0007055 | 0.0048162 |
| Stomach-AdenoCA | eda1d8d9-e8f5-46f2-bb16-15d0  | SBS1  | SBS16 | 2233   | 2386  | 0.0550562 | 0.0018369 | 0.0110689 |
| Breast-AdenoCa  | fc68e599-6a40-61dc-e040-11ac  | SBS1  | SBS3  | 2132   | 4691  | 0.0460166 | 0.0040274 | 0.021444  |
| Breast-AdenoCa  | fc447d4f-2532-c8ea-e040-11ac  | SBS3  | SBS13 | 5723   | 1893  | 0.1053054 | 3.97E-14  | 9.88E-13  |
| Breast-AdenoCa  | fc447d4f-2532-c8ea-e040-11ac  | SBS3  | SBS14 | 5723   | 1068  | 0.0624262 | 0.0017967 | 0.0108686 |
| Breast-AdenoCa  | fc447d4f-2532-c8ea-e040-11ac  | SBS4  | SBS13 | 478    | 1893  | 0.1610613 | 5.04E-09  | 8.01E-08  |
| Breast-AdenoCa  | fc447d4f-2532-c8ea-e040-11ac  | SBS4  | SBS13 | 1030   | 1893  | 0.1129711 | 8.06E-08  | 1.14E-06  |
| Breast-AdenoCa  | fc447d4f-2532-c8ea-e040-11ac  | SBS13 | SBS14 | 1893   | 1068  | 0.1618159 | 5.55E-16  | 1.65E-14  |
| Prost-AdenoCA   | 08e1d976-6c39-428e-a4c2-f655  | SBS1  | SBS5  | 521    | 1872  | 0.1016485 | 0.0004398 | 0.0032199 |
| Breast-AdenoCa  | fc8130e0-0f1a-b6eb-e040-11ac  | SBS1  | SBS2  | 586    | 996   | 0.1664234 | 2.66E-09  | 4.38E-08  |
| Breast-AdenoCa  | fc8130e0-0f1a-b6eb-e040-11ac  | SBS1  | SBS4  | 586    | 1797  | 0.0921302 | 0.0011044 | 0.0071572 |
| Breast-AdenoCa  | fc8130e0-0f1a-b6eb-e040-11ac  | SBS1  | SBS8  | 586    | 3085  | 0.1026264 | 6.25E-05  | 0.0005533 |
| Breast-AdenoCa  | fc8130e0-0f1a-b6eb-e040-11ac  | SBS1  | SBS13 | 586    | 1358  | 0.1562024 | 4.22E-09  | 6.79E-08  |
| Breast-AdenoCa  | fc8130e0-0f1a-b6eb-e040-11ac  | SBS2  | SBS4  | 996    | 1797  | 0.0935562 | 2.69E-05  | 0.0002578 |
| Breast-AdenoCa  | fc8130e0-0f1a-b6eb-e040-11ac  | SBS2  | SBS8  | 996    | 3085  | 0.0730894 | 0.0006419 | 0.0044695 |
| Breast-AdenoCa  | fc8130e0-0f1a-b6eb-e040-11ac  | SBS4  | SBS13 | 1797   | 1358  | 0.0925376 | 3.53E-06  | 3.95E-05  |
| Breast-AdenoCa  | fc8130e0-0f1a-b6eb-e040-11ac  | SBS8  | SBS13 | 3085   | 1358  | 0.0761906 | 3.52E-05  | 0.0003293 |
| Ovary-AdenoCA   | 0ead45d8-d785-4404-8319-2ef9  | SBS3  | SBS6  | 6503   | 1789  | 0.0749273 | 2.88E-07  | 3.81E-06  |
| Ovary-AdenoCA   | 0ead45d8-d785-4404-8319-2ef9  | SBS3  | SBS12 | 6503   | 2113  | 0.0772417 | 1.09E-08  | 1.67E-07  |
| Ovary-AdenoCA   | 0ead45d8-d785-4404-8319-2ef9  | SBS6  | SBS8  | 1789   | 1734  | 0.066956  | 0.0007452 | 0.005054  |
| Ovary-AdenoCA   | 0ead45d8-d785-4404-8319-2ef9  | SBS8  | SBS12 | 1734   | 2113  | 0.0759518 | 3.38E-05  | 0.0003181 |
| Panc-AdenoCA    | 25c32aca-6738-43ef-a103-243f2 | SBS1  | SBS3  | 3753   | 792   | 0.1440545 | 3.26E-12  | 6.83E-11  |
| Panc-AdenoCA    | 25c32aca-6738-43ef-a103-243f2 | SBS1  | SBS9  | 3753   | 204   | 0.118517  | 0.0087188 | 0.0406248 |
| Panc-AdenoCA    | 88d5a8b2-daba-45ce-90bf-480f  | SBS1  | SBS3  | 3249   | 1578  | 0.0579863 | 0.0015813 | 0.0097444 |
| Liver-HCC       | a94d63fa-c622-11e3-bf01-24c65 | SBS3  | SBS12 | 276    | 4896  | 0.1026392 | 0.0081336 | 0.0385332 |
| Liver-HCC       | a94d63fa-c622-11e3-bf01-24c65 | SBS4  | SBS12 | 5446   | 4896  | 0.0863239 | 0         | 0         |
| Skin-Melanoma   | 98e8f23c-5970-4fce-9551-4b11  | SBS7  | SBS11 | 424954 | 36672 | 0.0224233 | 3.66E-15  | 1.02E-13  |
| Breast-AdenoCa  | f393bafd-1baa-e5f4-e040-11ac  | SBS1  | SBS2  | 268    | 549   | 0.1309233 | 0.0041668 | 0.0220368 |
| Breast-AdenoCa  | f393bafd-1baa-e5f4-e040-11ac  | SBS2  | SBS3  | 549    | 4204  | 0.1008546 | 0.0001025 | 0.000865  |

|                |                                |       |       |        |       |           |           |           |
|----------------|--------------------------------|-------|-------|--------|-------|-----------|-----------|-----------|
| Bone-Epith     | fc968a86-32e3-ee88-e040-11ac1  | SBS2  | SBS8  | 854    | 1596  | 0.0753215 | 0.0036275 | 0.0197509 |
| Bone-Epith     | fc968a86-32e3-ee88-e040-11ac1  | SBS2  | SBS16 | 854    | 1156  | 0.0805896 | 0.0033909 | 0.0186392 |
| Skin-Melanoma  | d2620dab-4319-499a-b8f1-9575   | SBS7  | SBS11 | 47018  | 3226  | 0.0396484 | 0.000151  | 0.0012275 |
| Skin-Melanoma  | 1daefc49-5248-4948-87ce-0ec1f  | SBS7  | SBS9  | 97828  | 12364 | 0.0187656 | 0.0008781 | 0.0058052 |
| Breast-AdenoCa | fc8130df-6bec-7627-e040-11ac0  | SBS1  | SBS13 | 387    | 1153  | 0.0958381 | 0.0097599 | 0.0445011 |
| Prost-AdenoCA  | f640d377-98e9-41d3-8761-61eb   | SBS1  | SBS5  | 3870   | 2896  | 0.1137072 | 0         | 0         |
| Prost-AdenoCA  | f640d377-98e9-41d3-8761-61eb   | SBS1  | SBS9  | 3870   | 531   | 0.1499058 | 1.54E-09  | 2.61E-08  |
| Liver-HCC      | d0469256-c622-11e3-bf01-24c6f  | SBS4  | SBS12 | 5714   | 12350 | 0.069306  | 1.11E-16  | 3.39E-15  |
| Ovary-AdenoCA  | ae82fead-2671-4335-a342-67bb   | SBS10 | SBS16 | 767    | 2508  | 0.0825738 | 0.0006643 | 0.0045902 |
| Bone-Osteosarc | f82d213f-9ba5-7b6b-e040-11ac0  | SBS8  | SBS12 | 2851   | 1508  | 0.0708902 | 9.90E-05  | 0.0008387 |
| Panc-AdenoCA   | 2e43e0ca-54ea-482e-acf2-0048f  | SBS1  | SBS8  | 3396   | 3282  | 0.0669736 | 6.29E-07  | 7.83E-06  |
| Panc-Endocrine | dc4ba4bc-6333-4fe9-8805-e058f  | SBS1  | SBS3  | 3212   | 3697  | 0.0737984 | 1.48E-08  | 2.26E-07  |
| Panc-Endocrine | dc4ba4bc-6333-4fe9-8805-e058f  | SBS1  | SBS4  | 3212   | 1518  | 0.0699145 | 8.40E-05  | 0.0007214 |
| Breast-AdenoCa | f393bb05-ec1c-17be-e040-11ac0  | SBS1  | SBS2  | 1082   | 1487  | 0.0652979 | 0.0095845 | 0.043844  |
| Breast-AdenoCa | f393bb05-ec1c-17be-e040-11ac0  | SBS1  | SBS8  | 1082   | 2655  | 0.0621685 | 0.0052531 | 0.0268087 |
| Lymph-BNHL     | 9e842227-2bc6-4185-bedb-abet   | SBS1  | SBS17 | 1373   | 1031  | 0.1468772 | 1.85E-11  | 3.58E-10  |
| Lymph-BNHL     | 9e842227-2bc6-4185-bedb-abet   | SBS5  | SBS17 | 2495   | 1031  | 0.1468504 | 4.33E-14  | 1.07E-12  |
| Lymph-BNHL     | 9e842227-2bc6-4185-bedb-abet   | SBS9  | SBS17 | 1523   | 1031  | 0.1515457 | 1.09E-12  | 2.37E-11  |
| Lymph-BNHL     | 9e842227-2bc6-4185-bedb-abet   | SBS15 | SBS17 | 368    | 1031  | 0.1280416 | 0.0002748 | 0.002098  |
| Lymph-BNHL     | d733cf1a-4c42-4def-b6cb-5ef2cf | SBS1  | SBS9  | 2752   | 10904 | 0.044582  | 0.0003217 | 0.0024293 |
| Lymph-BNHL     | d733cf1a-4c42-4def-b6cb-5ef2cf | SBS1  | SBS11 | 2752   | 2265  | 0.0571301 | 0.0006009 | 0.0042218 |
| Lymph-BNHL     | d733cf1a-4c42-4def-b6cb-5ef2cf | SBS1  | SBS17 | 2752   | 8271  | 0.0605361 | 5.35E-07  | 6.80E-06  |
| Breast-AdenoCa | fc8130df-2e39-3814-e040-11ac0  | SBS1  | SBS2  | 920    | 383   | 0.1435861 | 2.87E-05  | 0.0002728 |
| Breast-AdenoCa | fc8130df-2e39-3814-e040-11ac0  | SBS2  | SBS5  | 383    | 1323  | 0.1539463 | 1.54E-06  | 1.83E-05  |
| Breast-AdenoCa | f7d7b3db-02af-61cb-e040-11ac0  | SBS2  | SBS3  | 1974   | 879   | 0.2330398 | 0         | 0         |
| Breast-AdenoCa | f7d7b3db-02af-61cb-e040-11ac0  | SBS2  | SBS13 | 1974   | 324   | 0.1112237 | 0.002044  | 0.0121534 |
| Breast-AdenoCa | f7d7b3db-02af-61cb-e040-11ac0  | SBS3  | SBS13 | 879    | 324   | 0.3364935 | 0         | 0         |
| Panc-AdenoCA   | aa4a868a-df23-4eef-a618-e945e  | SBS1  | SBS12 | 7909   | 2959  | 0.0552996 | 3.81E-06  | 4.24E-05  |
| Panc-AdenoCA   | aa4a868a-df23-4eef-a618-e945e  | SBS1  | SBS17 | 7909   | 1341  | 0.0541164 | 0.0024233 | 0.0140748 |
| Eso-AdenoCa    | 9de495d1-55b2-4535-9b0a-a99e   | SBS1  | SBS17 | 8331   | 5012  | 0.1134756 | 0         | 0         |
| Eso-AdenoCa    | 9de495d1-55b2-4535-9b0a-a99e   | SBS6  | SBS17 | 192    | 5012  | 0.1456504 | 0.0007829 | 0.0052532 |
| Eso-AdenoCa    | 9de495d1-55b2-4535-9b0a-a99e   | SBS8  | SBS17 | 879    | 5012  | 0.115111  | 4.94E-09  | 7.88E-08  |
| Eso-AdenoCa    | 9de495d1-55b2-4535-9b0a-a99e   | SBS13 | SBS17 | 967    | 5012  | 0.1266392 | 1.02E-11  | 2.02E-10  |
| Eso-AdenoCa    | 9de495d1-55b2-4535-9b0a-a99e   | SBS15 | SBS17 | 598    | 5012  | 0.1257978 | 9.07E-08  | 1.27E-06  |
| Liver-HCC      | b5f90cb8-7304-48fb-a1d3-ff459c | SBS4  | SBS6  | 1596   | 12450 | 0.0451318 | 0.0062836 | 0.0310008 |
| Skin-Melanoma  | 08b5d0e4-4661-460e-a9f7-f2e6f  | SBS7  | SBS11 | 71044  | 1198  | 0.0590813 | 0.0005359 | 0.0038249 |
| Myeloid-MPN    | f8e61a02-8c9e-aaee-e040-11ac1  | SBS5  | SBS6  | 466    | 542   | 0.1293651 | 0.0004558 | 0.0033213 |
| Skin-Melanoma  | b3befa40-8f44-4eb6-ada0-ec39e  | SBS3  | SBS7  | 4397   | 1353  | 0.0552505 | 0.0036119 | 0.0197002 |
| Eso-AdenoCa    | dfde4013-9062-42f5-a42b-626ef  | SBS1  | SBS2  | 20624  | 6066  | 0.2069893 | 0         | 0         |
| Eso-AdenoCa    | dfde4013-9062-42f5-a42b-626ef  | SBS1  | SBS7  | 20624  | 851   | 0.0750418 | 0.0002011 | 0.0015758 |
| Eso-AdenoCa    | dfde4013-9062-42f5-a42b-626ef  | SBS1  | SBS8  | 20624  | 4402  | 0.0306275 | 0.0022145 | 0.0129948 |
| Eso-AdenoCa    | dfde4013-9062-42f5-a42b-626ef  | SBS2  | SBS6  | 6066   | 448   | 0.2284145 | 0         | 0         |
| Eso-AdenoCa    | dfde4013-9062-42f5-a42b-626ef  | SBS2  | SBS7  | 6066   | 851   | 0.1465046 | 2.44E-14  | 6.15E-13  |
| Eso-AdenoCa    | dfde4013-9062-42f5-a42b-626ef  | SBS2  | SBS8  | 6066   | 4402  | 0.1866498 | 0         | 0         |
| Eso-AdenoCa    | dfde4013-9062-42f5-a42b-626ef  | SBS6  | SBS7  | 448    | 851   | 0.0963992 | 0.0085519 | 0.0400257 |
| Liver-HCC      | 3faeb03e-c622-11e3-bf01-24c6f  | SBS4  | SBS14 | 6690   | 637   | 0.0955697 | 4.86E-05  | 0.0004416 |
| Liver-HCC      | 3faeb03e-c622-11e3-bf01-24c6f  | SBS4  | SBS16 | 6690   | 13040 | 0.087588  | 0         | 0         |
| Skin-Melanoma  | c95a2b1b-726c-4608-9fff-d57b6f | SBS7  | SBS11 | 108992 | 2508  | 0.0671898 | 4.87E-10  | 8.60E-09  |
| Kidney-RCC     | 155873b2-e5de-405f-87f6-6de0c  | SBS3  | SBS16 | 1791   | 811   | 0.0793493 | 0.0017707 | 0.0107321 |
| Lymph-BNHL     | 3e012b50-06d1-4120-971b-5e54   | SBS1  | SBS5  | 2347   | 19928 | 0.0437112 | 0.0006552 | 0.0045373 |
| Lymph-BNHL     | 3e012b50-06d1-4120-971b-5e54   | SBS1  | SBS9  | 2347   | 2539  | 0.0677482 | 2.75E-05  | 0.0002632 |
| Head-SCC       | 9650640f-154d-4696-aa96-3611   | SBS1  | SBS3  | 1142   | 2016  | 0.0856432 | 4.53E-05  | 0.000413  |
| Head-SCC       | 9650640f-154d-4696-aa96-3611   | SBS1  | SBS9  | 1142   | 1572  | 0.106975  | 5.32E-07  | 6.78E-06  |
| Head-SCC       | 9650640f-154d-4696-aa96-3611   | SBS5  | SBS9  | 1162   | 1572  | 0.0622928 | 0.0111976 | 0.0497345 |
| Panc-AdenoCA   | 53e6a756-bdcd-4217-afe7-27d7   | SBS1  | SBS4  | 2664   | 462   | 0.0842596 | 0.0074658 | 0.0358806 |
| Liver-HCC      | 5dce221a-c623-11e3-bf01-24c6f  | SBS4  | SBS16 | 1537   | 1975  | 0.0618835 | 0.0026665 | 0.0152058 |
| Prost-AdenoCA  | 1a319682-f55e-4e0b-8476-48a0   | SBS1  | SBS3  | 1073   | 887   | 0.2219362 | 0         | 0         |
| Prost-AdenoCA  | 1a319682-f55e-4e0b-8476-48a0   | SBS1  | SBS16 | 1073   | 648   | 0.1878747 | 8.22E-13  | 1.82E-11  |
| Liver-HCC      | 59632e7e-c622-11e3-bf01-24c6f  | SBS3  | SBS12 | 1953   | 12054 | 0.03977   | 0.0098195 | 0.0446256 |
| Lymph-CLL      | 132f7f2a-b902-4343-aa08-cf6a7  | SBS1  | SBS9  | 754    | 390   | 0.2267905 | 6.57E-12  | 1.32E-10  |
| Lymph-CLL      | 132f7f2a-b902-4343-aa08-cf6a7  | SBS1  | SBS12 | 754    | 765   | 0.0847055 | 0.0085999 | 0.0401608 |
| Lymph-CLL      | 132f7f2a-b902-4343-aa08-cf6a7  | SBS8  | SBS9  | 1148   | 390   | 0.2261056 | 2.37E-13  | 5.50E-12  |
| Lymph-CLL      | 132f7f2a-b902-4343-aa08-cf6a7  | SBS8  | SBS12 | 1148   | 765   | 0.0856494 | 0.0023761 | 0.0138262 |
| Lymph-CLL      | 132f7f2a-b902-4343-aa08-cf6a7  | SBS9  | SBS12 | 390    | 765   | 0.1575163 | 5.42E-06  | 5.84E-05  |

|                |                                |       |       |        |        |           |           |           |
|----------------|--------------------------------|-------|-------|--------|--------|-----------|-----------|-----------|
| Eso-AdenoCa    | 569393c8-e2fe-4580-a45b-811f1t | SBS8  | SBS9  | 2817   | 5296   | 0.0386058 | 0.0083274 | 0.0392457 |
| Eso-AdenoCa    | 569393c8-e2fe-4580-a45b-811f1t | SBS8  | SBS17 | 2817   | 32510  | 0.0844029 | 2.22E-16  | 6.72E-15  |
| Eso-AdenoCa    | 569393c8-e2fe-4580-a45b-811f1t | SBS9  | SBS17 | 5296   | 32510  | 0.0526753 | 2.12E-11  | 4.08E-10  |
| Lymph-BNHL     | 068f4f69-d2fe-4f25-912e-ca7d4f | SBS1  | SBS3  | 1596   | 4735   | 0.0468027 | 0.0107134 | 0.0479918 |
| Prost-AdenoCA  | b3f1d232-4392-4258-9256-d38ff  | SBS1  | SBS3  | 565    | 3338   | 0.1994051 | 0         | 0         |
| Prost-AdenoCA  | b3f1d232-4392-4258-9256-d38ff  | SBS3  | SBS6  | 3338   | 119    | 0.1684952 | 0.0029345 | 0.0164963 |
| Skin-Melanoma  | 5c3def3a-b515-41f6-8157-681b   | SBS7  | SBS11 | 493078 | 20683  | 0.017207  | 1.57E-05  | 0.000156  |
| Skin-Melanoma  | 9fc5b5c7-3973-42b4-8710-454d   | SBS1  | SBS6  | 6550   | 11923  | 0.1194864 | 0         | 0         |
| Skin-Melanoma  | 9fc5b5c7-3973-42b4-8710-454d   | SBS1  | SBS7  | 6550   | 167076 | 0.2394576 | 0         | 0         |
| Skin-Melanoma  | 9fc5b5c7-3973-42b4-8710-454d   | SBS1  | SBS11 | 6550   | 8078   | 0.064897  | 1.17E-13  | 2.81E-12  |
| Skin-Melanoma  | 9fc5b5c7-3973-42b4-8710-454d   | SBS6  | SBS7  | 11923  | 167076 | 0.3566712 | 0         | 0         |
| Skin-Melanoma  | 9fc5b5c7-3973-42b4-8710-454d   | SBS6  | SBS11 | 11923  | 8078   | 0.1811812 | 0         | 0         |
| Skin-Melanoma  | 9fc5b5c7-3973-42b4-8710-454d   | SBS7  | SBS11 | 167076 | 8078   | 0.1771562 | 0         | 0         |
| Kidney-RCC     | cbb788dd-964b-4cfd-80e1-979c   | SBS1  | SBS3  | 460    | 6173   | 0.1091292 | 7.46E-05  | 0.0006466 |
| Panc-AdenoCA   | 5d9ff58c-5702-48fc-a66a-d1276  | SBS3  | SBS4  | 7500   | 3961   | 0.0900454 | 0         | 0         |
| Panc-AdenoCA   | 5d9ff58c-5702-48fc-a66a-d1276  | SBS3  | SBS5  | 7500   | 1610   | 0.0749822 | 6.73E-07  | 8.32E-06  |
| Panc-AdenoCA   | 5d9ff58c-5702-48fc-a66a-d1276  | SBS3  | SBS15 | 7500   | 1927   | 0.1490094 | 0         | 0         |
| Panc-AdenoCA   | 5d9ff58c-5702-48fc-a66a-d1276  | SBS4  | SBS15 | 3961   | 1927   | 0.0743105 | 1.21E-06  | 1.46E-05  |
| Panc-AdenoCA   | 5d9ff58c-5702-48fc-a66a-d1276  | SBS5  | SBS15 | 1610   | 1927   | 0.084981  | 6.29E-06  | 6.69E-05  |
| Breast-AdenoCa | fc5dc6d8-62d2-76d8-e040-11ac   | SBS1  | SBS3  | 4898   | 1416   | 0.0517832 | 0.0055287 | 0.0279647 |
| Breast-AdenoCa | f7b84bac-f161-9eee-e040-11ac   | SBS2  | SBS3  | 1105   | 913    | 0.125553  | 2.86E-07  | 3.79E-06  |
| Breast-AdenoCa | f7b84bac-f161-9eee-e040-11ac   | SBS2  | SBS12 | 1105   | 605    | 0.1023298 | 0.0005562 | 0.0039385 |
| Breast-AdenoCa | f7b84bac-f161-9eee-e040-11ac   | SBS2  | SBS15 | 1105   | 373    | 0.1578664 | 1.84E-06  | 2.16E-05  |
| Breast-AdenoCa | f7b84bac-f161-9eee-e040-11ac   | SBS3  | SBS13 | 913    | 1013   | 0.1830043 | 2.15E-14  | 5.44E-13  |
| Breast-AdenoCa | f7b84bac-f161-9eee-e040-11ac   | SBS12 | SBS13 | 605    | 1013   | 0.1589224 | 9.81E-09  | 1.51E-07  |
| Breast-AdenoCa | f7b84bac-f161-9eee-e040-11ac   | SBS13 | SBS15 | 1013   | 373    | 0.2169332 | 1.44E-11  | 2.81E-10  |
| Eso-AdenoCa    | 9258860c-a336-4075-996d-2ee    | SBS6  | SBS17 | 2266   | 18808  | 0.059446  | 1.24E-06  | 1.49E-05  |
| Prost-AdenoCA  | 0bfeb9f-c783-e57d-e050-11ac    | SBS1  | SBS9  | 771    | 1741   | 0.1247446 | 1.20E-07  | 1.65E-06  |
| Prost-AdenoCA  | 0bfeb9f-c783-e57d-e050-11ac    | SBS4  | SBS9  | 961    | 1741   | 0.0769553 | 0.0013058 | 0.0082748 |
| Prost-AdenoCA  | 0bfeb9f-c783-e57d-e050-11ac    | SBS9  | SBS15 | 1741   | 438    | 0.0889559 | 0.0078646 | 0.0374809 |
| Kidney-RCC     | 005794f1-5a87-45b5-9811-83dd   | SBS4  | SBS16 | 1473   | 92     | 0.1776174 | 0.0084767 | 0.0397929 |
| Head-SCC       | 0f9e70b3-24cf-4d76-af7b-84ac   | SBS1  | SBS4  | 2685   | 610    | 0.0865555 | 0.0011652 | 0.0075129 |
| Skin-Melanoma  | 1ac15380-04a2-42dd-8ade-285    | SBS2  | SBS3  | 722    | 3238   | 0.0880404 | 0.000212  | 0.0016507 |
| Skin-Melanoma  | 1ac15380-04a2-42dd-8ade-285    | SBS3  | SBS11 | 3238   | 331    | 0.0931415 | 0.0109185 | 0.0486673 |
| Skin-Melanoma  | 1ac15380-04a2-42dd-8ade-285    | SBS3  | SBS13 | 3238   | 659    | 0.1200853 | 2.77E-07  | 3.70E-06  |
| Skin-Melanoma  | 1ac15380-04a2-42dd-8ade-285    | SBS4  | SBS13 | 861    | 659    | 0.1093199 | 0.0002668 | 0.0020414 |
| Prost-AdenoCA  | 5d6ad982-bb01-4233-b8fa-d129   | SBS1  | SBS8  | 1604   | 1480   | 0.072021  | 0.0006808 | 0.0046677 |
| Skin-Melanoma  | e2b2357c-da6f-4ca3-9c07-a22f   | SBS7  | SBS11 | 143113 | 6236   | 0.0230654 | 0.0034649 | 0.0189813 |
| Prost-AdenoCA  | 120f01d1-8884-4aca-a1cb-36b2   | SBS2  | SBS5  | 475    | 415    | 0.1090679 | 0.0102916 | 0.0465351 |
| Prost-AdenoCA  | 120f01d1-8884-4aca-a1cb-36b2   | SBS2  | SBS16 | 475    | 1436   | 0.102957  | 0.0010344 | 0.0067772 |
| Prost-AdenoCA  | f5378545-17d4-4a64-a57e-f6c91  | SBS1  | SBS5  | 2437   | 4263   | 0.2351864 | 0         | 0         |
| Prost-AdenoCA  | f5378545-17d4-4a64-a57e-f6c91  | SBS1  | SBS9  | 2437   | 739    | 0.205087  | 0         | 0         |
| Prost-AdenoCA  | f5378545-17d4-4a64-a57e-f6c91  | SBS5  | SBS6  | 4263   | 102    | 0.184529  | 0.0022633 | 0.0132315 |
| Prost-AdenoCA  | f5378545-17d4-4a64-a57e-f6c91  | SBS6  | SBS9  | 102    | 739    | 0.1926424 | 0.0025817 | 0.0147892 |
| Panc-AdenoCA   | 54195db3-94a9-4538-8bb8-995    | SBS3  | SBS6  | 5364   | 871    | 0.0725261 | 0.0007542 | 0.0050935 |
| Panc-AdenoCA   | 54195db3-94a9-4538-8bb8-995    | SBS3  | SBS13 | 5364   | 714    | 0.0837109 | 0.0002922 | 0.0022226 |
| Panc-AdenoCA   | 54195db3-94a9-4538-8bb8-995    | SBS6  | SBS8  | 871    | 3871   | 0.0607224 | 0.0105653 | 0.0474983 |
| Panc-AdenoCA   | 54195db3-94a9-4538-8bb8-995    | SBS8  | SBS13 | 3871   | 714    | 0.068207  | 0.0073309 | 0.0353406 |
| Breast-AdenoCa | f393bb07-270c-2c93-e040-11ac   | SBS3  | SBS13 | 7931   | 1138   | 0.1833886 | 0         | 0         |
| Ovary-AdenoCA  | 4e913899-eeb8-4630-ba9d-41a    | SBS1  | SBS13 | 860    | 1587   | 0.2496073 | 0         | 0         |
| Ovary-AdenoCA  | 4e913899-eeb8-4630-ba9d-41a    | SBS3  | SBS13 | 2918   | 1587   | 0.2125464 | 0         | 0         |
| Ovary-AdenoCA  | cd9efdef-a7fb-49e5-9515-63606  | SBS1  | SBS5  | 565    | 1271   | 0.1163128 | 5.07E-05  | 0.0004577 |
| Ovary-AdenoCA  | cd9efdef-a7fb-49e5-9515-63606  | SBS1  | SBS8  | 565    | 2220   | 0.1070717 | 6.55E-05  | 0.0005758 |
| Eso-AdenoCa    | 532bec86-b8d3-41a1-ba17-913    | SBS6  | SBS8  | 5562   | 7897   | 0.0686131 | 9.05E-14  | 2.19E-12  |
| Eso-AdenoCa    | 532bec86-b8d3-41a1-ba17-913    | SBS6  | SBS17 | 5562   | 15340  | 0.0259614 | 0.0081536 | 0.0385939 |
| Eso-AdenoCa    | 532bec86-b8d3-41a1-ba17-913    | SBS8  | SBS17 | 7897   | 15340  | 0.0692725 | 0         | 0         |
| Panc-AdenoCA   | 40378b7a-a65d-4510-aaba-a34c   | SBS1  | SBS2  | 5450   | 909    | 0.0631059 | 0.0040386 | 0.0214715 |
| Eso-AdenoCa    | 1f967003-82d6-4932-a445-24fc   | SBS1  | SBS17 | 7536   | 2952   | 0.0691844 | 3.04E-09  | 4.96E-08  |
| Panc-AdenoCA   | b47aa163-ee9c-9225-940b-437    | SBS1  | SBS8  | 2581   | 1626   | 0.0919161 | 9.56E-08  | 1.33E-06  |
| Eso-AdenoCa    | f37de4fa-52f6-4fe4-a3fa-418030 | SBS1  | SBS9  | 3658   | 2619   | 0.0469796 | 0.002372  | 0.0138156 |
| Eso-AdenoCa    | f37de4fa-52f6-4fe4-a3fa-418030 | SBS1  | SBS17 | 3658   | 20237  | 0.0572155 | 3.10E-09  | 5.04E-08  |
| Eso-AdenoCa    | f37de4fa-52f6-4fe4-a3fa-418030 | SBS8  | SBS17 | 8442   | 20237  | 0.0686057 | 0         | 0         |
| Eso-AdenoCa    | f37de4fa-52f6-4fe4-a3fa-418030 | SBS9  | SBS17 | 2619   | 20237  | 0.067196  | 1.61E-09  | 2.72E-08  |
| Eso-AdenoCa    | f37de4fa-52f6-4fe4-a3fa-418030 | SBS15 | SBS17 | 454    | 20237  | 0.1104836 | 3.92E-05  | 0.0003643 |

|                |                                |       |       |       |       |           |           |           |
|----------------|--------------------------------|-------|-------|-------|-------|-----------|-----------|-----------|
| Lymph-CLL      | 99e7016a-c3c1-431c-8838-beb7   | SBS1  | SBS5  | 434   | 997   | 0.1219488 | 0.0002484 | 0.001915  |
| Lymph-CLL      | 99e7016a-c3c1-431c-8838-beb7   | SBS1  | SBS8  | 434   | 1570  | 0.1098565 | 0.0005456 | 0.0038817 |
| Eso-AdenoCa    | f2e639cc-c30c-459f-8afc-7ace7c | SBS1  | SBS7  | 4700  | 1115  | 0.0688427 | 0.0003901 | 0.0029061 |
| Eso-AdenoCa    | f2e639cc-c30c-459f-8afc-7ace7c | SBS1  | SBS17 | 4700  | 1938  | 0.0846402 | 5.79E-09  | 9.09E-08  |
| Eso-AdenoCa    | f2e639cc-c30c-459f-8afc-7ace7c | SBS5  | SBS17 | 767   | 1938  | 0.1182391 | 4.25E-07  | 5.49E-06  |
| Eso-AdenoCa    | f2e639cc-c30c-459f-8afc-7ace7c | SBS7  | SBS17 | 1115  | 1938  | 0.1503061 | 2.59E-14  | 6.48E-13  |
| Eso-AdenoCa    | f2e639cc-c30c-459f-8afc-7ace7c | SBS8  | SBS17 | 1019  | 1938  | 0.1109746 | 1.44E-07  | 1.96E-06  |
| Eso-AdenoCa    | f2e639cc-c30c-459f-8afc-7ace7c | SBS15 | SBS17 | 358   | 1938  | 0.1332336 | 4.38E-05  | 0.0004005 |
| Eso-AdenoCa    | 4283773c-c04b-4f33-a398-f356e  | SBS9  | SBS17 | 2666  | 34917 | 0.0667365 | 5.24E-10  | 9.15E-09  |
| Eso-AdenoCa    | 4283773c-c04b-4f33-a398-f356e  | SBS15 | SBS17 | 2276  | 34917 | 0.0486473 | 8.11E-05  | 0.0006979 |
| Prost-AdenoCA  | ab8a55ed-ff47-4cad-ad91-52b9c  | SBS1  | SBS3  | 2196  | 1446  | 0.1068332 | 4.55E-09  | 7.29E-08  |
| Prost-AdenoCA  | ab8a55ed-ff47-4cad-ad91-52b9c  | SBS1  | SBS9  | 2196  | 316   | 0.1155784 | 0.0012466 | 0.0079721 |
| Panc-AdenoCA   | 2b6d4d66-7f0b-4bc0-b3d6-1719   | SBS1  | SBS4  | 2048  | 649   | 0.0920775 | 0.0004697 | 0.0033989 |
| Panc-AdenoCA   | 2b6d4d66-7f0b-4bc0-b3d6-1719   | SBS1  | SBS7  | 2048  | 260   | 0.1714017 | 2.59E-06  | 2.99E-05  |
| Panc-AdenoCA   | 2b6d4d66-7f0b-4bc0-b3d6-1719   | SBS1  | SBS13 | 2048  | 376   | 0.1432326 | 4.37E-06  | 4.78E-05  |
| Panc-AdenoCA   | 2b6d4d66-7f0b-4bc0-b3d6-1719   | SBS1  | SBS17 | 2048  | 863   | 0.0949048 | 3.56E-05  | 0.0003322 |
| Kidney-RCC     | e053d377-e4f2-4aee-af7d-e616c  | SBS1  | SBS5  | 431   | 5094  | 0.1018427 | 0.0005261 | 0.0037681 |
| Kidney-RCC     | 3afb3f57-545a-4ed5-9461-2fcb2  | SBS5  | SBS8  | 50    | 4824  | 0.2323549 | 0.0095583 | 0.0438198 |
| Liver-HCC      | ed52e836-c622-11e3-bf01-24c6   | SBS15 | SBS16 | 130   | 4008  | 0.1492208 | 0.0073405 | 0.0353595 |
| Breast-AdenoCa | fc8130df-90ba-5d94-e040-11ac   | SBS1  | SBS3  | 373   | 3912  | 0.137714  | 4.91E-06  | 5.33E-05  |
| Breast-AdenoCa | fc8130df-90ba-5d94-e040-11ac   | SBS1  | SBS7  | 373   | 985   | 0.1158776 | 0.0013983 | 0.0087792 |
| Breast-AdenoCa | fc8130df-90ba-5d94-e040-11ac   | SBS1  | SBS8  | 373   | 1106  | 0.1446824 | 1.70E-05  | 0.0001669 |
| Breast-AdenoCa | fc8130df-90ba-5d94-e040-11ac   | SBS1  | SBS13 | 373   | 1403  | 0.147797  | 5.13E-06  | 5.55E-05  |
| Breast-AdenoCa | fc8130df-90ba-5d94-e040-11ac   | SBS1  | SBS16 | 373   | 1525  | 0.1764884 | 1.56E-08  | 2.37E-07  |
| Breast-AdenoCa | fc8130df-90ba-5d94-e040-11ac   | SBS7  | SBS16 | 985   | 1525  | 0.072251  | 0.0038681 | 0.020792  |
| Liver-HCC      | 8cf713ff-256b-4411-a1b4-5bf6f4 | SBS5  | SBS12 | 5349  | 1947  | 0.0592314 | 8.94E-05  | 0.0007631 |
| Panc-Endocrine | d404ac28-da11-4746-9c3b-cf0b   | SBS1  | SBS2  | 720   | 1066  | 0.0875912 | 0.0027367 | 0.0155351 |
| Prost-AdenoCA  | 5c8da06c-7964-4ad1-ac9e-d1b5   | SBS1  | SBS12 | 2514  | 2711  | 0.1607177 | 0         | 0         |
| Breast-AdenoCa | fc8130e0-a538-dda3-e040-11ac   | SBS1  | SBS2  | 1813  | 1696  | 0.1601556 | 0         | 0         |
| Breast-AdenoCa | fc8130e0-a538-dda3-e040-11ac   | SBS2  | SBS3  | 1696  | 1204  | 0.1573528 | 1.44E-15  | 4.13E-14  |
| Breast-AdenoCa | fc8130e0-a538-dda3-e040-11ac   | SBS2  | SBS16 | 1696  | 412   | 0.1834929 | 4.05E-10  | 7.24E-09  |
| Panc-AdenoCA   | 1168944c-5451-4a18-8758-88bf   | SBS1  | SBS3  | 563   | 9283  | 0.094041  | 0.0001673 | 0.001336  |
| Panc-AdenoCA   | 1168944c-5451-4a18-8758-88bf   | SBS3  | SBS6  | 9283  | 470   | 0.0820589 | 0.0048369 | 0.0250521 |
| Prost-AdenoCA  | 0bfe2ac9-0afa-c248-e050-11ac   | SBS4  | SBS9  | 1586  | 541   | 0.0801258 | 0.011259  | 0.0499718 |
| Panc-AdenoCA   | c741fb12-8160-43a7-bc70-2c54   | SBS1  | SBS5  | 3783  | 2849  | 0.1255489 | 0         | 0         |
| Panc-AdenoCA   | c741fb12-8160-43a7-bc70-2c54   | SBS1  | SBS15 | 3783  | 359   | 0.0926488 | 0.0071845 | 0.0347415 |
| Panc-AdenoCA   | c741fb12-8160-43a7-bc70-2c54   | SBS4  | SBS5  | 316   | 2849  | 0.0960819 | 0.0104748 | 0.0471591 |
| Liver-HCC      | 1295947c-c623-11e3-bf01-24c6   | SBS4  | SBS16 | 962   | 30532 | 0.0527821 | 0.0110725 | 0.0492487 |
| Panc-AdenoCA   | f7702c0c-9636-4700-a8ae-7a58   | SBS1  | SBS2  | 5398  | 641   | 0.1135328 | 7.70E-07  | 9.44E-06  |
| Liver-HCC      | cdcc04fc-c622-11e3-bf01-24c6   | SBS12 | SBS16 | 6944  | 8274  | 0.042368  | 2.60E-06  | 2.99E-05  |
| Eso-AdenoCa    | f0a33adc-ea90-46ef-a24a-a8d7e  | SBS6  | SBS8  | 4132  | 4864  | 0.0345084 | 0.0097767 | 0.0445283 |
| Eso-AdenoCa    | f0a33adc-ea90-46ef-a24a-a8d7e  | SBS6  | SBS17 | 4132  | 26719 | 0.027797  | 0.0079307 | 0.0377099 |
| Eso-AdenoCa    | f0a33adc-ea90-46ef-a24a-a8d7e  | SBS8  | SBS17 | 4864  | 26719 | 0.0593528 | 5.13E-13  | 1.15E-11  |
| Head-SCC       | f35f7712-d5c6-47f6-98ed-704ed  | SBS1  | SBS2  | 1519  | 7313  | 0.0938969 | 4.67E-10  | 8.33E-09  |
| Head-SCC       | f35f7712-d5c6-47f6-98ed-704ed  | SBS1  | SBS13 | 1519  | 9150  | 0.0594047 | 0.0002032 | 0.0015898 |
| Head-SCC       | f35f7712-d5c6-47f6-98ed-704ed  | SBS2  | SBS5  | 7313  | 3753  | 0.1068276 | 0         | 0         |
| Head-SCC       | f35f7712-d5c6-47f6-98ed-704ed  | SBS2  | SBS7  | 7313  | 1991  | 0.0694815 | 5.48E-07  | 6.95E-06  |
| Head-SCC       | f35f7712-d5c6-47f6-98ed-704ed  | SBS2  | SBS13 | 7313  | 9150  | 0.0389702 | 8.70E-06  | 9.07E-05  |
| Head-SCC       | f35f7712-d5c6-47f6-98ed-704ed  | SBS5  | SBS13 | 3753  | 9150  | 0.0688389 | 2.22E-11  | 4.24E-10  |
| Liver-HCC      | 4ed52e0c-c623-11e3-bf01-24c6   | SBS8  | SBS12 | 581   | 2352  | 0.1091304 | 3.03E-05  | 0.0002869 |
| Liver-HCC      | 4ed52e0c-c623-11e3-bf01-24c6   | SBS12 | SBS16 | 2352  | 4217  | 0.0546164 | 0.0002449 | 0.0018902 |
| Ovary-AdenoCA  | f858d813-f3c5-4ad9-8c20-9f231  | SBS1  | SBS13 | 950   | 2104  | 0.0813908 | 0.0003429 | 0.0025797 |
| Skin-Melanoma  | 12f1ae2f-2666-45be-9742-f502d  | SBS7  | SBS11 | 86779 | 4391  | 0.0574159 | 2.16E-12  | 4.61E-11  |
| Ovary-AdenoCA  | efbec43c-0c16-4006-abe8-c3ec   | SBS3  | SBS6  | 4991  | 558   | 0.0827378 | 0.0020741 | 0.0122971 |
| Breast-AdenoCa | f393bb0b-08ed-3335-e040-11ac   | SBS1  | SBS3  | 914   | 6599  | 0.1447832 | 4.88E-15  | 1.33E-13  |
| Breast-AdenoCa | f393bb0b-08ed-3335-e040-11ac   | SBS1  | SBS10 | 914   | 1300  | 0.1212052 | 2.84E-07  | 3.77E-06  |
| Breast-AdenoCa | f393bb0b-08ed-3335-e040-11ac   | SBS1  | SBS13 | 914   | 1661  | 0.1572825 | 4.29E-13  | 9.75E-12  |
| Breast-AdenoCa | f393bb0b-08ed-3335-e040-11ac   | SBS1  | SBS14 | 914   | 668   | 0.1277729 | 6.73E-06  | 7.10E-05  |
| Ovary-AdenoCA  | 504cdfc5-6721-43ef-b31e-fdf52f | SBS1  | SBS2  | 1198  | 1521  | 0.2697187 | 0         | 0         |
| Ovary-AdenoCA  | 504cdfc5-6721-43ef-b31e-fdf52f | SBS1  | SBS3  | 1198  | 6342  | 0.1510396 | 0         | 0         |
| Ovary-AdenoCA  | 504cdfc5-6721-43ef-b31e-fdf52f | SBS1  | SBS13 | 1198  | 1733  | 0.2964842 | 0         | 0         |
| Ovary-AdenoCA  | 504cdfc5-6721-43ef-b31e-fdf52f | SBS2  | SBS3  | 1521  | 6342  | 0.1396718 | 0         | 0         |
| Ovary-AdenoCA  | 504cdfc5-6721-43ef-b31e-fdf52f | SBS2  | SBS4  | 1521  | 81    | 0.2022062 | 0.0037138 | 0.0201337 |
| Ovary-AdenoCA  | 504cdfc5-6721-43ef-b31e-fdf52f | SBS3  | SBS13 | 6342  | 1733  | 0.1601041 | 0         | 0         |

|                 |                                |       |       |       |       |           |           |           |
|-----------------|--------------------------------|-------|-------|-------|-------|-----------|-----------|-----------|
| Ovary-AdenoCA   | 504cdfc5-6721-43ef-b31e-fdf52f | SBS4  | SBS13 | 81    | 1733  | 0.2334495 | 0.0004345 | 0.0031845 |
| Liver-HCC       | d60f880a-c622-11e3-bf01-24c65  | SBS4  | SBS12 | 5636  | 5883  | 0.046063  | 9.91E-06  | 0.0001017 |
| Liver-HCC       | d60f880a-c622-11e3-bf01-24c65  | SBS12 | SBS16 | 5883  | 4263  | 0.0329129 | 0.0094465 | 0.0434027 |
| Lymph-BNHL      | df814571-57f1-4e55-bc1a-c892c  | SBS1  | SBS8  | 497   | 1664  | 0.0905529 | 0.0037614 | 0.0203215 |
| Lymph-BNHL      | df814571-57f1-4e55-bc1a-c892c  | SBS8  | SBS15 | 1664  | 116   | 0.1645806 | 0.0056198 | 0.0283115 |
| Prost-AdenoCA   | c08f65a0-bf4c-462e-9d07-ad56t  | SBS1  | SBS3  | 3617  | 1281  | 0.0649302 | 0.000687  | 0.0047008 |
| Eso-AdenoCa     | 9ae33a63-6b1a-43bf-9205-463c   | SBS1  | SBS17 | 10541 | 14331 | 0.051668  | 1.65E-14  | 4.27E-13  |
| Prost-AdenoCA   | 008aef39-0c97-48ce-9dfd-f12d6  | SBS1  | SBS16 | 903   | 2009  | 0.0898553 | 8.55E-05  | 0.0007322 |
| Panc-AdenoCA    | 5187e77d-f412-4303-8049-11d1   | SBS1  | SBS3  | 1232  | 619   | 0.1682529 | 1.48E-10  | 2.72E-09  |
| Panc-AdenoCA    | 5187e77d-f412-4303-8049-11d1   | SBS1  | SBS8  | 1232  | 10025 | 0.1419474 | 0         | 0         |
| Panc-AdenoCA    | 5187e77d-f412-4303-8049-11d1   | SBS1  | SBS13 | 1232  | 1287  | 0.1288781 | 1.66E-09  | 2.80E-08  |
| Panc-AdenoCA    | 5187e77d-f412-4303-8049-11d1   | SBS8  | SBS13 | 10025 | 1287  | 0.054849  | 0.0020923 | 0.012382  |
| Prost-AdenoCA   | 0bfd1068-3fe1-a95b-e050-11ac   | SBS1  | SBS3  | 889   | 7859  | 0.0955773 | 9.21E-07  | 1.12E-05  |
| Prost-AdenoCA   | 0bfd1068-3fe1-a95b-e050-11ac   | SBS1  | SBS4  | 889   | 3506  | 0.1053829 | 2.89E-07  | 3.81E-06  |
| Prost-AdenoCA   | 0bfd1068-3fe1-a95b-e050-11ac   | SBS1  | SBS11 | 889   | 827   | 0.1057504 | 0.0001378 | 0.0011306 |
| Eso-AdenoCa     | 0250e6f7-2538-4d1f-a8ff-ca34a7 | SBS1  | SBS9  | 10086 | 3146  | 0.0565587 | 4.35E-07  | 5.60E-06  |
| Eso-AdenoCa     | 0250e6f7-2538-4d1f-a8ff-ca34a7 | SBS6  | SBS9  | 2237  | 3146  | 0.0571543 | 0.0003904 | 0.0029061 |
| Eso-AdenoCa     | 0250e6f7-2538-4d1f-a8ff-ca34a7 | SBS9  | SBS17 | 3146  | 7880  | 0.0620023 | 6.22E-08  | 8.81E-07  |
| Panc-AdenoCA    | 0cf9bbc2-cbd5-4b64-8d90-cfa41  | SBS1  | SBS15 | 3688  | 385   | 0.093534  | 0.0044872 | 0.0234738 |
| Panc-AdenoCA    | 0cf9bbc2-cbd5-4b64-8d90-cfa41  | SBS1  | SBS17 | 3688  | 1077  | 0.2070592 | 0         | 0         |
| Panc-AdenoCA    | 0cf9bbc2-cbd5-4b64-8d90-cfa41  | SBS3  | SBS17 | 1198  | 1077  | 0.2081967 | 0         | 0         |
| Panc-AdenoCA    | 0cf9bbc2-cbd5-4b64-8d90-cfa41  | SBS8  | SBS15 | 3144  | 385   | 0.1165948 | 0.0001782 | 0.0014084 |
| Panc-AdenoCA    | 0cf9bbc2-cbd5-4b64-8d90-cfa41  | SBS8  | SBS17 | 3144  | 1077  | 0.1833434 | 0         | 0         |
| Panc-AdenoCA    | 0cf9bbc2-cbd5-4b64-8d90-cfa41  | SBS15 | SBS17 | 385   | 1077  | 0.2878342 | 0         | 0         |
| Stomach-AdenoCA | d91e1a92-837d-44d6-92d8-419f   | SBS7  | SBS17 | 494   | 1155  | 0.1100216 | 0.0004603 | 0.0033478 |
| Stomach-AdenoCA | d91e1a92-837d-44d6-92d8-419f   | SBS8  | SBS17 | 2182  | 1155  | 0.0845751 | 4.06E-05  | 0.000375  |
| Skin-Melanoma   | 22d67778-61fc-4f15-95b8-7e7cf  | SBS7  | SBS11 | 83541 | 7603  | 0.0196693 | 0.009104  | 0.0421067 |
| Lymph-BNHL      | fdf7dfb7-9285-46b3-be60-67216  | SBS1  | SBS3  | 1115  | 1865  | 0.0618041 | 0.0096793 | 0.0442284 |
| Lymph-BNHL      | fdf7dfb7-9285-46b3-be60-67216  | SBS3  | SBS10 | 1865  | 1453  | 0.0797241 | 6.20E-05  | 0.0005494 |
| Lymph-BNHL      | fdf7dfb7-9285-46b3-be60-67216  | SBS8  | SBS9  | 7423  | 18998 | 0.0251635 | 0.0023197 | 0.0135361 |
| Lymph-BNHL      | fdf7dfb7-9285-46b3-be60-67216  | SBS9  | SBS10 | 18998 | 1453  | 0.0639261 | 3.24E-05  | 0.0003059 |
| Head-SCC        | 9fb6b7be-0084-48f7-a256-6d17   | SBS1  | SBS2  | 1596  | 387   | 0.1095617 | 0.0011311 | 0.0073154 |
| Head-SCC        | 9fb6b7be-0084-48f7-a256-6d17   | SBS1  | SBS13 | 1596  | 553   | 0.1860902 | 8.87E-13  | 1.96E-11  |
| Head-SCC        | 9fb6b7be-0084-48f7-a256-6d17   | SBS2  | SBS14 | 387   | 641   | 0.11278   | 0.0043158 | 0.0226907 |
| Head-SCC        | 9fb6b7be-0084-48f7-a256-6d17   | SBS13 | SBS14 | 553   | 641   | 0.1914419 | 7.08E-10  | 1.23E-08  |
| Ovary-AdenoCA   | d4bf6034-aeae-48a6-907b-10e2   | SBS1  | SBS3  | 811   | 14623 | 0.0920675 | 4.40E-06  | 4.81E-05  |
| Liver-HCC       | a1a75f66-c622-11e3-bf01-24c65  | SBS3  | SBS12 | 2921  | 2505  | 0.0720184 | 1.68E-06  | 1.99E-05  |
| Liver-HCC       | a1a75f66-c622-11e3-bf01-24c65  | SBS11 | SBS12 | 2283  | 2505  | 0.0497654 | 0.0053907 | 0.0274442 |
| Liver-HCC       | a1a75f66-c622-11e3-bf01-24c65  | SBS12 | SBS16 | 2505  | 2111  | 0.07315   | 9.48E-06  | 9.80E-05  |
| Eso-AdenoCa     | cb381d49-4546-400c-af02-f877c  | SBS1  | SBS17 | 14350 | 7940  | 0.1839501 | 0         | 0         |
| Liver-HCC       | 3c78970e-c622-11e3-bf01-24c65  | SBS1  | SBS16 | 583   | 9462  | 0.0888363 | 0.000344  | 0.0025853 |
| Breast-AdenoCa  | 097a7d36-905b-72be-e050-11ac   | SBS2  | SBS13 | 35574 | 29820 | 0.0157932 | 0.0006118 | 0.0042886 |
| Eso-AdenoCa     | ba096d4f-5a6c-4c31-ae03-e748   | SBS1  | SBS13 | 4589  | 1159  | 0.0635165 | 0.0011444 | 0.007394  |
| Panc-AdenoCA    | ac02c38e-5fca-4995-b0cc-39b61  | SBS1  | SBS5  | 8865  | 270   | 0.1038917 | 0.0069915 | 0.0339655 |
| Panc-AdenoCA    | ac02c38e-5fca-4995-b0cc-39b61  | SBS1  | SBS14 | 8865  | 493   | 0.1134463 | 1.20E-05  | 0.0001218 |
| Panc-AdenoCA    | ac02c38e-5fca-4995-b0cc-39b61  | SBS5  | SBS14 | 270   | 493   | 0.2146946 | 2.07E-07  | 2.80E-06  |
| Prost-AdenoCA   | b33978c6-a855-4f9d-a0b0-d794   | SBS1  | SBS5  | 915   | 10397 | 0.2263216 | 0         | 0         |
| Prost-AdenoCA   | b33978c6-a855-4f9d-a0b0-d794   | SBS1  | SBS9  | 915   | 784   | 0.2614698 | 0         | 0         |
| Prost-AdenoCA   | b33978c6-a855-4f9d-a0b0-d794   | SBS5  | SBS9  | 10397 | 784   | 0.0599414 | 0.0106139 | 0.0476826 |
| Breast-AdenoCa  | fc8130df-3225-3f96-e040-11ac0  | SBS2  | SBS5  | 5387  | 1455  | 0.0967771 | 9.59E-10  | 1.65E-08  |
| Breast-AdenoCa  | fc8130df-3225-3f96-e040-11ac0  | SBS5  | SBS13 | 1455  | 5929  | 0.115102  | 7.19E-14  | 1.76E-12  |
| Ovary-AdenoCA   | f988e698-9b34-45ce-ba4c-74e0   | SBS9  | SBS14 | 264   | 547   | 0.1458091 | 0.0010301 | 0.0067596 |
| Liver-HCC       | c6bb32f0-c622-11e3-bf01-24c65  | SBS1  | SBS6  | 23702 | 8983  | 0.0736844 | 0         | 0         |
| Liver-HCC       | c6bb32f0-c622-11e3-bf01-24c65  | SBS1  | SBS12 | 23702 | 8392  | 0.0835131 | 0         | 0         |
| Liver-HCC       | c6bb32f0-c622-11e3-bf01-24c65  | SBS1  | SBS15 | 23702 | 3567  | 0.0410455 | 5.81E-05  | 0.0005186 |
| Liver-HCC       | c6bb32f0-c622-11e3-bf01-24c65  | SBS6  | SBS12 | 8983  | 8392  | 0.0251328 | 0.0083288 | 0.0392457 |
| Liver-HCC       | c6bb32f0-c622-11e3-bf01-24c65  | SBS6  | SBS15 | 8983  | 3567  | 0.0416448 | 0.0002851 | 0.0021734 |
| Liver-HCC       | c6bb32f0-c622-11e3-bf01-24c65  | SBS12 | SBS15 | 8392  | 3567  | 0.0606634 | 2.00E-08  | 2.98E-07  |
| Skin-Melanoma   | 897ba508-d74b-46bf-8554-1210   | SBS7  | SBS11 | 62647 | 1651  | 0.1113042 | 0         | 0         |
| Eso-AdenoCa     | abe290ed-67c8-42bb-84f7-0d32   | SBS1  | SBS3  | 3052  | 2815  | 0.1189882 | 0         | 0         |
| Eso-AdenoCa     | abe290ed-67c8-42bb-84f7-0d32   | SBS1  | SBS5  | 3052  | 1810  | 0.0903901 | 1.73E-08  | 2.61E-07  |
| Eso-AdenoCa     | abe290ed-67c8-42bb-84f7-0d32   | SBS1  | SBS6  | 3052  | 2007  | 0.1037496 | 9.57E-12  | 1.90E-10  |
| Eso-AdenoCa     | abe290ed-67c8-42bb-84f7-0d32   | SBS3  | SBS15 | 2815  | 1432  | 0.1477765 | 0         | 0         |
| Eso-AdenoCa     | abe290ed-67c8-42bb-84f7-0d32   | SBS5  | SBS15 | 1810  | 1432  | 0.1138577 | 1.99E-09  | 3.29E-08  |

|                |                               |       |       |        |       |           |           |           |
|----------------|-------------------------------|-------|-------|--------|-------|-----------|-----------|-----------|
| Eso-AdenoCa    | abe290ed-67c8-42bb-84f7-0d32  | SBS6  | SBS15 | 2007   | 1432  | 0.1262303 | 5.43E-12  | 1.11E-10  |
| Prost-AdenoCA  | 9ed8f0b9-d615-44c4-9ec9-e07e  | SBS1  | SBS5  | 432    | 2299  | 0.0958952 | 0.0024905 | 0.0143454 |
| Breast-AdenoCa | f393baf9-2710-9203-e040-11ac  | SBS1  | SBS3  | 313    | 4889  | 0.0952931 | 0.0095675 | 0.0438299 |
| Prost-AdenoCA  | f601cf2f-081f-484d-ab0e-21a8e | SBS1  | SBS6  | 7435   | 1960  | 0.0569617 | 8.50E-05  | 0.0007291 |
| Breast-AdenoCa | fc8130df-8ec8-5b1e-e040-11ac  | SBS2  | SBS3  | 5368   | 8224  | 0.2746791 | 0         | 0         |
| Breast-AdenoCa | fc8130df-8ec8-5b1e-e040-11ac  | SBS2  | SBS7  | 5368   | 1900  | 0.1414044 | 0         | 0         |
| Breast-AdenoCa | fc8130df-8ec8-5b1e-e040-11ac  | SBS2  | SBS13 | 5368   | 7627  | 0.0385013 | 0.0001756 | 0.0013929 |
| Breast-AdenoCa | fc8130df-8ec8-5b1e-e040-11ac  | SBS3  | SBS7  | 8224   | 1900  | 0.1433494 | 0         | 0         |
| Breast-AdenoCa | fc8130df-8ec8-5b1e-e040-11ac  | SBS3  | SBS13 | 8224   | 7627  | 0.2426548 | 0         | 0         |
| Breast-AdenoCa | fc8130df-8ec8-5b1e-e040-11ac  | SBS7  | SBS13 | 1900   | 7627  | 0.1101656 | 2.22E-16  | 6.72E-15  |
| Eso-AdenoCa    | ded8b673-53df-4038-a375-7cd0  | SBS2  | SBS3  | 1139   | 4774  | 0.0535708 | 0.0102033 | 0.0462024 |
| Liver-HCC      | 98d27916-c622-11e3-bf01-24c6  | SBS4  | SBS16 | 5705   | 12880 | 0.1034309 | 0         | 0         |
| Panc-AdenoCA   | 46e166fe-3b20-49ad-98db-42c8  | SBS1  | SBS5  | 2459   | 1197  | 0.143452  | 8.10E-15  | 2.15E-13  |
| Breast-AdenoCa | f221cbb5-eefa-187f-e040-11ac  | SBS1  | SBS3  | 462    | 9327  | 0.097977  | 0.0004272 | 0.0031353 |
| Eso-AdenoCa    | d707940e-0f9d-4da3-9380-90a4  | SBS6  | SBS17 | 2033   | 18127 | 0.0436928 | 0.0018616 | 0.0111749 |
| Eso-AdenoCa    | d707940e-0f9d-4da3-9380-90a4  | SBS8  | SBS17 | 4010   | 18127 | 0.039774  | 6.15E-05  | 0.0005462 |
| Eso-AdenoCa    | 371235d9-55b8-40a7-8cd6-baa7  | SBS1  | SBS17 | 3684   | 20513 | 0.0666786 | 1.74E-12  | 3.74E-11  |
| Eso-AdenoCa    | 371235d9-55b8-40a7-8cd6-baa7  | SBS8  | SBS17 | 4030   | 20513 | 0.0729187 | 5.55E-16  | 1.65E-14  |
| Eso-AdenoCa    | 371235d9-55b8-40a7-8cd6-baa7  | SBS15 | SBS17 | 566    | 20513 | 0.105579  | 9.29E-06  | 9.64E-05  |
| Skin-Melanoma  | eeddf701-93f9-4f10-85cb-9dce1 | SBS7  | SBS11 | 19399  | 625   | 0.0829876 | 0.0004776 | 0.00344   |
| Kidney-RCC     | 04db8bef-8777-48ac-bc2e-3c9a  | SBS2  | SBS3  | 524    | 5228  | 0.0909095 | 0.0007624 | 0.0051375 |
| Kidney-RCC     | 04db8bef-8777-48ac-bc2e-3c9a  | SBS2  | SBS16 | 524    | 844   | 0.1144767 | 0.000418  | 0.0030816 |
| Kidney-RCC     | 04db8bef-8777-48ac-bc2e-3c9a  | SBS15 | SBS16 | 532    | 844   | 0.0905106 | 0.0095301 | 0.0437229 |
| Liver-HCC      | 56c846d6-c622-11e3-bf01-24c6  | SBS4  | SBS16 | 2501   | 3951  | 0.1027385 | 1.82E-14  | 4.66E-13  |
| Ovary-AdenoCA  | da43386c-47f8-4e03-b6ca-8b94  | SBS1  | SBS16 | 781    | 234   | 0.1205281 | 0.0106934 | 0.0479366 |
| Skin-Melanoma  | 561fd34c-7c7d-4df0-bbfc-3d311 | SBS4  | SBS7  | 5472   | 68528 | 0.1549474 | 0         | 0         |
| Skin-Melanoma  | 561fd34c-7c7d-4df0-bbfc-3d311 | SBS4  | SBS11 | 5472   | 4494  | 0.138336  | 0         | 0         |
| Liver-HCC      | bba106ce-c622-11e3-bf01-24c6  | SBS4  | SBS16 | 437    | 6870  | 0.0909609 | 0.00223   | 0.0130611 |
| Liver-HCC      | bba106ce-c622-11e3-bf01-24c6  | SBS14 | SBS16 | 775    | 6870  | 0.0669756 | 0.0038684 | 0.020792  |
| Prost-AdenoCA  | 4eac784b-084a-4106-9a76-2d9f  | SBS1  | SBS12 | 2353   | 483   | 0.091429  | 0.0024623 | 0.0142226 |
| Prost-AdenoCA  | 4eac784b-084a-4106-9a76-2d9f  | SBS9  | SBS15 | 141    | 36    | 0.3144208 | 0.0068941 | 0.0335446 |
| Prost-AdenoCA  | 4eac784b-084a-4106-9a76-2d9f  | SBS12 | SBS15 | 483    | 36    | 0.2926156 | 0.0064469 | 0.0316638 |
| Skin-Melanoma  | 1d4a091d-fe65-49c0-8810-5a95  | SBS7  | SBS11 | 144306 | 8381  | 0.025413  | 7.21E-05  | 0.0006273 |
| Bone-Osteosarc | f82d213f-bc99-5b1d-e040-11ac  | SBS3  | SBS17 | 3228   | 2076  | 0.0787313 | 3.15E-07  | 4.11E-06  |
| Bone-Osteosarc | f82d213f-bc99-5b1d-e040-11ac  | SBS6  | SBS17 | 637    | 2076  | 0.1055412 | 3.85E-05  | 0.0003587 |
| Bone-Osteosarc | f82d213f-bc99-5b1d-e040-11ac  | SBS13 | SBS17 | 1263   | 2076  | 0.0975371 | 6.49E-07  | 8.05E-06  |
| Bone-Osteosarc | f82d213f-bc99-5b1d-e040-11ac  | SBS16 | SBS17 | 2083   | 2076  | 0.0779024 | 6.61E-06  | 6.99E-05  |
| Liver-HCC      | 3b02a7a7-e5bc-4e77-b691-521e  | SBS4  | SBS16 | 1387   | 5224  | 0.0499877 | 0.008361  | 0.0393679 |
| Liver-HCC      | 3b02a7a7-e5bc-4e77-b691-521e  | SBS8  | SBS16 | 5581   | 5224  | 0.0486128 | 5.79E-06  | 6.18E-05  |
| Eso-AdenoCa    | c971ffa7-ce37-4138-b028-598a  | SBS1  | SBS8  | 1094   | 2034  | 0.0767887 | 0.0004546 | 0.0033164 |
| Eso-AdenoCa    | e7a0889c-dd8c-4230-9c63-384f  | SBS1  | SBS6  | 5547   | 4055  | 0.0366497 | 0.0036984 | 0.0200673 |
| Eso-AdenoCa    | e7a0889c-dd8c-4230-9c63-384f  | SBS1  | SBS17 | 5547   | 8326  | 0.1015344 | 0         | 0         |
| Eso-AdenoCa    | e7a0889c-dd8c-4230-9c63-384f  | SBS6  | SBS17 | 4055   | 8326  | 0.0863894 | 0         | 0         |
| Eso-AdenoCa    | e7a0889c-dd8c-4230-9c63-384f  | SBS8  | SBS17 | 1728   | 8326  | 0.1197564 | 0         | 0         |
| Skin-Melanoma  | 1cd0acf2-3116-4dfa-a063-0a435 | SBS1  | SBS3  | 730    | 2240  | 0.0752813 | 0.0038978 | 0.0209063 |
| Skin-Melanoma  | 1cd0acf2-3116-4dfa-a063-0a435 | SBS1  | SBS8  | 730    | 474   | 0.1061673 | 0.0030717 | 0.0171419 |
| Liver-HCC      | d3ad5b5a-c622-11e3-bf01-24c6  | SBS8  | SBS12 | 3424   | 3919  | 0.046782  | 0.0006718 | 0.0046263 |
| Eso-AdenoCa    | 9ba6be6d-2032-444b-ab3c-dbee  | SBS1  | SBS8  | 2173   | 3447  | 0.0548411 | 0.0006597 | 0.0045631 |
| Eso-AdenoCa    | 9ba6be6d-2032-444b-ab3c-dbee  | SBS1  | SBS9  | 2173   | 445   | 0.1218168 | 3.47E-05  | 0.000325  |
| Eso-AdenoCa    | 9ba6be6d-2032-444b-ab3c-dbee  | SBS8  | SBS17 | 3447   | 5074  | 0.0458187 | 0.0003616 | 0.0027073 |
| Eso-AdenoCa    | 9ba6be6d-2032-444b-ab3c-dbee  | SBS9  | SBS17 | 445    | 5074  | 0.1117059 | 7.36E-05  | 0.0006397 |
| Lymph-CLL      | 3e8a2c90-e747-4a22-bc9e-0b06  | SBS3  | SBS9  | 213    | 667   | 0.1699573 | 0.000178  | 0.0014084 |
| Lymph-CLL      | 3e8a2c90-e747-4a22-bc9e-0b06  | SBS9  | SBS12 | 667    | 997   | 0.1002994 | 0.0006442 | 0.0044803 |
| Panc-AdenoCA   | 046d7386-95c8-4501-9e55-c85b  | SBS1  | SBS13 | 1083   | 271   | 0.1252636 | 0.0022223 | 0.0130283 |
| Panc-AdenoCA   | 046d7386-95c8-4501-9e55-c85b  | SBS5  | SBS13 | 1648   | 271   | 0.1114579 | 0.006163  | 0.0305325 |
| Ovary-AdenoCA  | 5b560f4c-d2a3-43fa-b394-abef7 | SBS1  | SBS7  | 615    | 221   | 0.1297576 | 0.0083834 | 0.0393843 |
| Ovary-AdenoCA  | 5b560f4c-d2a3-43fa-b394-abef7 | SBS1  | SBS8  | 615    | 3350  | 0.129062  | 6.07E-08  | 8.63E-07  |
| Ovary-AdenoCA  | 5b560f4c-d2a3-43fa-b394-abef7 | SBS1  | SBS12 | 615    | 360   | 0.1597561 | 1.85E-05  | 0.0001811 |
| Lymph-BNHL     | dbae3c4e-6d66-483a-a611-7285  | SBS3  | SBS6  | 2403   | 4943  | 0.0498983 | 0.000637  | 0.0044458 |
| Lymph-BNHL     | dbae3c4e-6d66-483a-a611-7285  | SBS6  | SBS9  | 4943   | 18525 | 0.059207  | 2.63E-12  | 5.56E-11  |
| Panc-AdenoCA   | 129459c1-38be-45da-bb87-1884  | SBS1  | SBS5  | 2073   | 3423  | 0.0485242 | 0.0045762 | 0.0238791 |
| Lymph-BNHL     | f04aefc0-eb12-4ab9-928e-7bcf2 | SBS1  | SBS9  | 1129   | 926   | 0.0793827 | 0.0032844 | 0.0181475 |
| Lymph-BNHL     | f04aefc0-eb12-4ab9-928e-7bcf2 | SBS9  | SBS11 | 926    | 301   | 0.1072164 | 0.0107868 | 0.0482517 |
| Kidney-RCC     | b30dfb8b-8288-4e5a-afc2-3d5bc | SBS1  | SBS3  | 380    | 64    | 0.3146382 | 3.90E-05  | 0.0003632 |

|                 |                                |       |       |        |       |           |           |           |
|-----------------|--------------------------------|-------|-------|--------|-------|-----------|-----------|-----------|
| Kidney-RCC      | b30dfb8b-8288-4e5a-afc2-3d5bc  | SBS1  | SBS5  | 380    | 5472  | 0.2587719 | 0         | 0         |
| Skin-Melanoma   | 8ca665f8-fe78-48bf-8c0f-c606d9 | SBS7  | SBS11 | 162751 | 10673 | 0.0323007 | 1.68E-09  | 2.81E-08  |
| Skin-Melanoma   | f07b9192-c86f-4ee4-a3b5-feb9c  | SBS7  | SBS11 | 78460  | 2616  | 0.0932481 | 0         | 0         |
| Bone-Osteosarc  | f86ae246-2492-9785-e040-11ac   | SBS3  | SBS9  | 307    | 281   | 0.1372483 | 0.0079536 | 0.0377901 |
| Bone-Osteosarc  | f86ae246-2492-9785-e040-11ac   | SBS9  | SBS14 | 281    | 920   | 0.1138132 | 0.0075711 | 0.0363587 |
| Panc-AdenoCA    | a3210fd0-344c-468e-8ff2-2d086  | SBS1  | SBS2  | 1576   | 753   | 0.5283848 | 0         | 0         |
| Panc-AdenoCA    | a3210fd0-344c-468e-8ff2-2d086  | SBS1  | SBS13 | 1576   | 597   | 0.5480852 | 0         | 0         |
| Panc-AdenoCA    | a3210fd0-344c-468e-8ff2-2d086  | SBS2  | SBS5  | 753    | 259   | 0.4894553 | 0         | 0         |
| Panc-AdenoCA    | a3210fd0-344c-468e-8ff2-2d086  | SBS2  | SBS6  | 753    | 229   | 0.5075245 | 0         | 0         |
| Panc-AdenoCA    | a3210fd0-344c-468e-8ff2-2d086  | SBS2  | SBS8  | 753    | 1106  | 0.4943973 | 0         | 0         |
| Panc-AdenoCA    | a3210fd0-344c-468e-8ff2-2d086  | SBS5  | SBS13 | 259    | 597   | 0.5031722 | 0         | 0         |
| Panc-AdenoCA    | a3210fd0-344c-468e-8ff2-2d086  | SBS6  | SBS13 | 229    | 597   | 0.5247782 | 0         | 0         |
| Panc-AdenoCA    | a3210fd0-344c-468e-8ff2-2d086  | SBS8  | SBS13 | 1106   | 597   | 0.5113785 | 0         | 0         |
| Kidney-RCC      | d4c6061b-5019-4564-806d-4e75   | SBS3  | SBS16 | 5483   | 1418  | 0.0590502 | 0.0007741 | 0.0052052 |
| Kidney-RCC      | d4c6061b-5019-4564-806d-4e75   | SBS7  | SBS16 | 1276   | 1418  | 0.0773176 | 0.0006511 | 0.0045187 |
| Eso-AdenoCa     | d4cf11be-3bd7-403b-9722-91d8   | SBS9  | SBS17 | 5082   | 14285 | 0.1020829 | 0         | 0         |
| Eso-AdenoCa     | d4cf11be-3bd7-403b-9722-91d8   | SBS16 | SBS17 | 691    | 14285 | 0.0772848 | 0.0007612 | 0.0051352 |
| Eso-AdenoCa     | d1842491-29ff-4801-8c8a-4d61   | SBS1  | SBS17 | 3403   | 17133 | 0.1014191 | 0         | 0         |
| Eso-AdenoCa     | d1842491-29ff-4801-8c8a-4d61   | SBS15 | SBS17 | 2561   | 17133 | 0.0730084 | 9.68E-11  | 1.82E-09  |
| Breast-AdenoCa  | fc8130e0-a774-d834-e040-11ac   | SBS1  | SBS7  | 1463   | 584   | 0.1352716 | 4.65E-07  | 5.97E-06  |
| Breast-AdenoCa  | fc8130e0-a774-d834-e040-11ac   | SBS1  | SBS12 | 1463   | 542   | 0.1865297 | 2.23E-12  | 4.75E-11  |
| Breast-AdenoCa  | fc8130e0-a774-d834-e040-11ac   | SBS1  | SBS15 | 1463   | 470   | 0.1374878 | 2.89E-06  | 3.28E-05  |
| Breast-AdenoCa  | fc8130e0-a774-d834-e040-11ac   | SBS5  | SBS7  | 499    | 584   | 0.1970654 | 1.68E-09  | 2.81E-08  |
| Breast-AdenoCa  | fc8130e0-a774-d834-e040-11ac   | SBS5  | SBS12 | 499    | 542   | 0.1223961 | 0.0008325 | 0.0055415 |
| Breast-AdenoCa  | fc8130e0-a774-d834-e040-11ac   | SBS7  | SBS12 | 584    | 542   | 0.3137606 | 0         | 0         |
| Breast-AdenoCa  | fc8130e0-a774-d834-e040-11ac   | SBS7  | SBS15 | 584    | 470   | 0.2668901 | 1.11E-16  | 3.39E-15  |
| Liver-HCC       | c5ad7238-c622-11e3-bf01-24c6   | SBS2  | SBS4  | 1500   | 4409  | 0.0798104 | 1.28E-06  | 1.54E-05  |
| Liver-HCC       | c5ad7238-c622-11e3-bf01-24c6   | SBS2  | SBS16 | 1500   | 6773  | 0.0552706 | 0.001103  | 0.0071557 |
| Liver-HCC       | c5ad7238-c622-11e3-bf01-24c6   | SBS4  | SBS8  | 4409   | 858   | 0.0641311 | 0.0054359 | 0.0276067 |
| Liver-HCC       | c5ad7238-c622-11e3-bf01-24c6   | SBS4  | SBS16 | 4409   | 6773  | 0.0367857 | 0.0014527 | 0.0090585 |
| Prost-AdenoCA   | 0c0038ff-6cc8-b0b0-e050-11ac   | SBS8  | SBS9  | 863    | 1265  | 0.0776618 | 0.0041064 | 0.0217541 |
| Prost-AdenoCA   | a1af7c42-47af-435c-bb51-b932e  | SBS1  | SBS8  | 3070   | 199   | 0.1586712 | 0.0001638 | 0.0013107 |
| Panc-AdenoCA    | 079bcb09-a075-4313-9a3e-dd67   | SBS1  | SBS2  | 5953   | 970   | 0.1847477 | 0         | 0         |
| Panc-AdenoCA    | 079bcb09-a075-4313-9a3e-dd67   | SBS1  | SBS3  | 5953   | 1206  | 0.0639388 | 0.0005496 | 0.0039048 |
| Panc-AdenoCA    | 079bcb09-a075-4313-9a3e-dd67   | SBS2  | SBS3  | 970    | 1206  | 0.143328  | 5.11E-10  | 8.95E-09  |
| Lymph-BNHL      | 4adc846a-42cb-4ebd-a954-e31e   | SBS1  | SBS5  | 5691   | 5903  | 0.0343264 | 0.0021653 | 0.0127539 |
| Lymph-BNHL      | 4adc846a-42cb-4ebd-a954-e31e   | SBS1  | SBS9  | 5691   | 6730  | 0.049362  | 5.96E-07  | 7.48E-06  |
| Liver-HCC       | cf2d34c4-c622-11e3-bf01-24c6   | SBS3  | SBS12 | 600    | 349   | 0.1295989 | 0.0012078 | 0.0077385 |
| Liver-HCC       | cf2d34c4-c622-11e3-bf01-24c6   | SBS5  | SBS12 | 13119  | 349   | 0.0911524 | 0.0070405 | 0.0341506 |
| Liver-HCC       | cf2d34c4-c622-11e3-bf01-24c6   | SBS12 | SBS17 | 349    | 834   | 0.1185917 | 0.0019744 | 0.0117958 |
| Eso-AdenoCa     | 33992441-4f34-42f2-ba87-6ddd   | SBS1  | SBS3  | 755    | 5603  | 0.0732082 | 0.0015986 | 0.0098222 |
| Eso-AdenoCa     | 33992441-4f34-42f2-ba87-6ddd   | SBS3  | SBS13 | 5603   | 675   | 0.0714485 | 0.0042643 | 0.0224763 |
| Biliary-AdenoCA | 56cc8740-b132-4cbc-b513-f0b5   | SBS1  | SBS2  | 6238   | 2980  | 0.0588155 | 1.74E-06  | 2.06E-05  |
| Biliary-AdenoCA | 56cc8740-b132-4cbc-b513-f0b5   | SBS2  | SBS3  | 2980   | 890   | 0.0735993 | 0.0011928 | 0.007667  |
| Biliary-AdenoCA | 56cc8740-b132-4cbc-b513-f0b5   | SBS2  | SBS4  | 2980   | 730   | 0.0790521 | 0.001313  | 0.0083114 |
| Lymph-CLL       | c13d7ee5-2bf0-43e4-9cd3-9326   | SBS1  | SBS3  | 726    | 489   | 0.1522841 | 2.60E-06  | 2.99E-05  |
| Lymph-CLL       | c13d7ee5-2bf0-43e4-9cd3-9326   | SBS1  | SBS5  | 726    | 277   | 0.1830564 | 2.92E-06  | 3.31E-05  |
| Lymph-CLL       | c13d7ee5-2bf0-43e4-9cd3-9326   | SBS1  | SBS8  | 726    | 2156  | 0.1449935 | 2.42E-10  | 4.37E-09  |
| Lymph-CLL       | c13d7ee5-2bf0-43e4-9cd3-9326   | SBS1  | SBS9  | 726    | 772   | 0.4388337 | 0         | 0         |
| Lymph-CLL       | c13d7ee5-2bf0-43e4-9cd3-9326   | SBS3  | SBS9  | 489    | 772   | 0.2906323 | 0         | 0         |
| Lymph-CLL       | c13d7ee5-2bf0-43e4-9cd3-9326   | SBS3  | SBS11 | 489    | 619   | 0.1405592 | 4.10E-05  | 0.000378  |
| Lymph-CLL       | c13d7ee5-2bf0-43e4-9cd3-9326   | SBS5  | SBS9  | 277    | 772   | 0.2632714 | 1.07E-12  | 2.33E-11  |
| Lymph-CLL       | c13d7ee5-2bf0-43e4-9cd3-9326   | SBS5  | SBS11 | 277    | 619   | 0.1758513 | 1.45E-05  | 0.0001449 |
| Lymph-CLL       | c13d7ee5-2bf0-43e4-9cd3-9326   | SBS8  | SBS9  | 2156   | 772   | 0.3054159 | 0         | 0         |
| Lymph-CLL       | c13d7ee5-2bf0-43e4-9cd3-9326   | SBS8  | SBS11 | 2156   | 619   | 0.1223051 | 1.13E-06  | 1.37E-05  |
| Lymph-CLL       | c13d7ee5-2bf0-43e4-9cd3-9326   | SBS9  | SBS11 | 772    | 619   | 0.4237112 | 0         | 0         |
| Liver-HCC       | 4c8afa82-c623-11e3-bf01-24c6   | SBS3  | SBS12 | 954    | 2377  | 0.0637358 | 0.0079244 | 0.0377088 |
| Bone-Osteosarc  | f866123a-9eb0-e856-e040-11ac   | SBS1  | SBS2  | 386    | 343   | 0.1281137 | 0.0051507 | 0.0263937 |
| Bone-Osteosarc  | f866123a-9eb0-e856-e040-11ac   | SBS1  | SBS3  | 386    | 4992  | 0.1022714 | 0.0011116 | 0.0071964 |
| Bone-Osteosarc  | f866123a-9eb0-e856-e040-11ac   | SBS3  | SBS4  | 4992   | 361   | 0.1022067 | 0.0017636 | 0.0106995 |
| Liver-HCC       | 3b41cb48-c623-11e3-bf01-24c6   | SBS3  | SBS8  | 1502   | 2632  | 0.0650344 | 0.0006137 | 0.0042974 |
| Bone-Epith      | fc95d5ce-6899-62f1-e040-11ac   | SBS1  | SBS5  | 483    | 2965  | 0.0967457 | 0.0008403 | 0.0055783 |
| Bone-Epith      | fc95d5ce-6899-62f1-e040-11ac   | SBS1  | SBS8  | 483    | 609   | 0.1090883 | 0.0032866 | 0.0181475 |
| Bone-Epith      | fc95d5ce-6899-62f1-e040-11ac   | SBS2  | SBS3  | 1046   | 92    | 0.183785  | 0.0066087 | 0.0323315 |



|                 |                               |       |       |        |       |           |           |           |
|-----------------|-------------------------------|-------|-------|--------|-------|-----------|-----------|-----------|
| Bone-Epith      | fc95d5ce-6899-62f1-e040-11ac0 | SBS2  | SBS5  | 1046   | 2965  | 0.114223  | 3.46E-09  | 5.58E-08  |
| Bone-Epith      | fc95d5ce-6899-62f1-e040-11ac0 | SBS2  | SBS8  | 1046   | 609   | 0.1321886 | 2.88E-06  | 3.28E-05  |
| Bone-Epith      | fc95d5ce-6899-62f1-e040-11ac0 | SBS3  | SBS13 | 92     | 536   | 0.2064406 | 0.0024794 | 0.0142948 |
| Bone-Epith      | fc95d5ce-6899-62f1-e040-11ac0 | SBS5  | SBS13 | 2965   | 536   | 0.1315723 | 2.99E-07  | 3.92E-06  |
| Bone-Epith      | fc95d5ce-6899-62f1-e040-11ac0 | SBS8  | SBS13 | 609    | 536   | 0.1487728 | 6.61E-06  | 6.99E-05  |
| Ovary-AdenoCA   | bbe59385-5f83-43f6-a485-517c  | SBS4  | SBS6  | 4161   | 3810  | 0.091626  | 6.33E-15  | 1.69E-13  |
| Ovary-AdenoCA   | bbe59385-5f83-43f6-a485-517c  | SBS4  | SBS12 | 4161   | 2247  | 0.0662375 | 5.50E-06  | 5.91E-05  |
| Eso-AdenoCa     | 35dc84c1-476c-4d48-ae23-622b  | SBS1  | SBS13 | 5628   | 1963  | 0.0534182 | 0.0004941 | 0.0035554 |
| Eso-AdenoCa     | 35dc84c1-476c-4d48-ae23-622b  | SBS1  | SBS17 | 5628   | 21764 | 0.0759598 | 0         | 0         |
| Eso-AdenoCa     | 35dc84c1-476c-4d48-ae23-622b  | SBS3  | SBS13 | 966    | 1963  | 0.0646552 | 0.008919  | 0.0414962 |
| Eso-AdenoCa     | 35dc84c1-476c-4d48-ae23-622b  | SBS3  | SBS17 | 966    | 21764 | 0.0678035 | 0.0004051 | 0.0030009 |
| Eso-AdenoCa     | 35dc84c1-476c-4d48-ae23-622b  | SBS9  | SBS13 | 4654   | 1963  | 0.0718402 | 1.29E-06  | 1.55E-05  |
| Eso-AdenoCa     | 35dc84c1-476c-4d48-ae23-622b  | SBS9  | SBS17 | 4654   | 21764 | 0.055315  | 1.29E-10  | 2.40E-09  |
| Eso-AdenoCa     | 35dc84c1-476c-4d48-ae23-622b  | SBS13 | SBS17 | 1963   | 21764 | 0.1240884 | 0         | 0         |
| Eso-AdenoCa     | 0e872e0d-4711-4364-a5d0-6be   | SBS6  | SBS17 | 5043   | 26108 | 0.0334    | 0.0001606 | 0.0012867 |
| Eso-AdenoCa     | 0e872e0d-4711-4364-a5d0-6be   | SBS9  | SBS17 | 10307  | 26108 | 0.046119  | 4.45E-14  | 1.09E-12  |
| Breast-AdenoCa  | fc8130df-35ac-2304-e040-11ac0 | SBS1  | SBS4  | 701    | 1051  | 0.0857997 | 0.004094  | 0.0217064 |
| Breast-AdenoCa  | fc8130df-35ac-2304-e040-11ac0 | SBS1  | SBS8  | 701    | 2032  | 0.0884416 | 0.0005754 | 0.0040612 |
| Liver-HCC       | 3f99ae0e-c623-11e3-bf01-24c6  | SBS3  | SBS4  | 3820   | 5787  | 0.0710984 | 1.58E-10  | 2.88E-09  |
| Liver-HCC       | 3f99ae0e-c623-11e3-bf01-24c6  | SBS3  | SBS12 | 3820   | 8183  | 0.1188719 | 0         | 0         |
| Liver-HCC       | 3f99ae0e-c623-11e3-bf01-24c6  | SBS4  | SBS12 | 5787   | 8183  | 0.0571415 | 4.87E-10  | 8.60E-09  |
| Liver-HCC       | 3f99ae0e-c623-11e3-bf01-24c6  | SBS12 | SBS15 | 8183   | 976   | 0.0890923 | 1.95E-06  | 2.27E-05  |
| Liver-HCC       | 4255582e-c622-11e3-bf01-24c6  | SBS3  | SBS12 | 1025   | 4244  | 0.0574614 | 0.0085756 | 0.0400772 |
| Eso-AdenoCa     | 47874ff4-0b1c-4a31-9192-2a10  | SBS1  | SBS3  | 11302  | 3204  | 0.0534702 | 1.26E-06  | 1.52E-05  |
| Eso-AdenoCa     | 47874ff4-0b1c-4a31-9192-2a10  | SBS1  | SBS4  | 11302  | 1691  | 0.0429791 | 0.0087297 | 0.0406457 |
| Eso-AdenoCa     | 47874ff4-0b1c-4a31-9192-2a10  | SBS3  | SBS4  | 3204   | 1691  | 0.0911689 | 2.04E-08  | 3.05E-07  |
| Eso-AdenoCa     | 47874ff4-0b1c-4a31-9192-2a10  | SBS3  | SBS6  | 3204   | 3215  | 0.059305  | 2.50E-05  | 0.0002422 |
| Liver-HCC       | 47050918-c623-11e3-bf01-24c6  | SBS8  | SBS12 | 1814   | 3293  | 0.1358108 | 0         | 0         |
| Liver-HCC       | a4ca18dc-c622-11e3-bf01-24c6  | SBS12 | SBS16 | 4742   | 8129  | 0.0692085 | 6.93E-13  | 1.55E-11  |
| Lymph-BNHL      | 9b3e7a03-cf8c-4da8-bc36-2012  | SBS1  | SBS3  | 779    | 288   | 0.1687438 | 1.26E-05  | 0.0001272 |
| Lymph-BNHL      | 9b3e7a03-cf8c-4da8-bc36-2012  | SBS1  | SBS5  | 779    | 11743 | 0.0708591 | 0.0013032 | 0.0082663 |
| Lymph-BNHL      | 9b3e7a03-cf8c-4da8-bc36-2012  | SBS1  | SBS17 | 779    | 3305  | 0.0804239 | 0.0005746 | 0.0040597 |
| Lymph-BNHL      | 9b3e7a03-cf8c-4da8-bc36-2012  | SBS3  | SBS5  | 288    | 11743 | 0.1160975 | 0.0010233 | 0.0067224 |
| Lymph-BNHL      | 9b3e7a03-cf8c-4da8-bc36-2012  | SBS3  | SBS12 | 288    | 176   | 0.1688763 | 0.0039352 | 0.0210276 |
| Lymph-BNHL      | 9b3e7a03-cf8c-4da8-bc36-2012  | SBS3  | SBS17 | 288    | 3305  | 0.1219942 | 0.0007525 | 0.0050934 |
| Skin-Melanoma   | bcefbf6a-80ff-4825-9d3a-492e  | SBS7  | SBS11 | 114492 | 6999  | 0.0510305 | 2.44E-15  | 6.93E-14  |
| Prost-AdenoCA   | 51adf6cf-f422-4d7e-aa46-cc9bf | SBS1  | SBS5  | 2025   | 1624  | 0.0552122 | 0.0082176 | 0.0388384 |
| Panc-AdenoCA    | 4aa7eabc-0419-4897-b7af-5d    | SBS2  | SBS3  | 1056   | 8588  | 0.0792424 | 1.49E-05  | 0.0001481 |
| Panc-AdenoCA    | 4aa7eabc-0419-4897-b7af-5d    | SBS2  | SBS4  | 1056   | 1119  | 0.0868445 | 0.0005521 | 0.0039164 |
| Panc-AdenoCA    | 4aa7eabc-0419-4897-b7af-5d    | SBS3  | SBS6  | 8588   | 1593  | 0.0565141 | 0.0003744 | 0.0027964 |
| Eso-AdenoCa     | dd7d623b-b9af-4147-9aa6-e097  | SBS1  | SBS17 | 3832   | 15783 | 0.0660988 | 3.98E-12  | 8.23E-11  |
| Biliary-AdenoCA | da5b9926-c622-11e3-bf01-24c6  | SBS3  | SBS6  | 1361   | 1376  | 0.138547  | 7.82E-12  | 1.56E-10  |
| Biliary-AdenoCA | da5b9926-c622-11e3-bf01-24c6  | SBS3  | SBS12 | 1361   | 514   | 0.1029442 | 0.0007358 | 0.0049957 |
| Biliary-AdenoCA | da5b9926-c622-11e3-bf01-24c6  | SBS6  | SBS7  | 1376   | 1012  | 0.1525272 | 3.29E-12  | 6.88E-11  |
| Biliary-AdenoCA | da5b9926-c622-11e3-bf01-24c6  | SBS6  | SBS12 | 1376   | 514   | 0.1021938 | 0.0008063 | 0.0053925 |
| Biliary-AdenoCA | da5b9926-c622-11e3-bf01-24c6  | SBS6  | SBS17 | 1376   | 562   | 0.1930967 | 2.39E-13  | 5.52E-12  |
| Biliary-AdenoCA | da5b9926-c622-11e3-bf01-24c6  | SBS7  | SBS12 | 1012   | 514   | 0.1101721 | 0.0005097 | 0.003657  |
| Biliary-AdenoCA | da5b9926-c622-11e3-bf01-24c6  | SBS9  | SBS17 | 62     | 562   | 0.2338997 | 0.0044416 | 0.023274  |
| Biliary-AdenoCA | da5b9926-c622-11e3-bf01-24c6  | SBS12 | SBS17 | 514    | 562   | 0.1573383 | 3.38E-06  | 3.79E-05  |
| Lymph-NOS       | f075dcd8-4b6a-4186-bfc5-c1787 | SBS9  | SBS17 | 10643  | 2567  | 0.0559608 | 4.74E-06  | 5.15E-05  |
| Prost-AdenoCA   | 4c5228b5-bf31-4abd-a47c-d088  | SBS8  | SBS9  | 1364   | 1051  | 0.1035238 | 5.96E-06  | 6.34E-05  |
| Lymph-BNHL      | dd8f3e1c-6ed6-41c2-957d-6f67  | SBS1  | SBS9  | 330    | 1207  | 0.1055459 | 0.006216  | 0.0307462 |
| Lymph-BNHL      | dd8f3e1c-6ed6-41c2-957d-6f67  | SBS1  | SBS16 | 330    | 1650  | 0.1321212 | 0.0001353 | 0.0011117 |
| Kidney-RCC      | 15a93657-0521-430a-a816-bf08  | SBS3  | SBS14 | 1961   | 684   | 0.0985467 | 0.0001055 | 0.0008853 |
| Kidney-RCC      | 15a93657-0521-430a-a816-bf08  | SBS4  | SBS14 | 556    | 684   | 0.1043165 | 0.0025244 | 0.0145006 |
| Skin-Melanoma   | a84915de-6562-4836-86f9-f2a0  | SBS7  | SBS11 | 113487 | 7351  | 0.0261483 | 0.0001588 | 0.0012795 |
| Stomach-AdenoCA | bc0dee07-de20-44d6-be65-05af  | SBS1  | SBS3  | 5632   | 4631  | 0.0367471 | 0.0020907 | 0.012382  |
| Stomach-AdenoCA | bc0dee07-de20-44d6-be65-05af  | SBS1  | SBS8  | 5632   | 7834  | 0.0468425 | 1.14E-06  | 1.38E-05  |
| Liver-HCC       | fbdb899a0-c622-11e3-bf01-24c6 | SBS4  | SBS5  | 832    | 1724  | 0.1079751 | 4.15E-06  | 4.56E-05  |
| Liver-HCC       | fbdb899a0-c622-11e3-bf01-24c6 | SBS4  | SBS16 | 832    | 12964 | 0.115375  | 1.83E-09  | 3.03E-08  |
| Liver-HCC       | fbdb899a0-c622-11e3-bf01-24c6 | SBS4  | SBS17 | 832    | 336   | 0.1180746 | 0.0025276 | 0.0145058 |
| Prost-AdenoCA   | f9c26646-d2b0-cf30-e040-11ac0 | SBS3  | SBS6  | 1562   | 855   | 0.0938188 | 0.0001193 | 0.0009902 |
| Ovary-AdenoCA   | f1504811-8363-41e6-b43c-6245  | SBS1  | SBS2  | 760    | 586   | 0.3163059 | 0         | 0         |
| Ovary-AdenoCA   | f1504811-8363-41e6-b43c-6245  | SBS1  | SBS3  | 760    | 1236  | 0.1292156 | 2.99E-07  | 3.92E-06  |

|                |                                      |       |        |       |           |           |           |
|----------------|--------------------------------------|-------|--------|-------|-----------|-----------|-----------|
| Ovary-AdenoCA  | f1504811-8363-41e6-b43c-6245: SBS1   | SBS5  | 760    | 2172  | 0.0893283 | 0.0002506 | 0.0019266 |
| Ovary-AdenoCA  | f1504811-8363-41e6-b43c-6245: SBS1   | SBS13 | 760    | 762   | 0.3705899 | 0         | 0         |
| Ovary-AdenoCA  | f1504811-8363-41e6-b43c-6245: SBS2   | SBS3  | 586    | 1236  | 0.2065123 | 3.77E-15  | 1.04E-13  |
| Ovary-AdenoCA  | f1504811-8363-41e6-b43c-6245: SBS2   | SBS5  | 586    | 2172  | 0.2558548 | 0         | 0         |
| Ovary-AdenoCA  | f1504811-8363-41e6-b43c-6245: SBS2   | SBS8  | 586    | 280   | 0.2885422 | 3.97E-14  | 9.88E-13  |
| Ovary-AdenoCA  | f1504811-8363-41e6-b43c-6245: SBS2   | SBS11 | 586    | 1055  | 0.2693221 | 0         | 0         |
| Ovary-AdenoCA  | f1504811-8363-41e6-b43c-6245: SBS3   | SBS11 | 1236   | 1055  | 0.0857467 | 0.0004636 | 0.0033663 |
| Ovary-AdenoCA  | f1504811-8363-41e6-b43c-6245: SBS3   | SBS13 | 1236   | 762   | 0.2660156 | 0         | 0         |
| Ovary-AdenoCA  | f1504811-8363-41e6-b43c-6245: SBS5   | SBS13 | 2172   | 762   | 0.3115819 | 0         | 0         |
| Ovary-AdenoCA  | f1504811-8363-41e6-b43c-6245: SBS8   | SBS13 | 280    | 762   | 0.3474316 | 0         | 0         |
| Ovary-AdenoCA  | f1504811-8363-41e6-b43c-6245: SBS11  | SBS13 | 1055   | 762   | 0.3239007 | 0         | 0         |
| Ovary-AdenoCA  | e4aaca83-3ae9-47f6-a975-c144: SBS1   | SBS3  | 1361   | 9948  | 0.0791447 | 6.13E-07  | 7.68E-06  |
| Ovary-AdenoCA  | e4aaca83-3ae9-47f6-a975-c144: SBS1   | SBS13 | 1361   | 7083  | 0.0778288 | 1.97E-06  | 2.30E-05  |
| Skin-Melanoma  | 108749d2-5c62-4ef1-92df-aec69: SBS7  | SBS11 | 108670 | 955   | 0.0914727 | 2.64E-07  | 3.53E-06  |
| Panc-AdenoCA   | d91f487e-0895-44ef-aeb1-a62bc: SBS1  | SBS9  | 3013   | 603   | 0.0832633 | 0.0018856 | 0.0112972 |
| Liver-HCC      | 1dbdbb2c-c623-11e3-bf01-24c6: SBS4   | SBS12 | 482    | 5541  | 0.0790973 | 0.0077866 | 0.0372146 |
| Panc-AdenoCA   | 51458c86-0fdd-470e-b059-1ffbf: SBS1  | SBS2  | 940    | 2919  | 0.4791261 | 0         | 0         |
| Panc-AdenoCA   | 51458c86-0fdd-470e-b059-1ffbf: SBS1  | SBS3  | 940    | 548   | 0.1250039 | 4.00E-05  | 0.0003706 |
| Panc-AdenoCA   | 51458c86-0fdd-470e-b059-1ffbf: SBS1  | SBS11 | 940    | 405   | 0.0996979 | 0.0072    | 0.03479   |
| Panc-AdenoCA   | 51458c86-0fdd-470e-b059-1ffbf: SBS2  | SBS3  | 2919   | 548   | 0.3654599 | 0         | 0         |
| Panc-AdenoCA   | 51458c86-0fdd-470e-b059-1ffbf: SBS2  | SBS8  | 2919   | 532   | 0.4342781 | 0         | 0         |
| Panc-AdenoCA   | 51458c86-0fdd-470e-b059-1ffbf: SBS2  | SBS11 | 2919   | 405   | 0.4033675 | 0         | 0         |
| Panc-AdenoCA   | 51458c86-0fdd-470e-b059-1ffbf: SBS3  | SBS8  | 548    | 532   | 0.1042204 | 0.005679  | 0.0285405 |
| Breast-AdenoCa | f393bb01-6ed7-9533-e040-11ac: SBS2   | SBS3  | 1121   | 3750  | 0.298576  | 0         | 0         |
| Breast-AdenoCa | f393bb01-6ed7-9533-e040-11ac: SBS2   | SBS11 | 1121   | 367   | 0.2046295 | 1.76E-10  | 3.19E-09  |
| Breast-AdenoCa | f393bb01-6ed7-9533-e040-11ac: SBS2   | SBS13 | 1121   | 1682  | 0.0869473 | 7.66E-05  | 0.0006626 |
| Breast-AdenoCa | f393bb01-6ed7-9533-e040-11ac: SBS3   | SBS11 | 3750   | 367   | 0.1094133 | 0.0006685 | 0.0046089 |
| Breast-AdenoCa | f393bb01-6ed7-9533-e040-11ac: SBS3   | SBS13 | 3750   | 1682  | 0.2226013 | 0         | 0         |
| Breast-AdenoCa | f393bb01-6ed7-9533-e040-11ac: SBS11  | SBS13 | 367    | 1682  | 0.1243281 | 0.0001804 | 0.0014219 |
| Lymph-BNHL     | e2fa7251-507e-4d76-95a3-a228: SBS1   | SBS5  | 619    | 4996  | 0.0731024 | 0.0055534 | 0.0279992 |
| Lymph-BNHL     | e2fa7251-507e-4d76-95a3-a228: SBS1   | SBS9  | 619    | 1020  | 0.1109094 | 0.0001532 | 0.0012369 |
| Lymph-CLL      | 43d630aa-3890-401c-bf56-e3a9: SBS5   | SBS6  | 2612   | 586   | 0.1087851 | 2.41E-05  | 0.0002334 |
| Panc-AdenoCA   | 9011cf17-0783-4f9d-b355-4f0fc1: SBS1 | SBS13 | 3227   | 346   | 0.126538  | 9.01E-05  | 0.0007676 |
| Panc-AdenoCA   | 9011cf17-0783-4f9d-b355-4f0fc1: SBS8 | SBS13 | 504    | 346   | 0.1261698 | 0.0029129 | 0.016402  |
| Panc-AdenoCA   | 5255d645-d3d2-422e-8449-046c: SBS1   | SBS2  | 4434   | 3416  | 0.194145  | 0         | 0         |
| Panc-AdenoCA   | 5255d645-d3d2-422e-8449-046c: SBS1   | SBS17 | 4434   | 6163  | 0.2910648 | 0         | 0         |
| Panc-AdenoCA   | 5255d645-d3d2-422e-8449-046c: SBS2   | SBS17 | 3416   | 6163  | 0.1030322 | 0         | 0         |
| Panc-Endocrine | 0e7ac212-0469-4f17-9432-205a: SBS3   | SBS4  | 2624   | 428   | 0.1084632 | 0.0003475 | 0.0026078 |
| Panc-Endocrine | 0e7ac212-0469-4f17-9432-205a: SBS4   | SBS15 | 428    | 358   | 0.1331645 | 0.0019881 | 0.0118662 |
| Panc-AdenoCA   | f4e926fd-006e-4c85-b71c-1433c: SBS1  | SBS5  | 2514   | 1514  | 0.1370965 | 7.77E-16  | 2.29E-14  |
| Panc-AdenoCA   | f4e926fd-006e-4c85-b71c-1433c: SBS1  | SBS8  | 2514   | 1011  | 0.1964205 | 0         | 0         |
| Panc-AdenoCA   | f4e926fd-006e-4c85-b71c-1433c: SBS1  | SBS13 | 2514   | 803   | 0.3008483 | 0         | 0         |
| Panc-AdenoCA   | f4e926fd-006e-4c85-b71c-1433c: SBS5  | SBS8  | 1514   | 1011  | 0.0669962 | 0.008663  | 0.0404251 |
| Panc-AdenoCA   | f4e926fd-006e-4c85-b71c-1433c: SBS5  | SBS13 | 1514   | 803   | 0.1733526 | 4.03E-14  | 9.98E-13  |
| Panc-AdenoCA   | f4e926fd-006e-4c85-b71c-1433c: SBS8  | SBS13 | 1011   | 803   | 0.1232002 | 2.52E-06  | 2.91E-05  |
| Liver-HCC      | b55751c4-c622-11e3-bf01-24c6: SBS1   | SBS3  | 288    | 346   | 0.1404945 | 0.0040394 | 0.0214715 |
| Liver-HCC      | b55751c4-c622-11e3-bf01-24c6: SBS3   | SBS12 | 346    | 3734  | 0.0964361 | 0.0055351 | 0.027967  |
| Liver-HCC      | b55751c4-c622-11e3-bf01-24c6: SBS12  | SBS16 | 3734   | 2865  | 0.0404971 | 0.0098111 | 0.0446256 |
| Lymph-BNHL     | dc4bc4c4-2cc1-4a2e-a9f2-6130f: SBS8  | SBS17 | 1928   | 2566  | 0.1094378 | 7.06E-12  | 1.42E-10  |
| Lymph-BNHL     | dc4bc4c4-2cc1-4a2e-a9f2-6130f: SBS9  | SBS17 | 2463   | 2566  | 0.1020739 | 8.47E-12  | 1.68E-10  |
| Lymph-BNHL     | dc4bc4c4-2cc1-4a2e-a9f2-6130f: SBS10 | SBS17 | 742    | 2566  | 0.1080825 | 2.89E-06  | 3.28E-05  |
| Lymph-BNHL     | dc4bc4c4-2cc1-4a2e-a9f2-6130f: SBS16 | SBS17 | 183    | 2566  | 0.1519194 | 0.0007529 | 0.0050934 |
| Skin-Melanoma  | 39c476fd-273b-4136-874c-5335: SBS2   | SBS7  | 595    | 56781 | 0.1004793 | 1.37E-05  | 0.000138  |
| Skin-Melanoma  | 39c476fd-273b-4136-874c-5335: SBS7   | SBS11 | 56781  | 3143  | 0.0583723 | 3.07E-09  | 5.00E-08  |
| Lymph-CLL      | 5b4b2312-acb5-4329-8d46-7f93: SBS1   | SBS9  | 267    | 196   | 0.2350378 | 7.54E-06  | 7.93E-05  |
| Lymph-CLL      | 5b4b2312-acb5-4329-8d46-7f93: SBS5   | SBS9  | 2900   | 196   | 0.1843983 | 7.56E-06  | 7.94E-05  |
| Liver-HCC      | cf777ef1-765f-4828-b789-f5aa67: SBS1 | SBS16 | 252    | 6934  | 0.1439559 | 8.40E-05  | 0.0007214 |
| Panc-AdenoCA   | 1c28e44a-6e6c-44ed-b58a-e326: SBS1   | SBS2  | 3364   | 420   | 0.1248287 | 1.77E-05  | 0.0001737 |
| Panc-AdenoCA   | 9ebac79d-8b38-4469-837e-b834: SBS1   | SBS2  | 3211   | 1591  | 0.1554597 | 0         | 0         |
| Panc-AdenoCA   | 9ebac79d-8b38-4469-837e-b834: SBS1   | SBS8  | 3211   | 3893  | 0.0642225 | 9.93E-07  | 1.21E-05  |
| Panc-AdenoCA   | 9ebac79d-8b38-4469-837e-b834: SBS1   | SBS13 | 3211   | 2412  | 0.131221  | 0         | 0         |
| Panc-AdenoCA   | 9ebac79d-8b38-4469-837e-b834: SBS2   | SBS3  | 1591   | 714   | 0.119273  | 1.63E-06  | 1.93E-05  |
| Panc-AdenoCA   | 9ebac79d-8b38-4469-837e-b834: SBS2   | SBS8  | 1591   | 3893  | 0.1018956 | 1.30E-10  | 2.41E-09  |
| Panc-AdenoCA   | 9ebac79d-8b38-4469-837e-b834: SBS3   | SBS13 | 714    | 2412  | 0.0953182 | 8.98E-05  | 0.0007659 |

|                 |                              |       |       |       |       |           |           |           |
|-----------------|------------------------------|-------|-------|-------|-------|-----------|-----------|-----------|
| Panc-AdenoCA    | 9ebac79d-8b38-4469-837e-b834 | SBS8  | SBS13 | 3893  | 2412  | 0.0804859 | 8.34E-09  | 1.29E-07  |
| CNS-Medullo     | 93be2990-bceb-45fd-aca5-3358 | SBS1  | SBS5  | 1385  | 852   | 0.0791876 | 0.0026787 | 0.0152611 |
| Prost-AdenoCA   | b33b7c8f-0b0d-4009-88a7-48e9 | SBS3  | SBS8  | 743   | 645   | 0.1009484 | 0.0017575 | 0.0106935 |
| Liver-HCC       | 5769ae11-5f1b-483f-b228-7584 | SBS3  | SBS16 | 1398  | 465   | 0.0979371 | 0.0024772 | 0.0142948 |
| Liver-HCC       | 5769ae11-5f1b-483f-b228-7584 | SBS4  | SBS16 | 1339  | 465   | 0.1015105 | 0.001629  | 0.0099892 |
| Liver-HCC       | 5769ae11-5f1b-483f-b228-7584 | SBS6  | SBS16 | 570   | 465   | 0.1360498 | 0.0001527 | 0.0012365 |
| Liver-HCC       | 5769ae11-5f1b-483f-b228-7584 | SBS11 | SBS16 | 714   | 465   | 0.1135538 | 0.0014031 | 0.008793  |
| Prost-AdenoCA   | 0bfe2ac9-0afd-c248-e050-11ac | SBS1  | SBS10 | 884   | 562   | 0.090695  | 0.0070196 | 0.0340759 |
| Eso-AdenoCa     | 9749a9a5-cb7f-4038-a5f9-5e2d | SBS1  | SBS9  | 8651  | 2364  | 0.116608  | 0         | 0         |
| Liver-HCC       | 9aac83e4-c622-11e3-bf01-24c6 | SBS4  | SBS5  | 3073  | 3545  | 0.0603506 | 1.24E-05  | 0.0001254 |
| Liver-HCC       | 9aac83e4-c622-11e3-bf01-24c6 | SBS4  | SBS7  | 3073  | 1763  | 0.051525  | 0.0052204 | 0.0266854 |
| Liver-HCC       | 9aac83e4-c622-11e3-bf01-24c6 | SBS4  | SBS16 | 3073  | 1460  | 0.0518522 | 0.0097637 | 0.0445011 |
| Prost-AdenoCA   | f9c52187-2e82-d58a-e040-11ac | SBS1  | SBS6  | 1121  | 1003  | 0.0768222 | 0.0038679 | 0.020792  |
| Liver-HCC       | cb86fbb6-c622-11e3-bf01-24c6 | SBS12 | SBS17 | 231   | 264   | 0.2310606 | 3.87E-06  | 4.29E-05  |
| Liver-HCC       | cb86fbb6-c622-11e3-bf01-24c6 | SBS16 | SBS17 | 6789  | 264   | 0.1863543 | 4.32E-08  | 6.23E-07  |
| Panc-AdenoCA    | dc856038-f5f7-4dfc-a0a4-3e3a | SBS1  | SBS8  | 2764  | 1418  | 0.0584051 | 0.0033437 | 0.0184137 |
| Breast-AdenoCa  | fc63cab-d27a-5ebb-e040-11ac  | SBS1  | SBS3  | 436   | 8731  | 0.0931853 | 0.0014755 | 0.0091734 |
| Liver-HCC       | dd2e7b3c-c622-11e3-bf01-24c6 | SBS12 | SBS16 | 11943 | 1576  | 0.0739986 | 4.78E-07  | 6.12E-06  |
| Lymph-BNHL      | ac2c8928-33a2-4aa0-8bc1-cdfa | SBS1  | SBS9  | 938   | 5897  | 0.0577344 | 0.0090781 | 0.0420493 |
| Lymph-BNHL      | 07835447-5d7e-4828-80fd-89b0 | SBS1  | SBS5  | 838   | 5102  | 0.0735123 | 0.0008365 | 0.0055592 |
| Panc-AdenoCA    | 0972bfcf-c6c6-48cc-b820-cdfa | SBS1  | SBS5  | 4906  | 1537  | 0.1121628 | 3.25E-13  | 7.42E-12  |
| Panc-AdenoCA    | 0972bfcf-c6c6-48cc-b820-cdfa | SBS1  | SBS13 | 4906  | 1159  | 0.0583792 | 0.0033553 | 0.0184614 |
| Panc-AdenoCA    | 0972bfcf-c6c6-48cc-b820-cdfa | SBS4  | SBS5  | 143   | 1537  | 0.158446  | 0.0028067 | 0.0158892 |
| Panc-AdenoCA    | 0972bfcf-c6c6-48cc-b820-cdfa | SBS5  | SBS7  | 1537  | 625   | 0.1396955 | 5.88E-08  | 8.38E-07  |
| Panc-AdenoCA    | 0972bfcf-c6c6-48cc-b820-cdfa | SBS5  | SBS13 | 1537  | 1159  | 0.156452  | 1.79E-14  | 4.59E-13  |
| Panc-AdenoCA    | 8c233a11-3b2e-4273-bbe1-b5a5 | SBS1  | SBS8  | 1622  | 1587  | 0.0712606 | 0.0005793 | 0.0040839 |
| Panc-AdenoCA    | 1b0fe1d5-b286-4f49-ae92-94d9 | SBS1  | SBS8  | 1464  | 1229  | 0.0906786 | 3.38E-05  | 0.0003181 |
| Panc-AdenoCA    | 39c6c3b3-4683-4d11-984c-ed58 | SBS1  | SBS8  | 6610  | 781   | 0.0748497 | 0.0007982 | 0.005344  |
| Prost-AdenoCA   | dc85552c-2488-48d9-9da1-67a3 | SBS3  | SBS15 | 1474  | 134   | 0.14654   | 0.0102314 | 0.0462962 |
| Eso-AdenoCa     | 8ff9b1b6-a498-47fe-a970-ab7c | SBS9  | SBS17 | 4312  | 40897 | 0.0580873 | 7.40E-12  | 1.48E-10  |
| Prost-AdenoCA   | 39aee9fc-fa27-4b71-b9e8-43ff | SBS1  | SBS16 | 1836  | 178   | 0.1496169 | 0.0013995 | 0.0087792 |
| Prost-AdenoCA   | 39aee9fc-fa27-4b71-b9e8-43ff | SBS4  | SBS16 | 972   | 178   | 0.186896  | 5.45E-05  | 0.0004887 |
| Eso-AdenoCa     | da910f22-126e-41dc-be6b-47c8 | SBS1  | SBS13 | 13911 | 3405  | 0.130346  | 0         | 0         |
| Eso-AdenoCa     | da910f22-126e-41dc-be6b-47c8 | SBS1  | SBS17 | 13911 | 40599 | 0.071009  | 0         | 0         |
| Eso-AdenoCa     | da910f22-126e-41dc-be6b-47c8 | SBS13 | SBS17 | 3405  | 40599 | 0.0665499 | 1.64E-12  | 3.55E-11  |
| Stomach-AdenoCA | dc107863-2c7d-4b19-8afb-666c | SBS1  | SBS15 | 12923 | 30968 | 0.0424566 | 1.05E-14  | 2.77E-13  |
| Stomach-AdenoCA | dc107863-2c7d-4b19-8afb-666c | SBS6  | SBS15 | 21181 | 30968 | 0.032032  | 1.23E-11  | 2.42E-10  |
| Ovary-AdenoCA   | 941fcb56-e059-403d-aab1-0692 | SBS1  | SBS3  | 716   | 5873  | 0.0877979 | 0.0001067 | 0.0008904 |
| Ovary-AdenoCA   | 941fcb56-e059-403d-aab1-0692 | SBS1  | SBS9  | 716   | 260   | 0.1468414 | 0.0005355 | 0.0038249 |
| Eso-AdenoCa     | e91ab7da-79a6-4ea0-bc24-7aac | SBS1  | SBS14 | 8720  | 970   | 0.0581564 | 0.0054538 | 0.0276754 |
| Eso-AdenoCa     | e91ab7da-79a6-4ea0-bc24-7aac | SBS1  | SBS17 | 8720  | 19999 | 0.0525465 | 5.44E-15  | 1.47E-13  |
| Eso-AdenoCa     | e91ab7da-79a6-4ea0-bc24-7aac | SBS9  | SBS17 | 4391  | 19999 | 0.0646072 | 1.77E-13  | 4.15E-12  |
| Eso-AdenoCa     | e91ab7da-79a6-4ea0-bc24-7aac | SBS14 | SBS17 | 970   | 19999 | 0.0993595 | 2.33E-08  | 3.45E-07  |
| Prost-AdenoCA   | dcc938da-3e45-4c2f-ae0f-4781 | SBS1  | SBS5  | 434   | 2342  | 0.2128572 | 7.77E-15  | 2.07E-13  |
| Prost-AdenoCA   | dcc938da-3e45-4c2f-ae0f-4781 | SBS1  | SBS9  | 434   | 177   | 0.3688589 | 2.78E-15  | 7.77E-14  |
| Prost-AdenoCA   | dcc938da-3e45-4c2f-ae0f-4781 | SBS5  | SBS9  | 2342  | 177   | 0.1778358 | 6.03E-05  | 0.0005371 |
| Prost-AdenoCA   | a08ec059-7592-4698-bb45-25a  | SBS1  | SBS5  | 600   | 6361  | 0.2067804 | 0         | 0         |
| Prost-AdenoCA   | a08ec059-7592-4698-bb45-25a  | SBS1  | SBS8  | 600   | 391   | 0.1132353 | 0.0046185 | 0.0240801 |
| Prost-AdenoCA   | a08ec059-7592-4698-bb45-25a  | SBS5  | SBS8  | 6361  | 391   | 0.1048613 | 0.0006066 | 0.0042568 |
| Breast-AdenoCa  | fc9f6cb0-ceb9-790d-e040-11ac | SBS1  | SBS2  | 486   | 952   | 0.0995089 | 0.0034178 | 0.0187398 |
| Breast-AdenoCa  | fc9f6cb0-ceb9-790d-e040-11ac | SBS1  | SBS3  | 486   | 6686  | 0.0944003 | 0.0006225 | 0.0043491 |
| Breast-AdenoCa  | fc9f6cb0-ceb9-790d-e040-11ac | SBS1  | SBS13 | 486   | 1146  | 0.1243186 | 5.24E-05  | 0.000473  |
| Breast-AdenoCa  | fc9f6cb0-ceb9-790d-e040-11ac | SBS2  | SBS3  | 952   | 6686  | 0.1619884 | 0         | 0         |
| Breast-AdenoCa  | fc9f6cb0-ceb9-790d-e040-11ac | SBS2  | SBS12 | 952   | 134   | 0.158049  | 0.0056543 | 0.0284396 |
| Breast-AdenoCa  | fc9f6cb0-ceb9-790d-e040-11ac | SBS3  | SBS13 | 6686  | 1146  | 0.1908888 | 0         | 0         |
| Breast-AdenoCa  | fc9f6cb0-ceb9-790d-e040-11ac | SBS12 | SBS13 | 134   | 1146  | 0.1990701 | 0.0001484 | 0.0012079 |
| Panc-AdenoCA    | bbdd7393-024b-4073-b5bc-ef7a | SBS1  | SBS3  | 893   | 13465 | 0.1420819 | 4.11E-15  | 1.12E-13  |
| Panc-AdenoCA    | bbdd7393-024b-4073-b5bc-ef7a | SBS1  | SBS7  | 893   | 1675  | 0.1061176 | 4.02E-06  | 4.42E-05  |
| Panc-AdenoCA    | bbdd7393-024b-4073-b5bc-ef7a | SBS1  | SBS13 | 893   | 2210  | 0.0746566 | 0.0016673 | 0.010214  |
| Panc-AdenoCA    | bbdd7393-024b-4073-b5bc-ef7a | SBS3  | SBS7  | 13465 | 1675  | 0.0474823 | 0.0024198 | 0.0140677 |
| Panc-AdenoCA    | bbdd7393-024b-4073-b5bc-ef7a | SBS3  | SBS13 | 13465 | 2210  | 0.0895361 | 1.21E-13  | 2.88E-12  |
| Eso-AdenoCa     | 8e48aa43-6cd1-4aef-83ce-2451 | SBS8  | SBS17 | 5459  | 23841 | 0.0704541 | 0         | 0         |
| Panc-Endocrine  | 4b5d9d8c-ff95-45f4-9287-2804 | SBS1  | SBS12 | 219   | 358   | 0.1406979 | 0.0092186 | 0.0425738 |
| Liver-HCC       | 17de5b12-c623-11e3-bf01-24c6 | SBS3  | SBS8  | 1410  | 4431  | 0.0787272 | 3.49E-06  | 3.90E-05  |

|               |                                |       |       |       |      |           |           |           |
|---------------|--------------------------------|-------|-------|-------|------|-----------|-----------|-----------|
| Liver-HCC     | 17de5b12-c623-11e3-bf01-24c6f  | SBS3  | SBS12 | 1410  | 4476 | 0.1410587 | 0         | 0         |
| Liver-HCC     | 17de5b12-c623-11e3-bf01-24c6f  | SBS8  | SBS12 | 4431  | 4476 | 0.0662232 | 6.59E-09  | 1.03E-07  |
| Eso-AdenoCa   | b02b4bba-6e66-44fb-a48f-38c3c  | SBS1  | SBS17 | 11739 | 3339 | 0.0949959 | 0         | 0         |
| Eso-AdenoCa   | b02b4bba-6e66-44fb-a48f-38c3c  | SBS6  | SBS17 | 2016  | 3339 | 0.0838668 | 4.18E-08  | 6.07E-07  |
| Eso-AdenoCa   | b02b4bba-6e66-44fb-a48f-38c3c  | SBS10 | SBS17 | 573   | 3339 | 0.1021389 | 7.40E-05  | 0.0006425 |
| Ovary-AdenoCA | 01df36af-3617-40fc-9892-f54ce4 | SBS1  | SBS2  | 1988  | 530  | 0.0837705 | 0.0056297 | 0.0283382 |
| Ovary-AdenoCA | 01df36af-3617-40fc-9892-f54ce4 | SBS1  | SBS5  | 1988  | 2176 | 0.0522834 | 0.0068295 | 0.0332818 |
| Lymph-BNHL    | 02917220-6a7a-46a1-8656-907e   | SBS9  | SBS15 | 6076  | 1917 | 0.0644584 | 1.10E-05  | 0.0001124 |
| Lymph-BNHL    | 05616329-e7ba-4efd-87b1-d79c   | SBS6  | SBS16 | 2199  | 5042 | 0.0453527 | 0.0036766 | 0.0199662 |
| Lymph-BNHL    | 05616329-e7ba-4efd-87b1-d79c   | SBS6  | SBS17 | 2199  | 947  | 0.0712122 | 0.0024286 | 0.0140926 |
| Prost-AdenoCA | 0cb4356c-b5d6-4541-b048-ff6d4  | SBS1  | SBS7  | 767   | 688  | 0.100213  | 0.0013722 | 0.0086428 |
| Prost-AdenoCA | 0cb4356c-b5d6-4541-b048-ff6d4  | SBS1  | SBS8  | 767   | 1126 | 0.0769543 | 0.0090011 | 0.0418132 |
| Eso-AdenoCa   | 0ef92ff8-829f-425a-91d8-c594bf | SBS1  | SBS17 | 7741  | 5884 | 0.0400796 | 4.33E-05  | 0.0003975 |

**Supplementary Table 6. Kataegis events and mutation signatures.** A total of 7482 kataegic events identified in nonhypermuted genomes are listed. MaFTool-based output are available for individual kataegic events (genomic coordinates and average intermediate size). The number of mutations in terms of six mutation spectra are available. Significance of enrichment was estimated by Fisher's exact test across mutation signatures.

| Tumor type     | ICGC ref ID                          | Chr | Start     | End       | Mutations | Size (bp) | Six mutation spectra |        |        |        |        |        |
|----------------|--------------------------------------|-----|-----------|-----------|-----------|-----------|----------------------|--------|--------|--------|--------|--------|
|                |                                      |     |           |           |           |           | C-to-A               | C-to-G | C-to-T | T-to-C | T-to-G | T-to-A |
| Ovary-AdenoCA  | 0009b464-b376-4fbc-8a56-da538269a02f | 6   | 152489270 | 152489836 | 6         | 566       | 2                    | 3      | 1      | NA     | NA     | NA     |
| Ovary-AdenoCA  | 0009b464-b376-4fbc-8a56-da538269a02f | 6   | 154665662 | 154666756 | 10        | 1094      | 1                    | 4      | 5      | NA     | NA     | NA     |
| Ovary-AdenoCA  | 0009b464-b376-4fbc-8a56-da538269a02f | 7   | 86703542  | 86706397  | 17        | 2855      | 3                    | 4      | 10     | NA     | NA     | NA     |
| Ovary-AdenoCA  | 0009b464-b376-4fbc-8a56-da538269a02f | 7   | 87247570  | 87248197  | 9         | 627       | 2                    | 1      | 6      | NA     | NA     | NA     |
| Ovary-AdenoCA  | 0009b464-b376-4fbc-8a56-da538269a02f | 8   | 68622138  | 68628057  | 8         | 5919      | 3                    | 2      | 3      | NA     | NA     | NA     |
| Ovary-AdenoCA  | 0009b464-b376-4fbc-8a56-da538269a02f | 8   | 95198600  | 95203600  | 8         | 5000      | 1                    | 1      | 6      | NA     | NA     | NA     |
| Ovary-AdenoCA  | 0009b464-b376-4fbc-8a56-da538269a02f | 8   | 126314418 | 126324739 | 14        | 10321     | 2                    | NA     | 11     | 1      | NA     | NA     |
| Ovary-AdenoCA  | 0009b464-b376-4fbc-8a56-da538269a02f | 19  | 9492623   | 9493131   | 6         | 508       | NA                   | 3      | 3      | NA     | NA     | NA     |
| Ovary-AdenoCA  | 0009b464-b376-4fbc-8a56-da538269a02f | 20  | 40393279  | 40395622  | 8         | 2343      | 1                    | 2      | 5      | NA     | NA     | NA     |
| Ovary-AdenoCA  | 0009b464-b376-4fbc-8a56-da538269a02f | 20  | 40644670  | 40646723  | 7         | 2053      | NA                   | 3      | 4      | NA     | NA     | NA     |
| Ovary-AdenoCA  | 0009b464-b376-4fbc-8a56-da538269a02f | 20  | 42672605  | 42677990  | 9         | 5385      | 2                    | 4      | 3      | NA     | NA     | NA     |
| Ovary-AdenoCA  | 0009b464-b376-4fbc-8a56-da538269a02f | 20  | 50115928  | 50123941  | 13        | 8013      | 2                    | 4      | 7      | NA     | NA     | NA     |
| Ovary-AdenoCA  | 0009b464-b376-4fbc-8a56-da538269a02f | 20  | 60699024  | 60702525  | 9         | 3501      | 2                    | 5      | 2      | NA     | NA     | NA     |
| Kidney-RCC     | 005794f1-5a87-45b5-9811-83ddf6924568 | 3   | 78322918  | 78323308  | 8         | 390       | 3                    | 2      | 3      | NA     | NA     | NA     |
| Kidney-RCC     | 005794f1-5a87-45b5-9811-83ddf6924568 | 3   | 79377488  | 79380507  | 9         | 3019      | 2                    | 5      | 2      | NA     | NA     | NA     |
| Kidney-RCC     | 005794f1-5a87-45b5-9811-83ddf6924568 | 3   | 83601421  | 83604610  | 10        | 3189      | 4                    | 3      | 3      | NA     | NA     | NA     |
| Lymph-BNHL     | 00b9d0e6-69dc-4345-bffd-ce32880c8eef | 2   | 89157943  | 89165713  | 32        | 7770      | 2                    | 7      | 8      | 9      | 3      | 3      |
| Lymph-BNHL     | 00b9d0e6-69dc-4345-bffd-ce32880c8eef | 8   | 128748722 | 128751971 | 13        | 3249      | NA                   | 3      | 8      | 2      | NA     | NA     |
| Lymph-BNHL     | 00b9d0e6-69dc-4345-bffd-ce32880c8eef | 14  | 106324422 | 106330300 | 76        | 5878      | 2                    | 20     | 27     | 14     | 5      | 8      |
| Lymph-BNHL     | 00b9d0e6-69dc-4345-bffd-ce32880c8eef | 14  | 107083392 | 107084387 | 12        | 995       | NA                   | 1      | 7      | 3      | 1      | NA     |
| Liver-HCC      | 00c27940-c623-11e3-bf01-24c6515278c0 | 10  | 49741959  | 49743806  | 6         | 1847      | 1                    | NA     | 5      | NA     | NA     | NA     |
| Kidney-RCC     | 00db1b95-8ca3-4cc4-bb46-6b8c8019a7c7 | 8   | 114711968 | 114713243 | 7         | 1275      | NA                   | NA     | 6      | NA     | 1      | NA     |
| Kidney-RCC     | 00db1b95-8ca3-4cc4-bb46-6b8c8019a7c7 | 10  | 9670842   | 9672753   | 6         | 1911      | NA                   | 6      | NA     | NA     | NA     | NA     |
| Kidney-RCC     | 00db1b95-8ca3-4cc4-bb46-6b8c8019a7c7 | 10  | 25601481  | 25607855  | 14        | 6374      | 7                    | 3      | 4      | NA     | NA     | NA     |
| Kidney-RCC     | 00db1b95-8ca3-4cc4-bb46-6b8c8019a7c7 | 10  | 32190748  | 32200493  | 24        | 9745      | 6                    | 9      | 8      | NA     | 1      | NA     |
| Uterus-AdenoCA | 00db4dc2-3ec7-4ff9-9233-d69c8c8a607f | 4   | 45680606  | 45681275  | 8         | 669       | 2                    | 2      | 4      | NA     | NA     | NA     |
| Uterus-AdenoCA | 00db4dc2-3ec7-4ff9-9233-d69c8c8a607f | 16  | 68384859  | 68386849  | 16        | 1990      | 4                    | 6      | 6      | NA     | NA     | NA     |
| Uterus-AdenoCA | 00db4dc2-3ec7-4ff9-9233-d69c8c8a607f | 17  | 19720021  | 19721089  | 7         | 1068      | 2                    | 3      | 2      | NA     | NA     | NA     |
| Uterus-AdenoCA | 00db4dc2-3ec7-4ff9-9233-d69c8c8a607f | 19  | 41642722  | 41646606  | 9         | 3884      | 1                    | 3      | 3      | NA     | NA     | 2      |
| Breast-AdenoCa | 01658141-8398-4585-9f0f-8355dd9b0604 | 1   | 16259336  | 16263369  | 11        | 4033      | 1                    | 5      | 5      | NA     | NA     | NA     |
| Breast-AdenoCa | 01658141-8398-4585-9f0f-8355dd9b0604 | 1   | 41880948  | 41884811  | 9         | 3863      | NA                   | 5      | 4      | NA     | NA     | NA     |
| Breast-AdenoCa | 01658141-8398-4585-9f0f-8355dd9b0604 | 1   | 174835785 | 174836692 | 7         | 907       | 1                    | NA     | 6      | NA     | NA     | NA     |
| Breast-AdenoCa | 01658141-8398-4585-9f0f-8355dd9b0604 | 2   | 62731333  | 62735782  | 8         | 4449      | NA                   | 7      | 1      | NA     | NA     | NA     |
| Breast-AdenoCa | 01658141-8398-4585-9f0f-8355dd9b0604 | 2   | 65174550  | 65176816  | 7         | 2266      | NA                   | 1      | 6      | NA     | NA     | NA     |
| Breast-AdenoCa | 01658141-8398-4585-9f0f-8355dd9b0604 | 2   | 128775791 | 128778480 | 7         | 2689      | NA                   | 3      | 4      | NA     | NA     | NA     |
| Breast-AdenoCa | 01658141-8398-4585-9f0f-8355dd9b0604 | 2   | 242532542 | 242537171 | 13        | 4629      | 1                    | 5      | 7      | NA     | NA     | NA     |
| Breast-AdenoCa | 01658141-8398-4585-9f0f-8355dd9b0604 | 3   | 112944035 | 112945519 | 8         | 1484      | NA                   | 2      | 6      | NA     | NA     | NA     |
| Breast-AdenoCa | 01658141-8398-4585-9f0f-8355dd9b0604 | 3   | 192157595 | 192163308 | 11        | 5713      | NA                   | 4      | 7      | NA     | NA     | NA     |
| Breast-AdenoCa | 01658141-8398-4585-9f0f-8355dd9b0604 | 3   | 192168780 | 192172814 | 9         | 4034      | 1                    | 6      | 1      | NA     | 1      | NA     |
| Breast-AdenoCa | 01658141-8398-4585-9f0f-8355dd9b0604 | 4   | 169677113 | 169682344 | 9         | 5231      | NA                   | 5      | 3      | NA     | 1      | NA     |
| Breast-AdenoCa | 01658141-8398-4585-9f0f-8355dd9b0604 | 5   | 71008218  | 71012224  | 12        | 4006      | NA                   | 5      | 7      | NA     | NA     | NA     |
| Breast-AdenoCa | 01658141-8398-4585-9f0f-8355dd9b0604 | 6   | 44361443  | 44367776  | 15        | 6333      | 3                    | 7      | 5      | NA     | NA     | NA     |
| Breast-AdenoCa | 01658141-8398-4585-9f0f-8355dd9b0604 | 6   | 44378143  | 44453598  | 95        | 75455     | 13                   | 17     | 65     | NA     | NA     | NA     |
| Breast-AdenoCa | 01658141-8398-4585-9f0f-8355dd9b0604 | 6   | 44619410  | 44628077  | 10        | 8667      | 3                    | 4      | 3      | NA     | NA     | NA     |
| Breast-AdenoCa | 01658141-8398-4585-9f0f-8355dd9b0604 | 6   | 44629412  | 44634546  | 7         | 5134      | NA                   | 2      | 4      | NA     | NA     | 1      |
| Breast-AdenoCa | 01658141-8398-4585-9f0f-8355dd9b0604 | 6   | 71808641  | 71809870  | 11        | 1229      | 2                    | 8      | 1      | NA     | NA     | NA     |
| Breast-AdenoCa | 01658141-8398-4585-9f0f-8355dd9b0604 | 6   | 151906218 | 151912189 | 8         | 5971      | NA                   | 3      | 5      | NA     | NA     | NA     |
| Breast-AdenoCa | 01658141-8398-4585-9f0f-8355dd9b0604 | 7   | 2040759   | 2046714   | 7         | 5955      | NA                   | 1      | 6      | NA     | NA     | NA     |
| Breast-AdenoCa | 01658141-8398-4585-9f0f-8355dd9b0604 | 8   | 129124851 | 129127643 | 6         | 2792      | 1                    | 1      | 4      | NA     | NA     | NA     |
| Breast-AdenoCa | 01658141-8398-4585-9f0f-8355dd9b0604 | 9   | 127212934 | 127217554 | 8         | 4620      | 1                    | 6      | 1      | NA     | NA     | NA     |
| Breast-AdenoCa | 01658141-8398-4585-9f0f-8355dd9b0604 | 10  | 83877093  | 83879807  | 8         | 2714      | 1                    | 4      | 3      | NA     | NA     | NA     |

|                |                                      |    |           |           |    |       |    |    |    |    |    |    |
|----------------|--------------------------------------|----|-----------|-----------|----|-------|----|----|----|----|----|----|
| Breast-AdenoCa | 01658141-8398-4585-9f0f-8355dd9b0604 | 11 | 64937301  | 64939235  | 7  | 1934  | NA | 4  | 3  | NA | NA | NA |
| Breast-AdenoCa | 01658141-8398-4585-9f0f-8355dd9b0604 | 12 | 9249429   | 9272490   | 31 | 23061 | 2  | 10 | 19 | NA | NA | NA |
| Breast-AdenoCa | 01658141-8398-4585-9f0f-8355dd9b0604 | 12 | 9282496   | 9298670   | 23 | 16174 | 1  | 3  | 17 | NA | NA | 2  |
| Breast-AdenoCa | 01658141-8398-4585-9f0f-8355dd9b0604 | 12 | 33900621  | 33903588  | 11 | 2967  | 1  | 3  | 7  | NA | NA | NA |
| Breast-AdenoCa | 01658141-8398-4585-9f0f-8355dd9b0604 | 12 | 34012709  | 34015324  | 7  | 2615  | 1  | 5  | 1  | NA | NA | NA |
| Breast-AdenoCa | 01658141-8398-4585-9f0f-8355dd9b0604 | 14 | 34282153  | 34282331  | 6  | 178   | NA | 3  | 3  | NA | NA | NA |
| Breast-AdenoCa | 01658141-8398-4585-9f0f-8355dd9b0604 | 14 | 51730750  | 51731888  | 12 | 1138  | 4  | 3  | 5  | NA | NA | NA |
| Breast-AdenoCa | 01658141-8398-4585-9f0f-8355dd9b0604 | 14 | 55517809  | 55519868  | 7  | 2059  | 1  | 5  | 1  | NA | NA | NA |
| Breast-AdenoCa | 01658141-8398-4585-9f0f-8355dd9b0604 | 17 | 20934109  | 20938625  | 6  | 4516  | 3  | 2  | 1  | NA | NA | NA |
| Breast-AdenoCa | 01658141-8398-4585-9f0f-8355dd9b0604 | 17 | 64983584  | 64987556  | 8  | 3972  | NA | 3  | 5  | NA | NA | NA |
| Breast-AdenoCa | 01658141-8398-4585-9f0f-8355dd9b0604 | 19 | 49428778  | 49432870  | 6  | 4092  | NA | 2  | 4  | NA | NA | NA |
| Breast-AdenoCa | 01658141-8398-4585-9f0f-8355dd9b0604 | 22 | 38493315  | 38498842  | 7  | 5527  | 1  | 2  | 3  | NA | NA | 1  |
| Breast-AdenoCa | 01658141-8398-4585-9f0f-8355dd9b0604 | 22 | 38503191  | 38512084  | 10 | 8893  | NA | 3  | 7  | NA | NA | NA |
| Breast-AdenoCa | 01658141-8398-4585-9f0f-8355dd9b0604 | 22 | 38588073  | 38590606  | 7  | 2533  | 1  | 1  | 5  | NA | NA | NA |
| Breast-AdenoCa | 01658141-8398-4585-9f0f-8355dd9b0604 | X  | 68691208  | 68693179  | 11 | 1971  | NA | 5  | 5  | 1  | NA | NA |
| Panc-Endocrine | 01c8e465-2b4e-4519-bdef-c3ac06b43eeb | 2  | 148978804 | 148981913 | 6  | 3109  | NA | 2  | NA | 3  | NA | 1  |
| Liver-HCC      | 01dc6872-c623-11e3-bf01-24c6515278c0 | 3  | 110361112 | 110362154 | 8  | 1042  | NA | 5  | 3  | NA | NA | NA |
| Liver-HCC      | 01dc6872-c623-11e3-bf01-24c6515278c0 | 18 | 24627940  | 24628704  | 10 | 764   | NA | 4  | 3  | 1  | 2  | NA |
| Ovary-AdenoCA  | 01df36af-3617-40fc-9892-f54ce433cf71 | 12 | 47326945  | 47328112  | 7  | 1167  | NA | 3  | 4  | NA | NA | NA |
| Ovary-AdenoCA  | 01df36af-3617-40fc-9892-f54ce433cf71 | 19 | 34062845  | 34063872  | 8  | 1027  | NA | 4  | 4  | NA | NA | NA |
| Lung-AdenoCA   | 020fab36-c7de-4933-b2bf-dc7b019a1326 | 4  | 48359941  | 48360051  | 6  | 110   | NA | 4  | 2  | NA | NA | NA |
| Lung-AdenoCA   | 020fab36-c7de-4933-b2bf-dc7b019a1326 | 7  | 25190313  | 25194418  | 12 | 4105  | NA | 1  | 11 | NA | NA | NA |
| Lung-AdenoCA   | 020fab36-c7de-4933-b2bf-dc7b019a1326 | 8  | 64624458  | 64625906  | 8  | 1448  | 1  | 6  | 1  | NA | NA | NA |
| Lung-AdenoCA   | 020fab36-c7de-4933-b2bf-dc7b019a1326 | 8  | 67101066  | 67108021  | 9  | 6955  | 1  | 1  | 7  | NA | NA | NA |
| Lung-AdenoCA   | 020fab36-c7de-4933-b2bf-dc7b019a1326 | 8  | 100017742 | 100020427 | 12 | 2685  | NA | 8  | 4  | NA | NA | NA |
| Lung-AdenoCA   | 020fab36-c7de-4933-b2bf-dc7b019a1326 | 8  | 100960854 | 100962220 | 14 | 1366  | NA | NA | 9  | 2  | 2  | 1  |
| Lung-AdenoCA   | 020fab36-c7de-4933-b2bf-dc7b019a1326 | 8  | 118700611 | 118708880 | 12 | 8269  | 2  | 4  | 6  | NA | NA | NA |
| Lung-AdenoCA   | 020fab36-c7de-4933-b2bf-dc7b019a1326 | 16 | 49268361  | 49273693  | 9  | 5332  | NA | 3  | 6  | NA | NA | NA |
| Lung-AdenoCA   | 020fab36-c7de-4933-b2bf-dc7b019a1326 | 16 | 49327513  | 49330221  | 11 | 2708  | NA | 1  | 10 | NA | NA | NA |
| Lung-AdenoCA   | 020fab36-c7de-4933-b2bf-dc7b019a1326 | 16 | 57952471  | 57960460  | 15 | 7989  | 2  | 1  | 12 | NA | NA | NA |
| Lung-AdenoCA   | 020fab36-c7de-4933-b2bf-dc7b019a1326 | 16 | 62155780  | 62157535  | 8  | 1755  | NA | 1  | 7  | NA | NA | NA |
| Lung-AdenoCA   | 020fab36-c7de-4933-b2bf-dc7b019a1326 | 16 | 62164806  | 62167919  | 20 | 3113  | NA | 1  | 19 | NA | NA | NA |
| Lung-AdenoCA   | 020fab36-c7de-4933-b2bf-dc7b019a1326 | 17 | 58074967  | 58076299  | 8  | 1332  | NA | NA | 1  | 2  | 4  | 1  |
| Lung-AdenoCA   | 020fab36-c7de-4933-b2bf-dc7b019a1326 | 22 | 45283801  | 45284658  | 8  | 857   | NA | NA | 8  | NA | NA | NA |
| Lymph-BNHL     | 02917220-6a7a-46a1-8656-907e96bef88e | 2  | 109503584 | 109503677 | 7  | 93    | NA | NA | NA | 4  | NA | 3  |
| Lymph-BNHL     | 02917220-6a7a-46a1-8656-907e96bef88e | 3  | 27422936  | 27427358  | 6  | 4422  | NA | NA | 1  | 1  | NA | 4  |
| Lymph-BNHL     | 02917220-6a7a-46a1-8656-907e96bef88e | 3  | 39893952  | 39899157  | 8  | 5205  | NA | NA | 2  | 3  | 2  | 1  |
| Lymph-BNHL     | 02917220-6a7a-46a1-8656-907e96bef88e | 3  | 60356594  | 60359493  | 7  | 2899  | NA | 1  | NA | NA | 2  | 4  |
| Lymph-BNHL     | 02917220-6a7a-46a1-8656-907e96bef88e | 3  | 60510982  | 60518899  | 9  | 7917  | NA | 1  | 2  | 1  | 1  | 4  |
| Lymph-BNHL     | 02917220-6a7a-46a1-8656-907e96bef88e | 3  | 60636379  | 60640315  | 7  | 3936  | 1  | 1  | NA | 1  | 2  | 2  |
| Lymph-BNHL     | 02917220-6a7a-46a1-8656-907e96bef88e | 3  | 60657154  | 60664070  | 8  | 6916  | 2  | NA | 1  | 2  | 1  | 2  |
| Lymph-BNHL     | 02917220-6a7a-46a1-8656-907e96bef88e | 3  | 60665717  | 60670686  | 7  | 4969  | 2  | 1  | 2  | 1  | 1  | NA |
| Lymph-BNHL     | 02917220-6a7a-46a1-8656-907e96bef88e | 3  | 60673374  | 60692771  | 27 | 19397 | 4  | NA | 4  | 7  | 7  | 5  |
| Lymph-BNHL     | 02917220-6a7a-46a1-8656-907e96bef88e | 3  | 60887622  | 60893018  | 7  | 5396  | NA | NA | NA | 1  | 2  | 4  |
| Lymph-BNHL     | 02917220-6a7a-46a1-8656-907e96bef88e | 3  | 76444957  | 76460038  | 40 | 15081 | NA | 1  | NA | 15 | 9  | 15 |
| Lymph-BNHL     | 02917220-6a7a-46a1-8656-907e96bef88e | 3  | 149638427 | 149638714 | 7  | 287   | NA | NA | NA | 5  | 1  | 1  |
| Lymph-BNHL     | 02917220-6a7a-46a1-8656-907e96bef88e | 4  | 14194885  | 14196904  | 6  | 2019  | NA | 1  | 1  | 4  | NA | NA |
| Lymph-BNHL     | 02917220-6a7a-46a1-8656-907e96bef88e | 4  | 136538498 | 136541864 | 9  | 3366  | NA | 1  | NA | 3  | 4  | 1  |
| Lymph-BNHL     | 02917220-6a7a-46a1-8656-907e96bef88e | 7  | 52184197  | 52188706  | 6  | 4509  | NA | NA | 2  | 2  | NA | 2  |
| Lymph-BNHL     | 02917220-6a7a-46a1-8656-907e96bef88e | 9  | 11221917  | 11226114  | 7  | 4197  | NA | NA | NA | 1  | 2  | 4  |
| Lymph-BNHL     | 02917220-6a7a-46a1-8656-907e96bef88e | 10 | 58176246  | 58176789  | 6  | 543   | NA | NA | NA | 3  | 2  | 1  |
| Lymph-BNHL     | 02917220-6a7a-46a1-8656-907e96bef88e | 10 | 84747682  | 84749029  | 7  | 1347  | 1  | NA | NA | 2  | 3  | 1  |
| Lymph-BNHL     | 02917220-6a7a-46a1-8656-907e96bef88e | 13 | 35979390  | 35982170  | 9  | 2780  | NA | NA | NA | 2  | 4  | 3  |
| Lymph-BNHL     | 02917220-6a7a-46a1-8656-907e96bef88e | 14 | 38408661  | 38411626  | 12 | 2965  | 1  | 1  | NA | 1  | 6  | 3  |
| Lymph-BNHL     | 02917220-6a7a-46a1-8656-907e96bef88e | 14 | 106326040 | 106330379 | 41 | 4339  | 2  | 11 | 10 | 10 | 5  | 3  |
| Lymph-BNHL     | 02917220-6a7a-46a1-8656-907e96bef88e | 14 | 107170096 | 107179611 | 21 | 9515  | NA | 6  | 4  | 5  | 5  | 1  |
| Lymph-BNHL     | 02917220-6a7a-46a1-8656-907e96bef88e | 15 | 55820017  | 55821998  | 7  | 1981  | NA | NA | 1  | 5  | 1  | NA |
| Lymph-BNHL     | 02917220-6a7a-46a1-8656-907e96bef88e | 18 | 60984802  | 60988554  | 42 | 3752  | 1  | 8  | 5  | 13 | 7  | 8  |
| Lymph-BNHL     | 02917220-6a7a-46a1-8656-907e96bef88e | 22 | 22516598  | 22517365  | 12 | 767   | NA | NA | 2  | 3  | 4  | 3  |
| Lymph-BNHL     | 02917220-6a7a-46a1-8656-907e96bef88e | 22 | 23039606  | 23040615  | 8  | 1009  | 2  | 1  | NA | 2  | 2  | 1  |

|                  |                                      |    |           |           |    |       |    |    |    |    |    |    |
|------------------|--------------------------------------|----|-----------|-----------|----|-------|----|----|----|----|----|----|
| Head-SCC         | 02c6a893-49c5-49d1-8eb1-195021e70d52 | 10 | 89669909  | 89674620  | 7  | 4711  | 2  | 2  | 2  | NA | 1  | NA |
| Head-SCC         | 02c6a893-49c5-49d1-8eb1-195021e70d52 | 12 | 1550635   | 1556505   | 14 | 5870  | 2  | 4  | 8  | NA | NA | NA |
| Panc-AdenoCA     | 02c97e2b-914e-4afc-bf50-78f0cfbfa67b | 7  | 46045837  | 46059972  | 34 | 14135 | 3  | 13 | 17 | NA | NA | 1  |
| Panc-AdenoCA     | 02e5c36f-5bec-45e2-a048-875653b85ca1 | 6  | 63101335  | 63102511  | 12 | 1176  | 1  | 5  | 5  | NA | NA | 1  |
| Panc-AdenoCA     | 02e5c36f-5bec-45e2-a048-875653b85ca1 | 8  | 38349037  | 38350478  | 6  | 1441  | NA | 2  | 4  | NA | NA | NA |
| Panc-AdenoCA     | 02e5c36f-5bec-45e2-a048-875653b85ca1 | 14 | 61147479  | 61147599  | 6  | 120   | NA | 2  | 4  | NA | NA | NA |
| Panc-AdenoCA     | 02e5c36f-5bec-45e2-a048-875653b85ca1 | 18 | 22520919  | 22525681  | 6  | 4762  | NA | 2  | 4  | NA | NA | NA |
| Panc-AdenoCA     | 02e5c36f-5bec-45e2-a048-875653b85ca1 | 18 | 24596245  | 24602197  | 41 | 5952  | 7  | 12 | 22 | NA | NA | NA |
| Panc-AdenoCA     | 02e5c36f-5bec-45e2-a048-875653b85ca1 | 18 | 25666546  | 25676048  | 13 | 9502  | 1  | 7  | 5  | NA | NA | NA |
| Panc-AdenoCA     | 02e5c36f-5bec-45e2-a048-875653b85ca1 | 18 | 26232812  | 26234350  | 10 | 1538  | 2  | 2  | 6  | NA | NA | NA |
| Liver-HCC        | 030695f6-c623-11e3-bf01-24c6515278c0 | 7  | 2833577   | 2835845   | 10 | 2268  | NA | 9  | 1  | NA | NA | NA |
| Liver-HCC        | 030695f6-c623-11e3-bf01-24c6515278c0 | 8  | 35446715  | 35449391  | 9  | 2676  | 1  | 5  | 3  | NA | NA | NA |
| Lymph-BNHL       | 03ad38a6-0902-4aaa-84a3-91ea88fa9883 | 14 | 106210978 | 106213823 | 6  | 2845  | 1  | 1  | 4  | NA | NA | NA |
| Lymph-BNHL       | 03ad38a6-0902-4aaa-84a3-91ea88fa9883 | 14 | 106325625 | 106330111 | 75 | 4486  | 2  | 15 | 27 | 19 | 9  | 3  |
| Lymph-BNHL       | 03ad38a6-0902-4aaa-84a3-91ea88fa9883 | 18 | 60983692  | 60988293  | 17 | 4601  | NA | 4  | 5  | 4  | 2  | 2  |
| Lymph-BNHL       | 03ad38a6-0902-4aaa-84a3-91ea88fa9883 | 22 | 22749951  | 22750340  | 6  | 389   | NA | 2  | NA | 2  | 1  | 1  |
| Lymph-BNHL       | 03ad38a6-0902-4aaa-84a3-91ea88fa9883 | 22 | 22758914  | 22768645  | 14 | 9731  | 1  | 2  | 4  | 4  | 2  | 1  |
| Lymph-BNHL       | 03ad38a6-0902-4aaa-84a3-91ea88fa9883 | 22 | 23223227  | 23231759  | 28 | 8532  | 1  | 3  | 7  | 7  | 5  | 5  |
| Panc-AdenoCA     | 03c3c692-8a86-4843-85ae-e045f0fa6f88 | 1  | 32000484  | 32003537  | 11 | 3053  | NA | NA | 1  | 10 | NA | NA |
| Panc-AdenoCA     | 03c3c692-8a86-4843-85ae-e045f0fa6f88 | 1  | 217752959 | 217753591 | 10 | 632   | 1  | 3  | 6  | NA | NA | NA |
| Panc-AdenoCA     | 03c3c692-8a86-4843-85ae-e045f0fa6f88 | 2  | 78916046  | 78924194  | 11 | 8148  | 1  | 4  | 6  | NA | NA | NA |
| Panc-AdenoCA     | 03c3c692-8a86-4843-85ae-e045f0fa6f88 | 3  | 134287405 | 134311503 | 28 | 24098 | 7  | 7  | 13 | NA | NA | 1  |
| Panc-AdenoCA     | 03c3c692-8a86-4843-85ae-e045f0fa6f88 | 4  | 184457776 | 184460536 | 9  | 2760  | 1  | 5  | 2  | NA | NA | 1  |
| Panc-AdenoCA     | 03c3c692-8a86-4843-85ae-e045f0fa6f88 | 4  | 187359796 | 187365414 | 7  | 5618  | NA | 2  | 5  | NA | NA | NA |
| Panc-AdenoCA     | 03c3c692-8a86-4843-85ae-e045f0fa6f88 | 4  | 189770187 | 189772938 | 13 | 2751  | 3  | 6  | 4  | NA | NA | NA |
| Panc-AdenoCA     | 03c3c692-8a86-4843-85ae-e045f0fa6f88 | 5  | 178680806 | 178690668 | 12 | 9862  | 1  | 2  | 9  | NA | NA | NA |
| Panc-AdenoCA     | 03c3c692-8a86-4843-85ae-e045f0fa6f88 | 6  | 13363875  | 13364459  | 7  | 584   | 2  | 2  | 3  | NA | NA | NA |
| Panc-AdenoCA     | 03c3c692-8a86-4843-85ae-e045f0fa6f88 | 6  | 31561194  | 31599640  | 41 | 38446 | 11 | 9  | 21 | NA | NA | NA |
| Panc-AdenoCA     | 03c3c692-8a86-4843-85ae-e045f0fa6f88 | 9  | 27716355  | 27717415  | 8  | 1060  | NA | 2  | 6  | NA | NA | NA |
| Panc-AdenoCA     | 03c3c692-8a86-4843-85ae-e045f0fa6f88 | 15 | 87409500  | 87415192  | 7  | 5692  | NA | NA | 6  | 1  | NA | NA |
| Panc-AdenoCA     | 03c3c692-8a86-4843-85ae-e045f0fa6f88 | 15 | 87418917  | 87433166  | 16 | 14249 | 7  | 3  | 6  | NA | NA | NA |
| Liver-HCC        | 03c88506-d72e-4a44-a34e-a7f0564f1799 | 9  | 21007271  | 21008235  | 6  | 964   | NA | 3  | 2  | NA | 1  | NA |
| Liver-HCC        | 03c88506-d72e-4a44-a34e-a7f0564f1799 | 9  | 21097751  | 21100293  | 18 | 2542  | 2  | 7  | 9  | NA | NA | NA |
| Bone-Leiomyo     | 03ced0ce-186a-4349-8d98-572c2bc90382 | 3  | 141084599 | 141087365 | 8  | 2766  | NA | 2  | 6  | NA | NA | NA |
| Bone-Leiomyo     | 03ced0ce-186a-4349-8d98-572c2bc90382 | 3  | 145511316 | 145512622 | 9  | 1306  | 1  | 3  | 5  | NA | NA | NA |
| Bone-Leiomyo     | 03ced0ce-186a-4349-8d98-572c2bc90382 | 3  | 172473785 | 172481110 | 28 | 7325  | 2  | 19 | 6  | NA | NA | 1  |
| Bone-Leiomyo     | 03ced0ce-186a-4349-8d98-572c2bc90382 | 10 | 113458726 | 113467917 | 13 | 9191  | NA | NA | 13 | NA | NA | NA |
| Bone-Leiomyo     | 03ced0ce-186a-4349-8d98-572c2bc90382 | 16 | 78675497  | 78681191  | 19 | 5694  | 6  | 11 | 2  | NA | NA | NA |
| Bone-Leiomyo     | 03ced0ce-186a-4349-8d98-572c2bc90382 | X  | 22843801  | 22844117  | 6  | 316   | 3  | 3  | NA | NA | NA | NA |
| ColoRect-AdenoCA | 03cff38d-7e29-4409-a508-749bddb1b3df | 4  | 67820677  | 67821986  | 9  | 1309  | NA | 7  | 2  | NA | NA | NA |
| ColoRect-AdenoCA | 03cff38d-7e29-4409-a508-749bddb1b3df | 5  | 39153316  | 39153644  | 6  | 328   | 2  | 2  | 2  | NA | NA | NA |
| ColoRect-AdenoCA | 03cff38d-7e29-4409-a508-749bddb1b3df | 10 | 28165507  | 28168205  | 7  | 2698  | NA | 3  | 3  | 1  | NA | NA |
| ColoRect-AdenoCA | 03cff38d-7e29-4409-a508-749bddb1b3df | 16 | 69461018  | 69462594  | 10 | 1576  | 1  | 3  | 6  | NA | NA | NA |
| CNS-GBM          | 04339769-517c-448d-a7ca-951f83608c60 | 12 | 58496920  | 58497284  | 6  | 364   | NA | NA | 6  | NA | NA | NA |
| CNS-GBM          | 04339769-517c-448d-a7ca-951f83608c60 | X  | 80821276  | 80825050  | 6  | 3774  | NA | 3  | 3  | NA | NA | NA |
| Breast-AdenoCa   | 0448206f-3ade-4087-b1a9-4fb2d14e1367 | 2  | 117253143 | 117257980 | 6  | 4837  | 2  | 3  | 1  | NA | NA | NA |
| Breast-AdenoCa   | 0448206f-3ade-4087-b1a9-4fb2d14e1367 | 2  | 117261083 | 117270327 | 18 | 9244  | 2  | 13 | 2  | NA | 1  | NA |
| Breast-AdenoCa   | 0448206f-3ade-4087-b1a9-4fb2d14e1367 | 2  | 134116676 | 134117603 | 7  | 927   | 2  | 4  | 1  | NA | NA | NA |
| Breast-AdenoCa   | 0448206f-3ade-4087-b1a9-4fb2d14e1367 | 3  | 160952012 | 160957592 | 13 | 5580  | 5  | 5  | 2  | NA | NA | 1  |
| Breast-AdenoCa   | 0448206f-3ade-4087-b1a9-4fb2d14e1367 | 6  | 115573852 | 115581389 | 11 | 7537  | 3  | 7  | 1  | NA | NA | NA |
| Breast-AdenoCa   | 0448206f-3ade-4087-b1a9-4fb2d14e1367 | 11 | 3678889   | 3680391   | 7  | 1502  | 2  | 4  | 1  | NA | NA | NA |
| Breast-AdenoCa   | 0448206f-3ade-4087-b1a9-4fb2d14e1367 | 11 | 41387450  | 41391202  | 8  | 3752  | 1  | 6  | 1  | NA | NA | NA |
| Breast-AdenoCa   | 0448206f-3ade-4087-b1a9-4fb2d14e1367 | 11 | 42914614  | 42917438  | 10 | 2824  | 2  | 7  | 1  | NA | NA | NA |
| Breast-AdenoCa   | 0448206f-3ade-4087-b1a9-4fb2d14e1367 | 13 | 19511446  | 19517074  | 10 | 5628  | NA | 5  | 5  | NA | NA | NA |
| Breast-AdenoCa   | 0448206f-3ade-4087-b1a9-4fb2d14e1367 | 16 | 51865840  | 51866894  | 7  | 1054  | 1  | 2  | 4  | NA | NA | NA |
| Breast-AdenoCa   | 0448206f-3ade-4087-b1a9-4fb2d14e1367 | 20 | 4074223   | 4078598   | 11 | 4375  | 3  | 2  | 6  | NA | NA | NA |
| Breast-AdenoCa   | 0448206f-3ade-4087-b1a9-4fb2d14e1367 | 21 | 48003171  | 48005079  | 7  | 1908  | 2  | 4  | 1  | NA | NA | NA |
| Panc-AdenoCA     | 046d7386-95c8-4501-9e55-c85bec272a7a | 1  | 4091340   | 4092487   | 19 | 1147  | 5  | 9  | 5  | NA | NA | NA |
| Panc-AdenoCA     | 046d7386-95c8-4501-9e55-c85bec272a7a | 1  | 5782556   | 5784975   | 9  | 2419  | NA | 3  | 6  | NA | NA | NA |
| Panc-AdenoCA     | 046d7386-95c8-4501-9e55-c85bec272a7a | 4  | 29301483  | 29301935  | 10 | 452   | 2  | 5  | 3  | NA | NA | NA |

|               |                                      |    |           |           |     |       |    |    |    |    |    |    |
|---------------|--------------------------------------|----|-----------|-----------|-----|-------|----|----|----|----|----|----|
| Panc-AdenoCA  | 046d7386-95c8-4501-9e55-c85bec272a7a | 9  | 18786650  | 18787252  | 7   | 602   | NA | 2  | 5  | NA | NA | NA |
| Panc-AdenoCA  | 046d7386-95c8-4501-9e55-c85bec272a7a | 9  | 21930139  | 21930486  | 7   | 347   | NA | 2  | 5  | NA | NA | NA |
| Panc-AdenoCA  | 046d7386-95c8-4501-9e55-c85bec272a7a | 11 | 119409261 | 119413179 | 19  | 3918  | 3  | 4  | 12 | NA | NA | NA |
| Panc-AdenoCA  | 046d7386-95c8-4501-9e55-c85bec272a7a | X  | 77579618  | 77580230  | 7   | 612   | NA | 2  | 5  | NA | NA | NA |
| Panc-AdenoCA  | 046d7386-95c8-4501-9e55-c85bec272a7a | X  | 144302192 | 144304283 | 19  | 2091  | 2  | 4  | 13 | NA | NA | NA |
| Cervix-SCC    | 047f9e4d-86b5-4943-ae5-68199bf29e8c  | 2  | 29105823  | 29108799  | 7   | 2976  | NA | 5  | 1  | 1  | NA | NA |
| Cervix-SCC    | 047f9e4d-86b5-4943-ae5-68199bf29e8c  | 6  | 3837899   | 3843496   | 8   | 5597  | 1  | 1  | 6  | NA | NA | NA |
| Cervix-SCC    | 047f9e4d-86b5-4943-ae5-68199bf29e8c  | 6  | 7407302   | 7410453   | 12  | 3151  | 1  | 3  | 8  | NA | NA | NA |
| Cervix-SCC    | 047f9e4d-86b5-4943-ae5-68199bf29e8c  | 9  | 134563771 | 134567287 | 7   | 3516  | 1  | 3  | 3  | NA | NA | NA |
| Cervix-SCC    | 047f9e4d-86b5-4943-ae5-68199bf29e8c  | 12 | 86381814  | 86385676  | 12  | 3862  | 2  | 1  | 9  | NA | NA | NA |
| Cervix-SCC    | 047f9e4d-86b5-4943-ae5-68199bf29e8c  | 16 | 80281696  | 80282642  | 6   | 946   | 2  | 2  | 2  | NA | NA | NA |
| Cervix-SCC    | 047f9e4d-86b5-4943-ae5-68199bf29e8c  | 17 | 26775069  | 26776227  | 7   | 1158  | 1  | 6  | NA | NA | NA | NA |
| Cervix-SCC    | 047f9e4d-86b5-4943-ae5-68199bf29e8c  | 17 | 73873476  | 73875438  | 8   | 1962  | 1  | 1  | 6  | NA | NA | NA |
| Cervix-SCC    | 047f9e4d-86b5-4943-ae5-68199bf29e8c  | 19 | 4520460   | 4522427   | 6   | 1967  | 2  | NA | 4  | NA | NA | NA |
| Panc-AdenoCA  | 05070acd-3ec1-44bb-9c32-26d3a483a72a | 1  | 236325198 | 236327886 | 11  | 2688  | NA | 1  | 9  | NA | 1  | NA |
| Panc-AdenoCA  | 05070acd-3ec1-44bb-9c32-26d3a483a72a | 6  | 20822608  | 20823326  | 7   | 718   | 1  | 2  | 4  | NA | NA | NA |
| Panc-AdenoCA  | 05070acd-3ec1-44bb-9c32-26d3a483a72a | 6  | 56436436  | 56437619  | 13  | 1183  | 1  | 5  | 7  | NA | NA | NA |
| Panc-AdenoCA  | 05070acd-3ec1-44bb-9c32-26d3a483a72a | 11 | 118524488 | 118524905 | 14  | 417   | 4  | 1  | 9  | NA | NA | NA |
| Panc-AdenoCA  | 05070acd-3ec1-44bb-9c32-26d3a483a72a | 18 | 61179557  | 61180188  | 12  | 631   | NA | 1  | 11 | NA | NA | NA |
| Panc-AdenoCA  | 05070acd-3ec1-44bb-9c32-26d3a483a72a | 18 | 69489532  | 69491249  | 9   | 1717  | 2  | 4  | 3  | NA | NA | NA |
| Prost-AdenoCA | 052015bc-8c24-467c-8ff7-9e0dc4ad39fd | 6  | 17166712  | 17168489  | 17  | 1777  | NA | 12 | 5  | NA | NA | NA |
| Ovary-AdenoCA | 052665d1-ab75-4f40-be5a-b88154c8beed | 20 | 57974934  | 57982887  | 16  | 7953  | 4  | 3  | 9  | NA | NA | NA |
| Lymph-BNHL    | 05616329-e7ba-4efd-87b1-d79cd0f7af3d | 1  | 203274816 | 203276041 | 8   | 1225  | 1  | 1  | 4  | NA | 1  | 1  |
| Lymph-BNHL    | 05616329-e7ba-4efd-87b1-d79cd0f7af3d | 3  | 60604546  | 60608516  | 6   | 3970  | 3  | NA | 2  | NA | NA | 1  |
| Lymph-BNHL    | 05616329-e7ba-4efd-87b1-d79cd0f7af3d | 3  | 187460756 | 187462859 | 9   | 2103  | NA | 4  | 1  | 3  | NA | 1  |
| Lymph-BNHL    | 05616329-e7ba-4efd-87b1-d79cd0f7af3d | 7  | 53530231  | 53532254  | 7   | 2023  | NA | NA | NA | 4  | 1  | 2  |
| Lymph-BNHL    | 05616329-e7ba-4efd-87b1-d79cd0f7af3d | 8  | 94595118  | 94595428  | 8   | 310   | 1  | NA | 1  | 4  | 1  | 1  |
| Lymph-BNHL    | 05616329-e7ba-4efd-87b1-d79cd0f7af3d | 14 | 106325228 | 106356363 | 74  | 31135 | 3  | 17 | 23 | 18 | 7  | 6  |
| Lymph-BNHL    | 05616329-e7ba-4efd-87b1-d79cd0f7af3d | 14 | 106829678 | 106830504 | 10  | 826   | 1  | 2  | 4  | NA | 2  | 1  |
| Lymph-BNHL    | 05616329-e7ba-4efd-87b1-d79cd0f7af3d | 18 | 4674052   | 4675396   | 6   | 1344  | NA | NA | 1  | 2  | 1  | 2  |
| Lymph-BNHL    | 05616329-e7ba-4efd-87b1-d79cd0f7af3d | 22 | 23227993  | 23235606  | 18  | 7613  | NA | 2  | 4  | 2  | 6  | 4  |
| Lymph-BNHL    | 05616329-e7ba-4efd-87b1-d79cd0f7af3d | X  | 123605894 | 123606364 | 6   | 470   | NA | NA | NA | 3  | 1  | 2  |
| Liver-HCC     | 062e96d4-c623-11e3-bf01-24c6515278c0 | 1  | 47959748  | 47962873  | 12  | 3125  | 2  | 3  | 7  | NA | NA | NA |
| Liver-HCC     | 062e96d4-c623-11e3-bf01-24c6515278c0 | 7  | 146021802 | 146026651 | 6   | 4849  | 2  | 1  | 1  | 2  | NA | NA |
| Lymph-BNHL    | 068f4f69-d2fe-4f25-912e-ca7d4623efb6 | 2  | 89156057  | 89161049  | 114 | 4992  | 7  | 11 | 27 | 37 | 15 | 17 |
| Lymph-BNHL    | 068f4f69-d2fe-4f25-912e-ca7d4623efb6 | 3  | 187462327 | 187463059 | 12  | 732   | NA | 3  | 2  | 3  | 3  | 1  |
| Lymph-BNHL    | 068f4f69-d2fe-4f25-912e-ca7d4623efb6 | 4  | 35346478  | 35350504  | 16  | 4026  | NA | NA | NA | 10 | 4  | 2  |
| Lymph-BNHL    | 068f4f69-d2fe-4f25-912e-ca7d4623efb6 | 7  | 104769904 | 104771442 | 6   | 1538  | NA | 4  | 2  | NA | NA | NA |
| Lymph-BNHL    | 068f4f69-d2fe-4f25-912e-ca7d4623efb6 | 14 | 106208624 | 106213556 | 6   | 4932  | NA | 1  | 4  | 1  | NA | NA |
| Lymph-BNHL    | 068f4f69-d2fe-4f25-912e-ca7d4623efb6 | 14 | 106238741 | 106240410 | 7   | 1669  | 1  | 1  | 4  | 1  | NA | NA |
| Lymph-BNHL    | 068f4f69-d2fe-4f25-912e-ca7d4623efb6 | 14 | 106322259 | 106330122 | 83  | 7863  | 4  | 9  | 25 | 21 | 12 | 12 |
| Lymph-BNHL    | 068f4f69-d2fe-4f25-912e-ca7d4623efb6 | 14 | 106586780 | 106591076 | 9   | 4296  | NA | 1  | 1  | 3  | 1  | 3  |
| Lymph-BNHL    | 068f4f69-d2fe-4f25-912e-ca7d4623efb6 | 14 | 106994079 | 106994796 | 9   | 717   | NA | 1  | 2  | 5  | 1  | NA |
| Lymph-BNHL    | 068f4f69-d2fe-4f25-912e-ca7d4623efb6 | 18 | 42363592  | 42367367  | 6   | 3775  | NA | NA | NA | 2  | 3  | 1  |
| Lymph-BNHL    | 068f4f69-d2fe-4f25-912e-ca7d4623efb6 | 18 | 60984530  | 60986968  | 20  | 2438  | NA | 3  | 8  | 4  | 2  | 3  |
| Lymph-BNHL    | 068f4f69-d2fe-4f25-912e-ca7d4623efb6 | 22 | 23223104  | 23231951  | 20  | 8847  | 1  | 2  | 12 | 2  | 1  | 2  |
| Cervix-SCC    | 06dad93a-4b67-49b3-8fa5-f2546e22bae7 | 1  | 16937261  | 16941618  | 6   | 4357  | NA | 5  | 1  | NA | NA | NA |
| Cervix-SCC    | 06dad93a-4b67-49b3-8fa5-f2546e22bae7 | 1  | 63880162  | 63883194  | 11  | 3032  | NA | 7  | 4  | NA | NA | NA |
| Cervix-SCC    | 06dad93a-4b67-49b3-8fa5-f2546e22bae7 | 2  | 201324105 | 201326984 | 8   | 2879  | NA | 5  | 3  | NA | NA | NA |
| Cervix-SCC    | 06dad93a-4b67-49b3-8fa5-f2546e22bae7 | 3  | 22398451  | 22405818  | 9   | 7367  | 2  | 2  | 5  | NA | NA | NA |
| Cervix-SCC    | 06dad93a-4b67-49b3-8fa5-f2546e22bae7 | 15 | 41558266  | 41561296  | 14  | 3030  | 1  | 4  | 9  | NA | NA | NA |
| Cervix-SCC    | 06dad93a-4b67-49b3-8fa5-f2546e22bae7 | 16 | 131001    | 132530    | 10  | 1529  | NA | 3  | 6  | NA | NA | 1  |
| Cervix-SCC    | 06dad93a-4b67-49b3-8fa5-f2546e22bae7 | 16 | 1748420   | 1761170   | 34  | 12750 | 6  | 10 | 17 | NA | 1  | NA |
| Cervix-SCC    | 06dad93a-4b67-49b3-8fa5-f2546e22bae7 | 16 | 15704411  | 15707502  | 8   | 3091  | NA | 4  | 4  | NA | NA | NA |
| Cervix-SCC    | 06dad93a-4b67-49b3-8fa5-f2546e22bae7 | 20 | 40250451  | 40252386  | 10  | 1935  | 1  | 6  | 3  | NA | NA | NA |
| Cervix-SCC    | 06dad93a-4b67-49b3-8fa5-f2546e22bae7 | 21 | 23621784  | 23626495  | 8   | 4711  | NA | 4  | 4  | NA | NA | NA |
| Cervix-SCC    | 06dad93a-4b67-49b3-8fa5-f2546e22bae7 | 21 | 26732279  | 26738856  | 13  | 6577  | 2  | 5  | 6  | NA | NA | NA |
| Cervix-SCC    | 06dad93a-4b67-49b3-8fa5-f2546e22bae7 | X  | 17806071  | 17811622  | 8   | 5551  | NA | 3  | 5  | NA | NA | NA |
| Prost-AdenoCA | 07531318-87e8-4db8-aa61-9b93597d063b | 5  | 98258784  | 98261060  | 7   | 2276  | NA | 4  | 3  | NA | NA | NA |
| Prost-AdenoCA | 07531318-87e8-4db8-aa61-9b93597d063b | 5  | 101743354 | 101746395 | 10  | 3041  | NA | 4  | 4  | 1  | 1  | NA |



|              |                                      |    |           |           |     |       |    |    |    |    |    |    |
|--------------|--------------------------------------|----|-----------|-----------|-----|-------|----|----|----|----|----|----|
| Bone-Leiomyo | 075fc96d-6742-4ef3-9369-482592ad3a2f | 3  | 979749    | 980891    | 7   | 1142  | NA | 5  | 2  | NA | NA | NA |
| Bone-Leiomyo | 075fc96d-6742-4ef3-9369-482592ad3a2f | 3  | 18086167  | 18088654  | 8   | 2487  | NA | NA | NA | 1  | 6  | 1  |
| Bone-Leiomyo | 075fc96d-6742-4ef3-9369-482592ad3a2f | 4  | 149819204 | 149824504 | 10  | 5300  | 1  | 7  | 2  | NA | NA | NA |
| Bone-Leiomyo | 075fc96d-6742-4ef3-9369-482592ad3a2f | 5  | 2447581   | 2452617   | 21  | 5036  | NA | 9  | 12 | NA | NA | NA |
| Bone-Leiomyo | 075fc96d-6742-4ef3-9369-482592ad3a2f | 6  | 30749346  | 30749657  | 6   | 311   | 1  | 4  | 1  | NA | NA | NA |
| Bone-Leiomyo | 075fc96d-6742-4ef3-9369-482592ad3a2f | 6  | 119462708 | 119471810 | 13  | 9102  | 1  | 7  | 5  | NA | NA | NA |
| Bone-Leiomyo | 075fc96d-6742-4ef3-9369-482592ad3a2f | 6  | 119514250 | 119514953 | 11  | 703   | NA | NA | 11 | NA | NA | NA |
| Bone-Leiomyo | 075fc96d-6742-4ef3-9369-482592ad3a2f | 7  | 132552266 | 132554044 | 7   | 1778  | 1  | 4  | 1  | NA | 1  | NA |
| Bone-Leiomyo | 075fc96d-6742-4ef3-9369-482592ad3a2f | 7  | 132899324 | 132901528 | 16  | 2204  | 2  | 1  | 13 | NA | NA | NA |
| Bone-Leiomyo | 075fc96d-6742-4ef3-9369-482592ad3a2f | 7  | 132935486 | 132938050 | 10  | 2564  | 1  | 1  | 8  | NA | NA | NA |
| Bone-Leiomyo | 075fc96d-6742-4ef3-9369-482592ad3a2f | 7  | 132949281 | 132953548 | 7   | 4267  | NA | NA | 7  | NA | NA | NA |
| Bone-Leiomyo | 075fc96d-6742-4ef3-9369-482592ad3a2f | 8  | 43159267  | 43160047  | 8   | 780   | NA | 5  | 3  | NA | NA | NA |
| Bone-Leiomyo | 075fc96d-6742-4ef3-9369-482592ad3a2f | 9  | 115041344 | 115042439 | 6   | 1095  | 1  | 4  | 1  | NA | NA | NA |
| Bone-Leiomyo | 075fc96d-6742-4ef3-9369-482592ad3a2f | 9  | 127387765 | 127393565 | 9   | 5800  | 1  | 7  | 1  | NA | NA | NA |
| Bone-Leiomyo | 075fc96d-6742-4ef3-9369-482592ad3a2f | 9  | 132150387 | 132154585 | 10  | 4198  | NA | 2  | 8  | NA | NA | NA |
| Bone-Leiomyo | 075fc96d-6742-4ef3-9369-482592ad3a2f | 12 | 49869530  | 49870216  | 15  | 686   | NA | NA | 15 | NA | NA | NA |
| Bone-Leiomyo | 075fc96d-6742-4ef3-9369-482592ad3a2f | 12 | 49942364  | 49949615  | 33  | 7251  | NA | NA | 33 | NA | NA | NA |
| Bone-Leiomyo | 075fc96d-6742-4ef3-9369-482592ad3a2f | 12 | 49991930  | 49992740  | 12  | 810   | NA | NA | 12 | NA | NA | NA |
| Bone-Leiomyo | 075fc96d-6742-4ef3-9369-482592ad3a2f | 12 | 50042925  | 50046948  | 8   | 4023  | 1  | 4  | 3  | NA | NA | NA |
| Bone-Leiomyo | 075fc96d-6742-4ef3-9369-482592ad3a2f | 12 | 58158510  | 58163784  | 16  | 5274  | NA | 2  | 14 | NA | NA | NA |
| Bone-Leiomyo | 075fc96d-6742-4ef3-9369-482592ad3a2f | 12 | 69226699  | 69231851  | 9   | 5152  | NA | 2  | 7  | NA | NA | NA |
| Bone-Leiomyo | 075fc96d-6742-4ef3-9369-482592ad3a2f | 12 | 72399709  | 72408659  | 14  | 8950  | 2  | 5  | 7  | NA | NA | NA |
| Bone-Leiomyo | 075fc96d-6742-4ef3-9369-482592ad3a2f | 12 | 73179607  | 73185784  | 11  | 6177  | 1  | 9  | 1  | NA | NA | NA |
| Bone-Leiomyo | 075fc96d-6742-4ef3-9369-482592ad3a2f | 12 | 73328014  | 73333169  | 18  | 5155  | 6  | 5  | 7  | NA | NA | NA |
| Bone-Leiomyo | 075fc96d-6742-4ef3-9369-482592ad3a2f | 12 | 73399272  | 73404813  | 18  | 5541  | 4  | 1  | 13 | NA | NA | NA |
| Bone-Leiomyo | 075fc96d-6742-4ef3-9369-482592ad3a2f | 12 | 79354797  | 79355496  | 7   | 699   | NA | 4  | 3  | NA | NA | NA |
| Bone-Leiomyo | 075fc96d-6742-4ef3-9369-482592ad3a2f | 12 | 82137482  | 82138132  | 8   | 650   | NA | NA | 8  | NA | NA | NA |
| Bone-Leiomyo | 075fc96d-6742-4ef3-9369-482592ad3a2f | 12 | 85197920  | 85200246  | 13  | 2326  | 1  | 5  | 7  | NA | NA | NA |
| Bone-Leiomyo | 075fc96d-6742-4ef3-9369-482592ad3a2f | 12 | 85309173  | 85313654  | 9   | 4481  | 1  | 1  | 7  | NA | NA | NA |
| Bone-Leiomyo | 075fc96d-6742-4ef3-9369-482592ad3a2f | 12 | 85604994  | 85607371  | 8   | 2377  | 2  | 1  | 5  | NA | NA | NA |
| Bone-Leiomyo | 075fc96d-6742-4ef3-9369-482592ad3a2f | 12 | 87066396  | 87068294  | 16  | 1898  | 1  | 5  | 10 | NA | NA | NA |
| Bone-Leiomyo | 075fc96d-6742-4ef3-9369-482592ad3a2f | 12 | 87179279  | 87180156  | 7   | 877   | NA | NA | NA | NA | 6  | 1  |
| Bone-Leiomyo | 075fc96d-6742-4ef3-9369-482592ad3a2f | 12 | 96637863  | 96643803  | 7   | 5940  | NA | 1  | 6  | NA | NA | NA |
| Bone-Leiomyo | 075fc96d-6742-4ef3-9369-482592ad3a2f | 12 | 96707981  | 96708613  | 7   | 632   | 3  | 3  | 1  | NA | NA | NA |
| Bone-Leiomyo | 075fc96d-6742-4ef3-9369-482592ad3a2f | 12 | 102419810 | 102421537 | 10  | 1727  | 3  | 4  | 3  | NA | NA | NA |
| Bone-Leiomyo | 075fc96d-6742-4ef3-9369-482592ad3a2f | 12 | 102458953 | 102464795 | 16  | 5842  | NA | 7  | 6  | NA | 3  | NA |
| Bone-Leiomyo | 075fc96d-6742-4ef3-9369-482592ad3a2f | 12 | 102523022 | 102524371 | 11  | 1349  | 4  | 3  | 4  | NA | NA | NA |
| Bone-Leiomyo | 075fc96d-6742-4ef3-9369-482592ad3a2f | 12 | 105689225 | 105689706 | 8   | 481   | 1  | 2  | 5  | NA | NA | NA |
| Bone-Leiomyo | 075fc96d-6742-4ef3-9369-482592ad3a2f | 12 | 105981604 | 105983018 | 19  | 1414  | 3  | 11 | 5  | NA | NA | NA |
| Bone-Leiomyo | 075fc96d-6742-4ef3-9369-482592ad3a2f | 12 | 106003163 | 106007003 | 11  | 3840  | NA | 2  | 9  | NA | NA | NA |
| Bone-Leiomyo | 075fc96d-6742-4ef3-9369-482592ad3a2f | 12 | 119609386 | 119609936 | 11  | 550   | 1  | 4  | 6  | NA | NA | NA |
| Bone-Leiomyo | 075fc96d-6742-4ef3-9369-482592ad3a2f | 12 | 121746944 | 121747544 | 9   | 600   | NA | NA | 9  | NA | NA | NA |
| Bone-Leiomyo | 075fc96d-6742-4ef3-9369-482592ad3a2f | 20 | 49874009  | 49878735  | 8   | 4726  | 1  | 3  | 4  | NA | NA | NA |
| Lymph-BNHL   | 07835447-5d7e-4828-80fd-89b063989c9a | 1  | 206285343 | 206289108 | 7   | 3765  | 1  | 2  | 4  | NA | NA | NA |
| Lymph-BNHL   | 07835447-5d7e-4828-80fd-89b063989c9a | 2  | 89157306  | 89160092  | 57  | 2786  | 3  | 7  | 17 | 16 | 6  | 8  |
| Lymph-BNHL   | 07835447-5d7e-4828-80fd-89b063989c9a | 2  | 89544438  | 89544855  | 14  | 417   | NA | 2  | 4  | 3  | 3  | 2  |
| Lymph-BNHL   | 07835447-5d7e-4828-80fd-89b063989c9a | 6  | 37138279  | 37140655  | 15  | 2376  | 2  | 2  | 11 | NA | NA | NA |
| Lymph-BNHL   | 07835447-5d7e-4828-80fd-89b063989c9a | 8  | 40428539  | 40429800  | 7   | 1261  | NA | 2  | NA | 2  | 3  | NA |
| Lymph-BNHL   | 07835447-5d7e-4828-80fd-89b063989c9a | 9  | 37423147  | 37426137  | 10  | 2990  | 1  | 2  | 7  | NA | NA | NA |
| Lymph-BNHL   | 07835447-5d7e-4828-80fd-89b063989c9a | 11 | 90594505  | 90599223  | 8   | 4718  | 1  | 1  | 1  | NA | 3  | 2  |
| Lymph-BNHL   | 07835447-5d7e-4828-80fd-89b063989c9a | 12 | 92538742  | 92540541  | 9   | 1799  | NA | 1  | 8  | NA | NA | NA |
| Lymph-BNHL   | 07835447-5d7e-4828-80fd-89b063989c9a | 14 | 106110395 | 106148102 | 45  | 37707 | 6  | 11 | 27 | NA | NA | 1  |
| Lymph-BNHL   | 07835447-5d7e-4828-80fd-89b063989c9a | 14 | 106173417 | 106178587 | 12  | 5170  | NA | 2  | 8  | NA | NA | 2  |
| Lymph-BNHL   | 07835447-5d7e-4828-80fd-89b063989c9a | 14 | 106208869 | 106350166 | 258 | 1E+05 | 35 | 58 | ## | 19 | 10 | 6  |
| Lymph-BNHL   | 07835447-5d7e-4828-80fd-89b063989c9a | 14 | 106518691 | 106518829 | 8   | 138   | 1  | 2  | 2  | 2  | NA | 1  |
| Lymph-BNHL   | 07835447-5d7e-4828-80fd-89b063989c9a | 22 | 23223100  | 23235372  | 61  | 12272 | 2  | 11 | 29 | 15 | 2  | 2  |
| Panc-AdenoCA | 079bc09-a075-4313-9a3e-dd67734a8c5d  | 3  | 58936230  | 58940158  | 7   | 3928  | 1  | 4  | 2  | NA | NA | NA |
| Panc-AdenoCA | 079bc09-a075-4313-9a3e-dd67734a8c5d  | 10 | 54161249  | 54162905  | 7   | 1656  | 2  | 2  | 3  | NA | NA | NA |
| Panc-AdenoCA | 079bc09-a075-4313-9a3e-dd67734a8c5d  | 20 | 22684696  | 22686077  | 14  | 1381  | 2  | 7  | 5  | NA | NA | NA |
| Cervix-SCC   | 07d20658-3db4-47e7-877b-6653626edfc  | 1  | 57868262  | 57872707  | 9   | 4445  | 1  | 5  | 3  | NA | NA | NA |

|                  |                                      |    |           |           |    |       |    |    |    |    |    |    |
|------------------|--------------------------------------|----|-----------|-----------|----|-------|----|----|----|----|----|----|
| Cervix-SCC       | 07d20658-3db4-47e7-877b-66536266edfc | 1  | 187535245 | 187536236 | 7  | 991   | 3  | 4  | NA | NA | NA | NA |
| Cervix-SCC       | 07d20658-3db4-47e7-877b-66536266edfc | 7  | 3323093   | 3324567   | 10 | 1474  | 2  | 4  | 3  | NA | NA | 1  |
| Cervix-SCC       | 07d20658-3db4-47e7-877b-66536266edfc | 7  | 14014991  | 14016295  | 7  | 1304  | 1  | 1  | 5  | NA | NA | NA |
| Cervix-SCC       | 07d20658-3db4-47e7-877b-66536266edfc | 12 | 34007088  | 34010259  | 10 | 3171  | 1  | 6  | 3  | NA | NA | NA |
| Cervix-SCC       | 07d20658-3db4-47e7-877b-66536266edfc | 15 | 67859412  | 67861675  | 28 | 2263  | 5  | 11 | 12 | NA | NA | NA |
| Kidney-ChRCC     | 07e0e938-f61f-477a-92a2-5b7e74b78943 | 3  | 188391464 | 188393675 | 6  | 2211  | 1  | NA | 3  | 1  | 1  | NA |
| Prost-AdenoCA    | 07f16397-71bb-4594-ad4d-caa7d2baeabd | 4  | 171214661 | 171215204 | 9  | 543   | NA | NA | NA | 3  | 5  | 1  |
| Prost-AdenoCA    | 07f16397-71bb-4594-ad4d-caa7d2baeabd | 5  | 2399325   | 2400377   | 7  | 1052  | NA | 3  | 4  | NA | NA | NA |
| Prost-AdenoCA    | 07f16397-71bb-4594-ad4d-caa7d2baeabd | 5  | 3049216   | 3052284   | 7  | 3068  | NA | 4  | 3  | NA | NA | NA |
| ColoRect-AdenoCA | 080ecc31-756a-4a1b-a51e-d632ac8219f7 | 2  | 82332612  | 82336631  | 12 | 4019  | 4  | 3  | 4  | NA | 1  | NA |
| ColoRect-AdenoCA | 080ecc31-756a-4a1b-a51e-d632ac8219f7 | 20 | 33047423  | 33047954  | 7  | 531   | NA | 6  | 1  | NA | NA | NA |
| Head-SCC         | 08227616-02a5-46e8-9db1-f2d1d691ab23 | 3  | 152038969 | 152042343 | 17 | 3374  | 2  | 1  | 14 | NA | NA | NA |
| Head-SCC         | 08227616-02a5-46e8-9db1-f2d1d691ab23 | 14 | 23838726  | 23839603  | 9  | 877   | 3  | 2  | 4  | NA | NA | NA |
| Head-SCC         | 08227616-02a5-46e8-9db1-f2d1d691ab23 | X  | 57167725  | 57168282  | 10 | 557   | 1  | 7  | 2  | NA | NA | NA |
| CNS-GBM          | 08ac57ec-0036-4134-a9bb-f22eaa27ab0d | 12 | 38178420  | 38178591  | 6  | 171   | NA | 3  | 3  | NA | NA | NA |
| Eso-AdenoCa      | 09497b9b-6fca-48cb-af97-161a3e434a51 | 3  | 171730258 | 171730983 | 8  | 725   | 2  | 6  | NA | NA | NA | NA |
| Eso-AdenoCa      | 09497b9b-6fca-48cb-af97-161a3e434a51 | 8  | 34653842  | 34654742  | 7  | 900   | NA | 5  | 2  | NA | NA | NA |
| Eso-AdenoCa      | 09497b9b-6fca-48cb-af97-161a3e434a51 | 12 | 21722142  | 21726331  | 9  | 4189  | 4  | 3  | 1  | NA | NA | 1  |
| Eso-AdenoCa      | 09497b9b-6fca-48cb-af97-161a3e434a51 | 12 | 43471331  | 43476984  | 13 | 5653  | 3  | 1  | 9  | NA | NA | NA |
| Ovary-AdenoCA    | 09508a0d-ebe0-4fa1-b7b2-1710814181cd | 19 | 30780642  | 30781680  | 9  | 1038  | NA | 8  | 1  | NA | NA | NA |
| Panc-AdenoCA     | 0972bfcf-c6c6-48cc-b820-cdfa6279a4f3 | 1  | 113708815 | 113711424 | 7  | 2609  | 1  | NA | 6  | NA | NA | NA |
| Panc-AdenoCA     | 0972bfcf-c6c6-48cc-b820-cdfa6279a4f3 | 3  | 26956743  | 26958619  | 6  | 1876  | 2  | 1  | 3  | NA | NA | NA |
| Panc-AdenoCA     | 0972bfcf-c6c6-48cc-b820-cdfa6279a4f3 | 3  | 169849715 | 169850214 | 11 | 499   | 4  | 6  | 1  | NA | NA | NA |
| Panc-AdenoCA     | 0972bfcf-c6c6-48cc-b820-cdfa6279a4f3 | 6  | 121350232 | 121351545 | 6  | 1313  | 2  | 1  | 2  | NA | NA | 1  |
| Panc-AdenoCA     | 0972bfcf-c6c6-48cc-b820-cdfa6279a4f3 | 7  | 31340657  | 31340915  | 7  | 258   | NA | NA | 7  | NA | NA | NA |
| Panc-AdenoCA     | 0972bfcf-c6c6-48cc-b820-cdfa6279a4f3 | 7  | 35819295  | 35819409  | 7  | 114   | 3  | NA | 4  | NA | NA | NA |
| Panc-AdenoCA     | 0972bfcf-c6c6-48cc-b820-cdfa6279a4f3 | 7  | 43851155  | 43851508  | 7  | 353   | NA | NA | 7  | NA | NA | NA |
| Panc-AdenoCA     | 0972bfcf-c6c6-48cc-b820-cdfa6279a4f3 | 7  | 69954359  | 69954821  | 7  | 462   | NA | 1  | 6  | NA | NA | NA |
| Panc-AdenoCA     | 0972bfcf-c6c6-48cc-b820-cdfa6279a4f3 | 11 | 46767606  | 46768199  | 7  | 593   | NA | 2  | 5  | NA | NA | NA |
| Panc-AdenoCA     | 0972bfcf-c6c6-48cc-b820-cdfa6279a4f3 | 11 | 82194661  | 82198545  | 17 | 3884  | NA | 7  | 9  | 1  | NA | NA |
| Panc-AdenoCA     | 0972bfcf-c6c6-48cc-b820-cdfa6279a4f3 | 11 | 123113562 | 123115283 | 7  | 1721  | NA | 3  | 4  | NA | NA | NA |
| Panc-AdenoCA     | 0972bfcf-c6c6-48cc-b820-cdfa6279a4f3 | 18 | 11336449  | 11344305  | 11 | 7856  | 2  | 3  | 6  | NA | NA | NA |
| Panc-AdenoCA     | 0972bfcf-c6c6-48cc-b820-cdfa6279a4f3 | 18 | 19958417  | 19960614  | 9  | 2197  | 3  | 4  | 2  | NA | NA | NA |
| Panc-AdenoCA     | 0972bfcf-c6c6-48cc-b820-cdfa6279a4f3 | X  | 125986599 | 125987358 | 8  | 759   | NA | NA | NA | 4  | 2  | 2  |
| Lung-AdenoCA     | 09bc8542-4ea1-4599-91b3-d606425b37e2 | 1  | 24806623  | 24808449  | 6  | 1826  | NA | 2  | 4  | NA | NA | NA |
| Lung-AdenoCA     | 09bc8542-4ea1-4599-91b3-d606425b37e2 | 1  | 222024966 | 222027113 | 7  | 2147  | 3  | 4  | NA | NA | NA | NA |
| Lung-AdenoCA     | 09bc8542-4ea1-4599-91b3-d606425b37e2 | 2  | 66809185  | 66813073  | 24 | 3888  | 5  | 15 | 4  | NA | NA | NA |
| Lung-AdenoCA     | 09bc8542-4ea1-4599-91b3-d606425b37e2 | 3  | 122565655 | 122575671 | 15 | 10016 | 5  | 5  | 5  | NA | NA | NA |
| Lung-AdenoCA     | 09bc8542-4ea1-4599-91b3-d606425b37e2 | 3  | 151066543 | 151067784 | 8  | 1241  | 4  | 2  | 2  | NA | NA | NA |
| Lung-AdenoCA     | 09bc8542-4ea1-4599-91b3-d606425b37e2 | 4  | 15736592  | 15738890  | 10 | 2298  | NA | 8  | 2  | NA | NA | NA |
| Lung-AdenoCA     | 09bc8542-4ea1-4599-91b3-d606425b37e2 | 8  | 4789723   | 4790543   | 9  | 820   | NA | 6  | 3  | NA | NA | NA |
| Lung-AdenoCA     | 09bc8542-4ea1-4599-91b3-d606425b37e2 | 12 | 66453558  | 66457042  | 16 | 3484  | 1  | 10 | 5  | NA | NA | NA |
| Lung-AdenoCA     | 09bc8542-4ea1-4599-91b3-d606425b37e2 | 16 | 79821475  | 79826083  | 15 | 4608  | 3  | 8  | 4  | NA | NA | NA |
| Panc-AdenoCA     | 09cb8bc5-13ac-44ac-9b7d-6de143373570 | 3  | 144600673 | 144603712 | 6  | 3039  | NA | NA | NA | 2  | 3  | 1  |
| Panc-AdenoCA     | 09cb8bc5-13ac-44ac-9b7d-6de143373570 | 18 | 22365904  | 22369200  | 12 | 3296  | 3  | 6  | 3  | NA | NA | NA |
| Panc-AdenoCA     | 09cb8bc5-13ac-44ac-9b7d-6de143373570 | 18 | 22465656  | 22467360  | 7  | 1704  | 1  | 6  | NA | NA | NA | NA |
| Panc-AdenoCA     | 09cb8bc5-13ac-44ac-9b7d-6de143373570 | 18 | 22634768  | 22639977  | 8  | 5209  | 1  | 3  | 4  | NA | NA | NA |
| Panc-AdenoCA     | 09cb8bc5-13ac-44ac-9b7d-6de143373570 | 18 | 23118645  | 23124378  | 8  | 5733  | NA | 3  | 5  | NA | NA | NA |
| Panc-AdenoCA     | 09cb8bc5-13ac-44ac-9b7d-6de143373570 | 18 | 24207055  | 24210389  | 7  | 3334  | 3  | 3  | 1  | NA | NA | NA |
| Panc-AdenoCA     | 09e1fe3e-bfd8-4175-ac42-0e1bf0ba5523 | 3  | 26005375  | 26006556  | 6  | 1181  | NA | 3  | 3  | NA | NA | NA |
| Panc-AdenoCA     | 09e1fe3e-bfd8-4175-ac42-0e1bf0ba5523 | 4  | 2610371   | 2614373   | 15 | 4002  | NA | 6  | 7  | 1  | NA | 1  |
| Panc-AdenoCA     | 09e1fe3e-bfd8-4175-ac42-0e1bf0ba5523 | 9  | 31719478  | 31721769  | 7  | 2291  | NA | 4  | 3  | NA | NA | NA |
| Panc-AdenoCA     | 09e1fe3e-bfd8-4175-ac42-0e1bf0ba5523 | 11 | 97415207  | 97416350  | 9  | 1143  | NA | 1  | 8  | NA | NA | NA |
| Panc-AdenoCA     | 09e1fe3e-bfd8-4175-ac42-0e1bf0ba5523 | 11 | 122131437 | 122136644 | 21 | 5207  | NA | 10 | 11 | NA | NA | NA |
| Prost-AdenoCA    | 0a6be23a-d5a0-4e95-ada2-a61b2b5d9485 | 8  | 26176112  | 26185078  | 16 | 8966  | NA | 11 | 5  | NA | NA | NA |
| Panc-AdenoCA     | 0b29c893-03bf-4131-b192-c14a2788d411 | 19 | 53780055  | 53780067  | 6  | 12    | NA | 2  | 1  | 2  | NA | 1  |
| Panc-AdenoCA     | 0b29c893-03bf-4131-b192-c14a2788d411 | X  | 142189623 | 142190918 | 9  | 1295  | 2  | 1  | 6  | NA | NA | NA |
| Lymph-CLL        | 0b6cd7df-6970-4d60-b7b5-85002a7d8781 | 13 | 89363885  | 89368662  | 10 | 4777  | NA | NA | 1  | 3  | 4  | 2  |
| Lymph-CLL        | 0b6cd7df-6970-4d60-b7b5-85002a7d8781 | 14 | 106325382 | 106372225 | 53 | 46843 | 2  | 11 | 13 | 15 | 7  | 5  |
| Lymph-CLL        | 0b6cd7df-6970-4d60-b7b5-85002a7d8781 | 14 | 107169530 | 107179032 | 15 | 9502  | NA | 3  | 4  | 4  | 1  | 3  |

|               |                                      |    |           |           |    |      |    |    |    |    |    |    |
|---------------|--------------------------------------|----|-----------|-----------|----|------|----|----|----|----|----|----|
| Lymph-CLL     | 0b6cd7df-6970-4d60-b7b5-85002a7d8781 | 22 | 23055021  | 23055595  | 19 | 574  | 4  | 3  | 6  | 2  | 3  | 1  |
| Lymph-CLL     | 0b6cd7df-6970-4d60-b7b5-85002a7d8781 | 22 | 23101421  | 23102254  | 15 | 833  | 3  | 5  | 3  | 2  | NA | 2  |
| Prost-AdenoCA | 0bfd1043-5142-3662-e050-11ac0c486501 | 7  | 113961488 | 113963382 | 8  | 1894 | 1  | 1  | 6  | NA | NA | NA |
| Prost-AdenoCA | 0bfd1043-5142-3662-e050-11ac0c486501 | 7  | 114050280 | 114052288 | 7  | 2008 | NA | NA | 7  | NA | NA | NA |
| Prost-AdenoCA | 0bfd1043-5142-3662-e050-11ac0c486501 | 8  | 56634262  | 56638657  | 20 | 4395 | 2  | 9  | 9  | NA | NA | NA |
| Prost-AdenoCA | 0bfd1043-5142-3662-e050-11ac0c486501 | 8  | 56694956  | 56695349  | 7  | 393  | 1  | 2  | 4  | NA | NA | NA |
| Prost-AdenoCA | 0bfd1043-5142-3662-e050-11ac0c486501 | 8  | 124281863 | 124284377 | 17 | 2514 | 3  | 7  | 7  | NA | NA | NA |
| Prost-AdenoCA | 0bfd1043-5142-3662-e050-11ac0c486501 | 8  | 127391614 | 127392595 | 10 | 981  | 1  | 2  | 7  | NA | NA | NA |
| Prost-AdenoCA | 0bfd1043-5142-3662-e050-11ac0c486501 | 8  | 128391806 | 128392721 | 7  | 915  | 2  | 5  | NA | NA | NA | NA |
| Prost-AdenoCA | 0bfd1043-5142-3662-e050-11ac0c486501 | 10 | 34496955  | 34498368  | 17 | 1413 | NA | 11 | 6  | NA | NA | NA |
| Prost-AdenoCA | 0bfd1043-5142-3662-e050-11ac0c486501 | 19 | 59097579  | 59098153  | 8  | 574  | 1  | 6  | 1  | NA | NA | NA |
| Prost-AdenoCA | 0bfd1043-70fb-d2dc-e050-11ac0c4860cb | 7  | 113961488 | 113963382 | 8  | 1894 | 1  | 1  | 6  | NA | NA | NA |
| Prost-AdenoCA | 0bfd1043-70fb-d2dc-e050-11ac0c4860cb | 7  | 114050280 | 114052288 | 7  | 2008 | NA | NA | 7  | NA | NA | NA |
| Prost-AdenoCA | 0bfd1043-70fb-d2dc-e050-11ac0c4860cb | 10 | 34496955  | 34498368  | 17 | 1413 | NA | 11 | 6  | NA | NA | NA |
| Prost-AdenoCA | 0bfd1043-7343-fdd0-e050-11ac0c484cab | 5  | 43503216  | 43504063  | 11 | 847  | 4  | 5  | 2  | NA | NA | NA |
| Prost-AdenoCA | 0bfd1043-7343-fdd0-e050-11ac0c484cab | 5  | 74451444  | 74458515  | 20 | 7071 | 3  | 13 | 4  | NA | NA | NA |
| Prost-AdenoCA | 0bfd1043-7343-fdd0-e050-11ac0c484cab | 5  | 165722404 | 165730376 | 12 | 7972 | NA | 8  | 4  | NA | NA | NA |
| Prost-AdenoCA | 0bfd1043-7343-fdd0-e050-11ac0c484cab | 6  | 26673526  | 26676102  | 10 | 2576 | NA | 6  | 4  | NA | NA | NA |
| Prost-AdenoCA | 0bfd1043-7343-fdd0-e050-11ac0c484cab | 6  | 26799400  | 26800079  | 8  | 679  | 1  | 5  | 2  | NA | NA | NA |
| Prost-AdenoCA | 0bfd1043-7343-fdd0-e050-11ac0c484cab | 6  | 52632975  | 52634630  | 9  | 1655 | NA | 5  | 4  | NA | NA | NA |
| Prost-AdenoCA | 0bfd1043-7343-fdd0-e050-11ac0c484cab | 6  | 142658336 | 142661263 | 9  | 2927 | NA | 5  | 4  | NA | NA | NA |
| Prost-AdenoCA | 0bfd1043-7343-fdd0-e050-11ac0c484cab | 8  | 105179323 | 105180959 | 10 | 1636 | NA | 1  | 9  | NA | NA | NA |
| Prost-AdenoCA | 0bfd1043-7343-fdd0-e050-11ac0c484cab | 8  | 107817289 | 107818977 | 9  | 1688 | 3  | 3  | 3  | NA | NA | NA |
| Prost-AdenoCA | 0bfd1043-7343-fdd0-e050-11ac0c484cab | 11 | 25654530  | 25659793  | 20 | 5263 | 2  | 12 | 6  | NA | NA | NA |
| Prost-AdenoCA | 0bfd1043-7343-fdd0-e050-11ac0c484cab | 12 | 2406503   | 2407682   | 8  | 1179 | NA | 3  | 5  | NA | NA | NA |
| Prost-AdenoCA | 0bfd1043-7343-fdd0-e050-11ac0c484cab | 12 | 25280904  | 25287088  | 14 | 6184 | NA | 7  | 7  | NA | NA | NA |
| Prost-AdenoCA | 0bfd1043-7343-fdd0-e050-11ac0c484cab | 20 | 33664883  | 33665434  | 9  | 551  | 1  | 2  | 6  | NA | NA | NA |
| Prost-AdenoCA | 0bfd1043-7343-fdd0-e050-11ac0c484cab | 20 | 33687815  | 33691649  | 14 | 3834 | 1  | 7  | 6  | NA | NA | NA |
| Prost-AdenoCA | 0bfd1043-7343-fdd0-e050-11ac0c484cab | 20 | 33702859  | 33711838  | 36 | 8979 | 2  | 17 | 17 | NA | NA | NA |
| Prost-AdenoCA | 0bfd1043-7343-fdd0-e050-11ac0c484cab | X  | 63734126  | 63734496  | 8  | 370  | 3  | 2  | 3  | NA | NA | NA |
| Prost-AdenoCA | 0bfd1043-7344-fdd0-e050-11ac0c484cab | 4  | 170945689 | 170946925 | 6  | 1236 | 2  | 1  | 3  | NA | NA | NA |
| Prost-AdenoCA | 0bfd1043-7344-fdd0-e050-11ac0c484cab | 15 | 78761484  | 78763011  | 6  | 1527 | 1  | 4  | 1  | NA | NA | NA |
| Prost-AdenoCA | 0bfd1043-7344-fdd0-e050-11ac0c484cab | X  | 44998797  | 45002395  | 7  | 3598 | 1  | 4  | 2  | NA | NA | NA |
| Prost-AdenoCA | 0bfd1043-7ebf-aaec-e050-11ac0c482f39 | 1  | 219182955 | 219186381 | 7  | 3426 | NA | 4  | 3  | NA | NA | NA |
| Prost-AdenoCA | 0bfd1043-7ebf-aaec-e050-11ac0c482f39 | 2  | 132370918 | 132372756 | 11 | 1838 | 1  | 5  | 5  | NA | NA | NA |
| Prost-AdenoCA | 0bfd1043-7ebf-aaec-e050-11ac0c482f39 | 2  | 132986596 | 132990709 | 8  | 4113 | 2  | 6  | NA | NA | NA | NA |
| Prost-AdenoCA | 0bfd1043-7ebf-aaec-e050-11ac0c482f39 | 2  | 138045866 | 138050977 | 7  | 5111 | NA | 3  | 4  | NA | NA | NA |
| Prost-AdenoCA | 0bfd1043-7ebf-aaec-e050-11ac0c482f39 | 2  | 138057584 | 138064457 | 9  | 6873 | 1  | 5  | 3  | NA | NA | NA |
| Prost-AdenoCA | 0bfd1043-7ebf-aaec-e050-11ac0c482f39 | 2  | 138489812 | 138490949 | 9  | 1137 | NA | 5  | 4  | NA | NA | NA |
| Prost-AdenoCA | 0bfd1043-7ebf-aaec-e050-11ac0c482f39 | 4  | 108530561 | 108531085 | 11 | 524  | NA | NA | 11 | NA | NA | NA |
| Prost-AdenoCA | 0bfd1043-7ebf-aaec-e050-11ac0c482f39 | 6  | 118517440 | 118526547 | 18 | 9107 | NA | 14 | 4  | NA | NA | NA |
| Prost-AdenoCA | 0bfd1043-7ebf-aaec-e050-11ac0c482f39 | 8  | 39915996  | 39917101  | 8  | 1105 | 1  | 2  | 5  | NA | NA | NA |
| Prost-AdenoCA | 0bfd1043-7ebf-aaec-e050-11ac0c482f39 | 8  | 39953854  | 39963547  | 16 | 9693 | 1  | 7  | 8  | NA | NA | NA |
| Prost-AdenoCA | 0bfd1043-7ebf-aaec-e050-11ac0c482f39 | 10 | 55166349  | 55167516  | 18 | 1167 | NA | 4  | 14 | NA | NA | NA |
| Prost-AdenoCA | 0bfd1043-7ebf-aaec-e050-11ac0c482f39 | 17 | 25558277  | 25563151  | 7  | 4874 | 1  | 1  | 4  | 1  | NA | NA |
| Prost-AdenoCA | 0bfd1043-7ebf-aaec-e050-11ac0c482f39 | X  | 72829542  | 72832540  | 6  | 2998 | 1  | 2  | 3  | NA | NA | NA |
| Prost-AdenoCA | 0bfd1043-7ebf-aaec-e050-11ac0c482f39 | X  | 73024862  | 73025076  | 7  | 214  | NA | 2  | 5  | NA | NA | NA |
| Prost-AdenoCA | 0bfd1043-7ec1-aaec-e050-11ac0c482f39 | 2  | 163184265 | 163187340 | 6  | 3075 | 1  | 2  | 3  | NA | NA | NA |
| Prost-AdenoCA | 0bfd1043-7ec1-aaec-e050-11ac0c482f39 | 2  | 180992013 | 180992486 | 7  | 473  | NA | 2  | 5  | NA | NA | NA |
| Prost-AdenoCA | 0bfd1043-7ec1-aaec-e050-11ac0c482f39 | 2  | 191475730 | 191477101 | 14 | 1371 | 7  | 5  | 1  | NA | NA | 1  |
| Prost-AdenoCA | 0bfd1043-7ec1-aaec-e050-11ac0c482f39 | 4  | 138279515 | 138279776 | 6  | 261  | 2  | 3  | 1  | NA | NA | NA |
| Prost-AdenoCA | 0bfd1043-7ec1-aaec-e050-11ac0c482f39 | 6  | 140575899 | 140577888 | 14 | 1989 | 2  | 2  | 10 | NA | NA | NA |
| Prost-AdenoCA | 0bfd1043-7ec1-aaec-e050-11ac0c482f39 | 8  | 75215998  | 75216332  | 6  | 334  | 1  | 3  | 2  | NA | NA | NA |
| Prost-AdenoCA | 0bfd1043-816e-e3e4-e050-11ac0c4860c5 | 4  | 170945689 | 170946925 | 6  | 1236 | 2  | 1  | 3  | NA | NA | NA |
| Prost-AdenoCA | 0bfd1043-816e-e3e4-e050-11ac0c4860c5 | 15 | 78761484  | 78763225  | 7  | 1741 | 1  | 4  | 1  | NA | 1  | NA |
| Prost-AdenoCA | 0bfd1043-816e-e3e4-e050-11ac0c4860c5 | X  | 44998797  | 45002395  | 7  | 3598 | 1  | 4  | 2  | NA | NA | NA |
| Prost-AdenoCA | 0bfd1043-8170-e3e4-e050-11ac0c4860c5 | 1  | 174416077 | 174423563 | 18 | 7486 | 3  | 6  | 8  | NA | 1  | NA |
| Prost-AdenoCA | 0bfd1043-8170-e3e4-e050-11ac0c4860c5 | 4  | 52873723  | 52879886  | 15 | 6163 | 1  | 8  | 5  | NA | 1  | NA |
| Prost-AdenoCA | 0bfd1043-8170-e3e4-e050-11ac0c4860c5 | 5  | 6224913   | 6225255   | 6  | 342  | NA | 1  | 5  | NA | NA | NA |
| Prost-AdenoCA | 0bfd1043-8170-e3e4-e050-11ac0c4860c5 | 5  | 9057545   | 9059103   | 11 | 1558 | 1  | 7  | 3  | NA | NA | NA |

|               |                                      |    |           |           |    |      |    |    |    |    |    |    |
|---------------|--------------------------------------|----|-----------|-----------|----|------|----|----|----|----|----|----|
| Prost-AdenoCA | Obfd1043-8170-e3e4-e050-11ac0c4860c5 | 5  | 9148181   | 9150712   | 9  | 2531 | NA | 7  | 2  | NA | NA | NA |
| Prost-AdenoCA | Obfd1043-8170-e3e4-e050-11ac0c4860c5 | 5  | 14703507  | 14705063  | 8  | 1556 | NA | 7  | 1  | NA | NA | NA |
| Prost-AdenoCA | Obfd1043-8170-e3e4-e050-11ac0c4860c5 | 5  | 50372307  | 50374349  | 10 | 2042 | 1  | 6  | 3  | NA | NA | NA |
| Prost-AdenoCA | Obfd1043-8170-e3e4-e050-11ac0c4860c5 | 7  | 132635300 | 132636140 | 6  | 840  | NA | 4  | 2  | NA | NA | NA |
| Prost-AdenoCA | Obfd1043-8170-e3e4-e050-11ac0c4860c5 | 9  | 88785861  | 88788780  | 13 | 2919 | 4  | 7  | 2  | NA | NA | NA |
| Prost-AdenoCA | Obfd1043-8170-e3e4-e050-11ac0c4860c5 | 18 | 4656427   | 4656788   | 9  | 361  | 1  | 6  | 2  | NA | NA | NA |
| Prost-AdenoCA | Obfd1043-8172-e3e4-e050-11ac0c4860c5 | 4  | 52873723  | 52879886  | 15 | 6163 | 1  | 8  | 5  | NA | 1  | NA |
| Prost-AdenoCA | Obfd1043-8172-e3e4-e050-11ac0c4860c5 | 5  | 6224913   | 6225255   | 6  | 342  | NA | 1  | 5  | NA | NA | NA |
| Prost-AdenoCA | Obfd1043-8172-e3e4-e050-11ac0c4860c5 | 5  | 9057545   | 9059103   | 11 | 1558 | 1  | 7  | 3  | NA | NA | NA |
| Prost-AdenoCA | Obfd1043-8172-e3e4-e050-11ac0c4860c5 | 5  | 9148181   | 9150712   | 9  | 2531 | NA | 7  | 2  | NA | NA | NA |
| Prost-AdenoCA | Obfd1043-8172-e3e4-e050-11ac0c4860c5 | 5  | 14703507  | 14705063  | 8  | 1556 | NA | 7  | 1  | NA | NA | NA |
| Prost-AdenoCA | Obfd1043-8172-e3e4-e050-11ac0c4860c5 | 18 | 4656427   | 4656788   | 9  | 361  | 1  | 6  | 2  | NA | NA | NA |
| Prost-AdenoCA | Obfd1043-8173-e3e4-e050-11ac0c4860c5 | 4  | 52873723  | 52879886  | 15 | 6163 | 1  | 8  | 5  | NA | 1  | NA |
| Prost-AdenoCA | Obfd1043-8173-e3e4-e050-11ac0c4860c5 | 5  | 6224913   | 6225255   | 6  | 342  | NA | 1  | 5  | NA | NA | NA |
| Prost-AdenoCA | Obfd1043-8173-e3e4-e050-11ac0c4860c5 | 5  | 9057545   | 9059103   | 11 | 1558 | 1  | 7  | 3  | NA | NA | NA |
| Prost-AdenoCA | Obfd1043-8173-e3e4-e050-11ac0c4860c5 | 5  | 9148181   | 9150712   | 9  | 2531 | NA | 7  | 2  | NA | NA | NA |
| Prost-AdenoCA | Obfd1043-8173-e3e4-e050-11ac0c4860c5 | 5  | 14703507  | 14705063  | 8  | 1556 | NA | 7  | 1  | NA | NA | NA |
| Prost-AdenoCA | Obfd1043-8173-e3e4-e050-11ac0c4860c5 | 18 | 4656427   | 4656788   | 9  | 361  | 1  | 6  | 2  | NA | NA | NA |
| Prost-AdenoCA | Obfd1043-8175-e3e4-e050-11ac0c4860c5 | 4  | 52873723  | 52879886  | 15 | 6163 | 1  | 8  | 5  | NA | 1  | NA |
| Prost-AdenoCA | Obfd1043-8175-e3e4-e050-11ac0c4860c5 | 5  | 6224913   | 6228330   | 7  | 3417 | 1  | 1  | 5  | NA | NA | NA |
| Prost-AdenoCA | Obfd1043-8175-e3e4-e050-11ac0c4860c5 | 5  | 9057545   | 9059103   | 11 | 1558 | 1  | 7  | 3  | NA | NA | NA |
| Prost-AdenoCA | Obfd1043-8175-e3e4-e050-11ac0c4860c5 | 5  | 9148181   | 9150712   | 9  | 2531 | NA | 7  | 2  | NA | NA | NA |
| Prost-AdenoCA | Obfd1043-8175-e3e4-e050-11ac0c4860c5 | 5  | 14703507  | 14705063  | 8  | 1556 | NA | 7  | 1  | NA | NA | NA |
| Prost-AdenoCA | Obfd1043-8175-e3e4-e050-11ac0c4860c5 | 10 | 38562796  | 38565246  | 8  | 2450 | 1  | 2  | 4  | NA | NA | 1  |
| Prost-AdenoCA | Obfd1043-8175-e3e4-e050-11ac0c4860c5 | 18 | 4656427   | 4656788   | 9  | 361  | 1  | 6  | 2  | NA | NA | NA |
| Prost-AdenoCA | Obfd1043-8177-e3e4-e050-11ac0c4860c5 | 5  | 168670368 | 168671207 | 6  | 839  | NA | 4  | 2  | NA | NA | NA |
| Prost-AdenoCA | Obfd1043-8177-e3e4-e050-11ac0c4860c5 | 7  | 1981655   | 1984863   | 8  | 3208 | 2  | 1  | 4  | NA | 1  | NA |
| Prost-AdenoCA | Obfd1043-8177-e3e4-e050-11ac0c4860c5 | 7  | 2045259   | 2046493   | 14 | 1234 | 2  | 9  | 3  | NA | NA | NA |
| Prost-AdenoCA | Obfd1043-8177-e3e4-e050-11ac0c4860c5 | 7  | 4407976   | 4414903   | 16 | 6927 | 1  | 9  | 5  | NA | 1  | NA |
| Prost-AdenoCA | Obfd1043-8177-e3e4-e050-11ac0c4860c5 | 7  | 156212796 | 156213727 | 7  | 931  | NA | 5  | 2  | NA | NA | NA |
| Prost-AdenoCA | Obfd1043-817c-e3e4-e050-11ac0c4860c5 | 2  | 199337264 | 199337792 | 6  | 528  | 1  | NA | 5  | NA | NA | NA |
| Prost-AdenoCA | Obfd1043-817c-e3e4-e050-11ac0c4860c5 | 6  | 140575899 | 140577888 | 14 | 1989 | 2  | 2  | 10 | NA | NA | NA |
| Prost-AdenoCA | Obfd1043-817c-e3e4-e050-11ac0c4860c5 | 8  | 75215998  | 75216332  | 6  | 334  | 1  | 3  | 2  | NA | NA | NA |
| Prost-AdenoCA | Obfd1043-817e-e3e4-e050-11ac0c4860c5 | 2  | 209243596 | 209244201 | 11 | 605  | 2  | 6  | 3  | NA | NA | NA |
| Prost-AdenoCA | Obfd1043-817e-e3e4-e050-11ac0c4860c5 | 10 | 76702210  | 76707043  | 13 | 4833 | 1  | 8  | 4  | NA | NA | NA |
| Prost-AdenoCA | Obfd1043-8180-e3e4-e050-11ac0c4860c5 | 1  | 61307445  | 61310046  | 11 | 2601 | NA | 5  | 6  | NA | NA | NA |
| Prost-AdenoCA | Obfd1043-8180-e3e4-e050-11ac0c4860c5 | 1  | 63565371  | 63566341  | 10 | 970  | 1  | 4  | 5  | NA | NA | NA |
| Prost-AdenoCA | Obfd1043-8180-e3e4-e050-11ac0c4860c5 | 3  | 142796540 | 142800809 | 6  | 4269 | NA | 2  | 3  | NA | NA | 1  |
| Prost-AdenoCA | Obfd1043-8180-e3e4-e050-11ac0c4860c5 | 13 | 35770662  | 35772925  | 11 | 2263 | NA | 4  | 7  | NA | NA | NA |
| Prost-AdenoCA | Obfd1043-8180-e3e4-e050-11ac0c4860c5 | 22 | 28343756  | 28344512  | 7  | 756  | NA | 1  | NA | 2  | 2  | 2  |
| Prost-AdenoCA | Obfd1043-8181-e3e4-e050-11ac0c4860c5 | 1  | 61307445  | 61310046  | 11 | 2601 | NA | 5  | 6  | NA | NA | NA |
| Prost-AdenoCA | Obfd1043-8181-e3e4-e050-11ac0c4860c5 | 1  | 63565371  | 63566341  | 10 | 970  | 1  | 4  | 5  | NA | NA | NA |
| Prost-AdenoCA | Obfd1043-8181-e3e4-e050-11ac0c4860c5 | 13 | 35770662  | 35772925  | 11 | 2263 | NA | 4  | 7  | NA | NA | NA |
| Prost-AdenoCA | Obfd1043-8181-e3e4-e050-11ac0c4860c5 | 22 | 28343756  | 28344512  | 7  | 756  | NA | 1  | NA | 2  | 2  | 2  |
| Prost-AdenoCA | Obfd1043-8181-e3e4-e050-11ac0c4860c5 | X  | 69416693  | 69423267  | 12 | 6574 | NA | 12 | NA | NA | NA | NA |
| Prost-AdenoCA | Obfd1043-8183-e3e4-e050-11ac0c4860c5 | 2  | 209243596 | 209244201 | 11 | 605  | 2  | 6  | 3  | NA | NA | NA |
| Prost-AdenoCA | Obfd1043-8183-e3e4-e050-11ac0c4860c5 | 4  | 178721787 | 178721794 | 6  | 7    | 3  | 1  | 2  | NA | NA | NA |
| Prost-AdenoCA | Obfd1043-8183-e3e4-e050-11ac0c4860c5 | 10 | 63252801  | 63252813  | 8  | 12   | 1  | 2  | NA | 2  | 1  | 2  |
| Prost-AdenoCA | Obfd1043-8183-e3e4-e050-11ac0c4860c5 | 10 | 76702210  | 76711837  | 14 | 9627 | 1  | 8  | 5  | NA | NA | NA |
| Prost-AdenoCA | Obfd1043-8187-e3e4-e050-11ac0c4860c5 | 1  | 46529669  | 46532702  | 6  | 3033 | NA | 4  | 2  | NA | NA | NA |
| Prost-AdenoCA | Obfd1043-8187-e3e4-e050-11ac0c4860c5 | 4  | 103213423 | 103222706 | 20 | 9283 | 2  | 9  | 7  | NA | 1  | 1  |
| Prost-AdenoCA | Obfd1043-8189-e3e4-e050-11ac0c4860c5 | 7  | 113961488 | 113963382 | 8  | 1894 | 1  | 1  | 6  | NA | NA | NA |
| Prost-AdenoCA | Obfd1043-8189-e3e4-e050-11ac0c4860c5 | 7  | 114050280 | 114052288 | 7  | 2008 | NA | NA | 7  | NA | NA | NA |
| Prost-AdenoCA | Obfd1043-8189-e3e4-e050-11ac0c4860c5 | 8  | 56634262  | 56638657  | 20 | 4395 | 2  | 9  | 9  | NA | NA | NA |
| Prost-AdenoCA | Obfd1043-8189-e3e4-e050-11ac0c4860c5 | 8  | 56694956  | 56695349  | 7  | 393  | 1  | 2  | 4  | NA | NA | NA |
| Prost-AdenoCA | Obfd1043-8189-e3e4-e050-11ac0c4860c5 | 8  | 124281863 | 124284377 | 17 | 2514 | 3  | 7  | 7  | NA | NA | NA |
| Prost-AdenoCA | Obfd1043-8189-e3e4-e050-11ac0c4860c5 | 8  | 128391118 | 128392721 | 7  | 1603 | 1  | 6  | NA | NA | NA | NA |
| Prost-AdenoCA | Obfd1043-8189-e3e4-e050-11ac0c4860c5 | 10 | 34496955  | 34498368  | 17 | 1413 | NA | 11 | 6  | NA | NA | NA |
| Prost-AdenoCA | Obfd1043-8189-e3e4-e050-11ac0c4860c5 | 19 | 59097579  | 59098153  | 7  | 574  | 1  | 5  | 1  | NA | NA | NA |
| Prost-AdenoCA | Obfd1068-3fc3-a95b-e050-11ac0c4860c3 | 4  | 52873723  | 52879886  | 15 | 6163 | 1  | 8  | 5  | NA | 1  | NA |

|               |                                      |    |           |           |    |       |    |    |    |    |    |    |
|---------------|--------------------------------------|----|-----------|-----------|----|-------|----|----|----|----|----|----|
| Prost-AdenoCA | 0bfd1068-3fc3-a95b-e050-11ac0c4860c3 | 5  | 6224913   | 6225255   | 6  | 342   | NA | 1  | 5  | NA | NA | NA |
| Prost-AdenoCA | 0bfd1068-3fc3-a95b-e050-11ac0c4860c3 | 5  | 9057545   | 9059103   | 11 | 1558  | 1  | 7  | 3  | NA | NA | NA |
| Prost-AdenoCA | 0bfd1068-3fc3-a95b-e050-11ac0c4860c3 | 5  | 9148181   | 9150712   | 8  | 2531  | NA | 6  | 2  | NA | NA | NA |
| Prost-AdenoCA | 0bfd1068-3fc3-a95b-e050-11ac0c4860c3 | 5  | 14703507  | 14705063  | 8  | 1556  | NA | 7  | 1  | NA | NA | NA |
| Prost-AdenoCA | 0bfd1068-3fc3-a95b-e050-11ac0c4860c3 | 18 | 4656427   | 4656788   | 9  | 361   | 1  | 6  | 2  | NA | NA | NA |
| Prost-AdenoCA | 0bfd1068-3fca-a95b-e050-11ac0c4860c3 | 5  | 168670368 | 168671207 | 6  | 839   | NA | 4  | 2  | NA | NA | NA |
| Prost-AdenoCA | 0bfd1068-3fcd-a95b-e050-11ac0c4860c3 | 1  | 155099419 | 155099745 | 8  | 326   | 1  | 5  | 2  | NA | NA | NA |
| Prost-AdenoCA | 0bfd1068-3fcd-a95b-e050-11ac0c4860c3 | 8  | 40203415  | 40208671  | 7  | 5256  | 1  | 5  | 1  | NA | NA | NA |
| Prost-AdenoCA | 0bfd1068-3fcd-a95b-e050-11ac0c4860c3 | X  | 77200568  | 77202399  | 8  | 1831  | NA | 5  | 3  | NA | NA | NA |
| Prost-AdenoCA | 0bfd1068-3fcd-a95b-e050-11ac0c4860c3 | 2  | 180992013 | 180992486 | 7  | 473   | NA | 2  | 5  | NA | NA | NA |
| Prost-AdenoCA | 0bfd1068-3fcd-a95b-e050-11ac0c4860c3 | 2  | 191475730 | 191477101 | 14 | 1371  | 7  | 5  | 1  | NA | NA | 1  |
| Prost-AdenoCA | 0bfd1068-3fcd-a95b-e050-11ac0c4860c3 | 6  | 140575899 | 140577888 | 14 | 1989  | 2  | 2  | 10 | NA | NA | NA |
| Prost-AdenoCA | 0bfd1068-3fcd-a95b-e050-11ac0c4860c3 | 8  | 75215998  | 75216332  | 6  | 334   | 1  | 3  | 2  | NA | NA | NA |
| Prost-AdenoCA | 0bfd1068-3fcd-a95b-e050-11ac0c4860c3 | X  | 65802544  | 65804555  | 6  | 2011  | 1  | 4  | 1  | NA | NA | NA |
| Prost-AdenoCA | 0bfd1068-3fd3-a95b-e050-11ac0c4860c3 | 1  | 117418082 | 117419550 | 10 | 1468  | 1  | 5  | 4  | NA | NA | NA |
| Prost-AdenoCA | 0bfd1068-3fd3-a95b-e050-11ac0c4860c3 | 1  | 117734181 | 117735463 | 11 | 1282  | 1  | 5  | 4  | NA | 1  | NA |
| Prost-AdenoCA | 0bfd1068-3fd3-a95b-e050-11ac0c4860c3 | 1  | 242070563 | 242073859 | 13 | 3296  | 1  | 7  | 5  | NA | NA | NA |
| Prost-AdenoCA | 0bfd1068-3fd3-a95b-e050-11ac0c4860c3 | 2  | 193587397 | 193593986 | 8  | 6589  | NA | 7  | 1  | NA | NA | NA |
| Prost-AdenoCA | 0bfd1068-3fd3-a95b-e050-11ac0c4860c3 | 2  | 199909346 | 199912318 | 8  | 2972  | 1  | 5  | 2  | NA | NA | NA |
| Prost-AdenoCA | 0bfd1068-3fd3-a95b-e050-11ac0c4860c3 | 2  | 233145457 | 233157583 | 15 | 12126 | 3  | 5  | 7  | NA | NA | NA |
| Prost-AdenoCA | 0bfd1068-3fd3-a95b-e050-11ac0c4860c3 | 5  | 43503216  | 43504063  | 11 | 847   | 4  | 5  | 2  | NA | NA | NA |
| Prost-AdenoCA | 0bfd1068-3fd3-a95b-e050-11ac0c4860c3 | 5  | 177108730 | 177109647 | 7  | 917   | 3  | 3  | 1  | NA | NA | NA |
| Prost-AdenoCA | 0bfd1068-3fd3-a95b-e050-11ac0c4860c3 | 6  | 52632975  | 52634630  | 6  | 1655  | NA | 3  | 3  | NA | NA | NA |
| Prost-AdenoCA | 0bfd1068-3fd3-a95b-e050-11ac0c4860c3 | 6  | 142658336 | 142661263 | 9  | 2927  | NA | 5  | 4  | NA | NA | NA |
| Prost-AdenoCA | 0bfd1068-3fd3-a95b-e050-11ac0c4860c3 | 8  | 27615033  | 27616309  | 10 | 1276  | 4  | 4  | 1  | NA | NA | 1  |
| Prost-AdenoCA | 0bfd1068-3fd3-a95b-e050-11ac0c4860c3 | 17 | 21450071  | 21454362  | 6  | 4291  | NA | 5  | NA | NA | 1  | NA |
| Prost-AdenoCA | 0bfd1068-3fd3-a95b-e050-11ac0c4860c3 | 17 | 67704590  | 67710382  | 10 | 5792  | 1  | 7  | 2  | NA | NA | NA |
| Prost-AdenoCA | 0bfd1068-3fd3-a95b-e050-11ac0c4860c3 | 17 | 67768116  | 67776676  | 13 | 8560  | 3  | 9  | 1  | NA | NA | NA |
| Prost-AdenoCA | 0bfd1068-3fd3-a95b-e050-11ac0c4860c3 | 20 | 33664883  | 33665434  | 9  | 551   | 1  | 2  | 6  | NA | NA | NA |
| Prost-AdenoCA | 0bfd1068-3fd3-a95b-e050-11ac0c4860c3 | 20 | 33687815  | 33691649  | 14 | 3834  | 1  | 7  | 6  | NA | NA | NA |
| Prost-AdenoCA | 0bfd1068-3fd3-a95b-e050-11ac0c4860c3 | 20 | 33702859  | 33711838  | 33 | 8979  | 1  | 17 | 15 | NA | NA | NA |
| Prost-AdenoCA | 0bfd1068-3fd3-a95b-e050-11ac0c4860c3 | X  | 65578467  | 65579855  | 19 | 1388  | NA | 13 | 6  | NA | NA | NA |
| Prost-AdenoCA | 0bfd1068-3fd3-a95b-e050-11ac0c4860c3 | X  | 66304027  | 66307155  | 8  | 3128  | 1  | 6  | NA | NA | 1  | NA |
| Prost-AdenoCA | 0bfd1068-3fd3-a95b-e050-11ac0c4860c3 | X  | 67054951  | 67064935  | 19 | 9984  | NA | 14 | 4  | NA | 1  | NA |
| Prost-AdenoCA | 0bfd1068-3fd3-a95b-e050-11ac0c4860c3 | X  | 67101196  | 67106780  | 11 | 5584  | NA | 8  | 3  | NA | NA | NA |
| Prost-AdenoCA | 0bfd1068-3fd3-a95b-e050-11ac0c4860c3 | X  | 67208532  | 67211855  | 10 | 3323  | NA | 9  | NA | NA | NA | 1  |
| Prost-AdenoCA | 0bfd1068-3fd5-a95b-e050-11ac0c4860c3 | 2  | 163184265 | 163187340 | 7  | 3075  | 2  | 2  | 3  | NA | NA | NA |
| Prost-AdenoCA | 0bfd1068-3fd5-a95b-e050-11ac0c4860c3 | 2  | 180992013 | 180992486 | 7  | 473   | NA | 2  | 5  | NA | NA | NA |
| Prost-AdenoCA | 0bfd1068-3fd5-a95b-e050-11ac0c4860c3 | 2  | 181104799 | 181112679 | 14 | 7880  | NA | 3  | 10 | NA | NA | 1  |
| Prost-AdenoCA | 0bfd1068-3fd5-a95b-e050-11ac0c4860c3 | 2  | 191475730 | 191477101 | 14 | 1371  | 7  | 5  | 1  | NA | NA | 1  |
| Prost-AdenoCA | 0bfd1068-3fd5-a95b-e050-11ac0c4860c3 | 4  | 138279515 | 138279776 | 6  | 261   | 2  | 3  | 1  | NA | NA | NA |
| Prost-AdenoCA | 0bfd1068-3fd5-a95b-e050-11ac0c4860c3 | 6  | 140575899 | 140577888 | 14 | 1989  | 2  | 2  | 10 | NA | NA | NA |
| Prost-AdenoCA | 0bfd1068-3fd5-a95b-e050-11ac0c4860c3 | 8  | 75215998  | 75216332  | 6  | 334   | 1  | 3  | 2  | NA | NA | NA |
| Prost-AdenoCA | 0bfd1068-3fd8-a95b-e050-11ac0c4860c3 | 1  | 219182955 | 219186381 | 7  | 3426  | NA | 4  | 3  | NA | NA | NA |
| Prost-AdenoCA | 0bfd1068-3fd8-a95b-e050-11ac0c4860c3 | 2  | 132370918 | 132372756 | 13 | 1838  | 1  | 6  | 6  | NA | NA | NA |
| Prost-AdenoCA | 0bfd1068-3fd8-a95b-e050-11ac0c4860c3 | 2  | 132986596 | 132989033 | 7  | 2437  | 1  | 6  | NA | NA | NA | NA |
| Prost-AdenoCA | 0bfd1068-3fd8-a95b-e050-11ac0c4860c3 | 2  | 138045866 | 138050977 | 7  | 5111  | NA | 3  | 4  | NA | NA | NA |
| Prost-AdenoCA | 0bfd1068-3fd8-a95b-e050-11ac0c4860c3 | 2  | 138057584 | 138064457 | 9  | 6873  | 1  | 5  | 3  | NA | NA | NA |
| Prost-AdenoCA | 0bfd1068-3fd8-a95b-e050-11ac0c4860c3 | 2  | 138489812 | 138490949 | 9  | 1137  | NA | 5  | 4  | NA | NA | NA |
| Prost-AdenoCA | 0bfd1068-3fd8-a95b-e050-11ac0c4860c3 | 3  | 62225392  | 62231451  | 12 | 6059  | 1  | 7  | 4  | NA | NA | NA |
| Prost-AdenoCA | 0bfd1068-3fd8-a95b-e050-11ac0c4860c3 | 4  | 108530561 | 108531085 | 11 | 524   | NA | NA | 11 | NA | NA | NA |
| Prost-AdenoCA | 0bfd1068-3fd8-a95b-e050-11ac0c4860c3 | 6  | 118517440 | 118526547 | 18 | 9107  | NA | 14 | 4  | NA | NA | NA |
| Prost-AdenoCA | 0bfd1068-3fd8-a95b-e050-11ac0c4860c3 | 8  | 39915996  | 39917101  | 8  | 1105  | 1  | 2  | 5  | NA | NA | NA |
| Prost-AdenoCA | 0bfd1068-3fd8-a95b-e050-11ac0c4860c3 | 8  | 39953854  | 39963547  | 14 | 9693  | 1  | 6  | 7  | NA | NA | NA |
| Prost-AdenoCA | 0bfd1068-3fd8-a95b-e050-11ac0c4860c3 | 10 | 55166305  | 55167516  | 19 | 1211  | NA | 5  | 14 | NA | NA | NA |
| Prost-AdenoCA | 0bfd1068-3fd8-a95b-e050-11ac0c4860c3 | X  | 66970033  | 66970685  | 6  | 652   | NA | 3  | 3  | NA | NA | NA |
| Prost-AdenoCA | 0bfd1068-3fd8-a95b-e050-11ac0c4860c3 | X  | 68747256  | 68749563  | 10 | 2307  | 2  | 3  | 4  | NA | 1  | NA |
| Prost-AdenoCA | 0bfd1068-3fdd-a95b-e050-11ac0c4860c3 | 1  | 219182955 | 219186381 | 7  | 3426  | NA | 4  | 3  | NA | NA | NA |
| Prost-AdenoCA | 0bfd1068-3fdd-a95b-e050-11ac0c4860c3 | 2  | 132370918 | 132372689 | 12 | 1771  | NA | 6  | 6  | NA | NA | NA |
| Prost-AdenoCA | 0bfd1068-3fdd-a95b-e050-11ac0c4860c3 | 2  | 132986596 | 132990709 | 8  | 4113  | 2  | 6  | NA | NA | NA | NA |

|               |                                      |    |           |           |    |      |    |    |    |    |    |    |
|---------------|--------------------------------------|----|-----------|-----------|----|------|----|----|----|----|----|----|
| Prost-AdenoCA | 0bfd1068-3fdd-a95b-e050-11ac0c4860c3 | 2  | 138045866 | 138050977 | 7  | 5111 | NA | 3  | 4  | NA | NA | NA |
| Prost-AdenoCA | 0bfd1068-3fdd-a95b-e050-11ac0c4860c3 | 2  | 138057584 | 138064457 | 9  | 6873 | 1  | 5  | 3  | NA | NA | NA |
| Prost-AdenoCA | 0bfd1068-3fdd-a95b-e050-11ac0c4860c3 | 2  | 138489812 | 138490949 | 9  | 1137 | NA | 5  | 4  | NA | NA | NA |
| Prost-AdenoCA | 0bfd1068-3fdd-a95b-e050-11ac0c4860c3 | 4  | 108530561 | 108531085 | 11 | 524  | NA | NA | 11 | NA | NA | NA |
| Prost-AdenoCA | 0bfd1068-3fdd-a95b-e050-11ac0c4860c3 | 6  | 118517440 | 118526547 | 18 | 9107 | NA | 14 | 4  | NA | NA | NA |
| Prost-AdenoCA | 0bfd1068-3fdd-a95b-e050-11ac0c4860c3 | 8  | 39915996  | 39917101  | 8  | 1105 | 1  | 2  | 5  | NA | NA | NA |
| Prost-AdenoCA | 0bfd1068-3fdd-a95b-e050-11ac0c4860c3 | 8  | 39953854  | 39963547  | 16 | 9693 | 1  | 7  | 8  | NA | NA | NA |
| Prost-AdenoCA | 0bfd1068-3fdd-a95b-e050-11ac0c4860c3 | 10 | 106663893 | 106667643 | 11 | 3750 | NA | 8  | 2  | NA | 1  | NA |
| Prost-AdenoCA | 0bfd1068-3fdd-a95b-e050-11ac0c4860c3 | X  | 73024842  | 73025076  | 8  | 234  | NA | 2  | 6  | NA | NA | NA |
| Prost-AdenoCA | 0bfd1068-3fdd-a95b-e050-11ac0c4860c3 | 1  | 61307445  | 61310046  | 11 | 2601 | NA | 5  | 6  | NA | NA | NA |
| Prost-AdenoCA | 0bfd1068-3fdd-a95b-e050-11ac0c4860c3 | 1  | 63565371  | 63566341  | 10 | 970  | 1  | 4  | 5  | NA | NA | NA |
| Prost-AdenoCA | 0bfd1068-3fdd-a95b-e050-11ac0c4860c3 | 3  | 142796540 | 142800809 | 6  | 4269 | NA | 2  | 3  | NA | NA | 1  |
| Prost-AdenoCA | 0bfd1068-3fdd-a95b-e050-11ac0c4860c3 | 13 | 35770662  | 35772925  | 11 | 2263 | NA | 4  | 7  | NA | NA | NA |
| Prost-AdenoCA | 0bfd1068-3fdd-a95b-e050-11ac0c4860c3 | 22 | 28343756  | 28344512  | 7  | 756  | NA | 1  | NA | 2  | 2  | 2  |
| Prost-AdenoCA | 0bfd1068-3fe1-a95b-e050-11ac0c4860c3 | 1  | 61307445  | 61310046  | 11 | 2601 | NA | 5  | 6  | NA | NA | NA |
| Prost-AdenoCA | 0bfd1068-3fe1-a95b-e050-11ac0c4860c3 | 1  | 63565371  | 63566341  | 10 | 970  | 1  | 4  | 5  | NA | NA | NA |
| Prost-AdenoCA | 0bfd1068-3fe1-a95b-e050-11ac0c4860c3 | 3  | 142796540 | 142800809 | 6  | 4269 | NA | 2  | 3  | NA | NA | 1  |
| Prost-AdenoCA | 0bfd1068-3fe1-a95b-e050-11ac0c4860c3 | 5  | 51939118  | 51941470  | 11 | 2352 | 4  | 4  | 3  | NA | NA | NA |
| Prost-AdenoCA | 0bfd1068-3fe1-a95b-e050-11ac0c4860c3 | 13 | 35770662  | 35772925  | 11 | 2263 | NA | 4  | 7  | NA | NA | NA |
| Prost-AdenoCA | 0bfd1068-3fe1-a95b-e050-11ac0c4860c3 | 22 | 28343756  | 28344512  | 7  | 756  | NA | 1  | NA | 2  | 2  | 2  |
| Prost-AdenoCA | 0bfd1068-3fe4-a95b-e050-11ac0c4860c3 | 7  | 113961488 | 113963382 | 8  | 1894 | 1  | 1  | 6  | NA | NA | NA |
| Prost-AdenoCA | 0bfd1068-3fe4-a95b-e050-11ac0c4860c3 | 7  | 114050280 | 114052288 | 7  | 2008 | NA | NA | 7  | NA | NA | NA |
| Prost-AdenoCA | 0bfd1068-3fe4-a95b-e050-11ac0c4860c3 | 8  | 56634262  | 56638657  | 17 | 4395 | 2  | 9  | 6  | NA | NA | NA |
| Prost-AdenoCA | 0bfd1068-3fe4-a95b-e050-11ac0c4860c3 | 8  | 124281863 | 124286833 | 16 | 4970 | 4  | 6  | 6  | NA | NA | NA |
| Prost-AdenoCA | 0bfd1068-3fe4-a95b-e050-11ac0c4860c3 | 10 | 34496955  | 34498368  | 17 | 1413 | NA | 11 | 6  | NA | NA | NA |
| Prost-AdenoCA | 0bfd1068-3fe4-a95b-e050-11ac0c4860c3 | 19 | 59097579  | 59098153  | 8  | 574  | 1  | 6  | 1  | NA | NA | NA |
| Prost-AdenoCA | 0bfe2ac9-0af3-c248-e050-11ac0d487e1c | 2  | 209243596 | 209244201 | 11 | 605  | 2  | 6  | 3  | NA | NA | NA |
| Prost-AdenoCA | 0bfe2ac9-0af3-c248-e050-11ac0d487e1c | 4  | 178721787 | 178721794 | 6  | 7    | 3  | 1  | 2  | NA | NA | NA |
| Prost-AdenoCA | 0bfe2ac9-0af3-c248-e050-11ac0d487e1c | 10 | 63252801  | 63252813  | 7  | 12   | NA | 2  | NA | 2  | 1  | 2  |
| Prost-AdenoCA | 0bfe2ac9-0af3-c248-e050-11ac0d487e1c | 10 | 76702210  | 76707043  | 13 | 4833 | 1  | 8  | 4  | NA | NA | NA |
| Prost-AdenoCA | 0bfe2ac9-0af5-c248-e050-11ac0d487e1c | 1  | 219182955 | 219186381 | 7  | 3426 | NA | 4  | 3  | NA | NA | NA |
| Prost-AdenoCA | 0bfe2ac9-0af5-c248-e050-11ac0d487e1c | 2  | 132370918 | 132372756 | 13 | 1838 | 1  | 6  | 6  | NA | NA | NA |
| Prost-AdenoCA | 0bfe2ac9-0af5-c248-e050-11ac0d487e1c | 2  | 132986596 | 132989033 | 7  | 2437 | 1  | 6  | NA | NA | NA | NA |
| Prost-AdenoCA | 0bfe2ac9-0af5-c248-e050-11ac0d487e1c | 2  | 138045866 | 138050977 | 7  | 5111 | NA | 3  | 4  | NA | NA | NA |
| Prost-AdenoCA | 0bfe2ac9-0af5-c248-e050-11ac0d487e1c | 2  | 138059516 | 138064457 | 7  | 4941 | 1  | 4  | 2  | NA | NA | NA |
| Prost-AdenoCA | 0bfe2ac9-0af5-c248-e050-11ac0d487e1c | 2  | 138489812 | 138490949 | 9  | 1137 | NA | 5  | 4  | NA | NA | NA |
| Prost-AdenoCA | 0bfe2ac9-0af5-c248-e050-11ac0d487e1c | 4  | 108530561 | 108531085 | 11 | 524  | NA | NA | 11 | NA | NA | NA |
| Prost-AdenoCA | 0bfe2ac9-0af5-c248-e050-11ac0d487e1c | 6  | 118517440 | 118526547 | 18 | 9107 | NA | 14 | 4  | NA | NA | NA |
| Prost-AdenoCA | 0bfe2ac9-0af5-c248-e050-11ac0d487e1c | 8  | 39915996  | 39917101  | 8  | 1105 | 1  | 2  | 5  | NA | NA | NA |
| Prost-AdenoCA | 0bfe2ac9-0af5-c248-e050-11ac0d487e1c | 8  | 39953854  | 39963547  | 16 | 9693 | 1  | 7  | 8  | NA | NA | NA |
| Prost-AdenoCA | 0bfe2ac9-0af5-c248-e050-11ac0d487e1c | 10 | 55166305  | 55167516  | 19 | 1211 | NA | 5  | 14 | NA | NA | NA |
| Prost-AdenoCA | 0bfe2ac9-0af5-c248-e050-11ac0d487e1c | X  | 72829542  | 72832540  | 6  | 2998 | 1  | 2  | 3  | NA | NA | NA |
| Prost-AdenoCA | 0bfe2ac9-0af8-c248-e050-11ac0d487e1c | 1  | 219182955 | 219186381 | 7  | 3426 | NA | 4  | 3  | NA | NA | NA |
| Prost-AdenoCA | 0bfe2ac9-0af8-c248-e050-11ac0d487e1c | 2  | 132370918 | 132372689 | 12 | 1771 | NA | 6  | 6  | NA | NA | NA |
| Prost-AdenoCA | 0bfe2ac9-0af8-c248-e050-11ac0d487e1c | 2  | 132986596 | 132990709 | 8  | 4113 | 2  | 6  | NA | NA | NA | NA |
| Prost-AdenoCA | 0bfe2ac9-0af8-c248-e050-11ac0d487e1c | 2  | 138045866 | 138050977 | 7  | 5111 | NA | 3  | 4  | NA | NA | NA |
| Prost-AdenoCA | 0bfe2ac9-0af8-c248-e050-11ac0d487e1c | 2  | 138059516 | 138064457 | 7  | 4941 | NA | 4  | 3  | NA | NA | NA |
| Prost-AdenoCA | 0bfe2ac9-0af8-c248-e050-11ac0d487e1c | 2  | 138489812 | 138490949 | 9  | 1137 | NA | 5  | 4  | NA | NA | NA |
| Prost-AdenoCA | 0bfe2ac9-0af8-c248-e050-11ac0d487e1c | 4  | 108530561 | 108531085 | 11 | 524  | NA | NA | 11 | NA | NA | NA |
| Prost-AdenoCA | 0bfe2ac9-0af8-c248-e050-11ac0d487e1c | 6  | 118517440 | 118526547 | 18 | 9107 | NA | 14 | 4  | NA | NA | NA |
| Prost-AdenoCA | 0bfe2ac9-0af8-c248-e050-11ac0d487e1c | 8  | 39915996  | 39917101  | 8  | 1105 | 1  | 2  | 5  | NA | NA | NA |
| Prost-AdenoCA | 0bfe2ac9-0af8-c248-e050-11ac0d487e1c | 8  | 39953854  | 39963547  | 15 | 9693 | 1  | 7  | 7  | NA | NA | NA |
| Prost-AdenoCA | 0bfe2ac9-0af8-c248-e050-11ac0d487e1c | 10 | 55166305  | 55167516  | 19 | 1211 | NA | 5  | 14 | NA | NA | NA |
| Prost-AdenoCA | 0bfe2ac9-0af8-c248-e050-11ac0d487e1c | X  | 73024842  | 73025076  | 8  | 234  | NA | 2  | 6  | NA | NA | NA |
| Prost-AdenoCA | 0bfe2ac9-0afa-c248-e050-11ac0d487e1c | 7  | 113961488 | 113963382 | 8  | 1894 | 1  | 1  | 6  | NA | NA | NA |
| Prost-AdenoCA | 0bfe2ac9-0afa-c248-e050-11ac0d487e1c | 7  | 114050280 | 114052288 | 7  | 2008 | NA | NA | 7  | NA | NA | NA |
| Prost-AdenoCA | 0bfe2ac9-0afa-c248-e050-11ac0d487e1c | 10 | 34496955  | 34498368  | 17 | 1413 | NA | 11 | 6  | NA | NA | NA |
| Prost-AdenoCA | 0bfe2ac9-0afd-c248-e050-11ac0d487e1c | 7  | 113961488 | 113963382 | 8  | 1894 | 1  | 1  | 6  | NA | NA | NA |
| Prost-AdenoCA | 0bfe2ac9-0afd-c248-e050-11ac0d487e1c | 7  | 114050280 | 114052288 | 7  | 2008 | NA | NA | 7  | NA | NA | NA |
| Prost-AdenoCA | 0bfe2ac9-0afd-c248-e050-11ac0d487e1c | 8  | 56634262  | 56638657  | 20 | 4395 | 2  | 9  | 9  | NA | NA | NA |

|               |                                      |    |           |           |    |       |    |    |    |    |    |    |
|---------------|--------------------------------------|----|-----------|-----------|----|-------|----|----|----|----|----|----|
| Prost-AdenoCA | 0bfe2ac9-0afd-c248-e050-11ac0d487e1c | 8  | 56694956  | 56695349  | 7  | 393   | 1  | 2  | 4  | NA | NA | NA |
| Prost-AdenoCA | 0bfe2ac9-0afd-c248-e050-11ac0d487e1c | 8  | 124281863 | 124284377 | 17 | 2514  | 3  | 7  | 7  | NA | NA | NA |
| Prost-AdenoCA | 0bfe2ac9-0afd-c248-e050-11ac0d487e1c | 8  | 128391806 | 128392721 | 7  | 915   | 2  | 5  | NA | NA | NA | NA |
| Prost-AdenoCA | 0bfe2ac9-0afd-c248-e050-11ac0d487e1c | 10 | 34496955  | 34498368  | 17 | 1413  | NA | 11 | 6  | NA | NA | NA |
| Prost-AdenoCA | 0bfe2ac9-0afd-c248-e050-11ac0d487e1c | 19 | 59097579  | 59098153  | 8  | 574   | 1  | 6  | 1  | NA | NA | NA |
| Prost-AdenoCA | 0bfe2ac9-0aff-c248-e050-11ac0d487e1c | 7  | 113961488 | 113963382 | 8  | 1894  | 1  | 1  | 6  | NA | NA | NA |
| Prost-AdenoCA | 0bfe2ac9-0aff-c248-e050-11ac0d487e1c | 7  | 114050280 | 114052288 | 7  | 2008  | NA | NA | 7  | NA | NA | NA |
| Prost-AdenoCA | 0bfe2ac9-0aff-c248-e050-11ac0d487e1c | 8  | 56634262  | 56638657  | 20 | 4395  | 2  | 9  | 9  | NA | NA | NA |
| Prost-AdenoCA | 0bfe2ac9-0aff-c248-e050-11ac0d487e1c | 8  | 56694956  | 56695349  | 7  | 393   | 1  | 2  | 4  | NA | NA | NA |
| Prost-AdenoCA | 0bfe2ac9-0aff-c248-e050-11ac0d487e1c | 8  | 124281863 | 124284377 | 17 | 2514  | 3  | 7  | 7  | NA | NA | NA |
| Prost-AdenoCA | 0bfe2ac9-0aff-c248-e050-11ac0d487e1c | 8  | 128391118 | 128392721 | 7  | 1603  | 1  | 6  | NA | NA | NA | NA |
| Prost-AdenoCA | 0bfe2ac9-0aff-c248-e050-11ac0d487e1c | 10 | 34496955  | 34498368  | 17 | 1413  | NA | 11 | 6  | NA | NA | NA |
| Prost-AdenoCA | 0bfe2ac9-0aff-c248-e050-11ac0d487e1c | 19 | 59097579  | 59098063  | 6  | 484   | 1  | 4  | 1  | NA | NA | NA |
| Prost-AdenoCA | 0bfeb9f9-c779-e57d-e050-11ac0d487827 | 1  | 219182955 | 219186381 | 7  | 3426  | NA | 4  | 3  | NA | NA | NA |
| Prost-AdenoCA | 0bfeb9f9-c779-e57d-e050-11ac0d487827 | 2  | 132988345 | 132989033 | 6  | 688   | 1  | 5  | NA | NA | NA | NA |
| Prost-AdenoCA | 0bfeb9f9-c779-e57d-e050-11ac0d487827 | 2  | 138045866 | 138050977 | 7  | 5111  | NA | 3  | 4  | NA | NA | NA |
| Prost-AdenoCA | 0bfeb9f9-c779-e57d-e050-11ac0d487827 | 2  | 138489812 | 138490949 | 9  | 1137  | NA | 5  | 4  | NA | NA | NA |
| Prost-AdenoCA | 0bfeb9f9-c779-e57d-e050-11ac0d487827 | 4  | 108530561 | 108531085 | 10 | 524   | NA | NA | 10 | NA | NA | NA |
| Prost-AdenoCA | 0bfeb9f9-c779-e57d-e050-11ac0d487827 | 6  | 118517440 | 118526547 | 18 | 9107  | NA | 14 | 4  | NA | NA | NA |
| Prost-AdenoCA | 0bfeb9f9-c779-e57d-e050-11ac0d487827 | 8  | 39915996  | 39917101  | 8  | 1105  | 1  | 2  | 5  | NA | NA | NA |
| Prost-AdenoCA | 0bfeb9f9-c779-e57d-e050-11ac0d487827 | 8  | 39953854  | 39954433  | 14 | 579   | NA | 6  | 8  | NA | NA | NA |
| Prost-AdenoCA | 0bfeb9f9-c779-e57d-e050-11ac0d487827 | 10 | 55166305  | 55167516  | 19 | 1211  | NA | 5  | 14 | NA | NA | NA |
| Prost-AdenoCA | 0bfeb9f9-c77d-e57d-e050-11ac0d487827 | 1  | 61307445  | 61310046  | 11 | 2601  | NA | 5  | 6  | NA | NA | NA |
| Prost-AdenoCA | 0bfeb9f9-c77d-e57d-e050-11ac0d487827 | 1  | 63565371  | 63566341  | 10 | 970   | 1  | 4  | 5  | NA | NA | NA |
| Prost-AdenoCA | 0bfeb9f9-c77d-e57d-e050-11ac0d487827 | 3  | 142796540 | 142800809 | 6  | 4269  | NA | 2  | 3  | NA | NA | 1  |
| Prost-AdenoCA | 0bfeb9f9-c77d-e57d-e050-11ac0d487827 | 13 | 35770662  | 35772925  | 11 | 2263  | NA | 4  | 7  | NA | NA | NA |
| Prost-AdenoCA | 0bfeb9f9-c77d-e57d-e050-11ac0d487827 | 22 | 28343756  | 28344512  | 7  | 756   | NA | 1  | NA | 2  | 2  | 2  |
| Prost-AdenoCA | 0bfeb9f9-c77f-e57d-e050-11ac0d487827 | 1  | 219182955 | 219186381 | 7  | 3426  | NA | 4  | 3  | NA | NA | NA |
| Prost-AdenoCA | 0bfeb9f9-c77f-e57d-e050-11ac0d487827 | 2  | 132370918 | 132372756 | 12 | 1838  | 1  | 6  | 5  | NA | NA | NA |
| Prost-AdenoCA | 0bfeb9f9-c77f-e57d-e050-11ac0d487827 | 2  | 132986596 | 132990709 | 8  | 4113  | 2  | 6  | NA | NA | NA | NA |
| Prost-AdenoCA | 0bfeb9f9-c77f-e57d-e050-11ac0d487827 | 2  | 138045866 | 138050977 | 7  | 5111  | NA | 3  | 4  | NA | NA | NA |
| Prost-AdenoCA | 0bfeb9f9-c77f-e57d-e050-11ac0d487827 | 2  | 138057584 | 138064457 | 9  | 6873  | 1  | 5  | 3  | NA | NA | NA |
| Prost-AdenoCA | 0bfeb9f9-c77f-e57d-e050-11ac0d487827 | 2  | 138489812 | 138490949 | 9  | 1137  | NA | 5  | 4  | NA | NA | NA |
| Prost-AdenoCA | 0bfeb9f9-c77f-e57d-e050-11ac0d487827 | 4  | 108530561 | 108531085 | 11 | 524   | NA | NA | 11 | NA | NA | NA |
| Prost-AdenoCA | 0bfeb9f9-c77f-e57d-e050-11ac0d487827 | 6  | 118517440 | 118526547 | 18 | 9107  | NA | 14 | 4  | NA | NA | NA |
| Prost-AdenoCA | 0bfeb9f9-c77f-e57d-e050-11ac0d487827 | 8  | 35480058  | 35483588  | 8  | 3530  | NA | 5  | 3  | NA | NA | NA |
| Prost-AdenoCA | 0bfeb9f9-c77f-e57d-e050-11ac0d487827 | 8  | 35503855  | 35507549  | 11 | 3694  | 1  | 3  | 7  | NA | NA | NA |
| Prost-AdenoCA | 0bfeb9f9-c77f-e57d-e050-11ac0d487827 | 8  | 36813475  | 36836329  | 28 | 22854 | 1  | 14 | 12 | NA | 1  | NA |
| Prost-AdenoCA | 0bfeb9f9-c77f-e57d-e050-11ac0d487827 | 8  | 39915996  | 39917101  | 8  | 1105  | 1  | 2  | 5  | NA | NA | NA |
| Prost-AdenoCA | 0bfeb9f9-c77f-e57d-e050-11ac0d487827 | 8  | 39953854  | 39954612  | 15 | 758   | NA | 7  | 8  | NA | NA | NA |
| Prost-AdenoCA | 0bfeb9f9-c77f-e57d-e050-11ac0d487827 | 8  | 84531463  | 84540666  | 15 | 9203  | NA | 8  | 7  | NA | NA | NA |
| Prost-AdenoCA | 0bfeb9f9-c77f-e57d-e050-11ac0d487827 | 8  | 85380962  | 85384918  | 9  | 3956  | 1  | 4  | 4  | NA | NA | NA |
| Prost-AdenoCA | 0bfeb9f9-c77f-e57d-e050-11ac0d487827 | 10 | 55166305  | 55167516  | 19 | 1211  | NA | 5  | 14 | NA | NA | NA |
| Prost-AdenoCA | 0bfeb9f9-c781-e57d-e050-11ac0d487827 | 7  | 113961488 | 113963382 | 8  | 1894  | 1  | 1  | 6  | NA | NA | NA |
| Prost-AdenoCA | 0bfeb9f9-c781-e57d-e050-11ac0d487827 | 7  | 114050280 | 114052288 | 7  | 2008  | NA | NA | 7  | NA | NA | NA |
| Prost-AdenoCA | 0bfeb9f9-c781-e57d-e050-11ac0d487827 | 8  | 56634262  | 56638657  | 20 | 4395  | 2  | 9  | 9  | NA | NA | NA |
| Prost-AdenoCA | 0bfeb9f9-c781-e57d-e050-11ac0d487827 | 8  | 56694956  | 56695349  | 7  | 393   | 1  | 2  | 4  | NA | NA | NA |
| Prost-AdenoCA | 0bfeb9f9-c781-e57d-e050-11ac0d487827 | 8  | 124281863 | 124284377 | 17 | 2514  | 3  | 7  | 7  | NA | NA | NA |
| Prost-AdenoCA | 0bfeb9f9-c781-e57d-e050-11ac0d487827 | 8  | 127391614 | 127392595 | 10 | 981   | 1  | 2  | 7  | NA | NA | NA |
| Prost-AdenoCA | 0bfeb9f9-c781-e57d-e050-11ac0d487827 | 10 | 34496955  | 34498368  | 17 | 1413  | NA | 11 | 6  | NA | NA | NA |
| Prost-AdenoCA | 0bfeb9f9-c781-e57d-e050-11ac0d487827 | 19 | 59097579  | 59098153  | 8  | 574   | 1  | 6  | 1  | NA | NA | NA |
| Prost-AdenoCA | 0bfeb9f9-c783-e57d-e050-11ac0d487827 | 7  | 113961488 | 113963382 | 8  | 1894  | 1  | 1  | 6  | NA | NA | NA |
| Prost-AdenoCA | 0bfeb9f9-c783-e57d-e050-11ac0d487827 | 7  | 114050280 | 114052288 | 7  | 2008  | NA | NA | 7  | NA | NA | NA |
| Prost-AdenoCA | 0bfeb9f9-c783-e57d-e050-11ac0d487827 | 8  | 56634262  | 56638657  | 20 | 4395  | 2  | 9  | 9  | NA | NA | NA |
| Prost-AdenoCA | 0bfeb9f9-c783-e57d-e050-11ac0d487827 | 8  | 56694956  | 56695349  | 7  | 393   | 1  | 2  | 4  | NA | NA | NA |
| Prost-AdenoCA | 0bfeb9f9-c783-e57d-e050-11ac0d487827 | 8  | 124281863 | 124286833 | 18 | 4970  | 4  | 7  | 7  | NA | NA | NA |
| Prost-AdenoCA | 0bfeb9f9-c783-e57d-e050-11ac0d487827 | 10 | 34496955  | 34498368  | 17 | 1413  | NA | 11 | 6  | NA | NA | NA |
| Prost-AdenoCA | 0bfeb9f9-c783-e57d-e050-11ac0d487827 | 19 | 59097579  | 59098153  | 8  | 574   | 1  | 6  | 1  | NA | NA | NA |
| Prost-AdenoCA | 0c0038ff-6cc4-b0b0-e050-11ac0d483d73 | 1  | 219182955 | 219186381 | 7  | 3426  | NA | 4  | 3  | NA | NA | NA |
| Prost-AdenoCA | 0c0038ff-6cc4-b0b0-e050-11ac0d483d73 | 2  | 132370918 | 132374883 | 14 | 3965  | 1  | 6  | 6  | NA | NA | 1  |

|                 |                                      |    |           |           |    |      |    |    |    |    |    |    |
|-----------------|--------------------------------------|----|-----------|-----------|----|------|----|----|----|----|----|----|
| Prost-AdenoCA   | 0c0038ff-6cc4-b0b0-e050-11ac0d483d73 | 2  | 132986596 | 132989033 | 7  | 2437 | 1  | 6  | NA | NA | NA | NA |
| Prost-AdenoCA   | 0c0038ff-6cc4-b0b0-e050-11ac0d483d73 | 2  | 138045866 | 138050977 | 7  | 5111 | NA | 3  | 4  | NA | NA | NA |
| Prost-AdenoCA   | 0c0038ff-6cc4-b0b0-e050-11ac0d483d73 | 2  | 138059516 | 138064457 | 7  | 4941 | NA | 4  | 3  | NA | NA | NA |
| Prost-AdenoCA   | 0c0038ff-6cc4-b0b0-e050-11ac0d483d73 | 2  | 138489812 | 138490949 | 9  | 1137 | NA | 5  | 4  | NA | NA | NA |
| Prost-AdenoCA   | 0c0038ff-6cc4-b0b0-e050-11ac0d483d73 | 4  | 108530561 | 108531085 | 11 | 524  | NA | NA | 11 | NA | NA | NA |
| Prost-AdenoCA   | 0c0038ff-6cc4-b0b0-e050-11ac0d483d73 | 6  | 118517440 | 118526547 | 18 | 9107 | NA | 14 | 4  | NA | NA | NA |
| Prost-AdenoCA   | 0c0038ff-6cc4-b0b0-e050-11ac0d483d73 | 8  | 39915996  | 39917101  | 8  | 1105 | 1  | 2  | 5  | NA | NA | NA |
| Prost-AdenoCA   | 0c0038ff-6cc4-b0b0-e050-11ac0d483d73 | 8  | 39953854  | 39963547  | 15 | 9693 | 1  | 7  | 7  | NA | NA | NA |
| Prost-AdenoCA   | 0c0038ff-6cc4-b0b0-e050-11ac0d483d73 | 10 | 55166305  | 55167516  | 19 | 1211 | NA | 5  | 14 | NA | NA | NA |
| Prost-AdenoCA   | 0c0038ff-6cc4-b0b0-e050-11ac0d483d73 | X  | 72829542  | 72832540  | 6  | 2998 | 1  | 2  | 3  | NA | NA | NA |
| Prost-AdenoCA   | 0c0038ff-6cc4-b0b0-e050-11ac0d483d73 | X  | 73024842  | 73025076  | 8  | 234  | NA | 2  | 6  | NA | NA | NA |
| Prost-AdenoCA   | 0c0038ff-6cc6-b0b0-e050-11ac0d483d73 | 1  | 219182955 | 219186381 | 7  | 3426 | NA | 4  | 3  | NA | NA | NA |
| Prost-AdenoCA   | 0c0038ff-6cc6-b0b0-e050-11ac0d483d73 | 2  | 132370918 | 132372756 | 13 | 1838 | 1  | 6  | 6  | NA | NA | NA |
| Prost-AdenoCA   | 0c0038ff-6cc6-b0b0-e050-11ac0d483d73 | 2  | 132986596 | 132990709 | 8  | 4113 | 2  | 6  | NA | NA | NA | NA |
| Prost-AdenoCA   | 0c0038ff-6cc6-b0b0-e050-11ac0d483d73 | 2  | 138045866 | 138050977 | 7  | 5111 | NA | 3  | 4  | NA | NA | NA |
| Prost-AdenoCA   | 0c0038ff-6cc6-b0b0-e050-11ac0d483d73 | 2  | 138057584 | 138064457 | 9  | 6873 | 1  | 5  | 3  | NA | NA | NA |
| Prost-AdenoCA   | 0c0038ff-6cc6-b0b0-e050-11ac0d483d73 | 2  | 138489812 | 138490949 | 9  | 1137 | NA | 5  | 4  | NA | NA | NA |
| Prost-AdenoCA   | 0c0038ff-6cc6-b0b0-e050-11ac0d483d73 | 4  | 108530561 | 108531085 | 11 | 524  | NA | NA | 11 | NA | NA | NA |
| Prost-AdenoCA   | 0c0038ff-6cc6-b0b0-e050-11ac0d483d73 | 6  | 118517440 | 118526547 | 17 | 9107 | NA | 13 | 4  | NA | NA | NA |
| Prost-AdenoCA   | 0c0038ff-6cc6-b0b0-e050-11ac0d483d73 | 8  | 39915996  | 39917101  | 8  | 1105 | 1  | 2  | 5  | NA | NA | NA |
| Prost-AdenoCA   | 0c0038ff-6cc6-b0b0-e050-11ac0d483d73 | 8  | 39953854  | 39963547  | 14 | 9693 | 1  | 5  | 8  | NA | NA | NA |
| Prost-AdenoCA   | 0c0038ff-6cc6-b0b0-e050-11ac0d483d73 | 10 | 55166305  | 55167516  | 19 | 1211 | NA | 5  | 14 | NA | NA | NA |
| Prost-AdenoCA   | 0c0038ff-6cc6-b0b0-e050-11ac0d483d73 | X  | 72829542  | 72832540  | 6  | 2998 | 1  | 2  | 3  | NA | NA | NA |
| Prost-AdenoCA   | 0c0038ff-6cc6-b0b0-e050-11ac0d483d73 | X  | 73024842  | 73025076  | 8  | 234  | NA | 2  | 6  | NA | NA | NA |
| Prost-AdenoCA   | 0c0038ff-6cc8-b0b0-e050-11ac0d483d73 | 7  | 113961488 | 113963382 | 8  | 1894 | 1  | 1  | 6  | NA | NA | NA |
| Prost-AdenoCA   | 0c0038ff-6cc8-b0b0-e050-11ac0d483d73 | 7  | 114050280 | 114052288 | 7  | 2008 | NA | NA | 7  | NA | NA | NA |
| Prost-AdenoCA   | 0c0038ff-6cc8-b0b0-e050-11ac0d483d73 | 8  | 56634262  | 56638657  | 20 | 4395 | 2  | 9  | 9  | NA | NA | NA |
| Prost-AdenoCA   | 0c0038ff-6cc8-b0b0-e050-11ac0d483d73 | 8  | 56694956  | 56695349  | 7  | 393  | 1  | 2  | 4  | NA | NA | NA |
| Prost-AdenoCA   | 0c0038ff-6cc8-b0b0-e050-11ac0d483d73 | 8  | 124281863 | 124286833 | 18 | 4970 | 4  | 7  | 7  | NA | NA | NA |
| Prost-AdenoCA   | 0c0038ff-6cc8-b0b0-e050-11ac0d483d73 | 10 | 34496955  | 34498368  | 17 | 1413 | NA | 11 | 6  | NA | NA | NA |
| Prost-AdenoCA   | 0c0038ff-6cc8-b0b0-e050-11ac0d483d73 | 19 | 59097579  | 59098153  | 8  | 574  | 1  | 6  | 1  | NA | NA | NA |
| Bladder-TCC     | 0c7aca3f-e006-4de3-afc2-20b4f727d4fd | 1  | 16648839  | 16651089  | 6  | 2250 | 1  | 3  | 1  | 1  | NA | NA |
| Bladder-TCC     | 0c7aca3f-e006-4de3-afc2-20b4f727d4fd | 1  | 178763849 | 178766013 | 8  | 2164 | NA | 2  | 6  | NA | NA | NA |
| Bladder-TCC     | 0c7aca3f-e006-4de3-afc2-20b4f727d4fd | 2  | 112917212 | 112920033 | 6  | 2821 | 1  | 2  | 3  | NA | NA | NA |
| Bladder-TCC     | 0c7aca3f-e006-4de3-afc2-20b4f727d4fd | 3  | 3202801   | 3207062   | 11 | 4261 | 1  | 3  | 7  | NA | NA | NA |
| Bladder-TCC     | 0c7aca3f-e006-4de3-afc2-20b4f727d4fd | 3  | 26951379  | 26952907  | 7  | 1528 | NA | 1  | 6  | NA | NA | NA |
| Bladder-TCC     | 0c7aca3f-e006-4de3-afc2-20b4f727d4fd | 3  | 187206686 | 187210432 | 9  | 3746 | 2  | 2  | 5  | NA | NA | NA |
| Bladder-TCC     | 0c7aca3f-e006-4de3-afc2-20b4f727d4fd | 6  | 47239033  | 47244651  | 7  | 5618 | 3  | NA | 4  | NA | NA | NA |
| Bladder-TCC     | 0c7aca3f-e006-4de3-afc2-20b4f727d4fd | 7  | 128618249 | 128622469 | 9  | 4220 | 1  | NA | 8  | NA | NA | NA |
| Bladder-TCC     | 0c7aca3f-e006-4de3-afc2-20b4f727d4fd | 9  | 100270264 | 100271853 | 8  | 1589 | NA | 3  | 5  | NA | NA | NA |
| Bladder-TCC     | 0c7aca3f-e006-4de3-afc2-20b4f727d4fd | 10 | 65178946  | 65181938  | 7  | 2992 | 1  | 4  | 2  | NA | NA | NA |
| Bladder-TCC     | 0c7aca3f-e006-4de3-afc2-20b4f727d4fd | 10 | 101986228 | 101991056 | 11 | 4828 | 1  | 9  | 1  | NA | NA | NA |
| Bladder-TCC     | 0c7aca3f-e006-4de3-afc2-20b4f727d4fd | 11 | 65920792  | 65923365  | 9  | 2573 | NA | 5  | 3  | NA | NA | 1  |
| Bladder-TCC     | 0c7aca3f-e006-4de3-afc2-20b4f727d4fd | 11 | 71103642  | 71106531  | 19 | 2889 | NA | 6  | 12 | 1  | NA | NA |
| Bladder-TCC     | 0c7aca3f-e006-4de3-afc2-20b4f727d4fd | 12 | 46764010  | 46765071  | 6  | 1061 | NA | 6  | NA | NA | NA | NA |
| Bladder-TCC     | 0c7aca3f-e006-4de3-afc2-20b4f727d4fd | 13 | 31326918  | 31330656  | 11 | 3738 | 3  | 3  | 5  | NA | NA | NA |
| Bladder-TCC     | 0c7aca3f-e006-4de3-afc2-20b4f727d4fd | 15 | 90906775  | 90910099  | 6  | 3324 | NA | 5  | 1  | NA | NA | NA |
| Bladder-TCC     | 0c7aca3f-e006-4de3-afc2-20b4f727d4fd | 16 | 1052634   | 1055158   | 6  | 2524 | 1  | 2  | 3  | NA | NA | NA |
| Bladder-TCC     | 0c7aca3f-e006-4de3-afc2-20b4f727d4fd | 16 | 85619102  | 85621599  | 8  | 2497 | 2  | 3  | 3  | NA | NA | NA |
| Bladder-TCC     | 0c7aca3f-e006-4de3-afc2-20b4f727d4fd | 18 | 52946123  | 52948914  | 13 | 2791 | 2  | 8  | 3  | NA | NA | NA |
| Bladder-TCC     | 0c7aca3f-e006-4de3-afc2-20b4f727d4fd | 18 | 59379242  | 59381646  | 7  | 2404 | 1  | 3  | 2  | NA | NA | 1  |
| Bladder-TCC     | 0c7aca3f-e006-4de3-afc2-20b4f727d4fd | 19 | 19617561  | 19622695  | 10 | 5134 | 1  | NA | 9  | NA | NA | NA |
| Bladder-TCC     | 0c7aca3f-e006-4de3-afc2-20b4f727d4fd | 20 | 12949102  | 12951104  | 6  | 2002 | 1  | 2  | 3  | NA | NA | NA |
| Bladder-TCC     | 0c7aca3f-e006-4de3-afc2-20b4f727d4fd | 21 | 32579158  | 32582672  | 6  | 3514 | 1  | 1  | 4  | NA | NA | NA |
| Bladder-TCC     | 0c7aca3f-e006-4de3-afc2-20b4f727d4fd | 22 | 18434413  | 18438631  | 6  | 4218 | 1  | 3  | 2  | NA | NA | NA |
| Bladder-TCC     | 0c7aca3f-e006-4de3-afc2-20b4f727d4fd | X  | 75959127  | 75963280  | 6  | 4153 | NA | 2  | 4  | NA | NA | NA |
| Stomach-AdenoCA | 0cd60b96-eb2d-4687-9709-d1455ec45de7 | 8  | 11694501  | 11695640  | 12 | 1139 | 1  | 6  | 5  | NA | NA | NA |
| Liver-HCC       | 0cdbabf2-c623-11e3-bf01-24c6515278c0 | 6  | 136357456 | 136362068 | 17 | 4612 | 2  | 12 | 3  | NA | NA | NA |
| Liver-HCC       | 0cdbabf2-c623-11e3-bf01-24c6515278c0 | 8  | 41893303  | 41895146  | 7  | 1843 | NA | 3  | 4  | NA | NA | NA |
| Panc-AdenoCA    | 0cf9bbc2-cbd5-4b64-8d90-cfa416307b39 | 6  | 62763065  | 62763663  | 6  | 598  | NA | 4  | 2  | NA | NA | NA |



|              |                                      |    |           |           |    |       |    |    |    |    |    |    |
|--------------|--------------------------------------|----|-----------|-----------|----|-------|----|----|----|----|----|----|
| Panc-AdenoCA | 0cf9bbc2-cbd5-4b64-8d90-cfa416307b39 | 8  | 96506693  | 96507676  | 8  | 983   | NA | 6  | 2  | NA | NA | NA |
| Panc-AdenoCA | 0cf9bbc2-cbd5-4b64-8d90-cfa416307b39 | 19 | 22379099  | 22379760  | 7  | 661   | 1  | 5  | 1  | NA | NA | NA |
| Panc-AdenoCA | 0cf9bbc2-cbd5-4b64-8d90-cfa416307b39 | 19 | 32409334  | 32409525  | 8  | 191   | NA | 3  | 5  | NA | NA | NA |
| Liver-HCC    | 0d259ac2-03d1-4814-9b0b-d05e3a6029b7 | 3  | 107503487 | 107505309 | 6  | 1822  | 1  | 4  | 1  | NA | NA | NA |
| Liver-HCC    | 0d259ac2-03d1-4814-9b0b-d05e3a6029b7 | 5  | 40310838  | 40314144  | 6  | 3306  | 1  | 5  | NA | NA | NA | NA |
| Liver-HCC    | 0d259ac2-03d1-4814-9b0b-d05e3a6029b7 | 8  | 40898211  | 40898786  | 6  | 575   | NA | 3  | 3  | NA | NA | NA |
| Lymph-BNHL   | 0d569bd5-418d-4d72-87ca-8e14668c2119 | 1  | 2449065   | 2453446   | 6  | 4381  | 1  | NA | 2  | 1  | NA | 2  |
| Lymph-BNHL   | 0d569bd5-418d-4d72-87ca-8e14668c2119 | 1  | 2467547   | 2480394   | 16 | 12847 | 3  | 2  | 4  | 2  | 3  | 2  |
| Lymph-BNHL   | 0d569bd5-418d-4d72-87ca-8e14668c2119 | 1  | 188300293 | 188305466 | 7  | 5173  | NA | 3  | NA | 2  | 2  | NA |
| Lymph-BNHL   | 0d569bd5-418d-4d72-87ca-8e14668c2119 | 2  | 5262970   | 5267621   | 6  | 4651  | NA | NA | NA | 1  | 3  | 2  |
| Lymph-BNHL   | 0d569bd5-418d-4d72-87ca-8e14668c2119 | 2  | 89157326  | 89158953  | 48 | 1627  | 2  | 7  | 6  | 13 | 12 | 8  |
| Lymph-BNHL   | 0d569bd5-418d-4d72-87ca-8e14668c2119 | 2  | 176480744 | 176486936 | 9  | 6192  | 1  | 3  | NA | 1  | 2  | 2  |
| Lymph-BNHL   | 0d569bd5-418d-4d72-87ca-8e14668c2119 | 3  | 25702005  | 25703685  | 6  | 1680  | NA | NA | NA | 5  | NA | 1  |
| Lymph-BNHL   | 0d569bd5-418d-4d72-87ca-8e14668c2119 | 3  | 41228028  | 41231155  | 8  | 3127  | NA | NA | 2  | NA | 4  | 2  |
| Lymph-BNHL   | 0d569bd5-418d-4d72-87ca-8e14668c2119 | 3  | 60463330  | 60468638  | 7  | 5308  | 2  | NA | NA | 3  | 1  | 1  |
| Lymph-BNHL   | 0d569bd5-418d-4d72-87ca-8e14668c2119 | 3  | 60884163  | 60888844  | 7  | 4681  | NA | NA | 1  | 1  | 2  | 3  |
| Lymph-BNHL   | 0d569bd5-418d-4d72-87ca-8e14668c2119 | 3  | 186783598 | 186783821 | 7  | 223   | 1  | NA | NA | 1  | 2  | 3  |
| Lymph-BNHL   | 0d569bd5-418d-4d72-87ca-8e14668c2119 | 3  | 187461546 | 187464117 | 9  | 2571  | 2  | NA | NA | 4  | 2  | 1  |
| Lymph-BNHL   | 0d569bd5-418d-4d72-87ca-8e14668c2119 | 4  | 34133620  | 34136966  | 7  | 3346  | NA | NA | NA | NA | 3  | 4  |
| Lymph-BNHL   | 0d569bd5-418d-4d72-87ca-8e14668c2119 | 4  | 43486828  | 43491690  | 7  | 4862  | NA | NA | NA | 1  | 3  | 3  |
| Lymph-BNHL   | 0d569bd5-418d-4d72-87ca-8e14668c2119 | 4  | 66826996  | 66839626  | 16 | 12630 | NA | 2  | 1  | 9  | 2  | 2  |
| Lymph-BNHL   | 0d569bd5-418d-4d72-87ca-8e14668c2119 | 4  | 84727956  | 84731479  | 7  | 3523  | NA | NA | NA | 3  | 3  | 1  |
| Lymph-BNHL   | 0d569bd5-418d-4d72-87ca-8e14668c2119 | 4  | 135486444 | 135491889 | 11 | 5445  | NA | 2  | 1  | 3  | 2  | 3  |
| Lymph-BNHL   | 0d569bd5-418d-4d72-87ca-8e14668c2119 | 5  | 4886312   | 4891096   | 6  | 4784  | NA | 2  | NA | 3  | 1  | NA |
| Lymph-BNHL   | 0d569bd5-418d-4d72-87ca-8e14668c2119 | 5  | 4892446   | 4898169   | 8  | 5723  | 2  | 1  | 1  | 3  | NA | 1  |
| Lymph-BNHL   | 0d569bd5-418d-4d72-87ca-8e14668c2119 | 5  | 22291717  | 22297460  | 9  | 5743  | 1  | NA | 3  | 1  | 2  | 2  |
| Lymph-BNHL   | 0d569bd5-418d-4d72-87ca-8e14668c2119 | 6  | 91004064  | 91006412  | 7  | 2348  | NA | 2  | 3  | NA | 1  | 1  |
| Lymph-BNHL   | 0d569bd5-418d-4d72-87ca-8e14668c2119 | 7  | 95339560  | 95344012  | 6  | 4452  | NA | NA | 2  | 1  | 1  | 2  |
| Lymph-BNHL   | 0d569bd5-418d-4d72-87ca-8e14668c2119 | 7  | 109584395 | 109589824 | 7  | 5429  | NA | NA | 1  | 3  | 1  | 2  |
| Lymph-BNHL   | 0d569bd5-418d-4d72-87ca-8e14668c2119 | 7  | 110637148 | 110668764 | 35 | 31616 | 3  | 2  | 2  | 12 | 6  | 10 |
| Lymph-BNHL   | 0d569bd5-418d-4d72-87ca-8e14668c2119 | 7  | 110676169 | 110681830 | 7  | 5661  | NA | 1  | 1  | 2  | NA | 3  |
| Lymph-BNHL   | 0d569bd5-418d-4d72-87ca-8e14668c2119 | 7  | 110687136 | 110693151 | 8  | 6015  | 1  | 2  | NA | 4  | NA | 1  |
| Lymph-BNHL   | 0d569bd5-418d-4d72-87ca-8e14668c2119 | 7  | 110708519 | 110763581 | 57 | 55062 | 4  | 4  | 2  | 21 | 9  | 17 |
| Lymph-BNHL   | 0d569bd5-418d-4d72-87ca-8e14668c2119 | 7  | 110768453 | 110773878 | 10 | 5425  | 1  | 2  | 2  | 2  | NA | 3  |
| Lymph-BNHL   | 0d569bd5-418d-4d72-87ca-8e14668c2119 | 7  | 110801384 | 110821793 | 25 | 20409 | 1  | NA | 4  | 7  | 6  | 7  |
| Lymph-BNHL   | 0d569bd5-418d-4d72-87ca-8e14668c2119 | 7  | 110832534 | 110837002 | 8  | 4468  | NA | NA | 1  | 2  | NA | 5  |
| Lymph-BNHL   | 0d569bd5-418d-4d72-87ca-8e14668c2119 | 7  | 110935445 | 110938143 | 7  | 2698  | NA | NA | NA | 3  | 2  | 2  |
| Lymph-BNHL   | 0d569bd5-418d-4d72-87ca-8e14668c2119 | 7  | 118252007 | 118260759 | 10 | 8752  | NA | 1  | 2  | 2  | 2  | 3  |
| Lymph-BNHL   | 0d569bd5-418d-4d72-87ca-8e14668c2119 | 7  | 132991418 | 132996745 | 7  | 5327  | NA | NA | NA | 1  | 3  | 3  |
| Lymph-BNHL   | 0d569bd5-418d-4d72-87ca-8e14668c2119 | 7  | 133090017 | 133092615 | 13 | 2598  | NA | 1  | NA | 7  | 2  | 3  |
| Lymph-BNHL   | 0d569bd5-418d-4d72-87ca-8e14668c2119 | 8  | 11352385  | 11356695  | 6  | 4310  | 1  | NA | NA | 4  | NA | 1  |
| Lymph-BNHL   | 0d569bd5-418d-4d72-87ca-8e14668c2119 | 8  | 16652646  | 16656506  | 7  | 3860  | 1  | 1  | 1  | 2  | 1  | 1  |
| Lymph-BNHL   | 0d569bd5-418d-4d72-87ca-8e14668c2119 | 8  | 88402804  | 88408284  | 8  | 5480  | NA | 2  | 1  | 5  | NA | NA |
| Lymph-BNHL   | 0d569bd5-418d-4d72-87ca-8e14668c2119 | 8  | 141866765 | 141878075 | 14 | 11310 | NA | NA | NA | 6  | 6  | 2  |
| Lymph-BNHL   | 0d569bd5-418d-4d72-87ca-8e14668c2119 | 9  | 9161558   | 9167018   | 7  | 5460  | NA | NA | NA | 3  | 3  | 1  |
| Lymph-BNHL   | 0d569bd5-418d-4d72-87ca-8e14668c2119 | 9  | 12310896  | 12313803  | 7  | 2907  | 2  | 1  | NA | 3  | NA | 1  |
| Lymph-BNHL   | 0d569bd5-418d-4d72-87ca-8e14668c2119 | 9  | 18458834  | 18466547  | 9  | 7713  | 1  | 1  | NA | 2  | 1  | 4  |
| Lymph-BNHL   | 0d569bd5-418d-4d72-87ca-8e14668c2119 | 9  | 23926204  | 23934147  | 10 | 7943  | 1  | 1  | NA | 2  | 3  | 3  |
| Lymph-BNHL   | 0d569bd5-418d-4d72-87ca-8e14668c2119 | 9  | 23950962  | 23959164  | 11 | 8202  | NA | NA | 1  | 3  | NA | 7  |
| Lymph-BNHL   | 0d569bd5-418d-4d72-87ca-8e14668c2119 | 9  | 28249139  | 28249709  | 7  | 570   | NA | NA | NA | 4  | 2  | 1  |
| Lymph-BNHL   | 0d569bd5-418d-4d72-87ca-8e14668c2119 | 9  | 105642527 | 105661639 | 24 | 19112 | 1  | 3  | 2  | 10 | 5  | 3  |
| Lymph-BNHL   | 0d569bd5-418d-4d72-87ca-8e14668c2119 | 10 | 130842954 | 130855529 | 15 | 12575 | 1  | 1  | 3  | 5  | 3  | 2  |
| Lymph-BNHL   | 0d569bd5-418d-4d72-87ca-8e14668c2119 | 11 | 17145272  | 17153595  | 10 | 8323  | NA | 1  | NA | 2  | 4  | 3  |
| Lymph-BNHL   | 0d569bd5-418d-4d72-87ca-8e14668c2119 | 11 | 40525600  | 40538248  | 23 | 12648 | 1  | 1  | 3  | 8  | 5  | 5  |
| Lymph-BNHL   | 0d569bd5-418d-4d72-87ca-8e14668c2119 | 11 | 41315479  | 41318779  | 11 | 3300  | 1  | NA | 2  | 3  | 4  | 1  |
| Lymph-BNHL   | 0d569bd5-418d-4d72-87ca-8e14668c2119 | 12 | 122458286 | 122463179 | 21 | 4893  | 1  | 4  | 9  | 4  | 2  | 1  |
| Lymph-BNHL   | 0d569bd5-418d-4d72-87ca-8e14668c2119 | 13 | 77664704  | 77667060  | 6  | 2356  | NA | NA | 1  | 1  | 3  | 1  |
| Lymph-BNHL   | 0d569bd5-418d-4d72-87ca-8e14668c2119 | 13 | 81755261  | 81763765  | 13 | 8504  | NA | 1  | NA | 4  | 4  | 4  |
| Lymph-BNHL   | 0d569bd5-418d-4d72-87ca-8e14668c2119 | 13 | 94486467  | 94493700  | 11 | 7233  | 2  | NA | NA | 3  | 6  | NA |
| Lymph-BNHL   | 0d569bd5-418d-4d72-87ca-8e14668c2119 | 14 | 31273523  | 31281437  | 14 | 7914  | 1  | 2  | 2  | 2  | 4  | 3  |

|                  |                                      |    |           |           |     |       |    |    |    |    |    |    |
|------------------|--------------------------------------|----|-----------|-----------|-----|-------|----|----|----|----|----|----|
| Lymph-BNHL       | 0d569bd5-418d-4d72-87ca-8e14668c2119 | 14 | 58700714  | 58711048  | 12  | 10334 | 2  | 2  | NA | 1  | 3  | 4  |
| Lymph-BNHL       | 0d569bd5-418d-4d72-87ca-8e14668c2119 | 14 | 106112658 | 106114619 | 16  | 1961  | 3  | 1  | 12 | NA | NA | NA |
| Lymph-BNHL       | 0d569bd5-418d-4d72-87ca-8e14668c2119 | 14 | 106161269 | 106165735 | 8   | 4466  | 1  | 1  | 1  | 1  | 4  | NA |
| Lymph-BNHL       | 0d569bd5-418d-4d72-87ca-8e14668c2119 | 14 | 106210750 | 106213808 | 28  | 3058  | 2  | 6  | 19 | NA | NA | 1  |
| Lymph-BNHL       | 0d569bd5-418d-4d72-87ca-8e14668c2119 | 14 | 106240210 | 106240734 | 9   | 524   | 1  | 1  | 7  | NA | NA | NA |
| Lymph-BNHL       | 0d569bd5-418d-4d72-87ca-8e14668c2119 | 14 | 106321417 | 106329280 | 83  | 7863  | 4  | 12 | 9  | 17 | 23 | 18 |
| Lymph-BNHL       | 0d569bd5-418d-4d72-87ca-8e14668c2119 | 14 | 106816695 | 106821145 | 12  | 4450  | 1  | 1  | 2  | 4  | 2  | 2  |
| Lymph-BNHL       | 0d569bd5-418d-4d72-87ca-8e14668c2119 | 14 | 107176430 | 107179030 | 7   | 2600  | NA | 2  | 1  | 2  | 1  | 1  |
| Lymph-BNHL       | 0d569bd5-418d-4d72-87ca-8e14668c2119 | 17 | 7537920   | 7542713   | 7   | 4793  | NA | NA | 3  | 1  | NA | 3  |
| Lymph-BNHL       | 0d569bd5-418d-4d72-87ca-8e14668c2119 | 17 | 30956909  | 30959811  | 9   | 2902  | NA | NA | 1  | 3  | 3  | 2  |
| Lymph-BNHL       | 0d569bd5-418d-4d72-87ca-8e14668c2119 | 18 | 60983089  | 60988652  | 39  | 5563  | 1  | 8  | 7  | 13 | 5  | 5  |
| Lymph-BNHL       | 0d569bd5-418d-4d72-87ca-8e14668c2119 | 18 | 71968363  | 71978715  | 15  | 10352 | 1  | 2  | NA | 8  | 3  | 1  |
| Lymph-BNHL       | 0d569bd5-418d-4d72-87ca-8e14668c2119 | 19 | 32278547  | 32282380  | 6   | 3833  | 1  | NA | NA | 1  | 2  | 2  |
| Lymph-BNHL       | 0d569bd5-418d-4d72-87ca-8e14668c2119 | 20 | 10893290  | 10898531  | 10  | 5241  | NA | NA | 2  | 2  | 5  | 1  |
| Lymph-BNHL       | 0d569bd5-418d-4d72-87ca-8e14668c2119 | 20 | 46229035  | 46233233  | 8   | 4198  | NA | NA | 3  | 1  | NA | 4  |
| Lymph-BNHL       | 0d569bd5-418d-4d72-87ca-8e14668c2119 | 21 | 31923889  | 31934449  | 15  | 10560 | 2  | NA | 4  | 1  | 2  | 6  |
| Lymph-BNHL       | 0d569bd5-418d-4d72-87ca-8e14668c2119 | 22 | 22378218  | 22453249  | 186 | 75031 | 5  | 31 | 42 | 64 | 19 | 25 |
| Lymph-BNHL       | 0d569bd5-418d-4d72-87ca-8e14668c2119 | 22 | 23236057  | 23282642  | 50  | 46585 | 3  | 12 | 21 | 5  | 6  | 3  |
| Lymph-BNHL       | 0d569bd5-418d-4d72-87ca-8e14668c2119 | X  | 9334760   | 9337785   | 7   | 3025  | NA | 1  | 3  | 1  | 1  | 1  |
| Lymph-BNHL       | 0d569bd5-418d-4d72-87ca-8e14668c2119 | X  | 84541826  | 84547373  | 8   | 5547  | 1  | NA | 1  | 3  | 1  | 2  |
| Lymph-BNHL       | 0d569bd5-418d-4d72-87ca-8e14668c2119 | X  | 133376801 | 133384653 | 9   | 7852  | NA | 1  | NA | 1  | 3  | 4  |
| Lymph-BNHL       | 0d569bd5-418d-4d72-87ca-8e14668c2119 | X  | 143931182 | 143935712 | 7   | 4530  | NA | NA | NA | 3  | 3  | 1  |
| Stomach-AdenoCA  | 0e54cea2-d568-4a33-b9db-b698844e6ad9 | 17 | 37867750  | 37869367  | 15  | 1617  | 1  | 5  | 9  | NA | NA | NA |
| Ovary-AdenoCA    | 0ead45d8-d785-4404-8319-2ef951e02e03 | 11 | 66446232  | 66447730  | 6   | 1498  | NA | 1  | 1  | 4  | NA | NA |
| Eso-AdenoCa      | 0ef92ff8-829f-425a-91d8-c594b6e22a2b | 1  | 199269400 | 199270805 | 6   | 1405  | NA | NA | NA | 4  | NA | 2  |
| Eso-AdenoCa      | 0ef92ff8-829f-425a-91d8-c594b6e22a2b | 11 | 104354509 | 104358297 | 6   | 3788  | NA | NA | NA | 1  | 2  | 3  |
| Eso-AdenoCa      | 0ef92ff8-829f-425a-91d8-c594b6e22a2b | 13 | 71046975  | 71057552  | 14  | 10577 | NA | NA | 2  | 1  | 2  | 9  |
| Eso-AdenoCa      | 0ef92ff8-829f-425a-91d8-c594b6e22a2b | 13 | 71061009  | 71064081  | 9   | 3072  | NA | NA | NA | 3  | 3  | 3  |
| Eso-AdenoCa      | 0ef92ff8-829f-425a-91d8-c594b6e22a2b | X  | 39911507  | 39918894  | 23  | 7387  | 4  | 9  | 10 | NA | NA | NA |
| Panc-AdenoCA     | 0efee3f3-313b-44eb-b3b0-af975a1ded82 | 1  | 110179072 | 110179215 | 6   | 143   | 2  | NA | 4  | NA | NA | NA |
| Panc-AdenoCA     | 0efee3f3-313b-44eb-b3b0-af975a1ded82 | 1  | 111297628 | 111297854 | 11  | 226   | NA | NA | 11 | NA | NA | NA |
| Panc-AdenoCA     | 0efee3f3-313b-44eb-b3b0-af975a1ded82 | 1  | 238070699 | 238072367 | 35  | 1668  | NA | NA | 35 | NA | NA | NA |
| Panc-AdenoCA     | 0efee3f3-313b-44eb-b3b0-af975a1ded82 | 1  | 245589429 | 245593983 | 16  | 4554  | NA | 4  | 10 | NA | NA | 2  |
| Kidney-RCC       | 0f53e757-1823-409f-a0ea-249270728e15 | 7  | 7145424   | 7147397   | 9   | 1973  | 3  | 2  | 3  | NA | 1  | NA |
| Kidney-RCC       | 0f53e757-1823-409f-a0ea-249270728e15 | 7  | 88812972  | 88817807  | 17  | 4835  | 4  | 6  | 3  | 1  | 1  | 2  |
| Kidney-RCC       | 0f53e757-1823-409f-a0ea-249270728e15 | 7  | 98439626  | 98440838  | 12  | 1212  | 1  | 7  | 3  | NA | NA | 1  |
| Kidney-RCC       | 0f53e757-1823-409f-a0ea-249270728e15 | 7  | 111355998 | 111359289 | 20  | 3291  | 6  | 7  | 6  | NA | 1  | NA |
| Head-SCC         | 0f9e70b3-24cf-4d76-af7b-84ace66ec5a7 | 1  | 45060640  | 45065379  | 16  | 4739  | 3  | 4  | 7  | 2  | NA | NA |
| Head-SCC         | 0f9e70b3-24cf-4d76-af7b-84ace66ec5a7 | 3  | 161992358 | 161994626 | 12  | 2268  | NA | 4  | 8  | NA | NA | NA |
| Head-SCC         | 0f9e70b3-24cf-4d76-af7b-84ace66ec5a7 | 3  | 162434141 | 162440275 | 12  | 6134  | 2  | 4  | 6  | NA | NA | NA |
| Head-SCC         | 0f9e70b3-24cf-4d76-af7b-84ace66ec5a7 | 8  | 35853286  | 35853631  | 8   | 345   | 1  | 1  | 6  | NA | NA | NA |
| Head-SCC         | 0f9e70b3-24cf-4d76-af7b-84ace66ec5a7 | 16 | 1780489   | 1782305   | 10  | 1816  | 3  | 3  | 4  | NA | NA | NA |
| Head-SCC         | 0f9e70b3-24cf-4d76-af7b-84ace66ec5a7 | 16 | 26538242  | 26539116  | 10  | 874   | 1  | 2  | 7  | NA | NA | NA |
| Head-SCC         | 0f9e70b3-24cf-4d76-af7b-84ace66ec5a7 | 17 | 79269706  | 79274386  | 10  | 4680  | 2  | 2  | 6  | NA | NA | NA |
| Stomach-AdenoCA  | 0fa9cfba-0f49-47d0-ab54-9dd2144e0a73 | 2  | 24734595  | 24736599  | 7   | 2004  | 2  | 3  | 2  | NA | NA | NA |
| Stomach-AdenoCA  | 0fa9cfba-0f49-47d0-ab54-9dd2144e0a73 | 4  | 100961248 | 100962924 | 6   | 1676  | NA | 4  | 2  | NA | NA | NA |
| Stomach-AdenoCA  | 0fa9cfba-0f49-47d0-ab54-9dd2144e0a73 | 13 | 100287406 | 100294370 | 38  | 6964  | 3  | 20 | 15 | NA | NA | NA |
| Stomach-AdenoCA  | 0fa9cfba-0f49-47d0-ab54-9dd2144e0a73 | 13 | 108700009 | 108700464 | 7   | 455   | NA | NA | 7  | NA | NA | NA |
| Stomach-AdenoCA  | 0fa9cfba-0f49-47d0-ab54-9dd2144e0a73 | 13 | 108707066 | 108707753 | 14  | 687   | 3  | 4  | 7  | NA | NA | NA |
| Panc-AdenoCA     | 0fbd94b1-bb34-4620-841b-861a0b5e0c12 | 3  | 6328685   | 6329091   | 6   | 406   | NA | NA | 1  | 2  | 1  | 2  |
| Panc-AdenoCA     | 0fbd94b1-bb34-4620-841b-861a0b5e0c12 | 7  | 98397577  | 98398131  | 7   | 554   | 1  | NA | 6  | NA | NA | NA |
| Panc-AdenoCA     | 0fbd94b1-bb34-4620-841b-861a0b5e0c12 | 8  | 37732021  | 37735008  | 12  | 2987  | 5  | 4  | 3  | NA | NA | NA |
| Panc-AdenoCA     | 0fbd94b1-bb34-4620-841b-861a0b5e0c12 | 16 | 32614030  | 32620562  | 9   | 6532  | NA | 2  | NA | NA | 3  | 4  |
| Panc-AdenoCA     | 0fc63b79-7fff-441d-88fc-922d53c787ab | 7  | 37328872  | 37329953  | 10  | 1081  | 1  | 3  | 6  | NA | NA | NA |
| Panc-AdenoCA     | 0fc63b79-7fff-441d-88fc-922d53c787ab | 8  | 92700844  | 92702647  | 10  | 1803  | 2  | 4  | 4  | NA | NA | NA |
| Panc-AdenoCA     | 0fc63b79-7fff-441d-88fc-922d53c787ab | 17 | 25445093  | 25446464  | 8   | 1371  | 1  | 4  | 3  | NA | NA | NA |
| Uterus-AdenoCA   | 105a51c4-cc7e-4d0f-9cf8-e4d64a31d14d | 2  | 18924549  | 18926086  | 11  | 1537  | 3  | 3  | 5  | NA | NA | NA |
| Uterus-AdenoCA   | 105a51c4-cc7e-4d0f-9cf8-e4d64a31d14d | 3  | 172207865 | 172208401 | 7   | 536   | NA | 3  | 3  | NA | 1  | NA |
| ColoRect-AdenoCA | 10ad692b-4c3d-42de-9b5e-4968441388b3 | 4  | 119941502 | 119942794 | 6   | 1292  | 2  | 4  | NA | NA | NA | NA |
| ColoRect-AdenoCA | 10ad692b-4c3d-42de-9b5e-4968441388b3 | 17 | 79636688  | 79636705  | 6   | 17    | 1  | 1  | 3  | NA | 1  | NA |

|                |                                      |    |           |           |    |       |    |    |    |    |    |    |
|----------------|--------------------------------------|----|-----------|-----------|----|-------|----|----|----|----|----|----|
| Liver-HCC      | 10db2142-c623-11e3-bf01-24c6515278c0 | 11 | 115072700 | 115073174 | 6  | 474   | 2  | 2  | 2  | NA | NA | NA |
| Breast-AdenoCa | 110b5f05-ded7-45ec-b0f6-a941c92d77dd | 2  | 76396574  | 76405914  | 15 | 9340  | 1  | 7  | 7  | NA | NA | NA |
| Breast-AdenoCa | 110b5f05-ded7-45ec-b0f6-a941c92d77dd | 3  | 192369302 | 192369920 | 7  | 618   | NA | 1  | 6  | NA | NA | NA |
| Breast-AdenoCa | 110b5f05-ded7-45ec-b0f6-a941c92d77dd | 4  | 41206862  | 41211336  | 9  | 4474  | 2  | 4  | 3  | NA | NA | NA |
| Breast-AdenoCa | 110b5f05-ded7-45ec-b0f6-a941c92d77dd | 4  | 41305320  | 41306039  | 7  | 719   | 3  | 3  | 1  | NA | NA | NA |
| Breast-AdenoCa | 110b5f05-ded7-45ec-b0f6-a941c92d77dd | 7  | 70211860  | 70212444  | 6  | 584   | 2  | 1  | 3  | NA | NA | NA |
| Breast-AdenoCa | 110b5f05-ded7-45ec-b0f6-a941c92d77dd | 8  | 66771343  | 66773901  | 10 | 2558  | 2  | 3  | 4  | NA | NA | 1  |
| Breast-AdenoCa | 110b5f05-ded7-45ec-b0f6-a941c92d77dd | 8  | 78053545  | 78056447  | 8  | 2902  | 1  | 4  | 3  | NA | NA | NA |
| Breast-AdenoCa | 110b5f05-ded7-45ec-b0f6-a941c92d77dd | 8  | 78139990  | 78142535  | 7  | 2545  | 4  | 2  | 1  | NA | NA | NA |
| Breast-AdenoCa | 110b5f05-ded7-45ec-b0f6-a941c92d77dd | 14 | 44538248  | 44543771  | 12 | 5523  | 3  | 6  | 2  | NA | NA | 1  |
| Liver-HCC      | 1127b561-ea40-4d5e-95df-daa0a5ebc1e4 | 9  | 124755061 | 124755146 | 6  | 85    | NA | NA | NA | 3  | 3  | NA |
| Panc-AdenoCA   | 1168944c-5451-4a18-8758-88bf5723bdd9 | 2  | 204085673 | 204088219 | 10 | 2546  | 1  | 4  | 5  | NA | NA | NA |
| Prost-AdenoCA  | 120f01d1-8884-4aca-a1cb-36b207b2aa3a | 2  | 40136342  | 40137951  | 7  | 1609  | NA | 3  | 4  | NA | NA | NA |
| Prost-AdenoCA  | 120f01d1-8884-4aca-a1cb-36b207b2aa3a | 3  | 32551659  | 32552687  | 10 | 1028  | NA | 7  | 3  | NA | NA | NA |
| Prost-AdenoCA  | 120f01d1-8884-4aca-a1cb-36b207b2aa3a | 3  | 40117312  | 40118738  | 15 | 1426  | 2  | 12 | 1  | NA | NA | NA |
| Prost-AdenoCA  | 120f01d1-8884-4aca-a1cb-36b207b2aa3a | 3  | 40218585  | 40219560  | 13 | 975   | NA | 8  | 5  | NA | NA | NA |
| Prost-AdenoCA  | 120f01d1-8884-4aca-a1cb-36b207b2aa3a | 3  | 45114244  | 45121141  | 12 | 6897  | 1  | 9  | 2  | NA | NA | NA |
| Prost-AdenoCA  | 120f01d1-8884-4aca-a1cb-36b207b2aa3a | 3  | 103006677 | 103011241 | 14 | 4564  | NA | 10 | 4  | NA | NA | NA |
| Prost-AdenoCA  | 120f01d1-8884-4aca-a1cb-36b207b2aa3a | 3  | 103310023 | 103317693 | 16 | 7670  | 1  | 11 | 4  | NA | NA | NA |
| Prost-AdenoCA  | 120f01d1-8884-4aca-a1cb-36b207b2aa3a | 3  | 113131642 | 113134310 | 7  | 2668  | 1  | 4  | 1  | NA | 1  | NA |
| Prost-AdenoCA  | 120f01d1-8884-4aca-a1cb-36b207b2aa3a | 3  | 118716218 | 118718606 | 12 | 2388  | 1  | 2  | 9  | NA | NA | NA |
| Prost-AdenoCA  | 120f01d1-8884-4aca-a1cb-36b207b2aa3a | 3  | 165847711 | 165849590 | 10 | 1879  | 2  | 6  | 2  | NA | NA | NA |
| Prost-AdenoCA  | 120f01d1-8884-4aca-a1cb-36b207b2aa3a | 3  | 165918824 | 165930127 | 15 | 11303 | 1  | 6  | 8  | NA | NA | NA |
| Lymph-BNHL     | 124d5b04-4588-44c3-9c00-61e064cf1bdb | 6  | 37138438  | 37141935  | 7  | 3497  | NA | 1  | 6  | NA | NA | NA |
| Lymph-BNHL     | 124d5b04-4588-44c3-9c00-61e064cf1bdb | 7  | 12940032  | 12944874  | 7  | 4842  | NA | NA | NA | 3  | 2  | 2  |
| Lymph-BNHL     | 124d5b04-4588-44c3-9c00-61e064cf1bdb | 11 | 35160904  | 35162626  | 13 | 1722  | 1  | 1  | 11 | NA | NA | NA |
| Lymph-BNHL     | 124d5b04-4588-44c3-9c00-61e064cf1bdb | 14 | 106094084 | 106094717 | 8  | 633   | 1  | 2  | 5  | NA | NA | NA |
| Lymph-BNHL     | 124d5b04-4588-44c3-9c00-61e064cf1bdb | 14 | 106110634 | 106114219 | 30 | 3585  | 2  | 2  | 25 | NA | 1  | NA |
| Lymph-BNHL     | 124d5b04-4588-44c3-9c00-61e064cf1bdb | 14 | 106174165 | 106175167 | 8  | 1002  | NA | NA | 8  | NA | NA | NA |
| Lymph-BNHL     | 124d5b04-4588-44c3-9c00-61e064cf1bdb | 14 | 106208559 | 106240262 | 42 | 31703 | 1  | 4  | 37 | NA | NA | NA |
| Lymph-BNHL     | 124d5b04-4588-44c3-9c00-61e064cf1bdb | 14 | 106326544 | 106357499 | 68 | 30955 | 3  | 10 | 41 | 10 | NA | 4  |
| Lymph-BNHL     | 124d5b04-4588-44c3-9c00-61e064cf1bdb | 14 | 106452876 | 106453335 | 8  | 459   | NA | NA | 5  | 2  | NA | 1  |
| Lymph-BNHL     | 124d5b04-4588-44c3-9c00-61e064cf1bdb | 15 | 36762667  | 36778049  | 28 | 15382 | NA | NA | 6  | 10 | 2  | 10 |
| Lymph-BNHL     | 124d5b04-4588-44c3-9c00-61e064cf1bdb | 22 | 23090009  | 23090387  | 8  | 378   | NA | NA | 4  | 1  | NA | 3  |
| Lymph-BNHL     | 124d5b04-4588-44c3-9c00-61e064cf1bdb | 22 | 23235999  | 23242186  | 11 | 6187  | 1  | 3  | 4  | 2  | 1  | NA |
| Lymph-BNHL     | 124d5b04-4588-44c3-9c00-61e064cf1bdb | X  | 48774421  | 48776185  | 6  | 1764  | 1  | NA | 5  | NA | NA | NA |
| Ovary-AdenoCA  | 127b0f7d-d24e-48b7-ac25-d3f14a43952d | 5  | 26401409  | 26403671  | 13 | 2262  | NA | 9  | 4  | NA | NA | NA |
| Ovary-AdenoCA  | 12874085-a596-41ae-b4cd-817cb1ebb278 | 13 | 59109120  | 59111819  | 7  | 2699  | NA | 1  | 6  | NA | NA | NA |
| Ovary-AdenoCA  | 12874085-a596-41ae-b4cd-817cb1ebb278 | 13 | 63293437  | 63306105  | 18 | 12668 | 5  | 11 | 2  | NA | NA | NA |
| Ovary-AdenoCA  | 12874085-a596-41ae-b4cd-817cb1ebb278 | 21 | 10836335  | 10838376  | 10 | 2041  | 1  | 9  | NA | NA | NA | NA |
| Ovary-AdenoCA  | 1292e13b-d7c6-447b-a227-9a8113215580 | 12 | 69087004  | 69087020  | 6  | 16    | NA | 1  | 4  | 1  | NA | NA |
| Panc-AdenoCA   | 129459c1-38be-45da-bb87-18848c97c544 | 1  | 234369859 | 234372326 | 15 | 2467  | 2  | 6  | 7  | NA | NA | NA |
| Panc-AdenoCA   | 129459c1-38be-45da-bb87-18848c97c544 | 6  | 46178513  | 46180183  | 13 | 1670  | 1  | 8  | 4  | NA | NA | NA |
| Panc-AdenoCA   | 129459c1-38be-45da-bb87-18848c97c544 | 10 | 42799029  | 42800833  | 18 | 1804  | 1  | 14 | 3  | NA | NA | NA |
| Panc-AdenoCA   | 129459c1-38be-45da-bb87-18848c97c544 | 11 | 72875369  | 72875898  | 9  | 529   | 1  | 2  | 5  | NA | NA | 1  |
| Panc-AdenoCA   | 129459c1-38be-45da-bb87-18848c97c544 | 15 | 84439343  | 84442681  | 6  | 3338  | 1  | 4  | 1  | NA | NA | NA |
| Ovary-AdenoCA  | 129de5b2-d9b0-4762-9ef8-72d98231fb50 | 19 | 14856806  | 14857874  | 8  | 1068  | NA | 4  | 4  | NA | NA | NA |
| Panc-AdenoCA   | 12f038e1-00af-4c64-a2e0-9e63323492ef | 1  | 177387872 | 177391546 | 7  | 3674  | 2  | 2  | 3  | NA | NA | NA |
| Panc-AdenoCA   | 12f038e1-00af-4c64-a2e0-9e63323492ef | 2  | 30654305  | 30654528  | 7  | 223   | NA | NA | 7  | NA | NA | NA |
| Panc-AdenoCA   | 12f038e1-00af-4c64-a2e0-9e63323492ef | 2  | 31023723  | 31027802  | 7  | 4079  | 1  | NA | 6  | NA | NA | NA |
| Panc-AdenoCA   | 12f038e1-00af-4c64-a2e0-9e63323492ef | 2  | 38326416  | 38328040  | 8  | 1624  | NA | NA | 8  | NA | NA | NA |
| Panc-AdenoCA   | 12f038e1-00af-4c64-a2e0-9e63323492ef | 2  | 38462252  | 38467581  | 7  | 5329  | NA | NA | 6  | 1  | NA | NA |
| Panc-AdenoCA   | 12f038e1-00af-4c64-a2e0-9e63323492ef | 2  | 183188372 | 183194726 | 24 | 6354  | 3  | 13 | 7  | NA | NA | 1  |
| Panc-AdenoCA   | 12f038e1-00af-4c64-a2e0-9e63323492ef | 4  | 52752646  | 52753215  | 7  | 569   | 2  | 1  | 3  | NA | NA | 1  |
| Panc-AdenoCA   | 12f038e1-00af-4c64-a2e0-9e63323492ef | 6  | 92947783  | 92998384  | 52 | 50601 | 4  | 22 | 25 | 1  | NA | NA |
| Panc-AdenoCA   | 12f038e1-00af-4c64-a2e0-9e63323492ef | 6  | 121726741 | 121727241 | 7  | 500   | NA | 5  | 2  | NA | NA | NA |
| Panc-AdenoCA   | 12f038e1-00af-4c64-a2e0-9e63323492ef | 6  | 139309748 | 139311614 | 7  | 1866  | 1  | 6  | NA | NA | NA | NA |
| Panc-AdenoCA   | 12f038e1-00af-4c64-a2e0-9e63323492ef | 6  | 139718768 | 139720153 | 13 | 1385  | 2  | 9  | 2  | NA | NA | NA |
| Panc-AdenoCA   | 12f038e1-00af-4c64-a2e0-9e63323492ef | 13 | 90975395  | 90977150  | 6  | 1755  | 1  | 4  | 1  | NA | NA | NA |
| Panc-AdenoCA   | 12f038e1-00af-4c64-a2e0-9e63323492ef | 18 | 32678986  | 32679221  | 6  | 235   | NA | 6  | NA | NA | NA | NA |

|              |                                      |    |           |           |    |       |    |    |    |    |    |    |
|--------------|--------------------------------------|----|-----------|-----------|----|-------|----|----|----|----|----|----|
| Panc-AdenoCA | 12f038e1-00af-4c64-a2e0-9e63323492ef | 18 | 47978488  | 47978890  | 8  | 402   | 2  | 3  | 3  | NA | NA | NA |
| Panc-AdenoCA | 1327bbd4-a466-4e26-905f-cf91315f1cc8 | 3  | 162910888 | 162912403 | 20 | 1515  | 1  | 7  | 11 | NA | NA | 1  |
| Panc-AdenoCA | 1327bbd4-a466-4e26-905f-cf91315f1cc8 | 3  | 167441422 | 167443238 | 7  | 1816  | NA | 1  | 6  | NA | NA | NA |
| Panc-AdenoCA | 1327bbd4-a466-4e26-905f-cf91315f1cc8 | 3  | 168669548 | 168671841 | 17 | 2293  | 2  | 5  | 10 | NA | NA | NA |
| Panc-AdenoCA | 1327bbd4-a466-4e26-905f-cf91315f1cc8 | 18 | 18623623  | 18624236  | 9  | 613   | NA | 3  | 6  | NA | NA | NA |
| Panc-AdenoCA | 1327bbd4-a466-4e26-905f-cf91315f1cc8 | 18 | 22189728  | 22206665  | 22 | 16937 | NA | 10 | 11 | NA | NA | 1  |
| Panc-AdenoCA | 1327bbd4-a466-4e26-905f-cf91315f1cc8 | 18 | 22344298  | 22360355  | 23 | 16057 | 8  | 8  | 7  | NA | NA | NA |
| Panc-AdenoCA | 1327bbd4-a466-4e26-905f-cf91315f1cc8 | 18 | 22437538  | 22445829  | 11 | 8291  | NA | 5  | 6  | NA | NA | NA |
| Panc-AdenoCA | 1327bbd4-a466-4e26-905f-cf91315f1cc8 | 18 | 22741829  | 22779044  | 48 | 37215 | 9  | 12 | 27 | NA | NA | NA |
| Panc-AdenoCA | 1327bbd4-a466-4e26-905f-cf91315f1cc8 | 18 | 23039599  | 23046580  | 12 | 6981  | 1  | 4  | 7  | NA | NA | NA |
| Panc-AdenoCA | 1327bbd4-a466-4e26-905f-cf91315f1cc8 | 18 | 23535014  | 23541685  | 14 | 6671  | 4  | 2  | 8  | NA | NA | NA |
| Panc-AdenoCA | 1327bbd4-a466-4e26-905f-cf91315f1cc8 | 18 | 24416376  | 24418073  | 9  | 1697  | 1  | 3  | 5  | NA | NA | NA |
| Lymph-CLL    | 132f7f2a-b902-4343-aa08-cf6a7af10b9a | 4  | 182934246 | 182935350 | 6  | 1104  | NA | NA | NA | 2  | 1  | 3  |
| Lymph-CLL    | 132f7f2a-b902-4343-aa08-cf6a7af10b9a | 5  | 161217458 | 161220063 | 6  | 2605  | NA | NA | 1  | 3  | 1  | 1  |
| Lymph-CLL    | 132f7f2a-b902-4343-aa08-cf6a7af10b9a | 8  | 91186657  | 91193022  | 8  | 6365  | NA | NA | 1  | 3  | 1  | 3  |
| Lymph-CLL    | 132f7f2a-b902-4343-aa08-cf6a7af10b9a | 8  | 91202430  | 91213989  | 14 | 11559 | NA | 1  | 2  | 9  | 1  | 1  |
| Lymph-CLL    | 132f7f2a-b902-4343-aa08-cf6a7af10b9a | 14 | 106327223 | 106329359 | 39 | 2136  | 1  | 5  | 8  | 10 | 7  | 8  |
| Lymph-CLL    | 132f7f2a-b902-4343-aa08-cf6a7af10b9a | 18 | 60983860  | 60988646  | 18 | 4786  | NA | 3  | 4  | 7  | 2  | 2  |
| Lymph-CLL    | 132f7f2a-b902-4343-aa08-cf6a7af10b9a | 22 | 22730783  | 22735539  | 16 | 4756  | 1  | 1  | 3  | 7  | NA | 4  |
| Lymph-CLL    | 132f7f2a-b902-4343-aa08-cf6a7af10b9a | 22 | 23227800  | 23232541  | 9  | 4741  | NA | 1  | 4  | 2  | 1  | 1  |
| Lymph-BNHL   | 140d5fa9-afbe-444e-a7e7-6a4cb4ab2923 | 1  | 203275080 | 203276101 | 10 | 1021  | NA | 1  | 7  | NA | 1  | 1  |
| Lymph-BNHL   | 140d5fa9-afbe-444e-a7e7-6a4cb4ab2923 | 2  | 89157083  | 89185661  | 62 | 28578 | 2  | 8  | 20 | 17 | 8  | 7  |
| Lymph-BNHL   | 140d5fa9-afbe-444e-a7e7-6a4cb4ab2923 | 3  | 187459364 | 187464254 | 6  | 4890  | NA | 1  | 3  | NA | 2  | NA |
| Lymph-BNHL   | 140d5fa9-afbe-444e-a7e7-6a4cb4ab2923 | 6  | 392242    | 393466    | 7  | 1224  | NA | NA | 7  | NA | NA | NA |
| Lymph-BNHL   | 140d5fa9-afbe-444e-a7e7-6a4cb4ab2923 | 7  | 53949471  | 53950233  | 11 | 762   | NA | NA | 1  | 5  | NA | 5  |
| Lymph-BNHL   | 140d5fa9-afbe-444e-a7e7-6a4cb4ab2923 | 14 | 106237547 | 106239520 | 7  | 1973  | NA | 1  | 6  | NA | NA | NA |
| Lymph-BNHL   | 140d5fa9-afbe-444e-a7e7-6a4cb4ab2923 | 14 | 106322630 | 106330276 | 99 | 7646  | 7  | 11 | 40 | 14 | 12 | 15 |
| Lymph-BNHL   | 140d5fa9-afbe-444e-a7e7-6a4cb4ab2923 | 14 | 106725558 | 106726120 | 13 | 562   | NA | 2  | 1  | 7  | 1  | 2  |
| Lymph-BNHL   | 140d5fa9-afbe-444e-a7e7-6a4cb4ab2923 | 22 | 23198299  | 23199186  | 9  | 887   | 1  | 2  | 3  | 2  | 1  | NA |
| Lymph-BNHL   | 140d5fa9-afbe-444e-a7e7-6a4cb4ab2923 | 22 | 23227813  | 23248353  | 74 | 20540 | 8  | 15 | 32 | 12 | 1  | 6  |
| Kidney-RCC   | 141918cd-3e23-45bc-96e1-b208c80f69e7 | 5  | 96446094  | 96447728  | 6  | 1634  | 4  | 2  | NA | NA | NA | NA |
| Kidney-RCC   | 141918cd-3e23-45bc-96e1-b208c80f69e7 | 19 | 56366757  | 56370913  | 6  | 4156  | NA | 5  | 1  | NA | NA | NA |
| Panc-AdenoCA | 1447c8cb-25d4-4092-8919-4df08f898d2d | 9  | 87918102  | 87922616  | 6  | 4514  | 1  | 2  | 3  | NA | NA | NA |
| Liver-HCC    | 145f6dbb-9744-44f7-8485-e440689de3fd | 4  | 185302403 | 185303263 | 7  | 860   | 1  | 3  | 3  | NA | NA | NA |
| Lymph-NOS    | 1494bb16-f1f0-42a4-b10e-c383574cbc8b | 1  | 28408514  | 28415422  | 15 | 6908  | NA | 1  | 2  | 6  | 3  | 3  |
| Lymph-NOS    | 1494bb16-f1f0-42a4-b10e-c383574cbc8b | 1  | 31202362  | 31204990  | 7  | 2628  | NA | NA | 4  | 1  | 2  | NA |
| Lymph-NOS    | 1494bb16-f1f0-42a4-b10e-c383574cbc8b | 1  | 31216019  | 31227557  | 46 | 11538 | 1  | 5  | 9  | 15 | 7  | 9  |
| Lymph-NOS    | 1494bb16-f1f0-42a4-b10e-c383574cbc8b | 3  | 80616008  | 80618005  | 15 | 1997  | NA | NA | 1  | 6  | 3  | 5  |
| Lymph-NOS    | 1494bb16-f1f0-42a4-b10e-c383574cbc8b | 3  | 128996107 | 128998908 | 7  | 2801  | 1  | 1  | 4  | NA | NA | 1  |
| Lymph-NOS    | 1494bb16-f1f0-42a4-b10e-c383574cbc8b | 3  | 187461933 | 187464777 | 19 | 2844  | 1  | 3  | 1  | 8  | 3  | 3  |
| Lymph-NOS    | 1494bb16-f1f0-42a4-b10e-c383574cbc8b | 3  | 187658389 | 187664421 | 13 | 6032  | NA | NA | 2  | 6  | 3  | 2  |
| Lymph-NOS    | 1494bb16-f1f0-42a4-b10e-c383574cbc8b | 3  | 187954365 | 187958948 | 11 | 4583  | NA | 1  | 5  | 2  | NA | 3  |
| Lymph-NOS    | 1494bb16-f1f0-42a4-b10e-c383574cbc8b | 4  | 15581060  | 15583853  | 7  | 2793  | NA | NA | 1  | 5  | NA | 1  |
| Lymph-NOS    | 1494bb16-f1f0-42a4-b10e-c383574cbc8b | 7  | 5568465   | 5570818   | 27 | 2353  | 1  | 8  | 8  | 8  | 1  | 1  |
| Lymph-NOS    | 1494bb16-f1f0-42a4-b10e-c383574cbc8b | 7  | 13723056  | 13734778  | 17 | 11722 | NA | NA | 1  | 8  | 4  | 4  |
| Lymph-NOS    | 1494bb16-f1f0-42a4-b10e-c383574cbc8b | 12 | 122457380 | 122463237 | 38 | 5857  | NA | 6  | 11 | 11 | 5  | 5  |
| Lymph-NOS    | 1494bb16-f1f0-42a4-b10e-c383574cbc8b | 14 | 69258594  | 69259292  | 11 | 698   | NA | 3  | 4  | 1  | 1  | 2  |
| Lymph-NOS    | 1494bb16-f1f0-42a4-b10e-c383574cbc8b | 14 | 106050735 | 106055960 | 9  | 5225  | NA | NA | 5  | 2  | NA | 2  |
| Lymph-NOS    | 1494bb16-f1f0-42a4-b10e-c383574cbc8b | 14 | 106071821 | 106096725 | 40 | 24904 | 1  | 6  | 14 | 10 | 3  | 6  |
| Lymph-NOS    | 1494bb16-f1f0-42a4-b10e-c383574cbc8b | 14 | 106323658 | 106329256 | 37 | 5598  | 2  | 10 | 8  | 11 | 3  | 3  |
| Lymph-NOS    | 1494bb16-f1f0-42a4-b10e-c383574cbc8b | 14 | 107209249 | 107232983 | 33 | 23734 | 1  | 4  | 6  | 16 | 4  | 2  |
| Lymph-NOS    | 1494bb16-f1f0-42a4-b10e-c383574cbc8b | 14 | 107258781 | 107259550 | 22 | 769   | 1  | 3  | 5  | 9  | 1  | 3  |
| Lymph-NOS    | 1494bb16-f1f0-42a4-b10e-c383574cbc8b | 16 | 85932062  | 85933387  | 11 | 1325  | NA | 2  | NA | 6  | NA | 3  |
| Lymph-NOS    | 1494bb16-f1f0-42a4-b10e-c383574cbc8b | 17 | 79478380  | 79482554  | 17 | 4174  | 1  | 4  | 1  | 8  | 2  | 1  |
| Lymph-NOS    | 1494bb16-f1f0-42a4-b10e-c383574cbc8b | 19 | 10304821  | 10308678  | 9  | 3857  | NA | 1  | 4  | 2  | NA | 2  |
| Lymph-NOS    | 1494bb16-f1f0-42a4-b10e-c383574cbc8b | 19 | 10340696  | 10353269  | 17 | 12573 | NA | 2  | 5  | 5  | 2  | 3  |
| Lymph-NOS    | 1494bb16-f1f0-42a4-b10e-c383574cbc8b | 22 | 22516823  | 22521836  | 12 | 5013  | NA | 2  | 5  | 1  | NA | 4  |
| Lymph-NOS    | 1494bb16-f1f0-42a4-b10e-c383574cbc8b | 22 | 22697876  | 22712051  | 41 | 14175 | NA | 1  | 7  | 17 | 11 | 5  |
| Lymph-NOS    | 1494bb16-f1f0-42a4-b10e-c383574cbc8b | 22 | 23028325  | 23029196  | 12 | 871   | NA | 4  | 3  | 3  | NA | 2  |
| Lymph-NOS    | 1494bb16-f1f0-42a4-b10e-c383574cbc8b | 22 | 23244121  | 23247591  | 12 | 3470  | NA | 4  | NA | 3  | 4  | 1  |

|                |                                      |    |           |           |     |       |    |    |    |    |    |    |
|----------------|--------------------------------------|----|-----------|-----------|-----|-------|----|----|----|----|----|----|
| Cervix-SCC     | 14b8bbf2-310b-459b-b52d-a7ef510ce1cf | 1  | 234488817 | 234496195 | 10  | 7378  | 3  | 1  | 6  | NA | NA | NA |
| Cervix-SCC     | 14b8bbf2-310b-459b-b52d-a7ef510ce1cf | 5  | 137767497 | 137769564 | 7   | 2067  | 1  | 3  | 3  | NA | NA | NA |
| Cervix-SCC     | 14b8bbf2-310b-459b-b52d-a7ef510ce1cf | 8  | 137207885 | 137212886 | 8   | 5001  | 1  | 2  | 5  | NA | NA | NA |
| Cervix-SCC     | 14b8bbf2-310b-459b-b52d-a7ef510ce1cf | 12 | 121372940 | 121374088 | 7   | 1148  | NA | 4  | 3  | NA | NA | NA |
| Lung-AdenoCA   | 14bf9bfb-14d6-4cac-a556-828f680e8a15 | 1  | 32643702  | 32646291  | 6   | 2589  | 1  | 3  | 2  | NA | NA | NA |
| Lung-AdenoCA   | 14bf9bfb-14d6-4cac-a556-828f680e8a15 | 1  | 167222582 | 167228647 | 10  | 6065  | 1  | NA | 9  | NA | NA | NA |
| Lung-AdenoCA   | 14bf9bfb-14d6-4cac-a556-828f680e8a15 | 4  | 99329089  | 99333175  | 8   | 4086  | NA | NA | 8  | NA | NA | NA |
| Lung-AdenoCA   | 14bf9bfb-14d6-4cac-a556-828f680e8a15 | 4  | 101906182 | 101915340 | 18  | 9158  | NA | 2  | 16 | NA | NA | NA |
| Lung-AdenoCA   | 14bf9bfb-14d6-4cac-a556-828f680e8a15 | 4  | 166512348 | 166517698 | 20  | 5350  | 2  | 10 | 8  | NA | NA | NA |
| Lung-AdenoCA   | 14bf9bfb-14d6-4cac-a556-828f680e8a15 | 5  | 161294279 | 161299238 | 7   | 4959  | NA | NA | 6  | 1  | NA | NA |
| Lung-AdenoCA   | 14bf9bfb-14d6-4cac-a556-828f680e8a15 | 5  | 171674237 | 171675102 | 8   | 865   | 1  | 6  | 1  | NA | NA | NA |
| Ovary-AdenoCA  | 14ed7388-41ed-43d4-afb2-04cd6410d5d2 | 8  | 42909953  | 42912234  | 8   | 2281  | 1  | 4  | 3  | NA | NA | NA |
| Ovary-AdenoCA  | 14ed7388-41ed-43d4-afb2-04cd6410d5d2 | 11 | 40143235  | 40149417  | 17  | 6182  | NA | 10 | 7  | NA | NA | NA |
| Ovary-AdenoCA  | 14ed7388-41ed-43d4-afb2-04cd6410d5d2 | 19 | 23114885  | 23117781  | 16  | 2896  | 2  | 8  | 6  | NA | NA | NA |
| Ovary-AdenoCA  | 14ed7388-41ed-43d4-afb2-04cd6410d5d2 | 19 | 28494814  | 28496275  | 7   | 1461  | 3  | 3  | 1  | NA | NA | NA |
| Ovary-AdenoCA  | 14ed7388-41ed-43d4-afb2-04cd6410d5d2 | 19 | 33883830  | 33884891  | 8   | 1061  | 1  | 1  | 6  | NA | NA | NA |
| Prost-AdenoCA  | 1558629a-770a-4dcb-b0bf-9a8bcea9d80b | 1  | 143383848 | 143384543 | 7   | 695   | NA | 3  | 4  | NA | NA | NA |
| Prost-AdenoCA  | 1558629a-770a-4dcb-b0bf-9a8bcea9d80b | 6  | 17166546  | 17168489  | 18  | 1943  | NA | 13 | 5  | NA | NA | NA |
| Prost-AdenoCA  | 1558629a-770a-4dcb-b0bf-9a8bcea9d80b | 10 | 92787655  | 92788276  | 8   | 621   | NA | 3  | 5  | NA | NA | NA |
| Prost-AdenoCA  | 1558629a-770a-4dcb-b0bf-9a8bcea9d80b | 10 | 92975712  | 92977269  | 9   | 1557  | 1  | 5  | 3  | NA | NA | NA |
| Prost-AdenoCA  | 1558629a-770a-4dcb-b0bf-9a8bcea9d80b | X  | 120528044 | 120534497 | 12  | 6453  | NA | 7  | 5  | NA | NA | NA |
| Kidney-RCC     | 155873b2-e5de-405f-87f6-6de0d238b160 | 1  | 51899830  | 51900410  | 8   | 580   | NA | 4  | 2  | NA | NA | 2  |
| Lymph-BNHL     | 15678c3d-ce61-454d-849e-1d4ca358909b | 1  | 20751459  | 20756123  | 7   | 4664  | NA | NA | NA | 4  | 2  | 1  |
| Lymph-BNHL     | 15678c3d-ce61-454d-849e-1d4ca358909b | 1  | 72188041  | 72190109  | 10  | 2068  | NA | 1  | 1  | 2  | 2  | 4  |
| Lymph-BNHL     | 15678c3d-ce61-454d-849e-1d4ca358909b | 2  | 58177060  | 58186985  | 22  | 9925  | NA | 2  | 4  | 12 | 2  | 2  |
| Lymph-BNHL     | 15678c3d-ce61-454d-849e-1d4ca358909b | 2  | 81402903  | 81406432  | 13  | 3529  | NA | NA | 1  | 4  | 4  | 4  |
| Lymph-BNHL     | 15678c3d-ce61-454d-849e-1d4ca358909b | 2  | 89126423  | 89128612  | 7   | 2189  | 2  | 1  | 3  | NA | 1  | NA |
| Lymph-BNHL     | 15678c3d-ce61-454d-849e-1d4ca358909b | 2  | 89155484  | 89160200  | 49  | 4716  | 3  | 7  | 7  | 16 | 11 | 5  |
| Lymph-BNHL     | 15678c3d-ce61-454d-849e-1d4ca358909b | 3  | 147719936 | 147723407 | 6   | 3471  | NA | NA | 1  | 3  | 1  | 1  |
| Lymph-BNHL     | 15678c3d-ce61-454d-849e-1d4ca358909b | 3  | 164340006 | 164341044 | 7   | 1038  | NA | NA | 1  | NA | 2  | 4  |
| Lymph-BNHL     | 15678c3d-ce61-454d-849e-1d4ca358909b | 4  | 166402103 | 166402242 | 6   | 139   | NA | NA | NA | 3  | 2  | 1  |
| Lymph-BNHL     | 15678c3d-ce61-454d-849e-1d4ca358909b | 5  | 129799108 | 129802164 | 14  | 3056  | 1  | 1  | 4  | 1  | 4  | 3  |
| Lymph-BNHL     | 15678c3d-ce61-454d-849e-1d4ca358909b | 6  | 37130020  | 37134307  | 6   | 4287  | 1  | 1  | 1  | 1  | 1  | 1  |
| Lymph-BNHL     | 15678c3d-ce61-454d-849e-1d4ca358909b | 6  | 91005079  | 91007026  | 13  | 1947  | NA | 2  | 8  | 2  | NA | 1  |
| Lymph-BNHL     | 15678c3d-ce61-454d-849e-1d4ca358909b | 11 | 87246583  | 87250856  | 7   | 4273  | 1  | NA | NA | 1  | 1  | 4  |
| Lymph-BNHL     | 15678c3d-ce61-454d-849e-1d4ca358909b | 12 | 122459020 | 122463315 | 8   | 4295  | NA | 4  | 3  | NA | 1  | NA |
| Lymph-BNHL     | 15678c3d-ce61-454d-849e-1d4ca358909b | 13 | 69272722  | 69275330  | 7   | 2608  | 1  | NA | 2  | NA | 2  | 2  |
| Lymph-BNHL     | 15678c3d-ce61-454d-849e-1d4ca358909b | 14 | 106112939 | 106114419 | 13  | 1480  | 2  | 2  | 9  | NA | NA | NA |
| Lymph-BNHL     | 15678c3d-ce61-454d-849e-1d4ca358909b | 14 | 106326608 | 106330044 | 162 | 3436  | 9  | 32 | 41 | 24 | 28 | 28 |
| Lymph-BNHL     | 15678c3d-ce61-454d-849e-1d4ca358909b | 14 | 106994195 | 106995031 | 22  | 836   | 1  | 2  | 5  | 5  | 5  | 4  |
| Lymph-BNHL     | 15678c3d-ce61-454d-849e-1d4ca358909b | 14 | 107175890 | 107179639 | 22  | 3749  | 2  | 6  | 4  | 6  | 2  | 2  |
| Lymph-BNHL     | 15678c3d-ce61-454d-849e-1d4ca358909b | 17 | 68001315  | 68005345  | 6   | 4030  | NA | 2  | 1  | NA | 2  | 1  |
| Lymph-BNHL     | 15678c3d-ce61-454d-849e-1d4ca358909b | 18 | 60805267  | 60809501  | 10  | 4234  | NA | 2  | NA | 3  | 3  | 2  |
| Lymph-BNHL     | 15678c3d-ce61-454d-849e-1d4ca358909b | 18 | 60984221  | 60988552  | 56  | 4331  | 3  | 12 | 21 | 8  | 7  | 5  |
| Lymph-BNHL     | 15678c3d-ce61-454d-849e-1d4ca358909b | 18 | 72804180  | 72807104  | 7   | 2924  | NA | 1  | 1  | 2  | 2  | 1  |
| Lymph-BNHL     | 15678c3d-ce61-454d-849e-1d4ca358909b | 22 | 22724243  | 22724576  | 6   | 333   | NA | NA | 4  | 2  | NA | NA |
| Lymph-BNHL     | 15678c3d-ce61-454d-849e-1d4ca358909b | 22 | 22730431  | 22735384  | 25  | 4953  | 1  | 3  | 13 | 4  | 2  | 2  |
| Lymph-BNHL     | 15678c3d-ce61-454d-849e-1d4ca358909b | 22 | 23223154  | 23247604  | 48  | 24450 | 1  | 8  | 23 | 6  | 3  | 7  |
| Lymph-BNHL     | 15678c3d-ce61-454d-849e-1d4ca358909b | X  | 46543184  | 46543429  | 8   | 245   | NA | NA | NA | 6  | 1  | 1  |
| Liver-HCC      | 15895218-c623-11e3-bf01-24c6515278c0 | 4  | 45345005  | 45346316  | 9   | 1311  | 1  | 5  | 3  | NA | NA | NA |
| Liver-HCC      | 15895218-c623-11e3-bf01-24c6515278c0 | 14 | 24261042  | 24264179  | 10  | 3137  | 2  | 1  | 7  | NA | NA | NA |
| Liver-HCC      | 15895218-c623-11e3-bf01-24c6515278c0 | 14 | 32049613  | 32051922  | 10  | 2309  | NA | 5  | 4  | 1  | NA | NA |
| Kidney-RCC     | 15a93657-0521-430a-a81b-bf0842374b75 | 1  | 192094352 | 192096457 | 9   | 2105  | 2  | 2  | 5  | NA | NA | NA |
| Eso-AdenoCa    | 15e7d981-8c27-4b2b-b4f8-626e22021895 | 10 | 87122788  | 87123375  | 31  | 587   | NA | NA | NA | 31 | NA | NA |
| Eso-AdenoCa    | 15e7d981-8c27-4b2b-b4f8-626e22021895 | 10 | 116523822 | 116525314 | 7   | 1492  | 2  | 5  | NA | NA | NA | NA |
| Eso-AdenoCa    | 15e7d981-8c27-4b2b-b4f8-626e22021895 | 19 | 30397855  | 30402083  | 8   | 4228  | 1  | NA | 6  | 1  | NA | NA |
| Breast-AdenoCa | 15f90ef0-831b-40a3-98bd-ec226a9e8b26 | 1  | 239243091 | 239244448 | 8   | 1357  | 2  | 2  | 4  | NA | NA | NA |
| Breast-AdenoCa | 15f90ef0-831b-40a3-98bd-ec226a9e8b26 | 9  | 36640510  | 36640811  | 6   | 301   | NA | 3  | 2  | 1  | NA | NA |
| Liver-HCC      | 15fd8dc8-c622-11e3-bf01-24c6515278c0 | 9  | 43459840  | 43460190  | 6   | 350   | NA | NA | 6  | NA | NA | NA |
| Liver-HCC      | 15fd8dc8-c622-11e3-bf01-24c6515278c0 | 9  | 136610777 | 136615626 | 8   | 4849  | NA | 1  | 7  | NA | NA | NA |

|                 |                                      |    |           |           |    |       |    |    |    |    |    |    |
|-----------------|--------------------------------------|----|-----------|-----------|----|-------|----|----|----|----|----|----|
| Ovary-AdenoCA   | 1659bae5-3140-4d05-891c-81b48277b2fc | 6  | 167018772 | 167019893 | 9  | 1121  | 3  | 3  | 3  | NA | NA | NA |
| Ovary-AdenoCA   | 1659bae5-3140-4d05-891c-81b48277b2fc | 11 | 81448219  | 81458725  | 22 | 10506 | 10 | 8  | 4  | NA | NA | NA |
| Ovary-AdenoCA   | 1659bae5-3140-4d05-891c-81b48277b2fc | 11 | 83659695  | 83662240  | 18 | 2545  | 3  | 11 | 4  | NA | NA | NA |
| Bone-Leiomyo    | 16d33e09-2e21-4da2-8e57-e78ce28c4408 | 1  | 196584116 | 196584733 | 7  | 617   | NA | 5  | 2  | NA | NA | NA |
| Bone-Leiomyo    | 16d33e09-2e21-4da2-8e57-e78ce28c4408 | 2  | 111887286 | 111887877 | 11 | 591   | 1  | 1  | 9  | NA | NA | NA |
| Bone-Leiomyo    | 16d33e09-2e21-4da2-8e57-e78ce28c4408 | 2  | 118459914 | 118461910 | 11 | 1996  | NA | 9  | 2  | NA | NA | NA |
| Bone-Leiomyo    | 16d33e09-2e21-4da2-8e57-e78ce28c4408 | 4  | 129852096 | 129855825 | 8  | 3729  | 2  | 3  | 3  | NA | NA | NA |
| Bone-Leiomyo    | 16d33e09-2e21-4da2-8e57-e78ce28c4408 | 7  | 57291428  | 57294889  | 9  | 3461  | 3  | 3  | 2  | NA | 1  | NA |
| Bone-Leiomyo    | 16d33e09-2e21-4da2-8e57-e78ce28c4408 | 8  | 1768250   | 1768928   | 6  | 678   | 2  | 1  | 3  | NA | NA | NA |
| Bone-Leiomyo    | 16d33e09-2e21-4da2-8e57-e78ce28c4408 | 8  | 3490865   | 3491582   | 12 | 717   | 1  | 9  | 2  | NA | NA | NA |
| Bone-Leiomyo    | 16d33e09-2e21-4da2-8e57-e78ce28c4408 | 10 | 58566056  | 58574882  | 37 | 8826  | 3  | 21 | 13 | NA | NA | NA |
| Bone-Leiomyo    | 16d33e09-2e21-4da2-8e57-e78ce28c4408 | 10 | 67294267  | 67303896  | 42 | 9629  | 4  | 25 | 13 | NA | NA | NA |
| Bone-Leiomyo    | 16d33e09-2e21-4da2-8e57-e78ce28c4408 | 12 | 30226614  | 30227835  | 7  | 1221  | 2  | 2  | 3  | NA | NA | NA |
| Bone-Leiomyo    | 16d33e09-2e21-4da2-8e57-e78ce28c4408 | 12 | 33663896  | 33669813  | 20 | 5917  | 2  | 13 | 4  | NA | NA | 1  |
| Bone-Leiomyo    | 16d33e09-2e21-4da2-8e57-e78ce28c4408 | 13 | 69765631  | 69766619  | 6  | 988   | NA | 3  | 3  | NA | NA | NA |
| Bone-Leiomyo    | 16d33e09-2e21-4da2-8e57-e78ce28c4408 | 15 | 24306118  | 24308408  | 12 | 2290  | NA | 6  | 6  | NA | NA | NA |
| Bone-Leiomyo    | 16d33e09-2e21-4da2-8e57-e78ce28c4408 | 18 | 19685647  | 19686695  | 6  | 1048  | NA | 4  | 2  | NA | NA | NA |
| Bone-Leiomyo    | 16d33e09-2e21-4da2-8e57-e78ce28c4408 | 18 | 23348064  | 23351605  | 8  | 3541  | 2  | 3  | 3  | NA | NA | NA |
| Bone-Leiomyo    | 16d33e09-2e21-4da2-8e57-e78ce28c4408 | 18 | 23633137  | 23634194  | 11 | 1057  | 1  | 6  | 4  | NA | NA | NA |
| Bone-Leiomyo    | 16d33e09-2e21-4da2-8e57-e78ce28c4408 | 18 | 24327383  | 24327828  | 10 | 445   | NA | 7  | 3  | NA | NA | NA |
| Bone-Leiomyo    | 16d33e09-2e21-4da2-8e57-e78ce28c4408 | 18 | 58589881  | 58591234  | 8  | 1353  | 2  | 1  | 5  | NA | NA | NA |
| Bone-Leiomyo    | 16d33e09-2e21-4da2-8e57-e78ce28c4408 | 18 | 74587263  | 74592142  | 14 | 4879  | 2  | 8  | 4  | NA | NA | NA |
| Bone-Leiomyo    | 16d33e09-2e21-4da2-8e57-e78ce28c4408 | 21 | 38126441  | 38128141  | 9  | 1700  | 1  | 4  | 4  | NA | NA | NA |
| Bone-Leiomyo    | 16d33e09-2e21-4da2-8e57-e78ce28c4408 | X  | 81810293  | 81810530  | 8  | 237   | NA | 5  | 2  | 1  | NA | NA |
| Bone-Leiomyo    | 16d33e09-2e21-4da2-8e57-e78ce28c4408 | X  | 117937685 | 117940683 | 17 | 2998  | NA | 9  | 8  | NA | NA | NA |
| Ovary-AdenoCA   | 16df7888-2480-4394-8856-d57a6ef371d2 | 1  | 217629037 | 217634470 | 23 | 5433  | 5  | 16 | 2  | NA | NA | NA |
| Ovary-AdenoCA   | 16df7888-2480-4394-8856-d57a6ef371d2 | 2  | 42281199  | 42286224  | 8  | 5025  | 1  | 4  | 3  | NA | NA | NA |
| Ovary-AdenoCA   | 16df7888-2480-4394-8856-d57a6ef371d2 | 2  | 230212180 | 230217811 | 18 | 5631  | 2  | 10 | 6  | NA | NA | NA |
| Ovary-AdenoCA   | 16df7888-2480-4394-8856-d57a6ef371d2 | 4  | 186798485 | 186802261 | 6  | 3776  | 1  | 2  | 3  | NA | NA | NA |
| Ovary-AdenoCA   | 16df7888-2480-4394-8856-d57a6ef371d2 | 19 | 5102643   | 5106594   | 15 | 3951  | 2  | 9  | 4  | NA | NA | NA |
| Ovary-AdenoCA   | 16df7888-2480-4394-8856-d57a6ef371d2 | 19 | 27799575  | 27801221  | 7  | 1646  | 2  | 1  | 4  | NA | NA | NA |
| Ovary-AdenoCA   | 16df7888-2480-4394-8856-d57a6ef371d2 | 19 | 28323458  | 28325690  | 9  | 2232  | 2  | 3  | 4  | NA | NA | NA |
| Ovary-AdenoCA   | 16df7888-2480-4394-8856-d57a6ef371d2 | 19 | 29591199  | 29592610  | 13 | 1411  | 1  | 2  | 10 | NA | NA | NA |
| Ovary-AdenoCA   | 16df7888-2480-4394-8856-d57a6ef371d2 | 20 | 2160863   | 2164280   | 10 | 3417  | 2  | 4  | 3  | NA | 1  | NA |
| Ovary-AdenoCA   | 16df7888-2480-4394-8856-d57a6ef371d2 | 20 | 6609152   | 6616597   | 12 | 7445  | 3  | 7  | 2  | NA | NA | NA |
| Ovary-AdenoCA   | 16df7888-2480-4394-8856-d57a6ef371d2 | 20 | 9416043   | 9427410   | 15 | 11367 | 2  | 8  | 5  | NA | NA | NA |
| Ovary-AdenoCA   | 16df7888-2480-4394-8856-d57a6ef371d2 | 20 | 14521950  | 14530961  | 15 | 9011  | 4  | 9  | 2  | NA | NA | NA |
| Ovary-AdenoCA   | 16df7888-2480-4394-8856-d57a6ef371d2 | 20 | 14583351  | 14586033  | 14 | 2682  | 9  | 5  | NA | NA | NA | NA |
| Ovary-AdenoCA   | 16df7888-2480-4394-8856-d57a6ef371d2 | 20 | 17208204  | 17211354  | 16 | 3150  | 4  | 7  | 5  | NA | NA | NA |
| Ovary-AdenoCA   | 16df7888-2480-4394-8856-d57a6ef371d2 | 20 | 22589316  | 22604236  | 17 | 14920 | 4  | 9  | 4  | NA | NA | NA |
| Ovary-AdenoCA   | 16df7888-2480-4394-8856-d57a6ef371d2 | 20 | 24009798  | 24012571  | 7  | 2773  | 3  | 2  | 2  | NA | NA | NA |
| Ovary-AdenoCA   | 16df7888-2480-4394-8856-d57a6ef371d2 | 20 | 24627380  | 24631408  | 7  | 4028  | 1  | 5  | 1  | NA | NA | NA |
| Panc-AdenoCA    | 170ad241-9e24-469b-b7ca-3fd783a89b21 | 1  | 234026453 | 234029080 | 43 | 2627  | 8  | 20 | 15 | NA | NA | NA |
| Panc-AdenoCA    | 170ad241-9e24-469b-b7ca-3fd783a89b21 | 2  | 100816182 | 100818820 | 14 | 2638  | 1  | 6  | 7  | NA | NA | NA |
| Panc-AdenoCA    | 170ad241-9e24-469b-b7ca-3fd783a89b21 | 2  | 107265163 | 107266852 | 7  | 1689  | 3  | 2  | 2  | NA | NA | NA |
| Panc-AdenoCA    | 170ad241-9e24-469b-b7ca-3fd783a89b21 | 2  | 167493127 | 167496440 | 8  | 3313  | NA | NA | 8  | NA | NA | NA |
| Panc-AdenoCA    | 170ad241-9e24-469b-b7ca-3fd783a89b21 | 12 | 7450738   | 7453870   | 9  | 3132  | 2  | 4  | 2  | NA | NA | 1  |
| Panc-AdenoCA    | 170ad241-9e24-469b-b7ca-3fd783a89b21 | 12 | 55668169  | 55670629  | 7  | 2460  | NA | NA | 7  | NA | NA | NA |
| Panc-AdenoCA    | 170ad241-9e24-469b-b7ca-3fd783a89b21 | 12 | 55974012  | 55976277  | 19 | 2265  | NA | NA | 19 | NA | NA | NA |
| Panc-AdenoCA    | 170ad241-9e24-469b-b7ca-3fd783a89b21 | 17 | 38101622  | 38103058  | 7  | 1436  | 1  | 4  | 2  | NA | NA | NA |
| Panc-AdenoCA    | 170ad241-9e24-469b-b7ca-3fd783a89b21 | 19 | 22668388  | 22671790  | 22 | 3402  | 1  | NA | 21 | NA | NA | NA |
| Panc-AdenoCA    | 170ad241-9e24-469b-b7ca-3fd783a89b21 | 19 | 22760572  | 22761155  | 7  | 583   | NA | NA | 7  | NA | NA | NA |
| Panc-AdenoCA    | 170ad241-9e24-469b-b7ca-3fd783a89b21 | 19 | 22969449  | 22979975  | 36 | 10526 | 2  | 5  | 27 | 2  | NA | NA |
| Panc-AdenoCA    | 170ad241-9e24-469b-b7ca-3fd783a89b21 | 19 | 28914316  | 28915466  | 10 | 1150  | 2  | 3  | 5  | NA | NA | NA |
| Panc-AdenoCA    | 170ad241-9e24-469b-b7ca-3fd783a89b21 | 19 | 32076681  | 32086025  | 14 | 9344  | 1  | 9  | 3  | 1  | NA | NA |
| Head-SCC        | 1727e88b-df0a-4af2-9191-8c6061d98ad0 | 7  | 54334813  | 54336715  | 9  | 1902  | 1  | 2  | 6  | NA | NA | NA |
| Head-SCC        | 1727e88b-df0a-4af2-9191-8c6061d98ad0 | 18 | 21577936  | 21580553  | 10 | 2617  | 1  | 4  | 5  | NA | NA | NA |
| Stomach-AdenoCA | 172c9864-c26d-4e9b-947a-e8ce761e996d | 9  | 3457828   | 3458578   | 31 | 750   | NA | NA | 31 | NA | NA | NA |
| Stomach-AdenoCA | 172c9864-c26d-4e9b-947a-e8ce761e996d | 12 | 69706431  | 69706926  | 7  | 495   | 3  | 4  | NA | NA | NA | NA |
| Panc-AdenoCA    | 1776f326-b12f-4355-8107-80fa6fcd2159 | 10 | 35638751  | 35638963  | 6  | 212   | NA | 2  | 4  | NA | NA | NA |

|                 |                                      |    |           |           |     |       |    |    |    |    |    |    |
|-----------------|--------------------------------------|----|-----------|-----------|-----|-------|----|----|----|----|----|----|
| Panc-AdenoCA    | 1776f326-b12f-4355-8107-80fa6fcd2159 | 15 | 98205509  | 98207004  | 12  | 1495  | NA | 7  | 5  | NA | NA | NA |
| Liver-HCC       | 17de5b12-c623-11e3-bf01-24c6515278c0 | 1  | 38808882  | 38817102  | 18  | 8220  | 3  | 3  | 11 | NA | NA | 1  |
| Liver-HCC       | 17de5b12-c623-11e3-bf01-24c6515278c0 | 6  | 3962243   | 3962933   | 11  | 690   | 1  | 6  | 4  | NA | NA | NA |
| Liver-HCC       | 17de5b12-c623-11e3-bf01-24c6515278c0 | 6  | 27264260  | 27264817  | 7   | 557   | 2  | 1  | 4  | NA | NA | NA |
| Liver-HCC       | 17de5b12-c623-11e3-bf01-24c6515278c0 | 6  | 28800150  | 28802851  | 7   | 2701  | 2  | 2  | 3  | NA | NA | NA |
| Ovary-AdenoCA   | 17ed8831-a261-42d9-8ff3-cf75a6cb2a24 | 7  | 38698836  | 38702340  | 6   | 3504  | NA | 6  | NA | NA | NA | NA |
| Ovary-AdenoCA   | 17ed8831-a261-42d9-8ff3-cf75a6cb2a24 | 8  | 118565026 | 118567593 | 6   | 2567  | NA | 3  | 3  | NA | NA | NA |
| Ovary-AdenoCA   | 17ed8831-a261-42d9-8ff3-cf75a6cb2a24 | 10 | 6125464   | 6126072   | 6   | 608   | 4  | 2  | NA | NA | NA | NA |
| Ovary-AdenoCA   | 17ed8831-a261-42d9-8ff3-cf75a6cb2a24 | 11 | 78147407  | 78147889  | 7   | 482   | NA | 2  | 5  | NA | NA | NA |
| Ovary-AdenoCA   | 17ed8831-a261-42d9-8ff3-cf75a6cb2a24 | 12 | 38307950  | 38309709  | 6   | 1759  | NA | 3  | 2  | 1  | NA | NA |
| Ovary-AdenoCA   | 17ed8831-a261-42d9-8ff3-cf75a6cb2a24 | 18 | 5913327   | 5913678   | 7   | 351   | 1  | 2  | 4  | NA | NA | NA |
| Ovary-AdenoCA   | 17ed8831-a261-42d9-8ff3-cf75a6cb2a24 | 19 | 29106972  | 29107897  | 7   | 925   | 1  | 2  | 4  | NA | NA | NA |
| Ovary-AdenoCA   | 17ed8831-a261-42d9-8ff3-cf75a6cb2a24 | 21 | 45234891  | 45235979  | 9   | 1088  | NA | 4  | 5  | NA | NA | NA |
| Panc-AdenoCA    | 183b04f5-107f-496c-8e9a-8263dd00cffa | 2  | 157189342 | 157190268 | 6   | 926   | NA | NA | 6  | NA | NA | NA |
| Panc-AdenoCA    | 183b04f5-107f-496c-8e9a-8263dd00cffa | 18 | 22458988  | 22461210  | 15  | 2222  | 4  | 7  | 4  | NA | NA | NA |
| Bone-Leiomyo    | 18ec066e-8510-4921-9e35-45d85fb01e38 | 1  | 164366233 | 164370534 | 8   | 4301  | NA | NA | 7  | NA | 1  | NA |
| Bone-Leiomyo    | 18ec066e-8510-4921-9e35-45d85fb01e38 | 1  | 167375692 | 167381363 | 7   | 5671  | NA | NA | 7  | NA | NA | NA |
| Bone-Leiomyo    | 18ec066e-8510-4921-9e35-45d85fb01e38 | 1  | 171889798 | 171890974 | 8   | 1176  | NA | 1  | 7  | NA | NA | NA |
| Bone-Leiomyo    | 18ec066e-8510-4921-9e35-45d85fb01e38 | 1  | 171979194 | 171985028 | 8   | 5834  | 2  | NA | 6  | NA | NA | NA |
| Bone-Leiomyo    | 18ec066e-8510-4921-9e35-45d85fb01e38 | 5  | 273765    | 274619    | 6   | 854   | NA | 1  | 4  | NA | 1  | NA |
| Bone-Leiomyo    | 18ec066e-8510-4921-9e35-45d85fb01e38 | 5  | 10932990  | 10938624  | 14  | 5634  | 5  | 1  | 8  | NA | NA | NA |
| Bone-Leiomyo    | 18ec066e-8510-4921-9e35-45d85fb01e38 | 5  | 12400492  | 12402855  | 9   | 2363  | 2  | 3  | 4  | NA | NA | NA |
| Bone-Leiomyo    | 18ec066e-8510-4921-9e35-45d85fb01e38 | 5  | 13351376  | 13355598  | 8   | 4222  | NA | 2  | 6  | NA | NA | NA |
| Bone-Leiomyo    | 18ec066e-8510-4921-9e35-45d85fb01e38 | 5  | 32088579  | 32090098  | 8   | 1519  | NA | 2  | 6  | NA | NA | NA |
| Bone-Leiomyo    | 18ec066e-8510-4921-9e35-45d85fb01e38 | 12 | 18835046  | 18835224  | 6   | 178   | NA | NA | 6  | NA | NA | NA |
| Bone-Leiomyo    | 18ec066e-8510-4921-9e35-45d85fb01e38 | 12 | 58167474  | 58168791  | 9   | 1317  | 4  | 3  | 2  | NA | NA | NA |
| Bone-Leiomyo    | 18ec066e-8510-4921-9e35-45d85fb01e38 | 12 | 58311828  | 58312083  | 7   | 255   | 1  | 2  | 4  | NA | NA | NA |
| Bone-Leiomyo    | 18ec066e-8510-4921-9e35-45d85fb01e38 | 12 | 58547509  | 58550563  | 9   | 3054  | 3  | 3  | 3  | NA | NA | NA |
| Bone-Leiomyo    | 18ec066e-8510-4921-9e35-45d85fb01e38 | 12 | 69921692  | 69932123  | 14  | 10431 | 5  | 2  | 6  | NA | 1  | NA |
| Bone-Leiomyo    | 18ec066e-8510-4921-9e35-45d85fb01e38 | 12 | 85049364  | 85051646  | 8   | 2282  | 2  | 2  | 4  | NA | NA | NA |
| Bone-Leiomyo    | 18ec066e-8510-4921-9e35-45d85fb01e38 | 12 | 85175407  | 85179707  | 11  | 4300  | 1  | 2  | 8  | NA | NA | NA |
| Bone-Leiomyo    | 18ec066e-8510-4921-9e35-45d85fb01e38 | 19 | 7512100   | 7515008   | 11  | 2908  | 3  | NA | 8  | NA | NA | NA |
| Liver-HCC       | 18f5e75e-c623-11e3-bf01-24c6515278c0 | 19 | 22936045  | 22936599  | 7   | 554   | NA | 4  | 3  | NA | NA | NA |
| Head-SCC        | 190b6791-383d-4e27-870d-e470630843e7 | 2  | 97023041  | 97024809  | 6   | 1768  | 1  | 3  | 2  | NA | NA | NA |
| Head-SCC        | 190b6791-383d-4e27-870d-e470630843e7 | 2  | 197989072 | 197991746 | 42  | 2674  | 4  | 17 | 19 | NA | NA | 2  |
| Head-SCC        | 190b6791-383d-4e27-870d-e470630843e7 | 8  | 32080547  | 32082782  | 15  | 2235  | 5  | 4  | 6  | NA | NA | NA |
| Head-SCC        | 190b6791-383d-4e27-870d-e470630843e7 | 11 | 27509316  | 27510673  | 14  | 1357  | 2  | 5  | 7  | NA | NA | NA |
| Uterus-AdenoCA  | 19c1c97f-a3ec-44a8-8a20-6f97caed1a4f | 1  | 116888377 | 116894188 | 17  | 5811  | 4  | 7  | 6  | NA | NA | NA |
| Panc-AdenoCA    | 1a0ef226-41a5-4b56-9078-4b7834f0c976 | 2  | 96765877  | 96768253  | 8   | 2376  | 1  | 4  | 3  | NA | NA | NA |
| Panc-AdenoCA    | 1a0ef226-41a5-4b56-9078-4b7834f0c976 | 2  | 240654718 | 240654750 | 9   | 32    | NA | 2  | 3  | 4  | NA | NA |
| Panc-AdenoCA    | 1a0ef226-41a5-4b56-9078-4b7834f0c976 | 4  | 65113518  | 65115209  | 9   | 1691  | 2  | 4  | 3  | NA | NA | NA |
| Panc-AdenoCA    | 1a0ef226-41a5-4b56-9078-4b7834f0c976 | 9  | 30205059  | 30205365  | 8   | 306   | 2  | 1  | 5  | NA | NA | NA |
| Panc-AdenoCA    | 1a0ef226-41a5-4b56-9078-4b7834f0c976 | 9  | 31877468  | 31882661  | 15  | 5193  | 1  | 1  | 13 | NA | NA | NA |
| Panc-AdenoCA    | 1a0ef226-41a5-4b56-9078-4b7834f0c976 | 16 | 4395617   | 4396571   | 7   | 954   | NA | 2  | 4  | NA | NA | 1  |
| Stomach-AdenoCA | 1a391468-fbf3-451a-b88e-a257a26d047f | 19 | 28396652  | 28410875  | 27  | 14223 | 8  | 9  | 10 | NA | NA | NA |
| Stomach-AdenoCA | 1a391468-fbf3-451a-b88e-a257a26d047f | 19 | 28448850  | 28453412  | 11  | 4562  | 3  | 5  | 3  | NA | NA | NA |
| Stomach-AdenoCA | 1a391468-fbf3-451a-b88e-a257a26d047f | 19 | 28881787  | 28886071  | 9   | 4284  | 1  | 4  | 3  | NA | 1  | NA |
| Stomach-AdenoCA | 1a391468-fbf3-451a-b88e-a257a26d047f | 19 | 29371828  | 29374252  | 13  | 2424  | 4  | 5  | 4  | NA | NA | NA |
| Stomach-AdenoCA | 1a391468-fbf3-451a-b88e-a257a26d047f | 19 | 29461338  | 29462907  | 8   | 1569  | NA | 1  | 7  | NA | NA | NA |
| Stomach-AdenoCA | 1a391468-fbf3-451a-b88e-a257a26d047f | 19 | 29642933  | 29646873  | 14  | 3940  | 2  | 6  | 6  | NA | NA | NA |
| Stomach-AdenoCA | 1a391468-fbf3-451a-b88e-a257a26d047f | 19 | 30272261  | 30277404  | 15  | 5143  | 5  | 5  | 5  | NA | NA | NA |
| Lymph-BNHL      | 1a4633c4-72a0-4e30-8c4c-345e04337627 | 1  | 203274956 | 203275552 | 7   | 596   | 2  | 1  | 3  | NA | NA | 1  |
| Lymph-BNHL      | 1a4633c4-72a0-4e30-8c4c-345e04337627 | 6  | 37138285  | 37140654  | 12  | 2369  | NA | 1  | 11 | NA | NA | NA |
| Lymph-BNHL      | 1a4633c4-72a0-4e30-8c4c-345e04337627 | 9  | 37025352  | 37026569  | 7   | 1217  | 1  | NA | 6  | NA | NA | NA |
| Lymph-BNHL      | 1a4633c4-72a0-4e30-8c4c-345e04337627 | 14 | 106091059 | 106094991 | 9   | 3932  | 1  | 2  | 6  | NA | NA | NA |
| Lymph-BNHL      | 1a4633c4-72a0-4e30-8c4c-345e04337627 | 14 | 106108302 | 106114499 | 54  | 6197  | 7  | 5  | 42 | NA | NA | NA |
| Lymph-BNHL      | 1a4633c4-72a0-4e30-8c4c-345e04337627 | 14 | 106208777 | 106375213 | 254 | 2E+05 | 18 | 44 | ## | 22 | 6  | 16 |
| Lymph-BNHL      | 1a4633c4-72a0-4e30-8c4c-345e04337627 | 14 | 106926355 | 106934314 | 28  | 7959  | NA | 6  | 8  | 5  | 3  | 6  |
| Lymph-BNHL      | 1a4633c4-72a0-4e30-8c4c-345e04337627 | 22 | 22568740  | 22569526  | 10  | 786   | NA | 1  | 3  | 4  | NA | 2  |
| Lymph-BNHL      | 1a4633c4-72a0-4e30-8c4c-345e04337627 | 22 | 23227979  | 23231983  | 18  | 4004  | 2  | 2  | 12 | 1  | NA | 1  |

|               |                                      |    |           |           |    |       |    |    |    |    |    |    |
|---------------|--------------------------------------|----|-----------|-----------|----|-------|----|----|----|----|----|----|
| Panc-AdenoCA  | 1a841850-fca0-48ab-8c78-db0bd5a64435 | 3  | 84475238  | 84481241  | 12 | 6003  | NA | 3  | 9  | NA | NA | NA |
| Panc-AdenoCA  | 1a841850-fca0-48ab-8c78-db0bd5a64435 | 7  | 16270991  | 16272857  | 8  | 1866  | NA | 3  | 5  | NA | NA | NA |
| Panc-AdenoCA  | 1a841850-fca0-48ab-8c78-db0bd5a64435 | 7  | 27225955  | 27227213  | 11 | 1258  | 2  | 3  | 6  | NA | NA | NA |
| Panc-AdenoCA  | 1a841850-fca0-48ab-8c78-db0bd5a64435 | 9  | 26622789  | 26627014  | 19 | 4225  | 1  | 5  | 13 | NA | NA | NA |
| Panc-AdenoCA  | 1a841850-fca0-48ab-8c78-db0bd5a64435 | 10 | 84786127  | 84790035  | 12 | 3908  | 1  | 4  | 7  | NA | NA | NA |
| Panc-AdenoCA  | 1a841850-fca0-48ab-8c78-db0bd5a64435 | 18 | 19064985  | 19067205  | 8  | 2220  | NA | 1  | 7  | NA | NA | NA |
| Panc-AdenoCA  | 1a841850-fca0-48ab-8c78-db0bd5a64435 | 18 | 19297358  | 19298162  | 10 | 804   | 1  | NA | 9  | NA | NA | NA |
| Panc-AdenoCA  | 1a841850-fca0-48ab-8c78-db0bd5a64435 | 18 | 22429021  | 22434787  | 8  | 5766  | 1  | 2  | 3  | NA | 1  | 1  |
| Skin-Melanoma | 1ac15380-04a2-42dd-8ade-28556a570e80 | 1  | 19680187  | 19686251  | 15 | 6064  | 4  | 2  | 9  | NA | NA | NA |
| Skin-Melanoma | 1ac15380-04a2-42dd-8ade-28556a570e80 | 1  | 21849931  | 21852094  | 10 | 2163  | 2  | 3  | 5  | NA | NA | NA |
| Skin-Melanoma | 1ac15380-04a2-42dd-8ade-28556a570e80 | 1  | 22438518  | 22439353  | 8  | 835   | NA | 4  | 4  | NA | NA | NA |
| Skin-Melanoma | 1ac15380-04a2-42dd-8ade-28556a570e80 | 1  | 30028117  | 30032867  | 8  | 4750  | 1  | 2  | 5  | NA | NA | NA |
| Skin-Melanoma | 1ac15380-04a2-42dd-8ade-28556a570e80 | 1  | 30619637  | 30623945  | 14 | 4308  | 2  | 9  | 2  | NA | 1  | NA |
| Skin-Melanoma | 1ac15380-04a2-42dd-8ade-28556a570e80 | 1  | 48065546  | 48068069  | 7  | 2523  | NA | NA | 7  | NA | NA | NA |
| Skin-Melanoma | 1ac15380-04a2-42dd-8ade-28556a570e80 | 1  | 49105852  | 49110786  | 10 | 4934  | NA | 4  | 6  | NA | NA | NA |
| Skin-Melanoma | 1ac15380-04a2-42dd-8ade-28556a570e80 | 1  | 50161663  | 50162644  | 9  | 981   | 2  | 4  | 3  | NA | NA | NA |
| Skin-Melanoma | 1ac15380-04a2-42dd-8ade-28556a570e80 | 1  | 237591836 | 237592560 | 7  | 724   | NA | 3  | 4  | NA | NA | NA |
| Skin-Melanoma | 1ac15380-04a2-42dd-8ade-28556a570e80 | 2  | 1525905   | 1525935   | 6  | 30    | NA | 1  | 2  | 2  | 1  | NA |
| Skin-Melanoma | 1ac15380-04a2-42dd-8ade-28556a570e80 | 2  | 232441250 | 232442589 | 7  | 1339  | NA | NA | 7  | NA | NA | NA |
| Skin-Melanoma | 1ac15380-04a2-42dd-8ade-28556a570e80 | 5  | 3796904   | 3797360   | 7  | 456   | NA | NA | 7  | NA | NA | NA |
| Skin-Melanoma | 1ac15380-04a2-42dd-8ade-28556a570e80 | 5  | 17945974  | 17951591  | 9  | 5617  | 1  | 2  | 6  | NA | NA | NA |
| Skin-Melanoma | 1ac15380-04a2-42dd-8ade-28556a570e80 | 5  | 42487372  | 42490540  | 14 | 3168  | 5  | 4  | 5  | NA | NA | NA |
| Skin-Melanoma | 1ac15380-04a2-42dd-8ade-28556a570e80 | 5  | 167162274 | 167165050 | 12 | 2776  | 2  | 3  | 7  | NA | NA | NA |
| Skin-Melanoma | 1ac15380-04a2-42dd-8ade-28556a570e80 | 5  | 174187497 | 174190005 | 12 | 2508  | 2  | 5  | 4  | NA | 1  | NA |
| Skin-Melanoma | 1ac15380-04a2-42dd-8ade-28556a570e80 | 9  | 24544568  | 24547168  | 15 | 2600  | 2  | 7  | 6  | NA | NA | NA |
| Skin-Melanoma | 1ac15380-04a2-42dd-8ade-28556a570e80 | 12 | 48311968  | 48320722  | 14 | 8754  | 1  | 4  | 8  | NA | NA | 1  |
| Skin-Melanoma | 1ac15380-04a2-42dd-8ade-28556a570e80 | 12 | 49910278  | 49910741  | 8  | 463   | 2  | 1  | 5  | NA | NA | NA |
| Skin-Melanoma | 1ac15380-04a2-42dd-8ade-28556a570e80 | 12 | 58008522  | 58010400  | 9  | 1878  | NA | NA | 9  | NA | NA | NA |
| Skin-Melanoma | 1ac15380-04a2-42dd-8ade-28556a570e80 | 12 | 67259642  | 67267193  | 11 | 7551  | 1  | 6  | 4  | NA | NA | NA |
| Skin-Melanoma | 1ac15380-04a2-42dd-8ade-28556a570e80 | 12 | 69288427  | 69292085  | 7  | 3658  | 1  | 1  | 5  | NA | NA | NA |
| Skin-Melanoma | 1ac15380-04a2-42dd-8ade-28556a570e80 | 12 | 69559045  | 69565395  | 11 | 6350  | NA | 4  | 7  | NA | NA | NA |
| Skin-Melanoma | 1ac15380-04a2-42dd-8ade-28556a570e80 | 12 | 69712493  | 69713712  | 8  | 1219  | NA | 5  | 3  | NA | NA | NA |
| Skin-Melanoma | 1ac15380-04a2-42dd-8ade-28556a570e80 | 12 | 69958424  | 69958684  | 7  | 260   | NA | 2  | 5  | NA | NA | NA |
| Skin-Melanoma | 1ac15380-04a2-42dd-8ade-28556a570e80 | 12 | 70523831  | 70529033  | 7  | 5202  | 1  | 1  | 5  | NA | NA | NA |
| Skin-Melanoma | 1ac15380-04a2-42dd-8ade-28556a570e80 | 12 | 70532174  | 70543292  | 13 | 11118 | 2  | 6  | 5  | NA | NA | NA |
| Skin-Melanoma | 1ac15380-04a2-42dd-8ade-28556a570e80 | 12 | 70592971  | 70593396  | 8  | 425   | NA | 4  | 4  | NA | NA | NA |
| Skin-Melanoma | 1ac15380-04a2-42dd-8ade-28556a570e80 | 12 | 70703599  | 70704610  | 11 | 1011  | NA | 1  | 10 | NA | NA | NA |
| Skin-Melanoma | 1ac15380-04a2-42dd-8ade-28556a570e80 | 12 | 71827719  | 71844071  | 29 | 16352 | 1  | 9  | 19 | NA | NA | NA |
| Skin-Melanoma | 1ac15380-04a2-42dd-8ade-28556a570e80 | 12 | 71944033  | 71948795  | 8  | 4762  | NA | 2  | 6  | NA | NA | NA |
| Skin-Melanoma | 1ac15380-04a2-42dd-8ade-28556a570e80 | 12 | 71984327  | 71986404  | 8  | 2077  | NA | 5  | 3  | NA | NA | NA |
| Skin-Melanoma | 1ac15380-04a2-42dd-8ade-28556a570e80 | 12 | 71997829  | 71998704  | 10 | 875   | 2  | 6  | 2  | NA | NA | NA |
| Skin-Melanoma | 1ac15380-04a2-42dd-8ade-28556a570e80 | 12 | 73011327  | 73012077  | 8  | 750   | 2  | 1  | 5  | NA | NA | NA |
| Skin-Melanoma | 1ac15380-04a2-42dd-8ade-28556a570e80 | 12 | 83320759  | 83320956  | 7  | 197   | NA | 4  | 2  | NA | NA | 1  |
| Skin-Melanoma | 1ac15380-04a2-42dd-8ade-28556a570e80 | 12 | 84107696  | 84108138  | 7  | 442   | NA | 5  | 2  | NA | NA | NA |
| Skin-Melanoma | 1ac15380-04a2-42dd-8ade-28556a570e80 | 12 | 84657435  | 84680030  | 35 | 22595 | 4  | 8  | 21 | 1  | 1  | NA |
| Skin-Melanoma | 1ac15380-04a2-42dd-8ade-28556a570e80 | 12 | 85734195  | 85739998  | 8  | 5803  | NA | 2  | 6  | NA | NA | NA |
| Skin-Melanoma | 1ac15380-04a2-42dd-8ade-28556a570e80 | 12 | 86155711  | 86156534  | 8  | 823   | NA | NA | 8  | NA | NA | NA |
| Skin-Melanoma | 1ac15380-04a2-42dd-8ade-28556a570e80 | 12 | 86336848  | 86337712  | 7  | 864   | 1  | 6  | NA | NA | NA | NA |
| Skin-Melanoma | 1ac15380-04a2-42dd-8ade-28556a570e80 | 12 | 115678667 | 115681400 | 15 | 2733  | 2  | 7  | 5  | NA | 1  | NA |
| Skin-Melanoma | 1ac15380-04a2-42dd-8ade-28556a570e80 | 12 | 122494623 | 122495238 | 7  | 615   | NA | NA | 7  | NA | NA | NA |
| Panc-AdenoCA  | 1ac54c6e-a1e4-4f3b-b4a5-cdb327e0dca6 | 4  | 66250943  | 66251913  | 6  | 970   | 1  | 2  | 3  | NA | NA | NA |
| Panc-AdenoCA  | 1ac54c6e-a1e4-4f3b-b4a5-cdb327e0dca6 | 4  | 66691733  | 66692794  | 10 | 1061  | 2  | 4  | 4  | NA | NA | NA |
| Panc-AdenoCA  | 1ac54c6e-a1e4-4f3b-b4a5-cdb327e0dca6 | X  | 72590829  | 72594406  | 6  | 3577  | 1  | 2  | 3  | NA | NA | NA |
| Head-SCC      | 1aff91a6-1b0f-4575-8f4b-4e064a50b886 | 6  | 97556427  | 97557547  | 6  | 1120  | 3  | 1  | 2  | NA | NA | NA |
| Head-SCC      | 1aff91a6-1b0f-4575-8f4b-4e064a50b886 | 7  | 22487775  | 22488439  | 11 | 664   | NA | 6  | 5  | NA | NA | NA |
| Head-SCC      | 1aff91a6-1b0f-4575-8f4b-4e064a50b886 | 8  | 100774612 | 100778662 | 8  | 4050  | 2  | 1  | 5  | NA | NA | NA |
| Head-SCC      | 1aff91a6-1b0f-4575-8f4b-4e064a50b886 | 9  | 37094954  | 37095165  | 8  | 211   | 2  | 2  | 4  | NA | NA | NA |
| Panc-AdenoCA  | 1b0fe1d5-b286-4f49-ae92-94d9c6db9657 | 4  | 81478176  | 81480263  | 13 | 2087  | 1  | 3  | 9  | NA | NA | NA |
| Panc-AdenoCA  | 1b0fe1d5-b286-4f49-ae92-94d9c6db9657 | 21 | 22365346  | 22365740  | 8  | 394   | 3  | 2  | 3  | NA | NA | NA |
| Lymph-BNHL    | 1b1780d5-06da-40ee-9e15-02631a68027b | 2  | 168981735 | 168982183 | 7  | 448   | NA | NA | NA | 2  | 3  | 2  |



|                 |                                      |    |           |           |     |       |    |    |    |    |    |    |
|-----------------|--------------------------------------|----|-----------|-----------|-----|-------|----|----|----|----|----|----|
| Lymph-BNHL      | 1b1780d5-06da-40ee-9e15-02631a68027b | 3  | 176913235 | 176913441 | 7   | 206   | NA | NA | NA | 5  | NA | 2  |
| Lymph-BNHL      | 1b1780d5-06da-40ee-9e15-02631a68027b | 3  | 187461365 | 187464230 | 30  | 2865  | 2  | 4  | 13 | 5  | 3  | 3  |
| Lymph-BNHL      | 1b1780d5-06da-40ee-9e15-02631a68027b | 3  | 187957842 | 187959776 | 15  | 1934  | NA | 1  | NA | 6  | 2  | 6  |
| Lymph-BNHL      | 1b1780d5-06da-40ee-9e15-02631a68027b | 5  | 35269716  | 35274061  | 29  | 4345  | 1  | 1  | 1  | 12 | 5  | 9  |
| Lymph-BNHL      | 1b1780d5-06da-40ee-9e15-02631a68027b | 5  | 62903764  | 62905926  | 8   | 2162  | 1  | 2  | 1  | 1  | 1  | 2  |
| Lymph-BNHL      | 1b1780d5-06da-40ee-9e15-02631a68027b | 6  | 70870652  | 70874193  | 6   | 3541  | NA | NA | NA | 3  | 3  | NA |
| Lymph-BNHL      | 1b1780d5-06da-40ee-9e15-02631a68027b | 7  | 40846502  | 40846641  | 6   | 139   | NA | NA | 1  | 3  | 1  | 1  |
| Lymph-BNHL      | 1b1780d5-06da-40ee-9e15-02631a68027b | 8  | 71217507  | 71217997  | 8   | 490   | NA | NA | 1  | 4  | 2  | 1  |
| Lymph-BNHL      | 1b1780d5-06da-40ee-9e15-02631a68027b | 11 | 49224297  | 49226582  | 6   | 2285  | NA | 4  | 1  | NA | NA | 1  |
| Lymph-BNHL      | 1b1780d5-06da-40ee-9e15-02631a68027b | 12 | 113493295 | 113495691 | 8   | 2396  | NA | 2  | 2  | 4  | NA | NA |
| Lymph-BNHL      | 1b1780d5-06da-40ee-9e15-02631a68027b | 13 | 46958274  | 46959803  | 12  | 1529  | NA | 2  | NA | 5  | 1  | 4  |
| Lymph-BNHL      | 1b1780d5-06da-40ee-9e15-02631a68027b | 14 | 106111576 | 106114574 | 15  | 2998  | 1  | 3  | 11 | NA | NA | NA |
| Lymph-BNHL      | 1b1780d5-06da-40ee-9e15-02631a68027b | 14 | 106209640 | 106285134 | 82  | 75494 | 8  | 24 | 44 | 3  | NA | 3  |
| Lymph-BNHL      | 1b1780d5-06da-40ee-9e15-02631a68027b | 14 | 106323366 | 106330399 | 148 | 7033  | 9  | 35 | 47 | 25 | 16 | 16 |
| Lymph-BNHL      | 1b1780d5-06da-40ee-9e15-02631a68027b | 14 | 107219069 | 107225251 | 23  | 6182  | NA | 3  | 2  | 11 | 4  | 3  |
| Lymph-BNHL      | 1b1780d5-06da-40ee-9e15-02631a68027b | 18 | 37222838  | 37226222  | 6   | 3384  | NA | 1  | NA | 1  | 2  | 2  |
| Lymph-BNHL      | 1b1780d5-06da-40ee-9e15-02631a68027b | 22 | 23154492  | 23165563  | 34  | 11071 | 1  | 6  | 14 | 7  | 3  | 3  |
| Lymph-BNHL      | 1b1780d5-06da-40ee-9e15-02631a68027b | 22 | 23223180  | 23248876  | 38  | 25696 | 3  | 4  | 16 | 7  | 6  | 2  |
| Stomach-AdenoCA | 1b8fe07d-859c-4d91-ade1-6b2bcb5774ce | 6  | 53323000  | 53325568  | 12  | 2568  | 5  | 2  | 4  | 1  | NA | NA |
| Stomach-AdenoCA | 1b8fe07d-859c-4d91-ade1-6b2bcb5774ce | 6  | 53422046  | 53426058  | 20  | 4012  | 5  | 10 | 5  | NA | NA | NA |
| Stomach-AdenoCA | 1b8fe07d-859c-4d91-ade1-6b2bcb5774ce | 11 | 82754591  | 82758423  | 19  | 3832  | 8  | 7  | 4  | NA | NA | NA |
| Eso-AdenoCa     | 1bb2bdb7-8a89-4e7d-903d-03a6f8018efb | 8  | 18069417  | 18071928  | 7   | 2511  | 1  | 4  | 2  | NA | NA | NA |
| Eso-AdenoCa     | 1bb2bdb7-8a89-4e7d-903d-03a6f8018efb | 21 | 17061318  | 17062366  | 6   | 1048  | 1  | 2  | 3  | NA | NA | NA |
| Ovary-AdenoCA   | 1be8fa2c-8fea-4e8c-90db-c04d9fcdbf49 | 1  | 43180718  | 43180864  | 8   | 146   | NA | NA | 8  | NA | NA | NA |
| Ovary-AdenoCA   | 1be8fa2c-8fea-4e8c-90db-c04d9fcdbf49 | 7  | 96104085  | 96111749  | 13  | 7664  | 1  | 3  | 9  | NA | NA | NA |
| Ovary-AdenoCA   | 1be8fa2c-8fea-4e8c-90db-c04d9fcdbf49 | 7  | 128591373 | 128595108 | 7   | 3735  | 1  | 1  | 5  | NA | NA | NA |
| Ovary-AdenoCA   | 1be8fa2c-8fea-4e8c-90db-c04d9fcdbf49 | 8  | 2134658   | 2139130   | 23  | 4472  | 3  | 11 | 9  | NA | NA | NA |
| Ovary-AdenoCA   | 1be8fa2c-8fea-4e8c-90db-c04d9fcdbf49 | 8  | 4458318   | 4460262   | 9   | 1944  | 1  | 1  | 7  | NA | NA | NA |
| Ovary-AdenoCA   | 1be8fa2c-8fea-4e8c-90db-c04d9fcdbf49 | 9  | 139409310 | 139410737 | 12  | 1427  | 1  | 2  | 9  | NA | NA | NA |
| Liver-HCC       | 1c00925b-7328-4db0-b930-04aab2d80719 | 8  | 69055300  | 69058031  | 9   | 2731  | NA | 6  | 3  | NA | NA | NA |
| Liver-HCC       | 1c00925b-7328-4db0-b930-04aab2d80719 | 10 | 573904    | 604640    | 36  | 30736 | 4  | 2  | 7  | 13 | 7  | 3  |
| Liver-HCC       | 1c00925b-7328-4db0-b930-04aab2d80719 | 10 | 615923    | 631592    | 19  | 15669 | 1  | 1  | 3  | 9  | 2  | 3  |
| Liver-HCC       | 1c00925b-7328-4db0-b930-04aab2d80719 | 10 | 635719    | 700033    | 85  | 64314 | 8  | 6  | 32 | 25 | 8  | 6  |
| Breast-AdenoCa  | 1c0e384f-7254-4afe-93c0-b3fc6c6a7894 | 2  | 76240492  | 76240843  | 6   | 351   | 1  | 3  | 2  | NA | NA | NA |
| Breast-AdenoCa  | 1c0e384f-7254-4afe-93c0-b3fc6c6a7894 | 2  | 76599000  | 76601024  | 16  | 2024  | 2  | 7  | 7  | NA | NA | NA |
| Breast-AdenoCa  | 1c0e384f-7254-4afe-93c0-b3fc6c6a7894 | 3  | 99148014  | 99156049  | 13  | 8035  | NA | 1  | NA | 3  | 6  | 3  |
| Breast-AdenoCa  | 1c0e384f-7254-4afe-93c0-b3fc6c6a7894 | 7  | 65729448  | 65729996  | 7   | 548   | 2  | 4  | 1  | NA | NA | NA |
| Breast-AdenoCa  | 1c0e384f-7254-4afe-93c0-b3fc6c6a7894 | 9  | 25062168  | 25064206  | 15  | 2038  | 5  | 9  | 1  | NA | NA | NA |
| Breast-AdenoCa  | 1c0e384f-7254-4afe-93c0-b3fc6c6a7894 | 10 | 27730823  | 27735273  | 7   | 4450  | 1  | 3  | 3  | NA | NA | NA |
| Breast-AdenoCa  | 1c0e384f-7254-4afe-93c0-b3fc6c6a7894 | 11 | 38287551  | 38290013  | 6   | 2462  | 2  | 2  | 2  | NA | NA | NA |
| Breast-AdenoCa  | 1c0e384f-7254-4afe-93c0-b3fc6c6a7894 | 12 | 38873420  | 38874527  | 6   | 1107  | 1  | 2  | 3  | NA | NA | NA |
| Breast-AdenoCa  | 1c0e384f-7254-4afe-93c0-b3fc6c6a7894 | 12 | 38926990  | 38932287  | 11  | 5297  | NA | 7  | 4  | NA | NA | NA |
| Breast-AdenoCa  | 1c0e384f-7254-4afe-93c0-b3fc6c6a7894 | 12 | 131297512 | 131300302 | 7   | 2790  | NA | 4  | 3  | NA | NA | NA |
| Breast-AdenoCa  | 1c0e384f-7254-4afe-93c0-b3fc6c6a7894 | 20 | 60489750  | 60491675  | 21  | 1925  | 1  | 2  | 18 | NA | NA | NA |
| Bone-Leiomyo    | 1c188bf5-2c99-4eb4-a774-59c75d53e643 | 1  | 160124877 | 160127319 | 6   | 2442  | 1  | 3  | 2  | NA | NA | NA |
| Bone-Leiomyo    | 1c188bf5-2c99-4eb4-a774-59c75d53e643 | 1  | 164968268 | 164973164 | 10  | 4896  | 2  | 4  | 4  | NA | NA | NA |
| Bone-Leiomyo    | 1c188bf5-2c99-4eb4-a774-59c75d53e643 | 1  | 169365444 | 169368212 | 7   | 2768  | 1  | 2  | 4  | NA | NA | NA |
| Bone-Leiomyo    | 1c188bf5-2c99-4eb4-a774-59c75d53e643 | 1  | 174499126 | 174502062 | 7   | 2936  | 1  | NA | 6  | NA | NA | NA |
| Bone-Leiomyo    | 1c188bf5-2c99-4eb4-a774-59c75d53e643 | 1  | 176420947 | 176433894 | 17  | 12947 | 4  | 5  | 7  | NA | NA | 1  |
| Bone-Leiomyo    | 1c188bf5-2c99-4eb4-a774-59c75d53e643 | 1  | 186209064 | 186215143 | 12  | 6079  | 3  | 2  | 6  | NA | NA | 1  |
| Bone-Leiomyo    | 1c188bf5-2c99-4eb4-a774-59c75d53e643 | 1  | 190758615 | 190763139 | 12  | 4524  | NA | 3  | 9  | NA | NA | NA |
| Bone-Leiomyo    | 1c188bf5-2c99-4eb4-a774-59c75d53e643 | 1  | 190929941 | 190942091 | 21  | 12150 | 1  | 14 | 6  | NA | NA | NA |
| Bone-Leiomyo    | 1c188bf5-2c99-4eb4-a774-59c75d53e643 | 1  | 210133005 | 210133405 | 7   | 400   | 1  | 5  | 1  | NA | NA | NA |
| Bone-Leiomyo    | 1c188bf5-2c99-4eb4-a774-59c75d53e643 | 1  | 211232305 | 211237449 | 7   | 5144  | 2  | 2  | 1  | NA | NA | 2  |
| Bone-Leiomyo    | 1c188bf5-2c99-4eb4-a774-59c75d53e643 | 1  | 223842909 | 223845269 | 10  | 2360  | 1  | 5  | 4  | NA | NA | NA |
| Bone-Leiomyo    | 1c188bf5-2c99-4eb4-a774-59c75d53e643 | 1  | 238649417 | 238650021 | 9   | 604   | 1  | 3  | 4  | NA | 1  | NA |
| Bone-Leiomyo    | 1c188bf5-2c99-4eb4-a774-59c75d53e643 | 1  | 238711093 | 238725080 | 17  | 13987 | 5  | 4  | 8  | NA | NA | NA |
| Bone-Leiomyo    | 1c188bf5-2c99-4eb4-a774-59c75d53e643 | 2  | 104274851 | 104279539 | 6   | 4688  | 1  | 4  | 1  | NA | NA | NA |
| Bone-Leiomyo    | 1c188bf5-2c99-4eb4-a774-59c75d53e643 | 2  | 122314500 | 122318151 | 14  | 3651  | 1  | 6  | 7  | NA | NA | NA |
| Bone-Leiomyo    | 1c188bf5-2c99-4eb4-a774-59c75d53e643 | 3  | 51135761  | 51138983  | 7   | 3222  | 2  | 2  | 3  | NA | NA | NA |

|               |                                      |    |           |           |    |      |    |    |    |    |    |    |
|---------------|--------------------------------------|----|-----------|-----------|----|------|----|----|----|----|----|----|
| Bone-Leiomyo  | 1c188bf5-2c99-4eb4-a774-59c75d53e643 | 3  | 80818277  | 80823439  | 11 | 5162 | NA | 7  | 3  | 1  | NA | NA |
| Bone-Leiomyo  | 1c188bf5-2c99-4eb4-a774-59c75d53e643 | 3  | 163218043 | 163223876 | 9  | 5833 | 2  | NA | 7  | NA | NA | NA |
| Bone-Leiomyo  | 1c188bf5-2c99-4eb4-a774-59c75d53e643 | 5  | 53419576  | 53422104  | 11 | 2528 | 1  | 5  | 5  | NA | NA | NA |
| Bone-Leiomyo  | 1c188bf5-2c99-4eb4-a774-59c75d53e643 | 6  | 99342747  | 99345160  | 6  | 2413 | 1  | 3  | 2  | NA | NA | NA |
| Bone-Leiomyo  | 1c188bf5-2c99-4eb4-a774-59c75d53e643 | 6  | 101035319 | 101036304 | 8  | 985  | NA | 8  | NA | NA | NA | NA |
| Bone-Leiomyo  | 1c188bf5-2c99-4eb4-a774-59c75d53e643 | 7  | 30130932  | 30132141  | 6  | 1209 | 1  | 4  | 1  | NA | NA | NA |
| Bone-Leiomyo  | 1c188bf5-2c99-4eb4-a774-59c75d53e643 | 7  | 32171598  | 32172939  | 9  | 1341 | 2  | 4  | 3  | NA | NA | NA |
| Bone-Leiomyo  | 1c188bf5-2c99-4eb4-a774-59c75d53e643 | 9  | 1955243   | 1958001   | 7  | 2758 | 1  | 5  | 1  | NA | NA | NA |
| Bone-Leiomyo  | 1c188bf5-2c99-4eb4-a774-59c75d53e643 | 9  | 7983535   | 7989378   | 7  | 5843 | NA | 5  | 2  | NA | NA | NA |
| Bone-Leiomyo  | 1c188bf5-2c99-4eb4-a774-59c75d53e643 | 9  | 22730602  | 22731420  | 7  | 818  | NA | 3  | 4  | NA | NA | NA |
| Bone-Leiomyo  | 1c188bf5-2c99-4eb4-a774-59c75d53e643 | 11 | 114512117 | 114512857 | 8  | 740  | 2  | 3  | 3  | NA | NA | NA |
| Bone-Leiomyo  | 1c188bf5-2c99-4eb4-a774-59c75d53e643 | 11 | 114532333 | 114532714 | 7  | 381  | NA | 4  | 3  | NA | NA | NA |
| Bone-Leiomyo  | 1c188bf5-2c99-4eb4-a774-59c75d53e643 | 11 | 125452412 | 125453833 | 12 | 1421 | NA | 7  | 5  | NA | NA | NA |
| Bone-Leiomyo  | 1c188bf5-2c99-4eb4-a774-59c75d53e643 | 12 | 59991922  | 59998172  | 13 | 6250 | 2  | 8  | 3  | NA | NA | NA |
| Bone-Leiomyo  | 1c188bf5-2c99-4eb4-a774-59c75d53e643 | 12 | 60995841  | 61002255  | 10 | 6414 | NA | NA | 9  | NA | NA | 1  |
| Bone-Leiomyo  | 1c188bf5-2c99-4eb4-a774-59c75d53e643 | 12 | 61905021  | 61908335  | 10 | 3314 | NA | 2  | 8  | NA | NA | NA |
| Bone-Leiomyo  | 1c188bf5-2c99-4eb4-a774-59c75d53e643 | 12 | 66385562  | 66388379  | 13 | 2817 | 3  | 4  | 6  | NA | NA | NA |
| Bone-Leiomyo  | 1c188bf5-2c99-4eb4-a774-59c75d53e643 | 12 | 67341824  | 67345683  | 7  | 3859 | 1  | 4  | 1  | NA | 1  | NA |
| Bone-Leiomyo  | 1c188bf5-2c99-4eb4-a774-59c75d53e643 | 12 | 69160149  | 69161690  | 7  | 1541 | NA | NA | 7  | NA | NA | NA |
| Bone-Leiomyo  | 1c188bf5-2c99-4eb4-a774-59c75d53e643 | 12 | 69324364  | 69328360  | 7  | 3996 | 3  | NA | 3  | 1  | NA | NA |
| Bone-Leiomyo  | 1c188bf5-2c99-4eb4-a774-59c75d53e643 | 12 | 69845209  | 69850028  | 7  | 4819 | 2  | 2  | 2  | NA | NA | 1  |
| Bone-Leiomyo  | 1c188bf5-2c99-4eb4-a774-59c75d53e643 | 12 | 74987014  | 74988706  | 7  | 1692 | 1  | 5  | NA | NA | NA | 1  |
| Bone-Leiomyo  | 1c188bf5-2c99-4eb4-a774-59c75d53e643 | 12 | 76509163  | 76514018  | 12 | 4855 | 1  | 5  | 6  | NA | NA | NA |
| Bone-Leiomyo  | 1c188bf5-2c99-4eb4-a774-59c75d53e643 | 13 | 84194035  | 84196241  | 15 | 2206 | 4  | 11 | NA | NA | NA | NA |
| Bone-Leiomyo  | 1c188bf5-2c99-4eb4-a774-59c75d53e643 | 13 | 85044130  | 85048580  | 26 | 4450 | 4  | 14 | 8  | NA | NA | NA |
| Bone-Leiomyo  | 1c188bf5-2c99-4eb4-a774-59c75d53e643 | 14 | 73467267  | 73468121  | 6  | 854  | NA | 2  | 4  | NA | NA | NA |
| Bone-Leiomyo  | 1c188bf5-2c99-4eb4-a774-59c75d53e643 | 14 | 83010367  | 83011600  | 8  | 1233 | 2  | 3  | 3  | NA | NA | NA |
| Bone-Leiomyo  | 1c188bf5-2c99-4eb4-a774-59c75d53e643 | 14 | 99256967  | 99259908  | 15 | 2941 | 3  | 7  | 5  | NA | NA | NA |
| Bone-Leiomyo  | 1c188bf5-2c99-4eb4-a774-59c75d53e643 | 14 | 99726175  | 99726899  | 7  | 724  | 1  | 2  | 4  | NA | NA | NA |
| Bone-Leiomyo  | 1c188bf5-2c99-4eb4-a774-59c75d53e643 | 15 | 31125465  | 31128556  | 11 | 3091 | 2  | 4  | 5  | NA | NA | NA |
| Bone-Leiomyo  | 1c188bf5-2c99-4eb4-a774-59c75d53e643 | 15 | 96524291  | 96531890  | 11 | 7599 | NA | 6  | 5  | NA | NA | NA |
| Bone-Leiomyo  | 1c188bf5-2c99-4eb4-a774-59c75d53e643 | X  | 68129205  | 68131134  | 9  | 1929 | NA | 6  | 3  | NA | NA | NA |
| Panc-AdenoCA  | 1c28e44a-6e6c-44ed-b58a-e3262c0e6759 | 1  | 48398000  | 48399022  | 6  | 1022 | NA | 1  | 5  | NA | NA | NA |
| Panc-AdenoCA  | 1c28e44a-6e6c-44ed-b58a-e3262c0e6759 | 2  | 230905494 | 230905978 | 14 | 484  | 2  | 4  | 8  | NA | NA | NA |
| Panc-AdenoCA  | 1c28e44a-6e6c-44ed-b58a-e3262c0e6759 | 3  | 22269979  | 22270356  | 6  | 377  | NA | 1  | 5  | NA | NA | NA |
| Panc-AdenoCA  | 1c28e44a-6e6c-44ed-b58a-e3262c0e6759 | 3  | 31053637  | 31054227  | 15 | 590  | 3  | 3  | 9  | NA | NA | NA |
| Panc-AdenoCA  | 1c28e44a-6e6c-44ed-b58a-e3262c0e6759 | 3  | 31862750  | 31863739  | 10 | 989  | 2  | 4  | 4  | NA | NA | NA |
| Panc-AdenoCA  | 1c28e44a-6e6c-44ed-b58a-e3262c0e6759 | 3  | 146986466 | 146988338 | 11 | 1872 | 2  | 5  | 4  | NA | NA | NA |
| Panc-AdenoCA  | 1c28e44a-6e6c-44ed-b58a-e3262c0e6759 | 3  | 147937362 | 147940145 | 17 | 2783 | 1  | 6  | 10 | NA | NA | NA |
| Panc-AdenoCA  | 1c28e44a-6e6c-44ed-b58a-e3262c0e6759 | 4  | 160441134 | 160441363 | 6  | 229  | NA | 2  | 4  | NA | NA | NA |
| Panc-AdenoCA  | 1c28e44a-6e6c-44ed-b58a-e3262c0e6759 | 6  | 167557404 | 167560822 | 17 | 3418 | 2  | 7  | 8  | NA | NA | NA |
| Panc-AdenoCA  | 1c28e44a-6e6c-44ed-b58a-e3262c0e6759 | 9  | 21980476  | 21980564  | 6  | 88   | NA | NA | 6  | NA | NA | NA |
| Panc-AdenoCA  | 1c28e44a-6e6c-44ed-b58a-e3262c0e6759 | 11 | 107654277 | 107654686 | 7  | 409  | 1  | 3  | 3  | NA | NA | NA |
| Panc-AdenoCA  | 1c28e44a-6e6c-44ed-b58a-e3262c0e6759 | 13 | 20297547  | 20303092  | 13 | 5545 | 4  | 3  | 6  | NA | NA | NA |
| Panc-AdenoCA  | 1c28e44a-6e6c-44ed-b58a-e3262c0e6759 | 13 | 21080983  | 21082549  | 15 | 1566 | 1  | 2  | 12 | NA | NA | NA |
| Panc-AdenoCA  | 1c28e44a-6e6c-44ed-b58a-e3262c0e6759 | 13 | 22015383  | 22016270  | 15 | 887  | 2  | 2  | 11 | NA | NA | NA |
| Panc-AdenoCA  | 1c28e44a-6e6c-44ed-b58a-e3262c0e6759 | 13 | 22328920  | 22331949  | 9  | 3029 | 3  | 2  | 4  | NA | NA | NA |
| Panc-AdenoCA  | 1c28e44a-6e6c-44ed-b58a-e3262c0e6759 | 13 | 23527754  | 23528879  | 7  | 1125 | NA | 1  | 6  | NA | NA | NA |
| Panc-AdenoCA  | 1c9f8e26-1447-4335-aaab-06d6bb3e2741 | 17 | 20982569  | 20982790  | 6  | 221  | NA | 3  | 2  | NA | 1  | NA |
| Panc-AdenoCA  | 1c9f8e26-1447-4335-aaab-06d6bb3e2741 | 18 | 54306481  | 54306727  | 9  | 246  | 1  | 4  | 4  | NA | NA | NA |
| Skin-Melanoma | 1cd0acf2-3116-4dfa-a063-0a435b9f6da3 | 6  | 9541002   | 9541912   | 18 | 910  | 3  | 7  | 8  | NA | NA | NA |
| Skin-Melanoma | 1cd0acf2-3116-4dfa-a063-0a435b9f6da3 | 6  | 62560699  | 62561314  | 7  | 615  | 2  | 4  | 1  | NA | NA | NA |
| Skin-Melanoma | 1cd0acf2-3116-4dfa-a063-0a435b9f6da3 | 6  | 63045614  | 63049408  | 7  | 3794 | 2  | 4  | 1  | NA | NA | NA |
| Skin-Melanoma | 1cd0acf2-3116-4dfa-a063-0a435b9f6da3 | 6  | 63158642  | 63161002  | 9  | 2360 | NA | 8  | 1  | NA | NA | NA |
| Skin-Melanoma | 1cd0acf2-3116-4dfa-a063-0a435b9f6da3 | 6  | 63190274  | 63190517  | 13 | 243  | NA | NA | 13 | NA | NA | NA |
| Skin-Melanoma | 1cd0acf2-3116-4dfa-a063-0a435b9f6da3 | 6  | 64379391  | 64384167  | 17 | 4776 | 5  | 4  | 7  | NA | 1  | NA |
| Skin-Melanoma | 1cd0acf2-3116-4dfa-a063-0a435b9f6da3 | 11 | 11250833  | 11256878  | 11 | 6045 | 1  | 7  | 2  | NA | NA | 1  |
| Skin-Melanoma | 1cd0acf2-3116-4dfa-a063-0a435b9f6da3 | 11 | 49214646  | 49216615  | 11 | 1969 | 2  | 2  | 6  | NA | 1  | NA |
| Skin-Melanoma | 1cd0acf2-3116-4dfa-a063-0a435b9f6da3 | 11 | 68432923  | 68434654  | 7  | 1731 | NA | 6  | NA | NA | NA | 1  |
| Skin-Melanoma | 1cd0acf2-3116-4dfa-a063-0a435b9f6da3 | 11 | 73626621  | 73627202  | 8  | 581  | 4  | 2  | 2  | NA | NA | NA |

|                 |                                      |    |           |           |    |       |    |    |    |    |    |    |
|-----------------|--------------------------------------|----|-----------|-----------|----|-------|----|----|----|----|----|----|
| Skin-Melanoma   | 1cd0acf2-3116-4dfa-a063-0a435b9f6da3 | 11 | 73739696  | 73740580  | 11 | 884   | 2  | 6  | 3  | NA | NA | NA |
| Skin-Melanoma   | 1cd0acf2-3116-4dfa-a063-0a435b9f6da3 | 11 | 73927258  | 73927523  | 20 | 265   | NA | NA | 20 | NA | NA | NA |
| Skin-Melanoma   | 1cd0acf2-3116-4dfa-a063-0a435b9f6da3 | 11 | 77754585  | 77761395  | 11 | 6810  | 1  | 3  | 6  | NA | NA | 1  |
| Skin-Melanoma   | 1cd0acf2-3116-4dfa-a063-0a435b9f6da3 | 11 | 79882471  | 79892628  | 15 | 10157 | 7  | 5  | 1  | 1  | NA | 1  |
| Lymph-BNHL      | 1d1eeba2-4d7b-4380-b0b6-26d246bc4158 | 2  | 89155934  | 89161386  | 45 | 5452  | 4  | 5  | 11 | 17 | 3  | 5  |
| Lymph-BNHL      | 1d1eeba2-4d7b-4380-b0b6-26d246bc4158 | 5  | 161805143 | 161808750 | 8  | 3607  | NA | 1  | 1  | 2  | 2  | 2  |
| Lymph-BNHL      | 1d1eeba2-4d7b-4380-b0b6-26d246bc4158 | 8  | 77552637  | 77556890  | 9  | 4253  | 2  | 1  | 3  | 1  | NA | 2  |
| Lymph-BNHL      | 1d1eeba2-4d7b-4380-b0b6-26d246bc4158 | 14 | 106210944 | 106213627 | 7  | 2683  | NA | 1  | 5  | 1  | NA | NA |
| Lymph-BNHL      | 1d1eeba2-4d7b-4380-b0b6-26d246bc4158 | 14 | 106324037 | 106330348 | 87 | 6311  | 9  | 22 | 31 | 13 | 6  | 6  |
| Lymph-BNHL      | 1d1eeba2-4d7b-4380-b0b6-26d246bc4158 | 14 | 106518576 | 106519272 | 14 | 696   | NA | 1  | 6  | 6  | NA | 1  |
| Lymph-BNHL      | 1d1eeba2-4d7b-4380-b0b6-26d246bc4158 | 18 | 60983484  | 60987041  | 24 | 3557  | 2  | 4  | 11 | 4  | 1  | 2  |
| Lymph-BNHL      | 1d1eeba2-4d7b-4380-b0b6-26d246bc4158 | 22 | 23230262  | 23231920  | 16 | 1658  | NA | 2  | 4  | 7  | NA | 3  |
| Stomach-AdenoCA | 1d2d355a-8409-4c8a-9f07-ac62885e228d | 18 | 23245488  | 23250323  | 6  | 4835  | 2  | 1  | 3  | NA | NA | NA |
| Stomach-AdenoCA | 1d2d355a-8409-4c8a-9f07-ac62885e228d | 18 | 25471050  | 25484364  | 25 | 13314 | 7  | 10 | 7  | NA | 1  | NA |
| Kidney-RCC      | 1d325d84-a3a0-4802-9842-76cb21cecb1c | 3  | 55941787  | 55948123  | 17 | 6336  | 3  | 4  | 10 | NA | NA | NA |
| Head-SCC        | 1db83e80-bdf7-4d8d-8008-bd8406d641fc | 1  | 68748853  | 68750425  | 6  | 1572  | 1  | NA | 5  | NA | NA | NA |
| Head-SCC        | 1db83e80-bdf7-4d8d-8008-bd8406d641fc | 1  | 168659505 | 168662149 | 8  | 2644  | 1  | NA | 7  | NA | NA | NA |
| Head-SCC        | 1db83e80-bdf7-4d8d-8008-bd8406d641fc | 1  | 195404732 | 195406839 | 11 | 2107  | 1  | 3  | 7  | NA | NA | NA |
| Head-SCC        | 1db83e80-bdf7-4d8d-8008-bd8406d641fc | 3  | 171243867 | 171246660 | 6  | 2793  | 1  | 2  | 3  | NA | NA | NA |
| Head-SCC        | 1db83e80-bdf7-4d8d-8008-bd8406d641fc | 15 | 66642609  | 66645887  | 7  | 3278  | 3  | 2  | 2  | NA | NA | NA |
| Head-SCC        | 1db83e80-bdf7-4d8d-8008-bd8406d641fc | 22 | 38898691  | 38901756  | 10 | 3065  | 2  | 2  | 6  | NA | NA | NA |
| Liver-HCC       | 1dbdbb2c-c623-11e3-bf01-24c6515278c0 | 1  | 160318755 | 160319200 | 7  | 445   | 3  | NA | 4  | NA | NA | NA |
| Liver-HCC       | 1dbdbb2c-c623-11e3-bf01-24c6515278c0 | 11 | 69174446  | 69185524  | 29 | 11078 | 2  | 12 | 15 | NA | NA | NA |
| Ovary-AdenoCA   | 1dc9e7fd-fc62-4b32-9619-4e02a266a385 | 6  | 86245127  | 86246666  | 9  | 1539  | 1  | 5  | 3  | NA | NA | NA |
| Ovary-AdenoCA   | 1dc9e7fd-fc62-4b32-9619-4e02a266a385 | 12 | 125097652 | 125098851 | 6  | 1199  | 3  | 3  | NA | NA | NA | NA |
| Panc-AdenoCA    | 1e181878-c640-4e91-a620-3fc4b08a4de1 | 12 | 28087899  | 28088981  | 13 | 1082  | 4  | 6  | 3  | NA | NA | NA |
| CNS-GBM         | 1e27cc8a-5394-4958-9af6-5ece1fe24516 | 4  | 165742721 | 165742857 | 7  | 136   | NA | NA | 7  | NA | NA | NA |
| CNS-GBM         | 1e27cc8a-5394-4958-9af6-5ece1fe24516 | 9  | 34972546  | 34973360  | 6  | 814   | NA | 4  | 2  | NA | NA | NA |
| CNS-GBM         | 1e27cc8a-5394-4958-9af6-5ece1fe24516 | 9  | 36098292  | 36105250  | 13 | 6958  | 5  | 4  | 4  | NA | NA | NA |
| Biliary-AdenoCA | 1e2dcbcc-771c-43c5-8c8d-e0eb77cb3494 | 1  | 153038007 | 153038689 | 10 | 682   | 2  | 1  | 7  | NA | NA | NA |
| Biliary-AdenoCA | 1e2dcbcc-771c-43c5-8c8d-e0eb77cb3494 | 1  | 158641139 | 158642139 | 13 | 1000  | 2  | 5  | 6  | NA | NA | NA |
| Biliary-AdenoCA | 1e2dcbcc-771c-43c5-8c8d-e0eb77cb3494 | 1  | 164074892 | 164077803 | 8  | 2911  | 2  | 2  | 4  | NA | NA | NA |
| Biliary-AdenoCA | 1e2dcbcc-771c-43c5-8c8d-e0eb77cb3494 | 1  | 166483278 | 166483528 | 9  | 250   | NA | NA | 9  | NA | NA | NA |
| Biliary-AdenoCA | 1e2dcbcc-771c-43c5-8c8d-e0eb77cb3494 | 1  | 175651191 | 175652054 | 13 | 863   | NA | NA | 13 | NA | NA | NA |
| Biliary-AdenoCA | 1e2dcbcc-771c-43c5-8c8d-e0eb77cb3494 | 1  | 182430135 | 182433859 | 7  | 3724  | NA | 5  | 2  | NA | NA | NA |
| Biliary-AdenoCA | 1e2dcbcc-771c-43c5-8c8d-e0eb77cb3494 | 1  | 187844393 | 187845371 | 16 | 978   | NA | NA | 16 | NA | NA | NA |
| Biliary-AdenoCA | 1e2dcbcc-771c-43c5-8c8d-e0eb77cb3494 | 1  | 190206418 | 190209014 | 9  | 2596  | 2  | 4  | 3  | NA | NA | NA |
| Biliary-AdenoCA | 1e2dcbcc-771c-43c5-8c8d-e0eb77cb3494 | 1  | 190236587 | 190241590 | 8  | 5003  | 2  | NA | 6  | NA | NA | NA |
| Biliary-AdenoCA | 1e2dcbcc-771c-43c5-8c8d-e0eb77cb3494 | 1  | 192326278 | 192326955 | 8  | 677   | NA | 3  | 5  | NA | NA | NA |
| Biliary-AdenoCA | 1e2dcbcc-771c-43c5-8c8d-e0eb77cb3494 | 1  | 194466406 | 194467607 | 10 | 1201  | NA | 6  | 4  | NA | NA | NA |
| Biliary-AdenoCA | 1e2dcbcc-771c-43c5-8c8d-e0eb77cb3494 | 1  | 198783223 | 198785703 | 14 | 2480  | 3  | 1  | 9  | NA | 1  | NA |
| Biliary-AdenoCA | 1e2dcbcc-771c-43c5-8c8d-e0eb77cb3494 | 1  | 210579659 | 210580163 | 8  | 504   | NA | NA | 8  | NA | NA | NA |
| Biliary-AdenoCA | 1e2dcbcc-771c-43c5-8c8d-e0eb77cb3494 | 1  | 231304139 | 231305046 | 17 | 907   | NA | NA | 17 | NA | NA | NA |
| Biliary-AdenoCA | 1e2dcbcc-771c-43c5-8c8d-e0eb77cb3494 | 1  | 231594819 | 231595118 | 8  | 299   | NA | NA | 8  | NA | NA | NA |
| Biliary-AdenoCA | 1e2dcbcc-771c-43c5-8c8d-e0eb77cb3494 | 3  | 87811566  | 87814569  | 6  | 3003  | NA | NA | NA | 1  | 2  | 3  |
| Biliary-AdenoCA | 1e2dcbcc-771c-43c5-8c8d-e0eb77cb3494 | 7  | 70537864  | 70543244  | 7  | 5380  | 1  | 4  | 1  | NA | 1  | NA |
| Biliary-AdenoCA | 1e2dcbcc-771c-43c5-8c8d-e0eb77cb3494 | 8  | 96973261  | 96989251  | 17 | 15990 | NA | NA | NA | 4  | 8  | 5  |
| Biliary-AdenoCA | 1e2dcbcc-771c-43c5-8c8d-e0eb77cb3494 | 9  | 25372544  | 25379105  | 13 | 6561  | NA | 3  | 10 | NA | NA | NA |
| Liver-HCC       | 1ea7e01c-c623-11e3-bf01-24c6515278c0 | 2  | 44696346  | 44696529  | 6  | 183   | NA | NA | NA | 2  | 3  | 1  |
| Panc-Endocrine  | 1eb1bc62-18f6-4bc8-a16d-aa6a91914031 | 20 | 36649979  | 36654939  | 8  | 4960  | NA | NA | 8  | NA | NA | NA |
| Prost-AdenoCA   | 1eb37b28-fac2-477a-88b3-e04291a07926 | 4  | 121239423 | 121244818 | 16 | 5395  | 1  | 13 | 2  | NA | NA | NA |
| Prost-AdenoCA   | 1eb37b28-fac2-477a-88b3-e04291a07926 | 8  | 42909040  | 42911292  | 6  | 2252  | 1  | 3  | 2  | NA | NA | NA |
| Breast-AdenoCa  | 1eb62abc-7928-405b-84cc-f091ca5347b2 | 2  | 209282527 | 209285572 | 6  | 3045  | 2  | 1  | 3  | NA | NA | NA |
| Breast-AdenoCa  | 1eb62abc-7928-405b-84cc-f091ca5347b2 | 8  | 39710904  | 39713957  | 11 | 3053  | 2  | 6  | 3  | NA | NA | NA |
| Breast-AdenoCa  | 1eb62abc-7928-405b-84cc-f091ca5347b2 | 12 | 7813677   | 7814125   | 6  | 448   | NA | 5  | 1  | NA | NA | NA |
| Breast-AdenoCa  | 1eb62abc-7928-405b-84cc-f091ca5347b2 | 12 | 34336953  | 34337871  | 13 | 918   | 5  | 7  | NA | NA | 1  | NA |
| Stomach-AdenoCA | 1f2a8889-4374-4037-bb56-0f20733380e3 | 7  | 10275489  | 10275648  | 6  | 159   | 2  | 1  | 3  | NA | NA | NA |
| Stomach-AdenoCA | 1f2a8889-4374-4037-bb56-0f20733380e3 | 7  | 82923546  | 82923869  | 10 | 323   | 1  | 1  | 8  | NA | NA | NA |
| Stomach-AdenoCA | 1f2a8889-4374-4037-bb56-0f20733380e3 | 7  | 85563238  | 85567359  | 12 | 4121  | 7  | 3  | 2  | NA | NA | NA |
| Stomach-AdenoCA | 1f2a8889-4374-4037-bb56-0f20733380e3 | 12 | 9764032   | 9764078   | 6  | 46    | 1  | 1  | 2  | 1  | NA | 1  |

|                 |                                      |    |           |           |    |       |    |    |    |    |    |    |
|-----------------|--------------------------------------|----|-----------|-----------|----|-------|----|----|----|----|----|----|
| Stomach-AdenoCA | 1f2a8889-4374-4037-bb56-0f20733380e3 | 19 | 30738991  | 30744644  | 9  | 5653  | 2  | 3  | 4  | NA | NA | NA |
| Panc-AdenoCA    | 1f81a1b0-8089-44ef-87b5-b3359a407ad2 | 8  | 130569744 | 130573141 | 8  | 3397  | 1  | 4  | 3  | NA | NA | NA |
| Panc-AdenoCA    | 1f81a1b0-8089-44ef-87b5-b3359a407ad2 | 10 | 64730490  | 64731134  | 10 | 644   | NA | 8  | 2  | NA | NA | NA |
| Panc-AdenoCA    | 1f81a1b0-8089-44ef-87b5-b3359a407ad2 | 17 | 1911636   | 1913722   | 7  | 2086  | 3  | 2  | 2  | NA | NA | NA |
| Panc-AdenoCA    | 1f81a1b0-8089-44ef-87b5-b3359a407ad2 | 18 | 718448    | 720805    | 17 | 2357  | 4  | 10 | 3  | NA | NA | NA |
| Panc-AdenoCA    | 1f81a1b0-8089-44ef-87b5-b3359a407ad2 | 18 | 19938732  | 19940585  | 11 | 1853  | 2  | 6  | 3  | NA | NA | NA |
| Panc-AdenoCA    | 1f81a1b0-8089-44ef-87b5-b3359a407ad2 | 19 | 933044    | 936971    | 10 | 3927  | 2  | 4  | 4  | NA | NA | NA |
| Panc-AdenoCA    | 1f81a1b0-8089-44ef-87b5-b3359a407ad2 | 19 | 27925996  | 27929855  | 18 | 3859  | 3  | 8  | 7  | NA | NA | NA |
| Panc-AdenoCA    | 1f81a1b0-8089-44ef-87b5-b3359a407ad2 | 19 | 40354056  | 40355243  | 8  | 1187  | 2  | 3  | 3  | NA | NA | NA |
| Panc-AdenoCA    | 1f81a1b0-8089-44ef-87b5-b3359a407ad2 | 20 | 11643025  | 11643994  | 6  | 969   | NA | 4  | 2  | NA | NA | NA |
| Panc-AdenoCA    | 1f81a1b0-8089-44ef-87b5-b3359a407ad2 | 20 | 23430916  | 23431978  | 10 | 1062  | 2  | 3  | 5  | NA | NA | NA |
| Panc-AdenoCA    | 1f81a1b0-8089-44ef-87b5-b3359a407ad2 | 22 | 34357274  | 34357775  | 7  | 501   | 1  | 3  | 3  | NA | NA | NA |
| Eso-AdenoCa     | 1f967003-82d6-4932-a445-24fc25723594 | 18 | 30254757  | 30255262  | 10 | 505   | 5  | NA | 5  | NA | NA | NA |
| Head-SCC        | 1fdab6a6-7346-4229-aa8d-5dbd258f0c60 | 3  | 48830662  | 48833068  | 7  | 2406  | 1  | 6  | NA | NA | NA | NA |
| Head-SCC        | 1fdab6a6-7346-4229-aa8d-5dbd258f0c60 | 7  | 133393493 | 133395204 | 6  | 1711  | NA | 4  | 2  | NA | NA | NA |
| Head-SCC        | 1fdab6a6-7346-4229-aa8d-5dbd258f0c60 | 11 | 66558179  | 66559034  | 7  | 855   | 2  | 2  | 3  | NA | NA | NA |
| Head-SCC        | 1fdab6a6-7346-4229-aa8d-5dbd258f0c60 | 16 | 67560146  | 67563864  | 9  | 3718  | NA | 2  | 7  | NA | NA | NA |
| Head-SCC        | 1ff155dd-deb4-44e0-b3a2-e4875b618435 | 4  | 189181388 | 189183536 | 6  | 2148  | NA | 1  | 5  | NA | NA | NA |
| Head-SCC        | 1ff155dd-deb4-44e0-b3a2-e4875b618435 | 7  | 107386353 | 107387803 | 8  | 1450  | NA | 4  | 4  | NA | NA | NA |
| Head-SCC        | 1ff155dd-deb4-44e0-b3a2-e4875b618435 | 12 | 104245186 | 104246939 | 7  | 1753  | NA | 4  | 2  | 1  | NA | NA |
| Head-SCC        | 1ff155dd-deb4-44e0-b3a2-e4875b618435 | 19 | 11313476  | 11321875  | 11 | 8399  | 2  | 3  | 6  | NA | NA | NA |
| Head-SCC        | 1ff155dd-deb4-44e0-b3a2-e4875b618435 | X  | 48779868  | 48782034  | 7  | 2166  | 1  | 1  | 5  | NA | NA | NA |
| Head-SCC        | 1fff8b62-534b-4d71-a65f-e5f93b8b50ed | 6  | 3217996   | 3218519   | 7  | 523   | 3  | 2  | 2  | NA | NA | NA |
| Head-SCC        | 1fff8b62-534b-4d71-a65f-e5f93b8b50ed | X  | 151690187 | 151692324 | 16 | 2137  | 2  | 12 | 2  | NA | NA | NA |
| Breast-AdenoCa  | 207f8a42-5b05-4876-b0ae-ebfaaea27844 | 3  | 89964193  | 89965074  | 7  | 881   | 5  | 2  | NA | NA | NA | NA |
| Skin-Melanoma   | 20e02396-e676-412d-9724-44a428919cdb | 6  | 66959607  | 66963344  | 14 | 3737  | 2  | 3  | 7  | 1  | NA | 1  |
| Skin-Melanoma   | 20e02396-e676-412d-9724-44a428919cdb | 6  | 67400609  | 67403339  | 9  | 2730  | NA | 3  | 6  | NA | NA | NA |
| Skin-Melanoma   | 20e02396-e676-412d-9724-44a428919cdb | 6  | 69145082  | 69152154  | 16 | 7072  | 1  | 9  | 6  | NA | NA | NA |
| Skin-Melanoma   | 20e02396-e676-412d-9724-44a428919cdb | 11 | 73563517  | 73564108  | 11 | 591   | 1  | 6  | 4  | NA | NA | NA |
| Skin-Melanoma   | 20e02396-e676-412d-9724-44a428919cdb | 11 | 78735063  | 78735670  | 7  | 607   | NA | 2  | 5  | NA | NA | NA |
| Skin-Melanoma   | 20e02396-e676-412d-9724-44a428919cdb | 11 | 81788836  | 81793457  | 7  | 4621  | 2  | 3  | 2  | NA | NA | NA |
| Skin-Melanoma   | 20e02396-e676-412d-9724-44a428919cdb | 14 | 78293212  | 78293473  | 8  | 261   | 1  | NA | 7  | NA | NA | NA |
| Skin-Melanoma   | 20e02396-e676-412d-9724-44a428919cdb | 21 | 22324303  | 22324874  | 7  | 571   | 2  | 5  | NA | NA | NA | NA |
| Skin-Melanoma   | 20e02396-e676-412d-9724-44a428919cdb | 22 | 37910034  | 37910741  | 6  | 707   | NA | 3  | 3  | NA | NA | NA |
| Panc-AdenoCA    | 2102558b-87b0-447b-bb9a-e4ae9df8b75e | 22 | 27851816  | 27852663  | 13 | 847   | NA | 2  | 9  | 1  | NA | 1  |
| Biliary-AdenoCA | 2109e1d4-c623-11e3-bf01-24c6515278c0 | 7  | 115380308 | 115384027 | 11 | 3719  | 1  | 4  | 6  | NA | NA | NA |
| Biliary-AdenoCA | 2109e1d4-c623-11e3-bf01-24c6515278c0 | 7  | 122485272 | 122490493 | 12 | 5221  | NA | 2  | 10 | NA | NA | NA |
| Biliary-AdenoCA | 2109e1d4-c623-11e3-bf01-24c6515278c0 | 20 | 21614353  | 21615869  | 6  | 1516  | NA | 2  | 4  | NA | NA | NA |
| Panc-AdenoCA    | 21b1a37f-e91e-4ce1-83cf-bb89b8d0fb35 | 13 | 78962732  | 78965760  | 6  | 3028  | 1  | 1  | 4  | NA | NA | NA |
| Panc-AdenoCA    | 21b1a37f-e91e-4ce1-83cf-bb89b8d0fb35 | 15 | 37052347  | 37052938  | 6  | 591   | 1  | 1  | 4  | NA | NA | NA |
| Panc-AdenoCA    | 21b1a37f-e91e-4ce1-83cf-bb89b8d0fb35 | 15 | 37091883  | 37092219  | 8  | 336   | 1  | 5  | 2  | NA | NA | NA |
| Panc-AdenoCA    | 21b1a37f-e91e-4ce1-83cf-bb89b8d0fb35 | 15 | 39549309  | 39553726  | 11 | 4417  | NA | 1  | 10 | NA | NA | NA |
| Panc-AdenoCA    | 228fb827-c05e-494c-8a21-e1d925e100cb | 17 | 70940219  | 70941932  | 12 | 1713  | 3  | 2  | 6  | NA | NA | 1  |
| Breast-AdenoCa  | 2290b078-6a5b-4c83-9dfb-b525bbf14e4e | 1  | 53793075  | 53802580  | 21 | 9505  | 5  | 14 | 2  | NA | NA | NA |
| Breast-AdenoCa  | 2290b078-6a5b-4c83-9dfb-b525bbf14e4e | 1  | 160672688 | 160673692 | 10 | 1004  | 1  | 8  | 1  | NA | NA | NA |
| Breast-AdenoCa  | 2290b078-6a5b-4c83-9dfb-b525bbf14e4e | 1  | 160710319 | 160710660 | 10 | 341   | 3  | 4  | 2  | NA | NA | 1  |
| Breast-AdenoCa  | 2290b078-6a5b-4c83-9dfb-b525bbf14e4e | 1  | 165658600 | 165659039 | 7  | 439   | NA | 5  | 2  | NA | NA | NA |
| Breast-AdenoCa  | 2290b078-6a5b-4c83-9dfb-b525bbf14e4e | 8  | 135606835 | 135608459 | 17 | 1624  | 4  | 11 | 2  | NA | NA | NA |
| Breast-AdenoCa  | 2290b078-6a5b-4c83-9dfb-b525bbf14e4e | 10 | 69226699  | 69232327  | 15 | 5628  | 6  | 7  | 2  | NA | NA | NA |
| Breast-AdenoCa  | 2290b078-6a5b-4c83-9dfb-b525bbf14e4e | 15 | 100503132 | 100503149 | 8  | 17    | 1  | 2  | NA | NA | 1  | 4  |
| Breast-AdenoCa  | 2290b078-6a5b-4c83-9dfb-b525bbf14e4e | 21 | 25834654  | 25835101  | 6  | 447   | NA | 4  | 2  | NA | NA | NA |
| Breast-AdenoCa  | 2290b078-6a5b-4c83-9dfb-b525bbf14e4e | X  | 133744907 | 133745526 | 6  | 619   | 1  | 2  | 3  | NA | NA | NA |
| Lymph-BNHL      | 232b7754-b3c3-4530-9d24-3af40d9b2816 | 2  | 89158235  | 89174793  | 63 | 16558 | 1  | 8  | 15 | 25 | 11 | 3  |
| Lymph-BNHL      | 232b7754-b3c3-4530-9d24-3af40d9b2816 | 6  | 140288032 | 140292923 | 6  | 4891  | NA | NA | 2  | 2  | 1  | 1  |
| Lymph-BNHL      | 232b7754-b3c3-4530-9d24-3af40d9b2816 | 8  | 16073579  | 16075862  | 10 | 2283  | NA | NA | NA | 5  | 2  | 3  |
| Lymph-BNHL      | 232b7754-b3c3-4530-9d24-3af40d9b2816 | 14 | 106112424 | 106114289 | 9  | 1865  | 2  | 1  | 6  | NA | NA | NA |
| Lymph-BNHL      | 232b7754-b3c3-4530-9d24-3af40d9b2816 | 14 | 106208882 | 106213681 | 17 | 4799  | 2  | 3  | 12 | NA | NA | NA |
| Lymph-BNHL      | 232b7754-b3c3-4530-9d24-3af40d9b2816 | 14 | 106239583 | 106241323 | 12 | 1740  | NA | 1  | 11 | NA | NA | NA |
| Lymph-BNHL      | 232b7754-b3c3-4530-9d24-3af40d9b2816 | 14 | 106324134 | 106330080 | 42 | 5946  | 1  | 8  | 17 | 7  | 2  | 7  |
| Lymph-BNHL      | 232b7754-b3c3-4530-9d24-3af40d9b2816 | 18 | 60983993  | 60986731  | 10 | 2738  | 2  | NA | 2  | 4  | NA | 2  |

|                 |                                      |    |           |           |    |      |    |    |    |    |    |    |
|-----------------|--------------------------------------|----|-----------|-----------|----|------|----|----|----|----|----|----|
| Lymph-BNHL      | 232b7754-b3c3-4530-9d24-3af40d9b2816 | 22 | 23223355  | 23227934  | 6  | 4579 | NA | 4  | 2  | NA | NA | NA |
| Lymph-BNHL      | 232b7754-b3c3-4530-9d24-3af40d9b2816 | 22 | 23230312  | 23232527  | 16 | 2215 | 1  | 3  | 5  | 1  | 1  | 5  |
| Lung-AdenoCA    | 23d86395-9e20-4cf9-bf7e-f76544a1f772 | 5  | 1172261   | 1173714   | 6  | 1453 | NA | NA | 6  | NA | NA | NA |
| Lung-AdenoCA    | 23d86395-9e20-4cf9-bf7e-f76544a1f772 | 5  | 15279764  | 15280610  | 8  | 846  | NA | NA | 8  | NA | NA | NA |
| Lung-AdenoCA    | 23d86395-9e20-4cf9-bf7e-f76544a1f772 | 8  | 79877701  | 79878368  | 6  | 667  | NA | 3  | 3  | NA | NA | NA |
| Lung-AdenoCA    | 23d86395-9e20-4cf9-bf7e-f76544a1f772 | 8  | 82208407  | 82208885  | 11 | 478  | 1  | 4  | 5  | 1  | NA | NA |
| Lung-AdenoCA    | 23d86395-9e20-4cf9-bf7e-f76544a1f772 | 8  | 93354742  | 93357578  | 7  | 2836 | NA | NA | 6  | 1  | NA | NA |
| Lung-AdenoCA    | 23d86395-9e20-4cf9-bf7e-f76544a1f772 | 9  | 33251270  | 33252802  | 7  | 1532 | 1  | 3  | 3  | NA | NA | NA |
| Lung-AdenoCA    | 23d86395-9e20-4cf9-bf7e-f76544a1f772 | 14 | 106657126 | 106657610 | 12 | 484  | NA | 4  | 8  | NA | NA | NA |
| Lung-AdenoCA    | 23d86395-9e20-4cf9-bf7e-f76544a1f772 | 16 | 16065689  | 16065928  | 9  | 239  | NA | 3  | 5  | NA | 1  | NA |
| Lung-AdenoCA    | 23d86395-9e20-4cf9-bf7e-f76544a1f772 | 16 | 90037377  | 90039329  | 8  | 1952 | NA | 4  | 4  | NA | NA | NA |
| Lung-AdenoCA    | 23d86395-9e20-4cf9-bf7e-f76544a1f772 | 17 | 79786759  | 79793422  | 8  | 6663 | NA | NA | 8  | NA | NA | NA |
| Panc-AdenoCA    | 241abdfd-e6de-4830-a233-4bbc5f622725 | 3  | 149887404 | 149891074 | 9  | 3670 | NA | 3  | 5  | NA | 1  | NA |
| Panc-AdenoCA    | 241abdfd-e6de-4830-a233-4bbc5f622725 | 6  | 90035225  | 90035881  | 10 | 656  | NA | NA | 10 | NA | NA | NA |
| Lymph-BNHL      | 2439ec74-1713-4d47-a5d9-886f69ddcb6  | 2  | 179155806 | 179160781 | 6  | 4975 | NA | NA | 1  | 3  | 2  | NA |
| Lymph-BNHL      | 2439ec74-1713-4d47-a5d9-886f69ddcb6  | 3  | 186740074 | 186740346 | 6  | 272  | 1  | NA | NA | 3  | NA | 2  |
| Lymph-BNHL      | 2439ec74-1713-4d47-a5d9-886f69ddcb6  | 3  | 188471213 | 188471754 | 8  | 541  | NA | 1  | 1  | 2  | 2  | 2  |
| Lymph-BNHL      | 2439ec74-1713-4d47-a5d9-886f69ddcb6  | 4  | 40197647  | 40200777  | 6  | 3130 | NA | 1  | 1  | 4  | NA | NA |
| Lymph-BNHL      | 2439ec74-1713-4d47-a5d9-886f69ddcb6  | 4  | 63573207  | 63575076  | 7  | 1869 | NA | NA | NA | 5  | 1  | 1  |
| Lymph-BNHL      | 2439ec74-1713-4d47-a5d9-886f69ddcb6  | 5  | 170337487 | 170342847 | 7  | 5360 | 1  | NA | NA | 5  | NA | 1  |
| Lymph-BNHL      | 2439ec74-1713-4d47-a5d9-886f69ddcb6  | 6  | 48411056  | 48412589  | 6  | 1533 | 1  | 1  | NA | 2  | 1  | 1  |
| Lymph-BNHL      | 2439ec74-1713-4d47-a5d9-886f69ddcb6  | 9  | 37382736  | 37385020  | 10 | 2284 | 2  | 2  | 4  | NA | 1  | 1  |
| Lymph-BNHL      | 2439ec74-1713-4d47-a5d9-886f69ddcb6  | 11 | 29187581  | 29190989  | 6  | 3408 | NA | NA | NA | 2  | 1  | 3  |
| Lymph-BNHL      | 2439ec74-1713-4d47-a5d9-886f69ddcb6  | 14 | 106209481 | 106214196 | 14 | 4715 | 2  | 2  | 9  | NA | NA | 1  |
| Lymph-BNHL      | 2439ec74-1713-4d47-a5d9-886f69ddcb6  | 14 | 106238814 | 106242016 | 16 | 3202 | NA | 3  | 11 | NA | 2  | NA |
| Lymph-BNHL      | 2439ec74-1713-4d47-a5d9-886f69ddcb6  | 14 | 106323274 | 106329551 | 64 | 6277 | NA | 14 | 19 | 5  | 16 | 10 |
| Lymph-BNHL      | 2439ec74-1713-4d47-a5d9-886f69ddcb6  | 14 | 106830038 | 106833016 | 37 | 2978 | 2  | 4  | 8  | 5  | 11 | 7  |
| Lymph-BNHL      | 2439ec74-1713-4d47-a5d9-886f69ddcb6  | 16 | 77890152  | 77895625  | 7  | 5473 | NA | 1  | 2  | 2  | 1  | 1  |
| Lymph-BNHL      | 2439ec74-1713-4d47-a5d9-886f69ddcb6  | 19 | 38266221  | 38266575  | 6  | 354  | NA | NA | NA | NA | 3  | 3  |
| Lymph-BNHL      | 2439ec74-1713-4d47-a5d9-886f69ddcb6  | 22 | 22379511  | 22385479  | 39 | 5968 | 1  | 7  | 13 | 10 | 6  | 2  |
| Lymph-BNHL      | 2439ec74-1713-4d47-a5d9-886f69ddcb6  | 22 | 22758862  | 22764351  | 18 | 5489 | 2  | 4  | 7  | 3  | 2  | NA |
| Lymph-BNHL      | 2439ec74-1713-4d47-a5d9-886f69ddcb6  | X  | 12993511  | 12994814  | 16 | 1303 | 1  | 3  | 6  | 4  | NA | 2  |
| Liver-HCC       | 2468e58c-c623-11e3-bf01-24c6515278c0 | 3  | 188555540 | 188556847 | 9  | 1307 | 1  | 6  | 2  | NA | NA | NA |
| Lung-SCC        | 24badf07-8615-48a3-8d6e-45c3d783f18d | 3  | 163518112 | 163518602 | 7  | 490  | NA | 2  | 5  | NA | NA | NA |
| Lung-SCC        | 24badf07-8615-48a3-8d6e-45c3d783f18d | 3  | 172174490 | 172175951 | 7  | 1461 | NA | 3  | 4  | NA | NA | NA |
| Lung-SCC        | 24badf07-8615-48a3-8d6e-45c3d783f18d | 3  | 186932563 | 186936040 | 21 | 3477 | 2  | 4  | 15 | NA | NA | NA |
| Lung-SCC        | 24badf07-8615-48a3-8d6e-45c3d783f18d | X  | 24285929  | 24292169  | 15 | 6240 | 3  | 3  | 9  | NA | NA | NA |
| Kidney-RCC      | 252a1c43-f954-44d7-8e31-6bcd0157a05c | 5  | 96739488  | 96741269  | 12 | 1781 | 3  | 3  | 6  | NA | NA | NA |
| Panc-AdenoCA    | 2564a262-03e8-467b-9ea2-f3ab38d75ae1 | 6  | 51170042  | 51171143  | 8  | 1101 | 2  | 2  | 4  | NA | NA | NA |
| Panc-AdenoCA    | 2564a262-03e8-467b-9ea2-f3ab38d75ae1 | 14 | 21664031  | 21664283  | 7  | 252  | NA | 2  | 5  | NA | NA | NA |
| Panc-AdenoCA    | 2564a262-03e8-467b-9ea2-f3ab38d75ae1 | 14 | 28539328  | 28541946  | 23 | 2618 | 6  | 8  | 9  | NA | NA | NA |
| Panc-AdenoCA    | 2564a262-03e8-467b-9ea2-f3ab38d75ae1 | 14 | 54349030  | 54351229  | 14 | 2199 | 3  | 7  | 4  | NA | NA | NA |
| Panc-AdenoCA    | 2564a262-03e8-467b-9ea2-f3ab38d75ae1 | 14 | 79837471  | 79839253  | 14 | 1782 | 1  | 2  | 11 | NA | NA | NA |
| Panc-AdenoCA    | 2564a262-03e8-467b-9ea2-f3ab38d75ae1 | 14 | 93722951  | 93723374  | 7  | 423  | 2  | NA | 5  | NA | NA | NA |
| Biliary-AdenoCA | 2584b428-c623-11e3-bf01-24c6515278c0 | 8  | 135067371 | 135068678 | 11 | 1307 | NA | 7  | 4  | NA | NA | NA |
| Biliary-AdenoCA | 2584b428-c623-11e3-bf01-24c6515278c0 | 9  | 6761514   | 6762368   | 9  | 854  | NA | 1  | 8  | NA | NA | NA |
| Biliary-AdenoCA | 2584b428-c623-11e3-bf01-24c6515278c0 | 11 | 91626461  | 91626897  | 7  | 436  | NA | 6  | 1  | NA | NA | NA |
| Biliary-AdenoCA | 2584b428-c623-11e3-bf01-24c6515278c0 | X  | 44832175  | 44832380  | 6  | 205  | NA | NA | 6  | NA | NA | NA |
| Biliary-AdenoCA | 2584b428-c623-11e3-bf01-24c6515278c0 | X  | 49506146  | 49506714  | 7  | 568  | NA | 1  | 6  | NA | NA | NA |
| Panc-AdenoCA    | 25c32aca-6738-43ef-a103-243f2f9a3b43 | 2  | 32678394  | 32681685  | 9  | 3291 | 3  | 3  | 3  | NA | NA | NA |
| Panc-AdenoCA    | 25c32aca-6738-43ef-a103-243f2f9a3b43 | 2  | 122837360 | 122842266 | 14 | 4906 | 2  | 6  | 5  | NA | NA | 1  |
| Panc-AdenoCA    | 25c32aca-6738-43ef-a103-243f2f9a3b43 | 4  | 59193778  | 59198233  | 9  | 4455 | 2  | 3  | 4  | NA | NA | NA |
| Panc-AdenoCA    | 25c32aca-6738-43ef-a103-243f2f9a3b43 | 7  | 31888517  | 31893182  | 9  | 4665 | 3  | 2  | 4  | NA | NA | NA |
| Panc-AdenoCA    | 25c32aca-6738-43ef-a103-243f2f9a3b43 | 9  | 21883988  | 21884641  | 12 | 653  | 2  | 2  | 8  | NA | NA | NA |
| Panc-AdenoCA    | 25c32aca-6738-43ef-a103-243f2f9a3b43 | 10 | 131744355 | 131747800 | 25 | 3445 | NA | 9  | 16 | NA | NA | NA |
| Panc-AdenoCA    | 25c32aca-6738-43ef-a103-243f2f9a3b43 | 13 | 94503967  | 94504418  | 7  | 451  | 1  | 3  | 3  | NA | NA | NA |
| Panc-AdenoCA    | 25c32aca-6738-43ef-a103-243f2f9a3b43 | 14 | 48284100  | 48285059  | 6  | 959  | 2  | 3  | 1  | NA | NA | NA |
| Panc-AdenoCA    | 25c32aca-6738-43ef-a103-243f2f9a3b43 | 18 | 69588077  | 69592216  | 42 | 4139 | 1  | 13 | 28 | NA | NA | NA |
| Panc-AdenoCA    | 25c32aca-6738-43ef-a103-243f2f9a3b43 | X  | 81289180  | 81291520  | 8  | 2340 | NA | 7  | 1  | NA | NA | NA |
| Breast-AdenoCa  | 25c76a8f-77c0-4650-bddf-45ed0c10a2e6 | 8  | 109924152 | 109925280 | 13 | 1128 | 3  | 7  | 3  | NA | NA | NA |

|                |                                      |    |           |           |     |       |    |    |    |    |    |    |
|----------------|--------------------------------------|----|-----------|-----------|-----|-------|----|----|----|----|----|----|
| Eso-AdenoCa    | 25c99312-bf63-4654-a73a-03c3c1cd50b6 | 8  | 69467685  | 69470997  | 8   | 3312  | NA | NA | NA | 2  | 4  | 2  |
| Panc-AdenoCA   | 25cf7449-8c5b-403e-aa75-e2af158598e8 | 1  | 218141107 | 218142371 | 7   | 1264  | NA | 6  | 1  | NA | NA | NA |
| Panc-AdenoCA   | 25cf7449-8c5b-403e-aa75-e2af158598e8 | 3  | 16196439  | 16199328  | 14  | 2889  | 1  | 7  | 6  | NA | NA | NA |
| Panc-AdenoCA   | 25cf7449-8c5b-403e-aa75-e2af158598e8 | 3  | 49757131  | 49758015  | 9   | 884   | NA | 2  | 6  | NA | 1  | NA |
| Panc-AdenoCA   | 25cf7449-8c5b-403e-aa75-e2af158598e8 | 3  | 156305514 | 156308405 | 15  | 2891  | 1  | 7  | 7  | NA | NA | NA |
| Panc-AdenoCA   | 25cf7449-8c5b-403e-aa75-e2af158598e8 | 4  | 92475643  | 92476655  | 9   | 1012  | NA | NA | NA | 2  | 5  | 2  |
| Panc-AdenoCA   | 25cf7449-8c5b-403e-aa75-e2af158598e8 | 5  | 78451829  | 78455031  | 11  | 3202  | 2  | 5  | 4  | NA | NA | NA |
| Panc-AdenoCA   | 25cf7449-8c5b-403e-aa75-e2af158598e8 | 6  | 4918361   | 4920125   | 6   | 1764  | NA | 2  | 4  | NA | NA | NA |
| Panc-AdenoCA   | 25cf7449-8c5b-403e-aa75-e2af158598e8 | 8  | 17045249  | 17047116  | 7   | 1867  | 1  | 4  | 2  | NA | NA | NA |
| Panc-AdenoCA   | 25cf7449-8c5b-403e-aa75-e2af158598e8 | 8  | 27817855  | 27819594  | 7   | 1739  | 2  | 3  | 2  | NA | NA | NA |
| Panc-AdenoCA   | 25cf7449-8c5b-403e-aa75-e2af158598e8 | 8  | 80262081  | 80262664  | 10  | 583   | 2  | 5  | 3  | NA | NA | NA |
| Panc-AdenoCA   | 25cf7449-8c5b-403e-aa75-e2af158598e8 | 10 | 8042913   | 8043833   | 8   | 920   | NA | 6  | 2  | NA | NA | NA |
| Panc-AdenoCA   | 25cf7449-8c5b-403e-aa75-e2af158598e8 | 10 | 111152499 | 111157512 | 11  | 5013  | NA | 1  | 6  | NA | 4  | NA |
| Panc-AdenoCA   | 25cf7449-8c5b-403e-aa75-e2af158598e8 | 12 | 11478056  | 11479119  | 9   | 1063  | 1  | 5  | 3  | NA | NA | NA |
| Panc-AdenoCA   | 25cf7449-8c5b-403e-aa75-e2af158598e8 | 14 | 84291103  | 84291767  | 6   | 664   | 1  | 4  | 1  | NA | NA | NA |
| Panc-AdenoCA   | 25cf7449-8c5b-403e-aa75-e2af158598e8 | 14 | 97726463  | 97727381  | 12  | 918   | 4  | 5  | 3  | NA | NA | NA |
| Panc-AdenoCA   | 25cf7449-8c5b-403e-aa75-e2af158598e8 | 15 | 30229385  | 30233723  | 16  | 4338  | NA | 7  | 5  | NA | 3  | 1  |
| Ovary-AdenoCA  | 25f73b03-4ba8-47ba-ad80-6ccb82105c98 | 2  | 241343849 | 241349811 | 11  | 5962  | 2  | 4  | 5  | NA | NA | NA |
| Ovary-AdenoCA  | 25f73b03-4ba8-47ba-ad80-6ccb82105c98 | 6  | 125360714 | 125363350 | 10  | 2636  | 1  | 5  | 4  | NA | NA | NA |
| Ovary-AdenoCA  | 25f73b03-4ba8-47ba-ad80-6ccb82105c98 | 11 | 133595667 | 133598434 | 8   | 2767  | 1  | 5  | 2  | NA | NA | NA |
| Ovary-AdenoCA  | 25f73b03-4ba8-47ba-ad80-6ccb82105c98 | 19 | 34641842  | 34643221  | 14  | 1379  | 5  | 6  | 3  | NA | NA | NA |
| Ovary-AdenoCA  | 25f73b03-4ba8-47ba-ad80-6ccb82105c98 | X  | 43622450  | 43624038  | 6   | 1588  | 1  | 2  | 3  | NA | NA | NA |
| Ovary-AdenoCA  | 25f73b03-4ba8-47ba-ad80-6ccb82105c98 | X  | 55101908  | 55102706  | 7   | 798   | 1  | 1  | 1  | 4  | NA | NA |
| Lymph-CLL      | 278b2498-1d64-493b-ac43-3489ec86f313 | 14 | 106175702 | 106177016 | 14  | 1314  | 4  | 5  | 5  | NA | NA | NA |
| Lymph-CLL      | 278b2498-1d64-493b-ac43-3489ec86f313 | 14 | 106326603 | 106330579 | 7   | 3976  | NA | 1  | 6  | NA | NA | NA |
| Breast-AdenoCa | 27f87d1e-2c32-4beb-9677-62f7a286673d | 3  | 79846217  | 79848553  | 6   | 2336  | NA | 3  | 3  | NA | NA | NA |
| Breast-AdenoCa | 27f87d1e-2c32-4beb-9677-62f7a286673d | 8  | 65715944  | 65718923  | 7   | 2979  | 1  | 6  | NA | NA | NA | NA |
| Breast-AdenoCa | 27f87d1e-2c32-4beb-9677-62f7a286673d | 8  | 73081542  | 73087553  | 10  | 6011  | NA | 4  | 5  | NA | NA | 1  |
| Breast-AdenoCa | 27f87d1e-2c32-4beb-9677-62f7a286673d | 8  | 73377415  | 73378673  | 7   | 1258  | NA | 4  | 3  | NA | NA | NA |
| Breast-AdenoCa | 27f87d1e-2c32-4beb-9677-62f7a286673d | 9  | 127685757 | 127686257 | 7   | 500   | 2  | 2  | 3  | NA | NA | NA |
| Breast-AdenoCa | 27f87d1e-2c32-4beb-9677-62f7a286673d | 11 | 10985049  | 10985451  | 7   | 402   | NA | 2  | 5  | NA | NA | NA |
| Breast-AdenoCa | 27f87d1e-2c32-4beb-9677-62f7a286673d | 11 | 95217474  | 95224874  | 24  | 7400  | 5  | 10 | 8  | NA | NA | 1  |
| Breast-AdenoCa | 27f87d1e-2c32-4beb-9677-62f7a286673d | 12 | 63753942  | 63757018  | 8   | 3076  | 2  | 6  | NA | NA | NA | NA |
| Breast-AdenoCa | 27f87d1e-2c32-4beb-9677-62f7a286673d | 12 | 93112418  | 93116188  | 8   | 3770  | 2  | 3  | 3  | NA | NA | NA |
| Breast-AdenoCa | 27f87d1e-2c32-4beb-9677-62f7a286673d | 13 | 22848040  | 22849810  | 6   | 1770  | NA | 3  | 3  | NA | NA | NA |
| Breast-AdenoCa | 27f87d1e-2c32-4beb-9677-62f7a286673d | 13 | 40142575  | 40144458  | 12  | 1883  | NA | 6  | 6  | NA | NA | NA |
| Breast-AdenoCa | 27f87d1e-2c32-4beb-9677-62f7a286673d | 13 | 40237796  | 40241564  | 21  | 3768  | NA | 6  | 15 | NA | NA | NA |
| Breast-AdenoCa | 27f87d1e-2c32-4beb-9677-62f7a286673d | 13 | 98836975  | 98837825  | 11  | 850   | NA | 9  | 2  | NA | NA | NA |
| Breast-AdenoCa | 27f87d1e-2c32-4beb-9677-62f7a286673d | 18 | 66038822  | 66041811  | 10  | 2989  | NA | 8  | 2  | NA | NA | NA |
| Breast-AdenoCa | 27f87d1e-2c32-4beb-9677-62f7a286673d | 20 | 12088981  | 12089978  | 12  | 997   | 2  | 8  | 2  | NA | NA | NA |
| Breast-AdenoCa | 27f87d1e-2c32-4beb-9677-62f7a286673d | 20 | 59282128  | 59287289  | 10  | 5161  | NA | 10 | NA | NA | NA | NA |
| Lymph-BNHL     | 282b45ee-4af2-4c61-9acc-286eaf8d661a | 2  | 89157726  | 89248252  | 131 | 90526 | 5  | 17 | 33 | 43 | 17 | 16 |
| Lymph-BNHL     | 282b45ee-4af2-4c61-9acc-286eaf8d661a | 4  | 138027232 | 138031656 | 6   | 4424  | 1  | 1  | NA | 1  | 1  | 2  |
| Lymph-BNHL     | 282b45ee-4af2-4c61-9acc-286eaf8d661a | 5  | 158371280 | 158376849 | 7   | 5569  | 2  | NA | 1  | 1  | 1  | 2  |
| Lymph-BNHL     | 282b45ee-4af2-4c61-9acc-286eaf8d661a | 14 | 106211740 | 106241052 | 52  | 29312 | 8  | 11 | 31 | NA | NA | 2  |
| Lymph-BNHL     | 282b45ee-4af2-4c61-9acc-286eaf8d661a | 14 | 106323084 | 106330400 | 99  | 7316  | 10 | 32 | 36 | 10 | 6  | 5  |
| Lymph-BNHL     | 282b45ee-4af2-4c61-9acc-286eaf8d661a | 14 | 107113932 | 107115334 | 20  | 1402  | 2  | 3  | 6  | 3  | NA | 6  |
| Lymph-BNHL     | 282b45ee-4af2-4c61-9acc-286eaf8d661a | 16 | 19723096  | 19725495  | 8   | 2399  | 1  | 3  | 4  | NA | NA | NA |
| Lymph-BNHL     | 282b45ee-4af2-4c61-9acc-286eaf8d661a | 18 | 60983975  | 60988279  | 18  | 4304  | 1  | 3  | 10 | 2  | NA | 2  |
| Lymph-BNHL     | 282b45ee-4af2-4c61-9acc-286eaf8d661a | 22 | 23229994  | 23232383  | 13  | 2389  | NA | 2  | 3  | 3  | 2  | 3  |
| Eso-AdenoCa    | 28e81540-4744-4865-b627-c7c9d8a3c2b8 | 8  | 105226115 | 105228351 | 9   | 2236  | NA | NA | NA | 4  | 3  | 2  |
| Eso-AdenoCa    | 28e81540-4744-4865-b627-c7c9d8a3c2b8 | 10 | 50036066  | 50038101  | 8   | 2035  | 1  | 3  | 4  | NA | NA | NA |
| Panc-AdenoCA   | 28f41a20-b6d6-4ecc-888f-72f779ad9af7 | 1  | 110179072 | 110179215 | 6   | 143   | 2  | NA | 4  | NA | NA | NA |
| Panc-AdenoCA   | 28f41a20-b6d6-4ecc-888f-72f779ad9af7 | 1  | 111297628 | 111297854 | 12  | 226   | NA | NA | 12 | NA | NA | NA |
| Panc-AdenoCA   | 28f41a20-b6d6-4ecc-888f-72f779ad9af7 | 1  | 238070699 | 238072428 | 37  | 1729  | NA | NA | 37 | NA | NA | NA |
| Panc-AdenoCA   | 28f41a20-b6d6-4ecc-888f-72f779ad9af7 | 1  | 245589429 | 245593983 | 17  | 4554  | 1  | 4  | 10 | NA | NA | 2  |
| Liver-HCC      | 295aac88-c623-11e3-bf01-24c6515278c0 | 6  | 90907022  | 90907747  | 6   | 725   | NA | 3  | 3  | NA | NA | NA |
| Liver-HCC      | 295aac88-c623-11e3-bf01-24c6515278c0 | 7  | 85848792  | 85853366  | 7   | 4574  | 1  | 1  | NA | 1  | 3  | 1  |
| Liver-HCC      | 295aac88-c623-11e3-bf01-24c6515278c0 | 9  | 36443329  | 36449814  | 8   | 6485  | 2  | 4  | 2  | NA | NA | NA |
| Panc-AdenoCA   | 29a00d78-b9bb-4c6b-b142-d5b8bfa63455 | 8  | 5798960   | 5801395   | 8   | 2435  | 1  | NA | 7  | NA | NA | NA |

|                |                                      |    |           |           |    |       |    |    |    |    |    |    |
|----------------|--------------------------------------|----|-----------|-----------|----|-------|----|----|----|----|----|----|
| Panc-AdenoCA   | 29a00d78-b9bb-4c6b-b142-d5b8bfa63455 | 18 | 41660312  | 41663139  | 11 | 2827  | NA | 3  | 8  | NA | NA | NA |
| Liver-HCC      | 29b92b51-7ba3-42a9-97d3-6a9b5e43f928 | 2  | 234611744 | 234612283 | 6  | 539   | NA | NA | NA | 2  | 3  | 1  |
| Ovary-AdenoCA  | 2a8d63eb-0174-4213-9214-413f391f512c | 3  | 50094940  | 50098524  | 9  | 3584  | 2  | 4  | 3  | NA | NA | NA |
| Ovary-AdenoCA  | 2a8d63eb-0174-4213-9214-413f391f512c | 7  | 14576375  | 14577199  | 6  | 824   | 2  | 3  | 1  | NA | NA | NA |
| Ovary-AdenoCA  | 2a8d63eb-0174-4213-9214-413f391f512c | 19 | 9852603   | 9853408   | 8  | 805   | 2  | 3  | 3  | NA | NA | NA |
| Ovary-AdenoCA  | 2a8d63eb-0174-4213-9214-413f391f512c | 19 | 43815212  | 43818390  | 12 | 3178  | 6  | 6  | NA | NA | NA | NA |
| Ovary-AdenoCA  | 2a8d63eb-0174-4213-9214-413f391f512c | 19 | 46460948  | 46466226  | 10 | 5278  | 2  | 8  | NA | NA | NA | NA |
| CNS-Oligo      | 2aeaab9f-4459-4be8-91e7-e0746cbd671c | 2  | 214712864 | 214720999 | 25 | 8135  | NA | 7  | 18 | NA | NA | NA |
| CNS-Oligo      | 2aeaab9f-4459-4be8-91e7-e0746cbd671c | 2  | 215474326 | 215478978 | 7  | 4652  | 1  | 4  | 2  | NA | NA | NA |
| Breast-AdenoCa | 2b000af3-2c9d-4eaa-af3f-8101b7425c37 | 8  | 36015029  | 36025025  | 27 | 9996  | 3  | 18 | 6  | NA | NA | NA |
| Breast-AdenoCa | 2b000af3-2c9d-4eaa-af3f-8101b7425c37 | 8  | 70807634  | 70813491  | 9  | 5857  | 2  | 3  | 4  | NA | NA | NA |
| Breast-AdenoCa | 2b000af3-2c9d-4eaa-af3f-8101b7425c37 | 11 | 59966239  | 59967570  | 9  | 1331  | NA | 5  | 3  | NA | 1  | NA |
| Breast-AdenoCa | 2b000af3-2c9d-4eaa-af3f-8101b7425c37 | 20 | 31143248  | 31143262  | 6  | 14    | NA | 1  | NA | 4  | 1  | NA |
| Lymph-BNHL     | 2b02e3ad-4423-491e-993a-561e80dc7bcf | 8  | 128748694 | 128750683 | 6  | 1989  | 1  | NA | 5  | NA | NA | NA |
| Lymph-BNHL     | 2b02e3ad-4423-491e-993a-561e80dc7bcf | 14 | 106323597 | 106330408 | 37 | 6811  | 3  | 10 | 12 | 9  | 2  | 1  |
| Lymph-BNHL     | 2b02e3ad-4423-491e-993a-561e80dc7bcf | 14 | 106382966 | 106385055 | 13 | 2089  | NA | 3  | 6  | 3  | 1  | NA |
| Lymph-BNHL     | 2b02e3ad-4423-491e-993a-561e80dc7bcf | 14 | 106725289 | 106725524 | 10 | 235   | NA | 5  | 5  | NA | NA | NA |
| Lymph-BNHL     | 2b02e3ad-4423-491e-993a-561e80dc7bcf | 22 | 22758762  | 22764599  | 24 | 5837  | 3  | 8  | 10 | NA | 2  | 1  |
| Lymph-BNHL     | 2b02e3ad-4423-491e-993a-561e80dc7bcf | 22 | 23247368  | 23247673  | 9  | 305   | NA | 5  | 1  | 2  | NA | 1  |
| Bladder-TCC    | 2b142863-b963-4cc9-8f8f-c72503c93390 | 1  | 27322609  | 27328146  | 7  | 5537  | 1  | 1  | 5  | NA | NA | NA |
| Bladder-TCC    | 2b142863-b963-4cc9-8f8f-c72503c93390 | 1  | 32392300  | 32394483  | 7  | 2183  | 1  | 1  | 5  | NA | NA | NA |
| Bladder-TCC    | 2b142863-b963-4cc9-8f8f-c72503c93390 | 1  | 110086286 | 110095010 | 13 | 8724  | 3  | 4  | 5  | NA | NA | 1  |
| Bladder-TCC    | 2b142863-b963-4cc9-8f8f-c72503c93390 | 2  | 10115572  | 10119675  | 6  | 4103  | NA | 2  | 4  | NA | NA | NA |
| Bladder-TCC    | 2b142863-b963-4cc9-8f8f-c72503c93390 | 2  | 32285871  | 32294460  | 12 | 8589  | 1  | 6  | 5  | NA | NA | NA |
| Bladder-TCC    | 2b142863-b963-4cc9-8f8f-c72503c93390 | 2  | 64987329  | 64993006  | 8  | 5677  | NA | 2  | 6  | NA | NA | NA |
| Bladder-TCC    | 2b142863-b963-4cc9-8f8f-c72503c93390 | 2  | 85849471  | 85855376  | 9  | 5905  | NA | 2  | 7  | NA | NA | NA |
| Bladder-TCC    | 2b142863-b963-4cc9-8f8f-c72503c93390 | 3  | 124192245 | 124195377 | 8  | 3132  | 1  | 2  | 5  | NA | NA | NA |
| Bladder-TCC    | 2b142863-b963-4cc9-8f8f-c72503c93390 | 3  | 188554261 | 188556245 | 8  | 1984  | NA | 4  | 4  | NA | NA | NA |
| Bladder-TCC    | 2b142863-b963-4cc9-8f8f-c72503c93390 | 4  | 83973290  | 83974674  | 10 | 1384  | 2  | 6  | 2  | NA | NA | NA |
| Bladder-TCC    | 2b142863-b963-4cc9-8f8f-c72503c93390 | 5  | 31475733  | 31477026  | 6  | 1293  | NA | 2  | 4  | NA | NA | NA |
| Bladder-TCC    | 2b142863-b963-4cc9-8f8f-c72503c93390 | 5  | 124274288 | 124277879 | 7  | 3591  | 1  | 2  | 4  | NA | NA | NA |
| Bladder-TCC    | 2b142863-b963-4cc9-8f8f-c72503c93390 | 6  | 31766264  | 31770193  | 9  | 3929  | 1  | 4  | 4  | NA | NA | NA |
| Bladder-TCC    | 2b142863-b963-4cc9-8f8f-c72503c93390 | 6  | 53628410  | 53631223  | 8  | 2813  | 2  | 4  | 2  | NA | NA | NA |
| Bladder-TCC    | 2b142863-b963-4cc9-8f8f-c72503c93390 | 6  | 71412170  | 71413034  | 7  | 864   | 2  | 1  | 4  | NA | NA | NA |
| Bladder-TCC    | 2b142863-b963-4cc9-8f8f-c72503c93390 | 6  | 136502541 | 136507194 | 11 | 4653  | 2  | NA | 9  | NA | NA | NA |
| Bladder-TCC    | 2b142863-b963-4cc9-8f8f-c72503c93390 | 6  | 136692875 | 136699716 | 18 | 6841  | 2  | 5  | 11 | NA | NA | NA |
| Bladder-TCC    | 2b142863-b963-4cc9-8f8f-c72503c93390 | 6  | 142736750 | 142741269 | 12 | 4519  | 2  | 3  | 7  | NA | NA | NA |
| Bladder-TCC    | 2b142863-b963-4cc9-8f8f-c72503c93390 | 6  | 148063046 | 148064292 | 11 | 1246  | 2  | 4  | 5  | NA | NA | NA |
| Bladder-TCC    | 2b142863-b963-4cc9-8f8f-c72503c93390 | 7  | 17463858  | 17465976  | 6  | 2118  | NA | 1  | 5  | NA | NA | NA |
| Bladder-TCC    | 2b142863-b963-4cc9-8f8f-c72503c93390 | 7  | 73522174  | 73523217  | 7  | 1043  | 1  | 2  | 4  | NA | NA | NA |
| Bladder-TCC    | 2b142863-b963-4cc9-8f8f-c72503c93390 | 8  | 126061025 | 126065932 | 6  | 4907  | 1  | 3  | 2  | NA | NA | NA |
| Bladder-TCC    | 2b142863-b963-4cc9-8f8f-c72503c93390 | 8  | 134893082 | 134895999 | 9  | 2917  | NA | 5  | 4  | NA | NA | NA |
| Bladder-TCC    | 2b142863-b963-4cc9-8f8f-c72503c93390 | 10 | 741556    | 747842    | 23 | 6286  | 1  | 5  | 16 | 1  | NA | NA |
| Bladder-TCC    | 2b142863-b963-4cc9-8f8f-c72503c93390 | 10 | 5996273   | 5998051   | 7  | 1778  | NA | NA | 7  | NA | NA | NA |
| Bladder-TCC    | 2b142863-b963-4cc9-8f8f-c72503c93390 | 10 | 45558102  | 45562236  | 21 | 4134  | 2  | 4  | 15 | NA | NA | NA |
| Bladder-TCC    | 2b142863-b963-4cc9-8f8f-c72503c93390 | 10 | 75173712  | 75177791  | 10 | 4079  | 1  | 1  | 8  | NA | NA | NA |
| Bladder-TCC    | 2b142863-b963-4cc9-8f8f-c72503c93390 | 10 | 95807722  | 95811961  | 7  | 4239  | 2  | 4  | 1  | NA | NA | NA |
| Bladder-TCC    | 2b142863-b963-4cc9-8f8f-c72503c93390 | 11 | 64585741  | 64589767  | 6  | 4026  | NA | 5  | 1  | NA | NA | NA |
| Bladder-TCC    | 2b142863-b963-4cc9-8f8f-c72503c93390 | 11 | 96997809  | 97001339  | 21 | 3530  | 3  | 4  | 13 | NA | NA | 1  |
| Bladder-TCC    | 2b142863-b963-4cc9-8f8f-c72503c93390 | 12 | 2487783   | 2488494   | 8  | 711   | NA | 1  | 6  | 1  | NA | NA |
| Bladder-TCC    | 2b142863-b963-4cc9-8f8f-c72503c93390 | 12 | 57126723  | 57132920  | 12 | 6197  | 2  | 6  | 4  | NA | NA | NA |
| Bladder-TCC    | 2b142863-b963-4cc9-8f8f-c72503c93390 | 12 | 125385362 | 125387577 | 8  | 2215  | NA | 5  | 3  | NA | NA | NA |
| Bladder-TCC    | 2b142863-b963-4cc9-8f8f-c72503c93390 | 14 | 68653980  | 68658894  | 6  | 4914  | 3  | 1  | 2  | NA | NA | NA |
| Bladder-TCC    | 2b142863-b963-4cc9-8f8f-c72503c93390 | 15 | 101040394 | 101045997 | 9  | 5603  | NA | 2  | 7  | NA | NA | NA |
| Bladder-TCC    | 2b142863-b963-4cc9-8f8f-c72503c93390 | 16 | 1688807   | 1692335   | 7  | 3528  | 1  | 6  | NA | NA | NA | NA |
| Bladder-TCC    | 2b142863-b963-4cc9-8f8f-c72503c93390 | 16 | 16231040  | 16251108  | 24 | 20068 | 4  | 11 | 8  | NA | 1  | NA |
| Bladder-TCC    | 2b142863-b963-4cc9-8f8f-c72503c93390 | 16 | 23493148  | 23497135  | 13 | 3987  | 2  | 3  | 8  | NA | NA | NA |
| Bladder-TCC    | 2b142863-b963-4cc9-8f8f-c72503c93390 | 16 | 89402532  | 89407347  | 12 | 4815  | NA | 4  | 8  | NA | NA | NA |
| Bladder-TCC    | 2b142863-b963-4cc9-8f8f-c72503c93390 | 17 | 4413297   | 4414633   | 8  | 1336  | NA | 2  | 6  | NA | NA | NA |
| Bladder-TCC    | 2b142863-b963-4cc9-8f8f-c72503c93390 | 17 | 27070045  | 27082639  | 16 | 12594 | 1  | 7  | 8  | NA | NA | NA |

|                |                                      |    |           |           |    |       |    |    |    |    |    |    |
|----------------|--------------------------------------|----|-----------|-----------|----|-------|----|----|----|----|----|----|
| Bladder-TCC    | 2b142863-b963-4cc9-8f8f-c72503c93390 | 17 | 30578079  | 30579235  | 9  | 1156  | 1  | 4  | 4  | NA | NA | NA |
| Bladder-TCC    | 2b142863-b963-4cc9-8f8f-c72503c93390 | 19 | 11100361  | 11101644  | 9  | 1283  | 1  | 2  | 6  | NA | NA | NA |
| Bladder-TCC    | 2b142863-b963-4cc9-8f8f-c72503c93390 | 20 | 5937805   | 5945216   | 21 | 7411  | NA | 8  | 13 | NA | NA | NA |
| Bladder-TCC    | 2b142863-b963-4cc9-8f8f-c72503c93390 | 20 | 60765146  | 60768912  | 12 | 3766  | NA | 4  | 8  | NA | NA | NA |
| Bladder-TCC    | 2b142863-b963-4cc9-8f8f-c72503c93390 | 21 | 36193368  | 36198023  | 6  | 4655  | NA | 2  | 4  | NA | NA | NA |
| Bladder-TCC    | 2b142863-b963-4cc9-8f8f-c72503c93390 | 22 | 30367748  | 30368524  | 7  | 776   | NA | 2  | 5  | NA | NA | NA |
| Bladder-TCC    | 2b142863-b963-4cc9-8f8f-c72503c93390 | 22 | 31511884  | 31514970  | 7  | 3086  | 1  | 4  | 2  | NA | NA | NA |
| Bladder-TCC    | 2b142863-b963-4cc9-8f8f-c72503c93390 | 22 | 36249129  | 36251469  | 13 | 2340  | 2  | 4  | 7  | NA | NA | NA |
| Bladder-TCC    | 2b142863-b963-4cc9-8f8f-c72503c93390 | 22 | 46408116  | 46409156  | 7  | 1040  | NA | 5  | 2  | NA | NA | NA |
| Lymph-BNHL     | 2b36ac4b-eed3-4591-8b4f-b44049dfc5ed | 14 | 106325088 | 106331445 | 30 | 6357  | 2  | 7  | 19 | 1  | NA | 1  |
| Panc-AdenoCA   | 2b3837b3-ee29-4a08-848e-1206404da986 | 16 | 34775287  | 34775324  | 7  | 37    | 1  | NA | 2  | 4  | NA | NA |
| Panc-AdenoCA   | 2b3837b3-ee29-4a08-848e-1206404da986 | 22 | 36407210  | 36408198  | 11 | 988   | 4  | 1  | 6  | NA | NA | NA |
| Eso-AdenoCa    | 2b41746a-95c0-4875-afb5-c6d3d3ad30d9 | 4  | 179005976 | 179008817 | 10 | 2841  | NA | NA | NA | 4  | 5  | 1  |
| Eso-AdenoCa    | 2b41746a-95c0-4875-afb5-c6d3d3ad30d9 | 5  | 20484077  | 20490917  | 8  | 6840  | 1  | NA | NA | 2  | 3  | 2  |
| Eso-AdenoCa    | 2b41746a-95c0-4875-afb5-c6d3d3ad30d9 | 5  | 20493458  | 20497760  | 13 | 4302  | 1  | NA | 3  | 2  | 4  | 3  |
| Eso-AdenoCa    | 2b41746a-95c0-4875-afb5-c6d3d3ad30d9 | 7  | 87181382  | 87182540  | 7  | 1158  | NA | 1  | 3  | 1  | NA | 2  |
| Eso-AdenoCa    | 2b41746a-95c0-4875-afb5-c6d3d3ad30d9 | 17 | 49718772  | 49721356  | 9  | 2584  | 2  | 5  | 2  | NA | NA | NA |
| Eso-AdenoCa    | 2b41746a-95c0-4875-afb5-c6d3d3ad30d9 | 17 | 52056564  | 52056732  | 7  | 168   | NA | NA | 7  | NA | NA | NA |
| Eso-AdenoCa    | 2b41746a-95c0-4875-afb5-c6d3d3ad30d9 | X  | 12896277  | 12898286  | 15 | 2009  | 2  | 10 | 2  | NA | 1  | NA |
| Ovary-AdenoCA  | 2b4feb84-89e4-4c38-8561-5ffab02c8132 | 2  | 206074018 | 206075047 | 6  | 1029  | NA | 4  | 2  | NA | NA | NA |
| Panc-AdenoCA   | 2b6d4d66-7f0b-4bc0-b3d6-171956a937c5 | 2  | 12463810  | 12466024  | 23 | 2214  | 2  | 12 | 9  | NA | NA | NA |
| Panc-AdenoCA   | 2b6d4d66-7f0b-4bc0-b3d6-171956a937c5 | 3  | 185845997 | 185846441 | 7  | 444   | 3  | NA | 4  | NA | NA | NA |
| Panc-AdenoCA   | 2b6d4d66-7f0b-4bc0-b3d6-171956a937c5 | 4  | 143063285 | 143065032 | 7  | 1747  | NA | 2  | 5  | NA | NA | NA |
| Panc-AdenoCA   | 2b6d4d66-7f0b-4bc0-b3d6-171956a937c5 | 6  | 116370854 | 116372941 | 7  | 2087  | NA | 2  | 2  | 1  | 2  | NA |
| Panc-AdenoCA   | 2b6d4d66-7f0b-4bc0-b3d6-171956a937c5 | 7  | 107292299 | 107295243 | 11 | 2944  | 1  | 5  | 5  | NA | NA | NA |
| Panc-AdenoCA   | 2b6d4d66-7f0b-4bc0-b3d6-171956a937c5 | 12 | 93817684  | 93819637  | 28 | 1953  | 3  | 8  | 16 | NA | 1  | NA |
| Panc-AdenoCA   | 2b6d4d66-7f0b-4bc0-b3d6-171956a937c5 | 12 | 103984122 | 103985443 | 9  | 1321  | NA | NA | 9  | NA | NA | NA |
| Panc-AdenoCA   | 2b6d4d66-7f0b-4bc0-b3d6-171956a937c5 | 12 | 103998475 | 103999282 | 19 | 807   | 2  | 2  | 14 | NA | 1  | NA |
| Panc-AdenoCA   | 2b6d4d66-7f0b-4bc0-b3d6-171956a937c5 | 12 | 117253417 | 117255698 | 8  | 2281  | 1  | 5  | 2  | NA | NA | NA |
| Panc-AdenoCA   | 2b6d4d66-7f0b-4bc0-b3d6-171956a937c5 | X  | 94052100  | 94053650  | 10 | 1550  | NA | 4  | 6  | NA | NA | NA |
| Panc-AdenoCA   | 2b6d4d66-7f0b-4bc0-b3d6-171956a937c5 | X  | 99369515  | 99371792  | 10 | 2277  | 1  | 6  | 3  | NA | NA | NA |
| Panc-AdenoCA   | 2b6d4d66-7f0b-4bc0-b3d6-171956a937c5 | X  | 144654380 | 144656359 | 9  | 1979  | NA | 3  | 6  | NA | NA | NA |
| Panc-AdenoCA   | 2b6d4d66-7f0b-4bc0-b3d6-171956a937c5 | X  | 154835324 | 154835897 | 14 | 573   | 1  | 7  | 6  | NA | NA | NA |
| Uterus-AdenoCA | 2b78de4e-4c8b-4adf-a058-3dae797e7881 | 8  | 95839149  | 95839327  | 6  | 178   | NA | NA | 3  | 3  | NA | NA |
| Panc-AdenoCA   | 2bd9ccca-3fae-4b66-a762-6f30d6276222 | 12 | 29582053  | 29582780  | 7  | 727   | 1  | 1  | 5  | NA | NA | NA |
| Panc-AdenoCA   | 2bd9ccca-3fae-4b66-a762-6f30d6276222 | 20 | 51183576  | 51183945  | 12 | 369   | 3  | 3  | 6  | NA | NA | NA |
| Panc-AdenoCA   | 2bd9ccca-3fae-4b66-a762-6f30d6276222 | 22 | 46452330  | 46454358  | 26 | 2028  | 4  | 9  | 13 | NA | NA | NA |
| Panc-AdenoCA   | 2bf5b018-9f19-4fbd-9e1f-7d958aabe5d1 | 1  | 153304466 | 153308111 | 6  | 3645  | 2  | 1  | 2  | NA | NA | 1  |
| Panc-AdenoCA   | 2bf5b018-9f19-4fbd-9e1f-7d958aabe5d1 | 2  | 12230916  | 12232134  | 10 | 1218  | 2  | 7  | 1  | NA | NA | NA |
| Panc-AdenoCA   | 2bf5b018-9f19-4fbd-9e1f-7d958aabe5d1 | 3  | 78089541  | 78090158  | 8  | 617   | 1  | 6  | 1  | NA | NA | NA |
| Panc-AdenoCA   | 2bf5b018-9f19-4fbd-9e1f-7d958aabe5d1 | 4  | 190841640 | 190843560 | 12 | 1920  | 2  | 7  | 3  | NA | NA | NA |
| Panc-AdenoCA   | 2bf5b018-9f19-4fbd-9e1f-7d958aabe5d1 | 6  | 37543463  | 37547770  | 8  | 4307  | 1  | 4  | 3  | NA | NA | NA |
| Panc-AdenoCA   | 2bf5b018-9f19-4fbd-9e1f-7d958aabe5d1 | 7  | 157245955 | 157247516 | 11 | 1561  | 1  | 7  | 3  | NA | NA | NA |
| Panc-AdenoCA   | 2bf5b018-9f19-4fbd-9e1f-7d958aabe5d1 | 9  | 36669493  | 36672664  | 12 | 3171  | 4  | 3  | 5  | NA | NA | NA |
| Panc-AdenoCA   | 2bf5b018-9f19-4fbd-9e1f-7d958aabe5d1 | 14 | 56480216  | 56483267  | 7  | 3051  | 2  | 2  | 2  | NA | 1  | NA |
| Panc-AdenoCA   | 2bf5b018-9f19-4fbd-9e1f-7d958aabe5d1 | 16 | 67871956  | 67873971  | 11 | 2015  | 2  | 3  | 6  | NA | NA | NA |
| Panc-AdenoCA   | 2bf5b018-9f19-4fbd-9e1f-7d958aabe5d1 | 18 | 9809489   | 9810239   | 9  | 750   | 3  | 5  | 1  | NA | NA | NA |
| Panc-AdenoCA   | 2bf5b018-9f19-4fbd-9e1f-7d958aabe5d1 | 18 | 65448452  | 65448868  | 8  | 416   | 2  | 6  | NA | NA | NA | NA |
| Panc-AdenoCA   | 2bf5b018-9f19-4fbd-9e1f-7d958aabe5d1 | 18 | 72338798  | 72339353  | 8  | 555   | 3  | 2  | 3  | NA | NA | NA |
| Panc-AdenoCA   | 2bf5b018-9f19-4fbd-9e1f-7d958aabe5d1 | 19 | 29275391  | 29280161  | 6  | 4770  | NA | 1  | 5  | NA | NA | NA |
| Liver-HCC      | 2bff30d5-be79-4686-8164-7a7d9619d3c0 | 1  | 157372985 | 157374999 | 19 | 2014  | 1  | 9  | 9  | NA | NA | NA |
| Liver-HCC      | 2bff30d5-be79-4686-8164-7a7d9619d3c0 | 1  | 171430447 | 171434100 | 13 | 3653  | 1  | 3  | 9  | NA | NA | NA |
| Liver-HCC      | 2bff30d5-be79-4686-8164-7a7d9619d3c0 | 4  | 63327208  | 63338034  | 20 | 10826 | 2  | 7  | 7  | 2  | NA | 2  |
| Liver-HCC      | 2bff30d5-be79-4686-8164-7a7d9619d3c0 | 8  | 65151301  | 65152514  | 8  | 1213  | 2  | 5  | 1  | NA | NA | NA |
| Liver-HCC      | 2bff30d5-be79-4686-8164-7a7d9619d3c0 | 8  | 65272388  | 65289227  | 22 | 16839 | 1  | 3  | 18 | NA | NA | NA |
| Lymph-BNHL     | 2c3ada8b-9650-4859-9857-43209c0ffcea | 2  | 89158119  | 89159095  | 16 | 976   | NA | 3  | 1  | 6  | 4  | 2  |
| Lymph-BNHL     | 2c3ada8b-9650-4859-9857-43209c0ffcea | 3  | 63068265  | 63069161  | 6  | 896   | NA | 1  | 1  | 3  | NA | 1  |
| Lymph-BNHL     | 2c3ada8b-9650-4859-9857-43209c0ffcea | 4  | 117718755 | 117725654 | 8  | 6899  | NA | 1  | 1  | 4  | 1  | 1  |
| Lymph-BNHL     | 2c3ada8b-9650-4859-9857-43209c0ffcea | 5  | 24134632  | 24137859  | 7  | 3227  | NA | NA | NA | 1  | 3  | 3  |
| Lymph-BNHL     | 2c3ada8b-9650-4859-9857-43209c0ffcea | 8  | 84398827  | 84401493  | 6  | 2666  | NA | 1  | NA | 2  | 2  | 1  |



|                  |                                       |    |           |           |    |       |    |    |    |    |    |    |
|------------------|---------------------------------------|----|-----------|-----------|----|-------|----|----|----|----|----|----|
| Lymph-BNHL       | 2c3ada8b-9650-4859-9857-43209c0f7cea  | 9  | 14117826  | 14122587  | 6  | 4761  | NA | NA | 2  | 1  | 1  | 2  |
| Lymph-BNHL       | 2c3ada8b-9650-4859-9857-43209c0f7cea  | 9  | 14132560  | 14140601  | 10 | 8041  | NA | NA | 1  | 6  | 1  | 2  |
| Lymph-BNHL       | 2c3ada8b-9650-4859-9857-43209c0f7cea  | 10 | 58342465  | 58347303  | 7  | 4838  | 1  | 1  | 1  | 3  | NA | 1  |
| Lymph-BNHL       | 2c3ada8b-9650-4859-9857-43209c0f7cea  | 11 | 81974014  | 81976682  | 6  | 2668  | NA | NA | NA | 1  | 2  | 3  |
| Lymph-BNHL       | 2c3ada8b-9650-4859-9857-43209c0f7cea  | 13 | 96769498  | 96775213  | 12 | 5715  | NA | 1  | NA | 2  | 6  | 3  |
| Lymph-BNHL       | 2c3ada8b-9650-4859-9857-43209c0f7cea  | 14 | 106112679 | 106114354 | 11 | 1675  | NA | 1  | 10 | NA | NA | NA |
| Lymph-BNHL       | 2c3ada8b-9650-4859-9857-43209c0f7cea  | 14 | 106323782 | 106330157 | 82 | 6375  | 4  | 14 | 39 | 12 | 11 | 2  |
| Lymph-BNHL       | 2c3ada8b-9650-4859-9857-43209c0f7cea  | 14 | 106725618 | 106726127 | 14 | 509   | 1  | 2  | 2  | 4  | 3  | 2  |
| Lymph-BNHL       | 2c3ada8b-9650-4859-9857-43209c0f7cea  | 18 | 60984719  | 60988235  | 26 | 3516  | 1  | 5  | 5  | 8  | 2  | 5  |
| Lymph-BNHL       | 2c3ada8b-9650-4859-9857-43209c0f7cea  | 22 | 22730736  | 22735610  | 8  | 4874  | 1  | 2  | 3  | NA | 2  | NA |
| Lymph-BNHL       | 2c3ada8b-9650-4859-9857-43209c0f7cea  | 22 | 23230360  | 23253828  | 48 | 23468 | 2  | 7  | 19 | 9  | 6  | 5  |
| Lymph-BNHL       | 2c3ada8b-9650-4859-9857-43209c0f7cea  | X  | 99901397  | 99905494  | 7  | 4097  | 1  | NA | NA | 3  | 2  | 1  |
| Lymph-BNHL       | 2c3ada8b-9650-4859-9857-43209c0f7cea  | X  | 99934734  | 99940174  | 8  | 5440  | NA | 2  | 2  | 1  | NA | 3  |
| Kidney-RCC       | 2c581a74-7716-4c20-b366-a8e1d9a901f6  | 1  | 241091269 | 241091848 | 8  | 579   | 2  | 3  | 3  | NA | NA | NA |
| Kidney-RCC       | 2c581a74-7716-4c20-b366-a8e1d9a901f6  | 2  | 31056351  | 31057274  | 10 | 923   | 1  | 6  | 3  | NA | NA | NA |
| Breast-AdenoCa   | 2c6f1862-bb82-4e7e-9cb3-338bdf022f4   | 17 | 11545423  | 11546728  | 7  | 1305  | 1  | 4  | 2  | NA | NA | NA |
| Breast-AdenoCa   | 2c6f1862-bb82-4e7e-9cb3-338bdf022f4   | 17 | 31863857  | 31865701  | 8  | 1844  | NA | 6  | 2  | NA | NA | NA |
| Breast-AdenoCa   | 2c6f1862-bb82-4e7e-9cb3-338bdf022f4   | 17 | 32389482  | 32390226  | 7  | 744   | NA | NA | NA | 2  | 5  | NA |
| Breast-AdenoCa   | 2c6f1862-bb82-4e7e-9cb3-338bdf022f4   | 17 | 38245808  | 38249986  | 7  | 4178  | NA | 4  | 3  | NA | NA | NA |
| Prost-AdenoCA    | 2c9c50ff-01d9-4703-931b-04119178706f  | 3  | 124208799 | 124211611 | 17 | 2812  | 1  | 3  | 13 | NA | NA | NA |
| Ovary-AdenoCA    | 2c9dc04b-e9ec-4cf1-ab2c-a18edb30dd37  | 7  | 396929    | 399991    | 6  | 3062  | 6  | NA | NA | NA | NA | NA |
| ColoRect-AdenoCA | 2cdc4cce-0877-4ec1-85f5-20c909912e65  | 8  | 40694527  | 40696992  | 7  | 2465  | NA | 4  | 3  | NA | NA | NA |
| Liver-HCC        | 2d0e4b82-c623-11e3-bf01-24c6515278c0  | 17 | 5334415   | 5335822   | 10 | 1407  | NA | NA | 10 | NA | NA | NA |
| Kidney-RCC       | 2deb8f9a-9e0a-46d1-bcb5-902db3b5c8ac  | 1  | 247996506 | 247997054 | 8  | 548   | NA | NA | 8  | NA | NA | NA |
| Panc-AdenoCA     | 2e43e0ca-54ea-482e-acf2-0048d9187a5c  | 2  | 232587155 | 232588211 | 16 | 1056  | 2  | 7  | 7  | NA | NA | NA |
| Panc-AdenoCA     | 2e43e0ca-54ea-482e-acf2-0048d9187a5c  | 4  | 121067568 | 121068383 | 11 | 815   | 3  | 2  | 6  | NA | NA | NA |
| Panc-AdenoCA     | 2e43e0ca-54ea-482e-acf2-0048d9187a5c  | 6  | 6329873   | 6330591   | 6  | 718   | NA | NA | 6  | NA | NA | NA |
| Panc-AdenoCA     | 2e43e0ca-54ea-482e-acf2-0048d9187a5c  | 6  | 116855522 | 116865873 | 42 | 10351 | 9  | 17 | 16 | NA | NA | NA |
| Panc-AdenoCA     | 2e43e0ca-54ea-482e-acf2-0048d9187a5c  | 16 | 80507712  | 80509084  | 18 | 1372  | 2  | 9  | 7  | NA | NA | NA |
| Prost-AdenoCA    | 2ea2294d-fab9-43ae-a222-370487495b06  | 6  | 85348251  | 85348468  | 6  | 217   | NA | NA | NA | NA | 6  | NA |
| Prost-AdenoCA    | 2ea2294d-fab9-43ae-a222-370487495b06  | 8  | 42924592  | 42934309  | 16 | 9717  | NA | 6  | 10 | NA | NA | NA |
| Liver-HCC        | 2f149d78-c623-11e3-bf01-24c6515278c0  | 11 | 74908246  | 74914412  | 9  | 6166  | 3  | 3  | 3  | NA | NA | NA |
| Ovary-AdenoCA    | 2f2eaecc-6509-423f-b63a-8c3bea1ba4a4  | 12 | 133763526 | 133765003 | 6  | 1477  | 2  | 3  | 1  | NA | NA | NA |
| Ovary-AdenoCA    | 2f2eaecc-6509-423f-b63a-8c3bea1ba4a4  | 14 | 106657473 | 106661663 | 7  | 4190  | NA | 2  | 4  | 1  | NA | NA |
| Ovary-AdenoCA    | 2f2eaecc-6509-423f-b63a-8c3bea1ba4a4  | 14 | 106963866 | 106964257 | 10 | 391   | NA | 3  | 7  | NA | NA | NA |
| Prost-AdenoCA    | 2f79fe89-9d24-4fbe-ba5b-0ff6c3c4d663  | 3  | 180297527 | 180301515 | 13 | 3988  | NA | 5  | 8  | NA | NA | NA |
| Prost-AdenoCA    | 2f79fe89-9d24-4fbe-ba5b-0ff6c3c4d663  | 7  | 79649091  | 79649913  | 8  | 822   | NA | NA | 8  | NA | NA | NA |
| Prost-AdenoCA    | 2f79fe89-9d24-4fbe-ba5b-0ff6c3c4d663  | 12 | 88071951  | 88074841  | 6  | 2890  | 1  | 3  | 2  | NA | NA | NA |
| Prost-AdenoCA    | 2f79fe89-9d24-4fbe-ba5b-0ff6c3c4d663  | 13 | 103365102 | 103366196 | 7  | 1094  | NA | 4  | 3  | NA | NA | NA |
| Prost-AdenoCA    | 2f79fe89-9d24-4fbe-ba5b-0ff6c3c4d663  | 19 | 57077929  | 57078575  | 8  | 646   | 1  | 1  | 6  | NA | NA | NA |
| Panc-AdenoCA     | 2fdffb06c-0d2f-4e1d-9756-bcb08a7f90af | 2  | 49168500  | 49169530  | 6  | 1030  | 1  | 2  | 3  | NA | NA | NA |
| Panc-AdenoCA     | 2fdffb06c-0d2f-4e1d-9756-bcb08a7f90af | 2  | 51491370  | 51494484  | 26 | 3114  | NA | NA | 26 | NA | NA | NA |
| Panc-AdenoCA     | 2fdffb06c-0d2f-4e1d-9756-bcb08a7f90af | 4  | 42781387  | 42781863  | 7  | 476   | 1  | 3  | 3  | NA | NA | NA |
| Panc-AdenoCA     | 2fdffb06c-0d2f-4e1d-9756-bcb08a7f90af | 5  | 106725680 | 106726230 | 6  | 550   | 1  | 2  | 3  | NA | NA | NA |
| Panc-AdenoCA     | 2fdffb06c-0d2f-4e1d-9756-bcb08a7f90af | 5  | 107808501 | 107811079 | 8  | 2578  | 1  | 1  | 6  | NA | NA | NA |
| Panc-AdenoCA     | 2fdffb06c-0d2f-4e1d-9756-bcb08a7f90af | 5  | 115759098 | 115769700 | 20 | 10602 | 2  | 4  | 13 | NA | NA | 1  |
| Panc-AdenoCA     | 2fdffb06c-0d2f-4e1d-9756-bcb08a7f90af | 6  | 30403086  | 30404606  | 7  | 1520  | NA | 3  | 3  | 1  | NA | NA |
| Panc-AdenoCA     | 2fdffb06c-0d2f-4e1d-9756-bcb08a7f90af | 7  | 98656424  | 98656432  | 6  | 8     | 2  | NA | 3  | NA | NA | 1  |
| Panc-AdenoCA     | 2fdffb06c-0d2f-4e1d-9756-bcb08a7f90af | 8  | 18739903  | 18745237  | 8  | 5334  | NA | 2  | 6  | NA | NA | NA |
| Panc-AdenoCA     | 2fdffb06c-0d2f-4e1d-9756-bcb08a7f90af | 18 | 25172750  | 25174569  | 9  | 1819  | 3  | 1  | 5  | NA | NA | NA |
| Panc-AdenoCA     | 2fdffb06c-0d2f-4e1d-9756-bcb08a7f90af | 18 | 25216210  | 25217185  | 25 | 975   | 4  | 4  | 17 | NA | NA | NA |
| Panc-AdenoCA     | 2fdffb06c-0d2f-4e1d-9756-bcb08a7f90af | X  | 48614493  | 48615104  | 6  | 611   | 1  | 3  | 2  | NA | NA | NA |
| Prost-AdenoCA    | 304c3e10-583c-421d-ab01-15c937d5014a  | 8  | 38315495  | 38315890  | 6  | 395   | 1  | 3  | 1  | 1  | NA | NA |
| Prost-AdenoCA    | 304c3e10-583c-421d-ab01-15c937d5014a  | 10 | 14235130  | 14235823  | 6  | 693   | 1  | 3  | 2  | NA | NA | NA |
| Prost-AdenoCA    | 304c3e10-583c-421d-ab01-15c937d5014a  | 10 | 103777753 | 103778511 | 7  | 758   | NA | 2  | 5  | NA | NA | NA |
| Prost-AdenoCA    | 306ef5bc-97d0-4312-ae0e-343c4e31d869  | 5  | 85748454  | 85749267  | 10 | 813   | NA | NA | NA | 1  | 9  | NA |
| Stomach-AdenoCA  | 30b9ab02-60f2-4974-85a9-874f247ae932  | 5  | 13552     | 17089     | 8  | 3537  | 4  | 3  | 1  | NA | NA | NA |
| Stomach-AdenoCA  | 30b9ab02-60f2-4974-85a9-874f247ae932  | 21 | 20696079  | 20698479  | 18 | 2400  | 5  | 9  | 4  | NA | NA | NA |
| Stomach-AdenoCA  | 30b9ab02-60f2-4974-85a9-874f247ae932  | 21 | 45014125  | 45021738  | 9  | 7613  | 3  | 3  | 3  | NA | NA | NA |
| Stomach-AdenoCA  | 30b9ab02-60f2-4974-85a9-874f247ae932  | 21 | 45027330  | 45030873  | 8  | 3543  | 1  | 1  | 6  | NA | NA | NA |

|                 |                                      |    |           |           |    |       |    |    |    |    |    |    |
|-----------------|--------------------------------------|----|-----------|-----------|----|-------|----|----|----|----|----|----|
| Stomach-AdenoCA | 30b9ab02-60f2-4974-85a9-874f247ae932 | 22 | 22053206  | 22057044  | 6  | 3838  | 2  | NA | 4  | NA | NA | NA |
| Stomach-AdenoCA | 30b9ab02-60f2-4974-85a9-874f247ae932 | 22 | 22070658  | 22072849  | 11 | 2191  | 3  | 4  | 3  | NA | 1  | NA |
| Stomach-AdenoCA | 30b9ab02-60f2-4974-85a9-874f247ae932 | 22 | 41786146  | 41790800  | 9  | 4654  | 1  | NA | 8  | NA | NA | NA |
| Stomach-AdenoCA | 30b9ab02-60f2-4974-85a9-874f247ae932 | 22 | 46578740  | 46587490  | 13 | 8750  | 3  | 3  | 7  | NA | NA | NA |
| Uterus-AdenoCA  | 31bc44b9-35ff-43fd-8a01-a834f3b1ce46 | 4  | 187386386 | 187386958 | 6  | 572   | NA | NA | 3  | 3  | NA | NA |
| Uterus-AdenoCA  | 31bc44b9-35ff-43fd-8a01-a834f3b1ce46 | 20 | 52915675  | 52916456  | 6  | 781   | 1  | NA | 2  | 3  | NA | NA |
| Uterus-AdenoCA  | 31bc44b9-35ff-43fd-8a01-a834f3b1ce46 | X  | 19577124  | 19577245  | 6  | 121   | NA | 1  | 3  | 1  | NA | 1  |
| Panc-AdenoCA    | 31c75873-abb4-4d88-9e2f-07497a6c892d | 1  | 6002874   | 6004192   | 10 | 1318  | 2  | 2  | 6  | NA | NA | NA |
| Panc-AdenoCA    | 31c75873-abb4-4d88-9e2f-07497a6c892d | 1  | 72728374  | 72729365  | 13 | 991   | 4  | 3  | 6  | NA | NA | NA |
| Panc-AdenoCA    | 31c75873-abb4-4d88-9e2f-07497a6c892d | 2  | 146357015 | 146359838 | 7  | 2823  | 1  | NA | 2  | 3  | 1  | NA |
| Panc-AdenoCA    | 31c75873-abb4-4d88-9e2f-07497a6c892d | 4  | 1331900   | 1339009   | 14 | 7109  | 5  | 6  | 3  | NA | NA | NA |
| Panc-AdenoCA    | 31c75873-abb4-4d88-9e2f-07497a6c892d | 4  | 114546618 | 114549514 | 10 | 2896  | 2  | 3  | 5  | NA | NA | NA |
| Panc-AdenoCA    | 31c75873-abb4-4d88-9e2f-07497a6c892d | 5  | 36974046  | 36979369  | 13 | 5323  | 2  | 1  | 10 | NA | NA | NA |
| Panc-AdenoCA    | 31c75873-abb4-4d88-9e2f-07497a6c892d | 5  | 179448245 | 179448674 | 8  | 429   | 1  | 4  | 3  | NA | NA | NA |
| Panc-AdenoCA    | 31c75873-abb4-4d88-9e2f-07497a6c892d | 6  | 131316849 | 131317331 | 7  | 482   | 2  | 4  | 1  | NA | NA | NA |
| Panc-AdenoCA    | 31c75873-abb4-4d88-9e2f-07497a6c892d | 6  | 146606598 | 146612066 | 9  | 5468  | NA | NA | 9  | NA | NA | NA |
| Panc-AdenoCA    | 31c75873-abb4-4d88-9e2f-07497a6c892d | 11 | 64887881  | 64895471  | 15 | 7590  | NA | 4  | 11 | NA | NA | NA |
| Panc-AdenoCA    | 31c75873-abb4-4d88-9e2f-07497a6c892d | 11 | 66000822  | 66003618  | 17 | 2796  | NA | 4  | 13 | NA | NA | NA |
| Panc-AdenoCA    | 31c75873-abb4-4d88-9e2f-07497a6c892d | 11 | 95897417  | 95901692  | 8  | 4275  | 1  | 4  | 3  | NA | NA | NA |
| Panc-AdenoCA    | 31c75873-abb4-4d88-9e2f-07497a6c892d | 11 | 111194229 | 111200185 | 25 | 5956  | 5  | 6  | 14 | NA | NA | NA |
| Panc-AdenoCA    | 31c75873-abb4-4d88-9e2f-07497a6c892d | 12 | 5751831   | 5752746   | 11 | 915   | 3  | 2  | 6  | NA | NA | NA |
| Panc-AdenoCA    | 31c75873-abb4-4d88-9e2f-07497a6c892d | 12 | 23393320  | 23393782  | 7  | 462   | NA | 3  | 4  | NA | NA | NA |
| Panc-AdenoCA    | 31c75873-abb4-4d88-9e2f-07497a6c892d | 12 | 25603984  | 25609214  | 8  | 5230  | 1  | 1  | 6  | NA | NA | NA |
| Panc-AdenoCA    | 31c75873-abb4-4d88-9e2f-07497a6c892d | 12 | 25725720  | 25730401  | 8  | 4681  | 1  | NA | 7  | NA | NA | NA |
| Panc-AdenoCA    | 31c75873-abb4-4d88-9e2f-07497a6c892d | 12 | 30819449  | 30826012  | 9  | 6563  | 3  | NA | 6  | NA | NA | NA |
| Panc-AdenoCA    | 31c75873-abb4-4d88-9e2f-07497a6c892d | 12 | 39515522  | 39522493  | 8  | 6971  | 1  | 2  | 3  | NA | 2  | NA |
| Panc-AdenoCA    | 31c75873-abb4-4d88-9e2f-07497a6c892d | 12 | 39530542  | 39533903  | 8  | 3361  | NA | 1  | 6  | NA | NA | 1  |
| Panc-AdenoCA    | 31c75873-abb4-4d88-9e2f-07497a6c892d | 18 | 21549509  | 21549890  | 14 | 381   | 1  | 1  | 11 | 1  | NA | NA |
| Panc-AdenoCA    | 31c75873-abb4-4d88-9e2f-07497a6c892d | 21 | 26166979  | 26170926  | 6  | 3947  | NA | NA | NA | 2  | 3  | 1  |
| Kidney-RCC      | 3232f7f1-b745-4232-a802-6699b6356efd | 5  | 86960849  | 86961444  | 8  | 595   | 3  | 4  | 1  | NA | NA | NA |
| Cervix-SCC      | 3269608c-5dd7-452a-976a-31ac971aac2f | 5  | 80182907  | 80186781  | 8  | 3874  | 1  | 2  | 5  | NA | NA | NA |
| Cervix-SCC      | 3269608c-5dd7-452a-976a-31ac971aac2f | 9  | 8855246   | 8856661   | 7  | 1415  | NA | 1  | 6  | NA | NA | NA |
| Cervix-SCC      | 3269608c-5dd7-452a-976a-31ac971aac2f | 12 | 18525813  | 18528600  | 8  | 2787  | NA | NA | 8  | NA | NA | NA |
| Prost-AdenoCA   | 32d8c373-b5c8-420b-9808-8812b5501649 | 9  | 617133    | 617507    | 10 | 374   | NA | NA | NA | 3  | 6  | 1  |
| Panc-AdenoCA    | 32fa6457-c8bd-4d26-8106-925baf13df68 | 3  | 79146207  | 79147530  | 12 | 1323  | 1  | 4  | 7  | NA | NA | NA |
| Panc-AdenoCA    | 32fa6457-c8bd-4d26-8106-925baf13df68 | 6  | 12430257  | 12431188  | 9  | 931   | 2  | 2  | 5  | NA | NA | NA |
| Panc-AdenoCA    | 32fa6457-c8bd-4d26-8106-925baf13df68 | 6  | 32215073  | 32217198  | 10 | 2125  | 2  | 3  | 5  | NA | NA | NA |
| Panc-AdenoCA    | 32fa6457-c8bd-4d26-8106-925baf13df68 | 6  | 55556148  | 55559961  | 10 | 3813  | 1  | 2  | 7  | NA | NA | NA |
| Panc-AdenoCA    | 32fa6457-c8bd-4d26-8106-925baf13df68 | 8  | 111576486 | 111580026 | 28 | 3540  | 3  | 16 | 9  | NA | NA | NA |
| Panc-AdenoCA    | 32fa6457-c8bd-4d26-8106-925baf13df68 | 8  | 114839638 | 114840730 | 7  | 1092  | NA | 6  | 1  | NA | NA | NA |
| Panc-AdenoCA    | 32fa6457-c8bd-4d26-8106-925baf13df68 | 9  | 215956    | 217068    | 11 | 1112  | 1  | 3  | 7  | NA | NA | NA |
| Panc-AdenoCA    | 32fa6457-c8bd-4d26-8106-925baf13df68 | 18 | 22195308  | 22196271  | 12 | 963   | 2  | 3  | 7  | NA | NA | NA |
| Panc-AdenoCA    | 32fa6457-c8bd-4d26-8106-925baf13df68 | 18 | 22900447  | 22906247  | 7  | 5800  | 1  | 1  | 3  | NA | 1  | 1  |
| Panc-AdenoCA    | 32fa6457-c8bd-4d26-8106-925baf13df68 | 18 | 23193596  | 23201842  | 12 | 8246  | NA | 3  | 4  | NA | 4  | 1  |
| Panc-AdenoCA    | 32fa6457-c8bd-4d26-8106-925baf13df68 | 18 | 23759991  | 23762018  | 7  | 2027  | NA | 2  | 5  | NA | NA | NA |
| Panc-AdenoCA    | 33070975-0f35-4518-9ffb-4c6170c32534 | 1  | 60727853  | 60731921  | 14 | 4068  | 5  | 2  | 7  | NA | NA | NA |
| Panc-AdenoCA    | 33070975-0f35-4518-9ffb-4c6170c32534 | 1  | 60752006  | 60753105  | 8  | 1099  | 2  | 2  | 4  | NA | NA | NA |
| Panc-AdenoCA    | 33070975-0f35-4518-9ffb-4c6170c32534 | 13 | 20755224  | 20768265  | 17 | 13041 | 3  | 6  | 8  | NA | NA | NA |
| Eso-AdenoCa     | 33992441-4f34-42f2-ba87-6ddd227f2250 | 11 | 69637567  | 69643054  | 19 | 5487  | 1  | 3  | 15 | NA | NA | NA |
| Eso-AdenoCa     | 33992441-4f34-42f2-ba87-6ddd227f2250 | 16 | 13892109  | 13892674  | 12 | 565   | 1  | 6  | 5  | NA | NA | NA |
| Panc-AdenoCA    | 33bcd589-80db-4a58-8f83-a48cb60e0fda | 9  | 34178736  | 34189069  | 15 | 10333 | 1  | NA | 14 | NA | NA | NA |
| Panc-AdenoCA    | 33bcd589-80db-4a58-8f83-a48cb60e0fda | 9  | 34413381  | 34414832  | 14 | 1451  | NA | NA | 14 | NA | NA | NA |
| Panc-AdenoCA    | 33bcd589-80db-4a58-8f83-a48cb60e0fda | 9  | 35811655  | 35817261  | 23 | 5606  | 1  | NA | 22 | NA | NA | NA |
| Panc-AdenoCA    | 33bcd589-80db-4a58-8f83-a48cb60e0fda | 13 | 48082328  | 48085919  | 11 | 3591  | NA | 5  | 6  | NA | NA | NA |
| Panc-AdenoCA    | 33bcd589-80db-4a58-8f83-a48cb60e0fda | 15 | 81567053  | 81569648  | 6  | 2595  | 1  | 4  | 1  | NA | NA | NA |
| Panc-AdenoCA    | 33bcd589-80db-4a58-8f83-a48cb60e0fda | 22 | 39071751  | 39076127  | 7  | 4376  | NA | 4  | 3  | NA | NA | NA |
| Prost-AdenoCA   | 33de44a2-bec1-402d-872c-d78c1f2d52b3 | 1  | 189428428 | 189432274 | 9  | 3846  | NA | 7  | 2  | NA | NA | NA |
| Prost-AdenoCA   | 33de44a2-bec1-402d-872c-d78c1f2d52b3 | 1  | 192282348 | 192282888 | 9  | 540   | NA | 6  | 3  | NA | NA | NA |
| Skin-Melanoma   | 3433b1f3-59d1-4ac2-9bbf-e0c4042b4ddc | 1  | 99099707  | 99101606  | 19 | 1899  | NA | 16 | 3  | NA | NA | NA |
| Skin-Melanoma   | 3433b1f3-59d1-4ac2-9bbf-e0c4042b4ddc | 1  | 145196317 | 145200962 | 10 | 4645  | NA | 1  | 9  | NA | NA | NA |

|                 |                                      |    |           |           |    |       |    |    |    |    |    |    |
|-----------------|--------------------------------------|----|-----------|-----------|----|-------|----|----|----|----|----|----|
| Skin-Melanoma   | 3433b1f3-59d1-4ac2-9bbf-e0c4042b4ddc | 1  | 145553426 | 145555391 | 9  | 1965  | NA | 5  | 4  | NA | NA | NA |
| Skin-Melanoma   | 3433b1f3-59d1-4ac2-9bbf-e0c4042b4ddc | 1  | 152283425 | 152286374 | 20 | 2949  | 1  | 12 | 6  | NA | 1  | NA |
| Skin-Melanoma   | 3433b1f3-59d1-4ac2-9bbf-e0c4042b4ddc | 5  | 49752443  | 49754442  | 7  | 1999  | NA | NA | 7  | NA | NA | NA |
| Skin-Melanoma   | 3433b1f3-59d1-4ac2-9bbf-e0c4042b4ddc | 5  | 52104785  | 52108184  | 11 | 3399  | 1  | 7  | 3  | NA | NA | NA |
| Skin-Melanoma   | 3433b1f3-59d1-4ac2-9bbf-e0c4042b4ddc | 5  | 85794472  | 85795239  | 8  | 767   | 1  | 1  | 6  | NA | NA | NA |
| Skin-Melanoma   | 3433b1f3-59d1-4ac2-9bbf-e0c4042b4ddc | 6  | 63351584  | 63358273  | 24 | 6689  | 2  | 7  | 15 | NA | NA | NA |
| Skin-Melanoma   | 3433b1f3-59d1-4ac2-9bbf-e0c4042b4ddc | 8  | 16957675  | 16957960  | 7  | 285   | 3  | 4  | NA | NA | NA | NA |
| Skin-Melanoma   | 3433b1f3-59d1-4ac2-9bbf-e0c4042b4ddc | 8  | 104321043 | 104321844 | 10 | 801   | 2  | NA | 8  | NA | NA | NA |
| Skin-Melanoma   | 3433b1f3-59d1-4ac2-9bbf-e0c4042b4ddc | 11 | 59244894  | 59247877  | 13 | 2983  | NA | NA | 13 | NA | NA | NA |
| Skin-Melanoma   | 3433b1f3-59d1-4ac2-9bbf-e0c4042b4ddc | 11 | 78277095  | 78278866  | 8  | 1771  | NA | 5  | 2  | NA | 1  | NA |
| Skin-Melanoma   | 3433b1f3-59d1-4ac2-9bbf-e0c4042b4ddc | 11 | 79990358  | 79992630  | 13 | 2272  | 1  | 3  | 9  | NA | NA | NA |
| Skin-Melanoma   | 3433b1f3-59d1-4ac2-9bbf-e0c4042b4ddc | 11 | 83736076  | 83736488  | 7  | 412   | NA | 7  | NA | NA | NA | NA |
| Skin-Melanoma   | 3433b1f3-59d1-4ac2-9bbf-e0c4042b4ddc | 11 | 119842389 | 119843970 | 7  | 1581  | 3  | NA | 4  | NA | NA | NA |
| Skin-Melanoma   | 3433b1f3-59d1-4ac2-9bbf-e0c4042b4ddc | 18 | 39636477  | 39647104  | 22 | 10627 | NA | 2  | 19 | 1  | NA | NA |
| Skin-Melanoma   | 3433b1f3-59d1-4ac2-9bbf-e0c4042b4ddc | 18 | 44353719  | 44358675  | 8  | 4956  | 2  | 1  | 3  | NA | NA | 2  |
| Skin-Melanoma   | 3433b1f3-59d1-4ac2-9bbf-e0c4042b4ddc | 18 | 54258965  | 54259863  | 15 | 898   | 1  | 2  | 11 | NA | NA | 1  |
| Skin-Melanoma   | 3433b1f3-59d1-4ac2-9bbf-e0c4042b4ddc | 20 | 13485902  | 13486642  | 11 | 740   | 2  | 3  | 6  | NA | NA | NA |
| Skin-Melanoma   | 3433b1f3-59d1-4ac2-9bbf-e0c4042b4ddc | 22 | 40353575  | 40357434  | 8  | 3859  | 4  | NA | 1  | NA | NA | 3  |
| Skin-Melanoma   | 3433b1f3-59d1-4ac2-9bbf-e0c4042b4ddc | X  | 98066236  | 98072151  | 8  | 5915  | NA | NA | 3  | 1  | NA | 4  |
| Liver-HCC       | 343fbc2-f30c-4ffa-a0b3-f5bb21e5e70b  | 5  | 8150690   | 8153720   | 7  | 3030  | 1  | 4  | 2  | NA | NA | NA |
| Liver-HCC       | 343fbc2-f30c-4ffa-a0b3-f5bb21e5e70b  | 19 | 20628562  | 20629397  | 6  | 835   | NA | NA | 2  | 2  | 1  | 1  |
| Stomach-AdenoCA | 34a445c2-1eb4-4a9f-8838-cddc2f82aae4 | 7  | 89514888  | 89515527  | 10 | 639   | 3  | 4  | 3  | NA | NA | NA |
| Stomach-AdenoCA | 34a445c2-1eb4-4a9f-8838-cddc2f82aae4 | 9  | 11007200  | 11012599  | 9  | 5399  | 1  | NA | NA | 1  | 2  | 5  |
| Stomach-AdenoCA | 34a445c2-1eb4-4a9f-8838-cddc2f82aae4 | 11 | 24268684  | 24274247  | 10 | 5563  | NA | NA | NA | 1  | 7  | 2  |
| Kidney-RCC      | 34ab4c57-5240-4af7-a329-a5ab55934fd4 | 3  | 76631272  | 76632321  | 10 | 1049  | 3  | 5  | 2  | NA | NA | NA |
| Skin-Melanoma   | 351db483-a70e-496d-b70a-7449875121ee | 6  | 48519266  | 48520577  | 14 | 1311  | NA | NA | 14 | NA | NA | NA |
| Skin-Melanoma   | 351db483-a70e-496d-b70a-7449875121ee | 6  | 56011620  | 56012129  | 8  | 509   | NA | 7  | 1  | NA | NA | NA |
| Skin-Melanoma   | 351db483-a70e-496d-b70a-7449875121ee | 7  | 132176464 | 132176694 | 9  | 230   | 3  | 2  | 4  | NA | NA | NA |
| Skin-Melanoma   | 351db483-a70e-496d-b70a-7449875121ee | 7  | 133971920 | 133973224 | 10 | 1304  | 2  | 2  | 6  | NA | NA | NA |
| Skin-Melanoma   | 351db483-a70e-496d-b70a-7449875121ee | 7  | 134167707 | 134172354 | 12 | 4647  | 3  | 8  | 1  | NA | NA | NA |
| Skin-Melanoma   | 351db483-a70e-496d-b70a-7449875121ee | 7  | 134195163 | 134199251 | 9  | 4088  | 1  | 5  | 3  | NA | NA | NA |
| Skin-Melanoma   | 351db483-a70e-496d-b70a-7449875121ee | 7  | 134479122 | 134484696 | 13 | 5574  | 4  | 4  | 5  | NA | NA | NA |
| Skin-Melanoma   | 351db483-a70e-496d-b70a-7449875121ee | 11 | 59614955  | 59621490  | 28 | 6535  | 8  | 8  | 8  | 2  | 1  | 1  |
| Skin-Melanoma   | 351db483-a70e-496d-b70a-7449875121ee | 11 | 60046782  | 60047256  | 8  | 474   | 1  | 6  | 1  | NA | NA | NA |
| Skin-Melanoma   | 351db483-a70e-496d-b70a-7449875121ee | 11 | 60917247  | 60920104  | 8  | 2857  | 1  | 4  | 3  | NA | NA | NA |
| Skin-Melanoma   | 351db483-a70e-496d-b70a-7449875121ee | 11 | 64688220  | 64694103  | 7  | 5883  | 1  | 4  | 2  | NA | NA | NA |
| Skin-Melanoma   | 351db483-a70e-496d-b70a-7449875121ee | 11 | 69952563  | 69958447  | 18 | 5884  | 1  | 6  | 11 | NA | NA | NA |
| Skin-Melanoma   | 351db483-a70e-496d-b70a-7449875121ee | 11 | 70012213  | 70015495  | 8  | 3282  | NA | 3  | 5  | NA | NA | NA |
| Skin-Melanoma   | 351db483-a70e-496d-b70a-7449875121ee | 11 | 72414867  | 72416111  | 11 | 1244  | NA | 5  | 6  | NA | NA | NA |
| Skin-Melanoma   | 351db483-a70e-496d-b70a-7449875121ee | 11 | 74204431  | 74208967  | 7  | 4536  | 1  | 1  | 5  | NA | NA | NA |
| Skin-Melanoma   | 351db483-a70e-496d-b70a-7449875121ee | 11 | 76227059  | 76228882  | 20 | 1823  | 1  | 13 | 5  | 1  | NA | NA |
| Skin-Melanoma   | 351db483-a70e-496d-b70a-7449875121ee | 11 | 77878766  | 77880966  | 8  | 2200  | 1  | 4  | 3  | NA | NA | NA |
| Skin-Melanoma   | 351db483-a70e-496d-b70a-7449875121ee | 11 | 79418530  | 79419165  | 7  | 635   | 1  | 4  | 2  | NA | NA | NA |
| Skin-Melanoma   | 351db483-a70e-496d-b70a-7449875121ee | 11 | 93338331  | 93339834  | 18 | 1503  | 3  | 12 | 3  | NA | NA | NA |
| Skin-Melanoma   | 351db483-a70e-496d-b70a-7449875121ee | 11 | 100828950 | 100836428 | 9  | 7478  | 1  | 5  | 3  | NA | NA | NA |
| Skin-Melanoma   | 351db483-a70e-496d-b70a-7449875121ee | 11 | 102423845 | 102425038 | 9  | 1193  | 2  | 4  | 3  | NA | NA | NA |
| Skin-Melanoma   | 351db483-a70e-496d-b70a-7449875121ee | 11 | 103840691 | 103844616 | 11 | 3925  | 2  | 5  | 4  | NA | NA | NA |
| Skin-Melanoma   | 351db483-a70e-496d-b70a-7449875121ee | 11 | 104446515 | 104447425 | 7  | 910   | 1  | 4  | 2  | NA | NA | NA |
| Skin-Melanoma   | 351db483-a70e-496d-b70a-7449875121ee | 11 | 105254961 | 105255961 | 9  | 1000  | 1  | 4  | 4  | NA | NA | NA |
| Skin-Melanoma   | 351db483-a70e-496d-b70a-7449875121ee | 11 | 105708249 | 105709844 | 8  | 1595  | 1  | 1  | 6  | NA | NA | NA |
| Skin-Melanoma   | 351db483-a70e-496d-b70a-7449875121ee | 11 | 108447076 | 108447699 | 10 | 623   | NA | 4  | 6  | NA | NA | NA |
| Skin-Melanoma   | 351db483-a70e-496d-b70a-7449875121ee | 11 | 113864816 | 113866432 | 8  | 1616  | NA | 6  | 2  | NA | NA | NA |
| Skin-Melanoma   | 351db483-a70e-496d-b70a-7449875121ee | 11 | 114853488 | 114854147 | 17 | 659   | 3  | 11 | 3  | NA | NA | NA |
| Skin-Melanoma   | 351db483-a70e-496d-b70a-7449875121ee | 11 | 119165674 | 119166369 | 8  | 695   | 2  | 5  | 1  | NA | NA | NA |
| Skin-Melanoma   | 351db483-a70e-496d-b70a-7449875121ee | 20 | 31877101  | 31881290  | 8  | 4189  | NA | NA | 8  | NA | NA | NA |
| Skin-Melanoma   | 351db483-a70e-496d-b70a-7449875121ee | 20 | 47238838  | 47240076  | 7  | 1238  | NA | NA | 7  | NA | NA | NA |
| Prost-AdenoCA   | 35553150-e4ef-4539-b220-259f2d634bd7 | 9  | 103373078 | 103377495 | 7  | 4417  | NA | 5  | 2  | NA | NA | NA |
| Breast-AdenoCa  | 3585e133-b3c1-4d90-b5f2-2b867e0ae0ec | 1  | 216935393 | 216942618 | 10 | 7225  | NA | 5  | 4  | 1  | NA | NA |
| Breast-AdenoCa  | 3585e133-b3c1-4d90-b5f2-2b867e0ae0ec | 6  | 51693922  | 51696762  | 9  | 2840  | 2  | 6  | 1  | NA | NA | NA |
| Breast-AdenoCa  | 3585e133-b3c1-4d90-b5f2-2b867e0ae0ec | 6  | 72643589  | 72644214  | 7  | 625   | NA | NA | NA | 4  | 3  | NA |

|                |                                      |    |           |           |    |       |    |    |    |    |    |    |
|----------------|--------------------------------------|----|-----------|-----------|----|-------|----|----|----|----|----|----|
| Breast-AdenoCa | 3585e133-b3c1-4d90-b5f2-2b867e0ae0ec | 8  | 38871838  | 38876379  | 12 | 4541  | NA | 8  | 4  | NA | NA | NA |
| Breast-AdenoCa | 3585e133-b3c1-4d90-b5f2-2b867e0ae0ec | 8  | 39157879  | 39161454  | 16 | 3575  | 2  | 9  | 5  | NA | NA | NA |
| Breast-AdenoCa | 3585e133-b3c1-4d90-b5f2-2b867e0ae0ec | 11 | 75778063  | 75780986  | 8  | 2923  | NA | 5  | 3  | NA | NA | NA |
| Breast-AdenoCa | 3585e133-b3c1-4d90-b5f2-2b867e0ae0ec | 11 | 90367209  | 90372240  | 7  | 5031  | NA | 3  | 4  | NA | NA | NA |
| Breast-AdenoCa | 3585e133-b3c1-4d90-b5f2-2b867e0ae0ec | 18 | 12050011  | 12050765  | 6  | 754   | 4  | 1  | 1  | NA | NA | NA |
| Breast-AdenoCa | 3585e133-b3c1-4d90-b5f2-2b867e0ae0ec | 18 | 26957215  | 26962773  | 12 | 5558  | 3  | 6  | 3  | NA | NA | NA |
| Breast-AdenoCa | 3585e133-b3c1-4d90-b5f2-2b867e0ae0ec | 18 | 26980856  | 26986033  | 8  | 5177  | 2  | 2  | 4  | NA | NA | NA |
| Breast-AdenoCa | 3585e133-b3c1-4d90-b5f2-2b867e0ae0ec | 18 | 50924496  | 50927781  | 10 | 3285  | 1  | 7  | 2  | NA | NA | NA |
| Breast-AdenoCa | 3585e133-b3c1-4d90-b5f2-2b867e0ae0ec | 22 | 51018331  | 51022841  | 6  | 4510  | 1  | NA | 4  | NA | 1  | NA |
| Skin-Melanoma  | 35a74e53-16ff-4764-8397-6a9b02dfe733 | 5  | 8002271   | 8002599   | 6  | 328   | 1  | 1  | 4  | NA | NA | NA |
| Skin-Melanoma  | 35a74e53-16ff-4764-8397-6a9b02dfe733 | 5  | 30935870  | 30942023  | 8  | 6153  | 1  | 3  | 3  | NA | 1  | NA |
| Skin-Melanoma  | 35a74e53-16ff-4764-8397-6a9b02dfe733 | 5  | 30954325  | 30955282  | 10 | 957   | 1  | 1  | 8  | NA | NA | NA |
| Skin-Melanoma  | 35a74e53-16ff-4764-8397-6a9b02dfe733 | 5  | 41884278  | 41885025  | 11 | 747   | NA | 2  | 9  | NA | NA | NA |
| Skin-Melanoma  | 35a74e53-16ff-4764-8397-6a9b02dfe733 | 5  | 50276592  | 50286575  | 20 | 9983  | 2  | 10 | 8  | NA | NA | NA |
| Skin-Melanoma  | 35a74e53-16ff-4764-8397-6a9b02dfe733 | 6  | 12117724  | 12121023  | 11 | 3299  | 2  | 4  | 5  | NA | NA | NA |
| Skin-Melanoma  | 35a74e53-16ff-4764-8397-6a9b02dfe733 | 11 | 56014411  | 56019007  | 15 | 4596  | 2  | 9  | 4  | NA | NA | NA |
| Skin-Melanoma  | 35a74e53-16ff-4764-8397-6a9b02dfe733 | 11 | 66858083  | 66859446  | 13 | 1363  | 2  | 2  | 9  | NA | NA | NA |
| Skin-Melanoma  | 35a74e53-16ff-4764-8397-6a9b02dfe733 | 11 | 68219380  | 68227598  | 17 | 8218  | 1  | NA | 15 | NA | 1  | NA |
| Skin-Melanoma  | 35a74e53-16ff-4764-8397-6a9b02dfe733 | 11 | 76588830  | 76590361  | 7  | 1531  | 1  | 2  | 4  | NA | NA | NA |
| Skin-Melanoma  | 35a74e53-16ff-4764-8397-6a9b02dfe733 | 11 | 95745654  | 95752418  | 15 | 6764  | 2  | 5  | 8  | NA | NA | NA |
| Skin-Melanoma  | 35a74e53-16ff-4764-8397-6a9b02dfe733 | 16 | 74538578  | 74542723  | 7  | 4145  | NA | 4  | 2  | 1  | NA | NA |
| Bone-Leiomyo   | 35c797fd-ca81-4cef-b6c4-7e3776f661b3 | 1  | 193607565 | 193611046 | 12 | 3481  | 2  | 6  | 4  | NA | NA | NA |
| Bone-Leiomyo   | 35c797fd-ca81-4cef-b6c4-7e3776f661b3 | 1  | 233343879 | 233345939 | 10 | 2060  | 2  | 5  | 3  | NA | NA | NA |
| Bone-Leiomyo   | 35c797fd-ca81-4cef-b6c4-7e3776f661b3 | 3  | 72896630  | 72900624  | 9  | 3994  | 1  | 6  | 2  | NA | NA | NA |
| Bone-Leiomyo   | 35c797fd-ca81-4cef-b6c4-7e3776f661b3 | 5  | 2960269   | 2961607   | 6  | 1338  | NA | 1  | 5  | NA | NA | NA |
| Bone-Leiomyo   | 35c797fd-ca81-4cef-b6c4-7e3776f661b3 | 6  | 121478404 | 121494266 | 18 | 15862 | 5  | 6  | 7  | NA | NA | NA |
| Bone-Leiomyo   | 35c797fd-ca81-4cef-b6c4-7e3776f661b3 | 7  | 85900444  | 85901088  | 7  | 644   | 1  | 2  | 4  | NA | NA | NA |
| Bone-Leiomyo   | 35c797fd-ca81-4cef-b6c4-7e3776f661b3 | 7  | 103708823 | 103712173 | 18 | 3350  | 9  | 7  | 2  | NA | NA | NA |
| Bone-Leiomyo   | 35c797fd-ca81-4cef-b6c4-7e3776f661b3 | 7  | 133851887 | 133852870 | 7  | 983   | NA | 2  | 5  | NA | NA | NA |
| Bone-Leiomyo   | 35c797fd-ca81-4cef-b6c4-7e3776f661b3 | 7  | 137289303 | 137290410 | 11 | 1107  | 4  | 4  | 3  | NA | NA | NA |
| Bone-Leiomyo   | 35c797fd-ca81-4cef-b6c4-7e3776f661b3 | 9  | 21590129  | 21591162  | 8  | 1033  | 2  | 6  | NA | NA | NA | NA |
| Bone-Leiomyo   | 35c797fd-ca81-4cef-b6c4-7e3776f661b3 | 12 | 46936551  | 46939392  | 7  | 2841  | 4  | 2  | 1  | NA | NA | NA |
| Bone-Leiomyo   | 35c797fd-ca81-4cef-b6c4-7e3776f661b3 | 12 | 47319061  | 47323364  | 9  | 4303  | 2  | 6  | 1  | NA | NA | NA |
| Bone-Leiomyo   | 35c797fd-ca81-4cef-b6c4-7e3776f661b3 | 12 | 52199907  | 52205666  | 8  | 5759  | NA | 3  | 5  | NA | NA | NA |
| Bone-Leiomyo   | 35c797fd-ca81-4cef-b6c4-7e3776f661b3 | 12 | 64197000  | 64197987  | 8  | 987   | NA | 6  | 2  | NA | NA | NA |
| Bone-Leiomyo   | 35c797fd-ca81-4cef-b6c4-7e3776f661b3 | 12 | 64286787  | 64290091  | 11 | 3304  | 3  | 4  | 4  | NA | NA | NA |
| Bone-Leiomyo   | 35c797fd-ca81-4cef-b6c4-7e3776f661b3 | 12 | 65727687  | 65730800  | 24 | 3113  | 7  | 10 | 7  | NA | NA | NA |
| Bone-Leiomyo   | 35c797fd-ca81-4cef-b6c4-7e3776f661b3 | 12 | 69786454  | 69790193  | 8  | 3739  | 2  | 4  | 2  | NA | NA | NA |
| Bone-Leiomyo   | 35c797fd-ca81-4cef-b6c4-7e3776f661b3 | 12 | 72659753  | 72661008  | 11 | 1255  | NA | 5  | 6  | NA | NA | NA |
| Bone-Leiomyo   | 35c797fd-ca81-4cef-b6c4-7e3776f661b3 | 12 | 79177979  | 79183759  | 8  | 5780  | 2  | 2  | 4  | NA | NA | NA |
| Bone-Leiomyo   | 35c797fd-ca81-4cef-b6c4-7e3776f661b3 | 12 | 79331360  | 79332118  | 8  | 758   | 1  | 4  | 3  | NA | NA | NA |
| Bone-Leiomyo   | 35c797fd-ca81-4cef-b6c4-7e3776f661b3 | 12 | 93132928  | 93135755  | 9  | 2827  | 1  | 3  | 5  | NA | NA | NA |
| Bone-Leiomyo   | 35c797fd-ca81-4cef-b6c4-7e3776f661b3 | 13 | 64087764  | 64090805  | 11 | 3041  | 6  | 4  | 1  | NA | NA | NA |
| Bone-Leiomyo   | 35c797fd-ca81-4cef-b6c4-7e3776f661b3 | 15 | 79077611  | 79078795  | 6  | 1184  | 2  | 2  | 2  | NA | NA | NA |
| Bone-Leiomyo   | 35c797fd-ca81-4cef-b6c4-7e3776f661b3 | 16 | 48589221  | 48596365  | 15 | 7144  | 7  | 3  | 5  | NA | NA | NA |
| Bone-Leiomyo   | 35c797fd-ca81-4cef-b6c4-7e3776f661b3 | 19 | 37743700  | 37745049  | 6  | 1349  | 1  | 2  | 3  | NA | NA | NA |
| Bone-Leiomyo   | 35c797fd-ca81-4cef-b6c4-7e3776f661b3 | X  | 144476073 | 144484736 | 11 | 8663  | 2  | 5  | 3  | NA | 1  | NA |
| Liver-HCC      | 35cca3b8-c623-11e3-bf01-24c6515278c0 | 1  | 240983185 | 240985216 | 7  | 2031  | 1  | 4  | 2  | NA | NA | NA |
| Ovary-AdenoCA  | 35ceba07-0759-4f8e-b076-af821a528cf0 | 2  | 152089252 | 152089261 | 7  | 9     | NA | NA | 2  | NA | 1  | 4  |
| Ovary-AdenoCA  | 35ceba07-0759-4f8e-b076-af821a528cf0 | X  | 82395435  | 82395445  | 6  | 10    | NA | NA | 2  | 1  | NA | 3  |
| Liver-HCC      | 35e33a7a-c622-11e3-bf01-24c6515278c0 | 4  | 32108913  | 32111129  | 6  | 2216  | 1  | NA | 2  | 1  | 1  | 1  |
| Prost-AdenoCA  | 36962459-e81f-4b8c-a08d-df60ef3283a3 | 1  | 95700821  | 95704711  | 7  | 3890  | 2  | 1  | 4  | NA | NA | NA |
| Prost-AdenoCA  | 36962459-e81f-4b8c-a08d-df60ef3283a3 | 1  | 100041691 | 100042103 | 7  | 412   | 1  | 2  | 4  | NA | NA | NA |
| Prost-AdenoCA  | 36962459-e81f-4b8c-a08d-df60ef3283a3 | 8  | 22220045  | 22221816  | 7  | 1771  | NA | 4  | 3  | NA | NA | NA |
| Lung-SCC       | 369c06f2-8904-49cb-99d1-dd297ed0cd0c | 2  | 27661368  | 27664773  | 13 | 3405  | 3  | 2  | 8  | NA | NA | NA |
| Lung-SCC       | 369c06f2-8904-49cb-99d1-dd297ed0cd0c | 3  | 50142181  | 50151785  | 33 | 9604  | 14 | 6  | 13 | NA | NA | NA |
| Lung-SCC       | 369c06f2-8904-49cb-99d1-dd297ed0cd0c | 3  | 170732417 | 170735573 | 8  | 3156  | 1  | 3  | 4  | NA | NA | NA |
| Lung-SCC       | 369c06f2-8904-49cb-99d1-dd297ed0cd0c | 7  | 44696893  | 44699017  | 6  | 2124  | NA | 5  | 1  | NA | NA | NA |
| Lung-SCC       | 369c06f2-8904-49cb-99d1-dd297ed0cd0c | 10 | 120926935 | 120930764 | 12 | 3829  | NA | 3  | 9  | NA | NA | NA |
| Lung-SCC       | 369c06f2-8904-49cb-99d1-dd297ed0cd0c | 15 | 97742787  | 97755127  | 25 | 12340 | 5  | 9  | 11 | NA | NA | NA |

|                |                                      |    |           |           |    |       |    |    |    |    |    |    |
|----------------|--------------------------------------|----|-----------|-----------|----|-------|----|----|----|----|----|----|
| Lung-SCC       | 369c06f2-8904-49cb-99d1-dd297ed0cd0c | 16 | 233752    | 237568    | 8  | 3816  | 2  | 3  | 2  | NA | 1  | NA |
| Lung-SCC       | 369c06f2-8904-49cb-99d1-dd297ed0cd0c | 18 | 20182223  | 20182898  | 10 | 675   | 1  | 3  | 6  | NA | NA | NA |
| Lung-SCC       | 369c06f2-8904-49cb-99d1-dd297ed0cd0c | 20 | 32394343  | 32395943  | 8  | 1600  | NA | 3  | 5  | NA | NA | NA |
| Lung-SCC       | 369c06f2-8904-49cb-99d1-dd297ed0cd0c | X  | 95295252  | 95308215  | 14 | 12963 | 8  | 1  | 5  | NA | NA | NA |
| Breast-AdenoCa | 36d1a85e-a09b-4537-86e0-eaf1eb03aed8 | 15 | 26844965  | 26857792  | 14 | 12827 | 5  | 3  | 6  | NA | NA | NA |
| Breast-AdenoCa | 36d1a85e-a09b-4537-86e0-eaf1eb03aed8 | 15 | 32214285  | 32217089  | 10 | 2804  | 5  | 2  | 2  | NA | NA | 1  |
| Liver-HCC      | 36d9c1aa-c623-11e3-bf01-24c6515278c0 | 5  | 162569718 | 162570149 | 6  | 431   | NA | NA | 6  | NA | NA | NA |
| Liver-HCC      | 36d9c1aa-c623-11e3-bf01-24c6515278c0 | 18 | 3200005   | 3206569   | 24 | 6564  | 9  | 8  | 7  | NA | NA | NA |
| Liver-HCC      | 36e1d9cc-32ec-4a0a-8fb1-c46f058a6fb8 | 12 | 19462262  | 19463954  | 6  | 1692  | 2  | 3  | 1  | NA | NA | NA |
| Eso-AdenoCa    | 371235d9-55b8-40a7-8cd6-baa7c2ad0493 | 2  | 82682791  | 82683363  | 6  | 572   | NA | NA | NA | NA | 4  | 2  |
| Eso-AdenoCa    | 371235d9-55b8-40a7-8cd6-baa7c2ad0493 | 5  | 99780565  | 99784988  | 6  | 4423  | NA | NA | NA | 2  | 1  | 3  |
| Eso-AdenoCa    | 371235d9-55b8-40a7-8cd6-baa7c2ad0493 | 22 | 22291707  | 22293262  | 12 | 1555  | NA | 5  | 7  | NA | NA | NA |
| CNS-GBM        | 374cbd87-428e-4509-85c1-b7d3302c30a0 | 8  | 128173904 | 128177243 | 6  | 3339  | 2  | NA | 2  | 1  | NA | 1  |
| CNS-GBM        | 374cbd87-428e-4509-85c1-b7d3302c30a0 | 9  | 21048587  | 21052552  | 6  | 3965  | NA | 4  | 2  | NA | NA | NA |
| CNS-GBM        | 374cbd87-428e-4509-85c1-b7d3302c30a0 | 9  | 24306938  | 24312098  | 7  | 5160  | 3  | 1  | NA | 2  | NA | 1  |
| Ovary-AdenoCA  | 375221f8-77b2-4414-8df8-3c2c8048adba | 2  | 7775075   | 7777408   | 7  | 2333  | NA | 1  | 5  | 1  | NA | NA |
| Ovary-AdenoCA  | 375221f8-77b2-4414-8df8-3c2c8048adba | 4  | 42616972  | 42621217  | 9  | 4245  | 3  | 2  | 4  | NA | NA | NA |
| Ovary-AdenoCA  | 375221f8-77b2-4414-8df8-3c2c8048adba | 5  | 50132813  | 50133346  | 8  | 533   | NA | 6  | 2  | NA | NA | NA |
| Ovary-AdenoCA  | 375221f8-77b2-4414-8df8-3c2c8048adba | 7  | 145379030 | 145381492 | 13 | 2462  | 2  | 8  | 3  | NA | NA | NA |
| Ovary-AdenoCA  | 375221f8-77b2-4414-8df8-3c2c8048adba | 10 | 36154184  | 36161642  | 22 | 7458  | 6  | 12 | 4  | NA | NA | NA |
| Ovary-AdenoCA  | 375221f8-77b2-4414-8df8-3c2c8048adba | 14 | 86424955  | 86426211  | 6  | 1256  | 1  | 2  | 3  | NA | NA | NA |
| Ovary-AdenoCA  | 375221f8-77b2-4414-8df8-3c2c8048adba | 17 | 18675419  | 18676687  | 9  | 1268  | 1  | 6  | 2  | NA | NA | NA |
| Ovary-AdenoCA  | 375221f8-77b2-4414-8df8-3c2c8048adba | 17 | 21411887  | 21414340  | 9  | 2453  | NA | 5  | 4  | NA | NA | NA |
| Ovary-AdenoCA  | 375221f8-77b2-4414-8df8-3c2c8048adba | 19 | 28624532  | 28630736  | 12 | 6204  | 2  | 7  | 2  | 1  | NA | NA |
| Ovary-AdenoCA  | 375221f8-77b2-4414-8df8-3c2c8048adba | 19 | 41973428  | 41975116  | 12 | 1688  | 3  | 2  | 7  | NA | NA | NA |
| Eso-AdenoCa    | 384ef419-ee94-4563-9237-236fddeb4b64 | 9  | 15196835  | 15197362  | 7  | 527   | NA | 7  | NA | NA | NA | NA |
| Panc-AdenoCA   | 3933c60d-73d6-4f74-ae02-fd545fc1f092 | 2  | 72879284  | 72879583  | 7  | 299   | NA | 4  | 2  | NA | NA | 1  |
| Panc-AdenoCA   | 3933c60d-73d6-4f74-ae02-fd545fc1f092 | 2  | 147224673 | 147225421 | 12 | 748   | 4  | 5  | 3  | NA | NA | NA |
| Panc-AdenoCA   | 3933c60d-73d6-4f74-ae02-fd545fc1f092 | 8  | 41425446  | 41427182  | 19 | 1736  | 5  | 4  | 10 | NA | NA | NA |
| Panc-AdenoCA   | 3933c60d-73d6-4f74-ae02-fd545fc1f092 | 8  | 55101581  | 55102794  | 17 | 1213  | 6  | 5  | 6  | NA | NA | NA |
| Panc-AdenoCA   | 3933c60d-73d6-4f74-ae02-fd545fc1f092 | 8  | 124814994 | 124817261 | 16 | 2267  | 3  | 8  | 5  | NA | NA | NA |
| Panc-AdenoCA   | 3933c60d-73d6-4f74-ae02-fd545fc1f092 | 11 | 30959794  | 30963849  | 9  | 4055  | 3  | 6  | NA | NA | NA | NA |
| Panc-AdenoCA   | 3933c60d-73d6-4f74-ae02-fd545fc1f092 | 12 | 25007354  | 25008813  | 9  | 1459  | 2  | NA | 5  | 1  | NA | 1  |
| Panc-AdenoCA   | 3933c60d-73d6-4f74-ae02-fd545fc1f092 | 19 | 45950243  | 45952673  | 8  | 2430  | 3  | NA | 4  | NA | NA | 1  |
| Panc-AdenoCA   | 3933c60d-73d6-4f74-ae02-fd545fc1f092 | X  | 126764662 | 126765014 | 7  | 352   | 1  | 3  | 3  | NA | NA | NA |
| CNS-GBM        | 39520be3-a2af-4189-acf4-9d239363333a | 3  | 184781891 | 184786318 | 6  | 4427  | NA | 4  | 2  | NA | NA | NA |
| CNS-GBM        | 39520be3-a2af-4189-acf4-9d239363333a | 9  | 129997711 | 129998460 | 6  | 749   | NA | 4  | 2  | NA | NA | NA |
| Prost-AdenoCA  | 39aee9fc-fa27-4b71-b9e8-43ff34bd3930 | 8  | 37842377  | 37846469  | 7  | 4092  | 2  | 3  | 2  | NA | NA | NA |
| Prost-AdenoCA  | 39aee9fc-fa27-4b71-b9e8-43ff34bd3930 | 8  | 38154105  | 38155871  | 9  | 1766  | NA | 6  | 3  | NA | NA | NA |
| Panc-AdenoCA   | 39c6c3b3-4683-4d11-984c-ed589188da65 | 1  | 101125725 | 101128375 | 12 | 2650  | NA | 6  | 6  | NA | NA | NA |
| Panc-AdenoCA   | 39c6c3b3-4683-4d11-984c-ed589188da65 | 9  | 9954201   | 9955143   | 7  | 942   | NA | 5  | 2  | NA | NA | NA |
| Panc-AdenoCA   | 39c6c3b3-4683-4d11-984c-ed589188da65 | 12 | 44766693  | 44772378  | 13 | 5685  | 1  | 4  | 7  | NA | 1  | NA |
| Panc-AdenoCA   | 39c6c3b3-4683-4d11-984c-ed589188da65 | 12 | 49443217  | 49447724  | 15 | 4507  | 2  | 4  | 9  | NA | NA | NA |
| Panc-AdenoCA   | 39c6c3b3-4683-4d11-984c-ed589188da65 | 12 | 60189434  | 60192886  | 9  | 3452  | 4  | NA | 4  | 1  | NA | NA |
| Panc-AdenoCA   | 39c6c3b3-4683-4d11-984c-ed589188da65 | 15 | 45794289  | 45795168  | 7  | 879   | 1  | 1  | 5  | NA | NA | NA |
| Panc-AdenoCA   | 39c6c3b3-4683-4d11-984c-ed589188da65 | 15 | 46575171  | 46586540  | 45 | 11369 | 6  | 12 | 27 | NA | NA | NA |
| Panc-AdenoCA   | 39c6c3b3-4683-4d11-984c-ed589188da65 | 15 | 85423900  | 85427406  | 8  | 3506  | NA | 2  | 6  | NA | NA | NA |
| Panc-AdenoCA   | 39c6c3b3-4683-4d11-984c-ed589188da65 | 17 | 16789759  | 16790168  | 9  | 409   | 3  | 1  | 5  | NA | NA | NA |
| Panc-AdenoCA   | 39c6c3b3-4683-4d11-984c-ed589188da65 | 17 | 25431928  | 25434343  | 20 | 2415  | 2  | 5  | 13 | NA | NA | NA |
| Panc-AdenoCA   | 39c6c3b3-4683-4d11-984c-ed589188da65 | 17 | 72523752  | 72524973  | 7  | 1221  | NA | NA | 7  | NA | NA | NA |
| Panc-AdenoCA   | 39c6c3b3-4683-4d11-984c-ed589188da65 | 18 | 19017457  | 19020993  | 11 | 3536  | 4  | 3  | 3  | NA | NA | 1  |
| Panc-AdenoCA   | 39c6c3b3-4683-4d11-984c-ed589188da65 | 19 | 21038053  | 21038098  | 22 | 45    | 6  | NA | 3  | 7  | 3  | 3  |
| Panc-AdenoCA   | 39d38c06-3779-4ca4-b103-1d096f93dae8 | 3  | 90173801  | 90174725  | 8  | 924   | NA | 3  | 5  | NA | NA | NA |
| Panc-AdenoCA   | 39d38c06-3779-4ca4-b103-1d096f93dae8 | 3  | 90247584  | 90250806  | 24 | 3222  | 1  | 10 | 13 | NA | NA | NA |
| Panc-AdenoCA   | 39d38c06-3779-4ca4-b103-1d096f93dae8 | 4  | 161920528 | 161925557 | 16 | 5029  | NA | 1  | 12 | NA | 3  | NA |
| Panc-AdenoCA   | 39d38c06-3779-4ca4-b103-1d096f93dae8 | 6  | 20777072  | 20777604  | 13 | 532   | 3  | NA | 10 | NA | NA | NA |
| Panc-AdenoCA   | 39d38c06-3779-4ca4-b103-1d096f93dae8 | 6  | 33164675  | 33167489  | 16 | 2814  | 1  | 3  | 12 | NA | NA | NA |
| Panc-AdenoCA   | 39d38c06-3779-4ca4-b103-1d096f93dae8 | 6  | 84638526  | 84644511  | 16 | 5985  | NA | 12 | 4  | NA | NA | NA |
| Panc-AdenoCA   | 39d38c06-3779-4ca4-b103-1d096f93dae8 | 19 | 57687806  | 57689396  | 14 | 1590  | NA | 6  | 8  | NA | NA | NA |
| Panc-AdenoCA   | 39d38c06-3779-4ca4-b103-1d096f93dae8 | X  | 67518438  | 67520015  | 12 | 1577  | 2  | 4  | 6  | NA | NA | NA |

|                  |                                      |    |           |           |    |       |    |    |    |    |    |    |
|------------------|--------------------------------------|----|-----------|-----------|----|-------|----|----|----|----|----|----|
| Eso-AdenoCa      | 3a18aa52-b6e2-4d03-ad05-ef99d653f0e0 | 17 | 33052210  | 33055415  | 6  | 3205  | 2  | 1  | 2  | NA | NA | 1  |
| Eso-AdenoCa      | 3a551616-4840-4111-a8c5-b4aa773d82c2 | 6  | 94989855  | 94990991  | 7  | 1136  | 2  | 2  | 3  | NA | NA | NA |
| Eso-AdenoCa      | 3a551616-4840-4111-a8c5-b4aa773d82c2 | 9  | 18407505  | 18409291  | 7  | 1786  | NA | 4  | 3  | NA | NA | NA |
| Eso-AdenoCa      | 3a551616-4840-4111-a8c5-b4aa773d82c2 | 9  | 27100887  | 27101739  | 21 | 852   | 5  | 7  | 9  | NA | NA | NA |
| Eso-AdenoCa      | 3a551616-4840-4111-a8c5-b4aa773d82c2 | 9  | 30113938  | 30115166  | 8  | 1228  | 1  | 1  | 5  | NA | NA | 1  |
| Eso-AdenoCa      | 3a551616-4840-4111-a8c5-b4aa773d82c2 | 9  | 81385317  | 81386269  | 11 | 952   | 3  | 1  | 7  | NA | NA | NA |
| Eso-AdenoCa      | 3a551616-4840-4111-a8c5-b4aa773d82c2 | 9  | 86660315  | 86661234  | 7  | 919   | NA | 5  | 2  | NA | NA | NA |
| Eso-AdenoCa      | 3a551616-4840-4111-a8c5-b4aa773d82c2 | 9  | 93493470  | 93494200  | 7  | 730   | 3  | NA | 4  | NA | NA | NA |
| Eso-AdenoCa      | 3a551616-4840-4111-a8c5-b4aa773d82c2 | 9  | 99566586  | 99567527  | 10 | 941   | 1  | 8  | 1  | NA | NA | NA |
| Eso-AdenoCa      | 3a551616-4840-4111-a8c5-b4aa773d82c2 | 9  | 117834870 | 117835443 | 19 | 573   | 3  | 2  | 14 | NA | NA | NA |
| Eso-AdenoCa      | 3a551616-4840-4111-a8c5-b4aa773d82c2 | 9  | 122507896 | 122509203 | 9  | 1307  | NA | 2  | 6  | NA | NA | 1  |
| Eso-AdenoCa      | 3a551616-4840-4111-a8c5-b4aa773d82c2 | 9  | 138753266 | 138755047 | 21 | 1781  | 4  | 7  | 9  | NA | NA | 1  |
| Eso-AdenoCa      | 3a551616-4840-4111-a8c5-b4aa773d82c2 | 17 | 38995553  | 38999498  | 9  | 3945  | 2  | NA | 7  | NA | NA | NA |
| Ovary-AdenoCA    | 3a5eaed6-fcfd-437a-b61c-fd3725c64717 | 1  | 233451223 | 233455725 | 17 | 4502  | 2  | 6  | 9  | NA | NA | NA |
| Ovary-AdenoCA    | 3a5eaed6-fcfd-437a-b61c-fd3725c64717 | 3  | 180734928 | 180738542 | 10 | 3614  | 1  | 4  | 5  | NA | NA | NA |
| Ovary-AdenoCA    | 3a5eaed6-fcfd-437a-b61c-fd3725c64717 | 8  | 65401046  | 65403705  | 13 | 2659  | NA | 4  | 9  | NA | NA | NA |
| Ovary-AdenoCA    | 3a6bce45-0431-49d8-82df-b1d9a738e5a6 | 8  | 136197115 | 136201634 | 17 | 4519  | 2  | 2  | 13 | NA | NA | NA |
| Ovary-AdenoCA    | 3a6bce45-0431-49d8-82df-b1d9a738e5a6 | 8  | 138309670 | 138313285 | 10 | 3615  | 1  | 3  | 5  | NA | NA | 1  |
| Ovary-AdenoCA    | 3a6bce45-0431-49d8-82df-b1d9a738e5a6 | 8  | 141412242 | 141413690 | 17 | 1448  | 5  | 4  | 8  | NA | NA | NA |
| Ovary-AdenoCA    | 3a6bce45-0431-49d8-82df-b1d9a738e5a6 | 18 | 4581924   | 4582348   | 9  | 424   | NA | 3  | 5  | NA | NA | 1  |
| Kidney-RCC       | 3afb3f57-545a-4ed5-9461-2fcb28d89399 | 1  | 113015362 | 113016430 | 8  | 1068  | NA | 4  | 4  | NA | NA | NA |
| Kidney-RCC       | 3afb3f57-545a-4ed5-9461-2fcb28d89399 | 1  | 211733412 | 211735003 | 16 | 1591  | 1  | NA | 15 | NA | NA | NA |
| Kidney-RCC       | 3afb3f57-545a-4ed5-9461-2fcb28d89399 | 3  | 154392515 | 154396789 | 8  | 4274  | NA | 2  | 6  | NA | NA | NA |
| Kidney-RCC       | 3afb3f57-545a-4ed5-9461-2fcb28d89399 | 4  | 23638772  | 23639252  | 8  | 480   | NA | NA | 8  | NA | NA | NA |
| Kidney-RCC       | 3afb3f57-545a-4ed5-9461-2fcb28d89399 | 4  | 24171435  | 24174036  | 10 | 2601  | NA | NA | 10 | NA | NA | NA |
| Kidney-RCC       | 3afb3f57-545a-4ed5-9461-2fcb28d89399 | 7  | 75688136  | 75689019  | 6  | 883   | NA | 2  | 4  | NA | NA | NA |
| Panc-AdenoCA     | 3b526846-72d6-4e10-b7cd-8cdb45a92a1c | 2  | 127649858 | 127654254 | 12 | 4396  | 3  | 1  | 7  | NA | 1  | NA |
| Panc-AdenoCA     | 3b526846-72d6-4e10-b7cd-8cdb45a92a1c | 2  | 140755226 | 140761678 | 10 | 6452  | NA | 2  | 8  | NA | NA | NA |
| Panc-AdenoCA     | 3b526846-72d6-4e10-b7cd-8cdb45a92a1c | 10 | 131077631 | 131077812 | 8  | 181   | NA | 2  | 6  | NA | NA | NA |
| Panc-AdenoCA     | 3b526846-72d6-4e10-b7cd-8cdb45a92a1c | 21 | 35223928  | 35225858  | 16 | 1930  | NA | 3  | 13 | NA | NA | NA |
| Lymph-BNHL       | 3b55c58d-f95a-4a1d-9aa1-8d2c026656a9 | 2  | 89158851  | 89160391  | 49 | 1540  | NA | 2  | 5  | 16 | 12 | 14 |
| Lymph-BNHL       | 3b55c58d-f95a-4a1d-9aa1-8d2c026656a9 | 3  | 2219929   | 2225533   | 9  | 5604  | NA | 1  | 4  | 3  | NA | 1  |
| Lymph-BNHL       | 3b55c58d-f95a-4a1d-9aa1-8d2c026656a9 | 9  | 106684473 | 106702824 | 21 | 18351 | NA | NA | 4  | 7  | 2  | 8  |
| Lymph-BNHL       | 3b55c58d-f95a-4a1d-9aa1-8d2c026656a9 | 14 | 106325693 | 106329864 | 67 | 4171  | 4  | 15 | 15 | 13 | 9  | 11 |
| Lymph-BNHL       | 3b55c58d-f95a-4a1d-9aa1-8d2c026656a9 | 14 | 106994186 | 106994767 | 16 | 581   | 1  | 1  | 3  | 6  | 2  | 3  |
| Lymph-BNHL       | 3b55c58d-f95a-4a1d-9aa1-8d2c026656a9 | 18 | 60984081  | 60988383  | 61 | 4302  | 7  | 7  | 12 | 13 | 6  | 16 |
| Kidney-RCC       | 3b7810f7-f8ff-4d62-b766-3ba06170194c | 6  | 168590839 | 168590897 | 7  | 58    | 2  | NA | 2  | NA | NA | 3  |
| Liver-HCC        | 3bacc189-01b8-46cc-a442-f393c0f428c6 | 11 | 58319281  | 58324439  | 9  | 5158  | 2  | 4  | 3  | NA | NA | NA |
| Eso-AdenoCa      | 3bb4c27b-4d0d-4d13-b910-41a9ebf95880 | 1  | 31998769  | 32001687  | 15 | 2918  | NA | NA | 1  | 14 | NA | NA |
| Eso-AdenoCa      | 3bb4c27b-4d0d-4d13-b910-41a9ebf95880 | 11 | 77836890  | 77839063  | 9  | 2173  | 2  | 1  | 6  | NA | NA | NA |
| Eso-AdenoCa      | 3bb4c27b-4d0d-4d13-b910-41a9ebf95880 | 16 | 83462229  | 83483549  | 26 | 21320 | 13 | 5  | 6  | NA | 1  | 1  |
| Panc-AdenoCA     | 3bfbc33d-804b-4bb3-97ac-97563d77b13d | 5  | 179695259 | 179697746 | 10 | 2487  | NA | 6  | 4  | NA | NA | NA |
| Panc-AdenoCA     | 3bfbc33d-804b-4bb3-97ac-97563d77b13d | 8  | 41151766  | 41152229  | 6  | 463   | NA | 3  | 2  | NA | NA | 1  |
| Panc-AdenoCA     | 3bfbc33d-804b-4bb3-97ac-97563d77b13d | 10 | 27128906  | 27131105  | 18 | 2199  | 1  | 8  | 9  | NA | NA | NA |
| Panc-AdenoCA     | 3bfbc33d-804b-4bb3-97ac-97563d77b13d | 15 | 96560684  | 96572484  | 31 | 11800 | 1  | 16 | 13 | NA | NA | 1  |
| Panc-AdenoCA     | 3bfbc33d-804b-4bb3-97ac-97563d77b13d | 20 | 38803183  | 38808238  | 13 | 5055  | 6  | 3  | 4  | NA | NA | NA |
| Panc-AdenoCA     | 3bfbc33d-804b-4bb3-97ac-97563d77b13d | X  | 126007927 | 126008299 | 11 | 372   | 1  | NA | 10 | NA | NA | NA |
| Panc-AdenoCA     | 3bfbc33d-804b-4bb3-97ac-97563d77b13d | X  | 126181160 | 126186268 | 7  | 5108  | NA | 4  | 3  | NA | NA | NA |
| Panc-AdenoCA     | 3bfbc33d-804b-4bb3-97ac-97563d77b13d | X  | 150910768 | 150912682 | 16 | 1914  | NA | 8  | 6  | NA | 1  | 1  |
| ColoRect-AdenoCA | 3c019b2f-52ec-40a8-99b5-98c1423c6e27 | 19 | 42723129  | 42724191  | 9  | 1062  | 4  | 2  | 3  | NA | NA | NA |
| Ovary-AdenoCA    | 3c2b1509-1eb9-4b79-9569-57810f291499 | 6  | 1616366   | 1618960   | 6  | 2594  | 1  | 3  | 2  | NA | NA | NA |
| Ovary-AdenoCA    | 3c2b1509-1eb9-4b79-9569-57810f291499 | 6  | 2344203   | 2348645   | 10 | 4442  | 2  | NA | 7  | 1  | NA | NA |
| Ovary-AdenoCA    | 3c2b1509-1eb9-4b79-9569-57810f291499 | 6  | 4864959   | 4869257   | 11 | 4298  | NA | 5  | 6  | NA | NA | NA |
| Ovary-AdenoCA    | 3c2b1509-1eb9-4b79-9569-57810f291499 | 6  | 6303554   | 6309763   | 12 | 6209  | NA | 7  | 5  | NA | NA | NA |
| Ovary-AdenoCA    | 3c2b1509-1eb9-4b79-9569-57810f291499 | 6  | 6399490   | 6408726   | 12 | 9236  | 1  | 3  | 7  | 1  | NA | NA |
| Ovary-AdenoCA    | 3c2b1509-1eb9-4b79-9569-57810f291499 | 6  | 16112621  | 16116065  | 22 | 3444  | 2  | 13 | 7  | NA | NA | NA |
| Ovary-AdenoCA    | 3c2b1509-1eb9-4b79-9569-57810f291499 | 6  | 16935721  | 16943642  | 15 | 7921  | 1  | 8  | 5  | NA | NA | 1  |
| Ovary-AdenoCA    | 3c2b1509-1eb9-4b79-9569-57810f291499 | 6  | 19527068  | 19528471  | 8  | 1403  | NA | 5  | 3  | NA | NA | NA |
| Ovary-AdenoCA    | 3c2b1509-1eb9-4b79-9569-57810f291499 | 6  | 20257687  | 20260135  | 9  | 2448  | 1  | 4  | 4  | NA | NA | NA |
| Ovary-AdenoCA    | 3c2b1509-1eb9-4b79-9569-57810f291499 | 6  | 20596736  | 20604106  | 18 | 7370  | NA | 8  | 10 | NA | NA | NA |

|                 |                                      |    |           |           |     |       |    |    |    |    |    |    |
|-----------------|--------------------------------------|----|-----------|-----------|-----|-------|----|----|----|----|----|----|
| Ovary-AdenoCA   | 3c2b1509-1eb9-4b79-9569-57810f291499 | 6  | 22500126  | 22511210  | 19  | 11084 | 2  | 4  | 13 | NA | NA | NA |
| Panc-AdenoCA    | 3c86ba21-7b11-4ec7-9d20-a2325197c676 | 1  | 204475778 | 204476175 | 7   | 397   | NA | 2  | 5  | NA | NA | NA |
| Panc-AdenoCA    | 3c86ba21-7b11-4ec7-9d20-a2325197c676 | 10 | 77686995  | 77693160  | 8   | 6165  | NA | 2  | 5  | NA | NA | 1  |
| Panc-AdenoCA    | 3c86ba21-7b11-4ec7-9d20-a2325197c676 | 11 | 18426525  | 18426874  | 7   | 349   | 5  | NA | 2  | NA | NA | NA |
| Panc-AdenoCA    | 3c86ba21-7b11-4ec7-9d20-a2325197c676 | 11 | 80100959  | 80101119  | 7   | 160   | 1  | 2  | 4  | NA | NA | NA |
| Panc-AdenoCA    | 3c86ba21-7b11-4ec7-9d20-a2325197c676 | 11 | 80571146  | 80574178  | 14  | 3032  | NA | 4  | 10 | NA | NA | NA |
| Panc-AdenoCA    | 3c86ba21-7b11-4ec7-9d20-a2325197c676 | 12 | 38354791  | 38355395  | 6   | 604   | NA | NA | 6  | NA | NA | NA |
| Panc-AdenoCA    | 3c86ba21-7b11-4ec7-9d20-a2325197c676 | 19 | 38403287  | 38404047  | 7   | 760   | 1  | 2  | 4  | NA | NA | NA |
| Bone-Leiomyo    | 3c963890-6e79-4b16-a4aa-bac04938b4d7 | 4  | 133562268 | 133563060 | 6   | 792   | 2  | 1  | 3  | NA | NA | NA |
| Bone-Leiomyo    | 3c963890-6e79-4b16-a4aa-bac04938b4d7 | 5  | 101645079 | 101646560 | 6   | 1481  | 3  | NA | 3  | NA | NA | NA |
| Bone-Leiomyo    | 3c963890-6e79-4b16-a4aa-bac04938b4d7 | 5  | 131924739 | 131933288 | 13  | 8549  | 2  | 3  | 8  | NA | NA | NA |
| Bone-Leiomyo    | 3c963890-6e79-4b16-a4aa-bac04938b4d7 | 6  | 135076815 | 135079316 | 6   | 2501  | 1  | 1  | 3  | NA | NA | 1  |
| Bone-Leiomyo    | 3c963890-6e79-4b16-a4aa-bac04938b4d7 | 6  | 135942556 | 135944420 | 7   | 1864  | 1  | 3  | 3  | NA | NA | NA |
| Bone-Leiomyo    | 3c963890-6e79-4b16-a4aa-bac04938b4d7 | 9  | 26603196  | 26605290  | 6   | 2094  | 2  | NA | 3  | NA | NA | 1  |
| Bone-Leiomyo    | 3c963890-6e79-4b16-a4aa-bac04938b4d7 | 11 | 59743273  | 59744325  | 6   | 1052  | 1  | 5  | NA | NA | NA | NA |
| Bone-Leiomyo    | 3c963890-6e79-4b16-a4aa-bac04938b4d7 | 12 | 29144472  | 29146048  | 6   | 1576  | 3  | 3  | NA | NA | NA | NA |
| Bone-Leiomyo    | 3c963890-6e79-4b16-a4aa-bac04938b4d7 | 12 | 69706335  | 69707940  | 8   | 1605  | 3  | 1  | 4  | NA | NA | NA |
| Bone-Leiomyo    | 3c963890-6e79-4b16-a4aa-bac04938b4d7 | 12 | 71303087  | 71303873  | 7   | 786   | 1  | 2  | 4  | NA | NA | NA |
| Bone-Leiomyo    | 3c963890-6e79-4b16-a4aa-bac04938b4d7 | 12 | 71518667  | 71520240  | 7   | 1573  | 1  | 2  | 4  | NA | NA | NA |
| Bone-Leiomyo    | 3c963890-6e79-4b16-a4aa-bac04938b4d7 | 12 | 74079845  | 74082633  | 11  | 2788  | 2  | 5  | 4  | NA | NA | NA |
| Bone-Leiomyo    | 3c963890-6e79-4b16-a4aa-bac04938b4d7 | 12 | 74856310  | 74857859  | 7   | 1549  | 1  | 2  | 4  | NA | NA | NA |
| Bone-Leiomyo    | 3c963890-6e79-4b16-a4aa-bac04938b4d7 | 12 | 77187514  | 77190013  | 9   | 2499  | NA | 7  | 2  | NA | NA | NA |
| Bone-Leiomyo    | 3c963890-6e79-4b16-a4aa-bac04938b4d7 | 12 | 78513218  | 78518566  | 15  | 5348  | NA | 7  | 8  | NA | NA | NA |
| Bone-Leiomyo    | 3c963890-6e79-4b16-a4aa-bac04938b4d7 | 12 | 83456099  | 83459012  | 15  | 2913  | 3  | 8  | 4  | NA | NA | NA |
| Bone-Leiomyo    | 3c963890-6e79-4b16-a4aa-bac04938b4d7 | 12 | 98487641  | 98492135  | 12  | 4494  | 2  | 6  | 4  | NA | NA | NA |
| Bone-Leiomyo    | 3c963890-6e79-4b16-a4aa-bac04938b4d7 | 12 | 110755708 | 110759325 | 7   | 3617  | 2  | 1  | 4  | NA | NA | NA |
| Bone-Leiomyo    | 3c963890-6e79-4b16-a4aa-bac04938b4d7 | 12 | 113458688 | 113461631 | 8   | 2943  | 1  | 4  | 3  | NA | NA | NA |
| Bone-Leiomyo    | 3c963890-6e79-4b16-a4aa-bac04938b4d7 | 18 | 44632104  | 44632259  | 6   | 155   | NA | 1  | 5  | NA | NA | NA |
| Eso-AdenoCa     | 3da169e8-844a-4eee-b794-a2eb81db779a | 4  | 121630038 | 121630280 | 10  | 242   | 1  | 9  | NA | NA | NA | NA |
| Eso-AdenoCa     | 3da169e8-844a-4eee-b794-a2eb81db779a | 18 | 30889999  | 30893373  | 8   | 3374  | NA | 3  | 5  | NA | NA | NA |
| Stomach-AdenoCA | 3db3b7b1-da1d-4b9c-a92a-c60fecf4328c | 13 | 89211214  | 89212549  | 6   | 1335  | NA | 4  | 2  | NA | NA | NA |
| Stomach-AdenoCA | 3db3b7b1-da1d-4b9c-a92a-c60fecf4328c | 16 | 26345174  | 26345484  | 7   | 310   | 1  | 2  | 4  | NA | NA | NA |
| Stomach-AdenoCA | 3db3b7b1-da1d-4b9c-a92a-c60fecf4328c | 19 | 11740238  | 11744429  | 6   | 4191  | NA | 2  | 4  | NA | NA | NA |
| Stomach-AdenoCA | 3db3b7b1-da1d-4b9c-a92a-c60fecf4328c | 19 | 30467290  | 30473207  | 25  | 5917  | 1  | 7  | 15 | NA | 1  | 1  |
| Stomach-AdenoCA | 3db3b7b1-da1d-4b9c-a92a-c60fecf4328c | 19 | 47443910  | 47449902  | 32  | 5992  | 6  | 11 | 15 | NA | NA | NA |
| Stomach-AdenoCA | 3db3b7b1-da1d-4b9c-a92a-c60fecf4328c | X  | 62516049  | 62517222  | 9   | 1173  | NA | 8  | 1  | NA | NA | NA |
| Lymph-BNHL      | 3e012b50-06d1-4120-971b-5e54139b00ee | 1  | 198714040 | 198716117 | 7   | 2077  | NA | NA | NA | NA | 3  | 4  |
| Lymph-BNHL      | 3e012b50-06d1-4120-971b-5e54139b00ee | 1  | 217017619 | 217025775 | 11  | 8156  | 3  | NA | NA | 3  | 2  | 3  |
| Lymph-BNHL      | 3e012b50-06d1-4120-971b-5e54139b00ee | 2  | 24945043  | 24945148  | 9   | 105   | NA | 1  | 8  | NA | NA | NA |
| Lymph-BNHL      | 3e012b50-06d1-4120-971b-5e54139b00ee | 2  | 88905813  | 88910425  | 11  | 4612  | 2  | 2  | 3  | 1  | 1  | 2  |
| Lymph-BNHL      | 3e012b50-06d1-4120-971b-5e54139b00ee | 2  | 89127507  | 89159779  | 131 | 32272 | 4  | 18 | 36 | 32 | 21 | 20 |
| Lymph-BNHL      | 3e012b50-06d1-4120-971b-5e54139b00ee | 2  | 136873922 | 136876061 | 7   | 2139  | NA | NA | 6  | NA | NA | 1  |
| Lymph-BNHL      | 3e012b50-06d1-4120-971b-5e54139b00ee | 3  | 6713584   | 6719332   | 7   | 5748  | 1  | NA | 1  | NA | 2  | 3  |
| Lymph-BNHL      | 3e012b50-06d1-4120-971b-5e54139b00ee | 3  | 186711794 | 186715169 | 8   | 3375  | NA | 1  | 3  | 2  | 2  | NA |
| Lymph-BNHL      | 3e012b50-06d1-4120-971b-5e54139b00ee | 3  | 186782447 | 186788674 | 10  | 6227  | NA | NA | 6  | 3  | 1  | NA |
| Lymph-BNHL      | 3e012b50-06d1-4120-971b-5e54139b00ee | 3  | 187461767 | 187474551 | 72  | 12784 | 4  | 9  | 27 | 18 | 6  | 8  |
| Lymph-BNHL      | 3e012b50-06d1-4120-971b-5e54139b00ee | 3  | 187957353 | 187961527 | 32  | 4174  | 1  | 7  | 6  | 10 | 2  | 6  |
| Lymph-BNHL      | 3e012b50-06d1-4120-971b-5e54139b00ee | 3  | 188298958 | 188299476 | 9   | 518   | 1  | 3  | 4  | 1  | NA | NA |
| Lymph-BNHL      | 3e012b50-06d1-4120-971b-5e54139b00ee | 3  | 188469814 | 188471938 | 15  | 2124  | NA | 2  | 6  | 3  | 2  | 2  |
| Lymph-BNHL      | 3e012b50-06d1-4120-971b-5e54139b00ee | 4  | 25863890  | 25865500  | 6   | 1610  | NA | 1  | 2  | NA | 2  | 1  |
| Lymph-BNHL      | 3e012b50-06d1-4120-971b-5e54139b00ee | 4  | 30129157  | 30133598  | 7   | 4441  | NA | NA | 3  | 2  | NA | 2  |
| Lymph-BNHL      | 3e012b50-06d1-4120-971b-5e54139b00ee | 4  | 63326109  | 63328420  | 7   | 2311  | NA | NA | 2  | 1  | 1  | 3  |
| Lymph-BNHL      | 3e012b50-06d1-4120-971b-5e54139b00ee | 4  | 153242204 | 153245911 | 8   | 3707  | NA | 6  | 2  | NA | NA | NA |
| Lymph-BNHL      | 3e012b50-06d1-4120-971b-5e54139b00ee | 5  | 100618856 | 100624397 | 7   | 5541  | NA | 1  | NA | 2  | 2  | 2  |
| Lymph-BNHL      | 3e012b50-06d1-4120-971b-5e54139b00ee | 5  | 167006080 | 167011958 | 7   | 5878  | 1  | NA | 2  | 1  | NA | 3  |
| Lymph-BNHL      | 3e012b50-06d1-4120-971b-5e54139b00ee | 6  | 31548692  | 31550099  | 19  | 1407  | 3  | 1  | 12 | 1  | 2  | NA |
| Lymph-BNHL      | 3e012b50-06d1-4120-971b-5e54139b00ee | 6  | 89338361  | 89348829  | 18  | 10468 | NA | 5  | 2  | 3  | 2  | 6  |
| Lymph-BNHL      | 3e012b50-06d1-4120-971b-5e54139b00ee | 7  | 73981716  | 73985005  | 6   | 3289  | 1  | 2  | 2  | 1  | NA | NA |
| Lymph-BNHL      | 3e012b50-06d1-4120-971b-5e54139b00ee | 9  | 37002538  | 37005072  | 6   | 2534  | NA | NA | 2  | NA | 1  | 3  |
| Lymph-BNHL      | 3e012b50-06d1-4120-971b-5e54139b00ee | 9  | 37024052  | 37027330  | 7   | 3278  | 1  | 4  | 2  | NA | NA | NA |

|               |                                      |    |           |           |     |       |    |    |    |    |    |    |
|---------------|--------------------------------------|----|-----------|-----------|-----|-------|----|----|----|----|----|----|
| Lymph-BNHL    | 3e012b50-06d1-4120-971b-5e54139b00ee | 9  | 37369269  | 37371818  | 11  | 2549  | NA | 3  | 6  | 1  | 1  | NA |
| Lymph-BNHL    | 3e012b50-06d1-4120-971b-5e54139b00ee | 9  | 37399678  | 37401368  | 7   | 1690  | NA | 1  | 6  | NA | NA | NA |
| Lymph-BNHL    | 3e012b50-06d1-4120-971b-5e54139b00ee | 11 | 81571664  | 81575532  | 8   | 3868  | NA | NA | 1  | 6  | 1  | NA |
| Lymph-BNHL    | 3e012b50-06d1-4120-971b-5e54139b00ee | 12 | 122457636 | 122465630 | 33  | 7994  | 1  | 4  | 20 | 4  | 2  | 2  |
| Lymph-BNHL    | 3e012b50-06d1-4120-971b-5e54139b00ee | 13 | 74600780  | 74604275  | 6   | 3495  | 1  | NA | NA | 2  | 1  | 2  |
| Lymph-BNHL    | 3e012b50-06d1-4120-971b-5e54139b00ee | 14 | 69257343  | 69262502  | 11  | 5159  | NA | 2  | 7  | 1  | 1  | NA |
| Lymph-BNHL    | 3e012b50-06d1-4120-971b-5e54139b00ee | 14 | 106048790 | 106055141 | 13  | 6351  | 2  | 3  | 7  | 1  | NA | NA |
| Lymph-BNHL    | 3e012b50-06d1-4120-971b-5e54139b00ee | 14 | 106213738 | 106214681 | 8   | 943   | 1  | 1  | 5  | NA | NA | 1  |
| Lymph-BNHL    | 3e012b50-06d1-4120-971b-5e54139b00ee | 14 | 106326843 | 106493674 | 170 | 2E+05 | 13 | 27 | 70 | 27 | 17 | 16 |
| Lymph-BNHL    | 3e012b50-06d1-4120-971b-5e54139b00ee | 14 | 107176215 | 107179707 | 11  | 3492  | 1  | 1  | 4  | 3  | 1  | 1  |
| Lymph-BNHL    | 3e012b50-06d1-4120-971b-5e54139b00ee | 15 | 86245026  | 86247887  | 10  | 2861  | NA | 2  | 1  | 2  | 2  | 3  |
| Lymph-BNHL    | 3e012b50-06d1-4120-971b-5e54139b00ee | 16 | 10971979  | 10982892  | 17  | 10913 | 2  | 1  | 14 | NA | NA | NA |
| Lymph-BNHL    | 3e012b50-06d1-4120-971b-5e54139b00ee | 16 | 11349018  | 11349826  | 8   | 808   | NA | 3  | 5  | NA | NA | NA |
| Lymph-BNHL    | 3e012b50-06d1-4120-971b-5e54139b00ee | 16 | 46651758  | 46654989  | 8   | 3231  | NA | 1  | 5  | 2  | NA | NA |
| Lymph-BNHL    | 3e012b50-06d1-4120-971b-5e54139b00ee | 16 | 85932116  | 85945811  | 31  | 13695 | 2  | 3  | 17 | 6  | 1  | 2  |
| Lymph-BNHL    | 3e012b50-06d1-4120-971b-5e54139b00ee | 17 | 56408630  | 56409751  | 9   | 1121  | NA | NA | 8  | 1  | NA | NA |
| Lymph-BNHL    | 3e012b50-06d1-4120-971b-5e54139b00ee | 19 | 10304652  | 10309047  | 8   | 4395  | 1  | 3  | 3  | 1  | NA | NA |
| Lymph-BNHL    | 3e012b50-06d1-4120-971b-5e54139b00ee | 21 | 36525548  | 36528984  | 7   | 3436  | NA | NA | NA | 5  | NA | 2  |
| Lymph-BNHL    | 3e012b50-06d1-4120-971b-5e54139b00ee | 22 | 23154422  | 23155710  | 6   | 1288  | 1  | 1  | 3  | 1  | NA | NA |
| Lymph-BNHL    | 3e012b50-06d1-4120-971b-5e54139b00ee | 22 | 23192439  | 23470664  | 304 | 3E+05 | 14 | 38 | ## | 53 | 36 | 36 |
| Lymph-BNHL    | 3e012b50-06d1-4120-971b-5e54139b00ee | X  | 12993410  | 12996899  | 10  | 3489  | NA | 1  | 6  | 3  | NA | NA |
| Lymph-BNHL    | 3e012b50-06d1-4120-971b-5e54139b00ee | X  | 125614397 | 125619202 | 7   | 4805  | 1  | NA | NA | 2  | 3  | 1  |
| Liver-HCC     | 3e68233a-c623-11e3-bf01-24c6515278c0 | 17 | 55245075  | 55246169  | 15  | 1094  | 1  | 10 | 4  | NA | NA | NA |
| Lymph-BNHL    | 3e7ccab5-5b1d-4147-b907-77cab8f0837e | 2  | 76429550  | 76440621  | 13  | 11071 | NA | 1  | 2  | 5  | 3  | 2  |
| Lymph-BNHL    | 3e7ccab5-5b1d-4147-b907-77cab8f0837e | 6  | 89652364  | 89652510  | 7   | 146   | NA | NA | NA | 4  | 2  | 1  |
| Lymph-BNHL    | 3e7ccab5-5b1d-4147-b907-77cab8f0837e | 7  | 112969852 | 112971465 | 6   | 1613  | 1  | 1  | 1  | 1  | 1  | 1  |
| Lymph-BNHL    | 3e7ccab5-5b1d-4147-b907-77cab8f0837e | 8  | 92486403  | 92488719  | 6   | 2316  | NA | NA | NA | NA | 1  | 5  |
| Lymph-BNHL    | 3e7ccab5-5b1d-4147-b907-77cab8f0837e | 13 | 88415659  | 88416029  | 7   | 370   | 1  | NA | 1  | 2  | 2  | 1  |
| Lymph-BNHL    | 3e7ccab5-5b1d-4147-b907-77cab8f0837e | 14 | 106112754 | 106113459 | 10  | 705   | 1  | 2  | 7  | NA | NA | NA |
| Lymph-BNHL    | 3e7ccab5-5b1d-4147-b907-77cab8f0837e | 14 | 106209069 | 106213827 | 13  | 4758  | 1  | 1  | 8  | NA | 2  | 1  |
| Lymph-BNHL    | 3e7ccab5-5b1d-4147-b907-77cab8f0837e | 14 | 106239637 | 106241718 | 23  | 2081  | 3  | 2  | 17 | 1  | NA | NA |
| Lymph-BNHL    | 3e7ccab5-5b1d-4147-b907-77cab8f0837e | 14 | 106322758 | 106330585 | 102 | 7827  | 7  | 28 | 49 | 6  | 6  | 6  |
| Lymph-BNHL    | 3e7ccab5-5b1d-4147-b907-77cab8f0837e | 14 | 106691933 | 106692417 | 22  | 484   | 1  | 6  | 6  | 2  | 5  | 2  |
| Lymph-BNHL    | 3e7ccab5-5b1d-4147-b907-77cab8f0837e | 18 | 52456090  | 52460681  | 6   | 4591  | NA | 1  | 2  | 3  | NA | NA |
| Lymph-BNHL    | 3e7ccab5-5b1d-4147-b907-77cab8f0837e | 18 | 60984855  | 60988246  | 30  | 3391  | 2  | 7  | 6  | 4  | 6  | 5  |
| Lymph-BNHL    | 3e7ccab5-5b1d-4147-b907-77cab8f0837e | 22 | 23100392  | 23101444  | 6   | 1052  | NA | 1  | 2  | 2  | NA | 1  |
| Lymph-BNHL    | 3e7ccab5-5b1d-4147-b907-77cab8f0837e | X  | 106128686 | 106132321 | 8   | 3635  | NA | NA | 3  | 1  | 2  | 2  |
| Lymph-CLL     | 3e8a2c90-e747-4a22-bc9e-0b062479fec2 | 2  | 89158028  | 89185571  | 117 | 27543 | 6  | 19 | 15 | 41 | 24 | 12 |
| Lymph-CLL     | 3e8a2c90-e747-4a22-bc9e-0b062479fec2 | 14 | 106239146 | 106241640 | 6   | 2494  | NA | NA | 2  | 4  | NA | NA |
| Lymph-CLL     | 3e8a2c90-e747-4a22-bc9e-0b062479fec2 | 14 | 106323872 | 106376431 | 71  | 52559 | 2  | 15 | 20 | 24 | 4  | 6  |
| Lymph-CLL     | 3e8a2c90-e747-4a22-bc9e-0b062479fec2 | 14 | 106641764 | 106642447 | 13  | 683   | 2  | 2  | 7  | 2  | NA | NA |
| Lymph-CLL     | 3e8a2c90-e747-4a22-bc9e-0b062479fec2 | 22 | 23223155  | 23233126  | 25  | 9971  | NA | 5  | 10 | 8  | 2  | NA |
| Lymph-BNHL    | 3e94aa64-7dd3-4d63-a5de-b4050d3dfafa | 2  | 89159067  | 89161014  | 55  | 1947  | NA | 13 | 7  | 18 | 5  | 12 |
| Lymph-BNHL    | 3e94aa64-7dd3-4d63-a5de-b4050d3dfafa | 9  | 37293264  | 37293460  | 6   | 196   | NA | NA | NA | 5  | 1  | NA |
| Lymph-BNHL    | 3e94aa64-7dd3-4d63-a5de-b4050d3dfafa | 14 | 106323193 | 106330394 | 63  | 7201  | NA | 13 | 17 | 16 | 5  | 12 |
| Lymph-BNHL    | 3e94aa64-7dd3-4d63-a5de-b4050d3dfafa | 18 | 60984948  | 60988381  | 12  | 3433  | 1  | 1  | 8  | 1  | 1  | NA |
| Lymph-BNHL    | 3e94aa64-7dd3-4d63-a5de-b4050d3dfafa | 22 | 23222995  | 23232292  | 22  | 9297  | NA | 5  | 10 | 2  | 2  | 3  |
| Skin-Melanoma | 3f98d326-5676-4257-9af8-0a5f5d3c2527 | 8  | 55434628  | 55445826  | 15  | 11198 | 1  | 4  | 10 | NA | NA | NA |
| Skin-Melanoma | 3f98d326-5676-4257-9af8-0a5f5d3c2527 | 9  | 35367392  | 35369014  | 10  | 1622  | 1  | 2  | 7  | NA | NA | NA |
| Skin-Melanoma | 3f98d326-5676-4257-9af8-0a5f5d3c2527 | 11 | 73435845  | 73436972  | 7   | 1127  | 1  | 1  | 5  | NA | NA | NA |
| Skin-Melanoma | 3f98d326-5676-4257-9af8-0a5f5d3c2527 | 11 | 73466034  | 73473378  | 9   | 7344  | NA | 5  | 3  | NA | NA | 1  |
| Skin-Melanoma | 3f98d326-5676-4257-9af8-0a5f5d3c2527 | 11 | 74042660  | 74050487  | 10  | 7827  | 2  | NA | 8  | NA | NA | NA |
| Skin-Melanoma | 3f98d326-5676-4257-9af8-0a5f5d3c2527 | 11 | 79065639  | 79067932  | 8   | 2293  | 3  | 1  | 4  | NA | NA | NA |
| Skin-Melanoma | 3f98d326-5676-4257-9af8-0a5f5d3c2527 | 11 | 86674675  | 86676805  | 7   | 2130  | NA | 3  | 4  | NA | NA | NA |
| Skin-Melanoma | 3f98d326-5676-4257-9af8-0a5f5d3c2527 | 11 | 87297222  | 87299650  | 13  | 2428  | NA | 2  | 11 | NA | NA | NA |
| Skin-Melanoma | 3f98d326-5676-4257-9af8-0a5f5d3c2527 | 11 | 88972144  | 88972583  | 7   | 439   | NA | 3  | 4  | NA | NA | NA |
| Skin-Melanoma | 3f98d326-5676-4257-9af8-0a5f5d3c2527 | 11 | 89020699  | 89022597  | 8   | 1898  | NA | 2  | 6  | NA | NA | NA |
| Skin-Melanoma | 3f98d326-5676-4257-9af8-0a5f5d3c2527 | 11 | 101606209 | 101606994 | 11  | 785   | 3  | 4  | 3  | NA | NA | 1  |
| Skin-Melanoma | 3f98d326-5676-4257-9af8-0a5f5d3c2527 | 15 | 55653475  | 55655660  | 17  | 2185  | 4  | 9  | 4  | NA | NA | NA |
| Skin-Melanoma | 3f98d326-5676-4257-9af8-0a5f5d3c2527 | 18 | 37554282  | 37558198  | 14  | 3916  | 1  | 4  | 8  | NA | 1  | NA |



|                  |                                      |    |           |           |    |       |    |    |    |    |    |    |
|------------------|--------------------------------------|----|-----------|-----------|----|-------|----|----|----|----|----|----|
| Skin-Melanoma    | 3f98d326-5676-4257-9af8-0a5f5d3c2527 | 18 | 42499437  | 42500204  | 9  | 767   | NA | NA | 9  | NA | NA | NA |
| Skin-Melanoma    | 3f98d326-5676-4257-9af8-0a5f5d3c2527 | 18 | 43550740  | 43551667  | 8  | 927   | NA | NA | 8  | NA | NA | NA |
| Skin-Melanoma    | 3f98d326-5676-4257-9af8-0a5f5d3c2527 | 18 | 48060086  | 48061137  | 13 | 1051  | 1  | 1  | 11 | NA | NA | NA |
| Skin-Melanoma    | 3f98d326-5676-4257-9af8-0a5f5d3c2527 | 18 | 54035159  | 54040039  | 7  | 4880  | NA | NA | 6  | NA | 1  | NA |
| Skin-Melanoma    | 3f98d326-5676-4257-9af8-0a5f5d3c2527 | 18 | 59847817  | 59849523  | 8  | 1706  | NA | 1  | 7  | NA | NA | NA |
| Skin-Melanoma    | 3f98d326-5676-4257-9af8-0a5f5d3c2527 | 18 | 64247598  | 64249102  | 9  | 1504  | 1  | NA | 8  | NA | NA | NA |
| ColoRect-AdenoCA | 4019c219-c51e-479f-8a9d-cfa6816ed696 | 17 | 29001055  | 29011948  | 16 | 10893 | 5  | 3  | 7  | 1  | NA | NA |
| Panc-AdenoCA     | 40378b7a-a65d-4510-aaba-a34c4058fac7 | 12 | 52157540  | 52159284  | 7  | 1744  | NA | 3  | 4  | NA | NA | NA |
| Panc-AdenoCA     | 40378b7a-a65d-4510-aaba-a34c4058fac7 | 17 | 45998203  | 46000752  | 11 | 2549  | 1  | 3  | 7  | NA | NA | NA |
| Panc-AdenoCA     | 40378b7a-a65d-4510-aaba-a34c4058fac7 | 19 | 21883160  | 21884337  | 12 | 1177  | 1  | 4  | 7  | NA | NA | NA |
| Liver-HCC        | 41840dc1-5ea2-4f01-a0d4-8b65add641c8 | 5  | 42174992  | 42175444  | 6  | 452   | 1  | 5  | NA | NA | NA | NA |
| CNS-GBM          | 41d50a3c-49fc-4d8a-9c25-bbbcd3a5da6f | 3  | 109466098 | 109472031 | 16 | 5933  | 1  | 13 | 2  | NA | NA | NA |
| CNS-GBM          | 41d50a3c-49fc-4d8a-9c25-bbbcd3a5da6f | 9  | 23970394  | 23972988  | 6  | 2594  | 1  | 2  | 3  | NA | NA | NA |
| CNS-GBM          | 41d50a3c-49fc-4d8a-9c25-bbbcd3a5da6f | 22 | 24038005  | 24045469  | 12 | 7464  | 5  | 3  | 4  | NA | NA | NA |
| CNS-GBM          | 41d50a3c-49fc-4d8a-9c25-bbbcd3a5da6f | 22 | 29130280  | 29131190  | 7  | 910   | NA | 2  | 4  | NA | NA | 1  |
| Lymph-BNHL       | 41dba8d1-8aad-474c-a82b-20b28ab818bd | 1  | 27621122  | 27621331  | 6  | 209   | NA | NA | NA | 3  | 1  | 2  |
| Lymph-BNHL       | 41dba8d1-8aad-474c-a82b-20b28ab818bd | 8  | 113982800 | 113986767 | 6  | 3967  | 2  | NA | NA | 3  | 1  | NA |
| Lymph-BNHL       | 41dba8d1-8aad-474c-a82b-20b28ab818bd | 10 | 76373689  | 76373831  | 6  | 142   | NA | NA | NA | 1  | 3  | 2  |
| Lymph-BNHL       | 41dba8d1-8aad-474c-a82b-20b28ab818bd | 12 | 122459335 | 122462015 | 7  | 2680  | 2  | 1  | 2  | 1  | NA | 1  |
| Lymph-BNHL       | 41dba8d1-8aad-474c-a82b-20b28ab818bd | 14 | 106209666 | 106213684 | 20 | 4018  | 3  | 6  | 10 | 1  | NA | NA |
| Lymph-BNHL       | 41dba8d1-8aad-474c-a82b-20b28ab818bd | 14 | 106239548 | 106240704 | 9  | 1156  | NA | 4  | 5  | NA | NA | NA |
| Lymph-BNHL       | 41dba8d1-8aad-474c-a82b-20b28ab818bd | 14 | 106326646 | 106330263 | 86 | 3617  | 5  | 18 | 34 | 9  | 13 | 7  |
| Lymph-BNHL       | 41dba8d1-8aad-474c-a82b-20b28ab818bd | 14 | 106641753 | 106642538 | 16 | 785   | NA | 5  | 7  | 2  | 2  | NA |
| Lymph-BNHL       | 41dba8d1-8aad-474c-a82b-20b28ab818bd | 18 | 60983306  | 60988649  | 17 | 5343  | 2  | 2  | 6  | 3  | 2  | 2  |
| Lymph-BNHL       | 41dba8d1-8aad-474c-a82b-20b28ab818bd | 22 | 23040628  | 23041630  | 7  | 1002  | NA | 2  | 2  | 2  | NA | 1  |
| Lymph-BNHL       | 41dba8d1-8aad-474c-a82b-20b28ab818bd | 22 | 23055025  | 23063375  | 16 | 8350  | 2  | 6  | 3  | NA | 4  | 1  |
| Liver-HCC        | 41de507a-c623-11e3-bf01-24c6515278c0 | 1  | 177764645 | 177764711 | 6  | 66    | NA | NA | NA | 2  | 4  | NA |
| Breast-AdenoCa   | 41f140b8-72b9-4ae3-8b25-6144d9f94d0f | 1  | 28913577  | 28918102  | 6  | 4525  | 2  | NA | 4  | NA | NA | NA |
| Breast-AdenoCa   | 41f140b8-72b9-4ae3-8b25-6144d9f94d0f | 1  | 161886286 | 161886499 | 7  | 213   | NA | 4  | 3  | NA | NA | NA |
| Prost-AdenoCA    | 42a548f0-d86a-4273-8bda-be0fe6a53b20 | 6  | 26189122  | 26189215  | 13 | 93    | 2  | NA | 5  | 5  | 1  | NA |
| Panc-AdenoCA     | 42f00950-09c9-461a-8423-d5b04a96af10 | 7  | 139913785 | 139914358 | 7  | 573   | 2  | 2  | 3  | NA | NA | NA |
| Panc-AdenoCA     | 42f00950-09c9-461a-8423-d5b04a96af10 | 7  | 146973139 | 146974257 | 7  | 1118  | 1  | 3  | 3  | NA | NA | NA |
| Panc-AdenoCA     | 42f00950-09c9-461a-8423-d5b04a96af10 | 12 | 31692222  | 31692785  | 7  | 563   | 2  | 3  | 2  | NA | NA | NA |
| Panc-AdenoCA     | 42f00950-09c9-461a-8423-d5b04a96af10 | 12 | 53177233  | 53182524  | 7  | 5291  | 1  | 1  | 5  | NA | NA | NA |
| Panc-AdenoCA     | 42f00950-09c9-461a-8423-d5b04a96af10 | 12 | 54750224  | 54752042  | 7  | 1818  | 1  | 2  | 4  | NA | NA | NA |
| Panc-AdenoCA     | 42f00950-09c9-461a-8423-d5b04a96af10 | 12 | 57076561  | 57078277  | 16 | 1716  | 1  | 4  | 11 | NA | NA | NA |
| Panc-AdenoCA     | 42f00950-09c9-461a-8423-d5b04a96af10 | 12 | 57496333  | 57498995  | 14 | 2662  | 4  | 3  | 7  | NA | NA | NA |
| Panc-AdenoCA     | 42f00950-09c9-461a-8423-d5b04a96af10 | 12 | 59042419  | 59049428  | 16 | 7009  | 3  | 6  | 7  | NA | NA | NA |
| Panc-AdenoCA     | 42f00950-09c9-461a-8423-d5b04a96af10 | 12 | 59610166  | 59614483  | 19 | 4317  | 3  | 5  | 11 | NA | NA | NA |
| Panc-AdenoCA     | 42f00950-09c9-461a-8423-d5b04a96af10 | 12 | 59749829  | 59753157  | 21 | 3328  | 5  | 3  | 13 | NA | NA | NA |
| Panc-AdenoCA     | 42f00950-09c9-461a-8423-d5b04a96af10 | 12 | 61416804  | 61418121  | 8  | 1317  | 2  | NA | 6  | NA | NA | NA |
| Panc-AdenoCA     | 42f00950-09c9-461a-8423-d5b04a96af10 | 12 | 62147158  | 62152788  | 8  | 5630  | NA | 4  | 4  | NA | NA | NA |
| Panc-AdenoCA     | 42f00950-09c9-461a-8423-d5b04a96af10 | 12 | 63301715  | 63312892  | 13 | 11177 | 1  | 3  | 8  | NA | 1  | NA |
| Panc-AdenoCA     | 42f00950-09c9-461a-8423-d5b04a96af10 | 19 | 39381438  | 39382954  | 7  | 1516  | 2  | 1  | 4  | NA | NA | NA |
| Panc-AdenoCA     | 42f00950-09c9-461a-8423-d5b04a96af10 | X  | 116544840 | 116545161 | 6  | 321   | 1  | 2  | 3  | NA | NA | NA |
| Liver-HCC        | 43206cb7-787d-4f68-8019-55e8585c4b4d | 1  | 244044716 | 244045600 | 10 | 884   | 1  | 7  | 2  | NA | NA | NA |
| Lung-SCC         | 43aa4123-0fe2-4071-8a81-cbdd0410b917 | 1  | 34532736  | 34542721  | 11 | 9985  | 1  | 2  | 7  | NA | NA | 1  |
| Lung-SCC         | 43aa4123-0fe2-4071-8a81-cbdd0410b917 | 1  | 72833685  | 72837753  | 8  | 4068  | 1  | 2  | 5  | NA | NA | NA |
| Lung-SCC         | 43aa4123-0fe2-4071-8a81-cbdd0410b917 | 1  | 72845146  | 72848659  | 8  | 3513  | 1  | 3  | 4  | NA | NA | NA |
| Lung-SCC         | 43aa4123-0fe2-4071-8a81-cbdd0410b917 | 1  | 90191100  | 90193884  | 9  | 2784  | 3  | 1  | 5  | NA | NA | NA |
| Lung-SCC         | 43aa4123-0fe2-4071-8a81-cbdd0410b917 | 1  | 191951665 | 191954545 | 9  | 2880  | NA | 1  | 8  | NA | NA | NA |
| Lung-SCC         | 43aa4123-0fe2-4071-8a81-cbdd0410b917 | 9  | 22401664  | 22403626  | 16 | 1962  | NA | 1  | 15 | NA | NA | NA |
| Lung-SCC         | 43aa4123-0fe2-4071-8a81-cbdd0410b917 | 9  | 92729993  | 92733351  | 14 | 3358  | NA | 1  | 13 | NA | NA | NA |
| Lung-SCC         | 43aa4123-0fe2-4071-8a81-cbdd0410b917 | 9  | 113967313 | 113971905 | 15 | 4592  | 2  | 4  | 9  | NA | NA | NA |
| Lung-SCC         | 43aa4123-0fe2-4071-8a81-cbdd0410b917 | 9  | 118123359 | 118125713 | 22 | 2354  | 4  | 13 | 4  | NA | 1  | NA |
| Lung-SCC         | 43aa4123-0fe2-4071-8a81-cbdd0410b917 | 17 | 19908402  | 19911036  | 10 | 2634  | NA | 3  | 7  | NA | NA | NA |
| Lung-SCC         | 43aa4123-0fe2-4071-8a81-cbdd0410b917 | 19 | 19637523  | 19637756  | 6  | 233   | NA | 4  | 2  | NA | NA | NA |
| Cervix-SCC       | 43be43cb-a367-4a74-94e4-973acafcf576 | 1  | 33632406  | 33635516  | 6  | 3110  | 1  | NA | 5  | NA | NA | NA |
| Cervix-SCC       | 43be43cb-a367-4a74-94e4-973acafcf576 | 2  | 32555421  | 32558225  | 12 | 2804  | 1  | 3  | 7  | NA | NA | 1  |
| Cervix-SCC       | 43be43cb-a367-4a74-94e4-973acafcf576 | 2  | 237388982 | 237394786 | 9  | 5804  | 4  | 2  | 3  | NA | NA | NA |

|                |                                      |    |           |           |     |       |    |    |    |    |    |    |
|----------------|--------------------------------------|----|-----------|-----------|-----|-------|----|----|----|----|----|----|
| Cervix-SCC     | 43be43cb-a367-4a74-94e4-973acafcf576 | 3  | 178786361 | 178787764 | 6   | 1403  | 1  | 1  | 3  | NA | 1  | NA |
| Cervix-SCC     | 43be43cb-a367-4a74-94e4-973acafcf576 | 6  | 113828619 | 113831815 | 6   | 3196  | NA | 5  | 1  | NA | NA | NA |
| Cervix-SCC     | 43be43cb-a367-4a74-94e4-973acafcf576 | 6  | 129007539 | 129012765 | 9   | 5226  | 1  | 4  | 4  | NA | NA | NA |
| Cervix-SCC     | 43be43cb-a367-4a74-94e4-973acafcf576 | 7  | 65625829  | 65629052  | 6   | 3223  | 1  | 2  | 3  | NA | NA | NA |
| Cervix-SCC     | 43be43cb-a367-4a74-94e4-973acafcf576 | 10 | 75511672  | 75516110  | 6   | 4438  | NA | 2  | 4  | NA | NA | NA |
| Cervix-SCC     | 43be43cb-a367-4a74-94e4-973acafcf576 | 10 | 78173099  | 78177790  | 8   | 4691  | NA | 1  | 7  | NA | NA | NA |
| Cervix-SCC     | 43be43cb-a367-4a74-94e4-973acafcf576 | 12 | 65802010  | 65804546  | 6   | 2536  | 1  | 1  | 4  | NA | NA | NA |
| Cervix-SCC     | 43be43cb-a367-4a74-94e4-973acafcf576 | 12 | 92296632  | 92299275  | 8   | 2643  | NA | 1  | 7  | NA | NA | NA |
| Cervix-SCC     | 43be43cb-a367-4a74-94e4-973acafcf576 | 12 | 118572044 | 118576508 | 7   | 4464  | NA | 5  | 2  | NA | NA | NA |
| Cervix-SCC     | 43be43cb-a367-4a74-94e4-973acafcf576 | 15 | 90903062  | 90907251  | 6   | 4189  | NA | 3  | 3  | NA | NA | NA |
| Cervix-SCC     | 43be43cb-a367-4a74-94e4-973acafcf576 | 16 | 28918574  | 28922576  | 7   | 4002  | NA | 2  | 5  | NA | NA | NA |
| Cervix-SCC     | 43be43cb-a367-4a74-94e4-973acafcf576 | 17 | 59326095  | 59335913  | 27  | 9818  | 7  | 9  | 11 | NA | NA | NA |
| Cervix-SCC     | 43be43cb-a367-4a74-94e4-973acafcf576 | 17 | 74162851  | 74167300  | 7   | 4449  | NA | 2  | 5  | NA | NA | NA |
| Cervix-SCC     | 43be43cb-a367-4a74-94e4-973acafcf576 | 21 | 40007996  | 40023076  | 23  | 15080 | 4  | 10 | 9  | NA | NA | NA |
| Lymph-CLL      | 43d630aa-3890-401c-bf56-e3a9f325734f | 3  | 186783612 | 186784093 | 6   | 481   | NA | 1  | NA | 4  | NA | 1  |
| Lymph-CLL      | 43d630aa-3890-401c-bf56-e3a9f325734f | 9  | 94476659  | 94476755  | 7   | 96    | 2  | NA | NA | 2  | 2  | 1  |
| Lymph-CLL      | 43d630aa-3890-401c-bf56-e3a9f325734f | 13 | 70939587  | 70943098  | 6   | 3511  | NA | 2  | NA | NA | 1  | 3  |
| Lymph-CLL      | 43d630aa-3890-401c-bf56-e3a9f325734f | 14 | 106239539 | 106241570 | 12  | 2031  | 1  | 4  | 6  | 1  | NA | NA |
| Lymph-CLL      | 43d630aa-3890-401c-bf56-e3a9f325734f | 14 | 106323653 | 106330831 | 84  | 7178  | 8  | 18 | 19 | 25 | 7  | 7  |
| Lymph-CLL      | 43d630aa-3890-401c-bf56-e3a9f325734f | 14 | 106829735 | 106830668 | 11  | 933   | 1  | 2  | NA | 6  | 1  | 1  |
| Lymph-CLL      | 43d630aa-3890-401c-bf56-e3a9f325734f | 22 | 22734419  | 22735525  | 10  | 1106  | 2  | 4  | 2  | 2  | NA | NA |
| Lymph-CLL      | 43d630aa-3890-401c-bf56-e3a9f325734f | 22 | 23164788  | 23165649  | 11  | 861   | 2  | 3  | 1  | 5  | NA | NA |
| Lymph-CLL      | 43d630aa-3890-401c-bf56-e3a9f325734f | 22 | 23247191  | 23247626  | 11  | 435   | 1  | NA | 5  | 5  | NA | NA |
| Breast-AdenoCa | 43f7a2e0-fec9-4e43-872d-18c6c946fa17 | 5  | 85284055  | 85284386  | 7   | 331   | 1  | 3  | 1  | 1  | NA | 1  |
| Breast-AdenoCa | 43f7a2e0-fec9-4e43-872d-18c6c946fa17 | 5  | 98112578  | 98113209  | 7   | 631   | 2  | 4  | 1  | NA | NA | NA |
| Breast-AdenoCa | 43f7a2e0-fec9-4e43-872d-18c6c946fa17 | 7  | 57948179  | 57949441  | 7   | 1262  | NA | 4  | 3  | NA | NA | NA |
| Prost-AdenoCA  | 44083f54-0953-48e3-a704-11ad0988ad2e | 2  | 146383828 | 146384462 | 7   | 634   | 1  | 3  | 3  | NA | NA | NA |
| Panc-AdenoCA   | 441d2f21-b448-4fc8-8c54-9b85aca56237 | 14 | 60770474  | 60771242  | 6   | 768   | NA | 5  | 1  | NA | NA | NA |
| Panc-AdenoCA   | 441d2f21-b448-4fc8-8c54-9b85aca56237 | X  | 22366297  | 22366789  | 9   | 492   | NA | NA | 9  | NA | NA | NA |
| Liver-HCC      | 446437de-c622-11e3-bf01-24c6515278c0 | 1  | 100138295 | 100140412 | 7   | 2117  | NA | 6  | 1  | NA | NA | NA |
| Skin-Melanoma  | 450e8eba-a3a9-4dcb-b423-e33dfcd5c34e | 1  | 239233675 | 239271107 | 43  | 37432 | NA | 2  | 40 | NA | NA | 1  |
| Skin-Melanoma  | 450e8eba-a3a9-4dcb-b423-e33dfcd5c34e | 1  | 240587275 | 240609828 | 147 | 22553 | NA | NA | ## | NA | NA | NA |
| Skin-Melanoma  | 450e8eba-a3a9-4dcb-b423-e33dfcd5c34e | 2  | 181646435 | 181647356 | 10  | 921   | 1  | 8  | NA | NA | 1  | NA |
| Skin-Melanoma  | 450e8eba-a3a9-4dcb-b423-e33dfcd5c34e | 5  | 11509543  | 11511282  | 6   | 1739  | 1  | 2  | 3  | NA | NA | NA |
| Skin-Melanoma  | 450e8eba-a3a9-4dcb-b423-e33dfcd5c34e | 5  | 22232154  | 22236167  | 7   | 4013  | NA | 4  | 2  | 1  | NA | NA |
| Skin-Melanoma  | 450e8eba-a3a9-4dcb-b423-e33dfcd5c34e | 5  | 22398092  | 22399279  | 8   | 1187  | NA | NA | 8  | NA | NA | NA |
| Skin-Melanoma  | 450e8eba-a3a9-4dcb-b423-e33dfcd5c34e | 5  | 25842020  | 25843841  | 7   | 1821  | 2  | 4  | 1  | NA | NA | NA |
| Skin-Melanoma  | 450e8eba-a3a9-4dcb-b423-e33dfcd5c34e | 7  | 50288027  | 50288468  | 7   | 441   | 1  | 4  | 2  | NA | NA | NA |
| Skin-Melanoma  | 450e8eba-a3a9-4dcb-b423-e33dfcd5c34e | 7  | 50321640  | 50323128  | 7   | 1488  | 4  | 2  | 1  | NA | NA | NA |
| Skin-Melanoma  | 450e8eba-a3a9-4dcb-b423-e33dfcd5c34e | 16 | 67982152  | 67985787  | 7   | 3635  | 4  | 1  | 2  | NA | NA | NA |
| Skin-Melanoma  | 450e8eba-a3a9-4dcb-b423-e33dfcd5c34e | 16 | 89015410  | 89020339  | 7   | 4929  | 3  | 2  | 2  | NA | NA | NA |
| Skin-Melanoma  | 450e8eba-a3a9-4dcb-b423-e33dfcd5c34e | 16 | 89068035  | 89068449  | 9   | 414   | 2  | 2  | 5  | NA | NA | NA |
| Skin-Melanoma  | 450e8eba-a3a9-4dcb-b423-e33dfcd5c34e | 16 | 89132468  | 89133008  | 7   | 540   | 2  | 3  | 2  | NA | NA | NA |
| Skin-Melanoma  | 450e8eba-a3a9-4dcb-b423-e33dfcd5c34e | 21 | 45458435  | 45463422  | 17  | 4987  | 3  | 6  | 8  | NA | NA | NA |
| Kidney-RCC     | 45348eff-4b09-4776-825e-b18de9dba937 | 9  | 130633690 | 130635520 | 6   | 1830  | NA | 2  | 4  | NA | NA | NA |
| Bladder-TCC    | 45a7949d-e63f-4956-866c-df51257032de | 1  | 149889351 | 149893977 | 6   | 4626  | NA | 2  | 4  | NA | NA | NA |
| Bladder-TCC    | 45a7949d-e63f-4956-866c-df51257032de | 2  | 32258660  | 32261913  | 8   | 3253  | 1  | 4  | 3  | NA | NA | NA |
| Bladder-TCC    | 45a7949d-e63f-4956-866c-df51257032de | 2  | 73307050  | 73309800  | 7   | 2750  | 1  | 4  | 2  | NA | NA | NA |
| Bladder-TCC    | 45a7949d-e63f-4956-866c-df51257032de | 5  | 59005310  | 59009592  | 6   | 4282  | 1  | 1  | 4  | NA | NA | NA |
| Bladder-TCC    | 45a7949d-e63f-4956-866c-df51257032de | 7  | 66053278  | 66058549  | 8   | 5271  | NA | 6  | 2  | NA | NA | NA |
| Bladder-TCC    | 45a7949d-e63f-4956-866c-df51257032de | 8  | 17315101  | 17318389  | 6   | 3288  | NA | 1  | 5  | NA | NA | NA |
| Bladder-TCC    | 45a7949d-e63f-4956-866c-df51257032de | 8  | 18610894  | 18617770  | 10  | 6876  | NA | 4  | 6  | NA | NA | NA |
| Bladder-TCC    | 45a7949d-e63f-4956-866c-df51257032de | 9  | 37826716  | 37828129  | 6   | 1413  | 1  | 3  | 2  | NA | NA | NA |
| Bladder-TCC    | 45a7949d-e63f-4956-866c-df51257032de | 10 | 62788187  | 62789045  | 8   | 858   | NA | 2  | 6  | NA | NA | NA |
| Bladder-TCC    | 45a7949d-e63f-4956-866c-df51257032de | 10 | 71311404  | 71313080  | 8   | 1676  | 3  | 2  | 3  | NA | NA | NA |
| Bladder-TCC    | 45a7949d-e63f-4956-866c-df51257032de | 13 | 101333481 | 101340509 | 22  | 7028  | NA | 12 | 9  | 1  | NA | NA |
| Bladder-TCC    | 45a7949d-e63f-4956-866c-df51257032de | 15 | 65530304  | 65533399  | 8   | 3095  | 2  | 3  | 3  | NA | NA | NA |
| Bladder-TCC    | 45a7949d-e63f-4956-866c-df51257032de | 15 | 79020597  | 79024593  | 7   | 3996  | 1  | 4  | 2  | NA | NA | NA |
| Bladder-TCC    | 45a7949d-e63f-4956-866c-df51257032de | 17 | 46523823  | 46528001  | 9   | 4178  | NA | 5  | 4  | NA | NA | NA |
| Bladder-TCC    | 45a7949d-e63f-4956-866c-df51257032de | 17 | 68250621  | 68255907  | 9   | 5286  | 4  | 2  | 3  | NA | NA | NA |

|                |                                      |    |           |           |     |       |    |    |    |    |    |    |
|----------------|--------------------------------------|----|-----------|-----------|-----|-------|----|----|----|----|----|----|
| Bladder-TCC    | 45a7949d-e63f-4956-866c-df51257032de | 18 | 366360    | 371227    | 8   | 4867  | NA | 2  | 6  | NA | NA | NA |
| Bladder-TCC    | 45a7949d-e63f-4956-866c-df51257032de | 18 | 33369134  | 33370024  | 7   | 890   | 1  | 2  | 4  | NA | NA | NA |
| Bladder-TCC    | 45a7949d-e63f-4956-866c-df51257032de | 19 | 1353274   | 1361265   | 12  | 7991  | NA | 2  | 10 | NA | NA | NA |
| Bladder-TCC    | 45a7949d-e63f-4956-866c-df51257032de | 20 | 6057762   | 6058362   | 6   | 600   | 1  | 3  | 2  | NA | NA | NA |
| Bladder-TCC    | 45a7949d-e63f-4956-866c-df51257032de | Y  | 14174703  | 14180252  | 9   | 5549  | NA | 1  | 8  | NA | NA | NA |
| Uterus-AdenoCA | 460f7427-ebcf-404b-9e9e-e0278d0bca95 | 1  | 28076952  | 28090538  | 21  | 13586 | 5  | 8  | 8  | NA | NA | NA |
| Uterus-AdenoCA | 460f7427-ebcf-404b-9e9e-e0278d0bca95 | 3  | 85250261  | 85251216  | 9   | 955   | 2  | 3  | 4  | NA | NA | NA |
| Uterus-AdenoCA | 460f7427-ebcf-404b-9e9e-e0278d0bca95 | 4  | 137210548 | 137210678 | 8   | 130   | NA | NA | NA | 8  | NA | NA |
| Uterus-AdenoCA | 460f7427-ebcf-404b-9e9e-e0278d0bca95 | 6  | 51659480  | 51660092  | 7   | 612   | NA | 1  | 6  | NA | NA | NA |
| Uterus-AdenoCA | 460f7427-ebcf-404b-9e9e-e0278d0bca95 | 6  | 106037480 | 106043735 | 9   | 6255  | 1  | 3  | 5  | NA | NA | NA |
| Uterus-AdenoCA | 460f7427-ebcf-404b-9e9e-e0278d0bca95 | 6  | 108015372 | 108023578 | 18  | 8206  | 5  | 6  | 7  | NA | NA | NA |
| Uterus-AdenoCA | 460f7427-ebcf-404b-9e9e-e0278d0bca95 | 7  | 32981117  | 32983307  | 7   | 2190  | 4  | NA | 3  | NA | NA | NA |
| Uterus-AdenoCA | 460f7427-ebcf-404b-9e9e-e0278d0bca95 | 7  | 140910812 | 140916302 | 13  | 5490  | 4  | 8  | 1  | NA | NA | NA |
| Uterus-AdenoCA | 460f7427-ebcf-404b-9e9e-e0278d0bca95 | 8  | 43690877  | 43692435  | 9   | 1558  | 1  | 3  | 5  | NA | NA | NA |
| Uterus-AdenoCA | 460f7427-ebcf-404b-9e9e-e0278d0bca95 | 8  | 138629308 | 138629947 | 22  | 639   | NA | 3  | 19 | NA | NA | NA |
| Uterus-AdenoCA | 460f7427-ebcf-404b-9e9e-e0278d0bca95 | 12 | 2649662   | 2654450   | 11  | 4788  | 2  | 3  | 6  | NA | NA | NA |
| Uterus-AdenoCA | 460f7427-ebcf-404b-9e9e-e0278d0bca95 | 17 | 76456733  | 76457033  | 7   | 300   | 4  | 2  | 1  | NA | NA | NA |
| Uterus-AdenoCA | 460f7427-ebcf-404b-9e9e-e0278d0bca95 | 18 | 34086585  | 34091739  | 9   | 5154  | 2  | 5  | 2  | NA | NA | NA |
| Uterus-AdenoCA | 460f7427-ebcf-404b-9e9e-e0278d0bca95 | X  | 63188280  | 63188745  | 6   | 465   | NA | 4  | 2  | NA | NA | NA |
| Lymph-BNHL     | 461df2ae-fcf1-4b93-be0a-c14954fe7c42 | 2  | 187045637 | 187046165 | 6   | 528   | NA | NA | NA | 1  | 2  | 3  |
| Lymph-BNHL     | 461df2ae-fcf1-4b93-be0a-c14954fe7c42 | 3  | 187461794 | 187474022 | 40  | 12228 | 3  | 8  | 5  | 11 | 4  | 9  |
| Lymph-BNHL     | 461df2ae-fcf1-4b93-be0a-c14954fe7c42 | 4  | 179135906 | 179136723 | 6   | 817   | NA | 1  | 2  | NA | 2  | 1  |
| Lymph-BNHL     | 461df2ae-fcf1-4b93-be0a-c14954fe7c42 | 12 | 113494186 | 113496353 | 8   | 2167  | 1  | 1  | 4  | 2  | NA | NA |
| Lymph-BNHL     | 461df2ae-fcf1-4b93-be0a-c14954fe7c42 | 14 | 106110374 | 106115395 | 64  | 5021  | 3  | 10 | 41 | 6  | 1  | 3  |
| Lymph-BNHL     | 461df2ae-fcf1-4b93-be0a-c14954fe7c42 | 14 | 106208151 | 106330036 | 318 | 1E+05 | 24 | 65 | ## | 61 | 16 | 26 |
| Lymph-BNHL     | 461df2ae-fcf1-4b93-be0a-c14954fe7c42 | 14 | 106829910 | 106830730 | 36  | 820   | 2  | 4  | 5  | 14 | 4  | 7  |
| Lymph-BNHL     | 461df2ae-fcf1-4b93-be0a-c14954fe7c42 | 14 | 107169708 | 107179022 | 12  | 9314  | NA | 2  | 6  | 3  | NA | 1  |
| Lymph-BNHL     | 461df2ae-fcf1-4b93-be0a-c14954fe7c42 | 22 | 22707524  | 22712226  | 9   | 4702  | 1  | NA | 1  | 4  | NA | 3  |
| Lymph-BNHL     | 461df2ae-fcf1-4b93-be0a-c14954fe7c42 | 22 | 23100275  | 23101478  | 36  | 1203  | 1  | 6  | 12 | 5  | 8  | 4  |
| Lymph-BNHL     | 461df2ae-fcf1-4b93-be0a-c14954fe7c42 | 22 | 23242159  | 23249358  | 18  | 7199  | NA | NA | 8  | 6  | 2  | 2  |
| Panc-AdenoCA   | 4652ae03-b096-42d0-bdfa-3f6281d4f023 | 1  | 196630671 | 196633235 | 6   | 2564  | NA | 4  | 2  | NA | NA | NA |
| Panc-AdenoCA   | 4652ae03-b096-42d0-bdfa-3f6281d4f023 | 3  | 13827285  | 13832415  | 15  | 5130  | 1  | 8  | 6  | NA | NA | NA |
| Panc-AdenoCA   | 4652ae03-b096-42d0-bdfa-3f6281d4f023 | 8  | 35516860  | 35518011  | 6   | 1151  | NA | 2  | 4  | NA | NA | NA |
| Panc-AdenoCA   | 4652ae03-b096-42d0-bdfa-3f6281d4f023 | 13 | 48474161  | 48474441  | 6   | 280   | 1  | NA | 5  | NA | NA | NA |
| Panc-AdenoCA   | 4652ae03-b096-42d0-bdfa-3f6281d4f023 | 17 | 15136786  | 15138987  | 10  | 2201  | NA | 5  | 5  | NA | NA | NA |
| Panc-AdenoCA   | 4652ae03-b096-42d0-bdfa-3f6281d4f023 | 17 | 15888658  | 15890633  | 12  | 1975  | 1  | 2  | 9  | NA | NA | NA |
| Panc-AdenoCA   | 4652ae03-b096-42d0-bdfa-3f6281d4f023 | 20 | 44437071  | 44442520  | 23  | 5449  | 3  | 7  | 13 | NA | NA | NA |
| Breast-AdenoCa | 467ef778-f481-44f3-9768-b9900252d2ba | 10 | 44601139  | 44601792  | 6   | 653   | 1  | 4  | NA | NA | 1  | NA |
| Head-SCC       | 46d35b82-e1b7-4d35-be5e-3a70fd47e421 | 1  | 66022133  | 66023219  | 6   | 1086  | 1  | 2  | 3  | NA | NA | NA |
| Head-SCC       | 46d35b82-e1b7-4d35-be5e-3a70fd47e421 | 2  | 86889632  | 86891329  | 6   | 1697  | NA | 1  | 5  | NA | NA | NA |
| Head-SCC       | 46d35b82-e1b7-4d35-be5e-3a70fd47e421 | 3  | 114358992 | 114360503 | 8   | 1511  | NA | 2  | 6  | NA | NA | NA |
| Head-SCC       | 46d35b82-e1b7-4d35-be5e-3a70fd47e421 | 5  | 33534815  | 33536504  | 10  | 1689  | NA | 6  | 4  | NA | NA | NA |
| Head-SCC       | 46d35b82-e1b7-4d35-be5e-3a70fd47e421 | 6  | 149971998 | 149977619 | 11  | 5621  | NA | 4  | 7  | NA | NA | NA |
| Head-SCC       | 46d35b82-e1b7-4d35-be5e-3a70fd47e421 | 7  | 111752063 | 111755752 | 7   | 3689  | NA | 3  | 4  | NA | NA | NA |
| Head-SCC       | 46d35b82-e1b7-4d35-be5e-3a70fd47e421 | 7  | 151895227 | 151897794 | 7   | 2567  | NA | 4  | 3  | NA | NA | NA |
| Head-SCC       | 46d35b82-e1b7-4d35-be5e-3a70fd47e421 | 7  | 153388528 | 153392566 | 8   | 4038  | NA | 3  | 5  | NA | NA | NA |
| Head-SCC       | 46d35b82-e1b7-4d35-be5e-3a70fd47e421 | 8  | 23605251  | 23607418  | 6   | 2167  | 1  | 1  | 4  | NA | NA | NA |
| Head-SCC       | 46d35b82-e1b7-4d35-be5e-3a70fd47e421 | 9  | 127064104 | 127066798 | 7   | 2694  | NA | 3  | 4  | NA | NA | NA |
| Head-SCC       | 46d35b82-e1b7-4d35-be5e-3a70fd47e421 | 12 | 4500699   | 4505109   | 6   | 4410  | NA | 1  | 5  | NA | NA | NA |
| Head-SCC       | 46d35b82-e1b7-4d35-be5e-3a70fd47e421 | 15 | 60260846  | 60261639  | 7   | 793   | NA | 3  | 4  | NA | NA | NA |
| Head-SCC       | 46d35b82-e1b7-4d35-be5e-3a70fd47e421 | 17 | 66013703  | 66016009  | 7   | 2306  | 1  | 3  | 3  | NA | NA | NA |
| Head-SCC       | 46d35b82-e1b7-4d35-be5e-3a70fd47e421 | 19 | 20702885  | 20703104  | 6   | 219   | 1  | 2  | 3  | NA | NA | NA |
| Head-SCC       | 46d35b82-e1b7-4d35-be5e-3a70fd47e421 | 22 | 31776706  | 31779439  | 9   | 2733  | NA | 5  | 4  | NA | NA | NA |
| Head-SCC       | 46d35b82-e1b7-4d35-be5e-3a70fd47e421 | X  | 100412349 | 100414647 | 6   | 2298  | NA | 1  | 5  | NA | NA | NA |
| Panc-AdenoCA   | 46e166fe-3b20-49ad-98db-42c854c61c93 | 1  | 161948367 | 161950058 | 6   | 1691  | NA | 3  | 3  | NA | NA | NA |
| Panc-AdenoCA   | 46e166fe-3b20-49ad-98db-42c854c61c93 | 3  | 136389701 | 136390675 | 6   | 974   | NA | 1  | 5  | NA | NA | NA |
| Panc-AdenoCA   | 46e166fe-3b20-49ad-98db-42c854c61c93 | 10 | 125214896 | 125216137 | 9   | 1241  | NA | NA | 9  | NA | NA | NA |
| Ovary-AdenoCA  | 46f19b5c-3eba-4b23-a1ab-9748090ca4e5 | 1  | 203270780 | 203276706 | 8   | 5926  | 2  | 2  | 3  | NA | NA | 1  |
| Ovary-AdenoCA  | 46f19b5c-3eba-4b23-a1ab-9748090ca4e5 | 12 | 10052173  | 10058575  | 10  | 6402  | NA | 6  | 4  | NA | NA | NA |
| Ovary-AdenoCA  | 46f19b5c-3eba-4b23-a1ab-9748090ca4e5 | 15 | 35394205  | 35394346  | 11  | 141   | NA | 2  | 3  | 4  | NA | 2  |

|                |                                      |    |           |           |    |      |    |    |    |    |    |    |
|----------------|--------------------------------------|----|-----------|-----------|----|------|----|----|----|----|----|----|
| Breast-AdenoCa | 47312f61-5ef4-4f25-9320-8fbb4758790e | 1  | 207024300 | 207027962 | 12 | 3662 | 1  | 9  | 2  | NA | NA | NA |
| Breast-AdenoCa | 47312f61-5ef4-4f25-9320-8fbb4758790e | 1  | 208206125 | 208211147 | 8  | 5022 | 1  | 1  | 5  | NA | NA | 1  |
| Breast-AdenoCa | 47312f61-5ef4-4f25-9320-8fbb4758790e | 1  | 209503430 | 209509374 | 14 | 5944 | 2  | 5  | 7  | NA | NA | NA |
| Breast-AdenoCa | 47312f61-5ef4-4f25-9320-8fbb4758790e | 1  | 210258458 | 210261378 | 9  | 2920 | 1  | 3  | 5  | NA | NA | NA |
| Breast-AdenoCa | 47312f61-5ef4-4f25-9320-8fbb4758790e | 1  | 210364684 | 210374448 | 17 | 9764 | 1  | 6  | 10 | NA | NA | NA |
| Breast-AdenoCa | 47312f61-5ef4-4f25-9320-8fbb4758790e | 1  | 210475828 | 210483631 | 11 | 7803 | 1  | 5  | 4  | NA | NA | 1  |
| Breast-AdenoCa | 47312f61-5ef4-4f25-9320-8fbb4758790e | 1  | 210895645 | 210898580 | 13 | 2935 | 4  | 4  | 5  | NA | NA | NA |
| Breast-AdenoCa | 47312f61-5ef4-4f25-9320-8fbb4758790e | 1  | 211106896 | 211107515 | 11 | 619  | NA | 1  | 10 | NA | NA | NA |
| Breast-AdenoCa | 47312f61-5ef4-4f25-9320-8fbb4758790e | 1  | 213448768 | 213457508 | 10 | 8740 | 2  | 6  | 2  | NA | NA | NA |
| Breast-AdenoCa | 47312f61-5ef4-4f25-9320-8fbb4758790e | 1  | 215629490 | 215636416 | 15 | 6926 | 1  | 9  | 5  | NA | NA | NA |
| Breast-AdenoCa | 47312f61-5ef4-4f25-9320-8fbb4758790e | 1  | 216329305 | 216330306 | 7  | 1001 | NA | 2  | 5  | NA | NA | NA |
| Breast-AdenoCa | 47312f61-5ef4-4f25-9320-8fbb4758790e | 1  | 218043401 | 218050532 | 15 | 7131 | 2  | 3  | 10 | NA | NA | NA |
| Breast-AdenoCa | 47312f61-5ef4-4f25-9320-8fbb4758790e | 1  | 219518926 | 219521414 | 10 | 2488 | 1  | 2  | 5  | 1  | 1  | NA |
| Breast-AdenoCa | 47312f61-5ef4-4f25-9320-8fbb4758790e | 1  | 221599385 | 221603658 | 7  | 4273 | 1  | 4  | 2  | NA | NA | NA |
| Breast-AdenoCa | 47312f61-5ef4-4f25-9320-8fbb4758790e | 1  | 223420375 | 223421643 | 7  | 1268 | 1  | 2  | 4  | NA | NA | NA |
| Breast-AdenoCa | 47312f61-5ef4-4f25-9320-8fbb4758790e | 1  | 225117821 | 225122006 | 8  | 4185 | NA | 5  | 3  | NA | NA | NA |
| Breast-AdenoCa | 47312f61-5ef4-4f25-9320-8fbb4758790e | 12 | 27633247  | 27633381  | 6  | 134  | 1  | 2  | 3  | NA | NA | NA |
| Breast-AdenoCa | 47312f61-5ef4-4f25-9320-8fbb4758790e | 14 | 60406706  | 60410766  | 11 | 4060 | 2  | 1  | 8  | NA | NA | NA |
| Breast-AdenoCa | 47312f61-5ef4-4f25-9320-8fbb4758790e | 14 | 62699888  | 62702647  | 11 | 2759 | 1  | 3  | 7  | NA | NA | NA |
| Breast-AdenoCa | 47312f61-5ef4-4f25-9320-8fbb4758790e | 14 | 66197184  | 66202267  | 12 | 5083 | NA | 4  | 8  | NA | NA | NA |
| Breast-AdenoCa | 47312f61-5ef4-4f25-9320-8fbb4758790e | 14 | 66337946  | 66341475  | 12 | 3529 | 3  | 4  | 5  | NA | NA | NA |
| Breast-AdenoCa | 47312f61-5ef4-4f25-9320-8fbb4758790e | 22 | 33889076  | 33891216  | 7  | 2140 | 1  | 1  | 5  | NA | NA | NA |
| Eso-AdenoCa    | 47874ff4-0b1c-4a31-9192-2a10e93ce9a1 | 2  | 156531127 | 156531617 | 13 | 490  | NA | NA | NA | 13 | NA | NA |
| Eso-AdenoCa    | 47874ff4-0b1c-4a31-9192-2a10e93ce9a1 | 3  | 55542938  | 55547471  | 8  | 4533 | 1  | 5  | 2  | NA | NA | NA |
| Eso-AdenoCa    | 47874ff4-0b1c-4a31-9192-2a10e93ce9a1 | 3  | 194230871 | 194232949 | 9  | 2078 | 1  | NA | 8  | NA | NA | NA |
| Eso-AdenoCa    | 47874ff4-0b1c-4a31-9192-2a10e93ce9a1 | 5  | 34077855  | 34079869  | 6  | 2014 | 1  | 1  | 4  | NA | NA | NA |
| Eso-AdenoCa    | 47874ff4-0b1c-4a31-9192-2a10e93ce9a1 | 6  | 10525624  | 10529304  | 18 | 3680 | 2  | 2  | 14 | NA | NA | NA |
| Eso-AdenoCa    | 47874ff4-0b1c-4a31-9192-2a10e93ce9a1 | 7  | 129264340 | 129265572 | 10 | 1232 | 2  | 6  | 2  | NA | NA | NA |
| Eso-AdenoCa    | 47874ff4-0b1c-4a31-9192-2a10e93ce9a1 | 11 | 90453426  | 90453698  | 7  | 272  | NA | 4  | 3  | NA | NA | NA |
| Eso-AdenoCa    | 47874ff4-0b1c-4a31-9192-2a10e93ce9a1 | 12 | 64842759  | 64844167  | 9  | 1408 | NA | NA | NA | 9  | NA | NA |
| Eso-AdenoCa    | 47874ff4-0b1c-4a31-9192-2a10e93ce9a1 | 12 | 125794025 | 125796713 | 9  | 2688 | 3  | 4  | 2  | NA | NA | NA |
| Eso-AdenoCa    | 47874ff4-0b1c-4a31-9192-2a10e93ce9a1 | 18 | 38538574  | 38539179  | 6  | 605  | 3  | 1  | 2  | NA | NA | NA |
| Eso-AdenoCa    | 47874ff4-0b1c-4a31-9192-2a10e93ce9a1 | 19 | 39355228  | 39359714  | 9  | 4486 | NA | NA | 1  | 8  | NA | NA |
| Eso-AdenoCa    | 47874ff4-0b1c-4a31-9192-2a10e93ce9a1 | 19 | 45218211  | 45218965  | 11 | 754  | 4  | 1  | 5  | NA | NA | 1  |
| Eso-AdenoCa    | 47874ff4-0b1c-4a31-9192-2a10e93ce9a1 | 19 | 47987643  | 47988378  | 9  | 735  | 3  | NA | 5  | NA | NA | 1  |
| Eso-AdenoCa    | 47874ff4-0b1c-4a31-9192-2a10e93ce9a1 | 19 | 55848969  | 55850953  | 14 | 1984 | 2  | 1  | 11 | NA | NA | NA |
| Eso-AdenoCa    | 47874ff4-0b1c-4a31-9192-2a10e93ce9a1 | 22 | 37173107  | 37176002  | 10 | 2895 | NA | 8  | 2  | NA | NA | NA |
| Eso-AdenoCa    | 47874ff4-0b1c-4a31-9192-2a10e93ce9a1 | X  | 98854274  | 98858623  | 6  | 4349 | NA | 4  | 2  | NA | NA | NA |
| Liver-HCC      | 47e5ff56-9534-4fcf-a593-33027e877f93 | X  | 67033624  | 67035995  | 10 | 2371 | NA | 6  | 4  | NA | NA | NA |
| Bladder-TCC    | 4838b5a9-968c-4178-bffb-3fafa1f6dc09 | 6  | 14657080  | 14657992  | 6  | 912  | 1  | 3  | 2  | NA | NA | NA |
| Bladder-TCC    | 4838b5a9-968c-4178-bffb-3fafa1f6dc09 | 8  | 9555298   | 9555931   | 8  | 633  | 2  | 4  | 2  | NA | NA | NA |
| Bladder-TCC    | 4838b5a9-968c-4178-bffb-3fafa1f6dc09 | 11 | 58608468  | 58613705  | 7  | 5237 | 1  | 4  | 1  | NA | NA | 1  |
| Bladder-TCC    | 4838b5a9-968c-4178-bffb-3fafa1f6dc09 | 12 | 92130722  | 92134158  | 19 | 3436 | 2  | 11 | 6  | NA | NA | NA |
| Bladder-TCC    | 4838b5a9-968c-4178-bffb-3fafa1f6dc09 | 17 | 41472215  | 41476562  | 10 | 4347 | NA | 4  | 6  | NA | NA | NA |
| Bladder-TCC    | 4838b5a9-968c-4178-bffb-3fafa1f6dc09 | 19 | 48692297  | 48695510  | 17 | 3213 | 2  | 5  | 10 | NA | NA | NA |
| Lung-SCC       | 48f68f73-3ac0-44ac-ba12-b8889fcb7f38 | 1  | 76338972  | 76342730  | 22 | 3758 | 2  | 7  | 13 | NA | NA | NA |
| Uterus-AdenoCA | 493e7008-551c-4c0e-b567-a0f31868629e | 6  | 57575541  | 57577745  | 8  | 2204 | 2  | 5  | 1  | NA | NA | NA |
| Uterus-AdenoCA | 493e7008-551c-4c0e-b567-a0f31868629e | 7  | 69131232  | 69131537  | 6  | 305  | 1  | 4  | 1  | NA | NA | NA |
| Uterus-AdenoCA | 493e7008-551c-4c0e-b567-a0f31868629e | 11 | 58427294  | 58428052  | 9  | 758  | 3  | 1  | 5  | NA | NA | NA |
| Uterus-AdenoCA | 493e7008-551c-4c0e-b567-a0f31868629e | 18 | 60775123  | 60775477  | 8  | 354  | 1  | 5  | 2  | NA | NA | NA |
| Uterus-AdenoCA | 493e7008-551c-4c0e-b567-a0f31868629e | 19 | 10984629  | 10985178  | 9  | 549  | 3  | 4  | 2  | NA | NA | NA |
| Uterus-AdenoCA | 493e7008-551c-4c0e-b567-a0f31868629e | 19 | 32132317  | 32134746  | 10 | 2429 | 5  | 5  | NA | NA | NA | NA |
| Liver-HCC      | 49795e42-c623-11e3-bf01-24c6515278c0 | 8  | 76610133  | 76610631  | 9  | 498  | NA | NA | NA | 3  | 5  | 1  |
| Liver-HCC      | 49795e42-c623-11e3-bf01-24c6515278c0 | 13 | 69552010  | 69553002  | 6  | 992  | 1  | NA | NA | 3  | 2  | NA |
| Liver-HCC      | 49795e42-c623-11e3-bf01-24c6515278c0 | 14 | 83097689  | 83100066  | 7  | 2377 | 1  | NA | 2  | 2  | 1  | 1  |
| CNS-Medullo    | 49fa7e44-c86f-4b1f-8849-e5fe5b9de734 | 5  | 105723921 | 105724812 | 7  | 891  | NA | NA | NA | 4  | 1  | 2  |
| CNS-Medullo    | 49fa7e44-c86f-4b1f-8849-e5fe5b9de734 | X  | 30036749  | 30041485  | 7  | 4736 | NA | NA | 1  | 6  | NA | NA |
| Lymph-BNHL     | 4a4309b0-2aca-4d6a-ac50-039b28406bba | 2  | 89158082  | 89160064  | 38 | 1982 | 1  | 3  | 7  | 15 | 4  | 8  |
| Lymph-BNHL     | 4a4309b0-2aca-4d6a-ac50-039b28406bba | 3  | 187462535 | 187463008 | 6  | 473  | NA | 1  | 4  | 1  | NA | NA |
| Lymph-BNHL     | 4a4309b0-2aca-4d6a-ac50-039b28406bba | 14 | 106210965 | 106213873 | 14 | 2908 | 1  | 4  | 9  | NA | NA | NA |

|                |                                      |    |           |           |     |       |    |    |    |    |    |    |
|----------------|--------------------------------------|----|-----------|-----------|-----|-------|----|----|----|----|----|----|
| Lymph-BNHL     | 4a4309b0-2aca-4d6a-ac50-039b28406bba | 14 | 106323403 | 106330170 | 102 | 6767  | 5  | 16 | 43 | 19 | 8  | 11 |
| Lymph-BNHL     | 4a4309b0-2aca-4d6a-ac50-039b28406bba | 14 | 106994233 | 106994549 | 12  | 316   | NA | NA | 4  | 7  | 1  | NA |
| Panc-AdenoCA   | 4a88981e-e409-440f-9bf0-71ca1bab8b4e | 6  | 68000688  | 68001507  | 12  | 819   | NA | NA | 12 | NA | NA | NA |
| Panc-AdenoCA   | 4aa7eabc-0419-4897-b7af-5dcccfd6ac2f | 8  | 129067308 | 129068394 | 10  | 1086  | 3  | 2  | 5  | NA | NA | NA |
| Panc-AdenoCA   | 4aa7eabc-0419-4897-b7af-5dcccfd6ac2f | 8  | 130898430 | 130899062 | 7   | 632   | NA | 1  | 5  | NA | NA | 1  |
| Panc-AdenoCA   | 4aa7eabc-0419-4897-b7af-5dcccfd6ac2f | 12 | 115627780 | 115631204 | 10  | 3424  | 2  | 2  | 6  | NA | NA | NA |
| Panc-AdenoCA   | 4aa7eabc-0419-4897-b7af-5dcccfd6ac2f | 12 | 116552460 | 116555111 | 9   | 2651  | 3  | 2  | 4  | NA | NA | NA |
| Panc-AdenoCA   | 4aa7eabc-0419-4897-b7af-5dcccfd6ac2f | 18 | 1026359   | 1026712   | 6   | 353   | NA | 3  | 3  | NA | NA | NA |
| Lymph-BNHL     | 4adc846a-42cb-4ebd-a954-e31eb29d7572 | 1  | 24699714  | 24700144  | 6   | 430   | NA | NA | 1  | 2  | NA | 3  |
| Lymph-BNHL     | 4adc846a-42cb-4ebd-a954-e31eb29d7572 | 2  | 51356188  | 51357785  | 6   | 1597  | NA | NA | NA | 2  | 2  | 2  |
| Lymph-BNHL     | 4adc846a-42cb-4ebd-a954-e31eb29d7572 | 2  | 69017332  | 69017554  | 7   | 222   | NA | 1  | NA | 2  | 4  | NA |
| Lymph-BNHL     | 4adc846a-42cb-4ebd-a954-e31eb29d7572 | 2  | 82545334  | 82548976  | 7   | 3642  | 1  | 1  | NA | 4  | NA | 1  |
| Lymph-BNHL     | 4adc846a-42cb-4ebd-a954-e31eb29d7572 | 2  | 89140551  | 89146089  | 7   | 5538  | 1  | NA | 1  | 2  | 3  | NA |
| Lymph-BNHL     | 4adc846a-42cb-4ebd-a954-e31eb29d7572 | 2  | 89155330  | 89196264  | 115 | 40934 | 6  | 16 | 11 | 36 | 20 | 26 |
| Lymph-BNHL     | 4adc846a-42cb-4ebd-a954-e31eb29d7572 | 2  | 171329939 | 171330104 | 10  | 165   | NA | NA | NA | 5  | 4  | 1  |
| Lymph-BNHL     | 4adc846a-42cb-4ebd-a954-e31eb29d7572 | 2  | 212350143 | 212359943 | 13  | 9800  | 2  | NA | 2  | 3  | 3  | 3  |
| Lymph-BNHL     | 4adc846a-42cb-4ebd-a954-e31eb29d7572 | 3  | 16551943  | 16556008  | 9   | 4065  | 1  | NA | NA | 6  | 1  | 1  |
| Lymph-BNHL     | 4adc846a-42cb-4ebd-a954-e31eb29d7572 | 3  | 163615728 | 163625306 | 15  | 9578  | NA | 1  | 2  | 6  | 1  | 5  |
| Lymph-BNHL     | 4adc846a-42cb-4ebd-a954-e31eb29d7572 | 3  | 183272476 | 183280194 | 9   | 7718  | NA | NA | 1  | 5  | 2  | 1  |
| Lymph-BNHL     | 4adc846a-42cb-4ebd-a954-e31eb29d7572 | 3  | 187461900 | 187463023 | 8   | 1123  | NA | 3  | 3  | 2  | NA | NA |
| Lymph-BNHL     | 4adc846a-42cb-4ebd-a954-e31eb29d7572 | 4  | 45749428  | 45760109  | 13  | 10681 | 3  | NA | 1  | 4  | 1  | 4  |
| Lymph-BNHL     | 4adc846a-42cb-4ebd-a954-e31eb29d7572 | 4  | 131248679 | 131254792 | 10  | 6113  | 2  | NA | 2  | 4  | NA | 2  |
| Lymph-BNHL     | 4adc846a-42cb-4ebd-a954-e31eb29d7572 | 4  | 182117667 | 182122253 | 7   | 4586  | 1  | NA | NA | 2  | 2  | 2  |
| Lymph-BNHL     | 4adc846a-42cb-4ebd-a954-e31eb29d7572 | 4  | 182630388 | 182635746 | 8   | 5358  | NA | NA | NA | 4  | 3  | 1  |
| Lymph-BNHL     | 4adc846a-42cb-4ebd-a954-e31eb29d7572 | 5  | 117061226 | 117065582 | 6   | 4356  | NA | NA | 1  | 2  | 2  | 1  |
| Lymph-BNHL     | 4adc846a-42cb-4ebd-a954-e31eb29d7572 | 5  | 165042319 | 165048724 | 8   | 6405  | 1  | NA | 2  | 3  | 1  | 1  |
| Lymph-BNHL     | 4adc846a-42cb-4ebd-a954-e31eb29d7572 | 6  | 45918604  | 45921608  | 6   | 3004  | 1  | NA | 1  | NA | 1  | 3  |
| Lymph-BNHL     | 4adc846a-42cb-4ebd-a954-e31eb29d7572 | 6  | 45935301  | 45941013  | 7   | 5712  | NA | 2  | 1  | 3  | NA | 1  |
| Lymph-BNHL     | 4adc846a-42cb-4ebd-a954-e31eb29d7572 | 6  | 67127761  | 67136435  | 11  | 8674  | 1  | 1  | 1  | 6  | 1  | 1  |
| Lymph-BNHL     | 4adc846a-42cb-4ebd-a954-e31eb29d7572 | 6  | 84723597  | 84724785  | 9   | 1188  | NA | NA | 1  | 4  | 1  | 3  |
| Lymph-BNHL     | 4adc846a-42cb-4ebd-a954-e31eb29d7572 | 6  | 120879101 | 120882173 | 9   | 3072  | 1  | 2  | 1  | 1  | 1  | 3  |
| Lymph-BNHL     | 4adc846a-42cb-4ebd-a954-e31eb29d7572 | 6  | 134489432 | 134497081 | 22  | 7649  | 2  | 4  | 13 | 2  | 1  | NA |
| Lymph-BNHL     | 4adc846a-42cb-4ebd-a954-e31eb29d7572 | 8  | 1725610   | 1725694   | 9   | 84    | NA | NA | NA | 5  | 1  | 3  |
| Lymph-BNHL     | 4adc846a-42cb-4ebd-a954-e31eb29d7572 | 8  | 8598956   | 8602936   | 8   | 3980  | 1  | 2  | NA | 2  | 1  | 2  |
| Lymph-BNHL     | 4adc846a-42cb-4ebd-a954-e31eb29d7572 | 8  | 112724276 | 112732024 | 10  | 7748  | 1  | NA | 3  | NA | 1  | 5  |
| Lymph-BNHL     | 4adc846a-42cb-4ebd-a954-e31eb29d7572 | 9  | 23235768  | 23237145  | 7   | 1377  | 1  | NA | NA | 2  | 1  | 3  |
| Lymph-BNHL     | 4adc846a-42cb-4ebd-a954-e31eb29d7572 | 10 | 58302458  | 58302905  | 6   | 447   | NA | 1  | NA | NA | 1  | 4  |
| Lymph-BNHL     | 4adc846a-42cb-4ebd-a954-e31eb29d7572 | 11 | 22295210  | 22302122  | 17  | 6912  | 1  | 1  | 1  | 5  | 3  | 6  |
| Lymph-BNHL     | 4adc846a-42cb-4ebd-a954-e31eb29d7572 | 12 | 90041778  | 90041891  | 7   | 113   | NA | NA | NA | 3  | 1  | 3  |
| Lymph-BNHL     | 4adc846a-42cb-4ebd-a954-e31eb29d7572 | 13 | 64632911  | 64642059  | 12  | 9148  | NA | NA | 1  | 3  | 4  | 4  |
| Lymph-BNHL     | 4adc846a-42cb-4ebd-a954-e31eb29d7572 | 13 | 69749723  | 69753577  | 7   | 3854  | NA | NA | 1  | 3  | 2  | 1  |
| Lymph-BNHL     | 4adc846a-42cb-4ebd-a954-e31eb29d7572 | 14 | 96179985  | 96180327  | 6   | 342   | NA | NA | 1  | 1  | 1  | 3  |
| Lymph-BNHL     | 4adc846a-42cb-4ebd-a954-e31eb29d7572 | 14 | 106237301 | 106242978 | 7   | 5677  | NA | 2  | 3  | 1  | NA | 1  |
| Lymph-BNHL     | 4adc846a-42cb-4ebd-a954-e31eb29d7572 | 14 | 106326832 | 106376573 | 77  | 49741 | 8  | 8  | 24 | 20 | 9  | 8  |
| Lymph-BNHL     | 4adc846a-42cb-4ebd-a954-e31eb29d7572 | 14 | 107219060 | 107259302 | 42  | 40242 | 2  | 9  | 4  | 8  | 15 | 4  |
| Lymph-BNHL     | 4adc846a-42cb-4ebd-a954-e31eb29d7572 | 15 | 65995413  | 65995646  | 8   | 233   | NA | NA | NA | 4  | NA | 4  |
| Lymph-BNHL     | 4adc846a-42cb-4ebd-a954-e31eb29d7572 | 17 | 57915821  | 57917269  | 6   | 1448  | NA | 1  | 3  | 2  | NA | NA |
| Lymph-BNHL     | 4adc846a-42cb-4ebd-a954-e31eb29d7572 | 18 | 1819264   | 1829590   | 12  | 10326 | NA | 1  | 1  | 1  | 3  | 6  |
| Lymph-BNHL     | 4adc846a-42cb-4ebd-a954-e31eb29d7572 | 22 | 22785972  | 22786624  | 19  | 652   | 3  | 5  | 3  | 6  | 2  | NA |
| Lymph-BNHL     | 4adc846a-42cb-4ebd-a954-e31eb29d7572 | 22 | 23199016  | 23199562  | 7   | 546   | NA | NA | NA | 2  | 3  | 2  |
| Lymph-BNHL     | 4adc846a-42cb-4ebd-a954-e31eb29d7572 | 22 | 23207713  | 23210198  | 8   | 2485  | NA | NA | NA | 6  | 1  | 1  |
| Lymph-BNHL     | 4adc846a-42cb-4ebd-a954-e31eb29d7572 | 22 | 23223168  | 23246529  | 42  | 23361 | NA | 8  | 11 | 17 | 1  | 5  |
| Lymph-BNHL     | 4adc846a-42cb-4ebd-a954-e31eb29d7572 | X  | 12993451  | 12994235  | 6   | 784   | 1  | 3  | 1  | NA | NA | 1  |
| Lymph-BNHL     | 4adc846a-42cb-4ebd-a954-e31eb29d7572 | X  | 26451821  | 26455790  | 8   | 3969  | 1  | NA | NA | 1  | 3  | 3  |
| Lymph-BNHL     | 4adc846a-42cb-4ebd-a954-e31eb29d7572 | X  | 93224630  | 93232178  | 9   | 7548  | NA | NA | NA | 3  | 2  | 4  |
| Panc-Endocrine | 4b5d9d8c-ff95-45f4-9287-2804e8a98ade | X  | 88458905  | 88460722  | 6   | 1817  | 1  | 1  | 3  | NA | 1  | NA |
| Liver-HCC      | 4b8943be-c623-11e3-bf01-24c6515278c0 | 6  | 64969074  | 64971178  | 9   | 2104  | 1  | 4  | 3  | 1  | NA | NA |
| Liver-HCC      | 4b8943be-c623-11e3-bf01-24c6515278c0 | 6  | 73171997  | 73174458  | 10  | 2461  | 2  | 4  | 4  | NA | NA | NA |
| Liver-HCC      | 4b8943be-c623-11e3-bf01-24c6515278c0 | 7  | 83509255  | 83512108  | 11  | 2853  | 1  | 5  | 5  | NA | NA | NA |
| Panc-AdenoCA   | 4c027164-12de-456f-b933-6bc91f70b46f | 7  | 63707234  | 63707285  | 7   | 51    | NA | 1  | NA | 5  | 1  | NA |

|               |                                      |    |           |           |    |       |    |    |    |    |    |    |
|---------------|--------------------------------------|----|-----------|-----------|----|-------|----|----|----|----|----|----|
| Panc-AdenoCA  | 4c027164-12de-456f-b933-6bc91f70b46f | 12 | 4636562   | 4636834   | 8  | 272   | 2  | 5  | 1  | NA | NA | NA |
| Panc-AdenoCA  | 4c027164-12de-456f-b933-6bc91f70b46f | 12 | 5097035   | 5097754   | 18 | 719   | 1  | 4  | 13 | NA | NA | NA |
| Panc-AdenoCA  | 4c027164-12de-456f-b933-6bc91f70b46f | 12 | 25832195  | 25837013  | 8  | 4818  | NA | 3  | 5  | NA | NA | NA |
| Panc-AdenoCA  | 4c027164-12de-456f-b933-6bc91f70b46f | 12 | 25929689  | 25930292  | 9  | 603   | NA | 3  | 6  | NA | NA | NA |
| Panc-AdenoCA  | 4c027164-12de-456f-b933-6bc91f70b46f | 12 | 30454498  | 30455599  | 9  | 1101  | NA | 3  | 6  | NA | NA | NA |
| Panc-AdenoCA  | 4c027164-12de-456f-b933-6bc91f70b46f | 12 | 40534195  | 40534434  | 8  | 239   | 3  | 2  | 3  | NA | NA | NA |
| Panc-AdenoCA  | 4c027164-12de-456f-b933-6bc91f70b46f | 12 | 61099550  | 61099908  | 9  | 358   | NA | 4  | 4  | 1  | NA | NA |
| Panc-AdenoCA  | 4c027164-12de-456f-b933-6bc91f70b46f | 12 | 74036778  | 74037284  | 9  | 506   | 3  | 2  | 4  | NA | NA | NA |
| Panc-AdenoCA  | 4c027164-12de-456f-b933-6bc91f70b46f | 17 | 25365973  | 25368365  | 10 | 2392  | 2  | 1  | 7  | NA | NA | NA |
| Panc-AdenoCA  | 4c027164-12de-456f-b933-6bc91f70b46f | 17 | 53778136  | 53781952  | 11 | 3816  | 1  | 5  | 5  | NA | NA | NA |
| Panc-AdenoCA  | 4c027164-12de-456f-b933-6bc91f70b46f | 17 | 61548363  | 61557970  | 21 | 9607  | 2  | 4  | 15 | NA | NA | NA |
| Panc-AdenoCA  | 4c4aa1b1-fda3-4c5b-b588-68aa727500ad | 9  | 34590673  | 34591394  | 6  | 721   | 2  | 1  | 3  | NA | NA | NA |
| Panc-AdenoCA  | 4c4aa1b1-fda3-4c5b-b588-68aa727500ad | 13 | 74304030  | 74305019  | 10 | 989   | NA | 3  | 7  | NA | NA | NA |
| Panc-AdenoCA  | 4c4aa1b1-fda3-4c5b-b588-68aa727500ad | 13 | 115103418 | 115105807 | 22 | 2389  | 2  | 8  | 12 | NA | NA | NA |
| Panc-AdenoCA  | 4c4aa1b1-fda3-4c5b-b588-68aa727500ad | 18 | 23752350  | 23752834  | 6  | 484   | NA | NA | 6  | NA | NA | NA |
| Prost-AdenoCA | 4c5228b5-bf31-4abd-a47c-d088e16dba13 | 3  | 60759903  | 60763804  | 6  | 3901  | NA | 5  | 1  | NA | NA | NA |
| Bone-Leiomyo  | 4c59fb2d-21b6-4b09-8174-6102de736e4d | 1  | 11213694  | 11218366  | 11 | 4672  | 4  | 3  | 4  | NA | NA | NA |
| Bone-Leiomyo  | 4c59fb2d-21b6-4b09-8174-6102de736e4d | 1  | 56129453  | 56130363  | 9  | 910   | NA | NA | NA | 9  | NA | NA |
| Bone-Leiomyo  | 4c59fb2d-21b6-4b09-8174-6102de736e4d | 1  | 158624312 | 158635241 | 19 | 10929 | 2  | 8  | 9  | NA | NA | NA |
| Bone-Leiomyo  | 4c59fb2d-21b6-4b09-8174-6102de736e4d | 1  | 160549762 | 160551276 | 10 | 1514  | 2  | 4  | 4  | NA | NA | NA |
| Bone-Leiomyo  | 4c59fb2d-21b6-4b09-8174-6102de736e4d | 1  | 166539910 | 166551791 | 13 | 11881 | 2  | 7  | 4  | NA | NA | NA |
| Bone-Leiomyo  | 4c59fb2d-21b6-4b09-8174-6102de736e4d | 1  | 167094167 | 167099291 | 7  | 5124  | 2  | 4  | 1  | NA | NA | NA |
| Bone-Leiomyo  | 4c59fb2d-21b6-4b09-8174-6102de736e4d | 1  | 169760330 | 169760597 | 8  | 267   | 1  | 4  | 3  | NA | NA | NA |
| Bone-Leiomyo  | 4c59fb2d-21b6-4b09-8174-6102de736e4d | 1  | 170419621 | 170423222 | 15 | 3601  | 3  | 10 | 2  | NA | NA | NA |
| Bone-Leiomyo  | 4c59fb2d-21b6-4b09-8174-6102de736e4d | 3  | 76924     | 80808     | 10 | 3884  | 1  | 6  | 3  | NA | NA | NA |
| Bone-Leiomyo  | 4c59fb2d-21b6-4b09-8174-6102de736e4d | 3  | 28847130  | 28850139  | 12 | 3009  | 3  | 5  | 4  | NA | NA | NA |
| Bone-Leiomyo  | 4c59fb2d-21b6-4b09-8174-6102de736e4d | 5  | 319893    | 321352    | 6  | 1459  | 2  | 3  | 1  | NA | NA | NA |
| Bone-Leiomyo  | 4c59fb2d-21b6-4b09-8174-6102de736e4d | 5  | 1496841   | 1498821   | 7  | 1980  | 1  | 5  | NA | NA | NA | 1  |
| Bone-Leiomyo  | 4c59fb2d-21b6-4b09-8174-6102de736e4d | 5  | 4472912   | 4477014   | 8  | 4102  | 3  | 4  | 1  | NA | NA | NA |
| Bone-Leiomyo  | 4c59fb2d-21b6-4b09-8174-6102de736e4d | 5  | 4687243   | 4688486   | 7  | 1243  | NA | 4  | 3  | NA | NA | NA |
| Bone-Leiomyo  | 4c59fb2d-21b6-4b09-8174-6102de736e4d | 5  | 22575775  | 22577777  | 9  | 2002  | 3  | 2  | 4  | NA | NA | NA |
| Bone-Leiomyo  | 4c59fb2d-21b6-4b09-8174-6102de736e4d | 5  | 25740340  | 25742644  | 9  | 2304  | 1  | 3  | 5  | NA | NA | NA |
| Bone-Leiomyo  | 4c59fb2d-21b6-4b09-8174-6102de736e4d | 5  | 39110268  | 39111369  | 8  | 1101  | 1  | 5  | 2  | NA | NA | NA |
| Bone-Leiomyo  | 4c59fb2d-21b6-4b09-8174-6102de736e4d | 7  | 122447349 | 122457300 | 11 | 9951  | 2  | 5  | 4  | NA | NA | NA |
| Bone-Leiomyo  | 4c59fb2d-21b6-4b09-8174-6102de736e4d | 7  | 126472804 | 126502363 | 31 | 29559 | 3  | 16 | 10 | 1  | 1  | NA |
| Bone-Leiomyo  | 4c59fb2d-21b6-4b09-8174-6102de736e4d | 7  | 126707872 | 126712024 | 8  | 4152  | 3  | 3  | 2  | NA | NA | NA |
| Bone-Leiomyo  | 4c59fb2d-21b6-4b09-8174-6102de736e4d | 7  | 130335065 | 130337752 | 7  | 2687  | NA | 4  | 3  | NA | NA | NA |
| Bone-Leiomyo  | 4c59fb2d-21b6-4b09-8174-6102de736e4d | 7  | 130810133 | 130812737 | 10 | 2604  | 1  | 6  | 3  | NA | NA | NA |
| Bone-Leiomyo  | 4c59fb2d-21b6-4b09-8174-6102de736e4d | 8  | 24880554  | 24881840  | 11 | 1286  | 2  | 2  | 7  | NA | NA | NA |
| Bone-Leiomyo  | 4c59fb2d-21b6-4b09-8174-6102de736e4d | 9  | 27631906  | 27657697  | 53 | 25791 | NA | NA | 52 | 1  | NA | NA |
| Bone-Leiomyo  | 4c59fb2d-21b6-4b09-8174-6102de736e4d | 12 | 60999775  | 61009630  | 12 | 9855  | 2  | 8  | 1  | NA | 1  | NA |
| Bone-Leiomyo  | 4c59fb2d-21b6-4b09-8174-6102de736e4d | 12 | 61510094  | 61516053  | 18 | 5959  | 3  | 8  | 5  | NA | NA | 2  |
| Bone-Leiomyo  | 4c59fb2d-21b6-4b09-8174-6102de736e4d | 12 | 61572748  | 61575219  | 7  | 2471  | NA | 5  | 2  | NA | NA | NA |
| Bone-Leiomyo  | 4c59fb2d-21b6-4b09-8174-6102de736e4d | 12 | 61592826  | 61596299  | 9  | 3473  | 1  | 3  | 5  | NA | NA | NA |
| Bone-Leiomyo  | 4c59fb2d-21b6-4b09-8174-6102de736e4d | 12 | 62674043  | 62678116  | 29 | 4073  | 2  | 20 | 6  | 1  | NA | NA |
| Bone-Leiomyo  | 4c59fb2d-21b6-4b09-8174-6102de736e4d | 12 | 65468286  | 65474708  | 11 | 6422  | 4  | 6  | 1  | NA | NA | NA |
| Bone-Leiomyo  | 4c59fb2d-21b6-4b09-8174-6102de736e4d | 12 | 65808746  | 65812444  | 7  | 3698  | NA | 5  | 1  | NA | NA | 1  |
| Bone-Leiomyo  | 4c59fb2d-21b6-4b09-8174-6102de736e4d | 12 | 70984833  | 70988329  | 7  | 3496  | 1  | 4  | 2  | NA | NA | NA |
| Bone-Leiomyo  | 4c59fb2d-21b6-4b09-8174-6102de736e4d | 12 | 104930540 | 104940032 | 11 | 9492  | 3  | 6  | 1  | NA | NA | 1  |
| Bone-Leiomyo  | 4c59fb2d-21b6-4b09-8174-6102de736e4d | 13 | 53934191  | 53938322  | 11 | 4131  | 2  | 6  | 3  | NA | NA | NA |
| Bone-Leiomyo  | 4c59fb2d-21b6-4b09-8174-6102de736e4d | 13 | 113802308 | 113804881 | 10 | 2573  | NA | NA | 10 | NA | NA | NA |
| Bone-Leiomyo  | 4c59fb2d-21b6-4b09-8174-6102de736e4d | 14 | 48677483  | 48678722  | 9  | 1239  | 1  | 4  | 4  | NA | NA | NA |
| Bone-Leiomyo  | 4c59fb2d-21b6-4b09-8174-6102de736e4d | 14 | 69959463  | 69964450  | 14 | 4987  | 2  | 4  | 8  | NA | NA | NA |
| Bone-Leiomyo  | 4c59fb2d-21b6-4b09-8174-6102de736e4d | 14 | 73237526  | 73238893  | 7  | 1367  | 1  | 4  | 2  | NA | NA | NA |
| Bone-Leiomyo  | 4c59fb2d-21b6-4b09-8174-6102de736e4d | 17 | 27256167  | 27264652  | 11 | 8485  | 3  | 7  | 1  | NA | NA | NA |
| Bone-Leiomyo  | 4c59fb2d-21b6-4b09-8174-6102de736e4d | 17 | 61253689  | 61255353  | 9  | 1664  | 2  | 5  | 2  | NA | NA | NA |
| Bone-Leiomyo  | 4c59fb2d-21b6-4b09-8174-6102de736e4d | 22 | 34977998  | 34982773  | 13 | 4775  | 2  | 8  | 3  | NA | NA | NA |
| Bone-Leiomyo  | 4c59fb2d-21b6-4b09-8174-6102de736e4d | 22 | 48579152  | 48584987  | 10 | 5835  | NA | 6  | 4  | NA | NA | NA |
| Bone-Leiomyo  | 4c59fb2d-21b6-4b09-8174-6102de736e4d | X  | 39137274  | 39140141  | 7  | 2867  | 1  | 4  | 2  | NA | NA | NA |
| Liver-HCC     | 4c8afa82-c623-11e3-bf01-24c6515278c0 | 4  | 47625351  | 47626167  | 8  | 816   | 1  | 4  | 3  | NA | NA | NA |

|                  |                                      |    |           |           |     |       |    |    |    |    |    |    |    |
|------------------|--------------------------------------|----|-----------|-----------|-----|-------|----|----|----|----|----|----|----|
| Liver-HCC        | 4c8afa82-c623-11e3-bf01-24c6515278c0 | 6  | 151016848 | 151022144 | 11  | 5296  | NA | 11 | NA | NA | NA | NA | NA |
| Panc-AdenoCA     | 4cbe411b-b05e-46bd-bea8-126289a0866c | 2  | 200520067 | 200521886 | 6   | 1819  | NA | 2  | 4  | NA | NA | NA | NA |
| Panc-AdenoCA     | 4cbe411b-b05e-46bd-bea8-126289a0866c | 17 | 15315625  | 15325564  | 15  | 9939  | 3  | 6  | 6  | NA | NA | NA | NA |
| Panc-AdenoCA     | 4cbe411b-b05e-46bd-bea8-126289a0866c | 17 | 16455883  | 16456837  | 8   | 954   | NA | 6  | 2  | NA | NA | NA | NA |
| Panc-AdenoCA     | 4cbe411b-b05e-46bd-bea8-126289a0866c | 18 | 30651910  | 30653807  | 7   | 1897  | 2  | 3  | 2  | NA | NA | NA | NA |
| ColoRect-AdenoCA | 4c9f0aee-6661-478a-8694-9d8ba15e46b7 | 10 | 90128594  | 90130955  | 16  | 2361  | 2  | 4  | 9  | NA | NA | 1  | 1  |
| Liver-HCC        | 4cff8590-559e-4204-8635-96e11bfeda68 | 5  | 22229486  | 22231814  | 6   | 2328  | 1  | NA | 5  | NA | NA | NA | NA |
| Liver-HCC        | 4cff8590-559e-4204-8635-96e11bfeda68 | 5  | 53795385  | 53800837  | 15  | 5452  | 1  | 6  | 8  | NA | NA | NA | NA |
| Liver-HCC        | 4cff8590-559e-4204-8635-96e11bfeda68 | 5  | 151523030 | 151527348 | 10  | 4318  | NA | 3  | 6  | NA | NA | 1  | 1  |
| Prost-AdenoCA    | 4d11d7da-1204-437e-87b1-e8337a67c9a8 | 8  | 42776204  | 42780177  | 14  | 3973  | 1  | 8  | 5  | NA | NA | NA | NA |
| Breast-AdenoCa   | 4d409156-3a36-4c63-9ad6-b6af34f27b06 | 1  | 156012093 | 156013281 | 9   | 1188  | NA | 4  | 5  | NA | NA | NA | NA |
| Breast-AdenoCa   | 4d409156-3a36-4c63-9ad6-b6af34f27b06 | 1  | 178974917 | 178975779 | 11  | 862   | NA | 4  | 7  | NA | NA | NA | NA |
| Breast-AdenoCa   | 4d409156-3a36-4c63-9ad6-b6af34f27b06 | 2  | 11149839  | 11151909  | 10  | 2070  | NA | 2  | 8  | NA | NA | NA | NA |
| Breast-AdenoCa   | 4d409156-3a36-4c63-9ad6-b6af34f27b06 | 17 | 37135421  | 37136828  | 12  | 1407  | NA | 6  | 6  | NA | NA | NA | NA |
| Breast-AdenoCa   | 4d409156-3a36-4c63-9ad6-b6af34f27b06 | 17 | 57526420  | 57527045  | 11  | 625   | NA | 5  | 6  | NA | NA | NA | NA |
| Breast-AdenoCa   | 4d409156-3a36-4c63-9ad6-b6af34f27b06 | 17 | 68231853  | 68241345  | 24  | 9492  | 8  | 6  | 9  | NA | 1  | NA | NA |
| Bone-Leiomyo     | 4d4eff82-ede0-4711-b49a-ada025952114 | 1  | 41551039  | 41553534  | 16  | 2495  | 1  | 9  | 6  | NA | NA | NA | NA |
| Bone-Leiomyo     | 4d4eff82-ede0-4711-b49a-ada025952114 | 5  | 26888554  | 26897034  | 24  | 8480  | 1  | 16 | 7  | NA | NA | NA | NA |
| Bone-Leiomyo     | 4d4eff82-ede0-4711-b49a-ada025952114 | 14 | 107063043 | 107063195 | 7   | 152   | NA | 2  | 5  | NA | NA | NA | NA |
| Bone-Leiomyo     | 4d4eff82-ede0-4711-b49a-ada025952114 | X  | 142748866 | 142749793 | 6   | 927   | 3  | 3  | NA | NA | NA | NA | NA |
| Lymph-BNHL       | 4d72d06d-b6af-4294-9eef-6e61e067761f | 2  | 89139603  | 89142041  | 6   | 2438  | NA | 1  | 2  | 1  | 2  | NA | NA |
| Lymph-BNHL       | 4d72d06d-b6af-4294-9eef-6e61e067761f | 2  | 89159090  | 89185697  | 126 | 26607 | 6  | 13 | 19 | 41 | 24 | 23 | 23 |
| Lymph-BNHL       | 4d72d06d-b6af-4294-9eef-6e61e067761f | 3  | 4033702   | 4038220   | 6   | 4518  | NA | NA | 1  | 5  | NA | NA | NA |
| Lymph-BNHL       | 4d72d06d-b6af-4294-9eef-6e61e067761f | 3  | 187460839 | 187463940 | 15  | 3101  | 1  | NA | 4  | 5  | 3  | 2  | 2  |
| Lymph-BNHL       | 4d72d06d-b6af-4294-9eef-6e61e067761f | 4  | 92284053  | 92289108  | 10  | 5055  | 2  | 1  | 3  | 1  | 2  | 1  | 1  |
| Lymph-BNHL       | 4d72d06d-b6af-4294-9eef-6e61e067761f | 5  | 45172968  | 45180725  | 13  | 7757  | 1  | NA | 4  | 3  | 3  | 2  | 2  |
| Lymph-BNHL       | 4d72d06d-b6af-4294-9eef-6e61e067761f | 6  | 23008508  | 23016315  | 9   | 7807  | 1  | NA | 2  | 3  | 1  | 2  | 2  |
| Lymph-BNHL       | 4d72d06d-b6af-4294-9eef-6e61e067761f | 8  | 47458041  | 47476075  | 20  | 18034 | 2  | 1  | 3  | 5  | 5  | 4  | 4  |
| Lymph-BNHL       | 4d72d06d-b6af-4294-9eef-6e61e067761f | 9  | 13444281  | 13448858  | 8   | 4577  | 1  | 1  | 1  | 1  | NA | 4  | 4  |
| Lymph-BNHL       | 4d72d06d-b6af-4294-9eef-6e61e067761f | 10 | 19842670  | 19845492  | 6   | 2822  | 2  | NA | NA | 1  | 2  | 1  | 1  |
| Lymph-BNHL       | 4d72d06d-b6af-4294-9eef-6e61e067761f | 13 | 54371766  | 54375829  | 6   | 4063  | 3  | NA | NA | 2  | NA | 1  | 1  |
| Lymph-BNHL       | 4d72d06d-b6af-4294-9eef-6e61e067761f | 14 | 106112507 | 106114416 | 11  | 1909  | 2  | 1  | 6  | 1  | NA | 1  | 1  |
| Lymph-BNHL       | 4d72d06d-b6af-4294-9eef-6e61e067761f | 14 | 106325233 | 106330442 | 93  | 5209  | 8  | 23 | 29 | 14 | 10 | 9  | 9  |
| Lymph-BNHL       | 4d72d06d-b6af-4294-9eef-6e61e067761f | 14 | 106725483 | 106733306 | 28  | 7823  | 1  | 3  | 10 | 4  | 8  | 2  | 2  |
| Lymph-BNHL       | 4d72d06d-b6af-4294-9eef-6e61e067761f | 18 | 60827704  | 60828642  | 6   | 938   | NA | NA | 2  | 2  | 1  | 1  | 1  |
| Lymph-BNHL       | 4d72d06d-b6af-4294-9eef-6e61e067761f | 18 | 60984301  | 60988353  | 50  | 4052  | NA | 7  | 13 | 15 | 9  | 6  | 6  |
| Lymph-BNHL       | 4d72d06d-b6af-4294-9eef-6e61e067761f | 22 | 19638017  | 19638152  | 6   | 135   | NA | NA | NA | 1  | 1  | 4  | 4  |
| Lymph-BNHL       | 4d72d06d-b6af-4294-9eef-6e61e067761f | 22 | 23223177  | 23233030  | 30  | 9853  | 2  | 2  | 8  | 7  | 4  | 7  | 7  |
| Lymph-BNHL       | 4d72d06d-b6af-4294-9eef-6e61e067761f | X  | 9592114   | 9592321   | 6   | 207   | NA | 1  | NA | 2  | NA | 3  | 3  |
| Liver-HCC        | 4dac9498-c623-11e3-bf01-24c6515278c0 | Y  | 8680933   | 8681285   | 7   | 352   | NA | 6  | 1  | NA | NA | NA | NA |
| Panc-AdenoCA     | 4db9e471-0068-4ec6-9bcb-33ef5fdec33e | 6  | 48248584  | 48249501  | 7   | 917   | 1  | 3  | 3  | NA | NA | NA | NA |
| Panc-AdenoCA     | 4db9e471-0068-4ec6-9bcb-33ef5fdec33e | 6  | 62838912  | 62840327  | 9   | 1415  | NA | 4  | 5  | NA | NA | NA | NA |
| Lymph-BNHL       | 4e7e6e1f-c648-446f-bdf6-0b1fcc6dfa83 | 1  | 115601925 | 115603876 | 8   | 1951  | NA | 2  | 3  | 1  | 1  | 1  | 1  |
| Lymph-BNHL       | 4e7e6e1f-c648-446f-bdf6-0b1fcc6dfa83 | 2  | 89157302  | 89197349  | 192 | 40047 | 6  | 30 | 29 | 66 | 32 | 29 | 29 |
| Lymph-BNHL       | 4e7e6e1f-c648-446f-bdf6-0b1fcc6dfa83 | 3  | 187957838 | 187959559 | 10  | 1721  | NA | 2  | 1  | NA | 1  | 6  | 6  |
| Lymph-BNHL       | 4e7e6e1f-c648-446f-bdf6-0b1fcc6dfa83 | 4  | 189462145 | 189465130 | 6   | 2985  | NA | NA | NA | 3  | 3  | NA | NA |
| Lymph-BNHL       | 4e7e6e1f-c648-446f-bdf6-0b1fcc6dfa83 | 7  | 40875800  | 40876453  | 9   | 653   | NA | NA | NA | 7  | 1  | 1  | 1  |
| Lymph-BNHL       | 4e7e6e1f-c648-446f-bdf6-0b1fcc6dfa83 | 14 | 106067876 | 106070788 | 12  | 2912  | 2  | 4  | 6  | NA | NA | NA | NA |
| Lymph-BNHL       | 4e7e6e1f-c648-446f-bdf6-0b1fcc6dfa83 | 14 | 106112488 | 106114288 | 9   | 1800  | 1  | 1  | 7  | NA | NA | NA | NA |
| Lymph-BNHL       | 4e7e6e1f-c648-446f-bdf6-0b1fcc6dfa83 | 14 | 106322351 | 106329878 | 88  | 7527  | 10 | 11 | 35 | 18 | 7  | 7  | 7  |
| Lymph-BNHL       | 4e7e6e1f-c648-446f-bdf6-0b1fcc6dfa83 | 14 | 106994147 | 106994889 | 28  | 742   | 2  | 6  | 4  | 6  | 4  | 6  | 6  |
| Lymph-BNHL       | 4e7e6e1f-c648-446f-bdf6-0b1fcc6dfa83 | 18 | 60984127  | 60988519  | 32  | 4392  | 6  | 5  | 8  | 10 | NA | 3  | 3  |
| Lymph-BNHL       | 4e7e6e1f-c648-446f-bdf6-0b1fcc6dfa83 | 22 | 23198216  | 23199080  | 19  | 864   | 1  | 5  | 6  | 4  | 2  | 1  | 1  |
| Lymph-BNHL       | 4e7e6e1f-c648-446f-bdf6-0b1fcc6dfa83 | 22 | 23223095  | 23232255  | 22  | 9160  | 2  | 3  | 3  | 6  | 1  | 7  | 7  |
| Skin-Melanoma    | 4e8396f7-9506-4401-96b6-bb2e89557d59 | 1  | 147414220 | 147414733 | 6   | 513   | 1  | NA | 5  | NA | NA | NA | NA |
| Skin-Melanoma    | 4e8396f7-9506-4401-96b6-bb2e89557d59 | 2  | 154846620 | 154847066 | 6   | 446   | 1  | NA | 5  | NA | NA | NA | NA |
| Skin-Melanoma    | 4e8396f7-9506-4401-96b6-bb2e89557d59 | 2  | 155106032 | 155110634 | 13  | 4602  | NA | 1  | 10 | 2  | NA | NA | NA |
| Skin-Melanoma    | 4e8396f7-9506-4401-96b6-bb2e89557d59 | 4  | 43115717  | 43118229  | 6   | 2512  | 1  | 2  | 2  | 1  | NA | NA | NA |
| Skin-Melanoma    | 4e8396f7-9506-4401-96b6-bb2e89557d59 | 5  | 103686638 | 103693322 | 8   | 6684  | NA | 7  | 1  | NA | NA | NA | NA |
| Skin-Melanoma    | 4e8396f7-9506-4401-96b6-bb2e89557d59 | 7  | 150134669 | 150134956 | 8   | 287   | 1  | 3  | 4  | NA | NA | NA | NA |

|                 |                                      |    |           |           |    |       |    |    |    |    |    |    |
|-----------------|--------------------------------------|----|-----------|-----------|----|-------|----|----|----|----|----|----|
| Skin-Melanoma   | 4e8396f7-9506-4401-96b6-bb2e89557d59 | 10 | 5474640   | 5476868   | 8  | 2228  | 1  | 2  | 5  | NA | NA | NA |
| Skin-Melanoma   | 4e8396f7-9506-4401-96b6-bb2e89557d59 | 17 | 51694145  | 51698687  | 8  | 4542  | 1  | 2  | 5  | NA | NA | NA |
| Skin-Melanoma   | 4e8396f7-9506-4401-96b6-bb2e89557d59 | 22 | 49807366  | 49812904  | 10 | 5538  | NA | 3  | 7  | NA | NA | NA |
| Breast-AdenoCa  | 4e84eed6-82a8-4e91-b0fd-61ec6ef69ce9 | 1  | 199513764 | 199514016 | 8  | 252   | NA | 6  | 2  | NA | NA | NA |
| Breast-AdenoCa  | 4e84eed6-82a8-4e91-b0fd-61ec6ef69ce9 | 1  | 222467318 | 222471219 | 11 | 3901  | 1  | 6  | 4  | NA | NA | NA |
| Breast-AdenoCa  | 4e84eed6-82a8-4e91-b0fd-61ec6ef69ce9 | 10 | 43739015  | 43740074  | 6  | 1059  | NA | 3  | 2  | 1  | NA | NA |
| Breast-AdenoCa  | 4e84eed6-82a8-4e91-b0fd-61ec6ef69ce9 | 21 | 17182758  | 17183906  | 6  | 1148  | NA | 4  | 2  | NA | NA | NA |
| Breast-AdenoCa  | 4e84eed6-82a8-4e91-b0fd-61ec6ef69ce9 | 21 | 23684100  | 23687645  | 12 | 3545  | NA | 6  | 6  | NA | NA | NA |
| Breast-AdenoCa  | 4e84eed6-82a8-4e91-b0fd-61ec6ef69ce9 | X  | 93227676  | 93230769  | 7  | 3093  | 1  | 2  | 4  | NA | NA | NA |
| Ovary-AdenoCA   | 4e913899-eeb8-4630-ba9d-41a81ced8069 | 1  | 111504534 | 111507690 | 6  | 3156  | NA | 1  | 5  | NA | NA | NA |
| Ovary-AdenoCA   | 4e913899-eeb8-4630-ba9d-41a81ced8069 | 11 | 71791852  | 71792005  | 6  | 153   | NA | 3  | 3  | NA | NA | NA |
| Ovary-AdenoCA   | 4e913899-eeb8-4630-ba9d-41a81ced8069 | 16 | 70474319  | 70480924  | 8  | 6605  | NA | 6  | 2  | NA | NA | NA |
| Liver-HCC       | 4ed52e0c-c623-11e3-bf01-24c6515278c0 | 4  | 11974145  | 11977755  | 7  | 3610  | NA | NA | NA | 1  | 6  | NA |
| Liver-HCC       | 4ed52e0c-c623-11e3-bf01-24c6515278c0 | 5  | 168911103 | 168911858 | 7  | 755   | 1  | 4  | 2  | NA | NA | NA |
| Biliary-AdenoCA | 4ef20a13-f107-4654-adca-fc60b8f5be47 | 2  | 78095184  | 78098172  | 8  | 2988  | 1  | 5  | 2  | NA | NA | NA |
| Biliary-AdenoCA | 4ef20a13-f107-4654-adca-fc60b8f5be47 | 6  | 156432745 | 156440119 | 10 | 7374  | 3  | 1  | 5  | 1  | NA | NA |
| Biliary-AdenoCA | 4ef20a13-f107-4654-adca-fc60b8f5be47 | 14 | 103376674 | 103388898 | 16 | 12224 | 1  | 3  | 12 | NA | NA | NA |
| Biliary-AdenoCA | 4ef20a13-f107-4654-adca-fc60b8f5be47 | X  | 7136176   | 7137089   | 6  | 913   | NA | 5  | 1  | NA | NA | NA |
| Liver-HCC       | 4f1fc78e-733d-4c6e-86b2-dbe1f98c141d | 17 | 10733090  | 10734736  | 7  | 1646  | NA | 1  | NA | 4  | 2  | NA |
| Liver-HCC       | 4f6f48bc-c622-11e3-bf01-24c6515278c0 | 2  | 126650679 | 126652263 | 8  | 1584  | NA | NA | NA | 4  | 3  | 1  |
| Liver-HCC       | 4f6f48bc-c622-11e3-bf01-24c6515278c0 | 6  | 64534566  | 64537405  | 17 | 2839  | 2  | 7  | 8  | NA | NA | NA |
| Ovary-AdenoCA   | 504cdcf5-6721-43ef-b31e-fdf52f0cd9cd | 7  | 11498086  | 11498783  | 10 | 697   | 2  | 2  | 6  | NA | NA | NA |
| Ovary-AdenoCA   | 504cdcf5-6721-43ef-b31e-fdf52f0cd9cd | 13 | 63587141  | 63587848  | 9  | 707   | 1  | 5  | 3  | NA | NA | NA |
| Kidney-RCC      | 50515723-b495-42a9-8750-e3da288bf6a3 | 3  | 73101668  | 73104834  | 7  | 3166  | 2  | 3  | 1  | NA | 1  | NA |
| Kidney-RCC      | 50a5970d-a0cb-4251-8ab0-74ad0e94be9a | 5  | 100033165 | 100035520 | 17 | 2355  | 2  | NA | 15 | NA | NA | NA |
| Kidney-RCC      | 50a5970d-a0cb-4251-8ab0-74ad0e94be9a | 9  | 125939997 | 125943397 | 18 | 3400  | NA | 6  | 12 | NA | NA | NA |
| Biliary-AdenoCA | 50e3a421-9741-4cd8-911b-0f47ca518b6a | 1  | 177068911 | 177075430 | 28 | 6519  | 6  | 8  | 14 | NA | NA | NA |
| Biliary-AdenoCA | 50e3a421-9741-4cd8-911b-0f47ca518b6a | 11 | 69993601  | 69994358  | 18 | 757   | 3  | 6  | 9  | NA | NA | NA |
| Biliary-AdenoCA | 50e3a421-9741-4cd8-911b-0f47ca518b6a | 14 | 40788157  | 40788644  | 7  | 487   | NA | NA | NA | NA | 4  | 3  |
| Biliary-AdenoCA | 50e3a421-9741-4cd8-911b-0f47ca518b6a | 18 | 71004856  | 71005188  | 12 | 332   | NA | NA | 12 | NA | NA | NA |
| Liver-HCC       | 50eb58ba-c623-11e3-bf01-24c6515278c0 | 12 | 73819680  | 73819815  | 8  | 135   | NA | NA | NA | 7  | NA | 1  |
| Liver-HCC       | 50eb58ba-c623-11e3-bf01-24c6515278c0 | 17 | 66896225  | 66900719  | 7  | 4494  | NA | NA | 2  | 3  | 1  | 1  |
| Lymph-CLL       | 513bafce-375c-49b0-ae75-6c607abd05d8 | 22 | 22735434  | 22735666  | 6  | 232   | 2  | 1  | 1  | NA | 2  | NA |
| Panc-AdenoCA    | 51458c86-0fdd-470e-b059-1ffbffc92a7f | 4  | 189472749 | 189475192 | 30 | 2443  | NA | NA | 30 | NA | NA | NA |
| Panc-AdenoCA    | 51458c86-0fdd-470e-b059-1ffbffc92a7f | 5  | 141133524 | 141134309 | 10 | 785   | NA | 4  | 6  | NA | NA | NA |
| Panc-AdenoCA    | 51458c86-0fdd-470e-b059-1ffbffc92a7f | 9  | 74743472  | 74743660  | 7  | 188   | NA | NA | 7  | NA | NA | NA |
| Panc-AdenoCA    | 51458c86-0fdd-470e-b059-1ffbffc92a7f | 12 | 66125976  | 66129404  | 30 | 3428  | 5  | 5  | 20 | NA | NA | NA |
| Panc-AdenoCA    | 51458c86-0fdd-470e-b059-1ffbffc92a7f | 12 | 66158200  | 66162116  | 7  | 3916  | NA | 3  | 4  | NA | NA | NA |
| Panc-AdenoCA    | 51458c86-0fdd-470e-b059-1ffbffc92a7f | 15 | 76702444  | 76709838  | 9  | 7394  | NA | 3  | 5  | NA | NA | 1  |
| Panc-AdenoCA    | 51458c86-0fdd-470e-b059-1ffbffc92a7f | 15 | 99887831  | 99889017  | 15 | 1186  | 2  | 3  | 10 | NA | NA | NA |
| Panc-AdenoCA    | 5187e77d-f412-4303-8049-11d1aa1a0235 | 18 | 48624691  | 48626787  | 13 | 2096  | 1  | 4  | 8  | NA | NA | NA |
| Panc-AdenoCA    | 5187e77d-f412-4303-8049-11d1aa1a0235 | X  | 154439357 | 154443260 | 8  | 3903  | 4  | 1  | 3  | NA | NA | NA |
| Prost-AdenoCA   | 51adf6cf-f422-4d7e-aa46-cc9bf0ef8693 | 3  | 22682003  | 22685156  | 8  | 3153  | NA | 4  | 4  | NA | NA | NA |
| Prost-AdenoCA   | 51adf6cf-f422-4d7e-aa46-cc9bf0ef8693 | 8  | 16270231  | 16274568  | 8  | 4337  | NA | 6  | 2  | NA | NA | NA |
| Prost-AdenoCA   | 51adf6cf-f422-4d7e-aa46-cc9bf0ef8693 | 8  | 103740546 | 103742965 | 14 | 2419  | NA | 8  | 6  | NA | NA | NA |
| Prost-AdenoCA   | 51adf6cf-f422-4d7e-aa46-cc9bf0ef8693 | 17 | 49984485  | 49985160  | 6  | 675   | NA | 3  | 3  | NA | NA | NA |
| Ovary-AdenoCA   | 51b25b37-f75c-4380-a0f6-5273e0b7ee33 | 4  | 15658258  | 15658561  | 6  | 303   | 1  | 1  | 3  | NA | NA | 1  |
| Ovary-AdenoCA   | 51b25b37-f75c-4380-a0f6-5273e0b7ee33 | 8  | 70450394  | 70454758  | 21 | 4364  | 2  | 3  | 16 | NA | NA | NA |
| Liver-HCC       | 520b8ab2-c623-11e3-bf01-24c6515278c0 | 1  | 216808912 | 216812019 | 14 | 3107  | NA | 9  | 5  | NA | NA | NA |
| Bone-Leiomyo    | 522dc834-8367-4f49-b93b-fcba91a2de7e | 3  | 79101294  | 79101359  | 6  | 65    | NA | NA | 6  | NA | NA | NA |
| Skin-Melanoma   | 524bbd14-1e1f-479b-9a71-d27fce32d8bc | 1  | 245128827 | 245141572 | 16 | 12745 | 5  | 4  | 7  | NA | NA | NA |
| Skin-Melanoma   | 524bbd14-1e1f-479b-9a71-d27fce32d8bc | 3  | 89184932  | 89185796  | 7  | 864   | NA | 7  | NA | NA | NA | NA |
| Skin-Melanoma   | 524bbd14-1e1f-479b-9a71-d27fce32d8bc | 5  | 147595501 | 147620674 | 33 | 25173 | 3  | 12 | 18 | NA | NA | NA |
| Skin-Melanoma   | 524bbd14-1e1f-479b-9a71-d27fce32d8bc | 16 | 66100715  | 66104278  | 7  | 3563  | NA | 6  | 1  | NA | NA | NA |
| Skin-Melanoma   | 524bbd14-1e1f-479b-9a71-d27fce32d8bc | 17 | 36106618  | 36108981  | 9  | 2363  | 3  | 1  | 5  | NA | NA | NA |
| Skin-Melanoma   | 524bbd14-1e1f-479b-9a71-d27fce32d8bc | 17 | 43418283  | 43419014  | 8  | 731   | 1  | 4  | 3  | NA | NA | NA |
| Skin-Melanoma   | 524bbd14-1e1f-479b-9a71-d27fce32d8bc | 17 | 43439609  | 43446243  | 31 | 6634  | 4  | 15 | 12 | NA | NA | NA |
| Skin-Melanoma   | 524bbd14-1e1f-479b-9a71-d27fce32d8bc | 17 | 47977134  | 47977372  | 7  | 238   | 2  | 1  | 4  | NA | NA | NA |
| Skin-Melanoma   | 524bbd14-1e1f-479b-9a71-d27fce32d8bc | 17 | 48687636  | 48735234  | 66 | 47598 | 12 | 28 | 24 | NA | 2  | NA |
| Skin-Melanoma   | 524bbd14-1e1f-479b-9a71-d27fce32d8bc | 17 | 50167587  | 50168901  | 12 | 1314  | NA | 3  | 9  | NA | NA | NA |



|                  |                                      |    |           |           |    |       |    |    |    |    |    |    |
|------------------|--------------------------------------|----|-----------|-----------|----|-------|----|----|----|----|----|----|
| Skin-Melanoma    | 524bdd14-1e1f-479b-9a71-d27fce32d8bc | 17 | 52845136  | 52851176  | 20 | 6040  | 2  | 13 | 5  | NA | NA | NA |
| Skin-Melanoma    | 524bdd14-1e1f-479b-9a71-d27fce32d8bc | 17 | 58433544  | 58437848  | 10 | 4304  | 1  | 4  | 5  | NA | NA | NA |
| Skin-Melanoma    | 524bdd14-1e1f-479b-9a71-d27fce32d8bc | 17 | 58490472  | 58490673  | 7  | 201   | NA | NA | 7  | NA | NA | NA |
| Skin-Melanoma    | 524bdd14-1e1f-479b-9a71-d27fce32d8bc | 17 | 59371418  | 59373885  | 12 | 2467  | NA | 6  | 6  | NA | NA | NA |
| Skin-Melanoma    | 524bdd14-1e1f-479b-9a71-d27fce32d8bc | 17 | 61319776  | 61321749  | 8  | 1973  | 4  | 1  | 3  | NA | NA | NA |
| Skin-Melanoma    | 524bdd14-1e1f-479b-9a71-d27fce32d8bc | 17 | 63624051  | 63625194  | 10 | 1143  | 2  | 1  | 7  | NA | NA | NA |
| Skin-Melanoma    | 524bdd14-1e1f-479b-9a71-d27fce32d8bc | 17 | 66729983  | 66730682  | 10 | 699   | 2  | 4  | 4  | NA | NA | NA |
| Skin-Melanoma    | 524bdd14-1e1f-479b-9a71-d27fce32d8bc | 17 | 66893896  | 66900489  | 31 | 6593  | 4  | 11 | 16 | NA | NA | NA |
| Skin-Melanoma    | 524bdd14-1e1f-479b-9a71-d27fce32d8bc | 17 | 67193774  | 67202672  | 19 | 8898  | 3  | 11 | 5  | NA | NA | NA |
| Skin-Melanoma    | 524bdd14-1e1f-479b-9a71-d27fce32d8bc | 17 | 67747913  | 67749585  | 16 | 1672  | 3  | 10 | 3  | NA | NA | NA |
| Skin-Melanoma    | 524bdd14-1e1f-479b-9a71-d27fce32d8bc | 17 | 68724660  | 68725914  | 11 | 1254  | 3  | 4  | 4  | NA | NA | NA |
| Skin-Melanoma    | 524bdd14-1e1f-479b-9a71-d27fce32d8bc | 17 | 69139515  | 69157292  | 35 | 17777 | 8  | 18 | 9  | NA | NA | NA |
| Skin-Melanoma    | 524bdd14-1e1f-479b-9a71-d27fce32d8bc | 17 | 74186616  | 74197194  | 31 | 10578 | 7  | 12 | 12 | NA | NA | NA |
| Panc-AdenoCA     | 5255d645-d3d2-422e-8449-046cd21f4935 | 3  | 195322954 | 195332774 | 14 | 9820  | 7  | 2  | 5  | NA | NA | NA |
| Panc-AdenoCA     | 5255d645-d3d2-422e-8449-046cd21f4935 | 18 | 25195363  | 25199340  | 9  | 3977  | 4  | 2  | 2  | NA | NA | 1  |
| Panc-AdenoCA     | 5255d645-d3d2-422e-8449-046cd21f4935 | 19 | 16816164  | 16828104  | 13 | 11940 | 5  | 2  | 6  | NA | NA | NA |
| Eso-AdenoCa      | 526b3796-2cbd-4eec-8273-064b41456279 | 2  | 237003275 | 237004737 | 6  | 1462  | NA | 3  | 3  | NA | NA | NA |
| Eso-AdenoCa      | 526b3796-2cbd-4eec-8273-064b41456279 | 4  | 168488795 | 168488992 | 6  | 197   | NA | NA | 6  | NA | NA | NA |
| Eso-AdenoCa      | 526b3796-2cbd-4eec-8273-064b41456279 | 13 | 105157491 | 105158469 | 7  | 978   | NA | 3  | 3  | NA | NA | 1  |
| Eso-AdenoCa      | 526b3796-2cbd-4eec-8273-064b41456279 | 20 | 20112095  | 20117549  | 10 | 5454  | 2  | 2  | 6  | NA | NA | NA |
| Lung-AdenoCA     | 52910a60-bb15-4ba5-9d09-50d8ee6a445b | 5  | 62123396  | 62124835  | 10 | 1439  | NA | 7  | 3  | NA | NA | NA |
| Lung-AdenoCA     | 52910a60-bb15-4ba5-9d09-50d8ee6a445b | 8  | 42369229  | 42372329  | 30 | 3100  | NA | 10 | 19 | NA | NA | 1  |
| Lung-AdenoCA     | 52910a60-bb15-4ba5-9d09-50d8ee6a445b | 8  | 43686215  | 43687987  | 28 | 1772  | 3  | 6  | 18 | NA | NA | 1  |
| Panc-AdenoCA     | 52f43b72-15ea-40a0-a3b4-4bf22bc0bf25 | 6  | 69093923  | 69100353  | 27 | 6430  | 1  | 11 | 15 | NA | NA | NA |
| Panc-AdenoCA     | 52f43b72-15ea-40a0-a3b4-4bf22bc0bf25 | 17 | 51856088  | 51856526  | 11 | 438   | NA | 9  | 2  | NA | NA | NA |
| Panc-AdenoCA     | 53534b3c-cd15-4d68-a9b1-6902bb234c45 | 1  | 157101639 | 157102187 | 7  | 548   | NA | 2  | 5  | NA | NA | NA |
| Panc-AdenoCA     | 53534b3c-cd15-4d68-a9b1-6902bb234c45 | 6  | 129193072 | 129194610 | 25 | 1538  | 4  | 17 | 4  | NA | NA | NA |
| Panc-AdenoCA     | 53534b3c-cd15-4d68-a9b1-6902bb234c45 | 8  | 43626482  | 43626948  | 6  | 466   | 3  | 3  | NA | NA | NA | NA |
| Panc-AdenoCA     | 53534b3c-cd15-4d68-a9b1-6902bb234c45 | 8  | 49041231  | 49041608  | 10 | 377   | NA | NA | 10 | NA | NA | NA |
| Panc-AdenoCA     | 53534b3c-cd15-4d68-a9b1-6902bb234c45 | 8  | 49413948  | 49414101  | 8  | 153   | NA | 1  | 7  | NA | NA | NA |
| Panc-AdenoCA     | 53534b3c-cd15-4d68-a9b1-6902bb234c45 | 8  | 68708617  | 68710090  | 14 | 1473  | 3  | 3  | 8  | NA | NA | NA |
| Panc-AdenoCA     | 53534b3c-cd15-4d68-a9b1-6902bb234c45 | 8  | 85533388  | 85534485  | 8  | 1097  | 1  | 6  | 1  | NA | NA | NA |
| Panc-AdenoCA     | 53534b3c-cd15-4d68-a9b1-6902bb234c45 | 15 | 81665932  | 81668107  | 10 | 2175  | 1  | 6  | 3  | NA | NA | NA |
| Panc-AdenoCA     | 53534b3c-cd15-4d68-a9b1-6902bb234c45 | 18 | 33016565  | 33018120  | 23 | 1555  | 1  | 12 | 10 | NA | NA | NA |
| Ovary-AdenoCA    | 53bcb68-addd-47fc-9910-cd1d3f38197d  | 13 | 113484489 | 113490433 | 15 | 5944  | 2  | 3  | 9  | NA | NA | 1  |
| Lung-AdenoCA     | 53d32d8b-5649-42b0-8c52-2c39af2a961b | 8  | 36614508  | 36618864  | 7  | 4356  | NA | 5  | 2  | NA | NA | NA |
| CNS-GBM          | 53dec97d-0464-4ffd-8e2e-95b2b9a03af0 | 7  | 55229542  | 55233043  | 16 | 3501  | 4  | 8  | 4  | NA | NA | NA |
| CNS-GBM          | 53dec97d-0464-4ffd-8e2e-95b2b9a03af0 | 7  | 145443694 | 145445058 | 9  | 1364  | NA | 8  | 1  | NA | NA | NA |
| CNS-GBM          | 53dec97d-0464-4ffd-8e2e-95b2b9a03af0 | 7  | 145490765 | 145491638 | 9  | 873   | NA | 5  | 4  | NA | NA | NA |
| CNS-GBM          | 53dec97d-0464-4ffd-8e2e-95b2b9a03af0 | 7  | 145589491 | 145593536 | 22 | 4045  | 1  | 16 | 5  | NA | NA | NA |
| Liver-HCC        | 53df19a8-c623-11e3-bf01-24c6515278c0 | 19 | 19941598  | 19945304  | 6  | 3706  | NA | 5  | NA | 1  | NA | NA |
| Panc-AdenoCA     | 54195db3-94a9-4538-8bb8-9953d936acd4 | 8  | 145077546 | 145078372 | 8  | 826   | NA | 2  | 5  | 1  | NA | NA |
| Panc-AdenoCA     | 54195db3-94a9-4538-8bb8-9953d936acd4 | 17 | 46952302  | 46952400  | 6  | 98    | NA | NA | 6  | NA | NA | NA |
| Liver-HCC        | 54cfd4b0-c623-11e3-bf01-24c6515278c0 | 5  | 120247005 | 120249616 | 6  | 2611  | 1  | 2  | 1  | 1  | NA | 1  |
| Prost-AdenoCA    | 551d5082-ab6a-4674-af0d-ce408f589949 | 7  | 53516632  | 53516814  | 6  | 182   | NA | NA | NA | 1  | 5  | NA |
| Prost-AdenoCA    | 551d5082-ab6a-4674-af0d-ce408f589949 | 7  | 107545004 | 107546012 | 9  | 1008  | NA | NA | NA | 4  | 5  | NA |
| Ovary-AdenoCA    | 5533240d-8fed-440d-b781-6092785a77ce | 8  | 55294805  | 55298756  | 8  | 3951  | NA | 4  | 4  | NA | NA | NA |
| Ovary-AdenoCA    | 5533240d-8fed-440d-b781-6092785a77ce | 8  | 55377675  | 55378971  | 12 | 1296  | 5  | 5  | 2  | NA | NA | NA |
| ColoRect-AdenoCA | 55345803-83d4-4fdb-b0ee-328753801da1 | 17 | 29232696  | 29233461  | 13 | 765   | 2  | 3  | 8  | NA | NA | NA |
| ColoRect-AdenoCA | 55345803-83d4-4fdb-b0ee-328753801da1 | 17 | 51711603  | 51713138  | 14 | 1535  | 1  | 5  | 8  | NA | NA | NA |
| Uterus-AdenoCA   | 554b9439-7e11-43ec-8bc3-448c59100b9e | 16 | 32480763  | 32482117  | 6  | 1354  | 5  | 1  | NA | NA | NA | NA |
| Uterus-AdenoCA   | 554b9439-7e11-43ec-8bc3-448c59100b9e | 18 | 4921596   | 4924061   | 10 | 2465  | 3  | 4  | 2  | NA | NA | 1  |
| Uterus-AdenoCA   | 554b9439-7e11-43ec-8bc3-448c59100b9e | 18 | 6278413   | 6284247   | 29 | 5834  | 4  | 14 | 11 | NA | NA | NA |
| Uterus-AdenoCA   | 55ada396-0878-4724-8ebe-00da367eed3d | 11 | 63017266  | 63017547  | 7  | 281   | 1  | 2  | 3  | 1  | NA | NA |
| Lymph-CLL        | 55c82198-5be6-4cc5-b5b3-b707af234107 | 2  | 89159347  | 89185520  | 70 | 26173 | 1  | 11 | 9  | 32 | 10 | 7  |
| Lymph-CLL        | 55c82198-5be6-4cc5-b5b3-b707af234107 | 13 | 56757557  | 56760481  | 7  | 2924  | 1  | NA | 1  | 1  | 1  | 3  |
| Lymph-CLL        | 55c82198-5be6-4cc5-b5b3-b707af234107 | 13 | 85463941  | 85470090  | 8  | 6149  | 1  | NA | NA | 1  | 2  | 4  |
| Lymph-CLL        | 55c82198-5be6-4cc5-b5b3-b707af234107 | 14 | 106326444 | 106330146 | 40 | 3702  | 3  | 10 | 4  | 12 | 5  | 6  |
| Lymph-CLL        | 55c82198-5be6-4cc5-b5b3-b707af234107 | 14 | 106379279 | 106382359 | 18 | 3080  | NA | NA | 5  | 11 | 1  | 1  |
| Lymph-CLL        | 55c82198-5be6-4cc5-b5b3-b707af234107 | 14 | 106539205 | 106539681 | 12 | 476   | 1  | NA | 3  | 6  | 2  | NA |

|                 |                                      |    |           |           |    |       |    |    |    |    |    |    |
|-----------------|--------------------------------------|----|-----------|-----------|----|-------|----|----|----|----|----|----|
| Lymph-CLL       | 55c82198-5be6-4cc5-b5b3-b707af234107 | 22 | 23227724  | 23231205  | 10 | 3481  | 1  | 1  | 1  | 3  | 2  | 2  |
| Panc-AdenoCA    | 5650dc4e-8bce-4716-9199-cd5750d7a888 | 10 | 27333171  | 27336616  | 49 | 3445  | NA | NA | 49 | NA | NA | NA |
| Panc-AdenoCA    | 5650dc4e-8bce-4716-9199-cd5750d7a888 | 11 | 33041447  | 33044690  | 8  | 3243  | 2  | 1  | 5  | NA | NA | NA |
| Panc-AdenoCA    | 5650dc4e-8bce-4716-9199-cd5750d7a888 | 11 | 34587834  | 34598174  | 39 | 10340 | 1  | 1  | 37 | NA | NA | NA |
| Panc-AdenoCA    | 5650dc4e-8bce-4716-9199-cd5750d7a888 | 12 | 30229022  | 30232458  | 32 | 3436  | 1  | 8  | 23 | NA | NA | NA |
| Panc-AdenoCA    | 5650dc4e-8bce-4716-9199-cd5750d7a888 | 12 | 77376586  | 77378563  | 17 | 1977  | 2  | 7  | 6  | 1  | 1  | NA |
| Panc-AdenoCA    | 5650dc4e-8bce-4716-9199-cd5750d7a888 | 18 | 18896042  | 18898157  | 12 | 2115  | NA | NA | 12 | NA | NA | NA |
| Panc-AdenoCA    | 5650dc4e-8bce-4716-9199-cd5750d7a888 | 18 | 22147117  | 22147510  | 8  | 393   | NA | NA | 8  | NA | NA | NA |
| Biliary-AdenoCA | 56cc8740-b132-4cbc-b513-f0b5b2305ca6 | 1  | 153237237 | 153248660 | 18 | 11423 | NA | 9  | 8  | NA | 1  | NA |
| Biliary-AdenoCA | 56cc8740-b132-4cbc-b513-f0b5b2305ca6 | 1  | 160986308 | 160991954 | 9  | 5646  | 2  | 6  | 1  | NA | NA | NA |
| Biliary-AdenoCA | 56cc8740-b132-4cbc-b513-f0b5b2305ca6 | 17 | 39784903  | 39788451  | 26 | 3548  | 2  | 6  | 18 | NA | NA | NA |
| Biliary-AdenoCA | 56cc8740-b132-4cbc-b513-f0b5b2305ca6 | 18 | 20031785  | 20036921  | 15 | 5136  | 4  | 7  | 4  | NA | NA | NA |
| Biliary-AdenoCA | 56cc8740-b132-4cbc-b513-f0b5b2305ca6 | 19 | 9664951   | 9670594   | 9  | 5643  | 2  | 6  | 1  | NA | NA | NA |
| Biliary-AdenoCA | 56cc8740-b132-4cbc-b513-f0b5b2305ca6 | 19 | 43672953  | 43673516  | 8  | 563   | 3  | 2  | 3  | NA | NA | NA |
| Biliary-AdenoCA | 56cc8740-b132-4cbc-b513-f0b5b2305ca6 | 19 | 44522567  | 44524959  | 11 | 2392  | 2  | 8  | 1  | NA | NA | NA |
| Skin-Melanoma   | 56ddcb96-e90b-4fce-aa4c-c677bbfee488 | 5  | 3908969   | 3910423   | 12 | 1454  | NA | 6  | 6  | NA | NA | NA |
| Skin-Melanoma   | 56ddcb96-e90b-4fce-aa4c-c677bbfee488 | 5  | 15070805  | 15074697  | 20 | 3892  | 2  | 10 | 6  | 1  | 1  | NA |
| Skin-Melanoma   | 56ddcb96-e90b-4fce-aa4c-c677bbfee488 | 5  | 20484756  | 20489012  | 8  | 4256  | NA | 6  | 2  | NA | NA | NA |
| Skin-Melanoma   | 56ddcb96-e90b-4fce-aa4c-c677bbfee488 | 5  | 35151376  | 35152002  | 8  | 626   | 2  | 3  | 3  | NA | NA | NA |
| Skin-Melanoma   | 56ddcb96-e90b-4fce-aa4c-c677bbfee488 | 5  | 120210904 | 120212882 | 13 | 1978  | 1  | 7  | 4  | 1  | NA | NA |
| Skin-Melanoma   | 56ddcb96-e90b-4fce-aa4c-c677bbfee488 | 7  | 27824708  | 27826099  | 6  | 1391  | NA | 4  | 2  | NA | NA | NA |
| Skin-Melanoma   | 56ddcb96-e90b-4fce-aa4c-c677bbfee488 | 7  | 40679457  | 40684245  | 8  | 4788  | NA | 6  | 2  | NA | NA | NA |
| Skin-Melanoma   | 56ddcb96-e90b-4fce-aa4c-c677bbfee488 | 7  | 48179380  | 48179831  | 9  | 451   | NA | 6  | 3  | NA | NA | NA |
| Skin-Melanoma   | 56ddcb96-e90b-4fce-aa4c-c677bbfee488 | 7  | 54424642  | 54432358  | 11 | 7716  | NA | 6  | 4  | NA | NA | 1  |
| Skin-Melanoma   | 56ddcb96-e90b-4fce-aa4c-c677bbfee488 | 7  | 81480362  | 81480785  | 10 | 423   | 1  | 5  | 4  | NA | NA | NA |
| Lymph-BNHL      | 56e57223-264e-489d-bc9a-a07789065c40 | 4  | 61254862  | 61257670  | 6  | 2808  | NA | 2  | 2  | NA | 1  | 1  |
| Lymph-BNHL      | 56e57223-264e-489d-bc9a-a07789065c40 | 4  | 136343505 | 136360540 | 24 | 17035 | 1  | 1  | 5  | 7  | 3  | 7  |
| Lymph-BNHL      | 56e57223-264e-489d-bc9a-a07789065c40 | 7  | 147085956 | 147086950 | 6  | 994   | NA | NA | NA | 4  | 1  | 1  |
| Lymph-BNHL      | 56e57223-264e-489d-bc9a-a07789065c40 | 12 | 122459308 | 122461118 | 7  | 1810  | NA | 2  | 4  | NA | NA | 1  |
| Lymph-BNHL      | 56e57223-264e-489d-bc9a-a07789065c40 | 14 | 106069180 | 106069963 | 9  | 783   | 1  | 4  | 4  | NA | NA | NA |
| Lymph-BNHL      | 56e57223-264e-489d-bc9a-a07789065c40 | 14 | 106112755 | 106114301 | 10 | 1546  | NA | 2  | 8  | NA | NA | NA |
| Lymph-BNHL      | 56e57223-264e-489d-bc9a-a07789065c40 | 14 | 106237519 | 106241249 | 18 | 3730  | 3  | 4  | 11 | NA | NA | NA |
| Lymph-BNHL      | 56e57223-264e-489d-bc9a-a07789065c40 | 14 | 106322746 | 106329550 | 61 | 6804  | 4  | 9  | 18 | 14 | 3  | 13 |
| Lymph-BNHL      | 56e57223-264e-489d-bc9a-a07789065c40 | 14 | 106829927 | 106831081 | 12 | 1154  | NA | 1  | 2  | 4  | 4  | 1  |
| Lymph-BNHL      | 56e57223-264e-489d-bc9a-a07789065c40 | 18 | 60984007  | 60988535  | 41 | 4528  | 3  | 12 | 16 | 5  | 3  | 2  |
| Lymph-BNHL      | 56e57223-264e-489d-bc9a-a07789065c40 | 22 | 22723412  | 22724243  | 12 | 831   | 1  | 2  | 1  | 5  | 2  | 1  |
| CNS-GBM         | 56ffaa35-814c-4c0b-b3c6-d4514d34fec2 | 11 | 34630518  | 34639323  | 14 | 8805  | NA | 10 | 4  | NA | NA | NA |
| CNS-GBM         | 56ffaa35-814c-4c0b-b3c6-d4514d34fec2 | 11 | 44814196  | 44819019  | 9  | 4823  | NA | 3  | 6  | NA | NA | NA |
| Stomach-AdenoCA | 576a1741-8c65-40da-9f0f-b2ca805d70f3 | 19 | 14181133  | 14181782  | 6  | 649   | NA | NA | 1  | 5  | NA | NA |
| Stomach-AdenoCA | 576a1741-8c65-40da-9f0f-b2ca805d70f3 | X  | 11735241  | 11735437  | 10 | 196   | NA | NA | NA | 10 | NA | NA |
| Lymph-BNHL      | 578ba169-1d2f-4187-b174-082bbc6a5bd2 | 2  | 89158911  | 89160367  | 17 | 1456  | NA | 4  | 3  | 8  | 1  | 1  |
| Lymph-BNHL      | 578ba169-1d2f-4187-b174-082bbc6a5bd2 | 2  | 181485930 | 181487954 | 8  | 2024  | 3  | 2  | 3  | NA | NA | NA |
| Lymph-BNHL      | 578ba169-1d2f-4187-b174-082bbc6a5bd2 | 4  | 183486102 | 183486876 | 6  | 774   | NA | NA | NA | 3  | 1  | 2  |
| Lymph-BNHL      | 578ba169-1d2f-4187-b174-082bbc6a5bd2 | 8  | 128747987 | 128750554 | 19 | 2567  | 4  | 2  | 8  | 4  | NA | 1  |
| Lymph-BNHL      | 578ba169-1d2f-4187-b174-082bbc6a5bd2 | 14 | 106325371 | 106330416 | 78 | 5045  | 6  | 22 | 31 | 12 | 3  | 4  |
| Lymph-BNHL      | 578ba169-1d2f-4187-b174-082bbc6a5bd2 | 14 | 107218834 | 107218986 | 11 | 152   | NA | 1  | 6  | 2  | NA | 2  |
| Lymph-BNHL      | 578ba169-1d2f-4187-b174-082bbc6a5bd2 | 18 | 64277942  | 64280301  | 6  | 2359  | NA | NA | NA | 4  | 1  | 1  |
| Lymph-BNHL      | 578ba169-1d2f-4187-b174-082bbc6a5bd2 | 22 | 23223232  | 23231597  | 18 | 8365  | 1  | 3  | 3  | 6  | 2  | 3  |
| Panc-Endocrine  | 589e0aea-9057-4b8c-8af1-74c74fe46a38 | 3  | 1641727   | 1649310   | 17 | 7583  | NA | 9  | 8  | NA | NA | NA |
| Panc-Endocrine  | 589e0aea-9057-4b8c-8af1-74c74fe46a38 | 20 | 13979678  | 13983885  | 6  | 4207  | 1  | 4  | 1  | NA | NA | NA |
| Panc-Endocrine  | 589e0aea-9057-4b8c-8af1-74c74fe46a38 | 20 | 14957408  | 14958583  | 8  | 1175  | NA | 7  | 1  | NA | NA | NA |
| Skin-Melanoma   | 58d3e932-b4a3-4cac-a6ac-73160e354a15 | 6  | 64132636  | 64135852  | 9  | 3216  | 1  | 8  | NA | NA | NA | NA |
| Skin-Melanoma   | 58d3e932-b4a3-4cac-a6ac-73160e354a15 | 11 | 57998508  | 58002542  | 19 | 4034  | 1  | 13 | 5  | NA | NA | NA |
| Skin-Melanoma   | 58d3e932-b4a3-4cac-a6ac-73160e354a15 | 11 | 69705460  | 69707527  | 7  | 2067  | 1  | NA | 6  | NA | NA | NA |
| Skin-Melanoma   | 58d3e932-b4a3-4cac-a6ac-73160e354a15 | 11 | 73142908  | 73144426  | 8  | 1518  | NA | 4  | 3  | 1  | NA | NA |
| Skin-Melanoma   | 58d3e932-b4a3-4cac-a6ac-73160e354a15 | 11 | 75097916  | 75098266  | 7  | 350   | NA | 6  | 1  | NA | NA | NA |
| Skin-Melanoma   | 58d3e932-b4a3-4cac-a6ac-73160e354a15 | 11 | 75722851  | 75727546  | 15 | 4695  | 6  | 2  | 6  | NA | 1  | NA |
| Skin-Melanoma   | 58d3e932-b4a3-4cac-a6ac-73160e354a15 | 11 | 76814200  | 76818860  | 7  | 4660  | NA | 2  | 5  | NA | NA | NA |
| Skin-Melanoma   | 58d3e932-b4a3-4cac-a6ac-73160e354a15 | 11 | 78459403  | 78460242  | 9  | 839   | 1  | NA | 8  | NA | NA | NA |
| Skin-Melanoma   | 58d3e932-b4a3-4cac-a6ac-73160e354a15 | 11 | 81275618  | 81281191  | 8  | 5573  | NA | 2  | 5  | NA | NA | 1  |

|                  |                                      |    |           |           |    |       |    |    |    |    |    |    |
|------------------|--------------------------------------|----|-----------|-----------|----|-------|----|----|----|----|----|----|
| Skin-Melanoma    | 58d3e932-b4a3-4cac-a6ac-73160e354a15 | 11 | 84848995  | 84849665  | 7  | 670   | 1  | 3  | 3  | NA | NA | NA |
| Skin-Melanoma    | 58d3e932-b4a3-4cac-a6ac-73160e354a15 | 11 | 86204384  | 86204939  | 8  | 555   | 1  | 4  | 3  | NA | NA | NA |
| Skin-Melanoma    | 58d3e932-b4a3-4cac-a6ac-73160e354a15 | 11 | 87771588  | 87776491  | 10 | 4903  | 3  | 1  | 6  | NA | NA | NA |
| Skin-Melanoma    | 58d3e932-b4a3-4cac-a6ac-73160e354a15 | 11 | 88667435  | 88671400  | 16 | 3965  | 1  | 1  | 14 | NA | NA | NA |
| Skin-Melanoma    | 58d3e932-b4a3-4cac-a6ac-73160e354a15 | 11 | 93645589  | 93646222  | 8  | 633   | 2  | NA | 6  | NA | NA | NA |
| Skin-Melanoma    | 58d3e932-b4a3-4cac-a6ac-73160e354a15 | 11 | 93735359  | 93741925  | 18 | 6566  | 1  | 13 | 3  | 1  | NA | NA |
| Skin-Melanoma    | 58d3e932-b4a3-4cac-a6ac-73160e354a15 | 11 | 97421231  | 97421415  | 8  | 184   | NA | NA | 8  | NA | NA | NA |
| Liver-HCC        | 59632e7e-c622-11e3-bf01-24c6515278c0 | 4  | 97191537  | 97195384  | 6  | 3847  | NA | 2  | 4  | NA | NA | NA |
| Biliary-AdenoCA  | 5975deb5-00d2-4d18-b5c0-34ac9947fe11 | 17 | 27095079  | 27095764  | 6  | 685   | NA | 2  | 4  | NA | NA | NA |
| Biliary-AdenoCA  | 5a51a6fc-c623-11e3-bf01-24c6515278c0 | 7  | 41110155  | 41116007  | 11 | 5852  | NA | NA | NA | 8  | 1  | 2  |
| ColoRect-AdenoCA | 5b180356-cf58-4fad-a3d4-00fc12b43fcc | 17 | 28134258  | 28134678  | 9  | 420   | 1  | 4  | 4  | NA | NA | NA |
| ColoRect-AdenoCA | 5b180356-cf58-4fad-a3d4-00fc12b43fcc | 17 | 61330503  | 61331059  | 7  | 556   | NA | 3  | 4  | NA | NA | NA |
| ColoRect-AdenoCA | 5b180356-cf58-4fad-a3d4-00fc12b43fcc | 17 | 65211878  | 65212088  | 9  | 210   | 3  | 2  | 3  | NA | NA | 1  |
| ColoRect-AdenoCA | 5b180356-cf58-4fad-a3d4-00fc12b43fcc | X  | 53716263  | 53749478  | 40 | 33215 | 8  | 21 | 9  | 1  | 1  | NA |
| Panc-AdenoCA     | 5b41e033-6df8-411e-a13b-59eeb8afb9b  | 3  | 82780348  | 82782891  | 10 | 2543  | 3  | 4  | 3  | NA | NA | NA |
| Panc-AdenoCA     | 5b41e033-6df8-411e-a13b-59eeb8afb9b  | 4  | 89018269  | 89021588  | 11 | 3319  | 1  | 7  | 3  | NA | NA | NA |
| Lymph-CLL        | 5b4b2312-acb5-4329-8d46-7f93213e3daf | 2  | 89159647  | 89185612  | 68 | 25965 | 5  | 8  | 7  | 24 | 14 | 10 |
| Lymph-CLL        | 5b4b2312-acb5-4329-8d46-7f93213e3daf | 14 | 106323947 | 106375251 | 79 | 51304 | 2  | 16 | 12 | 29 | 11 | 9  |
| Lymph-CLL        | 5b4b2312-acb5-4329-8d46-7f93213e3daf | 14 | 106725264 | 106733429 | 24 | 8165  | 1  | 9  | 3  | 8  | NA | 3  |
| Lymph-CLL        | 5b4b2312-acb5-4329-8d46-7f93213e3daf | 22 | 23134868  | 23135439  | 12 | 571   | 1  | 4  | 2  | 4  | 1  | NA |
| Breast-AdenoCa   | 5b7d5767-2037-4175-aec9-886776343181 | 4  | 61166004  | 61166603  | 30 | 599   | NA | NA | 30 | NA | NA | NA |
| Breast-AdenoCa   | 5b7d5767-2037-4175-aec9-886776343181 | 4  | 63270587  | 63277325  | 24 | 6738  | NA | 2  | 22 | NA | NA | NA |
| Breast-AdenoCa   | 5b7d5767-2037-4175-aec9-886776343181 | 6  | 104702005 | 104730314 | 32 | 28309 | NA | 13 | 19 | NA | NA | NA |
| Breast-AdenoCa   | 5b7d5767-2037-4175-aec9-886776343181 | 8  | 51592776  | 51594392  | 6  | 1616  | 1  | 5  | NA | NA | NA | NA |
| Breast-AdenoCa   | 5b7d5767-2037-4175-aec9-886776343181 | 10 | 11556790  | 11558789  | 14 | 1999  | 2  | 5  | 7  | NA | NA | NA |
| Breast-AdenoCa   | 5b7d5767-2037-4175-aec9-886776343181 | 10 | 22012362  | 22013603  | 11 | 1241  | 3  | 4  | 4  | NA | NA | NA |
| Breast-AdenoCa   | 5b7d5767-2037-4175-aec9-886776343181 | 11 | 66175383  | 66180331  | 7  | 4948  | 2  | 4  | 1  | NA | NA | NA |
| Breast-AdenoCa   | 5b7d5767-2037-4175-aec9-886776343181 | 17 | 25412016  | 25412370  | 6  | 354   | NA | NA | 6  | NA | NA | NA |
| Breast-AdenoCa   | 5b7d5767-2037-4175-aec9-886776343181 | 17 | 38230260  | 38231427  | 8  | 1167  | NA | 5  | 3  | NA | NA | NA |
| Breast-AdenoCa   | 5b7d5767-2037-4175-aec9-886776343181 | 17 | 38588818  | 38603781  | 25 | 14963 | 1  | 9  | 15 | NA | NA | NA |
| Breast-AdenoCa   | 5b7d5767-2037-4175-aec9-886776343181 | 17 | 47988170  | 47994069  | 19 | 5899  | 1  | 14 | 4  | NA | NA | NA |
| Breast-AdenoCa   | 5b7d5767-2037-4175-aec9-886776343181 | 18 | 30443991  | 30444098  | 6  | 107   | NA | 2  | 4  | NA | NA | NA |
| Breast-AdenoCa   | 5b7d5767-2037-4175-aec9-886776343181 | 20 | 30819700  | 30821297  | 7  | 1597  | 1  | 1  | 5  | NA | NA | NA |
| Breast-AdenoCa   | 5b7d5767-2037-4175-aec9-886776343181 | 20 | 30862683  | 30865396  | 34 | 2713  | NA | 1  | 33 | NA | NA | NA |
| Breast-AdenoCa   | 5b7d5767-2037-4175-aec9-886776343181 | 20 | 32073006  | 32073932  | 13 | 926   | NA | NA | 13 | NA | NA | NA |
| Breast-AdenoCa   | 5b7d5767-2037-4175-aec9-886776343181 | 20 | 34175831  | 34176348  | 7  | 517   | NA | NA | 7  | NA | NA | NA |
| Breast-AdenoCa   | 5b7d5767-2037-4175-aec9-886776343181 | 22 | 24423873  | 24424354  | 6  | 481   | 1  | 3  | 2  | NA | NA | NA |
| Breast-AdenoCa   | 5b7d5767-2037-4175-aec9-886776343181 | 22 | 31056538  | 31057376  | 12 | 838   | NA | 1  | 9  | 1  | NA | 1  |
| Breast-AdenoCa   | 5b7d5767-2037-4175-aec9-886776343181 | 22 | 43260279  | 43260986  | 12 | 707   | NA | 2  | 9  | 1  | NA | NA |
| Breast-AdenoCa   | 5b7d5767-2037-4175-aec9-886776343181 | 22 | 46647876  | 46648453  | 7  | 577   | 1  | 4  | 1  | NA | NA | 1  |
| Lymph-BNHL       | 5bcf473f-417d-47a5-9745-ac7faf830b1f | 2  | 89159466  | 89181663  | 66 | 22197 | 8  | 11 | 11 | 14 | 12 | 10 |
| Lymph-BNHL       | 5bcf473f-417d-47a5-9745-ac7faf830b1f | 14 | 106112481 | 106114297 | 14 | 1816  | 3  | 2  | 9  | NA | NA | NA |
| Lymph-BNHL       | 5bcf473f-417d-47a5-9745-ac7faf830b1f | 14 | 106326074 | 106330160 | 60 | 4086  | 4  | 9  | 18 | 6  | 11 | 12 |
| Lymph-BNHL       | 5bcf473f-417d-47a5-9745-ac7faf830b1f | 16 | 46821863  | 46821984  | 6  | 121   | NA | NA | NA | NA | 3  | 3  |
| Lymph-BNHL       | 5bcf473f-417d-47a5-9745-ac7faf830b1f | 18 | 60985096  | 60988230  | 31 | 3134  | 3  | 9  | 8  | 5  | 3  | 3  |
| Lymph-BNHL       | 5bcf473f-417d-47a5-9745-ac7faf830b1f | 22 | 23223343  | 23232008  | 14 | 8665  | NA | 3  | 7  | NA | 3  | 1  |
| Kidney-RCC       | 5c156f63-6537-4d93-a6c2-4155618cf638 | 18 | 4652607   | 4653250   | 8  | 643   | 1  | 4  | 3  | NA | NA | NA |
| Prost-AdenoCA    | 5c8da06c-7964-4ad1-ac9e-d1b5507105d2 | 5  | 136644608 | 136649064 | 10 | 4456  | 1  | 5  | 4  | NA | NA | NA |
| Biliary-AdenoCA  | 5c9b8a2c-c623-11e3-bf01-24c6515278c0 | 11 | 75644634  | 75645455  | 8  | 821   | 2  | 3  | 2  | 1  | NA | NA |
| Biliary-AdenoCA  | 5c9b8a2c-c623-11e3-bf01-24c6515278c0 | 11 | 77172085  | 77180866  | 25 | 8781  | NA | 2  | 23 | NA | NA | NA |
| Ovary-AdenoCA    | 5cc7c966-499e-49e3-b509-4eeb00ee03d4 | 10 | 70308504  | 70309770  | 17 | 1266  | 2  | 6  | 9  | NA | NA | NA |
| Ovary-AdenoCA    | 5cc7c966-499e-49e3-b509-4eeb00ee03d4 | 12 | 41355996  | 41358061  | 10 | 2065  | 1  | 9  | NA | NA | NA | NA |
| Liver-HCC        | 5cf21488-c622-11e3-bf01-24c6515278c0 | 4  | 31817011  | 31819820  | 8  | 2809  | NA | NA | NA | 6  | NA | 2  |
| Panc-AdenoCA     | 5d9ff58c-5702-48fc-a66a-d1276327fd49 | 10 | 9257957   | 9258302   | 7  | 345   | 1  | 2  | 4  | NA | NA | NA |
| Panc-AdenoCA     | 5d9ff58c-5702-48fc-a66a-d1276327fd49 | 10 | 20244115  | 20244976  | 15 | 861   | 3  | 4  | 8  | NA | NA | NA |
| Panc-AdenoCA     | 5d9ff58c-5702-48fc-a66a-d1276327fd49 | 12 | 100439977 | 100441866 | 6  | 1889  | 2  | 3  | 1  | NA | NA | NA |
| Panc-AdenoCA     | 5d9ff58c-5702-48fc-a66a-d1276327fd49 | 15 | 100637253 | 100638065 | 10 | 812   | 2  | 5  | 3  | NA | NA | NA |
| Breast-AdenoCa   | 5dbf3203-ce73-41e4-bf9a-32fc856f73f5 | 17 | 32346291  | 32347110  | 6  | 819   | NA | 3  | 3  | NA | NA | NA |
| Breast-AdenoCa   | 5dbf3203-ce73-41e4-bf9a-32fc856f73f5 | 20 | 3495168   | 3496890   | 6  | 1722  | NA | 4  | 2  | NA | NA | NA |
| Breast-AdenoCa   | 5dbf3203-ce73-41e4-bf9a-32fc856f73f5 | 21 | 15831010  | 15832370  | 6  | 1360  | NA | 5  | 1  | NA | NA | NA |

|              |                                      |    |           |           |    |       |    |    |    |    |    |    |
|--------------|--------------------------------------|----|-----------|-----------|----|-------|----|----|----|----|----|----|
| Liver-HCC    | 5dce221a-c623-11e3-bf01-24c6515278c0 | 12 | 99850693  | 99853226  | 8  | 2533  | NA | 2  | 6  | NA | NA | NA |
| Liver-HCC    | 5dce221a-c623-11e3-bf01-24c6515278c0 | 12 | 117579537 | 117581616 | 11 | 2079  | 1  | 5  | 5  | NA | NA | NA |
| Liver-HCC    | 5dce221a-c623-11e3-bf01-24c6515278c0 | 15 | 38855709  | 38862093  | 13 | 6384  | 2  | 7  | 4  | NA | NA | NA |
| Liver-HCC    | 5df489bc-6178-49e4-8a42-506f70300dff | 2  | 160212494 | 160215815 | 9  | 3321  | NA | NA | NA | 4  | 5  | NA |
| Liver-HCC    | 5df489bc-6178-49e4-8a42-506f70300dff | 8  | 43498391  | 43499116  | 12 | 725   | NA | NA | NA | 4  | 5  | 3  |
| Liver-HCC    | 5df489bc-6178-49e4-8a42-506f70300dff | 9  | 92328350  | 92328688  | 6  | 338   | NA | NA | NA | 3  | 2  | 1  |
| Liver-HCC    | 5df489bc-6178-49e4-8a42-506f70300dff | 9  | 104936894 | 104937415 | 11 | 521   | NA | NA | NA | 4  | 5  | 2  |
| Liver-HCC    | 5ead73fe-1c34-48ed-b20d-89fc3c82dbd6 | 6  | 65122963  | 65123394  | 11 | 431   | NA | NA | 11 | NA | NA | NA |
| Kidney-RCC   | 5ecc88f7-8391-4168-af11-07a6bf9b3652 | 2  | 130069176 | 130070973 | 8  | 1797  | 2  | NA | 2  | 2  | NA | 2  |
| Lymph-BNHL   | 5f18b334-6616-406f-8f33-0592b56c14e6 | 2  | 89159929  | 89187465  | 45 | 27536 | 1  | 8  | 14 | 13 | 3  | 6  |
| Lymph-BNHL   | 5f18b334-6616-406f-8f33-0592b56c14e6 | 13 | 59212502  | 59213649  | 6  | 1147  | NA | NA | 2  | 2  | 2  | NA |
| Lymph-BNHL   | 5f18b334-6616-406f-8f33-0592b56c14e6 | 14 | 106325362 | 106330061 | 30 | 4699  | 1  | 9  | 8  | 5  | 3  | 4  |
| Lymph-BNHL   | 5f18b334-6616-406f-8f33-0592b56c14e6 | 18 | 60984294  | 60988189  | 14 | 3895  | NA | NA | 6  | 7  | NA | 1  |
| Lymph-BNHL   | 5f18b334-6616-406f-8f33-0592b56c14e6 | 22 | 23227689  | 23231899  | 16 | 4210  | NA | 2  | 9  | 4  | NA | 1  |
| Lymph-BNHL   | 5f18b334-6616-406f-8f33-0592b56c14e6 | X  | 9018631   | 9022553   | 6  | 3922  | 1  | NA | NA | 1  | NA | 4  |
| Lymph-CLL    | 5f53bcd4-2fd3-4574-9cc2-5efe353372b2 | 14 | 106323957 | 106326713 | 12 | 2756  | NA | 5  | 7  | NA | NA | NA |
| Eso-AdenoCa  | 5fd632ea-085e-4e9b-8dcc-ec94e492d3bf | 6  | 7606136   | 7611563   | 18 | 5427  | 3  | 1  | 14 | NA | NA | NA |
| CNS-GBM      | 5fd77ba9-5015-4d8b-86a0-582e5c76bdd6 | 9  | 30495163  | 30497436  | 7  | 2273  | 1  | 1  | 1  | 3  | NA | 1  |
| CNS-GBM      | 5fd77ba9-5015-4d8b-86a0-582e5c76bdd6 | 12 | 57971922  | 57977675  | 7  | 5753  | 1  | 1  | 4  | NA | NA | 1  |
| CNS-GBM      | 5fd77ba9-5015-4d8b-86a0-582e5c76bdd6 | 12 | 58769344  | 58773864  | 8  | 4520  | NA | 1  | 7  | NA | NA | NA |
| CNS-GBM      | 5fd77ba9-5015-4d8b-86a0-582e5c76bdd6 | 12 | 58812133  | 58821294  | 11 | 9161  | 2  | 1  | 7  | 1  | NA | NA |
| CNS-GBM      | 5fd77ba9-5015-4d8b-86a0-582e5c76bdd6 | 12 | 59023707  | 59036477  | 14 | 12770 | NA | 1  | 12 | 1  | NA | NA |
| CNS-GBM      | 5fd77ba9-5015-4d8b-86a0-582e5c76bdd6 | 12 | 59087658  | 59093152  | 7  | 5494  | 1  | NA | 4  | 1  | NA | 1  |
| CNS-GBM      | 5fd77ba9-5015-4d8b-86a0-582e5c76bdd6 | 12 | 59133161  | 59145595  | 14 | 12434 | 3  | 2  | 6  | 1  | NA | 2  |
| CNS-GBM      | 5fd77ba9-5015-4d8b-86a0-582e5c76bdd6 | 12 | 59373127  | 59382415  | 14 | 9288  | 1  | 3  | 5  | 2  | 3  | NA |
| CNS-GBM      | 5fd77ba9-5015-4d8b-86a0-582e5c76bdd6 | 12 | 59961779  | 59967550  | 7  | 5771  | 1  | NA | 2  | 1  | 3  | NA |
| CNS-GBM      | 5fd77ba9-5015-4d8b-86a0-582e5c76bdd6 | X  | 141260317 | 141265246 | 7  | 4929  | NA | NA | NA | 6  | NA | 1  |
| Kidney-RCC   | 603594e3-e427-494c-b9ee-e872d6629563 | 2  | 144138567 | 144139578 | 6  | 1011  | 2  | 3  | 1  | NA | NA | NA |
| Panc-AdenoCA | 60aff7a0-4960-4ed1-922b-3233ccbfdba1 | 8  | 29083517  | 29084562  | 10 | 1045  | 2  | 4  | 4  | NA | NA | NA |
| Panc-AdenoCA | 60aff7a0-4960-4ed1-922b-3233ccbfdba1 | 8  | 29578910  | 29579291  | 7  | 381   | NA | 4  | 3  | NA | NA | NA |
| Panc-AdenoCA | 60aff7a0-4960-4ed1-922b-3233ccbfdba1 | 8  | 29780557  | 29781232  | 7  | 675   | 1  | 5  | 1  | NA | NA | NA |
| Panc-AdenoCA | 60aff7a0-4960-4ed1-922b-3233ccbfdba1 | 9  | 37377766  | 37379642  | 11 | 1876  | 1  | 4  | 6  | NA | NA | NA |
| Panc-AdenoCA | 60aff7a0-4960-4ed1-922b-3233ccbfdba1 | 18 | 23238486  | 23238657  | 7  | 171   | 3  | 3  | 1  | NA | NA | NA |
| Panc-AdenoCA | 60aff7a0-4960-4ed1-922b-3233ccbfdba1 | 19 | 39934052  | 39937395  | 13 | 3343  | 2  | 4  | 7  | NA | NA | NA |
| Panc-AdenoCA | 60aff7a0-4960-4ed1-922b-3233ccbfdba1 | 21 | 18026828  | 18035592  | 27 | 8764  | 1  | 8  | 18 | NA | NA | NA |
| Panc-AdenoCA | 60aff7a0-4960-4ed1-922b-3233ccbfdba1 | 21 | 18171647  | 18181167  | 31 | 9520  | 4  | 10 | 17 | NA | NA | NA |
| Panc-AdenoCA | 60aff7a0-4960-4ed1-922b-3233ccbfdba1 | 21 | 39636713  | 39638344  | 7  | 1631  | NA | NA | 4  | 1  | 1  | 1  |
| Panc-AdenoCA | 60aff7a0-4960-4ed1-922b-3233ccbfdba1 | 22 | 21026974  | 21027161  | 6  | 187   | 1  | 2  | 3  | NA | NA | NA |
| Panc-AdenoCA | 60aff7a0-4960-4ed1-922b-3233ccbfdba1 | 22 | 21797074  | 21800472  | 17 | 3398  | 3  | 6  | 8  | NA | NA | NA |
| Panc-AdenoCA | 60aff7a0-4960-4ed1-922b-3233ccbfdba1 | 22 | 45637689  | 45639213  | 9  | 1524  | 1  | 5  | 3  | NA | NA | NA |
| Panc-AdenoCA | 60c33e32-7e19-4e71-b075-a63fcf27e660 | 1  | 2353486   | 2354982   | 6  | 1496  | NA | 3  | 3  | NA | NA | NA |
| Panc-AdenoCA | 60c33e32-7e19-4e71-b075-a63fcf27e660 | 3  | 87570029  | 87572868  | 8  | 2839  | 1  | 4  | 3  | NA | NA | NA |
| Panc-AdenoCA | 60c33e32-7e19-4e71-b075-a63fcf27e660 | 12 | 4538276   | 4541851   | 6  | 3575  | NA | 2  | 4  | NA | NA | NA |
| Panc-AdenoCA | 60c33e32-7e19-4e71-b075-a63fcf27e660 | 20 | 2911859   | 2913206   | 7  | 1347  | 2  | 2  | 3  | NA | NA | NA |
| Panc-AdenoCA | 60c33e32-7e19-4e71-b075-a63fcf27e660 | 21 | 20137823  | 20139824  | 10 | 2001  | NA | 3  | 7  | NA | NA | NA |
| Panc-AdenoCA | 60c33e32-7e19-4e71-b075-a63fcf27e660 | 21 | 31480476  | 31481508  | 12 | 1032  | 2  | 4  | 6  | NA | NA | NA |
| Panc-AdenoCA | 60c33e32-7e19-4e71-b075-a63fcf27e660 | X  | 49543570  | 49544826  | 11 | 1256  | 1  | 5  | 5  | NA | NA | NA |
| Panc-AdenoCA | 60e78c80-41a5-456a-9a81-9007d18fd72c | 1  | 181521339 | 181524196 | 10 | 2857  | NA | 4  | 6  | NA | NA | NA |
| Panc-AdenoCA | 60e78c80-41a5-456a-9a81-9007d18fd72c | 1  | 247457508 | 247457856 | 19 | 348   | NA | 3  | 16 | NA | NA | NA |
| Panc-AdenoCA | 60e78c80-41a5-456a-9a81-9007d18fd72c | 3  | 20022247  | 20024629  | 18 | 2382  | 1  | 7  | 10 | NA | NA | NA |
| Panc-AdenoCA | 60e78c80-41a5-456a-9a81-9007d18fd72c | 3  | 22084108  | 22085782  | 14 | 1674  | NA | 5  | 8  | NA | 1  | NA |
| Panc-AdenoCA | 60e78c80-41a5-456a-9a81-9007d18fd72c | 7  | 25731005  | 25734787  | 11 | 3782  | NA | 5  | 6  | NA | NA | NA |
| Panc-AdenoCA | 60e78c80-41a5-456a-9a81-9007d18fd72c | 9  | 10378225  | 10378750  | 8  | 525   | NA | 3  | 5  | NA | NA | NA |
| Panc-AdenoCA | 60e78c80-41a5-456a-9a81-9007d18fd72c | 11 | 111742226 | 111742366 | 6  | 140   | NA | 2  | 4  | NA | NA | NA |
| Panc-AdenoCA | 60e78c80-41a5-456a-9a81-9007d18fd72c | 18 | 33497695  | 33498679  | 9  | 984   | 2  | 4  | 3  | NA | NA | NA |
| Panc-AdenoCA | 60e78c80-41a5-456a-9a81-9007d18fd72c | 19 | 12512167  | 12513503  | 7  | 1336  | NA | 4  | 3  | NA | NA | NA |
| Panc-AdenoCA | 60e78c80-41a5-456a-9a81-9007d18fd72c | 19 | 13261191  | 13262758  | 12 | 1567  | 3  | 6  | 3  | NA | NA | NA |
| Panc-AdenoCA | 60e78c80-41a5-456a-9a81-9007d18fd72c | 21 | 18733777  | 18742346  | 19 | 8569  | 3  | 4  | 12 | NA | NA | NA |
| Panc-AdenoCA | 60e78c80-41a5-456a-9a81-9007d18fd72c | 21 | 29639348  | 29647580  | 11 | 8232  | 2  | 2  | 7  | NA | NA | NA |
| Panc-AdenoCA | 60e78c80-41a5-456a-9a81-9007d18fd72c | 21 | 29654882  | 29657240  | 9  | 2358  | 3  | 2  | 4  | NA | NA | NA |

|                 |                                      |    |           |           |     |       |    |    |    |    |    |    |
|-----------------|--------------------------------------|----|-----------|-----------|-----|-------|----|----|----|----|----|----|
| Panc-AdenoCA    | 60e78c80-41a5-456a-9a81-9007d18fd72c | 21 | 30938599  | 30942977  | 12  | 4378  | 3  | 5  | 4  | NA | NA | NA |
| Panc-AdenoCA    | 60e78c80-41a5-456a-9a81-9007d18fd72c | 21 | 34465571  | 34475834  | 31  | 10263 | 6  | 6  | 19 | NA | NA | NA |
| Panc-AdenoCA    | 60e78c80-41a5-456a-9a81-9007d18fd72c | 21 | 40217157  | 40218172  | 10  | 1015  | 3  | 2  | 5  | NA | NA | NA |
| Panc-AdenoCA    | 60e78c80-41a5-456a-9a81-9007d18fd72c | 21 | 42608632  | 42616287  | 16  | 7655  | 3  | 4  | 9  | NA | NA | NA |
| Panc-AdenoCA    | 60e78c80-41a5-456a-9a81-9007d18fd72c | 21 | 43346020  | 43348952  | 7   | 2932  | 3  | 1  | 3  | NA | NA | NA |
| Biliary-AdenoCA | 60f81dba-c623-11e3-bf01-24c6515278c0 | 1  | 31085094  | 31085852  | 7   | 758   | NA | 1  | 6  | NA | NA | NA |
| Biliary-AdenoCA | 60f81dba-c623-11e3-bf01-24c6515278c0 | 1  | 31253314  | 31254464  | 10  | 1150  | 2  | 7  | 1  | NA | NA | NA |
| Biliary-AdenoCA | 60f81dba-c623-11e3-bf01-24c6515278c0 | 1  | 51975350  | 51978957  | 13  | 3607  | NA | NA | 12 | NA | 1  | NA |
| Biliary-AdenoCA | 60f81dba-c623-11e3-bf01-24c6515278c0 | 1  | 117541303 | 117544142 | 7   | 2839  | NA | NA | 4  | NA | 2  | 1  |
| Biliary-AdenoCA | 60f81dba-c623-11e3-bf01-24c6515278c0 | 1  | 216308265 | 216313038 | 18  | 4773  | NA | 1  | 17 | NA | NA | NA |
| Biliary-AdenoCA | 60f81dba-c623-11e3-bf01-24c6515278c0 | 4  | 68781146  | 68784477  | 8   | 3331  | NA | 1  | 7  | NA | NA | NA |
| Biliary-AdenoCA | 60f81dba-c623-11e3-bf01-24c6515278c0 | 6  | 65300337  | 65305475  | 18  | 5138  | NA | NA | 18 | NA | NA | NA |
| Biliary-AdenoCA | 60f81dba-c623-11e3-bf01-24c6515278c0 | 6  | 65328685  | 65337996  | 29  | 9311  | 2  | 7  | 19 | 1  | NA | NA |
| Biliary-AdenoCA | 60f81dba-c623-11e3-bf01-24c6515278c0 | 6  | 65383062  | 65385787  | 7   | 2725  | NA | NA | 7  | NA | NA | NA |
| Biliary-AdenoCA | 60f81dba-c623-11e3-bf01-24c6515278c0 | 13 | 19616912  | 19618504  | 6   | 1592  | NA | 2  | 4  | NA | NA | NA |
| Stomach-AdenoCA | 61cad26a-cbc6-4977-83b9-dc61e49f2861 | 17 | 61178270  | 61188571  | 27  | 10301 | 3  | 2  | 21 | NA | NA | 1  |
| Prost-AdenoCA   | 61d941f1-87df-43af-8a29-b6809c809275 | 12 | 28704693  | 28713750  | 30  | 9057  | 1  | 13 | 16 | NA | NA | NA |
| Prost-AdenoCA   | 61d941f1-87df-43af-8a29-b6809c809275 | 20 | 30387479  | 30389681  | 7   | 2202  | NA | 1  | 6  | NA | NA | NA |
| Prost-AdenoCA   | 61d941f1-87df-43af-8a29-b6809c809275 | 20 | 34970428  | 34977909  | 10  | 7481  | 1  | 5  | 4  | NA | NA | NA |
| Prost-AdenoCA   | 6218f366-d5d2-4289-a95e-eeedfae7523a | 8  | 42499928  | 42502880  | 6   | 2952  | NA | 3  | 3  | NA | NA | NA |
| Prost-AdenoCA   | 6218f366-d5d2-4289-a95e-eeedfae7523a | 8  | 42527545  | 42532781  | 9   | 5236  | 1  | 5  | 3  | NA | NA | NA |
| Stomach-AdenoCA | 622eaa04-b8f9-471b-98b0-7befd119f14c | 18 | 4467182   | 4467644   | 14  | 462   | 1  | 6  | 7  | NA | NA | NA |
| Stomach-AdenoCA | 622eaa04-b8f9-471b-98b0-7befd119f14c | 18 | 19733933  | 19734631  | 8   | 698   | 2  | 1  | 4  | 1  | NA | NA |
| Lymph-BNHL      | 626c9788-d70c-449b-b9dc-5e3f6fc00991 | 2  | 89127489  | 89129067  | 7   | 1578  | NA | 4  | 1  | 1  | 1  | NA |
| Lymph-BNHL      | 626c9788-d70c-449b-b9dc-5e3f6fc00991 | 2  | 89155981  | 89197123  | 149 | 41142 | 7  | 21 | 26 | 49 | 16 | 30 |
| Lymph-BNHL      | 626c9788-d70c-449b-b9dc-5e3f6fc00991 | 2  | 89442289  | 89442651  | 13  | 362   | NA | 2  | 4  | 6  | 1  | NA |
| Lymph-BNHL      | 626c9788-d70c-449b-b9dc-5e3f6fc00991 | 4  | 97640613  | 97642151  | 9   | 1538  | NA | NA | NA | 2  | NA | 7  |
| Lymph-BNHL      | 626c9788-d70c-449b-b9dc-5e3f6fc00991 | 4  | 160952648 | 160956976 | 8   | 4328  | NA | NA | 1  | 4  | 1  | 2  |
| Lymph-BNHL      | 626c9788-d70c-449b-b9dc-5e3f6fc00991 | 6  | 31549062  | 31549877  | 6   | 815   | 1  | 3  | 2  | NA | NA | NA |
| Lymph-BNHL      | 626c9788-d70c-449b-b9dc-5e3f6fc00991 | 6  | 134495396 | 134496694 | 10  | 1298  | NA | 2  | 2  | 1  | 1  | 4  |
| Lymph-BNHL      | 626c9788-d70c-449b-b9dc-5e3f6fc00991 | 8  | 59973234  | 59973526  | 6   | 292   | NA | NA | NA | 3  | 1  | 2  |
| Lymph-BNHL      | 626c9788-d70c-449b-b9dc-5e3f6fc00991 | 12 | 113494076 | 113497946 | 6   | 3870  | NA | NA | 4  | NA | 1  | 1  |
| Lymph-BNHL      | 626c9788-d70c-449b-b9dc-5e3f6fc00991 | 14 | 102285457 | 102287310 | 6   | 1853  | NA | NA | 1  | 4  | NA | 1  |
| Lymph-BNHL      | 626c9788-d70c-449b-b9dc-5e3f6fc00991 | 14 | 106055516 | 106056305 | 9   | 789   | NA | 3  | 6  | NA | NA | NA |
| Lymph-BNHL      | 626c9788-d70c-449b-b9dc-5e3f6fc00991 | 14 | 106068330 | 106071318 | 10  | 2988  | NA | 5  | 4  | 1  | NA | NA |
| Lymph-BNHL      | 626c9788-d70c-449b-b9dc-5e3f6fc00991 | 14 | 106110995 | 106114630 | 28  | 3635  | 2  | 6  | 19 | NA | NA | 1  |
| Lymph-BNHL      | 626c9788-d70c-449b-b9dc-5e3f6fc00991 | 14 | 106209666 | 106214932 | 21  | 5266  | 4  | 3  | 10 | 1  | 3  | NA |
| Lymph-BNHL      | 626c9788-d70c-449b-b9dc-5e3f6fc00991 | 14 | 106238814 | 106240670 | 30  | 1856  | 3  | 7  | 18 | 1  | NA | 1  |
| Lymph-BNHL      | 626c9788-d70c-449b-b9dc-5e3f6fc00991 | 14 | 106324374 | 106330559 | 100 | 6185  | 8  | 21 | 41 | 13 | 4  | 13 |
| Lymph-BNHL      | 626c9788-d70c-449b-b9dc-5e3f6fc00991 | 14 | 106692274 | 106692552 | 7   | 278   | NA | 1  | 1  | 4  | NA | 1  |
| Lymph-BNHL      | 626c9788-d70c-449b-b9dc-5e3f6fc00991 | 16 | 11462434  | 11462539  | 7   | 105   | 1  | NA | NA | 3  | 1  | 2  |
| Lymph-BNHL      | 626c9788-d70c-449b-b9dc-5e3f6fc00991 | 16 | 78739234  | 78745215  | 7   | 5981  | 1  | NA | NA | 2  | 3  | 1  |
| Lymph-BNHL      | 626c9788-d70c-449b-b9dc-5e3f6fc00991 | 16 | 85931783  | 85933433  | 8   | 1650  | 2  | 2  | 1  | 2  | 1  | NA |
| Lymph-BNHL      | 626c9788-d70c-449b-b9dc-5e3f6fc00991 | 18 | 60984851  | 60988523  | 58  | 3672  | 4  | 6  | 17 | 16 | 6  | 9  |
| Lymph-BNHL      | 626c9788-d70c-449b-b9dc-5e3f6fc00991 | 22 | 23223125  | 23300877  | 137 | 77752 | 9  | 23 | 35 | 43 | 11 | 16 |
| Panc-AdenoCA    | 6297aa77-37a0-4f46-987b-32bd8653c0c2 | 7  | 23918053  | 23918220  | 9   | 167   | 3  | 2  | 4  | NA | NA | NA |
| Panc-AdenoCA    | 6297aa77-37a0-4f46-987b-32bd8653c0c2 | 12 | 54944214  | 54945704  | 9   | 1490  | NA | 2  | 7  | NA | NA | NA |
| Panc-AdenoCA    | 6297aa77-37a0-4f46-987b-32bd8653c0c2 | 14 | 97600219  | 97601704  | 12  | 1485  | 3  | 3  | 6  | NA | NA | NA |
| Panc-AdenoCA    | 631ab9d0-5400-400c-b0bc-c3e576bcfe06 | 1  | 59495407  | 59498867  | 11  | 3460  | 2  | 4  | 4  | NA | 1  | NA |
| Panc-AdenoCA    | 631ab9d0-5400-400c-b0bc-c3e576bcfe06 | 6  | 49638173  | 49638584  | 8   | 411   | NA | 3  | 5  | NA | NA | NA |
| Panc-AdenoCA    | 631ab9d0-5400-400c-b0bc-c3e576bcfe06 | 10 | 37131143  | 37133497  | 6   | 2354  | 2  | 2  | 2  | NA | NA | NA |
| Liver-HCC       | 632f3eb0-c623-11e3-bf01-24c6515278c0 | 11 | 60696356  | 60697506  | 9   | 1150  | NA | 4  | 5  | NA | NA | NA |
| Bone-Leiomyo    | 63db50d6-5ef2-44d0-9906-26eae74ecf44 | 2  | 15293960  | 15295331  | 7   | 1371  | NA | NA | 7  | NA | NA | NA |
| Bone-Leiomyo    | 63db50d6-5ef2-44d0-9906-26eae74ecf44 | 2  | 232280845 | 232285724 | 31  | 4879  | NA | NA | 31 | NA | NA | NA |
| Bone-Leiomyo    | 63db50d6-5ef2-44d0-9906-26eae74ecf44 | 4  | 1976385   | 1982551   | 12  | 6166  | NA | NA | 12 | NA | NA | NA |
| Bone-Leiomyo    | 63db50d6-5ef2-44d0-9906-26eae74ecf44 | 5  | 27392618  | 27392882  | 9   | 264   | NA | NA | 9  | NA | NA | NA |
| Bone-Leiomyo    | 63db50d6-5ef2-44d0-9906-26eae74ecf44 | 5  | 41058917  | 41061878  | 8   | 2961  | NA | NA | 8  | NA | NA | NA |
| Bone-Leiomyo    | 63db50d6-5ef2-44d0-9906-26eae74ecf44 | 5  | 95142794  | 95143560  | 7   | 766   | NA | NA | 7  | NA | NA | NA |
| Bone-Leiomyo    | 63db50d6-5ef2-44d0-9906-26eae74ecf44 | 5  | 110134728 | 110142203 | 28  | 7475  | 1  | 3  | 24 | NA | NA | NA |
| Bone-Leiomyo    | 63db50d6-5ef2-44d0-9906-26eae74ecf44 | 8  | 30791253  | 30796350  | 7   | 5097  | 1  | 4  | 2  | NA | NA | NA |

|                 |                                      |    |           |           |    |       |    |    |    |    |    |    |
|-----------------|--------------------------------------|----|-----------|-----------|----|-------|----|----|----|----|----|----|
| Bone-Leiomyo    | 63db50d6-5ef2-44d0-9906-26eae74ecf44 | 12 | 48787766  | 48791490  | 9  | 3724  | NA | 7  | 2  | NA | NA | NA |
| Bone-Leiomyo    | 63db50d6-5ef2-44d0-9906-26eae74ecf44 | 12 | 52957556  | 52958033  | 10 | 477   | 2  | 6  | 2  | NA | NA | NA |
| Bone-Leiomyo    | 63db50d6-5ef2-44d0-9906-26eae74ecf44 | 12 | 62543060  | 62550090  | 11 | 7030  | 1  | 5  | 5  | NA | NA | NA |
| Bone-Leiomyo    | 63db50d6-5ef2-44d0-9906-26eae74ecf44 | 12 | 66289292  | 66290720  | 23 | 1428  | NA | 6  | 17 | NA | NA | NA |
| Bone-Leiomyo    | 63db50d6-5ef2-44d0-9906-26eae74ecf44 | 12 | 69175350  | 69177906  | 9  | 2556  | NA | 5  | 4  | NA | NA | NA |
| Bone-Leiomyo    | 63db50d6-5ef2-44d0-9906-26eae74ecf44 | 12 | 73906390  | 73909071  | 14 | 2681  | 3  | 5  | 6  | NA | NA | NA |
| Bone-Leiomyo    | 63db50d6-5ef2-44d0-9906-26eae74ecf44 | 12 | 75391713  | 75395022  | 8  | 3309  | 1  | 6  | 1  | NA | NA | NA |
| Bone-Leiomyo    | 63db50d6-5ef2-44d0-9906-26eae74ecf44 | 12 | 75645966  | 75652258  | 11 | 6292  | 1  | 4  | 6  | NA | NA | NA |
| Bone-Leiomyo    | 63db50d6-5ef2-44d0-9906-26eae74ecf44 | 12 | 75699364  | 75704801  | 9  | 5437  | NA | 3  | 6  | NA | NA | NA |
| Bone-Leiomyo    | 63db50d6-5ef2-44d0-9906-26eae74ecf44 | 12 | 75747403  | 75754483  | 15 | 7080  | 2  | 3  | 9  | 1  | NA | NA |
| Bone-Leiomyo    | 63db50d6-5ef2-44d0-9906-26eae74ecf44 | 12 | 91333135  | 91336837  | 9  | 3702  | NA | 4  | 5  | NA | NA | NA |
| Bone-Leiomyo    | 63db50d6-5ef2-44d0-9906-26eae74ecf44 | 12 | 112782959 | 112790534 | 16 | 7575  | NA | 6  | 9  | NA | 1  | NA |
| Bone-Leiomyo    | 63db50d6-5ef2-44d0-9906-26eae74ecf44 | 19 | 6894868   | 6895354   | 7  | 486   | NA | NA | 6  | NA | 1  | NA |
| Bone-Leiomyo    | 63db50d6-5ef2-44d0-9906-26eae74ecf44 | Y  | 13216586  | 13221267  | 60 | 4681  | NA | NA | 60 | NA | NA | NA |
| Eso-AdenoCa     | 6495e68e-1434-45d3-a03d-f286447dda79 | 6  | 48590028  | 48601473  | 13 | 11445 | 2  | 4  | 5  | NA | NA | 2  |
| Thy-AdenoCA     | 64a17d5b-8f40-4ccf-8f2f-e68c5fe6b1ff | 1  | 109559774 | 109560393 | 6  | 619   | NA | 2  | 4  | NA | NA | NA |
| Liver-HCC       | 64b80154-c623-11e3-bf01-24c6515278c0 | 1  | 241318799 | 241322731 | 12 | 3932  | NA | 8  | 4  | NA | NA | NA |
| Liver-HCC       | 64b80154-c623-11e3-bf01-24c6515278c0 | 17 | 22043194  | 22046007  | 10 | 2813  | 2  | 4  | 4  | NA | NA | NA |
| Lymph-BNHL      | 650fe009-da01-4717-89df-9c95fafa3d7e | 1  | 188331227 | 188334133 | 6  | 2906  | NA | NA | NA | 3  | 1  | 2  |
| Lymph-BNHL      | 650fe009-da01-4717-89df-9c95fafa3d7e | 2  | 89158105  | 89159779  | 42 | 1674  | 4  | 2  | 4  | 20 | 4  | 8  |
| Lymph-BNHL      | 650fe009-da01-4717-89df-9c95fafa3d7e | 9  | 30397045  | 30400792  | 7  | 3747  | NA | NA | 1  | 3  | 2  | 1  |
| Lymph-BNHL      | 650fe009-da01-4717-89df-9c95fafa3d7e | 14 | 106326882 | 106330100 | 33 | 3218  | NA | 6  | 12 | 8  | 1  | 6  |
| Lymph-BNHL      | 650fe009-da01-4717-89df-9c95fafa3d7e | 14 | 106725595 | 106733159 | 10 | 7564  | 2  | NA | NA | 4  | 3  | 1  |
| Lymph-BNHL      | 650fe009-da01-4717-89df-9c95fafa3d7e | 18 | 60984881  | 60988278  | 8  | 3397  | NA | 3  | 3  | NA | 1  | 1  |
| Lymph-BNHL      | 650fe009-da01-4717-89df-9c95fafa3d7e | 22 | 23223200  | 23231546  | 15 | 8346  | 1  | 5  | 2  | 4  | 1  | 2  |
| Lymph-BNHL      | 650fe009-da01-4717-89df-9c95fafa3d7e | X  | 142520900 | 142525780 | 6  | 4880  | NA | NA | NA | 3  | 1  | 2  |
| Panc-AdenoCA    | 654dba9f-cfe5-4121-97c7-868613cdef53 | 8  | 77127454  | 77127800  | 6  | 346   | NA | 5  | 1  | NA | NA | NA |
| Panc-AdenoCA    | 654dba9f-cfe5-4121-97c7-868613cdef53 | 8  | 117715114 | 117718768 | 12 | 3654  | NA | 1  | NA | 1  | 8  | 2  |
| Panc-AdenoCA    | 654dba9f-cfe5-4121-97c7-868613cdef53 | 11 | 9281360   | 9282847   | 9  | 1487  | NA | 5  | 4  | NA | NA | NA |
| CNS-GBM         | 65723119-bdfe-46f0-b629-c171023abd71 | 3  | 173369004 | 173369705 | 9  | 701   | NA | 6  | 3  | NA | NA | NA |
| CNS-GBM         | 65723119-bdfe-46f0-b629-c171023abd71 | 7  | 28280658  | 28281705  | 7  | 1047  | 1  | 4  | 2  | NA | NA | NA |
| CNS-GBM         | 65723119-bdfe-46f0-b629-c171023abd71 | 7  | 28386470  | 28391920  | 9  | 5450  | NA | 4  | 4  | NA | 1  | NA |
| CNS-GBM         | 65723119-bdfe-46f0-b629-c171023abd71 | 7  | 52156698  | 52158938  | 11 | 2240  | 4  | 5  | 2  | NA | NA | NA |
| CNS-GBM         | 65723119-bdfe-46f0-b629-c171023abd71 | 7  | 53906569  | 53908260  | 7  | 1691  | 2  | 1  | 3  | NA | 1  | NA |
| CNS-GBM         | 65723119-bdfe-46f0-b629-c171023abd71 | 7  | 54650556  | 54654924  | 8  | 4368  | 5  | 3  | NA | NA | NA | NA |
| CNS-GBM         | 65723119-bdfe-46f0-b629-c171023abd71 | 7  | 55348023  | 55349530  | 7  | 1507  | 2  | 2  | 3  | NA | NA | NA |
| CNS-GBM         | 65723119-bdfe-46f0-b629-c171023abd71 | 7  | 89717194  | 89721387  | 7  | 4193  | NA | 1  | 1  | 2  | 3  | NA |
| CNS-GBM         | 65723119-bdfe-46f0-b629-c171023abd71 | X  | 81207979  | 81212588  | 7  | 4609  | 1  | 2  | 2  | 2  | NA | NA |
| Stomach-AdenoCA | 65be412d-46c3-4cbf-9b46-b35351e53065 | 5  | 137918072 | 137918729 | 6  | 657   | NA | 3  | 2  | NA | NA | 1  |
| Stomach-AdenoCA | 65be412d-46c3-4cbf-9b46-b35351e53065 | 19 | 22086843  | 22089204  | 7  | 2361  | NA | 6  | 1  | NA | NA | NA |
| Panc-AdenoCA    | 65d2dbc3-a163-4696-b246-47a430e66572 | 2  | 64610475  | 64611559  | 23 | 1084  | 2  | 8  | 12 | NA | NA | 1  |
| Panc-AdenoCA    | 65d2dbc3-a163-4696-b246-47a430e66572 | 8  | 65271031  | 65272159  | 16 | 1128  | NA | 4  | 10 | NA | NA | 2  |
| Panc-AdenoCA    | 65d2dbc3-a163-4696-b246-47a430e66572 | 8  | 65400908  | 65412365  | 40 | 11457 | 4  | 6  | 30 | NA | NA | NA |
| Panc-AdenoCA    | 65d2dbc3-a163-4696-b246-47a430e66572 | 11 | 7813379   | 7813934   | 6  | 555   | 1  | 2  | 3  | NA | NA | NA |
| Panc-AdenoCA    | 65d2dbc3-a163-4696-b246-47a430e66572 | 11 | 107556514 | 107560181 | 22 | 3667  | 2  | 6  | 14 | NA | NA | NA |
| Panc-AdenoCA    | 65d2dbc3-a163-4696-b246-47a430e66572 | 11 | 107589258 | 107590379 | 9  | 1121  | NA | 5  | 4  | NA | NA | NA |
| Panc-AdenoCA    | 65d2dbc3-a163-4696-b246-47a430e66572 | X  | 126610295 | 126612217 | 11 | 1922  | 2  | 3  | 6  | NA | NA | NA |
| Uterus-AdenoCA  | 65f9a820-f026-4a10-8bb7-1fbc3b38321e | 19 | 28029531  | 28032852  | 6  | 3321  | NA | 2  | 4  | NA | NA | NA |
| Uterus-AdenoCA  | 65f9a820-f026-4a10-8bb7-1fbc3b38321e | 19 | 28037649  | 28039313  | 22 | 1664  | 4  | 8  | 10 | NA | NA | NA |
| Panc-AdenoCA    | 66290cc6-11f1-4a0b-83d1-423952da4840 | 17 | 44171162  | 44173794  | 9  | 2632  | NA | 4  | 5  | NA | NA | NA |
| Panc-AdenoCA    | 66290cc6-11f1-4a0b-83d1-423952da4840 | 18 | 23365345  | 23366826  | 6  | 1481  | 1  | 1  | 4  | NA | NA | NA |
| Ovary-AdenoCA   | 669f0e01-28f6-4ed8-bdb5-73f84ea28f78 | 13 | 75054373  | 75058192  | 7  | 3819  | 4  | 3  | NA | NA | NA | NA |
| Ovary-AdenoCA   | 669f0e01-28f6-4ed8-bdb5-73f84ea28f78 | 13 | 78803310  | 78803700  | 9  | 390   | 1  | 2  | 6  | NA | NA | NA |
| Ovary-AdenoCA   | 669f0e01-28f6-4ed8-bdb5-73f84ea28f78 | 13 | 90735523  | 90736360  | 7  | 837   | 3  | 3  | 1  | NA | NA | NA |
| Liver-HCC       | 670f971f-a525-4ef8-91ba-610cfbaeb914 | 13 | 101725537 | 101728041 | 8  | 2504  | 1  | 7  | NA | NA | NA | NA |
| Lung-AdenoCA    | 6726c157-f688-491d-8b56-35628645df89 | 1  | 219601499 | 219603751 | 7  | 2252  | NA | 4  | 3  | NA | NA | NA |
| Liver-HCC       | 674819dc-c622-11e3-bf01-24c6515278c0 | 1  | 97637216  | 97637586  | 6  | 370   | NA | NA | 6  | NA | NA | NA |
| Liver-HCC       | 674819dc-c622-11e3-bf01-24c6515278c0 | 1  | 97656565  | 97657567  | 8  | 1002  | NA | NA | 5  | 2  | 1  | NA |
| Liver-HCC       | 674819dc-c622-11e3-bf01-24c6515278c0 | 1  | 114908649 | 114912194 | 8  | 3545  | NA | NA | 8  | NA | NA | NA |
| Liver-HCC       | 674819dc-c622-11e3-bf01-24c6515278c0 | 6  | 107981879 | 107986565 | 6  | 4686  | NA | NA | NA | 4  | 2  | NA |

|                |                                      |    |           |           |    |       |    |    |    |    |    |    |
|----------------|--------------------------------------|----|-----------|-----------|----|-------|----|----|----|----|----|----|
| Liver-HCC      | 674819dc-c622-11e3-bf01-24c6515278c0 | 6  | 108002598 | 108004980 | 15 | 2382  | 1  | 6  | 8  | NA | NA | NA |
| Breast-AdenoCa | 6764e0a2-7a78-45c1-9189-6001c6518ce4 | 1  | 1810033   | 1814673   | 20 | 4640  | 6  | 4  | 10 | NA | NA | NA |
| Breast-AdenoCa | 6764e0a2-7a78-45c1-9189-6001c6518ce4 | 1  | 1867772   | 1874061   | 16 | 6289  | 2  | 5  | 9  | NA | NA | NA |
| Breast-AdenoCa | 6764e0a2-7a78-45c1-9189-6001c6518ce4 | 3  | 89123766  | 89125390  | 9  | 1624  | 1  | 4  | 4  | NA | NA | NA |
| Breast-AdenoCa | 6764e0a2-7a78-45c1-9189-6001c6518ce4 | 5  | 760912    | 763976    | 6  | 3064  | NA | 5  | 1  | NA | NA | NA |
| Breast-AdenoCa | 6764e0a2-7a78-45c1-9189-6001c6518ce4 | 5  | 13738309  | 13745607  | 16 | 7298  | NA | 10 | 6  | NA | NA | NA |
| Breast-AdenoCa | 6764e0a2-7a78-45c1-9189-6001c6518ce4 | 5  | 15899735  | 15905933  | 9  | 6198  | 1  | 3  | 5  | NA | NA | NA |
| Breast-AdenoCa | 6764e0a2-7a78-45c1-9189-6001c6518ce4 | 5  | 21120631  | 21125300  | 22 | 4669  | 1  | 12 | 9  | NA | NA | NA |
| Breast-AdenoCa | 6764e0a2-7a78-45c1-9189-6001c6518ce4 | 5  | 21732611  | 21732636  | 7  | 25    | 1  | NA | 3  | NA | NA | 3  |
| Breast-AdenoCa | 6764e0a2-7a78-45c1-9189-6001c6518ce4 | 5  | 24770971  | 24773270  | 8  | 2299  | NA | 6  | 2  | NA | NA | NA |
| Breast-AdenoCa | 6764e0a2-7a78-45c1-9189-6001c6518ce4 | 5  | 25560905  | 25562255  | 7  | 1350  | NA | 5  | 2  | NA | NA | NA |
| Breast-AdenoCa | 6764e0a2-7a78-45c1-9189-6001c6518ce4 | 5  | 34495465  | 34497511  | 8  | 2046  | NA | 4  | 4  | NA | NA | NA |
| Breast-AdenoCa | 6764e0a2-7a78-45c1-9189-6001c6518ce4 | 5  | 36176209  | 36182622  | 8  | 6413  | NA | 4  | 4  | NA | NA | NA |
| Breast-AdenoCa | 6764e0a2-7a78-45c1-9189-6001c6518ce4 | X  | 133671495 | 133678289 | 23 | 6794  | 2  | 15 | 6  | NA | NA | NA |
| Bone-Leiomyo   | 67bb70b2-b6f8-4aa9-80ce-48829f9fec56 | 1  | 52298961  | 52301468  | 8  | 2507  | NA | 2  | 6  | NA | NA | NA |
| Bone-Leiomyo   | 67bb70b2-b6f8-4aa9-80ce-48829f9fec56 | 1  | 61915121  | 61917371  | 10 | 2250  | NA | 2  | 8  | NA | NA | NA |
| Bone-Leiomyo   | 67bb70b2-b6f8-4aa9-80ce-48829f9fec56 | 5  | 81491     | 82091     | 6  | 600   | 1  | 3  | 2  | NA | NA | NA |
| Bone-Leiomyo   | 67bb70b2-b6f8-4aa9-80ce-48829f9fec56 | 5  | 173084    | 173593    | 9  | 509   | 1  | 3  | 5  | NA | NA | NA |
| Bone-Leiomyo   | 67bb70b2-b6f8-4aa9-80ce-48829f9fec56 | 5  | 11126533  | 11126614  | 7  | 81    | NA | NA | 7  | NA | NA | NA |
| Bone-Leiomyo   | 67bb70b2-b6f8-4aa9-80ce-48829f9fec56 | 5  | 18802703  | 18809366  | 31 | 6663  | 1  | 15 | 15 | NA | NA | NA |
| Bone-Leiomyo   | 67bb70b2-b6f8-4aa9-80ce-48829f9fec56 | 5  | 19610765  | 19611688  | 9  | 923   | NA | 7  | 2  | NA | NA | NA |
| Bone-Leiomyo   | 67bb70b2-b6f8-4aa9-80ce-48829f9fec56 | 5  | 20184536  | 20185772  | 11 | 1236  | 1  | 7  | 3  | NA | NA | NA |
| Bone-Leiomyo   | 67bb70b2-b6f8-4aa9-80ce-48829f9fec56 | 5  | 26249524  | 26250586  | 14 | 1062  | NA | 3  | 11 | NA | NA | NA |
| Bone-Leiomyo   | 67bb70b2-b6f8-4aa9-80ce-48829f9fec56 | 5  | 28776190  | 28777441  | 8  | 1251  | 1  | 3  | 4  | NA | NA | NA |
| Bone-Leiomyo   | 67bb70b2-b6f8-4aa9-80ce-48829f9fec56 | 12 | 54267537  | 54268323  | 6  | 786   | NA | 2  | 4  | NA | NA | NA |
| Bone-Leiomyo   | 67bb70b2-b6f8-4aa9-80ce-48829f9fec56 | 12 | 55350275  | 55355106  | 30 | 4831  | NA | 5  | 24 | NA | NA | 1  |
| Bone-Leiomyo   | 67bb70b2-b6f8-4aa9-80ce-48829f9fec56 | 12 | 57902562  | 57905200  | 8  | 2638  | NA | 2  | 6  | NA | NA | NA |
| Bone-Leiomyo   | 67bb70b2-b6f8-4aa9-80ce-48829f9fec56 | 12 | 61919609  | 61923486  | 9  | 3877  | 4  | 1  | 4  | NA | NA | NA |
| Bone-Leiomyo   | 67bb70b2-b6f8-4aa9-80ce-48829f9fec56 | 12 | 62557500  | 62561160  | 10 | 3660  | NA | 3  | 7  | NA | NA | NA |
| Bone-Leiomyo   | 67bb70b2-b6f8-4aa9-80ce-48829f9fec56 | 12 | 62599160  | 62603766  | 7  | 4606  | 1  | 4  | 2  | NA | NA | NA |
| Bone-Leiomyo   | 67bb70b2-b6f8-4aa9-80ce-48829f9fec56 | 12 | 66475866  | 66486973  | 31 | 11107 | 1  | 18 | 12 | NA | NA | NA |
| Bone-Leiomyo   | 67bb70b2-b6f8-4aa9-80ce-48829f9fec56 | 12 | 67124469  | 67128456  | 12 | 3987  | 1  | 8  | 3  | NA | NA | NA |
| Bone-Leiomyo   | 67bb70b2-b6f8-4aa9-80ce-48829f9fec56 | 12 | 67719446  | 67719941  | 7  | 495   | NA | 3  | 4  | NA | NA | NA |
| Bone-Leiomyo   | 67bb70b2-b6f8-4aa9-80ce-48829f9fec56 | 12 | 68385477  | 68386444  | 10 | 967   | NA | 5  | 5  | NA | NA | NA |
| Bone-Leiomyo   | 67bb70b2-b6f8-4aa9-80ce-48829f9fec56 | 12 | 68449081  | 68454060  | 9  | 4979  | 1  | 1  | 7  | NA | NA | NA |
| Bone-Leiomyo   | 67bb70b2-b6f8-4aa9-80ce-48829f9fec56 | 12 | 68975949  | 68977923  | 9  | 1974  | 2  | 5  | 2  | NA | NA | NA |
| Bone-Leiomyo   | 67bb70b2-b6f8-4aa9-80ce-48829f9fec56 | 12 | 69201146  | 69202860  | 11 | 1714  | NA | 3  | 8  | NA | NA | NA |
| Bone-Leiomyo   | 67bb70b2-b6f8-4aa9-80ce-48829f9fec56 | 12 | 69482161  | 69484737  | 7  | 2576  | 1  | NA | 6  | NA | NA | NA |
| Bone-Leiomyo   | 67bb70b2-b6f8-4aa9-80ce-48829f9fec56 | 12 | 69871889  | 69879280  | 10 | 7391  | NA | 6  | 4  | NA | NA | NA |
| Bone-Leiomyo   | 67bb70b2-b6f8-4aa9-80ce-48829f9fec56 | 12 | 70262983  | 70266359  | 17 | 3376  | 1  | 4  | 12 | NA | NA | NA |
| Bone-Leiomyo   | 67bb70b2-b6f8-4aa9-80ce-48829f9fec56 | 12 | 72231969  | 72237957  | 13 | 5988  | 1  | 7  | 5  | NA | NA | NA |
| Bone-Leiomyo   | 67bb70b2-b6f8-4aa9-80ce-48829f9fec56 | 12 | 72651189  | 72651676  | 7  | 487   | NA | 1  | 6  | NA | NA | NA |
| Bone-Leiomyo   | 67bb70b2-b6f8-4aa9-80ce-48829f9fec56 | 12 | 73859506  | 73862467  | 18 | 2961  | 4  | 4  | 10 | NA | NA | NA |
| Bone-Leiomyo   | 67bb70b2-b6f8-4aa9-80ce-48829f9fec56 | 12 | 74907969  | 74908478  | 8  | 509   | 1  | 2  | 5  | NA | NA | NA |
| Bone-Leiomyo   | 67bb70b2-b6f8-4aa9-80ce-48829f9fec56 | 12 | 86730037  | 86733004  | 25 | 2967  | 3  | 5  | 17 | NA | NA | NA |
| Bone-Leiomyo   | 67bb70b2-b6f8-4aa9-80ce-48829f9fec56 | 12 | 88501729  | 88505868  | 9  | 4139  | 1  | 2  | 6  | NA | NA | NA |
| Bone-Leiomyo   | 67bb70b2-b6f8-4aa9-80ce-48829f9fec56 | 12 | 88532056  | 88538404  | 8  | 6348  | 1  | 5  | 2  | NA | NA | NA |
| Bone-Leiomyo   | 67bb70b2-b6f8-4aa9-80ce-48829f9fec56 | 12 | 94452713  | 94456504  | 9  | 3791  | 1  | 5  | 3  | NA | NA | NA |
| Bone-Leiomyo   | 67bb70b2-b6f8-4aa9-80ce-48829f9fec56 | 12 | 101423981 | 101427944 | 16 | 3963  | 2  | 7  | 7  | NA | NA | NA |
| Bone-Leiomyo   | 67bb70b2-b6f8-4aa9-80ce-48829f9fec56 | 12 | 101589618 | 101592011 | 13 | 2393  | 1  | 6  | 6  | NA | NA | NA |
| Bone-Leiomyo   | 67bb70b2-b6f8-4aa9-80ce-48829f9fec56 | 12 | 101660401 | 101665487 | 7  | 5086  | NA | 3  | 4  | NA | NA | NA |
| Bone-Leiomyo   | 67bb70b2-b6f8-4aa9-80ce-48829f9fec56 | 12 | 101951791 | 101955654 | 12 | 3863  | NA | 4  | 8  | NA | NA | NA |
| Bone-Leiomyo   | 67bb70b2-b6f8-4aa9-80ce-48829f9fec56 | 12 | 102295379 | 102296765 | 7  | 1386  | NA | 4  | 3  | NA | NA | NA |
| Bone-Leiomyo   | 67bb70b2-b6f8-4aa9-80ce-48829f9fec56 | 12 | 105092632 | 105098950 | 9  | 6318  | 1  | 1  | 7  | NA | NA | NA |
| Bone-Leiomyo   | 67bb70b2-b6f8-4aa9-80ce-48829f9fec56 | 12 | 105153294 | 105154265 | 9  | 971   | NA | 1  | 8  | NA | NA | NA |
| Bone-Leiomyo   | 67bb70b2-b6f8-4aa9-80ce-48829f9fec56 | 12 | 125712353 | 125713859 | 8  | 1506  | NA | 3  | 5  | NA | NA | NA |
| Bone-Leiomyo   | 67bb70b2-b6f8-4aa9-80ce-48829f9fec56 | 12 | 127064130 | 127065639 | 9  | 1509  | 1  | 5  | 3  | NA | NA | NA |
| Bone-Leiomyo   | 67bb70b2-b6f8-4aa9-80ce-48829f9fec56 | 12 | 128128689 | 128132113 | 7  | 3424  | 1  | NA | 6  | NA | NA | NA |
| Bone-Leiomyo   | 67bb70b2-b6f8-4aa9-80ce-48829f9fec56 | 14 | 95960828  | 95961341  | 8  | 513   | NA | 3  | 5  | NA | NA | NA |
| Bone-Leiomyo   | 67bb70b2-b6f8-4aa9-80ce-48829f9fec56 | 14 | 98386094  | 98390194  | 7  | 4100  | 1  | 5  | 1  | NA | NA | NA |

|                 |                                      |    |           |           |    |       |    |    |    |    |    |    |
|-----------------|--------------------------------------|----|-----------|-----------|----|-------|----|----|----|----|----|----|
| Bone-Leiomyo    | 67bb70b2-b6f8-4aa9-80ce-48829f9fec56 | 14 | 98748279  | 98751461  | 7  | 3182  | NA | 2  | 5  | NA | NA | NA |
| Bone-Leiomyo    | 67bb70b2-b6f8-4aa9-80ce-48829f9fec56 | 15 | 40688419  | 40688816  | 10 | 397   | NA | NA | 10 | NA | NA | NA |
| Ovary-AdenoCA   | 6821446e-8e76-46fe-b0b9-47feb46d2585 | 19 | 41330113  | 41334552  | 17 | 4439  | NA | 13 | 4  | NA | NA | NA |
| Stomach-AdenoCA | 68509ede-3dcf-4a6e-9af0-4a9bb4dfa567 | 3  | 88738653  | 88742533  | 6  | 3880  | NA | NA | NA | 4  | 2  | NA |
| Stomach-AdenoCA | 68509ede-3dcf-4a6e-9af0-4a9bb4dfa567 | 8  | 47696313  | 47699130  | 6  | 2817  | NA | NA | 1  | NA | 5  | NA |
| Panc-AdenoCA    | 6867811f-ac89-47da-b5dc-1270033c36e7 | 1  | 2353486   | 2354982   | 6  | 1496  | NA | 3  | 3  | NA | NA | NA |
| Panc-AdenoCA    | 6867811f-ac89-47da-b5dc-1270033c36e7 | 3  | 87570029  | 87572868  | 8  | 2839  | 1  | 4  | 3  | NA | NA | NA |
| Panc-AdenoCA    | 6867811f-ac89-47da-b5dc-1270033c36e7 | 12 | 4538276   | 4541851   | 6  | 3575  | NA | 2  | 4  | NA | NA | NA |
| Panc-AdenoCA    | 6867811f-ac89-47da-b5dc-1270033c36e7 | 20 | 2911859   | 2913206   | 7  | 1347  | 2  | 2  | 3  | NA | NA | NA |
| Panc-AdenoCA    | 6867811f-ac89-47da-b5dc-1270033c36e7 | 21 | 20137823  | 20139824  | 10 | 2001  | NA | 3  | 7  | NA | NA | NA |
| Panc-AdenoCA    | 6867811f-ac89-47da-b5dc-1270033c36e7 | 21 | 31480476  | 31481508  | 10 | 1032  | 1  | 4  | 5  | NA | NA | NA |
| Lymph-BNHL      | 687baf0b-aed9-4ab2-adb6-556a1d177a24 | 2  | 89159095  | 89160139  | 12 | 1044  | NA | 2  | 3  | 2  | 3  | 2  |
| Lymph-BNHL      | 687baf0b-aed9-4ab2-adb6-556a1d177a24 | 11 | 2290198   | 2291956   | 7  | 1758  | NA | NA | 6  | NA | 1  | NA |
| Lymph-BNHL      | 687baf0b-aed9-4ab2-adb6-556a1d177a24 | 14 | 106324853 | 106330024 | 71 | 5171  | 2  | 15 | 24 | 14 | 7  | 9  |
| Lymph-BNHL      | 687baf0b-aed9-4ab2-adb6-556a1d177a24 | 14 | 107034934 | 107035121 | 11 | 187   | 2  | 1  | 6  | 1  | NA | 1  |
| Panc-AdenoCA    | 68ba1105-569a-4209-9b45-0e2d64931806 | 8  | 13641415  | 13642426  | 6  | 1011  | 1  | 3  | 2  | NA | NA | NA |
| Lung-AdenoCA    | 68c2a355-862c-4657-b296-5776ed8447b0 | 6  | 13877739  | 13878776  | 11 | 1037  | NA | 7  | 4  | NA | NA | NA |
| Lung-AdenoCA    | 68c2a355-862c-4657-b296-5776ed8447b0 | 6  | 28264604  | 28267292  | 18 | 2688  | 1  | 7  | 10 | NA | NA | NA |
| Lung-AdenoCA    | 68c2a355-862c-4657-b296-5776ed8447b0 | 17 | 8998407   | 8998855   | 8  | 448   | NA | NA | 7  | NA | 1  | NA |
| Lung-AdenoCA    | 68c2a355-862c-4657-b296-5776ed8447b0 | 17 | 16943712  | 16944536  | 12 | 824   | 1  | 5  | 5  | 1  | NA | NA |
| Lung-AdenoCA    | 68c2a355-862c-4657-b296-5776ed8447b0 | 20 | 34695699  | 34696073  | 6  | 374   | NA | NA | NA | 4  | 2  | NA |
| Liver-HCC       | 690e481c-c623-11e3-bf01-24c6515278c0 | 9  | 25502003  | 25502320  | 6  | 317   | 4  | NA | 2  | NA | NA | NA |
| Eso-AdenoCa     | 69c3c88c-d51e-4e03-b96b-ec4f1a0faa2d | 13 | 34706324  | 34709898  | 8  | 3574  | NA | 8  | NA | NA | NA | NA |
| Eso-AdenoCa     | 69c3c88c-d51e-4e03-b96b-ec4f1a0faa2d | 13 | 37510342  | 37513944  | 8  | 3602  | 4  | 1  | 3  | NA | NA | NA |
| Eso-AdenoCa     | 69c3c88c-d51e-4e03-b96b-ec4f1a0faa2d | 13 | 53707727  | 53711733  | 8  | 4006  | 4  | 3  | 1  | NA | NA | NA |
| Eso-AdenoCa     | 69c3c88c-d51e-4e03-b96b-ec4f1a0faa2d | 13 | 53716355  | 53724141  | 10 | 7786  | 3  | NA | 6  | NA | NA | 1  |
| Stomach-AdenoCA | 6a7cdaf6-211e-4eb8-a70e-1153d69c45e4 | 3  | 43475456  | 43475726  | 6  | 270   | 2  | 3  | 1  | NA | NA | NA |
| Stomach-AdenoCA | 6a7cdaf6-211e-4eb8-a70e-1153d69c45e4 | 6  | 39515142  | 39516243  | 8  | 1101  | 1  | 4  | 3  | NA | NA | NA |
| Stomach-AdenoCA | 6a7cdaf6-211e-4eb8-a70e-1153d69c45e4 | 7  | 25737300  | 25739625  | 6  | 2325  | NA | 3  | 3  | NA | NA | NA |
| Stomach-AdenoCA | 6a7cdaf6-211e-4eb8-a70e-1153d69c45e4 | 10 | 52008926  | 52009829  | 6  | 903   | NA | 5  | 1  | NA | NA | NA |
| Panc-AdenoCA    | 6ad44218-d34e-4126-bf56-1be2140cd3fb | 18 | 2374464   | 2375369   | 7  | 905   | NA | 4  | 3  | NA | NA | NA |
| Panc-AdenoCA    | 6ad44218-d34e-4126-bf56-1be2140cd3fb | 18 | 9190888   | 9191912   | 8  | 1024  | NA | 2  | 6  | NA | NA | NA |
| Panc-AdenoCA    | 6ad44218-d34e-4126-bf56-1be2140cd3fb | 19 | 28594960  | 28603853  | 13 | 8893  | NA | 4  | 9  | NA | NA | NA |
| Panc-AdenoCA    | 6ad44218-d34e-4126-bf56-1be2140cd3fb | 19 | 33725377  | 33725889  | 7  | 512   | NA | 2  | 5  | NA | NA | NA |
| Panc-AdenoCA    | 6ad44218-d34e-4126-bf56-1be2140cd3fb | 19 | 46741806  | 46745291  | 10 | 3485  | 1  | 1  | 6  | 1  | 1  | NA |
| Panc-AdenoCA    | 6b20f942-7b89-497c-8a2e-ccce74d20ca9 | 16 | 80614795  | 80616255  | 11 | 1460  | 3  | 2  | 6  | NA | NA | NA |
| Panc-AdenoCA    | 6b20f942-7b89-497c-8a2e-ccce74d20ca9 | 19 | 40468723  | 40472628  | 6  | 3905  | 1  | 3  | 2  | NA | NA | NA |
| Panc-AdenoCA    | 6b20f942-7b89-497c-8a2e-ccce74d20ca9 | 22 | 18324397  | 18324532  | 6  | 135   | NA | NA | 6  | NA | NA | NA |
| Panc-AdenoCA    | 6b20f942-7b89-497c-8a2e-ccce74d20ca9 | 22 | 42650910  | 42652022  | 24 | 1112  | NA | NA | 24 | NA | NA | NA |
| Liver-HCC       | 6b25a78f-20dc-4ccc-b4c0-f9885d16725d | 5  | 42194892  | 42196021  | 13 | 1129  | 1  | 6  | 6  | NA | NA | NA |
| Liver-HCC       | 6b50391f-d890-4ca0-b942-beab0f8bf1c9 | 6  | 82945666  | 82945811  | 6  | 145   | 1  | 1  | 3  | 1  | NA | NA |
| Head-SCC        | 6bbd66dd-efee-4d6e-b02f-f88e98526b82 | 2  | 164657660 | 164658418 | 9  | 758   | NA | 6  | 3  | NA | NA | NA |
| Head-SCC        | 6bbd66dd-efee-4d6e-b02f-f88e98526b82 | Y  | 6788147   | 6790977   | 8  | 2830  | NA | 3  | 5  | NA | NA | NA |
| Kidney-RCC      | 6bd4bca3-e568-4d1b-8b42-401fdf13d751 | 3  | 70742795  | 70744353  | 20 | 1558  | 4  | 6  | 10 | NA | NA | NA |
| Kidney-RCC      | 6bd4bca3-e568-4d1b-8b42-401fdf13d751 | 4  | 161911302 | 161915565 | 6  | 4263  | NA | NA | 1  | 3  | NA | 2  |
| Kidney-RCC      | 6bd4bca3-e568-4d1b-8b42-401fdf13d751 | 8  | 56812371  | 56814408  | 7  | 2037  | 2  | 1  | 4  | NA | NA | NA |
| Panc-AdenoCA    | 6bdf00f6-670f-466e-87fb-e853e41f000e | 3  | 146951246 | 146955724 | 16 | 4478  | 3  | 4  | 9  | NA | NA | NA |
| Liver-HCC       | 6c306cbe-c623-11e3-bf01-24c6515278c0 | 5  | 19672442  | 19675373  | 8  | 2931  | NA | NA | 1  | 4  | NA | 3  |
| Ovary-AdenoCA   | 6c31d730-1734-44ac-92b3-760981528723 | 4  | 189284323 | 189286861 | 9  | 2538  | NA | 4  | 5  | NA | NA | NA |
| Ovary-AdenoCA   | 6c31d730-1734-44ac-92b3-760981528723 | 19 | 13168850  | 13170241  | 12 | 1391  | 4  | 7  | 1  | NA | NA | NA |
| Ovary-AdenoCA   | 6c31d730-1734-44ac-92b3-760981528723 | 19 | 18053943  | 18058005  | 9  | 4062  | NA | 7  | 2  | NA | NA | NA |
| Ovary-AdenoCA   | 6c31d730-1734-44ac-92b3-760981528723 | 20 | 6121292   | 6137485   | 45 | 16193 | 6  | 20 | 17 | NA | 2  | NA |
| Breast-AdenoCa  | 6c65cb6d-8c50-4c7c-bc84-eeebe09fbe01 | 1  | 62455200  | 62457340  | 10 | 2140  | NA | 1  | 2  | 2  | 5  | NA |
| Breast-AdenoCa  | 6c65cb6d-8c50-4c7c-bc84-eeebe09fbe01 | 1  | 183237022 | 183264526 | 64 | 27504 | NA | 1  | 63 | NA | NA | NA |
| Breast-AdenoCa  | 6c65cb6d-8c50-4c7c-bc84-eeebe09fbe01 | 1  | 186585904 | 186587263 | 14 | 1359  | NA | 1  | 13 | NA | NA | NA |
| Breast-AdenoCa  | 6c65cb6d-8c50-4c7c-bc84-eeebe09fbe01 | 1  | 192506935 | 192521384 | 19 | 14449 | NA | 1  | 18 | NA | NA | NA |
| Breast-AdenoCa  | 6c65cb6d-8c50-4c7c-bc84-eeebe09fbe01 | 1  | 209719376 | 209727217 | 15 | 7841  | NA | NA | 15 | NA | NA | NA |
| Breast-AdenoCa  | 6c8e9197-fd16-4fed-bfda-e349cab26314 | 1  | 156408172 | 156412259 | 7  | 4087  | 1  | 2  | 4  | NA | NA | NA |
| Breast-AdenoCa  | 6c8e9197-fd16-4fed-bfda-e349cab26314 | 6  | 84548412  | 84571054  | 24 | 22642 | 2  | 1  | 21 | NA | NA | NA |
| Breast-AdenoCa  | 6c8e9197-fd16-4fed-bfda-e349cab26314 | 8  | 68751775  | 68751989  | 9  | 214   | NA | NA | 9  | NA | NA | NA |



|                  |                                      |    |           |           |    |       |    |    |    |    |    |    |
|------------------|--------------------------------------|----|-----------|-----------|----|-------|----|----|----|----|----|----|
| Breast-AdenoCa   | 6c8e9197-fd16-4fed-bfda-e349cab26314 | 8  | 108159791 | 108161672 | 10 | 1881  | NA | 4  | 6  | NA | NA | NA |
| Breast-AdenoCa   | 6c8e9197-fd16-4fed-bfda-e349cab26314 | 8  | 108324806 | 108325102 | 7  | 296   | NA | 5  | 2  | NA | NA | NA |
| Breast-AdenoCa   | 6c8e9197-fd16-4fed-bfda-e349cab26314 | 8  | 113789079 | 113794596 | 14 | 5517  | 1  | 2  | 11 | NA | NA | NA |
| Breast-AdenoCa   | 6c8e9197-fd16-4fed-bfda-e349cab26314 | 8  | 114134944 | 114138379 | 13 | 3435  | 2  | 3  | 8  | NA | NA | NA |
| Breast-AdenoCa   | 6c8e9197-fd16-4fed-bfda-e349cab26314 | 8  | 114943452 | 114944302 | 8  | 850   | NA | 6  | 2  | NA | NA | NA |
| Breast-AdenoCa   | 6c8e9197-fd16-4fed-bfda-e349cab26314 | 9  | 28897179  | 28897185  | 6  | 6     | 1  | 1  | 1  | 1  | NA | 2  |
| Breast-AdenoCa   | 6c8e9197-fd16-4fed-bfda-e349cab26314 | 9  | 35096976  | 35101259  | 7  | 4283  | 1  | NA | 6  | NA | NA | NA |
| Breast-AdenoCa   | 6c8e9197-fd16-4fed-bfda-e349cab26314 | 9  | 35119328  | 35167522  | 52 | 48194 | 4  | 6  | 40 | NA | NA | 2  |
| Breast-AdenoCa   | 6c8e9197-fd16-4fed-bfda-e349cab26314 | X  | 33565318  | 33570174  | 7  | 4856  | NA | NA | 6  | NA | NA | 1  |
| Ovary-AdenoCA    | 6ce42746-88aa-485f-a1c4-1759aad95914 | 10 | 33024929  | 33029792  | 7  | 4863  | 2  | 2  | 2  | NA | NA | 1  |
| Ovary-AdenoCA    | 6ce42746-88aa-485f-a1c4-1759aad95914 | 11 | 50734258  | 50739628  | 9  | 5370  | 4  | 3  | 2  | NA | NA | NA |
| Ovary-AdenoCA    | 6ce42746-88aa-485f-a1c4-1759aad95914 | 19 | 40035815  | 40040483  | 6  | 4668  | 1  | NA | 5  | NA | NA | NA |
| Lymph-CLL        | 6cfce053-bfd6-4ca0-b74b-b2e4549e411f | 2  | 89159564  | 89161387  | 22 | 1823  | 1  | 4  | 4  | 9  | 4  | NA |
| Lymph-CLL        | 6cfce053-bfd6-4ca0-b74b-b2e4549e411f | 2  | 89185049  | 89185451  | 12 | 402   | NA | 1  | 3  | 6  | NA | 2  |
| Lymph-CLL        | 6cfce053-bfd6-4ca0-b74b-b2e4549e411f | 14 | 106326566 | 106330421 | 23 | 3855  | 1  | 4  | 4  | 10 | 2  | 2  |
| Lymph-CLL        | 6cfce053-bfd6-4ca0-b74b-b2e4549e411f | 14 | 106829866 | 106830539 | 9  | 673   | NA | 2  | NA | 4  | 2  | 1  |
| Prost-AdenoCA    | 6d936ef9-b5df-44d3-831f-528bf8ddc131 | X  | 66195531  | 66197340  | 6  | 1809  | NA | 3  | 2  | NA | 1  | NA |
| Prost-AdenoCA    | 6d936ef9-b5df-44d3-831f-528bf8ddc131 | X  | 83966025  | 83967682  | 7  | 1657  | 1  | NA | 3  | 1  | 1  | 1  |
| Stomach-AdenoCA  | 6dbc113-d4cf-4db5-97c9-50fa400bb47e  | 7  | 55481535  | 55493556  | 15 | 12021 | 1  | 2  | 11 | NA | 1  | NA |
| Stomach-AdenoCA  | 6dbc113-d4cf-4db5-97c9-50fa400bb47e  | 13 | 59407890  | 59412340  | 7  | 4450  | NA | NA | NA | 1  | 4  | 2  |
| Stomach-AdenoCA  | 6dbc113-d4cf-4db5-97c9-50fa400bb47e  | 17 | 33158002  | 33158678  | 6  | 676   | 1  | 5  | NA | NA | NA | NA |
| Breast-LobularCa | 6dbc5c31-043b-40e9-bf1a-e7b4ec351b4d | 3  | 40426505  | 40427582  | 10 | 1077  | 1  | 8  | NA | NA | NA | 1  |
| Breast-LobularCa | 6dbc5c31-043b-40e9-bf1a-e7b4ec351b4d | 17 | 62600071  | 62608193  | 14 | 8122  | 3  | 7  | 4  | NA | NA | NA |
| CNS-GBM          | 6de41ac1-229b-40b9-a494-5588c284351d | 6  | 115589785 | 115590362 | 7  | 577   | NA | 5  | 2  | NA | NA | NA |
| CNS-GBM          | 6de41ac1-229b-40b9-a494-5588c284351d | 19 | 43933334  | 43937605  | 6  | 4271  | 1  | 4  | 1  | NA | NA | NA |
| Liver-HCC        | 6e6ad1a2-f1eb-44d1-9852-f5752afc5eb  | 19 | 45143158  | 45144777  | 7  | 1619  | NA | NA | 7  | NA | NA | NA |
| Liver-HCC        | 6e6ad1a2-f1eb-44d1-9852-f5752afc5eb  | 19 | 51309747  | 51312194  | 8  | 2447  | NA | 1  | 7  | NA | NA | NA |
| Liver-HCC        | 6e6ad1a2-f1eb-44d1-9852-f5752afc5eb  | 19 | 51318870  | 51323027  | 8  | 4157  | 1  | NA | 7  | NA | NA | NA |
| Liver-HCC        | 6e6ad1a2-f1eb-44d1-9852-f5752afc5eb  | 19 | 58255194  | 58265306  | 13 | 10112 | 1  | 6  | 6  | NA | NA | NA |
| Panc-Endocrine   | 6e776415-ddf4-4060-953f-08ef22441234 | 5  | 58564378  | 58567573  | 15 | 3195  | 1  | 8  | 6  | NA | NA | NA |
| Panc-Endocrine   | 6e776415-ddf4-4060-953f-08ef22441234 | 5  | 58789835  | 58794762  | 11 | 4927  | NA | 4  | 4  | 3  | NA | NA |
| Panc-Endocrine   | 6e776415-ddf4-4060-953f-08ef22441234 | 11 | 61242110  | 61243672  | 10 | 1562  | NA | 5  | 5  | NA | NA | NA |
| Panc-Endocrine   | 6e776415-ddf4-4060-953f-08ef22441234 | 12 | 114163035 | 114163265 | 6  | 230   | 1  | 2  | 2  | 1  | NA | NA |
| Panc-Endocrine   | 6e776415-ddf4-4060-953f-08ef22441234 | 18 | 18902439  | 18904198  | 13 | 1759  | 2  | 7  | 4  | NA | NA | NA |
| Breast-AdenoCa   | 6e839eaf-1dbb-43f5-8846-c980e05540c7 | 5  | 56807677  | 56812850  | 18 | 5173  | NA | 1  | 17 | NA | NA | NA |
| Breast-AdenoCa   | 6e839eaf-1dbb-43f5-8846-c980e05540c7 | 5  | 58796205  | 58797396  | 13 | 1191  | NA | 6  | 7  | NA | NA | NA |
| Breast-AdenoCa   | 6e839eaf-1dbb-43f5-8846-c980e05540c7 | 6  | 70814337  | 70815481  | 7  | 1144  | 2  | 5  | NA | NA | NA | NA |
| Breast-AdenoCa   | 6e839eaf-1dbb-43f5-8846-c980e05540c7 | 14 | 31820204  | 31821127  | 8  | 923   | 1  | 3  | 4  | NA | NA | NA |
| Breast-AdenoCa   | 6e839eaf-1dbb-43f5-8846-c980e05540c7 | 15 | 100523947 | 100529247 | 11 | 5300  | NA | 9  | 2  | NA | NA | NA |
| Breast-AdenoCa   | 6e839eaf-1dbb-43f5-8846-c980e05540c7 | 15 | 100538989 | 100542305 | 10 | 3316  | NA | 7  | 3  | NA | NA | NA |
| Breast-AdenoCa   | 6e839eaf-1dbb-43f5-8846-c980e05540c7 | 17 | 47591265  | 47595550  | 6  | 4285  | 1  | 3  | 2  | NA | NA | NA |
| Breast-AdenoCa   | 6e839eaf-1dbb-43f5-8846-c980e05540c7 | 18 | 22115516  | 22118272  | 7  | 2756  | 1  | 3  | 3  | NA | NA | NA |
| Liver-HCC        | 6ec4456e-c622-11e3-bf01-24c6515278c0 | 21 | 17026108  | 17027567  | 13 | 1459  | 3  | 4  | 6  | NA | NA | NA |
| Biliary-AdenoCA  | 6f395380-c623-11e3-bf01-24c6515278c0 | 9  | 24263285  | 24264671  | 7  | 1386  | NA | 4  | 3  | NA | NA | NA |
| Biliary-AdenoCA  | 6f395380-c623-11e3-bf01-24c6515278c0 | 14 | 24895091  | 24895140  | 6  | 49    | NA | NA | NA | 2  | 4  | NA |
| Ovary-AdenoCA    | 6f981023-4269-4e8e-a4ab-2c92bb27273c | 20 | 62822554  | 62825445  | 6  | 2891  | 2  | 3  | 1  | NA | NA | NA |
| Panc-AdenoCA     | 6fc0cb07-9713-4355-8543-f85d1c5505c2 | 4  | 55403932  | 55415209  | 21 | 11277 | 2  | 10 | 8  | NA | 1  | NA |
| Panc-AdenoCA     | 6fc0cb07-9713-4355-8543-f85d1c5505c2 | 8  | 83159324  | 83160458  | 8  | 1134  | 5  | NA | 3  | NA | NA | NA |
| Panc-AdenoCA     | 6fc0cb07-9713-4355-8543-f85d1c5505c2 | 8  | 87631503  | 87632337  | 9  | 834   | 1  | 2  | 6  | NA | NA | NA |
| Panc-AdenoCA     | 6fc0cb07-9713-4355-8543-f85d1c5505c2 | 8  | 146229307 | 146230888 | 9  | 1581  | 4  | 1  | 4  | NA | NA | NA |
| Panc-AdenoCA     | 6fc0cb07-9713-4355-8543-f85d1c5505c2 | 12 | 22449187  | 22452762  | 7  | 3575  | NA | 3  | 4  | NA | NA | NA |
| Panc-AdenoCA     | 6fc0cb07-9713-4355-8543-f85d1c5505c2 | 18 | 329762    | 335526    | 19 | 5764  | 4  | 6  | 9  | NA | NA | NA |
| Panc-AdenoCA     | 6fc0cb07-9713-4355-8543-f85d1c5505c2 | 18 | 10289967  | 10293219  | 13 | 3252  | 1  | 4  | 8  | NA | NA | NA |
| Panc-AdenoCA     | 6fc0cb07-9713-4355-8543-f85d1c5505c2 | 18 | 10982438  | 10982880  | 9  | 442   | 3  | 1  | 5  | NA | NA | NA |
| Liver-HCC        | 70422e6d-cb1f-4284-8be9-1d4517ffad60 | 17 | 12713372  | 12716443  | 7  | 3071  | NA | 1  | 4  | NA | 1  | 1  |
| Eso-AdenoCa      | 708e21ac-f529-4461-bc4f-d3a194a92b80 | 18 | 18647446  | 18648375  | 8  | 929   | NA | 5  | 3  | NA | NA | NA |
| Panc-AdenoCA     | 70dd8453-11d3-4105-a8d0-6a755c52495d | 2  | 225998943 | 225999211 | 10 | 268   | 2  | 1  | 7  | NA | NA | NA |
| Panc-AdenoCA     | 70dd8453-11d3-4105-a8d0-6a755c52495d | 4  | 137867005 | 137870281 | 13 | 3276  | NA | 6  | 7  | NA | NA | NA |
| Panc-AdenoCA     | 70dd8453-11d3-4105-a8d0-6a755c52495d | 13 | 76238094  | 76239830  | 6  | 1736  | NA | NA | 5  | NA | NA | 1  |
| Panc-AdenoCA     | 70dd8453-11d3-4105-a8d0-6a755c52495d | X  | 94138831  | 94139598  | 6  | 767   | NA | 3  | 3  | NA | NA | NA |

|                 |                                      |    |           |           |    |       |    |    |    |    |    |    |
|-----------------|--------------------------------------|----|-----------|-----------|----|-------|----|----|----|----|----|----|
| Stomach-AdenoCA | 7116cc90-f465-4e7e-aa27-48a83ed258e9 | 17 | 19771445  | 19775336  | 6  | 3891  | 1  | 4  | NA | NA | 1  | NA |
| Stomach-AdenoCA | 7116cc90-f465-4e7e-aa27-48a83ed258e9 | 21 | 19115745  | 19116177  | 6  | 432   | NA | 5  | 1  | NA | NA | NA |
| Head-SCC        | 7158c9fd-a633-4fef-aa23-bd285f2a87a8 | 12 | 56504766  | 56506247  | 6  | 1481  | 1  | 3  | 2  | NA | NA | NA |
| Lymph-BNHL      | 71982a1b-52a4-440f-bd5d-62a0e6cc7fd9 | 6  | 91004705  | 91005806  | 12 | 1101  | 2  | 4  | 1  | 2  | 2  | 1  |
| Lymph-BNHL      | 71982a1b-52a4-440f-bd5d-62a0e6cc7fd9 | 8  | 128748551 | 128763492 | 42 | 14941 | 6  | 15 | 13 | 4  | 3  | 1  |
| Lymph-BNHL      | 71982a1b-52a4-440f-bd5d-62a0e6cc7fd9 | 12 | 122458647 | 122462101 | 12 | 3454  | 1  | 3  | 4  | 2  | NA | 2  |
| Lymph-BNHL      | 71982a1b-52a4-440f-bd5d-62a0e6cc7fd9 | 13 | 75979979  | 75984337  | 8  | 4358  | NA | NA | 3  | 3  | NA | 2  |
| Lymph-BNHL      | 71982a1b-52a4-440f-bd5d-62a0e6cc7fd9 | 14 | 106068001 | 106070048 | 6  | 2047  | NA | 1  | 5  | NA | NA | NA |
| Lymph-BNHL      | 71982a1b-52a4-440f-bd5d-62a0e6cc7fd9 | 14 | 106326619 | 106358414 | 77 | 31795 | 7  | 17 | 18 | 12 | 6  | 17 |
| Lymph-BNHL      | 71982a1b-52a4-440f-bd5d-62a0e6cc7fd9 | 14 | 106877741 | 106878788 | 18 | 1047  | NA | 1  | 3  | 7  | 4  | 3  |
| Lymph-BNHL      | 71982a1b-52a4-440f-bd5d-62a0e6cc7fd9 | 16 | 11348263  | 11349626  | 8  | 1363  | 2  | 3  | 1  | 1  | 1  | NA |
| Lymph-BNHL      | 71982a1b-52a4-440f-bd5d-62a0e6cc7fd9 | 22 | 22378922  | 22380602  | 6  | 1680  | 1  | NA | NA | 2  | 1  | 2  |
| Lymph-BNHL      | 71982a1b-52a4-440f-bd5d-62a0e6cc7fd9 | 22 | 23263800  | 23264775  | 50 | 975   | 5  | 14 | 14 | 8  | 4  | 5  |
| Panc-AdenoCA    | 71ef8379-03a0-4b81-92c9-1ba666fe4d7a | 2  | 88492252  | 88492404  | 8  | 152   | NA | 2  | 6  | NA | NA | NA |
| Panc-AdenoCA    | 71ef8379-03a0-4b81-92c9-1ba666fe4d7a | 18 | 3825539   | 3827924   | 7  | 2385  | 1  | 2  | 4  | NA | NA | NA |
| Panc-AdenoCA    | 71ef8379-03a0-4b81-92c9-1ba666fe4d7a | 18 | 10510871  | 10514614  | 7  | 3743  | 1  | 1  | 5  | NA | NA | NA |
| Panc-AdenoCA    | 71ef8379-03a0-4b81-92c9-1ba666fe4d7a | 18 | 10789265  | 10794068  | 8  | 4803  | 3  | 2  | 3  | NA | NA | NA |
| Panc-AdenoCA    | 71ef8379-03a0-4b81-92c9-1ba666fe4d7a | 18 | 20984146  | 20988001  | 7  | 3855  | NA | 1  | 6  | NA | NA | NA |
| Panc-AdenoCA    | 71ef8379-03a0-4b81-92c9-1ba666fe4d7a | 18 | 24744349  | 24744958  | 9  | 609   | 3  | 2  | 4  | NA | NA | NA |
| Panc-AdenoCA    | 71ef8379-03a0-4b81-92c9-1ba666fe4d7a | 19 | 49941523  | 49942220  | 12 | 697   | 2  | 6  | 4  | NA | NA | NA |
| Panc-AdenoCA    | 71ef8379-03a0-4b81-92c9-1ba666fe4d7a | 19 | 52346948  | 52347243  | 9  | 295   | 2  | 1  | 6  | NA | NA | NA |
| Panc-AdenoCA    | 71ef8379-03a0-4b81-92c9-1ba666fe4d7a | 19 | 52365045  | 52368306  | 10 | 3261  | 2  | 1  | 7  | NA | NA | NA |
| Breast-AdenoCa  | 71fda5a9-7049-406f-9348-2c24f7ddf5f4 | 1  | 176545232 | 176547241 | 7  | 2009  | 3  | NA | 4  | NA | NA | NA |
| Breast-AdenoCa  | 71fda5a9-7049-406f-9348-2c24f7ddf5f4 | 12 | 86960602  | 86961914  | 9  | 1312  | 3  | 2  | 4  | NA | NA | NA |
| Liver-HCC       | 7260f57c-c623-11e3-bf01-24c6515278c0 | 12 | 109309920 | 109311154 | 8  | 1234  | 1  | 3  | 4  | NA | NA | NA |
| Panc-AdenoCA    | 7266ec7b-4824-4b88-910e-e9bfb848d55f | 18 | 23036647  | 23040751  | 9  | 4104  | NA | 1  | 8  | NA | NA | NA |
| Panc-AdenoCA    | 72a5e569-99d4-47bc-be1b-6296a5025080 | 18 | 20375607  | 20385726  | 24 | 10119 | 2  | 16 | 6  | NA | NA | NA |
| Bone-Leiomyo    | 72f0a49a-aec8-47e5-846a-956c4da1507c | 2  | 133938970 | 133940107 | 6  | 1137  | 1  | NA | 5  | NA | NA | NA |
| Bone-Leiomyo    | 72f0a49a-aec8-47e5-846a-956c4da1507c | 2  | 242339599 | 242342388 | 7  | 2789  | 1  | 1  | 5  | NA | NA | NA |
| Bone-Leiomyo    | 72f0a49a-aec8-47e5-846a-956c4da1507c | 3  | 1842807   | 1843911   | 14 | 1104  | 3  | 5  | 4  | NA | 1  | 1  |
| Bone-Leiomyo    | 72f0a49a-aec8-47e5-846a-956c4da1507c | 4  | 187111892 | 187113423 | 13 | 1531  | 1  | 1  | 11 | NA | NA | NA |
| Bone-Leiomyo    | 72f0a49a-aec8-47e5-846a-956c4da1507c | 5  | 101819840 | 101820264 | 6  | 424   | 1  | 3  | 2  | NA | NA | NA |
| Bone-Leiomyo    | 72f0a49a-aec8-47e5-846a-956c4da1507c | 5  | 109176037 | 109177538 | 11 | 1501  | 4  | 2  | 5  | NA | NA | NA |
| Bone-Leiomyo    | 72f0a49a-aec8-47e5-846a-956c4da1507c | 5  | 135041005 | 135043628 | 14 | 2623  | 2  | 1  | 11 | NA | NA | NA |
| Bone-Leiomyo    | 72f0a49a-aec8-47e5-846a-956c4da1507c | 6  | 161499193 | 161503349 | 11 | 4156  | 3  | 3  | 5  | NA | NA | NA |
| Bone-Leiomyo    | 72f0a49a-aec8-47e5-846a-956c4da1507c | 7  | 22117307  | 22117755  | 9  | 448   | 1  | 2  | 6  | NA | NA | NA |
| Bone-Leiomyo    | 72f0a49a-aec8-47e5-846a-956c4da1507c | 8  | 67971695  | 67972147  | 8  | 452   | NA | NA | 8  | NA | NA | NA |
| Bone-Leiomyo    | 72f0a49a-aec8-47e5-846a-956c4da1507c | 8  | 100594950 | 100602460 | 10 | 7510  | NA | 5  | 5  | NA | NA | NA |
| Bone-Leiomyo    | 72f0a49a-aec8-47e5-846a-956c4da1507c | 9  | 130666118 | 130671154 | 7  | 5036  | 2  | 2  | 3  | NA | NA | NA |
| Bone-Leiomyo    | 72f0a49a-aec8-47e5-846a-956c4da1507c | 9  | 130768698 | 130778931 | 18 | 10233 | 3  | 5  | 10 | NA | NA | NA |
| Bone-Leiomyo    | 72f0a49a-aec8-47e5-846a-956c4da1507c | 9  | 131945073 | 131950838 | 15 | 5765  | 2  | 6  | 7  | NA | NA | NA |
| Bone-Leiomyo    | 72f0a49a-aec8-47e5-846a-956c4da1507c | 9  | 135941010 | 135941717 | 10 | 707   | NA | 5  | 5  | NA | NA | NA |
| Bone-Leiomyo    | 72f0a49a-aec8-47e5-846a-956c4da1507c | 10 | 21990540  | 21994022  | 7  | 3482  | 3  | 1  | 3  | NA | NA | NA |
| Bone-Leiomyo    | 72f0a49a-aec8-47e5-846a-956c4da1507c | 11 | 36442260  | 36442859  | 7  | 599   | 1  | 4  | 2  | NA | NA | NA |
| Bone-Leiomyo    | 72f0a49a-aec8-47e5-846a-956c4da1507c | 11 | 43052852  | 43054732  | 10 | 1880  | NA | 3  | 7  | NA | NA | NA |
| Bone-Leiomyo    | 72f0a49a-aec8-47e5-846a-956c4da1507c | 11 | 90284100  | 90288531  | 14 | 4431  | NA | 1  | 13 | NA | NA | NA |
| Bone-Leiomyo    | 72f0a49a-aec8-47e5-846a-956c4da1507c | 11 | 98137746  | 98140906  | 7  | 3160  | NA | NA | 6  | NA | 1  | NA |
| Bone-Leiomyo    | 72f0a49a-aec8-47e5-846a-956c4da1507c | 11 | 99529253  | 99531894  | 9  | 2641  | 1  | 5  | 3  | NA | NA | NA |
| Bone-Leiomyo    | 72f0a49a-aec8-47e5-846a-956c4da1507c | 11 | 102546754 | 102547498 | 7  | 744   | 2  | 1  | 3  | NA | NA | 1  |
| Bone-Leiomyo    | 72f0a49a-aec8-47e5-846a-956c4da1507c | 12 | 58419782  | 58421548  | 6  | 1766  | NA | 3  | 3  | NA | NA | NA |
| Bone-Leiomyo    | 72f0a49a-aec8-47e5-846a-956c4da1507c | 12 | 66440610  | 66445359  | 11 | 4749  | 2  | 2  | 6  | NA | NA | 1  |
| Bone-Leiomyo    | 72f0a49a-aec8-47e5-846a-956c4da1507c | 12 | 68824537  | 68825309  | 7  | 772   | 1  | 3  | 3  | NA | NA | NA |
| Bone-Leiomyo    | 72f0a49a-aec8-47e5-846a-956c4da1507c | 12 | 69799415  | 69802586  | 8  | 3171  | 1  | 2  | 5  | NA | NA | NA |
| Bone-Leiomyo    | 72f0a49a-aec8-47e5-846a-956c4da1507c | 12 | 69865382  | 69869838  | 7  | 4456  | 1  | 3  | 3  | NA | NA | NA |
| Bone-Leiomyo    | 72f0a49a-aec8-47e5-846a-956c4da1507c | 12 | 71768670  | 71778236  | 30 | 9566  | NA | 2  | 28 | NA | NA | NA |
| Bone-Leiomyo    | 72f0a49a-aec8-47e5-846a-956c4da1507c | 12 | 73948981  | 73953866  | 21 | 4885  | 1  | 2  | 18 | NA | NA | NA |
| Bone-Leiomyo    | 72f0a49a-aec8-47e5-846a-956c4da1507c | 12 | 88489516  | 88494779  | 7  | 5263  | 1  | NA | 6  | NA | NA | NA |
| Bone-Leiomyo    | 72f0a49a-aec8-47e5-846a-956c4da1507c | 12 | 88507950  | 88509392  | 17 | 1442  | NA | NA | 17 | NA | NA | NA |
| Bone-Leiomyo    | 72f0a49a-aec8-47e5-846a-956c4da1507c | 14 | 53033663  | 53035417  | 7  | 1754  | 3  | 3  | 1  | NA | NA | NA |
| Bone-Leiomyo    | 72f0a49a-aec8-47e5-846a-956c4da1507c | 17 | 6159360   | 6169060   | 11 | 9700  | NA | 4  | 6  | NA | 1  | NA |

|                |                                       |    |           |           |    |       |    |    |    |    |    |    |
|----------------|---------------------------------------|----|-----------|-----------|----|-------|----|----|----|----|----|----|
| Bone-Leiomyo   | 72f0a49a-aec8-47e5-846a-956c4da1507c  | 17 | 7639889   | 7642475   | 7  | 2586  | 1  | 2  | 4  | NA | NA | NA |
| Bone-Leiomyo   | 72f0a49a-aec8-47e5-846a-956c4da1507c  | 17 | 39837174  | 39840674  | 7  | 3500  | 1  | 1  | 5  | NA | NA | NA |
| Bone-Leiomyo   | 72f0a49a-aec8-47e5-846a-956c4da1507c  | 17 | 41112505  | 41113097  | 8  | 592   | 2  | 4  | 2  | NA | NA | NA |
| Bone-Leiomyo   | 72f0a49a-aec8-47e5-846a-956c4da1507c  | 17 | 50949964  | 50951018  | 15 | 1054  | NA | NA | 15 | NA | NA | NA |
| Bone-Leiomyo   | 72f0a49a-aec8-47e5-846a-956c4da1507c  | 17 | 66897443  | 66899367  | 7  | 1924  | 4  | 1  | 2  | NA | NA | NA |
| Bone-Leiomyo   | 72f0a49a-aec8-47e5-846a-956c4da1507c  | 18 | 4921845   | 4926510   | 8  | 4665  | 1  | 3  | 4  | NA | NA | NA |
| Bone-Leiomyo   | 72f0a49a-aec8-47e5-846a-956c4da1507c  | 18 | 37906866  | 37907951  | 8  | 1085  | 2  | 2  | 4  | NA | NA | NA |
| Bone-Leiomyo   | 72f0a49a-aec8-47e5-846a-956c4da1507c  | 20 | 61079644  | 61082019  | 13 | 2375  | 1  | 1  | 11 | NA | NA | NA |
| Bone-Leiomyo   | 72f0a49a-aec8-47e5-846a-956c4da1507c  | 20 | 61649873  | 61653112  | 11 | 3239  | 1  | 3  | 7  | NA | NA | NA |
| Bone-Leiomyo   | 72f0a49a-aec8-47e5-846a-956c4da1507c  | 22 | 38575734  | 38580093  | 6  | 4359  | 1  | 3  | 2  | NA | NA | NA |
| Bone-Leiomyo   | 72f0a49a-aec8-47e5-846a-956c4da1507c  | 22 | 47382178  | 47386672  | 10 | 4494  | 4  | 5  | 1  | NA | NA | NA |
| Bone-Leiomyo   | 72f0a49a-aec8-47e5-846a-956c4da1507c  | X  | 20263544  | 20266006  | 10 | 2462  | 1  | 2  | 7  | NA | NA | NA |
| Bone-Leiomyo   | 72f0a49a-aec8-47e5-846a-956c4da1507c  | X  | 21168456  | 21170896  | 9  | 2440  | 2  | 1  | 5  | 1  | NA | NA |
| Bone-Leiomyo   | 72f0a49a-aec8-47e5-846a-956c4da1507c  | X  | 35863047  | 35867507  | 7  | 4460  | NA | 2  | 5  | NA | NA | NA |
| Bone-Leiomyo   | 72f0a49a-aec8-47e5-846a-956c4da1507c  | X  | 73547157  | 73547915  | 8  | 758   | 1  | 5  | 2  | NA | NA | NA |
| Bone-Leiomyo   | 72f0a49a-aec8-47e5-846a-956c4da1507c  | X  | 73849823  | 73851681  | 7  | 1858  | 1  | NA | 6  | NA | NA | NA |
| Panc-AdenoCA   | 72f82fbd-9838-4082-b605-bc3d80226f16  | 1  | 244327402 | 244328037 | 9  | 635   | NA | NA | 9  | NA | NA | NA |
| Panc-AdenoCA   | 72f82fbd-9838-4082-b605-bc3d80226f16  | 3  | 30643856  | 30645010  | 6  | 1154  | 1  | NA | 5  | NA | NA | NA |
| Panc-AdenoCA   | 72f82fbd-9838-4082-b605-bc3d80226f16  | 6  | 48129376  | 48130276  | 23 | 900   | NA | 1  | 22 | NA | NA | NA |
| Panc-AdenoCA   | 73058c80-607e-4b55-b112-8f8f6775d014  | 16 | 67705742  | 67711212  | 15 | 5470  | NA | NA | 13 | NA | 2  | NA |
| Breast-AdenoCa | 73936e8b-c893-4afd-bd1f-be90c06a4869  | 4  | 62914338  | 62914660  | 6  | 322   | 1  | 4  | 1  | NA | NA | NA |
| Breast-AdenoCa | 73936e8b-c893-4afd-bd1f-be90c06a4869  | 9  | 14772098  | 14772245  | 6  | 147   | 3  | 1  | 2  | NA | NA | NA |
| Breast-AdenoCa | 73936e8b-c893-4afd-bd1f-be90c06a4869  | 11 | 77715378  | 77716416  | 8  | 1038  | 3  | 2  | 2  | NA | NA | 1  |
| Liver-HCC      | 73afad06-c623-11e3-bf01-24c6515278c0  | 8  | 40369068  | 40371399  | 6  | 2331  | NA | 4  | 2  | NA | NA | NA |
| Breast-AdenoCa | 74039acd-5aca-4c65-818c-3b577d295be0  | 1  | 150447953 | 150448459 | 8  | 506   | 1  | NA | 7  | NA | NA | NA |
| Breast-AdenoCa | 74039acd-5aca-4c65-818c-3b577d295be0  | 8  | 39317806  | 39318466  | 8  | 660   | 1  | 4  | 2  | 1  | NA | NA |
| Breast-AdenoCa | 74039acd-5aca-4c65-818c-3b577d295be0  | 8  | 50227012  | 50228503  | 7  | 1491  | 3  | 2  | 1  | NA | NA | 1  |
| Breast-AdenoCa | 74039acd-5aca-4c65-818c-3b577d295be0  | 8  | 95240644  | 95247538  | 11 | 6894  | 4  | 2  | 5  | NA | NA | NA |
| Breast-AdenoCa | 74039acd-5aca-4c65-818c-3b577d295be0  | 8  | 97804963  | 97808444  | 7  | 3481  | 2  | 3  | 2  | NA | NA | NA |
| Breast-AdenoCa | 74039acd-5aca-4c65-818c-3b577d295be0  | 8  | 115662075 | 115667854 | 8  | 5779  | 1  | 1  | 6  | NA | NA | NA |
| Breast-AdenoCa | 74039acd-5aca-4c65-818c-3b577d295be0  | 8  | 117804178 | 117810393 | 10 | 6215  | 4  | 3  | 3  | NA | NA | NA |
| Breast-AdenoCa | 74039acd-5aca-4c65-818c-3b577d295be0  | 9  | 103029001 | 103029596 | 6  | 595   | 1  | 3  | 2  | NA | NA | NA |
| Breast-AdenoCa | 74039acd-5aca-4c65-818c-3b577d295be0  | 21 | 18035131  | 18038471  | 11 | 3340  | 5  | 4  | 2  | NA | NA | NA |
| Breast-AdenoCa | 74039acd-5aca-4c65-818c-3b577d295be0  | 21 | 21962443  | 21977717  | 21 | 15274 | NA | 6  | 14 | NA | 1  | NA |
| Panc-AdenoCA   | 7410c00d-ed0b-48dc-a4bf-eb76ac613980  | 3  | 152247349 | 152248067 | 17 | 718   | 2  | 7  | 8  | NA | NA | NA |
| Panc-AdenoCA   | 7410c00d-ed0b-48dc-a4bf-eb76ac613980  | 4  | 5872421   | 5880394   | 9  | 7973  | NA | NA | NA | 3  | 5  | 1  |
| Panc-AdenoCA   | 7410c00d-ed0b-48dc-a4bf-eb76ac613980  | 5  | 97409527  | 97411813  | 6  | 2286  | NA | NA | NA | 1  | 5  | NA |
| Panc-AdenoCA   | 7410c00d-ed0b-48dc-a4bf-eb76ac613980  | 5  | 162960153 | 162965879 | 18 | 5726  | NA | NA | NA | 9  | 4  | 5  |
| Panc-AdenoCA   | 7410c00d-ed0b-48dc-a4bf-eb76ac613980  | 6  | 33689693  | 33694687  | 6  | 4994  | NA | 1  | 4  | NA | NA | 1  |
| Panc-AdenoCA   | 7410c00d-ed0b-48dc-a4bf-eb76ac613980  | 7  | 40263192  | 40271541  | 11 | 8349  | NA | NA | NA | 4  | 5  | 2  |
| Panc-AdenoCA   | 7410c00d-ed0b-48dc-a4bf-eb76ac613980  | 7  | 145498573 | 145508893 | 15 | 10320 | 2  | NA | NA | 2  | 4  | 7  |
| Panc-AdenoCA   | 7410c00d-ed0b-48dc-a4bf-eb76ac613980  | 7  | 145571785 | 145577450 | 11 | 5665  | NA | NA | NA | 5  | 2  | 4  |
| Panc-AdenoCA   | 7410c00d-ed0b-48dc-a4bf-eb76ac613980  | 8  | 91986989  | 91991537  | 8  | 4548  | NA | NA | NA | 1  | 7  | NA |
| Panc-AdenoCA   | 7410c00d-ed0b-48dc-a4bf-eb76ac613980  | 8  | 143928268 | 143929181 | 7  | 913   | 2  | 5  | NA | NA | NA | NA |
| Panc-AdenoCA   | 7410c00d-ed0b-48dc-a4bf-eb76ac613980  | 9  | 16378513  | 16393231  | 31 | 14718 | NA | NA | NA | 8  | 18 | 5  |
| Panc-AdenoCA   | 7410c00d-ed0b-48dc-a4bf-eb76ac613980  | 11 | 124849639 | 124851088 | 6  | 1449  | NA | NA | NA | 2  | 3  | 1  |
| Panc-AdenoCA   | 7410c00d-ed0b-48dc-a4bf-eb76ac613980  | 14 | 79729206  | 79735159  | 14 | 5953  | NA | NA | NA | 1  | 4  | 9  |
| Panc-AdenoCA   | 7410c00d-ed0b-48dc-a4bf-eb76ac613980  | 15 | 82233247  | 82244604  | 23 | 11357 | 3  | 8  | 11 | NA | 1  | NA |
| Panc-AdenoCA   | 7410c00d-ed0b-48dc-a4bf-eb76ac613980  | 19 | 35656463  | 35657780  | 6  | 1317  | NA | 3  | 3  | NA | NA | NA |
| Panc-AdenoCA   | 7410c00d-ed0b-48dc-a4bf-eb76ac613980  | X  | 113648417 | 113654579 | 8  | 6162  | NA | NA | NA | 4  | 3  | 1  |
| Kidney-RCC     | 741c4656-0fd0-416e-86c8-f6533b6c96f4  | 2  | 40455081  | 40458650  | 6  | 3569  | NA | NA | 3  | 3  | NA | NA |
| Kidney-RCC     | 741c4656-0fd0-416e-86c8-f6533b6c96f4  | 9  | 29224032  | 29226607  | 8  | 2575  | 1  | NA | 3  | 2  | 1  | 1  |
| Breast-AdenoCa | 7456abd5-303e-4e6f-bf4e-47efefc7310f  | 12 | 66661736  | 66662167  | 6  | 431   | 2  | 3  | 1  | NA | NA | NA |
| Breast-AdenoCa | 7456abd5-303e-4e6f-bf4e-47efefc7310f  | 13 | 73585540  | 73588081  | 10 | 2541  | NA | 7  | 3  | NA | NA | NA |
| Breast-AdenoCa | 7456abd5-303e-4e6f-bf4e-47efefc7310f  | 13 | 89092098  | 89099615  | 9  | 7517  | 2  | 7  | NA | NA | NA | NA |
| Breast-AdenoCa | 7456abd5-303e-4e6f-bf4e-47efefc7310f  | 13 | 89209467  | 89211235  | 9  | 1768  | NA | 9  | NA | NA | NA | NA |
| Breast-AdenoCa | 7456abd5-303e-4e6f-bf4e-47efefc7310f  | 13 | 96152548  | 96156986  | 8  | 4438  | NA | 6  | 2  | NA | NA | NA |
| Breast-AdenoCa | 7456abd5-303e-4e6f-bf4e-47efefc7310f  | 13 | 113382413 | 113387144 | 7  | 4731  | NA | 7  | NA | NA | NA | NA |
| Ovary-AdenoCA  | 745b8756-0eab-423f-8cde-e0ff1aaa6596  | 12 | 33932450  | 33934053  | 6  | 1603  | NA | 2  | 4  | NA | NA | NA |
| Panc-AdenoCA   | 748d3ff3-8699-4519-8e0f-26b6a0581b1ff | 1  | 35080762  | 35080898  | 6  | 136   | NA | 2  | 4  | NA | NA | NA |

|                  |                                      |    |           |           |    |       |    |    |    |    |    |    |
|------------------|--------------------------------------|----|-----------|-----------|----|-------|----|----|----|----|----|----|
| Panc-AdenoCA     | 748d3ff3-8699-4519-8e0f-26b6a0581bff | 17 | 62333903  | 62337585  | 15 | 3682  | NA | 6  | 9  | NA | NA | NA |
| Panc-AdenoCA     | 748d3ff3-8699-4519-8e0f-26b6a0581bff | 17 | 68576426  | 68577768  | 8  | 1342  | 1  | 4  | 3  | NA | NA | NA |
| Breast-AdenoCa   | 74b57d2c-a83f-4798-b86b-a533975e4cc0 | 3  | 8386950   | 8388786   | 6  | 1836  | NA | 3  | 3  | NA | NA | NA |
| Breast-AdenoCa   | 74b57d2c-a83f-4798-b86b-a533975e4cc0 | 4  | 70685768  | 70690284  | 11 | 4516  | 2  | 7  | 2  | NA | NA | NA |
| Breast-AdenoCa   | 74b57d2c-a83f-4798-b86b-a533975e4cc0 | 6  | 92141025  | 92141279  | 7  | 254   | NA | 2  | 5  | NA | NA | NA |
| Breast-AdenoCa   | 74b57d2c-a83f-4798-b86b-a533975e4cc0 | 6  | 98166944  | 98178676  | 23 | 11732 | 7  | 15 | 1  | NA | NA | NA |
| Breast-AdenoCa   | 74b57d2c-a83f-4798-b86b-a533975e4cc0 | 8  | 139974771 | 139977072 | 6  | 2301  | 1  | 4  | 1  | NA | NA | NA |
| Breast-AdenoCa   | 74b57d2c-a83f-4798-b86b-a533975e4cc0 | 9  | 19667258  | 19667389  | 6  | 131   | NA | 5  | 1  | NA | NA | NA |
| Breast-AdenoCa   | 74b57d2c-a83f-4798-b86b-a533975e4cc0 | 10 | 12678417  | 12680251  | 13 | 1834  | 3  | 5  | 4  | NA | NA | 1  |
| Breast-AdenoCa   | 74b57d2c-a83f-4798-b86b-a533975e4cc0 | 11 | 62727558  | 62731426  | 7  | 3868  | 1  | 5  | 1  | NA | NA | NA |
| Breast-AdenoCa   | 74b57d2c-a83f-4798-b86b-a533975e4cc0 | 13 | 21959101  | 21959924  | 7  | 823   | NA | 4  | 3  | NA | NA | NA |
| Breast-AdenoCa   | 74b57d2c-a83f-4798-b86b-a533975e4cc0 | 17 | 25668825  | 25669528  | 10 | 703   | 2  | 1  | 7  | NA | NA | NA |
| Breast-AdenoCa   | 74b57d2c-a83f-4798-b86b-a533975e4cc0 | 19 | 11886024  | 11890738  | 6  | 4714  | NA | 4  | 2  | NA | NA | NA |
| Breast-AdenoCa   | 74b57d2c-a83f-4798-b86b-a533975e4cc0 | 20 | 50917102  | 50920612  | 6  | 3510  | NA | 1  | 5  | NA | NA | NA |
| Skin-Melanoma    | 74e5905f-6350-498a-9454-9ea0593d2f56 | 7  | 8412047   | 8414683   | 8  | 2636  | NA | 2  | 6  | NA | NA | NA |
| Skin-Melanoma    | 74e5905f-6350-498a-9454-9ea0593d2f56 | 8  | 29999866  | 30000492  | 8  | 626   | NA | 4  | 4  | NA | NA | NA |
| Skin-Melanoma    | 74e5905f-6350-498a-9454-9ea0593d2f56 | 8  | 52850264  | 52856530  | 25 | 6266  | 2  | 16 | 7  | NA | NA | NA |
| Skin-Melanoma    | 74e5905f-6350-498a-9454-9ea0593d2f56 | 8  | 54317893  | 54320206  | 8  | 2313  | 2  | NA | 5  | NA | 1  | NA |
| Skin-Melanoma    | 74e5905f-6350-498a-9454-9ea0593d2f56 | 8  | 56561377  | 56564030  | 7  | 2653  | NA | 2  | 5  | NA | NA | NA |
| Skin-Melanoma    | 74e5905f-6350-498a-9454-9ea0593d2f56 | 8  | 58281830  | 58287719  | 16 | 5889  | 4  | 6  | 6  | NA | NA | NA |
| Skin-Melanoma    | 74e5905f-6350-498a-9454-9ea0593d2f56 | 8  | 71529901  | 71538004  | 12 | 8103  | 2  | 3  | 7  | NA | NA | NA |
| Skin-Melanoma    | 74e5905f-6350-498a-9454-9ea0593d2f56 | 8  | 72894902  | 72898123  | 15 | 3221  | 1  | 7  | 6  | 1  | NA | NA |
| Skin-Melanoma    | 74e5905f-6350-498a-9454-9ea0593d2f56 | 9  | 15752760  | 15753178  | 7  | 418   | 1  | 1  | 5  | NA | NA | NA |
| Skin-Melanoma    | 74e5905f-6350-498a-9454-9ea0593d2f56 | 9  | 17242655  | 17243643  | 7  | 988   | 2  | 4  | 1  | NA | NA | NA |
| Skin-Melanoma    | 74e5905f-6350-498a-9454-9ea0593d2f56 | 9  | 17692620  | 17696551  | 23 | 3931  | 6  | 9  | 8  | NA | NA | NA |
| Skin-Melanoma    | 74e5905f-6350-498a-9454-9ea0593d2f56 | 9  | 24419687  | 24421908  | 10 | 2221  | 1  | 3  | 6  | NA | NA | NA |
| Skin-Melanoma    | 74e5905f-6350-498a-9454-9ea0593d2f56 | 9  | 30246363  | 30248345  | 8  | 1982  | 1  | 3  | 4  | NA | NA | NA |
| Skin-Melanoma    | 74e5905f-6350-498a-9454-9ea0593d2f56 | 9  | 36003378  | 36007156  | 20 | 3778  | 3  | 7  | 10 | NA | NA | NA |
| Skin-Melanoma    | 74e5905f-6350-498a-9454-9ea0593d2f56 | 12 | 2866372   | 2867060   | 9  | 688   | NA | 8  | 1  | NA | NA | NA |
| Skin-Melanoma    | 74e5905f-6350-498a-9454-9ea0593d2f56 | 12 | 6134211   | 6135561   | 9  | 1350  | 2  | NA | 7  | NA | NA | NA |
| Skin-Melanoma    | 74e5905f-6350-498a-9454-9ea0593d2f56 | 16 | 27199361  | 27204924  | 16 | 5563  | 1  | 3  | 10 | 1  | NA | 1  |
| Skin-Melanoma    | 74e5905f-6350-498a-9454-9ea0593d2f56 | 22 | 28919423  | 28921120  | 6  | 1697  | NA | 1  | 5  | NA | NA | NA |
| Skin-Melanoma    | 74e5905f-6350-498a-9454-9ea0593d2f56 | 22 | 40987135  | 40994569  | 13 | 7434  | 1  | 4  | 8  | NA | NA | NA |
| Skin-Melanoma    | 74e5905f-6350-498a-9454-9ea0593d2f56 | 22 | 44701385  | 44705424  | 7  | 4039  | NA | 2  | 5  | NA | NA | NA |
| Skin-Melanoma    | 74e5905f-6350-498a-9454-9ea0593d2f56 | X  | 154984172 | 154996113 | 28 | 11941 | 5  | 18 | 4  | 1  | NA | NA |
| Biliary-AdenoCA  | 7512b38c-c623-11e3-bf01-24c6515278c0 | 1  | 207083779 | 207084646 | 8  | 867   | NA | 4  | 4  | NA | NA | NA |
| Biliary-AdenoCA  | 7512b38c-c623-11e3-bf01-24c6515278c0 | 14 | 49435506  | 49436408  | 18 | 902   | 3  | 7  | 8  | NA | NA | NA |
| Biliary-AdenoCA  | 7512b38c-c623-11e3-bf01-24c6515278c0 | 14 | 49704411  | 49706149  | 14 | 1738  | 4  | 6  | 4  | NA | NA | NA |
| Biliary-AdenoCA  | 7512b38c-c623-11e3-bf01-24c6515278c0 | 17 | 15221176  | 15222886  | 6  | 1710  | 1  | 4  | 1  | NA | NA | NA |
| ColoRect-AdenoCA | 75ad15b9-8f9c-40c1-9ca6-1e8454fbd310 | 10 | 54411096  | 54411446  | 6  | 350   | 1  | 2  | 3  | NA | NA | NA |
| ColoRect-AdenoCA | 75ad15b9-8f9c-40c1-9ca6-1e8454fbd310 | 10 | 82362811  | 82362979  | 8  | 168   | 3  | 1  | 4  | NA | NA | NA |
| Panc-AdenoCA     | 75cd90ef-e884-4812-bbf3-5a524d95147e | 5  | 63622838  | 63623326  | 6  | 488   | NA | NA | 6  | NA | NA | NA |
| Panc-AdenoCA     | 75cd90ef-e884-4812-bbf3-5a524d95147e | 8  | 120705315 | 120708332 | 7  | 3017  | 1  | 3  | 3  | NA | NA | NA |
| Panc-AdenoCA     | 75fac59c-3346-4c5a-bb9f-fb67fec8d13b | 1  | 73255680  | 73257130  | 6  | 1450  | NA | NA | NA | 3  | 3  | NA |
| Panc-AdenoCA     | 75fac59c-3346-4c5a-bb9f-fb67fec8d13b | 1  | 107260850 | 107264056 | 7  | 3206  | NA | NA | NA | 3  | 3  | 1  |
| Panc-AdenoCA     | 75fac59c-3346-4c5a-bb9f-fb67fec8d13b | 15 | 95840206  | 95848982  | 16 | 8776  | NA | 4  | 11 | NA | NA | 1  |
| Panc-AdenoCA     | 75fac59c-3346-4c5a-bb9f-fb67fec8d13b | 20 | 24108822  | 24111472  | 13 | 2650  | NA | NA | 13 | NA | NA | NA |
| Head-SCC         | 7625877a-7a2b-466f-944b-9e56689ad47b | 8  | 31792734  | 31796875  | 36 | 4141  | 5  | 15 | 16 | NA | NA | NA |
| Lymph-BNHL       | 76788f17-257d-47c7-ad85-ac5f959216b5 | 1  | 244997704 | 244997936 | 6  | 232   | NA | NA | NA | 4  | 1  | 1  |
| Lymph-BNHL       | 76788f17-257d-47c7-ad85-ac5f959216b5 | 8  | 128748769 | 128749250 | 7  | 481   | NA | 2  | 2  | 2  | NA | 1  |
| Lymph-BNHL       | 76788f17-257d-47c7-ad85-ac5f959216b5 | 10 | 83199806  | 83200204  | 6  | 398   | NA | NA | 1  | 2  | NA | 3  |
| Lymph-BNHL       | 76788f17-257d-47c7-ad85-ac5f959216b5 | 14 | 106325262 | 106329998 | 43 | 4736  | 1  | 12 | 15 | 8  | 3  | 4  |
| Lymph-BNHL       | 76788f17-257d-47c7-ad85-ac5f959216b5 | 14 | 106829757 | 106830599 | 9  | 842   | NA | 1  | 4  | 2  | 1  | 1  |
| Lymph-BNHL       | 76788f17-257d-47c7-ad85-ac5f959216b5 | 22 | 22385525  | 22385843  | 18 | 318   | 4  | 2  | 4  | 4  | 1  | 3  |
| Lymph-BNHL       | 76788f17-257d-47c7-ad85-ac5f959216b5 | 22 | 22759152  | 22764560  | 9  | 5408  | 2  | 2  | 4  | 1  | NA | NA |
| Lymph-BNHL       | 76788f17-257d-47c7-ad85-ac5f959216b5 | 22 | 23235973  | 23247562  | 31 | 11589 | 4  | 6  | 12 | 4  | 1  | 4  |
| Lung-SCC         | 7731ef7f-25bd-42f5-9a20-be249306a711 | 1  | 84954548  | 84956337  | 7  | 1789  | NA | 5  | 2  | NA | NA | NA |
| Lung-SCC         | 7731ef7f-25bd-42f5-9a20-be249306a711 | 1  | 160732164 | 160735319 | 7  | 3155  | NA | 2  | 5  | NA | NA | NA |
| Lung-SCC         | 7731ef7f-25bd-42f5-9a20-be249306a711 | 2  | 231758457 | 231760762 | 6  | 2305  | 1  | 3  | 2  | NA | NA | NA |
| Lung-SCC         | 7731ef7f-25bd-42f5-9a20-be249306a711 | 3  | 11818145  | 11820596  | 6  | 2451  | NA | 4  | 2  | NA | NA | NA |

|                  |                                      |    |           |           |    |       |    |    |    |    |    |    |
|------------------|--------------------------------------|----|-----------|-----------|----|-------|----|----|----|----|----|----|
| Lung-SCC         | 7731ef7f-25bd-42f5-9a20-be249306a711 | 3  | 172337345 | 172340133 | 8  | 2788  | NA | 6  | 2  | NA | NA | NA |
| Lung-SCC         | 7731ef7f-25bd-42f5-9a20-be249306a711 | 5  | 43007591  | 43010680  | 6  | 3089  | NA | 1  | 5  | NA | NA | NA |
| Lung-SCC         | 7731ef7f-25bd-42f5-9a20-be249306a711 | 6  | 37659491  | 37662122  | 6  | 2631  | 1  | 2  | 3  | NA | NA | NA |
| Lung-SCC         | 7731ef7f-25bd-42f5-9a20-be249306a711 | 6  | 89539161  | 89543868  | 9  | 4707  | NA | 4  | 5  | NA | NA | NA |
| Lung-SCC         | 7731ef7f-25bd-42f5-9a20-be249306a711 | 8  | 1416751   | 1418805   | 7  | 2054  | 1  | 3  | 3  | NA | NA | NA |
| Lung-SCC         | 7731ef7f-25bd-42f5-9a20-be249306a711 | 9  | 34149182  | 34152068  | 8  | 2886  | NA | 4  | 3  | 1  | NA | NA |
| Lung-SCC         | 7731ef7f-25bd-42f5-9a20-be249306a711 | 10 | 63721194  | 63727840  | 10 | 6646  | 3  | 2  | 4  | NA | NA | 1  |
| Lung-SCC         | 7731ef7f-25bd-42f5-9a20-be249306a711 | 10 | 89533772  | 89536902  | 9  | 3130  | NA | 6  | 3  | NA | NA | NA |
| Lung-SCC         | 7731ef7f-25bd-42f5-9a20-be249306a711 | 11 | 47480895  | 47483196  | 7  | 2301  | NA | 2  | 5  | NA | NA | NA |
| Lung-SCC         | 7731ef7f-25bd-42f5-9a20-be249306a711 | 11 | 112038634 | 112042538 | 11 | 3904  | 1  | 2  | 8  | NA | NA | NA |
| Lung-SCC         | 7731ef7f-25bd-42f5-9a20-be249306a711 | 12 | 54674799  | 54677812  | 6  | 3013  | NA | 3  | 3  | NA | NA | NA |
| Lung-SCC         | 7731ef7f-25bd-42f5-9a20-be249306a711 | 14 | 36156040  | 36158739  | 12 | 2699  | 6  | 2  | 3  | NA | NA | 1  |
| Lung-SCC         | 7731ef7f-25bd-42f5-9a20-be249306a711 | 14 | 36227677  | 36233656  | 11 | 5979  | NA | 5  | 6  | NA | NA | NA |
| Lung-SCC         | 7731ef7f-25bd-42f5-9a20-be249306a711 | 14 | 64262671  | 64267267  | 8  | 4596  | NA | 4  | 4  | NA | NA | NA |
| Lung-SCC         | 7731ef7f-25bd-42f5-9a20-be249306a711 | 15 | 63822647  | 63826107  | 7  | 3460  | 3  | 4  | NA | NA | NA | NA |
| Lung-SCC         | 7731ef7f-25bd-42f5-9a20-be249306a711 | 16 | 503570    | 504179    | 6  | 609   | 2  | NA | 4  | NA | NA | NA |
| Lung-SCC         | 7731ef7f-25bd-42f5-9a20-be249306a711 | 16 | 11270582  | 11274315  | 8  | 3733  | NA | 4  | 4  | NA | NA | NA |
| Lung-SCC         | 7731ef7f-25bd-42f5-9a20-be249306a711 | 17 | 28015817  | 28017875  | 7  | 2058  | 1  | 3  | 3  | NA | NA | NA |
| Lung-SCC         | 7731ef7f-25bd-42f5-9a20-be249306a711 | 19 | 11612641  | 11620617  | 12 | 7976  | 6  | 3  | 2  | NA | NA | 1  |
| Lung-SCC         | 7731ef7f-25bd-42f5-9a20-be249306a711 | 19 | 14497335  | 14515222  | 21 | 17887 | 1  | 9  | 11 | NA | NA | NA |
| Lung-SCC         | 7731ef7f-25bd-42f5-9a20-be249306a711 | 20 | 23039103  | 23041934  | 6  | 2831  | NA | 2  | 4  | NA | NA | NA |
| Lung-SCC         | 7731ef7f-25bd-42f5-9a20-be249306a711 | 22 | 19559142  | 19563905  | 7  | 4763  | 1  | 6  | NA | NA | NA | NA |
| Biliary-AdenoCA  | 7789ef18-c623-11e3-bf01-24c6515278c0 | 1  | 195781190 | 195781745 | 6  | 555   | NA | 1  | 5  | NA | NA | NA |
| Biliary-AdenoCA  | 7789ef18-c623-11e3-bf01-24c6515278c0 | 10 | 14788388  | 14792387  | 6  | 3999  | 2  | 2  | 2  | NA | NA | NA |
| Liver-HCC        | 77bf9514-88da-473b-9a91-f669ef3cd343 | 6  | 35615547  | 35616115  | 7  | 568   | NA | NA | NA | 4  | 2  | 1  |
| Eso-AdenoCa      | 77c022d3-2f29-49d3-a1df-cc2e9407fd7f | 7  | 56489111  | 56492857  | 16 | 3746  | 4  | 12 | NA | NA | NA | NA |
| Eso-AdenoCa      | 77c022d3-2f29-49d3-a1df-cc2e9407fd7f | 13 | 115003616 | 115005353 | 8  | 1737  | 2  | 3  | 3  | NA | NA | NA |
| Eso-AdenoCa      | 77c022d3-2f29-49d3-a1df-cc2e9407fd7f | 18 | 21463625  | 21464215  | 7  | 590   | 3  | 3  | 1  | NA | NA | NA |
| Panc-AdenoCA     | 78100212-65aa-4365-8b64-4b33f77732d5 | 1  | 242938606 | 242942060 | 12 | 3454  | 1  | NA | NA | 2  | 6  | 3  |
| Panc-AdenoCA     | 78100212-65aa-4365-8b64-4b33f77732d5 | 2  | 221600683 | 221607449 | 8  | 6766  | NA | NA | NA | 2  | 5  | 1  |
| Panc-AdenoCA     | 78100212-65aa-4365-8b64-4b33f77732d5 | 3  | 117879725 | 117883481 | 12 | 3756  | 1  | NA | NA | 1  | 5  | 5  |
| Panc-AdenoCA     | 78100212-65aa-4365-8b64-4b33f77732d5 | 4  | 34255039  | 34256993  | 6  | 1954  | NA | NA | NA | 3  | 2  | 1  |
| Panc-AdenoCA     | 78100212-65aa-4365-8b64-4b33f77732d5 | 8  | 3775973   | 3780052   | 6  | 4079  | NA | NA | NA | 1  | 2  | 3  |
| Panc-AdenoCA     | 78100212-65aa-4365-8b64-4b33f77732d5 | 8  | 41418342  | 41419871  | 9  | 1529  | NA | 5  | 4  | NA | NA | NA |
| Panc-AdenoCA     | 78100212-65aa-4365-8b64-4b33f77732d5 | 11 | 89015697  | 89021518  | 8  | 5821  | 1  | NA | NA | NA | 5  | 2  |
| Panc-AdenoCA     | 78100212-65aa-4365-8b64-4b33f77732d5 | 11 | 89038327  | 89041898  | 8  | 3571  | 1  | NA | NA | 1  | 1  | 5  |
| Panc-AdenoCA     | 78100212-65aa-4365-8b64-4b33f77732d5 | 12 | 33795837  | 33798716  | 14 | 2879  | NA | 1  | NA | 1  | 10 | 2  |
| Panc-AdenoCA     | 78100212-65aa-4365-8b64-4b33f77732d5 | 12 | 34523965  | 34524764  | 8  | 799   | 1  | 1  | 6  | NA | NA | NA |
| Panc-AdenoCA     | 78100212-65aa-4365-8b64-4b33f77732d5 | 13 | 86656938  | 86661325  | 6  | 4387  | NA | NA | NA | 1  | 5  | NA |
| Panc-AdenoCA     | 78100212-65aa-4365-8b64-4b33f77732d5 | X  | 26406148  | 26410629  | 6  | 4481  | NA | NA | 2  | NA | NA | 4  |
| Panc-AdenoCA     | 78100212-65aa-4365-8b64-4b33f77732d5 | X  | 122844898 | 122847705 | 7  | 2807  | 1  | NA | NA | NA | 2  | 4  |
| Prost-AdenoCA    | 783579bd-e29d-457c-8236-1a80b557600c | 1  | 193571996 | 193577913 | 18 | 5917  | 1  | 16 | 1  | NA | NA | NA |
| Prost-AdenoCA    | 783579bd-e29d-457c-8236-1a80b557600c | 1  | 216137993 | 216140299 | 15 | 2306  | 1  | 8  | 6  | NA | NA | NA |
| Prost-AdenoCA    | 783579bd-e29d-457c-8236-1a80b557600c | 4  | 162797802 | 162800850 | 13 | 3048  | NA | 9  | 4  | NA | NA | NA |
| Prost-AdenoCA    | 783579bd-e29d-457c-8236-1a80b557600c | 4  | 168730821 | 168733390 | 9  | 2569  | NA | 5  | 4  | NA | NA | NA |
| Eso-AdenoCa      | 7866dfb2-46b3-42b4-905b-12f80593d6bd | 3  | 117667495 | 117668248 | 6  | 753   | 1  | 3  | 2  | NA | NA | NA |
| Eso-AdenoCa      | 7866dfb2-46b3-42b4-905b-12f80593d6bd | 3  | 157310701 | 157314119 | 9  | 3418  | 3  | 2  | 4  | NA | NA | NA |
| Eso-AdenoCa      | 7866dfb2-46b3-42b4-905b-12f80593d6bd | 3  | 194164273 | 194166075 | 9  | 1802  | 3  | 3  | 3  | NA | NA | NA |
| Eso-AdenoCa      | 7866dfb2-46b3-42b4-905b-12f80593d6bd | 4  | 32108432  | 32109856  | 6  | 1424  | 1  | 2  | 3  | NA | NA | NA |
| Eso-AdenoCa      | 7866dfb2-46b3-42b4-905b-12f80593d6bd | 4  | 93510944  | 93513834  | 7  | 2890  | NA | 2  | 5  | NA | NA | NA |
| Eso-AdenoCa      | 7866dfb2-46b3-42b4-905b-12f80593d6bd | 7  | 54401455  | 54416503  | 18 | 15048 | 1  | 4  | 12 | NA | 1  | NA |
| Eso-AdenoCa      | 7866dfb2-46b3-42b4-905b-12f80593d6bd | 7  | 86555425  | 86560695  | 9  | 5270  | NA | 2  | 7  | NA | NA | NA |
| Eso-AdenoCa      | 7866dfb2-46b3-42b4-905b-12f80593d6bd | 8  | 78008345  | 78012827  | 6  | 4482  | 2  | 2  | 2  | NA | NA | NA |
| Eso-AdenoCa      | 7866dfb2-46b3-42b4-905b-12f80593d6bd | 8  | 130629026 | 130630373 | 7  | 1347  | 2  | 4  | 1  | NA | NA | NA |
| Eso-AdenoCa      | 7866dfb2-46b3-42b4-905b-12f80593d6bd | 11 | 17235950  | 17236775  | 7  | 825   | 6  | 1  | NA | NA | NA | NA |
| Eso-AdenoCa      | 7866dfb2-46b3-42b4-905b-12f80593d6bd | 14 | 33956683  | 33961631  | 10 | 4948  | 1  | NA | 9  | NA | NA | NA |
| Eso-AdenoCa      | 7866dfb2-46b3-42b4-905b-12f80593d6bd | 14 | 38780545  | 38790438  | 16 | 9893  | 7  | 4  | 5  | NA | NA | NA |
| Eso-AdenoCa      | 7866dfb2-46b3-42b4-905b-12f80593d6bd | 14 | 49141541  | 49146827  | 8  | 5286  | 2  | 2  | 3  | NA | NA | 1  |
| Eso-AdenoCa      | 7866dfb2-46b3-42b4-905b-12f80593d6bd | 14 | 59780368  | 59791977  | 18 | 11609 | 2  | 2  | 12 | NA | NA | 2  |
| ColoRect-AdenoCA | 786fc3e4-e2bf-4914-9251-41c800ebb2fa | 10 | 573771    | 580513    | 10 | 6742  | 1  | 2  | 4  | 1  | 2  | NA |

|                  |                                       |    |           |           |    |       |    |    |    |    |    |    |
|------------------|---------------------------------------|----|-----------|-----------|----|-------|----|----|----|----|----|----|
| ColoRect-AdenoCA | 786fc3e4-e2bf-4914-9251-41c800ebb2fa  | 10 | 585580    | 587180    | 8  | 1600  | 1  | 2  | 1  | 1  | 3  | NA |
| ColoRect-AdenoCA | 786fc3e4-e2bf-4914-9251-41c800ebb2fa  | 10 | 615243    | 617531    | 11 | 2288  | 3  | 2  | 2  | 2  | 1  | 1  |
| ColoRect-AdenoCA | 786fc3e4-e2bf-4914-9251-41c800ebb2fa  | 10 | 647199    | 652743    | 9  | 5544  | 1  | 2  | 2  | 1  | 1  | 2  |
| ColoRect-AdenoCA | 786fc3e4-e2bf-4914-9251-41c800ebb2fa  | 10 | 663227    | 668146    | 9  | 4919  | 2  | 1  | 4  | 1  | NA | 1  |
| Lymph-BNHL       | 78bd2aa8-e5f6-4b4b-96f0-d406fbdcbce8  | 2  | 89157454  | 89165170  | 27 | 7716  | NA | 3  | 14 | 8  | 1  | 1  |
| Lymph-BNHL       | 78bd2aa8-e5f6-4b4b-96f0-d406fbdcbce8  | 3  | 120127380 | 120132551 | 12 | 5171  | NA | 6  | 6  | NA | NA | NA |
| Lymph-BNHL       | 78bd2aa8-e5f6-4b4b-96f0-d406fbdcbce8  | 8  | 128749174 | 128753183 | 11 | 4009  | 2  | 1  | 8  | NA | NA | NA |
| Lymph-BNHL       | 78bd2aa8-e5f6-4b4b-96f0-d406fbdcbce8  | 14 | 106173255 | 106178655 | 11 | 5400  | 1  | 1  | 9  | NA | NA | NA |
| Lymph-BNHL       | 78bd2aa8-e5f6-4b4b-96f0-d406fbdcbce8  | 14 | 106320634 | 106330618 | 23 | 9984  | 2  | 3  | 17 | 1  | NA | NA |
| Lymph-BNHL       | 78bd2aa8-e5f6-4b4b-96f0-d406fbdcbce8  | 22 | 23230477  | 23235602  | 9  | 5125  | NA | NA | 9  | NA | NA | NA |
| Panc-Endocrine   | 79353875-9d86-4063-a8ea-1d998acb1e81  | 12 | 65337864  | 65341354  | 12 | 3490  | NA | 5  | 6  | NA | 1  | NA |
| Biliary-AdenoCA  | 796a8782-6d7e-47c8-b322-fcfe1dd240c8  | 4  | 114075852 | 114079935 | 6  | 4083  | 2  | NA | 4  | NA | NA | NA |
| Biliary-AdenoCA  | 796a8782-6d7e-47c8-b322-fcfe1dd240c8  | 10 | 44353402  | 44354661  | 10 | 1259  | 3  | 1  | 6  | NA | NA | NA |
| Biliary-AdenoCA  | 796a8782-6d7e-47c8-b322-fcfe1dd240c8  | 10 | 64094671  | 64095569  | 9  | 898   | 5  | 1  | 3  | NA | NA | NA |
| Biliary-AdenoCA  | 796a8782-6d7e-47c8-b322-fcfe1dd240c8  | 20 | 55923710  | 55924796  | 11 | 1086  | 6  | 4  | 1  | NA | NA | NA |
| Biliary-AdenoCA  | 796a8782-6d7e-47c8-b322-fcfe1dd240c8  | X  | 8414342   | 8419860   | 18 | 5518  | 6  | 8  | 3  | NA | NA | 1  |
| Panc-AdenoCA     | 7981bbf3-dceb-4d89-900c-555967e97921  | 22 | 28371318  | 28371479  | 8  | 161   | NA | 1  | 6  | NA | NA | 1  |
| Eso-AdenoCa      | 7a4f6014-f7a2-459b-bc43-df164e73cbbba | 18 | 45498907  | 45498992  | 6  | 85    | NA | 2  | 4  | NA | NA | NA |
| Eso-AdenoCa      | 7a4f6014-f7a2-459b-bc43-df164e73cbbba | 20 | 23201491  | 23202129  | 9  | 638   | 1  | 3  | 5  | NA | NA | NA |
| Eso-AdenoCa      | 7a4f6014-f7a2-459b-bc43-df164e73cbbba | 20 | 23214481  | 23215847  | 7  | 1366  | NA | 2  | NA | 2  | 2  | 1  |
| Bone-Leiomyo     | 7a5d3b6b-be5a-4e55-9255-32a069b8af3d  | 4  | 56700117  | 56701516  | 6  | 1399  | 1  | 1  | 3  | NA | NA | 1  |
| Bone-Leiomyo     | 7a5d3b6b-be5a-4e55-9255-32a069b8af3d  | 9  | 1318690   | 1319745   | 20 | 1055  | 2  | 7  | 11 | NA | NA | NA |
| Bone-Leiomyo     | 7a5d3b6b-be5a-4e55-9255-32a069b8af3d  | 9  | 2244970   | 2251619   | 13 | 6649  | 1  | 2  | 10 | NA | NA | NA |
| Bone-Leiomyo     | 7a5d3b6b-be5a-4e55-9255-32a069b8af3d  | 9  | 2780524   | 2783648   | 12 | 3124  | 2  | 1  | 9  | NA | NA | NA |
| Bone-Leiomyo     | 7a5d3b6b-be5a-4e55-9255-32a069b8af3d  | 9  | 11342531  | 11349964  | 18 | 7433  | NA | NA | 17 | NA | 1  | NA |
| Bone-Leiomyo     | 7a5d3b6b-be5a-4e55-9255-32a069b8af3d  | 9  | 21788095  | 21788730  | 7  | 635   | NA | 3  | 4  | NA | NA | NA |
| Bone-Leiomyo     | 7a5d3b6b-be5a-4e55-9255-32a069b8af3d  | 9  | 21943700  | 21952749  | 25 | 9049  | 1  | 4  | 18 | NA | 2  | NA |
| Bone-Leiomyo     | 7a5d3b6b-be5a-4e55-9255-32a069b8af3d  | 16 | 48010034  | 48014651  | 7  | 4617  | NA | NA | 7  | NA | NA | NA |
| Liver-HCC        | 7a6bc147-a576-446d-a605-fa846ea3d1ad  | 3  | 56035400  | 56035877  | 9  | 477   | NA | 8  | 1  | NA | NA | NA |
| Eso-AdenoCa      | 7adcea71-1aed-450c-b0ff-b9d9820c6153  | 4  | 41386855  | 41389113  | 22 | 2258  | 2  | 7  | 13 | NA | NA | NA |
| Eso-AdenoCa      | 7adcea71-1aed-450c-b0ff-b9d9820c6153  | 5  | 86641698  | 86643372  | 8  | 1674  | NA | 6  | 2  | NA | NA | NA |
| Cervix-SCC       | 7bc3209f-b349-49bf-9b3d-44ef870b586f  | 10 | 69730187  | 69734930  | 9  | 4743  | 2  | 3  | 4  | NA | NA | NA |
| Liver-HCC        | 7c405ca0-c622-11e3-bf01-24c6515278c0  | 4  | 99197909  | 99200051  | 8  | 2142  | 1  | 7  | NA | NA | NA | NA |
| Panc-AdenoCA     | 7c43c006-d917-4915-b304-65995b6c0d46  | 2  | 33260618  | 33262215  | 9  | 1597  | NA | NA | 9  | NA | NA | NA |
| Panc-AdenoCA     | 7c43c006-d917-4915-b304-65995b6c0d46  | 2  | 33834601  | 33835002  | 9  | 401   | 1  | 5  | 3  | NA | NA | NA |
| Panc-AdenoCA     | 7c43c006-d917-4915-b304-65995b6c0d46  | 18 | 18921055  | 18923355  | 9  | 2300  | 1  | 1  | 7  | NA | NA | NA |
| Panc-AdenoCA     | 7c43c006-d917-4915-b304-65995b6c0d46  | 18 | 20576935  | 20578049  | 11 | 1114  | 2  | 1  | 8  | NA | NA | NA |
| Panc-AdenoCA     | 7c43c006-d917-4915-b304-65995b6c0d46  | 18 | 71466536  | 71476590  | 15 | 10054 | 1  | 6  | 8  | NA | NA | NA |
| Liver-HCC        | 7cd7fe38-c623-11e3-bf01-24c6515278c0  | 15 | 54347861  | 54348218  | 7  | 357   | NA | 2  | 5  | NA | NA | NA |
| Breast-LobularCa | 7cdbe0e8-f614-4f54-b864-fd6b39e8ef1c  | 2  | 25710894  | 25721039  | 13 | 10145 | 2  | 7  | 4  | NA | NA | NA |
| Breast-LobularCa | 7cdbe0e8-f614-4f54-b864-fd6b39e8ef1c  | 2  | 195390542 | 195395202 | 9  | 4660  | 3  | 6  | NA | NA | NA | NA |
| Breast-LobularCa | 7cdbe0e8-f614-4f54-b864-fd6b39e8ef1c  | 3  | 48132488  | 48141748  | 19 | 9260  | 2  | 9  | 8  | NA | NA | NA |
| Breast-LobularCa | 7cdbe0e8-f614-4f54-b864-fd6b39e8ef1c  | 3  | 49262634  | 49267796  | 7  | 5162  | 3  | 2  | 2  | NA | NA | NA |
| Breast-LobularCa | 7cdbe0e8-f614-4f54-b864-fd6b39e8ef1c  | 3  | 49269664  | 49275980  | 11 | 6316  | 3  | 2  | 5  | NA | NA | 1  |
| Breast-LobularCa | 7cdbe0e8-f614-4f54-b864-fd6b39e8ef1c  | 5  | 66255870  | 66260093  | 9  | 4223  | NA | 7  | 2  | NA | NA | NA |
| Breast-LobularCa | 7cdbe0e8-f614-4f54-b864-fd6b39e8ef1c  | 7  | 107566375 | 107572308 | 9  | 5933  | NA | 3  | 5  | NA | 1  | NA |
| Breast-LobularCa | 7cdbe0e8-f614-4f54-b864-fd6b39e8ef1c  | 8  | 87394042  | 87396426  | 6  | 2384  | 1  | 2  | 3  | NA | NA | NA |
| Breast-LobularCa | 7cdbe0e8-f614-4f54-b864-fd6b39e8ef1c  | 9  | 108082802 | 108087047 | 8  | 4245  | 1  | 2  | 5  | NA | NA | NA |
| Breast-LobularCa | 7cdbe0e8-f614-4f54-b864-fd6b39e8ef1c  | 10 | 128998424 | 129003242 | 9  | 4818  | 2  | 3  | 4  | NA | NA | NA |
| Breast-LobularCa | 7cdbe0e8-f614-4f54-b864-fd6b39e8ef1c  | 11 | 11386068  | 11392426  | 8  | 6358  | NA | 2  | 5  | NA | NA | 1  |
| Breast-LobularCa | 7cdbe0e8-f614-4f54-b864-fd6b39e8ef1c  | 11 | 119149658 | 119160891 | 17 | 11233 | 3  | 9  | 5  | NA | NA | NA |
| Breast-LobularCa | 7cdbe0e8-f614-4f54-b864-fd6b39e8ef1c  | 12 | 48281911  | 48285381  | 6  | 3470  | NA | 3  | 3  | NA | NA | NA |
| Breast-LobularCa | 7cdbe0e8-f614-4f54-b864-fd6b39e8ef1c  | 13 | 20575244  | 20579672  | 11 | 4428  | NA | 6  | 5  | NA | NA | NA |
| Breast-LobularCa | 7cdbe0e8-f614-4f54-b864-fd6b39e8ef1c  | 13 | 49306025  | 49306428  | 9  | 403   | NA | NA | 9  | NA | NA | NA |
| Breast-LobularCa | 7cdbe0e8-f614-4f54-b864-fd6b39e8ef1c  | 19 | 56095042  | 56109162  | 19 | 14120 | 3  | 6  | 9  | NA | 1  | NA |
| Breast-LobularCa | 7cdbe0e8-f614-4f54-b864-fd6b39e8ef1c  | 20 | 4331573   | 4334890   | 6  | 3317  | 1  | NA | 4  | NA | NA | 1  |
| Panc-AdenoCA     | 7d04f401-3505-410c-8def-0348ecd8aae2  | 7  | 4590968   | 4591770   | 6  | 802   | 1  | 1  | 3  | NA | 1  | NA |
| Panc-AdenoCA     | 7d04f401-3505-410c-8def-0348ecd8aae2  | 17 | 20962886  | 20963695  | 11 | 809   | NA | 4  | 7  | NA | NA | NA |
| Panc-AdenoCA     | 7d04f401-3505-410c-8def-0348ecd8aae2  | 18 | 22621824  | 22622864  | 8  | 1040  | 1  | 4  | 3  | NA | NA | NA |
| Panc-AdenoCA     | 7d04f401-3505-410c-8def-0348ecd8aae2  | X  | 81331773  | 81333438  | 13 | 1665  | 4  | 3  | 6  | NA | NA | NA |

|              |                                      |    |           |           |    |       |    |    |    |    |    |    |
|--------------|--------------------------------------|----|-----------|-----------|----|-------|----|----|----|----|----|----|
| Panc-AdenoCA | 7d04f401-3505-410c-8def-0348ecd8aae2 | X  | 94105822  | 94112324  | 11 | 6502  | NA | 4  | 6  | 1  | NA | NA |
| Bladder-TCC  | 7d2a22eb-7344-4cba-ad7d-94c3f9ef3d7c | 1  | 26657114  | 26662929  | 9  | 5815  | NA | 4  | 5  | NA | NA | NA |
| Bladder-TCC  | 7d2a22eb-7344-4cba-ad7d-94c3f9ef3d7c | 1  | 225846934 | 225853268 | 13 | 6334  | 1  | 7  | 5  | NA | NA | NA |
| Bladder-TCC  | 7d2a22eb-7344-4cba-ad7d-94c3f9ef3d7c | 2  | 106082651 | 106084692 | 7  | 2041  | NA | 6  | 1  | NA | NA | NA |
| Bladder-TCC  | 7d2a22eb-7344-4cba-ad7d-94c3f9ef3d7c | 2  | 110436585 | 110439087 | 8  | 2502  | NA | 4  | 4  | NA | NA | NA |
| Bladder-TCC  | 7d2a22eb-7344-4cba-ad7d-94c3f9ef3d7c | 7  | 21549760  | 21551684  | 12 | 1924  | 3  | 5  | 4  | NA | NA | NA |
| Bladder-TCC  | 7d2a22eb-7344-4cba-ad7d-94c3f9ef3d7c | 7  | 30385675  | 30386885  | 7  | 1210  | NA | 4  | 3  | NA | NA | NA |
| Bladder-TCC  | 7d2a22eb-7344-4cba-ad7d-94c3f9ef3d7c | 7  | 99968925  | 99971663  | 12 | 2738  | 1  | 3  | 8  | NA | NA | NA |
| Bladder-TCC  | 7d2a22eb-7344-4cba-ad7d-94c3f9ef3d7c | 8  | 25171959  | 25172763  | 8  | 804   | 1  | 2  | 5  | NA | NA | NA |
| Bladder-TCC  | 7d2a22eb-7344-4cba-ad7d-94c3f9ef3d7c | 11 | 57591762  | 57592950  | 7  | 1188  | 1  | 4  | 2  | NA | NA | NA |
| Bladder-TCC  | 7d2a22eb-7344-4cba-ad7d-94c3f9ef3d7c | 14 | 24626922  | 24629201  | 6  | 2279  | NA | 3  | 3  | NA | NA | NA |
| Bladder-TCC  | 7d2a22eb-7344-4cba-ad7d-94c3f9ef3d7c | 15 | 51901431  | 51902607  | 6  | 1176  | 1  | 2  | 3  | NA | NA | NA |
| Bladder-TCC  | 7d2a22eb-7344-4cba-ad7d-94c3f9ef3d7c | 15 | 65972698  | 65977833  | 15 | 5135  | NA | 5  | 10 | NA | NA | NA |
| Bladder-TCC  | 7d2a22eb-7344-4cba-ad7d-94c3f9ef3d7c | 19 | 16532171  | 16537968  | 18 | 5797  | 1  | 4  | 13 | NA | NA | NA |
| Bladder-TCC  | 7d2a22eb-7344-4cba-ad7d-94c3f9ef3d7c | Y  | 15361985  | 15376905  | 32 | 14920 | 2  | 11 | 19 | NA | NA | NA |
| Eso-AdenoCa  | 7d2da7ba-f57c-4083-9572-6fa98008083b | 2  | 10772468  | 10773423  | 10 | 955   | 1  | 5  | 4  | NA | NA | NA |
| Eso-AdenoCa  | 7d2da7ba-f57c-4083-9572-6fa98008083b | 2  | 11640661  | 11644111  | 15 | 3450  | NA | 4  | 10 | NA | 1  | NA |
| Eso-AdenoCa  | 7d2da7ba-f57c-4083-9572-6fa98008083b | 2  | 16638648  | 16645007  | 11 | 6359  | NA | 5  | 5  | NA | 1  | NA |
| Eso-AdenoCa  | 7d2da7ba-f57c-4083-9572-6fa98008083b | 2  | 107357963 | 107362115 | 12 | 4152  | 1  | 9  | 2  | NA | NA | NA |
| Eso-AdenoCa  | 7d2da7ba-f57c-4083-9572-6fa98008083b | 7  | 46804518  | 46805398  | 6  | 880   | NA | 1  | 2  | 1  | 2  | NA |
| Eso-AdenoCa  | 7d2da7ba-f57c-4083-9572-6fa98008083b | 7  | 53979194  | 53979445  | 7  | 251   | NA | 3  | 4  | NA | NA | NA |
| Eso-AdenoCa  | 7d2da7ba-f57c-4083-9572-6fa98008083b | 9  | 78740140  | 78743114  | 10 | 2974  | 1  | 3  | 6  | NA | NA | NA |
| Eso-AdenoCa  | 7d2da7ba-f57c-4083-9572-6fa98008083b | 11 | 132868460 | 132875898 | 14 | 7438  | 1  | NA | 13 | NA | NA | NA |
| Eso-AdenoCa  | 7d2da7ba-f57c-4083-9572-6fa98008083b | 13 | 107382917 | 107385880 | 16 | 2963  | NA | 7  | 9  | NA | NA | NA |
| Eso-AdenoCa  | 7d2da7ba-f57c-4083-9572-6fa98008083b | 16 | 47615954  | 47618736  | 10 | 2782  | 5  | 1  | 4  | NA | NA | NA |
| Eso-AdenoCa  | 7d2da7ba-f57c-4083-9572-6fa98008083b | 18 | 20156961  | 20159454  | 6  | 2493  | 2  | 1  | 3  | NA | NA | NA |
| Bone-Leiomyo | 7d332cb1-ba25-47e4-8bf8-d25e14f40d59 | 1  | 146803001 | 146806208 | 10 | 3207  | NA | 3  | 7  | NA | NA | NA |
| Bone-Leiomyo | 7d332cb1-ba25-47e4-8bf8-d25e14f40d59 | 1  | 168432732 | 168441477 | 15 | 8745  | 3  | 1  | 11 | NA | NA | NA |
| Bone-Leiomyo | 7d332cb1-ba25-47e4-8bf8-d25e14f40d59 | 1  | 171537273 | 171538653 | 14 | 1380  | 1  | 5  | 8  | NA | NA | NA |
| Bone-Leiomyo | 7d332cb1-ba25-47e4-8bf8-d25e14f40d59 | 1  | 171707881 | 171708653 | 7  | 772   | 2  | 5  | NA | NA | NA | NA |
| Bone-Leiomyo | 7d332cb1-ba25-47e4-8bf8-d25e14f40d59 | 1  | 174670392 | 174672627 | 11 | 2235  | 3  | 4  | 3  | NA | 1  | NA |
| Bone-Leiomyo | 7d332cb1-ba25-47e4-8bf8-d25e14f40d59 | 1  | 179956503 | 179961245 | 9  | 4742  | 1  | 4  | 4  | NA | NA | NA |
| Bone-Leiomyo | 7d332cb1-ba25-47e4-8bf8-d25e14f40d59 | 1  | 185710490 | 185714333 | 8  | 3843  | 1  | 5  | 2  | NA | NA | NA |
| Bone-Leiomyo | 7d332cb1-ba25-47e4-8bf8-d25e14f40d59 | 1  | 225121930 | 225123389 | 10 | 1459  | 1  | 5  | 4  | NA | NA | NA |
| Bone-Leiomyo | 7d332cb1-ba25-47e4-8bf8-d25e14f40d59 | 1  | 225915531 | 225916320 | 18 | 789   | NA | NA | 18 | NA | NA | NA |
| Bone-Leiomyo | 7d332cb1-ba25-47e4-8bf8-d25e14f40d59 | 2  | 155719434 | 155720609 | 13 | 1175  | NA | 4  | 9  | NA | NA | NA |
| Bone-Leiomyo | 7d332cb1-ba25-47e4-8bf8-d25e14f40d59 | 3  | 63714150  | 63714836  | 6  | 686   | NA | 4  | 2  | NA | NA | NA |
| Bone-Leiomyo | 7d332cb1-ba25-47e4-8bf8-d25e14f40d59 | 4  | 7187212   | 7187850   | 8  | 638   | 1  | 5  | 2  | NA | NA | NA |
| Bone-Leiomyo | 7d332cb1-ba25-47e4-8bf8-d25e14f40d59 | 5  | 19273647  | 19274799  | 15 | 1152  | 1  | 5  | 7  | NA | NA | 2  |
| Bone-Leiomyo | 7d332cb1-ba25-47e4-8bf8-d25e14f40d59 | 5  | 30940398  | 30943852  | 8  | 3454  | 1  | 3  | 4  | NA | NA | NA |
| Bone-Leiomyo | 7d332cb1-ba25-47e4-8bf8-d25e14f40d59 | 5  | 170771233 | 170773771 | 10 | 2538  | NA | 8  | 2  | NA | NA | NA |
| Bone-Leiomyo | 7d332cb1-ba25-47e4-8bf8-d25e14f40d59 | 5  | 171966801 | 171969401 | 8  | 2600  | NA | 1  | 7  | NA | NA | NA |
| Bone-Leiomyo | 7d332cb1-ba25-47e4-8bf8-d25e14f40d59 | 5  | 173458781 | 173463880 | 15 | 5099  | 1  | 8  | 6  | NA | NA | NA |
| Bone-Leiomyo | 7d332cb1-ba25-47e4-8bf8-d25e14f40d59 | 6  | 47479070  | 47481477  | 6  | 2407  | NA | 2  | 4  | NA | NA | NA |
| Bone-Leiomyo | 7d332cb1-ba25-47e4-8bf8-d25e14f40d59 | 6  | 50536586  | 50539102  | 17 | 2516  | NA | NA | 17 | NA | NA | NA |
| Bone-Leiomyo | 7d332cb1-ba25-47e4-8bf8-d25e14f40d59 | 6  | 91706741  | 91711401  | 10 | 4660  | 1  | 8  | 1  | NA | NA | NA |
| Bone-Leiomyo | 7d332cb1-ba25-47e4-8bf8-d25e14f40d59 | 7  | 12054821  | 12057685  | 8  | 2864  | 1  | 4  | 3  | NA | NA | NA |
| Bone-Leiomyo | 7d332cb1-ba25-47e4-8bf8-d25e14f40d59 | 7  | 26757880  | 26763758  | 7  | 5878  | NA | 5  | 2  | NA | NA | NA |
| Bone-Leiomyo | 7d332cb1-ba25-47e4-8bf8-d25e14f40d59 | 7  | 28214598  | 28216905  | 12 | 2307  | NA | 1  | 11 | NA | NA | NA |
| Bone-Leiomyo | 7d332cb1-ba25-47e4-8bf8-d25e14f40d59 | 7  | 28471952  | 28477661  | 14 | 5709  | 1  | 1  | 12 | NA | NA | NA |
| Bone-Leiomyo | 7d332cb1-ba25-47e4-8bf8-d25e14f40d59 | 7  | 81675936  | 81676617  | 24 | 681   | NA | NA | 24 | NA | NA | NA |
| Bone-Leiomyo | 7d332cb1-ba25-47e4-8bf8-d25e14f40d59 | 7  | 83382267  | 83385509  | 11 | 3242  | 1  | 5  | 4  | NA | NA | 1  |
| Bone-Leiomyo | 7d332cb1-ba25-47e4-8bf8-d25e14f40d59 | 7  | 87510775  | 87521198  | 18 | 10423 | 1  | 13 | 4  | NA | NA | NA |
| Bone-Leiomyo | 7d332cb1-ba25-47e4-8bf8-d25e14f40d59 | 7  | 89999167  | 90001026  | 8  | 1859  | 3  | 3  | 2  | NA | NA | NA |
| Bone-Leiomyo | 7d332cb1-ba25-47e4-8bf8-d25e14f40d59 | 7  | 119965627 | 119967180 | 7  | 1553  | NA | 3  | 4  | NA | NA | NA |
| Bone-Leiomyo | 7d332cb1-ba25-47e4-8bf8-d25e14f40d59 | 9  | 87513012  | 87517519  | 14 | 4507  | 1  | 8  | 5  | NA | NA | NA |
| Bone-Leiomyo | 7d332cb1-ba25-47e4-8bf8-d25e14f40d59 | 10 | 8565988   | 8566814   | 6  | 826   | NA | NA | 6  | NA | NA | NA |
| Bone-Leiomyo | 7d332cb1-ba25-47e4-8bf8-d25e14f40d59 | 10 | 11482136  | 11484723  | 8  | 2587  | 1  | 4  | 3  | NA | NA | NA |
| Bone-Leiomyo | 7d332cb1-ba25-47e4-8bf8-d25e14f40d59 | 11 | 13174174  | 13174870  | 9  | 696   | NA | NA | 9  | NA | NA | NA |
| Bone-Leiomyo | 7d332cb1-ba25-47e4-8bf8-d25e14f40d59 | 11 | 74741880  | 74742687  | 8  | 807   | NA | NA | 8  | NA | NA | NA |

|                  |                                      |   |    |           |           |    |       |    |    |    |    |    |    |
|------------------|--------------------------------------|---|----|-----------|-----------|----|-------|----|----|----|----|----|----|
| Bone-Leiomyo     | 7d332cb1-ba25-47e4-8bf8-d25e14f40d59 |   | 12 | 63898015  | 63901054  | 6  | 3039  | NA | 4  | 2  | NA | NA | NA |
| Bone-Leiomyo     | 7d332cb1-ba25-47e4-8bf8-d25e14f40d59 |   | 12 | 64956976  | 64958276  | 7  | 1300  | NA | NA | 7  | NA | NA | NA |
| Bone-Leiomyo     | 7d332cb1-ba25-47e4-8bf8-d25e14f40d59 |   | 12 | 65128092  | 65158724  | 35 | 30632 | NA | NA | 34 | 1  | NA | NA |
| Bone-Leiomyo     | 7d332cb1-ba25-47e4-8bf8-d25e14f40d59 |   | 12 | 69403470  | 69404560  | 15 | 1090  | 1  | 3  | 10 | NA | 1  | NA |
| Bone-Leiomyo     | 7d332cb1-ba25-47e4-8bf8-d25e14f40d59 |   | 12 | 70330170  | 70331121  | 10 | 951   | 2  | 7  | 1  | NA | NA | NA |
| Bone-Leiomyo     | 7d332cb1-ba25-47e4-8bf8-d25e14f40d59 |   | 12 | 70551147  | 70554134  | 11 | 2987  | NA | NA | 11 | NA | NA | NA |
| Bone-Leiomyo     | 7d332cb1-ba25-47e4-8bf8-d25e14f40d59 |   | 12 | 71712205  | 71718456  | 8  | 6251  | 1  | 3  | 4  | NA | NA | NA |
| Bone-Leiomyo     | 7d332cb1-ba25-47e4-8bf8-d25e14f40d59 |   | 12 | 77989403  | 77992574  | 11 | 3171  | 2  | 5  | 4  | NA | NA | NA |
| Bone-Leiomyo     | 7d332cb1-ba25-47e4-8bf8-d25e14f40d59 |   | 12 | 81068145  | 81068776  | 9  | 631   | NA | 1  | 8  | NA | NA | NA |
| Bone-Leiomyo     | 7d332cb1-ba25-47e4-8bf8-d25e14f40d59 |   | 12 | 83153829  | 83160814  | 10 | 6985  | NA | 6  | 4  | NA | NA | NA |
| Bone-Leiomyo     | 7d332cb1-ba25-47e4-8bf8-d25e14f40d59 |   | 12 | 83513501  | 83515657  | 9  | 2156  | 1  | 3  | 5  | NA | NA | NA |
| Bone-Leiomyo     | 7d332cb1-ba25-47e4-8bf8-d25e14f40d59 |   | 12 | 85289837  | 85312116  | 27 | 22279 | NA | 1  | 26 | NA | NA | NA |
| Bone-Leiomyo     | 7d332cb1-ba25-47e4-8bf8-d25e14f40d59 |   | 12 | 85504739  | 85506126  | 7  | 1387  | NA | 5  | 2  | NA | NA | NA |
| Bone-Leiomyo     | 7d332cb1-ba25-47e4-8bf8-d25e14f40d59 |   | 17 | 77143897  | 77146689  | 24 | 2792  | NA | NA | 24 | NA | NA | NA |
| Bone-Leiomyo     | 7d332cb1-ba25-47e4-8bf8-d25e14f40d59 |   | 17 | 77206503  | 77209509  | 22 | 3006  | NA | NA | 22 | NA | NA | NA |
| Bone-Leiomyo     | 7d332cb1-ba25-47e4-8bf8-d25e14f40d59 |   | 17 | 77376575  | 77378426  | 16 | 1851  | NA | 1  | 15 | NA | NA | NA |
| Bone-Leiomyo     | 7d332cb1-ba25-47e4-8bf8-d25e14f40d59 |   | 19 | 41205719  | 41211114  | 7  | 5395  | 1  | 4  | 1  | NA | 1  | NA |
| Bone-Leiomyo     | 7d332cb1-ba25-47e4-8bf8-d25e14f40d59 | X |    | 2685245   | 2687298   | 7  | 2053  | 1  | 5  | 1  | NA | NA | NA |
| Bone-Leiomyo     | 7d332cb1-ba25-47e4-8bf8-d25e14f40d59 | X |    | 149784689 | 149785291 | 11 | 602   | NA | NA | 11 | NA | NA | NA |
| ColoRect-AdenoCA | 7d59205a-65ec-4341-9748-28639d82ed29 |   | 3  | 84136399  | 84138004  | 7  | 1605  | 1  | 3  | 3  | NA | NA | NA |
| Prost-AdenoCA    | 7d6fb1a7-7742-4b8c-9903-abff706240b5 |   | 2  | 151232954 | 151234017 | 8  | 1063  | 2  | 4  | 2  | NA | NA | NA |
| Prost-AdenoCA    | 7d6fb1a7-7742-4b8c-9903-abff706240b5 |   | 2  | 152171310 | 152174009 | 13 | 2699  | 3  | 4  | 6  | NA | NA | NA |
| Prost-AdenoCA    | 7d6fb1a7-7742-4b8c-9903-abff706240b5 |   | 13 | 20993820  | 20995637  | 15 | 1817  | 2  | 5  | 8  | NA | NA | NA |
| Prost-AdenoCA    | 7d6fb1a7-7742-4b8c-9903-abff706240b5 |   | 13 | 21347875  | 21351183  | 12 | 3308  | 1  | 5  | 6  | NA | NA | NA |
| Prost-AdenoCA    | 7d6fb1a7-7742-4b8c-9903-abff706240b5 |   | 13 | 103364954 | 103366196 | 14 | 1242  | NA | 7  | 7  | NA | NA | NA |
| Prost-AdenoCA    | 7d6fb1a7-7742-4b8c-9903-abff706240b5 |   | 13 | 103404532 | 103407690 | 12 | 3158  | NA | 6  | 6  | NA | NA | NA |
| Prost-AdenoCA    | 7d6fb1a7-7742-4b8c-9903-abff706240b5 |   | 19 | 22900446  | 22904614  | 8  | 4168  | NA | 3  | 5  | NA | NA | NA |
| Prost-AdenoCA    | 7d6fb1a7-7742-4b8c-9903-abff706240b5 |   | 19 | 57077929  | 57078575  | 8  | 646   | 1  | 1  | 6  | NA | NA | NA |
| Cervix-SCC       | 7dc3e035-c7ae-4164-a62b-9c2460812b05 |   | 6  | 28951564  | 28953755  | 7  | 2191  | NA | 3  | 4  | NA | NA | NA |
| Cervix-SCC       | 7dc3e035-c7ae-4164-a62b-9c2460812b05 |   | 11 | 68471439  | 68472687  | 11 | 1248  | 1  | 3  | 7  | NA | NA | NA |
| Cervix-SCC       | 7dc3e035-c7ae-4164-a62b-9c2460812b05 |   | 12 | 56635002  | 56637832  | 6  | 2830  | NA | 2  | 4  | NA | NA | NA |
| Cervix-SCC       | 7dc3e035-c7ae-4164-a62b-9c2460812b05 |   | 20 | 34346101  | 34349850  | 6  | 3749  | 2  | 2  | 2  | NA | NA | NA |
| Prost-AdenoCA    | 7dd2dc62-0eb4-4d45-86f1-e9e9377181ca |   | 2  | 78758356  | 78759122  | 7  | 766   | NA | NA | NA | 4  | 3  | NA |
| Prost-AdenoCA    | 7dd2dc62-0eb4-4d45-86f1-e9e9377181ca |   | 5  | 110839422 | 110843644 | 6  | 4222  | NA | NA | NA | 2  | 4  | NA |
| Prost-AdenoCA    | 7dd2dc62-0eb4-4d45-86f1-e9e9377181ca |   | 10 | 52816323  | 52817840  | 6  | 1517  | 1  | 5  | NA | NA | NA | NA |
| Prost-AdenoCA    | 7dd2dc62-0eb4-4d45-86f1-e9e9377181ca |   | 13 | 90335220  | 90337043  | 7  | 1823  | NA | 7  | NA | NA | NA | NA |
| Stomach-AdenoCA  | 7e036d40-b669-4929-a1e2-c4736e01a473 |   | 12 | 125346542 | 125347811 | 7  | 1269  | 2  | 2  | 3  | NA | NA | NA |
| Prost-AdenoCA    | 7e10e325-16d2-42df-b957-df4d3a9477d0 |   | 13 | 21347299  | 21348118  | 6  | 819   | NA | 2  | 4  | NA | NA | NA |
| Prost-AdenoCA    | 7e10e325-16d2-42df-b957-df4d3a9477d0 |   | 13 | 103364954 | 103366196 | 14 | 1242  | NA | 7  | 7  | NA | NA | NA |
| Prost-AdenoCA    | 7e10e325-16d2-42df-b957-df4d3a9477d0 |   | 13 | 103404532 | 103407690 | 10 | 3158  | NA | 6  | 4  | NA | NA | NA |
| Prost-AdenoCA    | 7e10e325-16d2-42df-b957-df4d3a9477d0 |   | 19 | 22900446  | 22904614  | 7  | 4168  | NA | 2  | 5  | NA | NA | NA |
| Head-SCC         | 7e584ff6-0b81-4f85-81da-b8117afee326 |   | 6  | 10843608  | 10844732  | 7  | 1124  | NA | NA | NA | 6  | 1  | NA |
| Head-SCC         | 7e584ff6-0b81-4f85-81da-b8117afee326 |   | 10 | 38113676  | 38114056  | 6  | 380   | 2  | 4  | NA | NA | NA | NA |
| Head-SCC         | 7e584ff6-0b81-4f85-81da-b8117afee326 |   | 11 | 78554777  | 78556495  | 17 | 1718  | 1  | 4  | 12 | NA | NA | NA |
| Head-SCC         | 7e584ff6-0b81-4f85-81da-b8117afee326 |   | 11 | 88256460  | 88260888  | 10 | 4428  | 3  | 1  | 6  | NA | NA | NA |
| Head-SCC         | 7e584ff6-0b81-4f85-81da-b8117afee326 |   | 11 | 88484840  | 88485356  | 11 | 516   | 1  | 3  | 7  | NA | NA | NA |
| Liver-HCC        | 7eac4710-c622-11e3-bf01-24c6515278c0 |   | 7  | 124345868 | 124346795 | 8  | 927   | 1  | 4  | 3  | NA | NA | NA |
| Liver-HCC        | 7eac4710-c622-11e3-bf01-24c6515278c0 |   | 8  | 128503844 | 128504679 | 11 | 835   | NA | 6  | 5  | NA | NA | NA |
| Stomach-AdenoCA  | 7eb0f792-858f-45d1-a908-125b02ea1506 |   | 2  | 4938982   | 4945969   | 9  | 6987  | NA | NA | NA | 3  | 1  | 5  |
| Stomach-AdenoCA  | 7eb0f792-858f-45d1-a908-125b02ea1506 |   | 2  | 6432855   | 6436281   | 8  | 3426  | NA | NA | NA | 4  | 3  | 1  |
| Stomach-AdenoCA  | 7eb0f792-858f-45d1-a908-125b02ea1506 |   | 2  | 18507777  | 18508981  | 10 | 1204  | NA | NA | NA | 8  | 2  | NA |
| Stomach-AdenoCA  | 7eb0f792-858f-45d1-a908-125b02ea1506 |   | 2  | 80027979  | 80033074  | 8  | 5095  | NA | NA | NA | 5  | 1  | 2  |
| Stomach-AdenoCA  | 7eb0f792-858f-45d1-a908-125b02ea1506 |   | 4  | 32304715  | 32309415  | 9  | 4700  | NA | NA | NA | 8  | NA | 1  |
| Stomach-AdenoCA  | 7eb0f792-858f-45d1-a908-125b02ea1506 |   | 4  | 44479219  | 44482870  | 8  | 3651  | NA | NA | NA | 3  | 4  | 1  |
| Stomach-AdenoCA  | 7eb0f792-858f-45d1-a908-125b02ea1506 |   | 4  | 66181705  | 66188495  | 9  | 6790  | NA | NA | NA | 3  | 3  | 3  |
| Stomach-AdenoCA  | 7eb0f792-858f-45d1-a908-125b02ea1506 |   | 4  | 117702302 | 117708020 | 10 | 5718  | NA | NA | 1  | 7  | NA | 2  |
| Stomach-AdenoCA  | 7eb0f792-858f-45d1-a908-125b02ea1506 |   | 5  | 5201851   | 5205000   | 7  | 3149  | NA | NA | NA | 3  | 3  | 1  |
| Stomach-AdenoCA  | 7eb0f792-858f-45d1-a908-125b02ea1506 |   | 6  | 57343241  | 57345800  | 10 | 2559  | NA | NA | NA | 8  | NA | 2  |
| Stomach-AdenoCA  | 7eb0f792-858f-45d1-a908-125b02ea1506 |   | 7  | 119483078 | 119486505 | 7  | 3427  | NA | NA | NA | 2  | 4  | 1  |
| Stomach-AdenoCA  | 7eb0f792-858f-45d1-a908-125b02ea1506 |   | 9  | 121762167 | 121766037 | 9  | 3870  | 2  | NA | NA | 4  | 2  | 1  |



|                 |                                      |    |           |           |    |      |    |    |    |    |    |    |
|-----------------|--------------------------------------|----|-----------|-----------|----|------|----|----|----|----|----|----|
| Stomach-AdenoCA | 7eb0f792-858f-45d1-a908-125b02ea1506 | 10 | 37866256  | 37869442  | 6  | 3186 | NA | NA | NA | 3  | 3  | NA |
| Stomach-AdenoCA | 7eb0f792-858f-45d1-a908-125b02ea1506 | 13 | 65554684  | 65560013  | 7  | 5329 | NA | NA | NA | 3  | 2  | 2  |
| Skin-Melanoma   | 7edc42d3-d08e-4360-a3e1-aeb57cfc6640 | 2  | 193836913 | 193837292 | 6  | 379  | 2  | 2  | 2  | NA | NA | NA |
| Skin-Melanoma   | 7edc42d3-d08e-4360-a3e1-aeb57cfc6640 | 6  | 54920457  | 54920954  | 6  | 497  | 1  | 4  | 1  | NA | NA | NA |
| Skin-Melanoma   | 7edc42d3-d08e-4360-a3e1-aeb57cfc6640 | 6  | 63904548  | 63904865  | 7  | 317  | NA | 4  | 3  | NA | NA | NA |
| Skin-Melanoma   | 7edc42d3-d08e-4360-a3e1-aeb57cfc6640 | 10 | 73872130  | 73877316  | 10 | 5186 | 3  | 7  | NA | NA | NA | NA |
| Skin-Melanoma   | 7edc42d3-d08e-4360-a3e1-aeb57cfc6640 | 11 | 82657112  | 82660727  | 7  | 3615 | NA | 3  | 4  | NA | NA | NA |
| Panc-AdenoCA    | 7f42e118-aab6-438a-9e84-e7451fe12d7e | 3  | 563969    | 566065    | 8  | 2096 | NA | NA | NA | 3  | 2  | 3  |
| Panc-AdenoCA    | 7f42e118-aab6-438a-9e84-e7451fe12d7e | 3  | 191953874 | 191959161 | 7  | 5287 | NA | NA | NA | 4  | 2  | 1  |
| Panc-AdenoCA    | 7f42e118-aab6-438a-9e84-e7451fe12d7e | 4  | 13397228  | 13398310  | 6  | 1082 | NA | NA | NA | 3  | 3  | NA |
| Panc-AdenoCA    | 7f42e118-aab6-438a-9e84-e7451fe12d7e | 4  | 180384481 | 180391147 | 11 | 6666 | NA | NA | 1  | 4  | 4  | 2  |
| Panc-AdenoCA    | 7f42e118-aab6-438a-9e84-e7451fe12d7e | 4  | 181057843 | 181060512 | 7  | 2669 | NA | 3  | 3  | NA | NA | 1  |
| Panc-AdenoCA    | 7f42e118-aab6-438a-9e84-e7451fe12d7e | 4  | 189677587 | 189678602 | 9  | 1015 | NA | NA | NA | 1  | 6  | 2  |
| Panc-AdenoCA    | 7f42e118-aab6-438a-9e84-e7451fe12d7e | 8  | 97747137  | 97750665  | 6  | 3528 | NA | NA | NA | 3  | 2  | 1  |
| Panc-AdenoCA    | 7f42e118-aab6-438a-9e84-e7451fe12d7e | 10 | 9624695   | 9627789   | 6  | 3094 | 1  | 1  | 3  | NA | NA | 1  |
| Panc-AdenoCA    | 7f42e118-aab6-438a-9e84-e7451fe12d7e | 10 | 57465005  | 57466806  | 14 | 1801 | NA | NA | NA | 4  | 3  | 7  |
| Panc-AdenoCA    | 7f42e118-aab6-438a-9e84-e7451fe12d7e | 11 | 50280840  | 50284627  | 7  | 3787 | NA | NA | NA | 2  | NA | 5  |
| Panc-AdenoCA    | 7f42e118-aab6-438a-9e84-e7451fe12d7e | 13 | 69602193  | 69607961  | 11 | 5768 | NA | NA | NA | 3  | 5  | 3  |
| Panc-AdenoCA    | 7f42e118-aab6-438a-9e84-e7451fe12d7e | 18 | 21857204  | 21857524  | 6  | 320  | NA | 4  | 2  | NA | NA | NA |
| Liver-HCC       | 7f795952-c623-11e3-bf01-24c6515278c0 | 1  | 238677674 | 238681152 | 7  | 3478 | NA | 3  | 3  | 1  | NA | NA |
| Panc-AdenoCA    | 7fcd8af9-4d73-4c97-95cc-b30b09f21bb2 | 18 | 18794649  | 18794737  | 7  | 88   | 2  | NA | 5  | NA | NA | NA |
| Ovary-AdenoCA   | 7fdd07a4-4a27-40c3-af92-a0074e6391f5 | 5  | 468806    | 472722    | 8  | 3916 | 1  | 5  | 2  | NA | NA | NA |
| Ovary-AdenoCA   | 7fdd07a4-4a27-40c3-af92-a0074e6391f5 | 19 | 12634668  | 12639311  | 30 | 4643 | 2  | 15 | 12 | NA | NA | 1  |
| Cervix-SCC      | 801e67c8-c506-410a-bdf0-856a66e974f4 | 6  | 34711319  | 34714913  | 8  | 3594 | 1  | 2  | 5  | NA | NA | NA |
| Cervix-SCC      | 801e67c8-c506-410a-bdf0-856a66e974f4 | 8  | 145621491 | 145623107 | 6  | 1616 | 1  | 2  | 3  | NA | NA | NA |
| Cervix-SCC      | 801e67c8-c506-410a-bdf0-856a66e974f4 | 9  | 85623801  | 85627423  | 6  | 3622 | 1  | 2  | 3  | NA | NA | NA |
| Cervix-SCC      | 801e67c8-c506-410a-bdf0-856a66e974f4 | 11 | 67970260  | 67972325  | 7  | 2065 | NA | 2  | 5  | NA | NA | NA |
| Cervix-SCC      | 801e67c8-c506-410a-bdf0-856a66e974f4 | 12 | 55021973  | 55028395  | 10 | 6422 | 1  | 6  | 2  | NA | NA | 1  |
| Cervix-SCC      | 801e67c8-c506-410a-bdf0-856a66e974f4 | 13 | 102771382 | 102777779 | 8  | 6397 | NA | NA | 8  | NA | NA | NA |
| Cervix-SCC      | 801e67c8-c506-410a-bdf0-856a66e974f4 | 14 | 103819265 | 103822916 | 6  | 3651 | NA | 2  | 4  | NA | NA | NA |
| Cervix-SCC      | 801e67c8-c506-410a-bdf0-856a66e974f4 | 22 | 24503311  | 24507242  | 6  | 3931 | NA | 2  | 4  | NA | NA | NA |
| Bladder-TCC     | 804ffa2e-158b-447d-945c-707684134c87 | 7  | 141778613 | 141780215 | 9  | 1602 | NA | 1  | 8  | NA | NA | NA |
| Bladder-TCC     | 804ffa2e-158b-447d-945c-707684134c87 | 8  | 63209370  | 63214907  | 12 | 5537 | 1  | 1  | 10 | NA | NA | NA |
| Bladder-TCC     | 804ffa2e-158b-447d-945c-707684134c87 | 12 | 120182179 | 120190309 | 11 | 8130 | NA | 3  | 8  | NA | NA | NA |
| Bladder-TCC     | 804ffa2e-158b-447d-945c-707684134c87 | 15 | 39679807  | 39680616  | 6  | 809  | NA | 3  | 3  | NA | NA | NA |
| Bladder-TCC     | 804ffa2e-158b-447d-945c-707684134c87 | 16 | 4759550   | 4765524   | 7  | 5974 | NA | 4  | 3  | NA | NA | NA |
| Bladder-TCC     | 804ffa2e-158b-447d-945c-707684134c87 | 19 | 11319856  | 11321351  | 6  | 1495 | NA | 2  | 4  | NA | NA | NA |
| Bladder-TCC     | 804ffa2e-158b-447d-945c-707684134c87 | 20 | 20993677  | 20997278  | 14 | 3601 | 2  | 2  | 10 | NA | NA | NA |
| Ovary-AdenoCA   | 8093649a-74d6-4832-9154-8cc0182fa381 | 11 | 75049530  | 75050424  | 6  | 894  | 2  | 2  | 2  | NA | NA | NA |
| Ovary-AdenoCA   | 8093649a-74d6-4832-9154-8cc0182fa381 | 11 | 83781423  | 83782837  | 10 | 1414 | 3  | 4  | 3  | NA | NA | NA |
| Ovary-AdenoCA   | 8093649a-74d6-4832-9154-8cc0182fa381 | 11 | 84470514  | 84471323  | 7  | 809  | 3  | 2  | 2  | NA | NA | NA |
| Ovary-AdenoCA   | 8093649a-74d6-4832-9154-8cc0182fa381 | 11 | 97483082  | 97488741  | 7  | 5659 | 1  | NA | 6  | NA | NA | NA |
| Ovary-AdenoCA   | 8093649a-74d6-4832-9154-8cc0182fa381 | 11 | 100228042 | 100230589 | 7  | 2547 | 3  | 1  | 3  | NA | NA | NA |
| Ovary-AdenoCA   | 8093649a-74d6-4832-9154-8cc0182fa381 | 11 | 100264372 | 100270540 | 8  | 6168 | NA | 5  | 3  | NA | NA | NA |
| Ovary-AdenoCA   | 8093649a-74d6-4832-9154-8cc0182fa381 | 11 | 100690661 | 100697507 | 12 | 6846 | 2  | 3  | 7  | NA | NA | NA |
| Ovary-AdenoCA   | 8093649a-74d6-4832-9154-8cc0182fa381 | 11 | 103615129 | 103618462 | 11 | 3333 | 2  | 5  | 4  | NA | NA | NA |
| Ovary-AdenoCA   | 8093649a-74d6-4832-9154-8cc0182fa381 | 11 | 104087982 | 104094089 | 10 | 6107 | 2  | 2  | 6  | NA | NA | NA |
| Ovary-AdenoCA   | 8093649a-74d6-4832-9154-8cc0182fa381 | 11 | 104407299 | 104412966 | 7  | 5667 | 1  | 3  | 3  | NA | NA | NA |
| Ovary-AdenoCA   | 8093649a-74d6-4832-9154-8cc0182fa381 | 11 | 104429333 | 104433409 | 7  | 4076 | 1  | 2  | 4  | NA | NA | NA |
| Ovary-AdenoCA   | 8093649a-74d6-4832-9154-8cc0182fa381 | 11 | 115111691 | 115115924 | 10 | 4233 | 6  | 3  | 1  | NA | NA | NA |
| Ovary-AdenoCA   | 8093649a-74d6-4832-9154-8cc0182fa381 | 11 | 115882866 | 115891993 | 14 | 9127 | 6  | 6  | 2  | NA | NA | NA |
| Ovary-AdenoCA   | 8093649a-74d6-4832-9154-8cc0182fa381 | 11 | 120942034 | 120946341 | 7  | 4307 | 1  | 3  | 3  | NA | NA | NA |
| Ovary-AdenoCA   | 8093649a-74d6-4832-9154-8cc0182fa381 | 11 | 121547032 | 121551863 | 9  | 4831 | 5  | 3  | 1  | NA | NA | NA |
| Ovary-AdenoCA   | 8093649a-74d6-4832-9154-8cc0182fa381 | 11 | 123403172 | 123408306 | 7  | 5134 | 3  | 3  | 1  | NA | NA | NA |
| Ovary-AdenoCA   | 8093649a-74d6-4832-9154-8cc0182fa381 | 11 | 124316996 | 124322763 | 10 | 5767 | 1  | 3  | 5  | NA | NA | 1  |
| Ovary-AdenoCA   | 8093649a-74d6-4832-9154-8cc0182fa381 | 11 | 127041291 | 127046827 | 7  | 5536 | 4  | 2  | 1  | NA | NA | NA |
| Ovary-AdenoCA   | 8093649a-74d6-4832-9154-8cc0182fa381 | 11 | 128406178 | 128411205 | 7  | 5027 | NA | 5  | 2  | NA | NA | NA |
| Ovary-AdenoCA   | 8093649a-74d6-4832-9154-8cc0182fa381 | 11 | 131095849 | 131104915 | 11 | 9066 | NA | 6  | 5  | NA | NA | NA |
| Liver-HCC       | 80ebcecc-4a7a-40dd-914c-f0648a58095f | 8  | 40173831  | 40174378  | 7  | 547  | NA | 3  | 3  | NA | NA | 1  |
| Liver-HCC       | 80ebcecc-4a7a-40dd-914c-f0648a58095f | 19 | 19808731  | 19810348  | 8  | 1617 | NA | 3  | 5  | NA | NA | NA |

|                  |                                      |    |           |           |    |       |    |    |    |    |    |    |
|------------------|--------------------------------------|----|-----------|-----------|----|-------|----|----|----|----|----|----|
| Head-SCC         | 81598359-24d5-4a8b-a6e6-7a6f94289119 | 14 | 82137912  | 82138342  | 6  | 430   | NA | 2  | 4  | NA | NA | NA |
| Liver-HCC        | 819b4304-c622-11e3-bf01-24c6515278c0 | 8  | 4554147   | 4558315   | 6  | 4168  | NA | NA | NA | 2  | 2  | 2  |
| Liver-HCC        | 81a8b064-e735-455f-b2db-af7ae11daac4 | 7  | 114347482 | 114350548 | 12 | 3066  | NA | 7  | 5  | NA | NA | NA |
| ColoRect-AdenoCA | 81b1e78c-6032-4ff4-b52a-83456b9450ea | 6  | 73998030  | 73998971  | 6  | 941   | NA | 1  | 5  | NA | NA | NA |
| Lymph-BNHL       | 81b4dd02-34ec-4ddc-8818-ed888a60ad88 | 14 | 106238664 | 106241179 | 17 | 2515  | 1  | 5  | 10 | 1  | NA | NA |
| Lymph-BNHL       | 81b4dd02-34ec-4ddc-8818-ed888a60ad88 | 14 | 106324967 | 106329161 | 28 | 4194  | 1  | 9  | 5  | 8  | NA | 5  |
| Lymph-BNHL       | 81b4dd02-34ec-4ddc-8818-ed888a60ad88 | 18 | 60984862  | 60988194  | 14 | 3332  | 2  | 5  | 2  | 3  | 1  | 1  |
| Lymph-BNHL       | 81b4dd02-34ec-4ddc-8818-ed888a60ad88 | 22 | 22749427  | 22749615  | 6  | 188   | NA | 4  | 1  | NA | NA | 1  |
| Lymph-BNHL       | 81b4dd02-34ec-4ddc-8818-ed888a60ad88 | 22 | 23227765  | 23231798  | 13 | 4033  | 2  | 1  | 5  | 3  | 1  | 1  |
| Panc-AdenoCA     | 81bc7f0c-865d-4801-a935-2ab04170df53 | 5  | 22873863  | 22879583  | 14 | 5720  | 1  | 6  | 7  | NA | NA | NA |
| Panc-AdenoCA     | 81bc7f0c-865d-4801-a935-2ab04170df53 | 10 | 10811786  | 10811795  | 7  | 9     | NA | NA | NA | 4  | 1  | 2  |
| Lymph-BNHL       | 81cc0f39-6677-4f2e-9a75-d30152b188f3 | 2  | 142732152 | 142736850 | 6  | 4698  | NA | NA | NA | 2  | 2  | 2  |
| Lymph-BNHL       | 81cc0f39-6677-4f2e-9a75-d30152b188f3 | 3  | 187461042 | 187463289 | 13 | 2247  | NA | 1  | 7  | 4  | 1  | NA |
| Lymph-BNHL       | 81cc0f39-6677-4f2e-9a75-d30152b188f3 | 8  | 116337541 | 116345567 | 10 | 8026  | NA | NA | 1  | 1  | 4  | 4  |
| Lymph-BNHL       | 81cc0f39-6677-4f2e-9a75-d30152b188f3 | 10 | 58233924  | 58238432  | 6  | 4508  | NA | NA | 1  | 3  | 1  | 1  |
| Lymph-BNHL       | 81cc0f39-6677-4f2e-9a75-d30152b188f3 | 12 | 112973735 | 112974028 | 6  | 293   | NA | NA | 6  | NA | NA | NA |
| Lymph-BNHL       | 81cc0f39-6677-4f2e-9a75-d30152b188f3 | 12 | 122458906 | 122463307 | 11 | 4401  | 2  | 1  | 8  | NA | NA | NA |
| Lymph-BNHL       | 81cc0f39-6677-4f2e-9a75-d30152b188f3 | 14 | 106068739 | 106071254 | 17 | 2515  | 2  | 5  | 10 | NA | NA | NA |
| Lymph-BNHL       | 81cc0f39-6677-4f2e-9a75-d30152b188f3 | 14 | 106112651 | 106114367 | 18 | 1716  | 2  | 8  | 8  | NA | NA | NA |
| Lymph-BNHL       | 81cc0f39-6677-4f2e-9a75-d30152b188f3 | 14 | 106321993 | 106330138 | 58 | 8145  | 6  | 8  | 26 | 8  | 7  | 3  |
| Lymph-BNHL       | 81cc0f39-6677-4f2e-9a75-d30152b188f3 | 14 | 106725333 | 106726169 | 14 | 836   | 1  | NA | 3  | 4  | 3  | 3  |
| Lymph-BNHL       | 81cc0f39-6677-4f2e-9a75-d30152b188f3 | 15 | 86225855  | 86226112  | 8  | 257   | 1  | 4  | 2  | 1  | NA | NA |
| Lymph-BNHL       | 81cc0f39-6677-4f2e-9a75-d30152b188f3 | 16 | 10971672  | 10974173  | 14 | 2501  | NA | 4  | 10 | NA | NA | NA |
| Lymph-BNHL       | 81cc0f39-6677-4f2e-9a75-d30152b188f3 | 18 | 60804791  | 60809720  | 20 | 4929  | NA | 1  | 7  | 7  | 4  | 1  |
| Lymph-BNHL       | 81cc0f39-6677-4f2e-9a75-d30152b188f3 | 18 | 60873259  | 60875272  | 8  | 2013  | 2  | 1  | NA | 3  | 2  | NA |
| Lymph-BNHL       | 81cc0f39-6677-4f2e-9a75-d30152b188f3 | 18 | 60983837  | 60988772  | 76 | 4935  | 4  | 9  | 32 | 23 | 3  | 5  |
| Lymph-BNHL       | 81cc0f39-6677-4f2e-9a75-d30152b188f3 | 22 | 23028853  | 23055316  | 63 | 26463 | 3  | 9  | 31 | 12 | 4  | 4  |
| Lymph-BNHL       | 81cc0f39-6677-4f2e-9a75-d30152b188f3 | 22 | 23242054  | 23244238  | 9  | 2184  | NA | 6  | 1  | NA | 1  | 1  |
| Lymph-BNHL       | 81cc0f39-6677-4f2e-9a75-d30152b188f3 | 22 | 23278583  | 23283127  | 7  | 4544  | NA | 1  | 3  | 2  | 1  | NA |
| Panc-AdenoCA     | 8282283d-247a-431d-9421-0fcc52f0a897 | 3  | 37430664  | 37431180  | 10 | 516   | 1  | 8  | 1  | NA | NA | NA |
| Panc-AdenoCA     | 8282283d-247a-431d-9421-0fcc52f0a897 | 10 | 46074675  | 46076859  | 6  | 2184  | 1  | 4  | 1  | NA | NA | NA |
| Head-SCC         | 8294a969-59a1-4d3b-895b-f07e96bf9f7a | 19 | 23732298  | 23733941  | 8  | 1643  | 1  | 5  | 1  | NA | NA | 1  |
| Lymph-BNHL       | 82b8cda8-fbff-455e-b0db-7ff6528bd6c8 | 2  | 89157325  | 89164756  | 16 | 7431  | 1  | 2  | 11 | NA | 1  | 1  |
| Lymph-BNHL       | 82b8cda8-fbff-455e-b0db-7ff6528bd6c8 | 14 | 106110529 | 106114759 | 9  | 4230  | NA | 1  | 8  | NA | NA | NA |
| Lymph-BNHL       | 82b8cda8-fbff-455e-b0db-7ff6528bd6c8 | 14 | 106322881 | 106330585 | 26 | 7704  | NA | NA | 22 | 2  | NA | 2  |
| Lymph-BNHL       | 82b8cda8-fbff-455e-b0db-7ff6528bd6c8 | 22 | 23230138  | 23234777  | 9  | 4639  | NA | 1  | 4  | 2  | NA | 2  |
| CNS-GBM          | 82d7fa2d-19cd-41b7-8ed1-ea9fb9a544c6 | 9  | 28619306  | 28619632  | 12 | 326   | NA | NA | 12 | NA | NA | NA |
| Liver-HCC        | 83d57c5c-c622-11e3-bf01-24c6515278c0 | 3  | 86581565  | 86582340  | 6  | 775   | NA | NA | NA | 3  | 3  | NA |
| Head-SCC         | 83eca7b5-45bb-44c0-8afe-36f8988d0078 | 3  | 110983817 | 110989070 | 13 | 5253  | 4  | 3  | 6  | NA | NA | NA |
| Head-SCC         | 83eca7b5-45bb-44c0-8afe-36f8988d0078 | 3  | 193515535 | 193517494 | 7  | 1959  | NA | 6  | 1  | NA | NA | NA |
| Head-SCC         | 83eca7b5-45bb-44c0-8afe-36f8988d0078 | 4  | 46230296  | 46230803  | 8  | 507   | 2  | 3  | 3  | NA | NA | NA |
| Head-SCC         | 83eca7b5-45bb-44c0-8afe-36f8988d0078 | 5  | 3859443   | 3875510   | 18 | 16067 | 1  | 12 | 5  | NA | NA | NA |
| Head-SCC         | 83eca7b5-45bb-44c0-8afe-36f8988d0078 | 5  | 93482414  | 93486383  | 7  | 3969  | 1  | 2  | 4  | NA | NA | NA |
| Head-SCC         | 83eca7b5-45bb-44c0-8afe-36f8988d0078 | 8  | 25668439  | 25675148  | 10 | 6709  | 1  | 3  | 6  | NA | NA | NA |
| Head-SCC         | 83eca7b5-45bb-44c0-8afe-36f8988d0078 | 14 | 68663989  | 68668330  | 8  | 4341  | 2  | 2  | 4  | NA | NA | NA |
| Head-SCC         | 83eca7b5-45bb-44c0-8afe-36f8988d0078 | 18 | 6143554   | 6148113   | 10 | 4559  | 5  | 1  | 4  | NA | NA | NA |
| Panc-AdenoCA     | 8454fe53-869d-41c8-b0c8-a7929d00eec3 | 6  | 18938579  | 18940967  | 11 | 2388  | 1  | 2  | 8  | NA | NA | NA |
| Panc-AdenoCA     | 8454fe53-869d-41c8-b0c8-a7929d00eec3 | 18 | 20510481  | 20512063  | 9  | 1582  | 1  | 4  | 4  | NA | NA | NA |
| Panc-AdenoCA     | 8454fe53-869d-41c8-b0c8-a7929d00eec3 | 19 | 13197362  | 13200045  | 7  | 2683  | 1  | 4  | 2  | NA | NA | NA |
| Panc-AdenoCA     | 84a6ea88-eeb8-4060-a90c-e4abac013ad4 | 3  | 185343121 | 185343626 | 6  | 505   | NA | 3  | 3  | NA | NA | NA |
| Panc-AdenoCA     | 84a6ea88-eeb8-4060-a90c-e4abac013ad4 | 3  | 185350745 | 185351477 | 10 | 732   | 2  | 4  | 4  | NA | NA | NA |
| Breast-AdenoCa   | 84c77098-03d0-4b22-afb1-797703e85c6c | 1  | 15530506  | 15530752  | 6  | 246   | 3  | 1  | 2  | NA | NA | NA |
| Breast-AdenoCa   | 84c77098-03d0-4b22-afb1-797703e85c6c | 1  | 16643565  | 16643905  | 7  | 340   | 1  | 2  | 4  | NA | NA | NA |
| Breast-AdenoCa   | 84c77098-03d0-4b22-afb1-797703e85c6c | 1  | 76345348  | 76348969  | 7  | 3621  | 3  | 1  | 3  | NA | NA | NA |
| Breast-AdenoCa   | 84c77098-03d0-4b22-afb1-797703e85c6c | 1  | 107359332 | 107360496 | 12 | 1164  | 2  | 5  | 4  | 1  | NA | NA |
| Breast-AdenoCa   | 84c77098-03d0-4b22-afb1-797703e85c6c | 2  | 25903390  | 25904546  | 10 | 1156  | 1  | 6  | 2  | NA | NA | 1  |
| Breast-AdenoCa   | 84c77098-03d0-4b22-afb1-797703e85c6c | 2  | 206040099 | 206047901 | 26 | 7802  | 5  | 8  | 13 | NA | NA | NA |
| Breast-AdenoCa   | 84c77098-03d0-4b22-afb1-797703e85c6c | 2  | 206152841 | 206163518 | 15 | 10677 | 1  | 8  | 6  | NA | NA | NA |
| Breast-AdenoCa   | 84c77098-03d0-4b22-afb1-797703e85c6c | 2  | 207765929 | 207769783 | 26 | 3854  | 3  | 5  | 18 | NA | NA | NA |
| Breast-AdenoCa   | 84c77098-03d0-4b22-afb1-797703e85c6c | 3  | 124980879 | 124983845 | 11 | 2966  | 1  | 7  | 3  | NA | NA | NA |

|                  |                                      |    |           |           |     |       |    |    |    |    |    |    |
|------------------|--------------------------------------|----|-----------|-----------|-----|-------|----|----|----|----|----|----|
| Breast-AdenoCa   | 84c77098-03d0-4b22-afb1-797703e85c6c | 11 | 95897979  | 95900050  | 6   | 2071  | NA | 4  | 2  | NA | NA | NA |
| Breast-AdenoCa   | 84c77098-03d0-4b22-afb1-797703e85c6c | 12 | 72247592  | 72251085  | 7   | 3493  | NA | 3  | 4  | NA | NA | NA |
| Breast-AdenoCa   | 84c77098-03d0-4b22-afb1-797703e85c6c | 15 | 68109294  | 68111678  | 6   | 2384  | 1  | 4  | 1  | NA | NA | NA |
| Breast-AdenoCa   | 84c77098-03d0-4b22-afb1-797703e85c6c | 22 | 19005334  | 19007398  | 7   | 2064  | 1  | 4  | 2  | NA | NA | NA |
| Breast-AdenoCa   | 84c77098-03d0-4b22-afb1-797703e85c6c | 22 | 25364793  | 25367930  | 9   | 3137  | 2  | 2  | 5  | NA | NA | NA |
| Ovary-AdenoCA    | 84ca6ab0-9edc-4636-9d27-55cdba334d7d | 13 | 32063380  | 32076502  | 20  | 13122 | 3  | 7  | 10 | NA | NA | NA |
| Ovary-AdenoCA    | 84ca6ab0-9edc-4636-9d27-55cdba334d7d | 19 | 35823957  | 35834622  | 12  | 10665 | 2  | 4  | 6  | NA | NA | NA |
| Ovary-AdenoCA    | 84ca6ab0-9edc-4636-9d27-55cdba334d7d | X  | 36475616  | 36477925  | 9   | 2309  | 2  | 2  | 4  | NA | NA | 1  |
| Liver-HCC        | 84fe77b4-f6cc-49bf-a6b9-1621ec9394f8 | 17 | 60251125  | 60251239  | 7   | 114   | NA | 1  | 2  | 3  | 1  | NA |
| Lymph-BNHL       | 858631eb-4e91-4aad-809c-c3948519313d | 2  | 89136300  | 89146182  | 13  | 9882  | NA | 1  | 3  | 6  | 1  | 2  |
| Lymph-BNHL       | 858631eb-4e91-4aad-809c-c3948519313d | 2  | 89153907  | 89196860  | 205 | 42953 | 11 | 31 | 41 | 62 | 29 | 31 |
| Lymph-BNHL       | 858631eb-4e91-4aad-809c-c3948519313d | 2  | 89442405  | 89448022  | 25  | 5617  | NA | 4  | 6  | 7  | 1  | 7  |
| Lymph-BNHL       | 858631eb-4e91-4aad-809c-c3948519313d | 2  | 120730255 | 120730366 | 7   | 111   | NA | NA | 1  | 1  | 3  | 2  |
| Lymph-BNHL       | 858631eb-4e91-4aad-809c-c3948519313d | 2  | 136874765 | 136875264 | 16  | 499   | NA | 5  | 4  | 3  | 3  | 1  |
| Lymph-BNHL       | 858631eb-4e91-4aad-809c-c3948519313d | 3  | 76935133  | 76938210  | 7   | 3077  | NA | NA | 1  | 1  | 1  | 4  |
| Lymph-BNHL       | 858631eb-4e91-4aad-809c-c3948519313d | 3  | 186782908 | 186784219 | 11  | 1311  | NA | 2  | 5  | 1  | 1  | 2  |
| Lymph-BNHL       | 858631eb-4e91-4aad-809c-c3948519313d | 3  | 187457059 | 187463261 | 50  | 6202  | 4  | 17 | 9  | 10 | 7  | 3  |
| Lymph-BNHL       | 858631eb-4e91-4aad-809c-c3948519313d | 4  | 40195270  | 40201106  | 14  | 5836  | NA | 2  | 3  | 3  | 3  | 3  |
| Lymph-BNHL       | 858631eb-4e91-4aad-809c-c3948519313d | 5  | 124043574 | 124044543 | 10  | 969   | NA | 1  | 2  | 4  | 1  | 2  |
| Lymph-BNHL       | 858631eb-4e91-4aad-809c-c3948519313d | 5  | 124078408 | 124081153 | 8   | 2745  | NA | 1  | NA | 5  | 1  | 1  |
| Lymph-BNHL       | 858631eb-4e91-4aad-809c-c3948519313d | 6  | 14118275  | 14118949  | 11  | 674   | 1  | 1  | 8  | NA | NA | 1  |
| Lymph-BNHL       | 858631eb-4e91-4aad-809c-c3948519313d | 6  | 134493913 | 134498122 | 10  | 4209  | NA | 5  | 4  | 1  | NA | NA |
| Lymph-BNHL       | 858631eb-4e91-4aad-809c-c3948519313d | 7  | 83175404  | 83187996  | 14  | 12592 | 1  | NA | NA | 5  | 3  | 5  |
| Lymph-BNHL       | 858631eb-4e91-4aad-809c-c3948519313d | 9  | 37032927  | 37035225  | 8   | 2298  | NA | 2  | 3  | 1  | 2  | NA |
| Lymph-BNHL       | 858631eb-4e91-4aad-809c-c3948519313d | 11 | 40376717  | 40382683  | 8   | 5966  | 1  | 1  | 1  | 1  | 2  | 2  |
| Lymph-BNHL       | 858631eb-4e91-4aad-809c-c3948519313d | 11 | 102188485 | 102189225 | 9   | 740   | NA | 3  | 5  | NA | NA | 1  |
| Lymph-BNHL       | 858631eb-4e91-4aad-809c-c3948519313d | 12 | 122457884 | 122463053 | 17  | 5169  | 3  | 2  | 5  | 3  | 1  | 3  |
| Lymph-BNHL       | 858631eb-4e91-4aad-809c-c3948519313d | 14 | 69259050  | 69262445  | 6   | 3395  | NA | 1  | 4  | NA | 1  | NA |
| Lymph-BNHL       | 858631eb-4e91-4aad-809c-c3948519313d | 14 | 106240130 | 106244437 | 9   | 4307  | 1  | 1  | 5  | 2  | NA | NA |
| Lymph-BNHL       | 858631eb-4e91-4aad-809c-c3948519313d | 14 | 106325206 | 106330704 | 111 | 5498  | 5  | 28 | 38 | 12 | 9  | 19 |
| Lymph-BNHL       | 858631eb-4e91-4aad-809c-c3948519313d | 14 | 107049081 | 107049802 | 28  | 721   | 2  | 6  | 6  | 5  | 4  | 5  |
| Lymph-BNHL       | 858631eb-4e91-4aad-809c-c3948519313d | 14 | 107169791 | 107179678 | 19  | 9887  | 1  | 3  | 5  | 4  | 4  | 2  |
| Lymph-BNHL       | 858631eb-4e91-4aad-809c-c3948519313d | 16 | 78751251  | 78756120  | 7   | 4869  | NA | NA | NA | 2  | 4  | 1  |
| Lymph-BNHL       | 858631eb-4e91-4aad-809c-c3948519313d | 18 | 60984043  | 60988349  | 56  | 4306  | 3  | 10 | 13 | 16 | 5  | 9  |
| Lymph-BNHL       | 858631eb-4e91-4aad-809c-c3948519313d | 22 | 23223297  | 23281471  | 127 | 58174 | 4  | 17 | 45 | 31 | 9  | 21 |
| Lymph-BNHL       | 858631eb-4e91-4aad-809c-c3948519313d | X  | 27931593  | 27936351  | 11  | 4758  | NA | 1  | NA | 5  | 1  | 4  |
| ColoRect-AdenoCA | 85e29049-a5e8-49fa-a576-e113c7b2c2e3 | 11 | 55400610  | 55401289  | 6   | 679   | 1  | 4  | 1  | NA | NA | NA |
| ColoRect-AdenoCA | 85e29049-a5e8-49fa-a576-e113c7b2c2e3 | 11 | 123104022 | 123104895 | 7   | 873   | NA | 4  | 2  | 1  | NA | NA |
| Kidney-ChrCCC    | 85ed2434-da94-4333-90ca-6ca4691cbdd3 | 9  | 2430302   | 2435395   | 7   | 5093  | NA | 3  | 4  | NA | NA | NA |
| Ovary-AdenoCA    | 8658f4f5-9a50-4195-8ea3-227951977647 | 3  | 122831206 | 122835063 | 13  | 3857  | 6  | 2  | 5  | NA | NA | NA |
| Ovary-AdenoCA    | 8658f4f5-9a50-4195-8ea3-227951977647 | 11 | 73695595  | 73695807  | 9   | 212   | NA | NA | NA | 9  | NA | NA |
| Lymph-BNHL       | 866ecfe7-caa6-4565-9418-6b9d6c8a3b43 | 14 | 106068967 | 106069949 | 6   | 982   | NA | NA | 6  | NA | NA | NA |
| Lymph-BNHL       | 866ecfe7-caa6-4565-9418-6b9d6c8a3b43 | 14 | 106212768 | 106214196 | 24  | 1428  | 5  | 3  | 13 | 3  | NA | NA |
| Lymph-BNHL       | 866ecfe7-caa6-4565-9418-6b9d6c8a3b43 | 14 | 106238352 | 106241524 | 22  | 3172  | 1  | 4  | 16 | 1  | NA | NA |
| Lymph-BNHL       | 866ecfe7-caa6-4565-9418-6b9d6c8a3b43 | 14 | 106323787 | 106330121 | 57  | 6334  | 4  | 12 | 29 | 4  | 4  | 4  |
| Lymph-BNHL       | 866ecfe7-caa6-4565-9418-6b9d6c8a3b43 | 14 | 106994149 | 106994893 | 11  | 744   | 1  | NA | 2  | 4  | 1  | 3  |
| Lymph-BNHL       | 866ecfe7-caa6-4565-9418-6b9d6c8a3b43 | 18 | 60984697  | 60988858  | 35  | 4161  | 1  | 3  | 9  | 9  | 9  | 4  |
| Lymph-BNHL       | 866ecfe7-caa6-4565-9418-6b9d6c8a3b43 | 22 | 22676963  | 22677443  | 7   | 480   | 1  | 2  | 3  | 1  | NA | NA |
| Lymph-BNHL       | 866ecfe7-caa6-4565-9418-6b9d6c8a3b43 | 22 | 22697598  | 22697757  | 7   | 159   | 2  | NA | 2  | NA | 3  | NA |
| Lymph-BNHL       | 866ecfe7-caa6-4565-9418-6b9d6c8a3b43 | 22 | 23260393  | 23295546  | 89  | 35153 | 4  | 20 | 32 | 19 | 11 | 3  |
| Prost-AdenoCA    | 86874a67-aa86-45f1-be32-3b2722ebdec  | 5  | 42294241  | 42295040  | 12  | 799   | NA | 2  | 10 | NA | NA | NA |
| Prost-AdenoCA    | 86874a67-aa86-45f1-be32-3b2722ebdec  | 5  | 106855787 | 106856362 | 9   | 575   | NA | 2  | 7  | NA | NA | NA |
| Prost-AdenoCA    | 8689b53c-8883-479c-85f6-d13b86272b5d | 4  | 59515125  | 59517064  | 6   | 1939  | NA | 2  | 4  | NA | NA | NA |
| Prost-AdenoCA    | 8689b53c-8883-479c-85f6-d13b86272b5d | 7  | 48086666  | 48087227  | 6   | 561   | NA | NA | 6  | NA | NA | NA |
| Breast-AdenoCa   | 8691c87f-2468-44bb-a670-3dccc6da33c6 | 3  | 74461716  | 74464162  | 8   | 2446  | 2  | 3  | 3  | NA | NA | NA |
| Breast-AdenoCa   | 8691c87f-2468-44bb-a670-3dccc6da33c6 | 4  | 191031466 | 191036698 | 12  | 5232  | NA | 7  | 5  | NA | NA | NA |
| Breast-AdenoCa   | 8691c87f-2468-44bb-a670-3dccc6da33c6 | 5  | 152027954 | 152028740 | 7   | 786   | 2  | 4  | 1  | NA | NA | NA |
| Breast-AdenoCa   | 8691c87f-2468-44bb-a670-3dccc6da33c6 | 6  | 155418119 | 155421420 | 7   | 3301  | NA | 1  | 6  | NA | NA | NA |
| Breast-AdenoCa   | 8691c87f-2468-44bb-a670-3dccc6da33c6 | 8  | 43552478  | 43567610  | 29  | 15132 | 3  | 5  | 21 | NA | NA | NA |
| Breast-AdenoCa   | 8691c87f-2468-44bb-a670-3dccc6da33c6 | 10 | 37645202  | 37650452  | 7   | 5250  | 1  | 3  | 3  | NA | NA | NA |

|                 |                                      |    |           |           |     |       |    |    |    |    |    |    |
|-----------------|--------------------------------------|----|-----------|-----------|-----|-------|----|----|----|----|----|----|
| Breast-AdenoCa  | 8691c87f-2468-44bb-a670-3dccc6da33c6 | 17 | 36513792  | 36514825  | 12  | 1033  | 2  | 6  | 4  | NA | NA | NA |
| Breast-AdenoCa  | 8691c87f-2468-44bb-a670-3dccc6da33c6 | 18 | 35186849  | 35192210  | 8   | 5361  | 2  | 1  | 5  | NA | NA | NA |
| Breast-AdenoCa  | 8691c87f-2468-44bb-a670-3dccc6da33c6 | 19 | 11463007  | 11466478  | 6   | 3471  | NA | 2  | 4  | NA | NA | NA |
| Breast-AdenoCa  | 8691c87f-2468-44bb-a670-3dccc6da33c6 | 19 | 11471456  | 11476245  | 7   | 4789  | NA | 5  | 2  | NA | NA | NA |
| Breast-AdenoCa  | 8691c87f-2468-44bb-a670-3dccc6da33c6 | 20 | 25303457  | 25304165  | 10  | 708   | 1  | 5  | 4  | NA | NA | NA |
| Breast-AdenoCa  | 8691c87f-2468-44bb-a670-3dccc6da33c6 | 22 | 23393774  | 23394463  | 11  | 689   | 2  | 5  | 3  | NA | NA | 1  |
| Ovary-AdenoCA   | 86f23897-dba0-4e89-8381-d174eaa6fcc1 | 3  | 99185009  | 99187297  | 8   | 2288  | 1  | 6  | 1  | NA | NA | NA |
| Ovary-AdenoCA   | 86f23897-dba0-4e89-8381-d174eaa6fcc1 | 4  | 13766385  | 13780227  | 20  | 13842 | 2  | 11 | 7  | NA | NA | NA |
| Ovary-AdenoCA   | 86f23897-dba0-4e89-8381-d174eaa6fcc1 | 4  | 85255984  | 85260349  | 11  | 4365  | 1  | 4  | 6  | NA | NA | NA |
| Ovary-AdenoCA   | 86f23897-dba0-4e89-8381-d174eaa6fcc1 | 4  | 148499091 | 148512539 | 17  | 13448 | 4  | 8  | 5  | NA | NA | NA |
| Ovary-AdenoCA   | 86f23897-dba0-4e89-8381-d174eaa6fcc1 | 5  | 60560930  | 60571650  | 20  | 10720 | 5  | 11 | 4  | NA | NA | NA |
| Ovary-AdenoCA   | 86f23897-dba0-4e89-8381-d174eaa6fcc1 | 6  | 27269039  | 27276375  | 13  | 7336  | 3  | 9  | 1  | NA | NA | NA |
| Ovary-AdenoCA   | 86f23897-dba0-4e89-8381-d174eaa6fcc1 | 7  | 552087    | 554233    | 6   | 2146  | 1  | 4  | 1  | NA | NA | NA |
| Ovary-AdenoCA   | 86f23897-dba0-4e89-8381-d174eaa6fcc1 | 8  | 36956079  | 36956352  | 6   | 273   | NA | 4  | 2  | NA | NA | NA |
| Ovary-AdenoCA   | 86f23897-dba0-4e89-8381-d174eaa6fcc1 | 16 | 47977955  | 47983287  | 7   | 5332  | 3  | NA | 4  | NA | NA | NA |
| Ovary-AdenoCA   | 86f23897-dba0-4e89-8381-d174eaa6fcc1 | 18 | 23582963  | 23584291  | 15  | 1328  | 5  | 8  | 2  | NA | NA | NA |
| Liver-HCC       | 87671312-c622-11e3-bf01-24c6515278c0 | 7  | 21266797  | 21268230  | 14  | 1433  | 3  | 4  | 7  | NA | NA | NA |
| Head-SCC        | 878a7fe7-20ff-4651-9587-b4d6fd42e929 | 8  | 39368225  | 39368825  | 6   | 600   | NA | 6  | NA | NA | NA | NA |
| Head-SCC        | 878a7fe7-20ff-4651-9587-b4d6fd42e929 | 10 | 100218324 | 100221600 | 37  | 3276  | 1  | 13 | 23 | NA | NA | NA |
| Head-SCC        | 878a7fe7-20ff-4651-9587-b4d6fd42e929 | 18 | 64339335  | 64339750  | 6   | 415   | NA | 2  | 4  | NA | NA | NA |
| Stomach-AdenoCA | 8867bdef-3a8d-433e-b10f-d752e2cbb022 | 10 | 100085639 | 100093041 | 11  | 7402  | 3  | 4  | 4  | NA | NA | NA |
| Stomach-AdenoCA | 8867bdef-3a8d-433e-b10f-d752e2cbb022 | 13 | 105854897 | 105861270 | 9   | 6373  | 1  | NA | NA | 6  | 1  | 1  |
| Stomach-AdenoCA | 8867bdef-3a8d-433e-b10f-d752e2cbb022 | X  | 112855891 | 112862540 | 9   | 6649  | NA | NA | NA | 5  | 1  | 3  |
| Prost-AdenoCA   | 887616c5-06a7-4e83-948c-3546202349fb | 3  | 90420160  | 90425758  | 9   | 5598  | 1  | NA | 3  | 3  | 2  | NA |
| Prost-AdenoCA   | 887616c5-06a7-4e83-948c-3546202349fb | 4  | 98339624  | 98344237  | 8   | 4613  | NA | NA | 2  | 5  | NA | 1  |
| Prost-AdenoCA   | 887616c5-06a7-4e83-948c-3546202349fb | 11 | 56222604  | 56227532  | 6   | 4928  | 1  | 1  | 1  | 1  | 2  | NA |
| Prost-AdenoCA   | 887616c5-06a7-4e83-948c-3546202349fb | X  | 66195364  | 66197224  | 7   | 1860  | 2  | 1  | 3  | NA | 1  | NA |
| Ovary-AdenoCA   | 8888e808-594b-4c76-b2e4-62aa56736f7c | 12 | 90731586  | 90733935  | 25  | 2349  | NA | 14 | 11 | NA | NA | NA |
| Panc-AdenoCA    | 88d5a8b2-daba-45ce-90bf-480fac85bf1d | 12 | 28908883  | 28909886  | 13  | 1003  | NA | 4  | 9  | NA | NA | NA |
| Lymph-BNHL      | 890e840c-1d1d-4874-a8eb-f9d9a2b50a1c | 1  | 163980386 | 163982076 | 8   | 1690  | NA | NA | NA | 4  | 2  | 2  |
| Lymph-BNHL      | 890e840c-1d1d-4874-a8eb-f9d9a2b50a1c | 1  | 172148405 | 172153396 | 25  | 4991  | 2  | 1  | 3  | 15 | NA | 4  |
| Lymph-BNHL      | 890e840c-1d1d-4874-a8eb-f9d9a2b50a1c | 2  | 58250161  | 58251919  | 9   | 1758  | 1  | 1  | NA | 5  | NA | 2  |
| Lymph-BNHL      | 890e840c-1d1d-4874-a8eb-f9d9a2b50a1c | 2  | 89127828  | 89128862  | 7   | 1034  | 2  | 2  | NA | NA | 2  | 1  |
| Lymph-BNHL      | 890e840c-1d1d-4874-a8eb-f9d9a2b50a1c | 2  | 89137621  | 89155570  | 20  | 17949 | 2  | 1  | 2  | 5  | 8  | 2  |
| Lymph-BNHL      | 890e840c-1d1d-4874-a8eb-f9d9a2b50a1c | 2  | 89159103  | 89196835  | 142 | 37732 | 9  | 19 | 17 | 45 | 27 | 25 |
| Lymph-BNHL      | 890e840c-1d1d-4874-a8eb-f9d9a2b50a1c | 2  | 136875225 | 136875487 | 11  | 262   | NA | 1  | 4  | 3  | 1  | 2  |
| Lymph-BNHL      | 890e840c-1d1d-4874-a8eb-f9d9a2b50a1c | 2  | 205536186 | 205539621 | 10  | 3435  | NA | NA | 2  | 4  | 3  | 1  |
| Lymph-BNHL      | 890e840c-1d1d-4874-a8eb-f9d9a2b50a1c | 3  | 117117428 | 117122359 | 7   | 4931  | 1  | 1  | NA | 2  | 1  | 2  |
| Lymph-BNHL      | 890e840c-1d1d-4874-a8eb-f9d9a2b50a1c | 3  | 163660853 | 163668548 | 12  | 7695  | 1  | 1  | 1  | 5  | 1  | 3  |
| Lymph-BNHL      | 890e840c-1d1d-4874-a8eb-f9d9a2b50a1c | 3  | 187462600 | 187462946 | 7   | 346   | NA | 1  | 3  | 3  | NA | NA |
| Lymph-BNHL      | 890e840c-1d1d-4874-a8eb-f9d9a2b50a1c | 4  | 62976892  | 62980326  | 6   | 3434  | NA | NA | 1  | 1  | NA | 4  |
| Lymph-BNHL      | 890e840c-1d1d-4874-a8eb-f9d9a2b50a1c | 5  | 19515294  | 19517245  | 7   | 1951  | 1  | NA | 2  | 1  | NA | 3  |
| Lymph-BNHL      | 890e840c-1d1d-4874-a8eb-f9d9a2b50a1c | 5  | 102166564 | 102171284 | 8   | 4720  | 1  | 1  | 2  | 1  | 1  | 2  |
| Lymph-BNHL      | 890e840c-1d1d-4874-a8eb-f9d9a2b50a1c | 6  | 63012119  | 63014138  | 6   | 2019  | NA | NA | NA | 3  | 2  | 1  |
| Lymph-BNHL      | 890e840c-1d1d-4874-a8eb-f9d9a2b50a1c | 9  | 113376051 | 113378471 | 7   | 2420  | NA | NA | NA | 4  | 1  | 2  |
| Lymph-BNHL      | 890e840c-1d1d-4874-a8eb-f9d9a2b50a1c | 11 | 109295946 | 109299095 | 8   | 3149  | NA | 1  | NA | 2  | 3  | 2  |
| Lymph-BNHL      | 890e840c-1d1d-4874-a8eb-f9d9a2b50a1c | 12 | 25251244  | 25259988  | 24  | 8744  | NA | NA | NA | 9  | 5  | 10 |
| Lymph-BNHL      | 890e840c-1d1d-4874-a8eb-f9d9a2b50a1c | 12 | 33757237  | 33764583  | 11  | 7346  | 3  | NA | 2  | 4  | NA | 2  |
| Lymph-BNHL      | 890e840c-1d1d-4874-a8eb-f9d9a2b50a1c | 12 | 122458508 | 122462064 | 12  | 3556  | NA | 5  | 3  | 1  | 2  | 1  |
| Lymph-BNHL      | 890e840c-1d1d-4874-a8eb-f9d9a2b50a1c | 13 | 30266200  | 30270310  | 7   | 4110  | 1  | 5  | 1  | NA | NA | NA |
| Lymph-BNHL      | 890e840c-1d1d-4874-a8eb-f9d9a2b50a1c | 14 | 106039977 | 106044243 | 10  | 4266  | NA | 3  | 1  | 2  | 3  | 1  |
| Lymph-BNHL      | 890e840c-1d1d-4874-a8eb-f9d9a2b50a1c | 14 | 106112255 | 106113420 | 7   | 1165  | NA | 3  | 4  | NA | NA | NA |
| Lymph-BNHL      | 890e840c-1d1d-4874-a8eb-f9d9a2b50a1c | 14 | 106326500 | 106329842 | 53  | 3342  | 4  | 15 | 15 | 6  | 7  | 6  |
| Lymph-BNHL      | 890e840c-1d1d-4874-a8eb-f9d9a2b50a1c | 14 | 106692133 | 106692945 | 15  | 812   | NA | 1  | 7  | 5  | NA | 2  |
| Lymph-BNHL      | 890e840c-1d1d-4874-a8eb-f9d9a2b50a1c | 17 | 29641068  | 29641197  | 6   | 129   | NA | NA | NA | 4  | NA | 2  |
| Lymph-BNHL      | 890e840c-1d1d-4874-a8eb-f9d9a2b50a1c | 18 | 27957535  | 27964421  | 8   | 6886  | NA | NA | 1  | 4  | NA | 3  |
| Lymph-BNHL      | 890e840c-1d1d-4874-a8eb-f9d9a2b50a1c | 18 | 60794650  | 60795751  | 8   | 1101  | NA | 2  | 2  | 2  | NA | 2  |
| Lymph-BNHL      | 890e840c-1d1d-4874-a8eb-f9d9a2b50a1c | 18 | 60984760  | 60988537  | 68  | 3777  | 3  | 14 | 21 | 17 | 6  | 7  |
| Lymph-BNHL      | 890e840c-1d1d-4874-a8eb-f9d9a2b50a1c | 22 | 22707580  | 22712196  | 9   | 4616  | NA | 2  | 3  | 4  | NA | NA |
| Lymph-BNHL      | 890e840c-1d1d-4874-a8eb-f9d9a2b50a1c | 22 | 23222368  | 23293310  | 75  | 70942 | 5  | 9  | 25 | 18 | 11 | 7  |

|               |                                      |    |           |           |    |      |    |    |    |    |    |    |
|---------------|--------------------------------------|----|-----------|-----------|----|------|----|----|----|----|----|----|
| Lymph-BNHL    | 890e840c-1d1d-4874-a8eb-f9d9a2b50a1c | 22 | 46182540  | 46190173  | 17 | 7633 | NA | NA | 2  | 5  | 3  | 7  |
| Lymph-BNHL    | 890e840c-1d1d-4874-a8eb-f9d9a2b50a1c | X  | 4322805   | 4324526   | 6  | 1721 | NA | 1  | NA | 3  | 2  | NA |
| Panc-AdenoCA  | 89195d56-1ef2-41df-b200-9f18e38f574a | 1  | 145033530 | 145035453 | 8  | 1923 | NA | NA | 8  | NA | NA | NA |
| Panc-AdenoCA  | 89195d56-1ef2-41df-b200-9f18e38f574a | 1  | 145045076 | 145046355 | 11 | 1279 | NA | 6  | 5  | NA | NA | NA |
| Panc-AdenoCA  | 89195d56-1ef2-41df-b200-9f18e38f574a | 1  | 152695117 | 152700365 | 8  | 5248 | NA | 1  | 6  | NA | 1  | NA |
| Panc-AdenoCA  | 89195d56-1ef2-41df-b200-9f18e38f574a | 1  | 242822102 | 242827601 | 14 | 5499 | NA | 3  | 10 | NA | NA | 1  |
| Panc-AdenoCA  | 89195d56-1ef2-41df-b200-9f18e38f574a | 1  | 246082447 | 246082623 | 8  | 176  | NA | 5  | 3  | NA | NA | NA |
| Panc-AdenoCA  | 89195d56-1ef2-41df-b200-9f18e38f574a | 2  | 137643527 | 137644244 | 11 | 717  | NA | NA | 11 | NA | NA | NA |
| Panc-AdenoCA  | 89195d56-1ef2-41df-b200-9f18e38f574a | 2  | 137724600 | 137729558 | 27 | 4958 | 1  | 4  | 22 | NA | NA | NA |
| Panc-AdenoCA  | 89195d56-1ef2-41df-b200-9f18e38f574a | 2  | 138497049 | 138501494 | 18 | 4445 | NA | NA | 18 | NA | NA | NA |
| Panc-AdenoCA  | 89195d56-1ef2-41df-b200-9f18e38f574a | 2  | 140332286 | 140335729 | 8  | 3443 | 1  | 2  | 5  | NA | NA | NA |
| Panc-AdenoCA  | 89195d56-1ef2-41df-b200-9f18e38f574a | 2  | 140680670 | 140682144 | 8  | 1474 | NA | NA | 8  | NA | NA | NA |
| Panc-AdenoCA  | 89195d56-1ef2-41df-b200-9f18e38f574a | 2  | 172986453 | 172989949 | 8  | 3496 | 2  | 2  | 4  | NA | NA | NA |
| Panc-AdenoCA  | 89195d56-1ef2-41df-b200-9f18e38f574a | 3  | 157365137 | 157367068 | 8  | 1931 | NA | NA | 7  | NA | 1  | NA |
| Panc-AdenoCA  | 89195d56-1ef2-41df-b200-9f18e38f574a | 3  | 158614113 | 158615515 | 10 | 1402 | NA | NA | 10 | NA | NA | NA |
| Panc-AdenoCA  | 89195d56-1ef2-41df-b200-9f18e38f574a | 3  | 184647489 | 184650785 | 16 | 3296 | NA | 3  | 13 | NA | NA | NA |
| Panc-AdenoCA  | 89195d56-1ef2-41df-b200-9f18e38f574a | 4  | 30903152  | 30903636  | 8  | 484  | 2  | 5  | 1  | NA | NA | NA |
| Panc-AdenoCA  | 89195d56-1ef2-41df-b200-9f18e38f574a | 4  | 31775839  | 31782713  | 30 | 6874 | NA | NA | 30 | NA | NA | NA |
| Panc-AdenoCA  | 89195d56-1ef2-41df-b200-9f18e38f574a | 5  | 1509965   | 1511503   | 7  | 1538 | 2  | 3  | 2  | NA | NA | NA |
| Panc-AdenoCA  | 89195d56-1ef2-41df-b200-9f18e38f574a | 5  | 44696673  | 44698860  | 8  | 2187 | 1  | 4  | 2  | NA | 1  | NA |
| Panc-AdenoCA  | 89195d56-1ef2-41df-b200-9f18e38f574a | 6  | 51403817  | 51404629  | 8  | 812  | NA | 2  | 6  | NA | NA | NA |
| Panc-AdenoCA  | 89195d56-1ef2-41df-b200-9f18e38f574a | 6  | 77223475  | 77223893  | 8  | 418  | 1  | 1  | 6  | NA | NA | NA |
| Panc-AdenoCA  | 89195d56-1ef2-41df-b200-9f18e38f574a | 6  | 89069564  | 89070065  | 9  | 501  | NA | 4  | 5  | NA | NA | NA |
| Panc-AdenoCA  | 89195d56-1ef2-41df-b200-9f18e38f574a | 7  | 77832131  | 77832224  | 6  | 93   | 1  | NA | 4  | NA | NA | 1  |
| Panc-AdenoCA  | 89195d56-1ef2-41df-b200-9f18e38f574a | 8  | 31335638  | 31336354  | 8  | 716  | NA | 2  | 6  | NA | NA | NA |
| Panc-AdenoCA  | 89195d56-1ef2-41df-b200-9f18e38f574a | 8  | 100572584 | 100576151 | 18 | 3567 | 6  | 3  | 7  | NA | NA | 2  |
| Panc-AdenoCA  | 89195d56-1ef2-41df-b200-9f18e38f574a | 8  | 105502518 | 105504407 | 9  | 1889 | NA | NA | 9  | NA | NA | NA |
| Panc-AdenoCA  | 89195d56-1ef2-41df-b200-9f18e38f574a | 9  | 23856196  | 23857163  | 6  | 967  | NA | 3  | 3  | NA | NA | NA |
| Panc-AdenoCA  | 89195d56-1ef2-41df-b200-9f18e38f574a | 9  | 110272956 | 110273897 | 7  | 941  | 1  | 3  | 3  | NA | NA | NA |
| Panc-AdenoCA  | 89195d56-1ef2-41df-b200-9f18e38f574a | 10 | 57218007  | 57218357  | 6  | 350  | 2  | 3  | 1  | NA | NA | NA |
| Panc-AdenoCA  | 89195d56-1ef2-41df-b200-9f18e38f574a | 12 | 108467742 | 108469493 | 6  | 1751 | 2  | 2  | 2  | NA | NA | NA |
| Panc-AdenoCA  | 89195d56-1ef2-41df-b200-9f18e38f574a | 14 | 104427851 | 104431191 | 9  | 3340 | 5  | 3  | 1  | NA | NA | NA |
| Panc-AdenoCA  | 89195d56-1ef2-41df-b200-9f18e38f574a | 15 | 51187103  | 51188648  | 13 | 1545 | 4  | 8  | 1  | NA | NA | NA |
| Panc-AdenoCA  | 89195d56-1ef2-41df-b200-9f18e38f574a | 15 | 82063546  | 82068809  | 8  | 5263 | 1  | 2  | 5  | NA | NA | NA |
| Panc-AdenoCA  | 89195d56-1ef2-41df-b200-9f18e38f574a | 16 | 62699668  | 62709136  | 47 | 9468 | 2  | 22 | 22 | NA | 1  | NA |
| Panc-AdenoCA  | 89195d56-1ef2-41df-b200-9f18e38f574a | 16 | 63573871  | 63576983  | 9  | 3112 | NA | 4  | 5  | NA | NA | NA |
| Panc-AdenoCA  | 89195d56-1ef2-41df-b200-9f18e38f574a | 16 | 73374984  | 73376126  | 7  | 1142 | NA | 4  | 3  | NA | NA | NA |
| Panc-AdenoCA  | 89195d56-1ef2-41df-b200-9f18e38f574a | 19 | 54468150  | 54468468  | 6  | 318  | 1  | 1  | 3  | NA | NA | 1  |
| Ovary-AdenoCA | 89dad92e-5b3f-479a-a6da-a94ee7df7f8a | 2  | 240702163 | 240708324 | 9  | 6161 | NA | 3  | 6  | NA | NA | NA |
| Ovary-AdenoCA | 89dad92e-5b3f-479a-a6da-a94ee7df7f8a | 9  | 16422982  | 16425537  | 8  | 2555 | 2  | 3  | 3  | NA | NA | NA |
| Ovary-AdenoCA | 89dad92e-5b3f-479a-a6da-a94ee7df7f8a | 9  | 81280493  | 81283747  | 7  | 3254 | NA | 3  | 4  | NA | NA | NA |
| Liver-HCC     | 8b0c4c91-2d07-4a9b-97a1-d2bda003437e | 5  | 127310141 | 127310710 | 6  | 569  | 1  | 1  | 3  | NA | NA | 1  |
| Liver-HCC     | 8b0c4c91-2d07-4a9b-97a1-d2bda003437e | 8  | 27485687  | 27487973  | 8  | 2286 | NA | 8  | NA | NA | NA | NA |
| Liver-HCC     | 8b0c4c91-2d07-4a9b-97a1-d2bda003437e | 11 | 68427979  | 68430273  | 7  | 2294 | 1  | 4  | 2  | NA | NA | NA |
| Ovary-AdenoCA | 8b28f6d2-4b7d-493b-826e-b119a4fb0cb4 | 3  | 179195308 | 179195433 | 6  | 125  | 3  | 1  | 2  | NA | NA | NA |
| Ovary-AdenoCA | 8b28f6d2-4b7d-493b-826e-b119a4fb0cb4 | 3  | 187075312 | 187077611 | 7  | 2299 | 3  | 3  | 1  | NA | NA | NA |
| Ovary-AdenoCA | 8b28f6d2-4b7d-493b-826e-b119a4fb0cb4 | 3  | 197702772 | 197704929 | 8  | 2157 | 5  | 2  | NA | 1  | NA | NA |
| Ovary-AdenoCA | 8b28f6d2-4b7d-493b-826e-b119a4fb0cb4 | 7  | 145387393 | 145391016 | 7  | 3623 | 2  | 4  | 1  | NA | NA | NA |
| Ovary-AdenoCA | 8b28f6d2-4b7d-493b-826e-b119a4fb0cb4 | 17 | 43459733  | 43464068  | 9  | 4335 | 4  | 4  | 1  | NA | NA | NA |
| Cervix-SCC    | 8be2b0f5-7bad-4720-b13c-e95b32bdb933 | 1  | 8594573   | 8599935   | 8  | 5362 | 1  | 2  | 5  | NA | NA | NA |
| Cervix-SCC    | 8be2b0f5-7bad-4720-b13c-e95b32bdb933 | 2  | 228230150 | 228234162 | 6  | 4012 | 1  | 4  | 1  | NA | NA | NA |
| Cervix-SCC    | 8be2b0f5-7bad-4720-b13c-e95b32bdb933 | 3  | 122485007 | 122486871 | 6  | 1864 | 2  | 2  | 2  | NA | NA | NA |
| Cervix-SCC    | 8be2b0f5-7bad-4720-b13c-e95b32bdb933 | 4  | 187149421 | 187151849 | 11 | 2428 | 2  | 8  | 1  | NA | NA | NA |
| Cervix-SCC    | 8be2b0f5-7bad-4720-b13c-e95b32bdb933 | 5  | 131250529 | 131254048 | 8  | 3519 | 1  | 6  | 1  | NA | NA | NA |
| Cervix-SCC    | 8be2b0f5-7bad-4720-b13c-e95b32bdb933 | 6  | 51309102  | 51311250  | 9  | 2148 | 2  | 6  | 1  | NA | NA | NA |
| Cervix-SCC    | 8be2b0f5-7bad-4720-b13c-e95b32bdb933 | 6  | 53421114  | 53428872  | 10 | 7758 | 2  | 5  | 3  | NA | NA | NA |
| Cervix-SCC    | 8be2b0f5-7bad-4720-b13c-e95b32bdb933 | 6  | 101247803 | 101253504 | 7  | 5701 | 1  | 6  | NA | NA | NA | NA |
| Cervix-SCC    | 8be2b0f5-7bad-4720-b13c-e95b32bdb933 | 10 | 75606311  | 75611865  | 10 | 5554 | 2  | 4  | 4  | NA | NA | NA |
| Cervix-SCC    | 8be2b0f5-7bad-4720-b13c-e95b32bdb933 | 11 | 108310513 | 108312818 | 6  | 2305 | NA | 3  | 3  | NA | NA | NA |
| Cervix-SCC    | 8be2b0f5-7bad-4720-b13c-e95b32bdb933 | 12 | 26601073  | 26603283  | 6  | 2210 | NA | 3  | 3  | NA | NA | NA |

|                |                                      |    |           |           |    |       |    |    |    |    |    |    |
|----------------|--------------------------------------|----|-----------|-----------|----|-------|----|----|----|----|----|----|
| Cervix-SCC     | 8be2b0f5-7bad-4720-b13c-e95b32bdb933 | 12 | 53331858  | 53336796  | 8  | 4938  | 3  | 2  | 3  | NA | NA | NA |
| Cervix-SCC     | 8be2b0f5-7bad-4720-b13c-e95b32bdb933 | 12 | 54082102  | 54088500  | 14 | 6398  | 3  | 5  | 6  | NA | NA | NA |
| Cervix-SCC     | 8be2b0f5-7bad-4720-b13c-e95b32bdb933 | 16 | 29812898  | 29815719  | 6  | 2821  | 1  | 4  | 1  | NA | NA | NA |
| Cervix-SCC     | 8be2b0f5-7bad-4720-b13c-e95b32bdb933 | 18 | 47511294  | 47513369  | 6  | 2075  | 1  | 4  | 1  | NA | NA | NA |
| Panc-AdenoCA   | 8be6b14d-286a-471b-a282-ab98bc6050c3 | 17 | 54581085  | 54581342  | 8  | 257   | NA | 2  | 6  | NA | NA | NA |
| Panc-AdenoCA   | 8c233a11-3b2e-4273-bbe1-b5a5f5a351d5 | 6  | 115383665 | 115385874 | 19 | 2209  | 2  | 12 | 5  | NA | NA | NA |
| Bladder-TCC    | 8c619cbc-9e91-4716-9711-5236e55d8f46 | 1  | 92148777  | 92152036  | 6  | 3259  | NA | 3  | 3  | NA | NA | NA |
| Bladder-TCC    | 8c619cbc-9e91-4716-9711-5236e55d8f46 | 1  | 93973591  | 93975618  | 7  | 2027  | 1  | 3  | 3  | NA | NA | NA |
| Bladder-TCC    | 8c619cbc-9e91-4716-9711-5236e55d8f46 | 2  | 9153085   | 9155750   | 7  | 2665  | NA | 4  | 3  | NA | NA | NA |
| Bladder-TCC    | 8c619cbc-9e91-4716-9711-5236e55d8f46 | 2  | 10009452  | 10011898  | 9  | 2446  | NA | 3  | 6  | NA | NA | NA |
| Bladder-TCC    | 8c619cbc-9e91-4716-9711-5236e55d8f46 | 3  | 48545521  | 48546724  | 8  | 1203  | NA | 4  | 4  | NA | NA | NA |
| Bladder-TCC    | 8c619cbc-9e91-4716-9711-5236e55d8f46 | 3  | 49242193  | 49252292  | 17 | 10099 | 2  | 4  | 11 | NA | NA | NA |
| Bladder-TCC    | 8c619cbc-9e91-4716-9711-5236e55d8f46 | 3  | 61976417  | 61979784  | 11 | 3367  | NA | 2  | 9  | NA | NA | NA |
| Bladder-TCC    | 8c619cbc-9e91-4716-9711-5236e55d8f46 | 3  | 171163548 | 171164579 | 8  | 1031  | 1  | 3  | 4  | NA | NA | NA |
| Bladder-TCC    | 8c619cbc-9e91-4716-9711-5236e55d8f46 | 4  | 86253152  | 86253756  | 6  | 604   | NA | 3  | 3  | NA | NA | NA |
| Bladder-TCC    | 8c619cbc-9e91-4716-9711-5236e55d8f46 | 7  | 3067730   | 3069540   | 6  | 1810  | NA | 1  | 5  | NA | NA | NA |
| Bladder-TCC    | 8c619cbc-9e91-4716-9711-5236e55d8f46 | 9  | 93506807  | 93513193  | 9  | 6386  | 2  | 6  | 1  | NA | NA | NA |
| Bladder-TCC    | 8c619cbc-9e91-4716-9711-5236e55d8f46 | 10 | 72116601  | 72117344  | 7  | 743   | 1  | 3  | 3  | NA | NA | NA |
| Bladder-TCC    | 8c619cbc-9e91-4716-9711-5236e55d8f46 | 10 | 94835970  | 94840921  | 20 | 4951  | NA | NA | 20 | NA | NA | NA |
| Bladder-TCC    | 8c619cbc-9e91-4716-9711-5236e55d8f46 | 10 | 96182250  | 96182614  | 7  | 364   | NA | NA | 7  | NA | NA | NA |
| Bladder-TCC    | 8c619cbc-9e91-4716-9711-5236e55d8f46 | 11 | 32993900  | 32997700  | 9  | 3800  | NA | 2  | 7  | NA | NA | NA |
| Bladder-TCC    | 8c619cbc-9e91-4716-9711-5236e55d8f46 | 12 | 130141763 | 130143814 | 7  | 2051  | NA | 4  | 3  | NA | NA | NA |
| Bladder-TCC    | 8c619cbc-9e91-4716-9711-5236e55d8f46 | 13 | 35397263  | 35398520  | 8  | 1257  | NA | 5  | 3  | NA | NA | NA |
| Bladder-TCC    | 8c619cbc-9e91-4716-9711-5236e55d8f46 | 13 | 113390419 | 113392008 | 7  | 1589  | NA | 6  | 1  | NA | NA | NA |
| Bladder-TCC    | 8c619cbc-9e91-4716-9711-5236e55d8f46 | 15 | 44059518  | 44062272  | 6  | 2754  | NA | 5  | 1  | NA | NA | NA |
| Bladder-TCC    | 8c619cbc-9e91-4716-9711-5236e55d8f46 | 16 | 1614648   | 1616760   | 6  | 2112  | NA | 4  | 2  | NA | NA | NA |
| Bladder-TCC    | 8c619cbc-9e91-4716-9711-5236e55d8f46 | 16 | 5392921   | 5394051   | 7  | 1130  | 1  | 4  | 2  | NA | NA | NA |
| Bladder-TCC    | 8c619cbc-9e91-4716-9711-5236e55d8f46 | 16 | 69246914  | 69249649  | 11 | 2735  | NA | 3  | 8  | NA | NA | NA |
| Bladder-TCC    | 8c619cbc-9e91-4716-9711-5236e55d8f46 | 16 | 89687613  | 89691059  | 13 | 3446  | 1  | 2  | 10 | NA | NA | NA |
| Bladder-TCC    | 8c619cbc-9e91-4716-9711-5236e55d8f46 | 17 | 42295998  | 42296024  | 6  | 26    | 1  | NA | 5  | NA | NA | NA |
| Bladder-TCC    | 8c619cbc-9e91-4716-9711-5236e55d8f46 | 18 | 54134932  | 54137300  | 7  | 2368  | NA | 5  | 2  | NA | NA | NA |
| Bladder-TCC    | 8c619cbc-9e91-4716-9711-5236e55d8f46 | 19 | 38785101  | 38791204  | 12 | 6103  | 3  | 6  | 3  | NA | NA | NA |
| Bladder-TCC    | 8c619cbc-9e91-4716-9711-5236e55d8f46 | 20 | 61493696  | 61495438  | 7  | 1742  | NA | 6  | 1  | NA | NA | NA |
| Bladder-TCC    | 8c619cbc-9e91-4716-9711-5236e55d8f46 | X  | 44946763  | 44947175  | 9  | 412   | 2  | 7  | NA | NA | NA | NA |
| Panc-Endocrine | 8cbd1752-7eea-46d3-8623-09e96dfb1fdf | 7  | 150201626 | 150207303 | 12 | 5677  | 2  | 4  | 6  | NA | NA | NA |
| Lymph-CLL      | 8cce153d-953d-40c5-976b-60f6a143608c | 2  | 89158784  | 89165307  | 37 | 6523  | 1  | 5  | 5  | 15 | 5  | 6  |
| Lymph-CLL      | 8cce153d-953d-40c5-976b-60f6a143608c | 2  | 89246876  | 89248722  | 15 | 1846  | 1  | 1  | 4  | 8  | 1  | NA |
| Lymph-CLL      | 8cce153d-953d-40c5-976b-60f6a143608c | 14 | 106324868 | 106363851 | 54 | 38983 | 2  | 15 | 13 | 14 | 4  | 6  |
| Lymph-CLL      | 8cce153d-953d-40c5-976b-60f6a143608c | 14 | 106494165 | 106494403 | 9  | 238   | 1  | 1  | 2  | 2  | 2  | 1  |
| Lymph-CLL      | 8cce153d-953d-40c5-976b-60f6a143608c | 22 | 23227725  | 23234934  | 11 | 7209  | 3  | 3  | 1  | 2  | 2  | NA |
| Lung-SCC       | 8cf9b32d-3d6f-4898-8c7a-89511b754021 | 1  | 78505578  | 78508841  | 6  | 3263  | 1  | 1  | 4  | NA | NA | NA |
| Lung-SCC       | 8cf9b32d-3d6f-4898-8c7a-89511b754021 | 2  | 164457868 | 164462716 | 9  | 4848  | 2  | 4  | 3  | NA | NA | NA |
| Lung-SCC       | 8cf9b32d-3d6f-4898-8c7a-89511b754021 | 7  | 17422394  | 17424069  | 6  | 1675  | 1  | 3  | 2  | NA | NA | NA |
| Lung-SCC       | 8cf9b32d-3d6f-4898-8c7a-89511b754021 | 9  | 20862683  | 20863628  | 10 | 945   | 3  | 5  | 2  | NA | NA | NA |
| Lung-SCC       | 8cf9b32d-3d6f-4898-8c7a-89511b754021 | 9  | 135405266 | 135407098 | 10 | 1832  | 2  | 1  | 7  | NA | NA | NA |
| Lung-SCC       | 8cf9b32d-3d6f-4898-8c7a-89511b754021 | 11 | 109303281 | 109304559 | 7  | 1278  | 1  | 6  | NA | NA | NA | NA |
| Lung-SCC       | 8cf9b32d-3d6f-4898-8c7a-89511b754021 | 16 | 27810966  | 27812369  | 6  | 1403  | NA | 2  | 4  | NA | NA | NA |
| Lung-SCC       | 8cf9b32d-3d6f-4898-8c7a-89511b754021 | 19 | 33232531  | 33236962  | 7  | 4431  | NA | 2  | 5  | NA | NA | NA |
| Lung-SCC       | 8cf9b32d-3d6f-4898-8c7a-89511b754021 | X  | 132663894 | 132666194 | 13 | 2300  | NA | 2  | 10 | 1  | NA | NA |
| Uterus-AdenoCA | 8d4cb709-c95c-4bdc-844b-c0bfa2a3028e | 2  | 154633585 | 154636491 | 22 | 2906  | 3  | 7  | 12 | NA | NA | NA |
| Uterus-AdenoCA | 8d4cb709-c95c-4bdc-844b-c0bfa2a3028e | 8  | 61236100  | 61236389  | 7  | 289   | 3  | 2  | 2  | NA | NA | NA |
| Uterus-AdenoCA | 8d4cb709-c95c-4bdc-844b-c0bfa2a3028e | 8  | 61262434  | 61265300  | 7  | 2866  | 3  | 3  | 1  | NA | NA | NA |
| Uterus-AdenoCA | 8d4cb709-c95c-4bdc-844b-c0bfa2a3028e | 8  | 67323789  | 67331456  | 15 | 7667  | 2  | 8  | 4  | NA | NA | 1  |
| Skin-Melanoma  | 8d5ffe62-6dd9-4764-b0b7-5e3010eefe6d | 1  | 119930049 | 119938291 | 22 | 8242  | 4  | 7  | 11 | NA | NA | NA |
| Skin-Melanoma  | 8d5ffe62-6dd9-4764-b0b7-5e3010eefe6d | 1  | 120292730 | 120293428 | 10 | 698   | 3  | 3  | 4  | NA | NA | NA |
| Skin-Melanoma  | 8d5ffe62-6dd9-4764-b0b7-5e3010eefe6d | 4  | 55136157  | 55137636  | 14 | 1479  | NA | NA | 14 | NA | NA | NA |
| Skin-Melanoma  | 8d5ffe62-6dd9-4764-b0b7-5e3010eefe6d | 8  | 79661058  | 79662048  | 10 | 990   | 1  | 4  | 5  | NA | NA | NA |
| Skin-Melanoma  | 8d5ffe62-6dd9-4764-b0b7-5e3010eefe6d | 8  | 139347431 | 139353579 | 9  | 6148  | NA | NA | 9  | NA | NA | NA |
| Skin-Melanoma  | 8d5ffe62-6dd9-4764-b0b7-5e3010eefe6d | 11 | 30883529  | 30884741  | 6  | 1212  | NA | 3  | 3  | NA | NA | NA |
| Panc-AdenoCA   | 8d67c121-37d0-4fc0-a349-2c9452589d65 | 3  | 404972    | 405356    | 8  | 384   | NA | 2  | 6  | NA | NA | NA |

|                  |                                      |    |           |           |    |       |    |    |    |    |    |    |
|------------------|--------------------------------------|----|-----------|-----------|----|-------|----|----|----|----|----|----|
| Panc-AdenoCA     | 8d67c121-37d0-4fc0-a349-2c9452589d65 | 10 | 36082303  | 36083671  | 10 | 1368  | 2  | 6  | 2  | NA | NA | NA |
| Panc-AdenoCA     | 8d67c121-37d0-4fc0-a349-2c9452589d65 | 12 | 70747578  | 70751111  | 51 | 3533  | 2  | 20 | 29 | NA | NA | NA |
| Panc-AdenoCA     | 8d67c121-37d0-4fc0-a349-2c9452589d65 | Y  | 23189954  | 23191673  | 10 | 1719  | 1  | 7  | 2  | NA | NA | NA |
| Liver-HCC        | 8d7592e2-c622-11e3-bf01-24c6515278c0 | 13 | 88646024  | 88646231  | 6  | 207   | 2  | NA | 4  | NA | NA | NA |
| ColoRect-AdenoCA | 8da641e4-9b12-4163-bd1e-9d5af91e5186 | 8  | 6059659   | 6060278   | 7  | 619   | NA | 6  | 1  | NA | NA | NA |
| ColoRect-AdenoCA | 8da641e4-9b12-4163-bd1e-9d5af91e5186 | 17 | 36214364  | 36215574  | 14 | 1210  | 7  | 5  | 2  | NA | NA | NA |
| Uterus-AdenoCA   | 8dd14f0e-8601-4aa1-864c-3c49e768cdd1 | 1  | 119424139 | 119428190 | 8  | 4051  | 3  | 4  | 1  | NA | NA | NA |
| Uterus-AdenoCA   | 8dd14f0e-8601-4aa1-864c-3c49e768cdd1 | 19 | 17542320  | 17543014  | 6  | 694   | 1  | 3  | 2  | NA | NA | NA |
| Uterus-AdenoCA   | 8dd14f0e-8601-4aa1-864c-3c49e768cdd1 | X  | 55048332  | 55048738  | 7  | 406   | 1  | 5  | 1  | NA | NA | NA |
| Breast-AdenoCa   | 8e03e773-5557-4e78-889b-4710c515378f | 1  | 188084252 | 188086188 | 12 | 1936  | 5  | 7  | NA | NA | NA | NA |
| Breast-AdenoCa   | 8e03e773-5557-4e78-889b-4710c515378f | 1  | 247258545 | 247260128 | 7  | 1583  | 4  | 2  | 1  | NA | NA | NA |
| Breast-AdenoCa   | 8e03e773-5557-4e78-889b-4710c515378f | 6  | 66523626  | 66525100  | 8  | 1474  | 2  | 5  | NA | 1  | NA | NA |
| Breast-AdenoCa   | 8e03e773-5557-4e78-889b-4710c515378f | 8  | 49178936  | 49190587  | 14 | 11651 | 2  | 10 | 2  | NA | NA | NA |
| Breast-AdenoCa   | 8e03e773-5557-4e78-889b-4710c515378f | X  | 20389195  | 20394766  | 8  | 5571  | 1  | 6  | 1  | NA | NA | NA |
| Eso-AdenoCa      | 8e48aa43-6cd1-4aef-83ce-2451b1b86e8e | 17 | 54255080  | 54255625  | 7  | 545   | 1  | 2  | 4  | NA | NA | NA |
| Eso-AdenoCa      | 8e48aa43-6cd1-4aef-83ce-2451b1b86e8e | 17 | 64455394  | 64461521  | 8  | 6127  | 2  | 1  | 4  | 1  | NA | NA |
| Eso-AdenoCa      | 8e48aa43-6cd1-4aef-83ce-2451b1b86e8e | 17 | 74505638  | 74508306  | 31 | 2668  | 8  | 12 | 11 | NA | NA | NA |
| Breast-AdenoCa   | 8f558713-f32b-403b-aedf-c79efeb41c67 | 3  | 96944060  | 96949943  | 7  | 5883  | NA | NA | 1  | 1  | 5  | NA |
| Breast-AdenoCa   | 8f558713-f32b-403b-aedf-c79efeb41c67 | 3  | 118575205 | 118585055 | 12 | 9850  | 1  | 6  | 5  | NA | NA | NA |
| Breast-AdenoCa   | 8f558713-f32b-403b-aedf-c79efeb41c67 | 6  | 57657999  | 57661393  | 24 | 3394  | 7  | 15 | 2  | NA | NA | NA |
| Breast-AdenoCa   | 8f558713-f32b-403b-aedf-c79efeb41c67 | 6  | 82973651  | 82974750  | 9  | 1099  | NA | 2  | 4  | 1  | 1  | 1  |
| Breast-AdenoCa   | 8f558713-f32b-403b-aedf-c79efeb41c67 | 6  | 83645195  | 83651120  | 9  | 5925  | NA | 4  | 5  | NA | NA | NA |
| Breast-AdenoCa   | 8f558713-f32b-403b-aedf-c79efeb41c67 | 6  | 156452249 | 156454074 | 7  | 1825  | 5  | 1  | 1  | NA | NA | NA |
| Breast-AdenoCa   | 8f558713-f32b-403b-aedf-c79efeb41c67 | 17 | 36006947  | 36009920  | 6  | 2973  | NA | 1  | 5  | NA | NA | NA |
| Breast-AdenoCa   | 8f558713-f32b-403b-aedf-c79efeb41c67 | 17 | 36023956  | 36029356  | 8  | 5400  | NA | 4  | 2  | 2  | NA | NA |
| Breast-AdenoCa   | 8f558713-f32b-403b-aedf-c79efeb41c67 | 17 | 36044845  | 36046632  | 7  | 1787  | NA | 5  | 2  | NA | NA | NA |
| Breast-AdenoCa   | 8f558713-f32b-403b-aedf-c79efeb41c67 | 17 | 38979535  | 38981733  | 10 | 2198  | 1  | 4  | 5  | NA | NA | NA |
| Breast-AdenoCa   | 8f558713-f32b-403b-aedf-c79efeb41c67 | 17 | 62022565  | 62023238  | 8  | 673   | 1  | 4  | 3  | NA | NA | NA |
| Breast-AdenoCa   | 8f558713-f32b-403b-aedf-c79efeb41c67 | 19 | 47766385  | 47770745  | 6  | 4360  | 1  | NA | 5  | NA | NA | NA |
| Kidney-RCC       | 8fa0484b-5f95-4ec8-b3de-cea2e8f3c5ca | 3  | 89355239  | 89356471  | 11 | 1232  | 2  | 7  | 2  | NA | NA | NA |
| Kidney-RCC       | 8fa0484b-5f95-4ec8-b3de-cea2e8f3c5ca | 13 | 73247941  | 73255204  | 15 | 7263  | 2  | 4  | 8  | NA | NA | 1  |
| Lymph-BNHL       | 8fc11cb6-9d79-41c3-bb45-0dadda890e8d | 4  | 165501893 | 165503817 | 6  | 1924  | NA | 4  | 2  | NA | NA | NA |
| Lymph-BNHL       | 8fc11cb6-9d79-41c3-bb45-0dadda890e8d | 6  | 91005086  | 91007022  | 9  | 1936  | NA | 1  | 7  | 1  | NA | NA |
| Lymph-BNHL       | 8fc11cb6-9d79-41c3-bb45-0dadda890e8d | 9  | 37024771  | 37026554  | 7  | 1783  | NA | 3  | 4  | NA | NA | NA |
| Lymph-BNHL       | 8fc11cb6-9d79-41c3-bb45-0dadda890e8d | 14 | 106069701 | 106070132 | 6  | 431   | 1  | 3  | 2  | NA | NA | NA |
| Lymph-BNHL       | 8fc11cb6-9d79-41c3-bb45-0dadda890e8d | 14 | 106326574 | 106330109 | 61 | 3535  | 2  | 13 | 30 | 8  | 1  | 7  |
| Lymph-BNHL       | 8fc11cb6-9d79-41c3-bb45-0dadda890e8d | 14 | 106994118 | 106995145 | 25 | 1027  | 1  | 2  | 10 | 5  | 2  | 5  |
| Lymph-BNHL       | 8fc11cb6-9d79-41c3-bb45-0dadda890e8d | 18 | 60983902  | 60988401  | 44 | 4499  | 1  | 5  | 23 | 7  | 4  | 4  |
| Lymph-BNHL       | 8fc11cb6-9d79-41c3-bb45-0dadda890e8d | 22 | 22379873  | 22385843  | 34 | 5970  | 1  | 5  | 18 | 5  | 1  | 4  |
| Lymph-BNHL       | 8fc11cb6-9d79-41c3-bb45-0dadda890e8d | 22 | 23203555  | 23206118  | 14 | 2563  | NA | 1  | 7  | 1  | 1  | 4  |
| Liver-HCC        | 8fd5e62c-c622-11e3-bf01-24c6515278c0 | 1  | 118697532 | 118700068 | 7  | 2536  | 1  | 2  | 4  | NA | NA | NA |
| Liver-HCC        | 8fd5e62c-c622-11e3-bf01-24c6515278c0 | 1  | 217396849 | 217397559 | 10 | 710   | 1  | 4  | 5  | NA | NA | NA |
| Liver-HCC        | 8fd5e62c-c622-11e3-bf01-24c6515278c0 | 1  | 217716931 | 217717567 | 7  | 636   | 2  | 1  | 4  | NA | NA | NA |
| Panc-AdenoCA     | 9011cf17-0783-4f9d-b355-4f0fc1a2e78b | 1  | 60804041  | 60805380  | 12 | 1339  | 5  | 1  | 6  | NA | NA | NA |
| Panc-AdenoCA     | 9011cf17-0783-4f9d-b355-4f0fc1a2e78b | 4  | 66959568  | 66959839  | 7  | 271   | NA | NA | 7  | NA | NA | NA |
| Panc-AdenoCA     | 9011cf17-0783-4f9d-b355-4f0fc1a2e78b | 8  | 130097978 | 130099917 | 18 | 1939  | 2  | 3  | 13 | NA | NA | NA |
| Panc-AdenoCA     | 9011cf17-0783-4f9d-b355-4f0fc1a2e78b | 19 | 21508382  | 21508758  | 6  | 376   | 2  | 2  | 2  | NA | NA | NA |
| Panc-AdenoCA     | 9011cf17-0783-4f9d-b355-4f0fc1a2e78b | 19 | 38827988  | 38828576  | 10 | 588   | 2  | 3  | 5  | NA | NA | NA |
| Panc-AdenoCA     | 9011cf17-0783-4f9d-b355-4f0fc1a2e78b | 19 | 56497161  | 56498567  | 12 | 1406  | 1  | 4  | 7  | NA | NA | NA |
| Ovary-AdenoCA    | 9020b6a5-8325-4b0d-84d9-04371c857910 | 4  | 128297966 | 128302525 | 7  | 4559  | 2  | 4  | 1  | NA | NA | NA |
| Ovary-AdenoCA    | 9020b6a5-8325-4b0d-84d9-04371c857910 | 6  | 64443606  | 64445293  | 11 | 1687  | 1  | 8  | 2  | NA | NA | NA |
| Ovary-AdenoCA    | 9020b6a5-8325-4b0d-84d9-04371c857910 | 6  | 68664966  | 68670835  | 11 | 5869  | 3  | 5  | 3  | NA | NA | NA |
| Ovary-AdenoCA    | 9020b6a5-8325-4b0d-84d9-04371c857910 | 6  | 100737406 | 100737745 | 7  | 339   | 1  | 2  | 4  | NA | NA | NA |
| Ovary-AdenoCA    | 9020b6a5-8325-4b0d-84d9-04371c857910 | 11 | 45060616  | 45061241  | 6  | 625   | NA | 4  | 2  | NA | NA | NA |
| Ovary-AdenoCA    | 9020b6a5-8325-4b0d-84d9-04371c857910 | 19 | 30050621  | 30057859  | 19 | 7238  | 3  | 13 | 2  | NA | NA | 1  |
| Ovary-AdenoCA    | 9020b6a5-8325-4b0d-84d9-04371c857910 | 19 | 43623264  | 43628284  | 19 | 5020  | 2  | 10 | 6  | NA | NA | 1  |
| Breast-AdenoCa   | 9032b7fe-e38a-4641-a45e-67041668adc4 | 1  | 246035567 | 246039320 | 8  | 3753  | 1  | 4  | 2  | NA | NA | 1  |
| Breast-AdenoCa   | 9032b7fe-e38a-4641-a45e-67041668adc4 | 8  | 82593212  | 82596137  | 8  | 2925  | 1  | 6  | 1  | NA | NA | NA |
| Panc-AdenoCA     | 9078333d-73d3-496a-9fc3-a94353b7e107 | 3  | 99719779  | 99724832  | 14 | 5053  | 1  | 6  | 7  | NA | NA | NA |
| Panc-AdenoCA     | 9078333d-73d3-496a-9fc3-a94353b7e107 | 4  | 187415192 | 187415871 | 6  | 679   | 2  | 3  | 1  | NA | NA | NA |

|               |                                      |    |           |           |     |       |    |    |    |    |    |    |
|---------------|--------------------------------------|----|-----------|-----------|-----|-------|----|----|----|----|----|----|
| Panc-AdenoCA  | 9078333d-73d3-496a-9fc3-a94353b7e107 | 13 | 20141771  | 20144169  | 8   | 2398  | 3  | 3  | 2  | NA | NA | NA |
| Panc-AdenoCA  | 9078333d-73d3-496a-9fc3-a94353b7e107 | 18 | 61348598  | 61350027  | 7   | 1429  | 1  | 3  | 3  | NA | NA | NA |
| Panc-AdenoCA  | 90b3c237-29a4-48b3-90b3-9f2c0ccb5928 | 4  | 155426795 | 155429785 | 8   | 2990  | NA | 5  | 3  | NA | NA | NA |
| Panc-AdenoCA  | 90b3c237-29a4-48b3-90b3-9f2c0ccb5928 | 6  | 42968513  | 42968663  | 6   | 150   | 2  | 1  | 3  | NA | NA | NA |
| Panc-AdenoCA  | 90b3c237-29a4-48b3-90b3-9f2c0ccb5928 | 8  | 121679876 | 121683397 | 16  | 3521  | 3  | 5  | 7  | NA | NA | 1  |
| CNS-GBM       | 914421d2-898e-433e-bb66-b1710eaae2c7 | 2  | 225954505 | 225956388 | 6   | 1883  | 1  | 5  | NA | NA | NA | NA |
| Lymph-CLL     | 915cbb43-9e00-433d-818f-531011bea57e | 3  | 187461951 | 187463096 | 8   | 1145  | NA | 1  | 2  | 3  | NA | 2  |
| Lymph-CLL     | 915cbb43-9e00-433d-818f-531011bea57e | 14 | 106324858 | 106329814 | 97  | 4956  | 5  | 26 | 21 | 22 | 11 | 12 |
| Lymph-CLL     | 915cbb43-9e00-433d-818f-531011bea57e | 14 | 106815249 | 106816606 | 11  | 1357  | NA | NA | 4  | 2  | 2  | 3  |
| Lymph-CLL     | 915cbb43-9e00-433d-818f-531011bea57e | 22 | 22516384  | 22517024  | 13  | 640   | 1  | 2  | 6  | 2  | 1  | 1  |
| Lymph-CLL     | 915cbb43-9e00-433d-818f-531011bea57e | 22 | 23028166  | 23029460  | 10  | 1294  | 2  | 1  | 3  | 3  | 1  | NA |
| Lymph-CLL     | 915cbb43-9e00-433d-818f-531011bea57e | 22 | 23242159  | 23248364  | 9   | 6205  | 1  | 4  | 2  | NA | 1  | 1  |
| Bladder-TCC   | 91f458e6-64b7-454d-a542-b0aa23638fd8 | 1  | 55043466  | 55044255  | 6   | 789   | NA | 3  | 3  | NA | NA | NA |
| Bladder-TCC   | 91f458e6-64b7-454d-a542-b0aa23638fd8 | 4  | 74848987  | 74852625  | 15  | 3638  | 1  | 8  | 6  | NA | NA | NA |
| Bladder-TCC   | 91f458e6-64b7-454d-a542-b0aa23638fd8 | 5  | 62286417  | 62287079  | 10  | 662   | NA | 8  | 2  | NA | NA | NA |
| Bladder-TCC   | 91f458e6-64b7-454d-a542-b0aa23638fd8 | 7  | 8260975   | 8264024   | 14  | 3049  | 5  | 3  | 6  | NA | NA | NA |
| Bladder-TCC   | 91f458e6-64b7-454d-a542-b0aa23638fd8 | 8  | 72028945  | 72029613  | 10  | 668   | NA | 1  | 9  | NA | NA | NA |
| Bladder-TCC   | 91f458e6-64b7-454d-a542-b0aa23638fd8 | 8  | 100439696 | 100445288 | 15  | 5592  | 3  | 5  | 6  | NA | 1  | NA |
| Bladder-TCC   | 91f458e6-64b7-454d-a542-b0aa23638fd8 | 10 | 114836938 | 114838608 | 7   | 1670  | NA | 6  | 1  | NA | NA | NA |
| Bladder-TCC   | 91f458e6-64b7-454d-a542-b0aa23638fd8 | 10 | 134017912 | 134021280 | 13  | 3368  | 4  | 6  | 3  | NA | NA | NA |
| Bladder-TCC   | 91f458e6-64b7-454d-a542-b0aa23638fd8 | 12 | 72674197  | 72685999  | 15  | 11802 | 3  | 4  | 7  | NA | NA | 1  |
| Bladder-TCC   | 91f458e6-64b7-454d-a542-b0aa23638fd8 | 12 | 96007084  | 96009136  | 8   | 2052  | NA | 3  | 5  | NA | NA | NA |
| Bladder-TCC   | 91f458e6-64b7-454d-a542-b0aa23638fd8 | 12 | 109471226 | 109471701 | 9   | 475   | NA | NA | 9  | NA | NA | NA |
| Bladder-TCC   | 91f458e6-64b7-454d-a542-b0aa23638fd8 | 13 | 27326020  | 27328057  | 8   | 2037  | 1  | 5  | 2  | NA | NA | NA |
| Bladder-TCC   | 91f458e6-64b7-454d-a542-b0aa23638fd8 | 19 | 29830589  | 29835374  | 7   | 4785  | NA | 6  | 1  | NA | NA | NA |
| Bladder-TCC   | 91f458e6-64b7-454d-a542-b0aa23638fd8 | 19 | 39877398  | 39877732  | 7   | 334   | NA | 2  | 5  | NA | NA | NA |
| Eso-AdenoCa   | 9258860c-a336-4075-996d-2ee0c18b281c | 7  | 38479266  | 38482647  | 6   | 3381  | NA | NA | NA | 2  | 4  | NA |
| Lymph-BNHL    | 929f2216-6ab3-414f-a814-49b69d4b49d9 | 2  | 89159309  | 89159918  | 19  | 609   | NA | 5  | 3  | 6  | 2  | 3  |
| Lymph-BNHL    | 929f2216-6ab3-414f-a814-49b69d4b49d9 | 2  | 90196442  | 90198141  | 10  | 1699  | NA | 1  | 6  | 2  | 1  | NA |
| Lymph-BNHL    | 929f2216-6ab3-414f-a814-49b69d4b49d9 | 4  | 76816994  | 76820719  | 17  | 3725  | NA | 8  | 9  | NA | NA | NA |
| Lymph-BNHL    | 929f2216-6ab3-414f-a814-49b69d4b49d9 | 4  | 161772811 | 161779015 | 9   | 6204  | 4  | 3  | 2  | NA | NA | NA |
| Lymph-BNHL    | 929f2216-6ab3-414f-a814-49b69d4b49d9 | 6  | 37138248  | 37141276  | 13  | 3028  | 1  | 2  | 10 | NA | NA | NA |
| Lymph-BNHL    | 929f2216-6ab3-414f-a814-49b69d4b49d9 | 8  | 2508071   | 2508261   | 6   | 190   | NA | NA | NA | 3  | 1  | 2  |
| Lymph-BNHL    | 929f2216-6ab3-414f-a814-49b69d4b49d9 | 14 | 106109956 | 106114481 | 29  | 4525  | 1  | 7  | 21 | NA | NA | NA |
| Lymph-BNHL    | 929f2216-6ab3-414f-a814-49b69d4b49d9 | 14 | 106176244 | 106177345 | 8   | 1101  | NA | 3  | 5  | NA | NA | NA |
| Lymph-BNHL    | 929f2216-6ab3-414f-a814-49b69d4b49d9 | 14 | 106208351 | 106214160 | 14  | 5809  | 1  | 1  | 12 | NA | NA | NA |
| Lymph-BNHL    | 929f2216-6ab3-414f-a814-49b69d4b49d9 | 14 | 106236883 | 106241546 | 50  | 4663  | 3  | 14 | 33 | NA | NA | NA |
| Lymph-BNHL    | 929f2216-6ab3-414f-a814-49b69d4b49d9 | 14 | 106322585 | 106357997 | 153 | 35412 | 13 | 23 | 55 | 36 | 5  | 21 |
| Lymph-BNHL    | 929f2216-6ab3-414f-a814-49b69d4b49d9 | 14 | 106829834 | 106830575 | 26  | 741   | 3  | 3  | 8  | 5  | 3  | 4  |
| Lymph-BNHL    | 929f2216-6ab3-414f-a814-49b69d4b49d9 | 22 | 22758730  | 22764542  | 16  | 5812  | NA | 5  | 6  | 2  | 1  | 2  |
| Lymph-BNHL    | 929f2216-6ab3-414f-a814-49b69d4b49d9 | 22 | 23036792  | 23040701  | 11  | 3909  | NA | 2  | 8  | NA | 1  | NA |
| Lymph-BNHL    | 929f2216-6ab3-414f-a814-49b69d4b49d9 | 22 | 23236216  | 23248761  | 25  | 12545 | 2  | 8  | 9  | 4  | 1  | 1  |
| Panc-AdenoCA  | 92dc0e0c-842f-40de-9c39-486b491ea80a | 11 | 94529638  | 94537904  | 23  | 8266  | 2  | 10 | 11 | NA | NA | NA |
| Panc-AdenoCA  | 92dc0e0c-842f-40de-9c39-486b491ea80a | 11 | 109515187 | 109522107 | 18  | 6920  | 5  | 7  | 6  | NA | NA | NA |
| Panc-AdenoCA  | 92dc0e0c-842f-40de-9c39-486b491ea80a | 16 | 33876795  | 33879145  | 15  | 2350  | 4  | 6  | 5  | NA | NA | NA |
| Liver-HCC     | 9321341c-c622-11e3-bf01-24c6515278c0 | 3  | 173042037 | 173046800 | 7   | 4763  | 1  | 2  | 3  | 1  | NA | NA |
| Liver-HCC     | 93a49462-4bd3-4efa-87a5-69006abba5a0 | 4  | 80119500  | 80124647  | 19  | 5147  | 2  | 7  | 8  | 2  | NA | NA |
| Liver-HCC     | 93a49462-4bd3-4efa-87a5-69006abba5a0 | 11 | 57657349  | 57658917  | 11  | 1568  | NA | 5  | 5  | NA | 1  | NA |
| Liver-HCC     | 93a49462-4bd3-4efa-87a5-69006abba5a0 | 17 | 28751007  | 28753729  | 12  | 2722  | NA | 3  | 8  | NA | 1  | NA |
| Ovary-AdenoCA | 941fcb56-e059-403d-aab1-0692a3ecc45e | 19 | 19214480  | 19214804  | 6   | 324   | 3  | 2  | 1  | NA | NA | NA |
| Ovary-AdenoCA | 941fcb56-e059-403d-aab1-0692a3ecc45e | 19 | 23569742  | 23570440  | 9   | 698   | NA | 3  | 6  | NA | NA | NA |
| Ovary-AdenoCA | 941fcb56-e059-403d-aab1-0692a3ecc45e | 19 | 30014038  | 30015680  | 10  | 1642  | NA | 4  | 6  | NA | NA | NA |
| Ovary-AdenoCA | 941fcb56-e059-403d-aab1-0692a3ecc45e | 19 | 42723424  | 42724059  | 7   | 635   | NA | 4  | 3  | NA | NA | NA |
| Ovary-AdenoCA | 941fcb56-e059-403d-aab1-0692a3ecc45e | 19 | 45627649  | 45628300  | 11  | 651   | NA | 5  | 6  | NA | NA | NA |
| Ovary-AdenoCA | 941fcb56-e059-403d-aab1-0692a3ecc45e | 22 | 22715761  | 22715935  | 9   | 174   | NA | NA | NA | 9  | NA | NA |
| Liver-HCC     | 94431626-c622-11e3-bf01-24c6515278c0 | 6  | 57170514  | 57171592  | 6   | 1078  | NA | NA | NA | NA | 3  | 3  |
| Liver-HCC     | 94431626-c622-11e3-bf01-24c6515278c0 | 17 | 18618148  | 18619217  | 6   | 1069  | NA | NA | NA | 1  | 2  | 3  |
| Panc-AdenoCA  | 94652d14-2e4d-4f4a-a4f7-8df77df788c0 | 9  | 104807703 | 104811103 | 26  | 3400  | 5  | 7  | 13 | 1  | NA | NA |
| Panc-AdenoCA  | 94652d14-2e4d-4f4a-a4f7-8df77df788c0 | 9  | 122827360 | 122827711 | 11  | 351   | NA | 4  | 7  | NA | NA | NA |
| Panc-AdenoCA  | 94652d14-2e4d-4f4a-a4f7-8df77df788c0 | 19 | 38951860  | 38954475  | 9   | 2615  | 1  | 4  | 4  | NA | NA | NA |



|                 |                                      |    |           |           |    |       |    |    |    |    |    |    |
|-----------------|--------------------------------------|----|-----------|-----------|----|-------|----|----|----|----|----|----|
| Panc-AdenoCA    | 94652d14-2e4d-4f4a-a4f7-8df77df788c0 | 19 | 39967546  | 39973129  | 12 | 5583  | 3  | 1  | 7  | 1  | NA | NA |
| Panc-AdenoCA    | 94652d14-2e4d-4f4a-a4f7-8df77df788c0 | 19 | 49846181  | 49851860  | 27 | 5679  | 1  | NA | 26 | NA | NA | NA |
| Panc-AdenoCA    | 94652d14-2e4d-4f4a-a4f7-8df77df788c0 | X  | 85412699  | 85417111  | 23 | 4412  | NA | 9  | 14 | NA | NA | NA |
| Stomach-AdenoCA | 9536f736-63bc-4099-bd54-740f5910f4a8 | 11 | 111523798 | 111528006 | 7  | 4208  | 3  | 1  | 2  | NA | NA | 1  |
| Stomach-AdenoCA | 9536f736-63bc-4099-bd54-740f5910f4a8 | 17 | 31068484  | 31068664  | 8  | 180   | 1  | 4  | 3  | NA | NA | NA |
| Panc-AdenoCA    | 95cc9620-7686-4805-a96c-cf8e659847c3 | 3  | 95033030  | 95038627  | 15 | 5597  | NA | NA | NA | 3  | 5  | 7  |
| Panc-AdenoCA    | 95cc9620-7686-4805-a96c-cf8e659847c3 | 5  | 45605635  | 45618938  | 26 | 13303 | NA | NA | NA | 12 | 9  | 5  |
| Ovary-AdenoCA   | 95fc38ac-2b36-4c46-abbf-8d2d52ff9626 | 12 | 21750946  | 21752450  | 8  | 1504  | 1  | 3  | 4  | NA | NA | NA |
| Liver-HCC       | 96abdbc8-c622-11e3-bf01-24c6515278c0 | 1  | 222004239 | 222011215 | 32 | 6976  | 2  | 15 | 14 | 1  | NA | NA |
| Liver-HCC       | 96abdbc8-c622-11e3-bf01-24c6515278c0 | 15 | 24764608  | 24768535  | 16 | 3927  | 3  | 10 | 3  | NA | NA | NA |
| Panc-AdenoCA    | 96ba50eb-3c12-41ad-ac7b-d23b2001fe44 | 6  | 62600669  | 62601591  | 8  | 922   | 1  | 2  | 4  | NA | NA | 1  |
| Panc-AdenoCA    | 96ba50eb-3c12-41ad-ac7b-d23b2001fe44 | X  | 5423923   | 5424435   | 6  | 512   | 1  | 3  | 2  | NA | NA | NA |
| Panc-AdenoCA    | 96cca60e-17dc-44c3-90f7-1b57b0e08e5f | 11 | 24820193  | 24822898  | 8  | 2705  | 1  | 1  | 5  | NA | NA | 1  |
| Panc-AdenoCA    | 96cca60e-17dc-44c3-90f7-1b57b0e08e5f | 11 | 29852632  | 29854752  | 15 | 2120  | 2  | 7  | 6  | NA | NA | NA |
| CNS-GBM         | 96e3db14-2bb1-4f68-aed6-5e794750c96e | 3  | 3155326   | 3164352   | 15 | 9026  | NA | 7  | 8  | NA | NA | NA |
| CNS-GBM         | 96e3db14-2bb1-4f68-aed6-5e794750c96e | 6  | 163163836 | 163168151 | 10 | 4315  | 2  | 4  | 3  | 1  | NA | NA |
| Uterus-AdenoCA  | 96f337d2-ccc4-4484-87cd-ab2109d2bf50 | 6  | 31778403  | 31778448  | 7  | 45    | 3  | NA | 2  | NA | 2  | NA |
| Breast-AdenoCa  | 97064332-1d4f-4571-93ff-354ffe6d7df9 | 8  | 127655363 | 127657916 | 14 | 2553  | 3  | 8  | 3  | NA | NA | NA |
| Breast-AdenoCa  | 97064332-1d4f-4571-93ff-354ffe6d7df9 | 8  | 146008861 | 146010751 | 12 | 1890  | 2  | 8  | 2  | NA | NA | NA |
| Bladder-TCC     | 973d0577-8ca4-44a1-817f-1d3c1bada151 | 2  | 56234009  | 56237379  | 6  | 3370  | NA | 2  | 4  | NA | NA | NA |
| Bladder-TCC     | 973d0577-8ca4-44a1-817f-1d3c1bada151 | 8  | 89361516  | 89364498  | 6  | 2982  | 2  | 1  | 3  | NA | NA | NA |
| Bladder-TCC     | 973d0577-8ca4-44a1-817f-1d3c1bada151 | 8  | 89844698  | 89850348  | 10 | 5650  | 1  | 7  | 2  | NA | NA | NA |
| Bladder-TCC     | 973d0577-8ca4-44a1-817f-1d3c1bada151 | 9  | 101141617 | 101144027 | 6  | 2410  | 1  | 2  | 3  | NA | NA | NA |
| Bladder-TCC     | 973d0577-8ca4-44a1-817f-1d3c1bada151 | 14 | 52007601  | 52011136  | 6  | 3535  | 1  | 3  | 2  | NA | NA | NA |
| Eso-AdenoCa     | 9749a9a5-cb7f-4038-a5f9-5e2d6b97c689 | 1  | 242731435 | 242731724 | 6  | 289   | 2  | 2  | 2  | NA | NA | NA |
| Eso-AdenoCa     | 9749a9a5-cb7f-4038-a5f9-5e2d6b97c689 | 13 | 39689708  | 39690320  | 6  | 612   | 1  | 4  | 1  | NA | NA | NA |
| Eso-AdenoCa     | 9749a9a5-cb7f-4038-a5f9-5e2d6b97c689 | 13 | 41891318  | 41893891  | 8  | 2573  | 1  | 2  | 5  | NA | NA | NA |
| Panc-AdenoCA    | 97c46ede-b280-4344-8dbb-e860c6472239 | 4  | 175811784 | 175812915 | 7  | 1131  | NA | 2  | 5  | NA | NA | NA |
| Panc-AdenoCA    | 97c46ede-b280-4344-8dbb-e860c6472239 | 7  | 63446892  | 63450352  | 6  | 3460  | NA | 3  | 3  | NA | NA | NA |
| Panc-AdenoCA    | 97c46ede-b280-4344-8dbb-e860c6472239 | 10 | 1864019   | 1865152   | 13 | 1133  | 1  | 6  | 5  | 1  | NA | NA |
| Panc-AdenoCA    | 97c46ede-b280-4344-8dbb-e860c6472239 | 12 | 44616160  | 44616510  | 6  | 350   | NA | NA | 6  | NA | NA | NA |
| Panc-AdenoCA    | 97c46ede-b280-4344-8dbb-e860c6472239 | 16 | 60983336  | 60993272  | 15 | 9936  | 1  | 5  | 9  | NA | NA | NA |
| Panc-AdenoCA    | 97c46ede-b280-4344-8dbb-e860c6472239 | 17 | 34235624  | 34236865  | 10 | 1241  | 2  | 2  | 6  | NA | NA | NA |
| Prost-AdenoCA   | 982b58ca-02b3-4e7d-8af0-4b133d0c7e50 | X  | 126161935 | 126162497 | 6  | 562   | NA | NA | NA | 1  | 5  | NA |
| Biliary-AdenoCA | 983c14b8-f35b-497b-9fd4-5e5f5f0a7aa7 | 1  | 236868065 | 236869688 | 16 | 1623  | NA | 2  | 14 | NA | NA | NA |
| Biliary-AdenoCA | 983c14b8-f35b-497b-9fd4-5e5f5f0a7aa7 | 12 | 26225868  | 26228551  | 6  | 2683  | 1  | NA | 4  | NA | NA | 1  |
| Biliary-AdenoCA | 983c14b8-f35b-497b-9fd4-5e5f5f0a7aa7 | 12 | 26265278  | 26265855  | 9  | 577   | 1  | 5  | 3  | NA | NA | NA |
| Biliary-AdenoCA | 983c14b8-f35b-497b-9fd4-5e5f5f0a7aa7 | 12 | 27453955  | 27461841  | 9  | 7886  | NA | 2  | 6  | NA | NA | 1  |
| Biliary-AdenoCA | 983c14b8-f35b-497b-9fd4-5e5f5f0a7aa7 | 22 | 39184231  | 39187555  | 15 | 3324  | 3  | 6  | 6  | NA | NA | NA |
| Biliary-AdenoCA | 983c14b8-f35b-497b-9fd4-5e5f5f0a7aa7 | 22 | 48620867  | 48628560  | 15 | 7693  | 3  | 6  | 6  | NA | NA | NA |
| Breast-AdenoCa  | 987528ac-437a-4eb8-a335-4f2076d5c006 | 2  | 208990076 | 208995539 | 23 | 5463  | 8  | 9  | 6  | NA | NA | NA |
| Breast-AdenoCa  | 987528ac-437a-4eb8-a335-4f2076d5c006 | 2  | 209563998 | 209566722 | 30 | 2724  | 10 | 14 | 6  | NA | NA | NA |
| Breast-AdenoCa  | 987528ac-437a-4eb8-a335-4f2076d5c006 | 6  | 111220040 | 111220539 | 6  | 499   | 2  | 4  | NA | NA | NA | NA |
| Breast-AdenoCa  | 987528ac-437a-4eb8-a335-4f2076d5c006 | 6  | 112140598 | 112141817 | 15 | 1219  | 3  | 8  | 3  | 1  | NA | NA |
| Breast-AdenoCa  | 987528ac-437a-4eb8-a335-4f2076d5c006 | 6  | 161661239 | 161661759 | 7  | 520   | 3  | 2  | 2  | NA | NA | NA |
| Breast-AdenoCa  | 987528ac-437a-4eb8-a335-4f2076d5c006 | 7  | 82117417  | 82117425  | 6  | 8     | 2  | NA | 1  | 3  | NA | NA |
| Breast-AdenoCa  | 987528ac-437a-4eb8-a335-4f2076d5c006 | 7  | 111252492 | 111254587 | 9  | 2095  | 2  | 3  | 4  | NA | NA | NA |
| Breast-AdenoCa  | 987528ac-437a-4eb8-a335-4f2076d5c006 | 9  | 71515957  | 71519082  | 11 | 3125  | 2  | 1  | 7  | NA | NA | 1  |
| Breast-AdenoCa  | 987528ac-437a-4eb8-a335-4f2076d5c006 | 18 | 866634    | 867125    | 19 | 491   | 2  | 4  | 13 | NA | NA | NA |
| Breast-AdenoCa  | 987d41ee-6bab-490c-b0f2-bf28c0089de9 | 4  | 175955478 | 175955569 | 6  | 91    | NA | NA | 6  | NA | NA | NA |
| Breast-AdenoCa  | 987d41ee-6bab-490c-b0f2-bf28c0089de9 | 4  | 179915732 | 179920840 | 13 | 5108  | 1  | 1  | 11 | NA | NA | NA |
| Breast-AdenoCa  | 987d41ee-6bab-490c-b0f2-bf28c0089de9 | 4  | 180012741 | 180029254 | 19 | 16513 | NA | 4  | 15 | NA | NA | NA |
| Breast-AdenoCa  | 987d41ee-6bab-490c-b0f2-bf28c0089de9 | 4  | 183125765 | 183129415 | 7  | 3650  | NA | NA | 6  | NA | NA | 1  |
| Breast-AdenoCa  | 987d41ee-6bab-490c-b0f2-bf28c0089de9 | 4  | 188900711 | 188904784 | 12 | 4073  | NA | 3  | 9  | NA | NA | NA |
| Breast-AdenoCa  | 987d41ee-6bab-490c-b0f2-bf28c0089de9 | 4  | 190659858 | 190661714 | 9  | 1856  | 1  | 2  | 6  | NA | NA | NA |
| Breast-AdenoCa  | 987d41ee-6bab-490c-b0f2-bf28c0089de9 | 6  | 87468665  | 87469061  | 7  | 396   | NA | 5  | 2  | NA | NA | NA |
| Breast-AdenoCa  | 987d41ee-6bab-490c-b0f2-bf28c0089de9 | 11 | 20397483  | 20401441  | 7  | 3958  | NA | 2  | 4  | NA | NA | 1  |
| Breast-AdenoCa  | 987d41ee-6bab-490c-b0f2-bf28c0089de9 | 11 | 102403912 | 102408617 | 7  | 4705  | NA | NA | 2  | 1  | 4  | NA |
| Breast-AdenoCa  | 987d41ee-6bab-490c-b0f2-bf28c0089de9 | 17 | 33456560  | 33461354  | 6  | 4794  | NA | NA | 5  | NA | 1  | NA |
| Breast-AdenoCa  | 987d41ee-6bab-490c-b0f2-bf28c0089de9 | 17 | 47575827  | 47576908  | 7  | 1081  | NA | NA | 7  | NA | NA | NA |

|                |                                      |    |           |           |     |       |    |    |    |    |    |    |
|----------------|--------------------------------------|----|-----------|-----------|-----|-------|----|----|----|----|----|----|
| Breast-AdenoCa | 987d41ee-6bab-490c-b0f2-bf28c0089de9 | 17 | 50080974  | 50096345  | 17  | 15371 | 3  | 9  | 2  | 1  | 2  | NA |
| Breast-AdenoCa | 987d41ee-6bab-490c-b0f2-bf28c0089de9 | 17 | 55685086  | 55686253  | 8   | 1167  | NA | NA | 8  | NA | NA | NA |
| Breast-AdenoCa | 987d41ee-6bab-490c-b0f2-bf28c0089de9 | X  | 53560335  | 53562391  | 6   | 2056  | NA | 4  | 2  | NA | NA | NA |
| CNS-GBM        | 9880c3c9-5685-42a7-8fe9-7585ea1a1d37 | 7  | 55347445  | 55351873  | 13  | 4428  | 1  | 9  | 3  | NA | NA | NA |
| CNS-GBM        | 9880c3c9-5685-42a7-8fe9-7585ea1a1d37 | 9  | 21134273  | 21134882  | 7   | 609   | NA | 6  | 1  | NA | NA | NA |
| CNS-GBM        | 9880c3c9-5685-42a7-8fe9-7585ea1a1d37 | 9  | 22370441  | 22373180  | 8   | 2739  | 3  | 4  | 1  | NA | NA | NA |
| Liver-HCC      | 992d9566-b1da-421a-bf36-d23382b115fa | 2  | 117001767 | 117002675 | 8   | 908   | 1  | 6  | 1  | NA | NA | NA |
| Liver-HCC      | 992d9566-b1da-421a-bf36-d23382b115fa | 5  | 121720588 | 121721068 | 7   | 480   | NA | NA | NA | 1  | 5  | 1  |
| Lymph-BNHL     | 995a1ad2-faca-4a37-a59d-e62455985afb | 1  | 167598375 | 167601569 | 23  | 3194  | 1  | 1  | 20 | 1  | NA | NA |
| Lymph-BNHL     | 995a1ad2-faca-4a37-a59d-e62455985afb | 1  | 198608734 | 198610282 | 9   | 1548  | NA | NA | 5  | 1  | 2  | 1  |
| Lymph-BNHL     | 995a1ad2-faca-4a37-a59d-e62455985afb | 1  | 203273976 | 203277147 | 69  | 3171  | 9  | 12 | 36 | 3  | 3  | 6  |
| Lymph-BNHL     | 995a1ad2-faca-4a37-a59d-e62455985afb | 1  | 226924001 | 226926383 | 14  | 2382  | 1  | 2  | 10 | 1  | NA | NA |
| Lymph-BNHL     | 995a1ad2-faca-4a37-a59d-e62455985afb | 2  | 89154339  | 89292013  | 203 | 1E+05 | 12 | 23 | 73 | 34 | 28 | 33 |
| Lymph-BNHL     | 995a1ad2-faca-4a37-a59d-e62455985afb | 2  | 96809448  | 96810938  | 9   | 1490  | 2  | NA | 7  | NA | NA | NA |
| Lymph-BNHL     | 995a1ad2-faca-4a37-a59d-e62455985afb | 2  | 100757259 | 100758558 | 9   | 1299  | NA | 2  | 6  | NA | NA | 1  |
| Lymph-BNHL     | 995a1ad2-faca-4a37-a59d-e62455985afb | 2  | 136874448 | 136875082 | 8   | 634   | 1  | 2  | 4  | 1  | NA | NA |
| Lymph-BNHL     | 995a1ad2-faca-4a37-a59d-e62455985afb | 3  | 16552195  | 16556188  | 9   | 3993  | 1  | 2  | 5  | 1  | NA | NA |
| Lymph-BNHL     | 995a1ad2-faca-4a37-a59d-e62455985afb | 3  | 186739852 | 186742823 | 11  | 2971  | NA | 2  | 8  | NA | NA | 1  |
| Lymph-BNHL     | 995a1ad2-faca-4a37-a59d-e62455985afb | 3  | 187456599 | 187468656 | 50  | 12057 | 4  | 10 | 26 | 4  | 3  | 3  |
| Lymph-BNHL     | 995a1ad2-faca-4a37-a59d-e62455985afb | 4  | 50412     | 59830     | 12  | 9418  | NA | 5  | 5  | NA | 1  | 1  |
| Lymph-BNHL     | 995a1ad2-faca-4a37-a59d-e62455985afb | 4  | 25861946  | 25865972  | 7   | 4026  | NA | 2  | 5  | NA | NA | NA |
| Lymph-BNHL     | 995a1ad2-faca-4a37-a59d-e62455985afb | 4  | 40194144  | 40256378  | 74  | 62234 | 5  | 15 | 43 | 2  | 4  | 5  |
| Lymph-BNHL     | 995a1ad2-faca-4a37-a59d-e62455985afb | 4  | 74483816  | 74485567  | 9   | 1751  | NA | 3  | 4  | 1  | 1  | NA |
| Lymph-BNHL     | 995a1ad2-faca-4a37-a59d-e62455985afb | 5  | 131824809 | 131826141 | 18  | 1332  | NA | 3  | 15 | NA | NA | NA |
| Lymph-BNHL     | 995a1ad2-faca-4a37-a59d-e62455985afb | 5  | 149785911 | 149792128 | 20  | 6217  | 1  | 5  | 10 | 1  | 2  | 1  |
| Lymph-BNHL     | 995a1ad2-faca-4a37-a59d-e62455985afb | 5  | 158524101 | 158529446 | 31  | 5345  | 1  | 2  | 25 | 1  | NA | 2  |
| Lymph-BNHL     | 995a1ad2-faca-4a37-a59d-e62455985afb | 6  | 26123678  | 26129062  | 8   | 5384  | NA | 1  | 7  | NA | NA | NA |
| Lymph-BNHL     | 995a1ad2-faca-4a37-a59d-e62455985afb | 6  | 26156807  | 26158768  | 8   | 1961  | NA | 2  | 5  | NA | 1  | NA |
| Lymph-BNHL     | 995a1ad2-faca-4a37-a59d-e62455985afb | 6  | 37138279  | 37140056  | 15  | 1777  | 3  | 3  | 9  | NA | NA | NA |
| Lymph-BNHL     | 995a1ad2-faca-4a37-a59d-e62455985afb | 6  | 134489585 | 134497632 | 20  | 8047  | 1  | 6  | 11 | 1  | 1  | NA |
| Lymph-BNHL     | 995a1ad2-faca-4a37-a59d-e62455985afb | 6  | 150954522 | 150956939 | 8   | 2417  | NA | 1  | 7  | NA | NA | NA |
| Lymph-BNHL     | 995a1ad2-faca-4a37-a59d-e62455985afb | 6  | 159464876 | 159465556 | 8   | 680   | 3  | NA | NA | 2  | 1  | 2  |
| Lymph-BNHL     | 995a1ad2-faca-4a37-a59d-e62455985afb | 9  | 37024170  | 37073126  | 50  | 48956 | 4  | 11 | 32 | 1  | 2  | NA |
| Lymph-BNHL     | 995a1ad2-faca-4a37-a59d-e62455985afb | 9  | 37381027  | 37399812  | 23  | 18785 | 2  | 4  | 15 | 1  | 1  | NA |
| Lymph-BNHL     | 995a1ad2-faca-4a37-a59d-e62455985afb | 9  | 85767460  | 85772818  | 7   | 5358  | 1  | NA | 2  | 1  | 1  | 2  |
| Lymph-BNHL     | 995a1ad2-faca-4a37-a59d-e62455985afb | 11 | 65190367  | 65191293  | 8   | 926   | 1  | 2  | 5  | NA | NA | NA |
| Lymph-BNHL     | 995a1ad2-faca-4a37-a59d-e62455985afb | 11 | 102188540 | 102201588 | 16  | 13048 | 1  | 2  | 5  | 2  | 2  | 4  |
| Lymph-BNHL     | 995a1ad2-faca-4a37-a59d-e62455985afb | 11 | 111249111 | 111249675 | 8   | 564   | NA | 1  | 7  | NA | NA | NA |
| Lymph-BNHL     | 995a1ad2-faca-4a37-a59d-e62455985afb | 11 | 128386509 | 128399300 | 32  | 12791 | NA | 8  | 21 | NA | 2  | 1  |
| Lymph-BNHL     | 995a1ad2-faca-4a37-a59d-e62455985afb | 12 | 8762169   | 8764545   | 10  | 2376  | 2  | 1  | 5  | 1  | 1  | NA |
| Lymph-BNHL     | 995a1ad2-faca-4a37-a59d-e62455985afb | 12 | 92537402  | 92539572  | 22  | 2170  | NA | 4  | 14 | 1  | 2  | 1  |
| Lymph-BNHL     | 995a1ad2-faca-4a37-a59d-e62455985afb | 12 | 113493230 | 113536315 | 77  | 43085 | 8  | 7  | 50 | 7  | 2  | 3  |
| Lymph-BNHL     | 995a1ad2-faca-4a37-a59d-e62455985afb | 12 | 122459181 | 122463599 | 22  | 4418  | 2  | 5  | 14 | NA | 1  | NA |
| Lymph-BNHL     | 995a1ad2-faca-4a37-a59d-e62455985afb | 13 | 46958832  | 46962778  | 7   | 3946  | 1  | 2  | 2  | 1  | NA | 1  |
| Lymph-BNHL     | 995a1ad2-faca-4a37-a59d-e62455985afb | 14 | 69256739  | 69262278  | 21  | 5539  | 4  | 7  | 10 | NA | NA | NA |
| Lymph-BNHL     | 995a1ad2-faca-4a37-a59d-e62455985afb | 14 | 106110093 | 106115124 | 12  | 5031  | 2  | 3  | 7  | NA | NA | NA |
| Lymph-BNHL     | 995a1ad2-faca-4a37-a59d-e62455985afb | 14 | 106208758 | 106215087 | 20  | 6329  | 2  | 4  | 10 | NA | 2  | 2  |
| Lymph-BNHL     | 995a1ad2-faca-4a37-a59d-e62455985afb | 14 | 106237000 | 106242534 | 23  | 5534  | 3  | 2  | 17 | 1  | NA | NA |
| Lymph-BNHL     | 995a1ad2-faca-4a37-a59d-e62455985afb | 14 | 106321039 | 106370993 | 108 | 49954 | 8  | 20 | 58 | 7  | 10 | 5  |
| Lymph-BNHL     | 995a1ad2-faca-4a37-a59d-e62455985afb | 14 | 106668134 | 106677533 | 16  | 9399  | NA | NA | 8  | 4  | NA | 4  |
| Lymph-BNHL     | 995a1ad2-faca-4a37-a59d-e62455985afb | 14 | 107176258 | 107179039 | 12  | 2781  | NA | 2  | 9  | NA | 1  | NA |
| Lymph-BNHL     | 995a1ad2-faca-4a37-a59d-e62455985afb | 14 | 107253677 | 107259526 | 7   | 5849  | NA | 2  | 4  | NA | NA | 1  |
| Lymph-BNHL     | 995a1ad2-faca-4a37-a59d-e62455985afb | 15 | 80256783  | 80270906  | 44  | 14123 | 3  | 11 | 22 | 1  | 7  | NA |
| Lymph-BNHL     | 995a1ad2-faca-4a37-a59d-e62455985afb | 15 | 80352303  | 80355725  | 30  | 3422  | 1  | 12 | 12 | NA | 3  | 2  |
| Lymph-BNHL     | 995a1ad2-faca-4a37-a59d-e62455985afb | 16 | 10971287  | 10974559  | 57  | 3272  | 4  | 13 | 39 | NA | NA | 1  |
| Lymph-BNHL     | 995a1ad2-faca-4a37-a59d-e62455985afb | 16 | 11347154  | 11349771  | 27  | 2617  | 4  | 6  | 15 | NA | 1  | 1  |
| Lymph-BNHL     | 995a1ad2-faca-4a37-a59d-e62455985afb | 17 | 56408450  | 56409665  | 14  | 1215  | NA | 3  | 9  | NA | 2  | NA |
| Lymph-BNHL     | 995a1ad2-faca-4a37-a59d-e62455985afb | 17 | 57915636  | 57918417  | 7   | 2781  | NA | 1  | 6  | NA | NA | NA |
| Lymph-BNHL     | 995a1ad2-faca-4a37-a59d-e62455985afb | 17 | 62006374  | 62009479  | 17  | 3105  | NA | 2  | 13 | 1  | 1  | NA |
| Lymph-BNHL     | 995a1ad2-faca-4a37-a59d-e62455985afb | 22 | 23223221  | 23294726  | 181 | 71505 | 7  | 31 | ## | 16 | 8  | 18 |

|                |                                      |    |           |           |    |       |    |    |    |    |    |    |
|----------------|--------------------------------------|----|-----------|-----------|----|-------|----|----|----|----|----|----|
| Lymph-BNHL     | 995a1ad2-faca-4a37-a59d-e62455985afb | 22 | 29195059  | 29196300  | 11 | 1241  | 1  | 4  | 4  | NA | 1  | 1  |
| Lymph-BNHL     | 995a1ad2-faca-4a37-a59d-e62455985afb | X  | 12993422  | 12994206  | 6  | 784   | NA | 1  | 3  | 1  | NA | 1  |
| Uterus-AdenoCA | 99696731-c88f-427b-975b-1d90013e63ff | 2  | 231189295 | 231189381 | 7  | 86    | NA | 1  | NA | 6  | NA | NA |
| Uterus-AdenoCA | 99696731-c88f-427b-975b-1d90013e63ff | 2  | 233827697 | 233828502 | 7  | 805   | 2  | 2  | 3  | NA | NA | NA |
| Liver-HCC      | 99bdc3da-c622-11e3-bf01-24c6515278c0 | 1  | 161786133 | 161787393 | 8  | 1260  | 1  | 3  | 4  | NA | NA | NA |
| Liver-HCC      | 99bdc3da-c622-11e3-bf01-24c6515278c0 | 1  | 162714525 | 162716000 | 13 | 1475  | 1  | 5  | 7  | NA | NA | NA |
| Liver-HCC      | 99bdc3da-c622-11e3-bf01-24c6515278c0 | 6  | 31432980  | 31435103  | 11 | 2123  | 1  | 3  | 7  | NA | NA | NA |
| Liver-HCC      | 99bdc3da-c622-11e3-bf01-24c6515278c0 | 8  | 73975581  | 73976092  | 8  | 511   | 1  | 4  | 3  | NA | NA | NA |
| Lymph-CLL      | 99e7016a-c3c1-431c-8838-beb78a3cc017 | 14 | 106211000 | 106213014 | 15 | 2014  | 1  | 1  | 13 | NA | NA | NA |
| Lymph-CLL      | 99e7016a-c3c1-431c-8838-beb78a3cc017 | 14 | 106324932 | 106330024 | 27 | 5092  | 3  | 4  | 13 | 5  | 1  | 1  |
| Lymph-CLL      | 99e7016a-c3c1-431c-8838-beb78a3cc017 | 14 | 107012993 | 107013849 | 25 | 856   | NA | 3  | 6  | 11 | 3  | 2  |
| Lymph-CLL      | 99e7016a-c3c1-431c-8838-beb78a3cc017 | 22 | 23055068  | 23055596  | 7  | 528   | NA | 3  | 2  | 1  | NA | 1  |
| Lymph-CLL      | 99e7016a-c3c1-431c-8838-beb78a3cc017 | 22 | 23235998  | 23242043  | 10 | 6045  | NA | 6  | NA | 2  | NA | 2  |
| Ovary-AdenoCA  | 9a5bb831-8cb8-4de0-b94b-088cb38def1a | 3  | 80594246  | 80596093  | 11 | 1847  | 4  | 4  | 3  | NA | NA | NA |
| Ovary-AdenoCA  | 9a5bb831-8cb8-4de0-b94b-088cb38def1a | 3  | 95640042  | 95642503  | 12 | 2461  | NA | 9  | 3  | NA | NA | NA |
| Ovary-AdenoCA  | 9a5bb831-8cb8-4de0-b94b-088cb38def1a | 3  | 102742299 | 102749133 | 9  | 6834  | 3  | 1  | 5  | NA | NA | NA |
| Ovary-AdenoCA  | 9a5bb831-8cb8-4de0-b94b-088cb38def1a | 3  | 129301933 | 129308374 | 37 | 6441  | 12 | 7  | 18 | NA | NA | NA |
| Ovary-AdenoCA  | 9a5bb831-8cb8-4de0-b94b-088cb38def1a | 3  | 133060655 | 133060980 | 7  | 325   | 1  | 1  | 5  | NA | NA | NA |
| Ovary-AdenoCA  | 9a5bb831-8cb8-4de0-b94b-088cb38def1a | 3  | 133289679 | 133291036 | 10 | 1357  | 2  | 2  | 6  | NA | NA | NA |
| Ovary-AdenoCA  | 9a5bb831-8cb8-4de0-b94b-088cb38def1a | 6  | 62932459  | 62934377  | 9  | 1918  | NA | 4  | 5  | NA | NA | NA |
| Ovary-AdenoCA  | 9a5bb831-8cb8-4de0-b94b-088cb38def1a | 7  | 141794857 | 141795277 | 8  | 420   | 1  | 3  | 4  | NA | NA | NA |
| Liver-HCC      | 9aac83e4-c622-11e3-bf01-24c6515278c0 | 19 | 6606281   | 6609761   | 16 | 3480  | NA | 4  | 12 | NA | NA | NA |
| Liver-HCC      | 9aac83e4-c622-11e3-bf01-24c6515278c0 | 19 | 15682351  | 15683757  | 38 | 1406  | NA | NA | 38 | NA | NA | NA |
| Liver-HCC      | 9aac83e4-c622-11e3-bf01-24c6515278c0 | 19 | 16084976  | 16086827  | 15 | 1851  | NA | 1  | 14 | NA | NA | NA |
| Liver-HCC      | 9aac83e4-c622-11e3-bf01-24c6515278c0 | 19 | 16352163  | 16353056  | 8  | 893   | NA | NA | 8  | NA | NA | NA |
| Kidney-RCC     | 9ae0744a-9bc1-4cd7-b7cf-c6569ed9e4aa | 8  | 106192950 | 106195484 | 6  | 2534  | NA | NA | 2  | 3  | NA | 1  |
| Kidney-RCC     | 9ae0744a-9bc1-4cd7-b7cf-c6569ed9e4aa | 11 | 20447637  | 20451749  | 7  | 4112  | 1  | 1  | 1  | 4  | NA | NA |
| Kidney-RCC     | 9ae0744a-9bc1-4cd7-b7cf-c6569ed9e4aa | X  | 125776946 | 125778117 | 8  | 1171  | 1  | 4  | 3  | NA | NA | NA |
| Eso-AdenoCa    | 9ae33a63-6b1a-43bf-9205-463c867bcbc4 | 10 | 113962107 | 113964102 | 6  | 1995  | 1  | 4  | 1  | NA | NA | NA |
| Lymph-BNHL     | 9b3e7a03-cf8c-4da8-bc36-20129d7783ba | 1  | 191181498 | 191184361 | 7  | 2863  | 1  | 1  | 1  | 3  | NA | 1  |
| Lymph-BNHL     | 9b3e7a03-cf8c-4da8-bc36-20129d7783ba | 2  | 12806180  | 12807014  | 6  | 834   | NA | 1  | 1  | 3  | NA | 1  |
| Lymph-BNHL     | 9b3e7a03-cf8c-4da8-bc36-20129d7783ba | 2  | 12829287  | 12832847  | 7  | 3560  | 2  | NA | 1  | 2  | 1  | 1  |
| Lymph-BNHL     | 9b3e7a03-cf8c-4da8-bc36-20129d7783ba | 2  | 89156968  | 89160851  | 97 | 3883  | 3  | 15 | 20 | 30 | 18 | 11 |
| Lymph-BNHL     | 9b3e7a03-cf8c-4da8-bc36-20129d7783ba | 3  | 171801583 | 171801730 | 7  | 147   | NA | 1  | NA | 1  | 2  | 3  |
| Lymph-BNHL     | 9b3e7a03-cf8c-4da8-bc36-20129d7783ba | 3  | 187460676 | 187463220 | 35 | 2544  | 2  | 9  | 8  | 9  | 6  | 1  |
| Lymph-BNHL     | 9b3e7a03-cf8c-4da8-bc36-20129d7783ba | 4  | 35001091  | 35002561  | 6  | 1470  | NA | NA | NA | 2  | 1  | 3  |
| Lymph-BNHL     | 9b3e7a03-cf8c-4da8-bc36-20129d7783ba | 4  | 180612447 | 180618765 | 9  | 6318  | 1  | 2  | NA | 5  | 1  | NA |
| Lymph-BNHL     | 9b3e7a03-cf8c-4da8-bc36-20129d7783ba | 6  | 14118169  | 14119087  | 10 | 918   | NA | 1  | 3  | 3  | 2  | 1  |
| Lymph-BNHL     | 9b3e7a03-cf8c-4da8-bc36-20129d7783ba | 6  | 102863784 | 102870184 | 8  | 6400  | 1  | NA | 1  | 5  | 1  | NA |
| Lymph-BNHL     | 9b3e7a03-cf8c-4da8-bc36-20129d7783ba | 6  | 134492247 | 134495835 | 8  | 3588  | 1  | 3  | 2  | 2  | NA | NA |
| Lymph-BNHL     | 9b3e7a03-cf8c-4da8-bc36-20129d7783ba | 7  | 12853689  | 12858915  | 7  | 5226  | NA | NA | NA | 2  | 2  | 3  |
| Lymph-BNHL     | 9b3e7a03-cf8c-4da8-bc36-20129d7783ba | 7  | 80258700  | 80263516  | 7  | 4816  | NA | 1  | NA | 3  | 1  | 2  |
| Lymph-BNHL     | 9b3e7a03-cf8c-4da8-bc36-20129d7783ba | 7  | 110663348 | 110675279 | 14 | 11931 | NA | NA | 3  | NA | 4  | 7  |
| Lymph-BNHL     | 9b3e7a03-cf8c-4da8-bc36-20129d7783ba | 7  | 110678267 | 110683761 | 7  | 5494  | NA | NA | NA | 2  | 2  | 3  |
| Lymph-BNHL     | 9b3e7a03-cf8c-4da8-bc36-20129d7783ba | 7  | 110716795 | 110725254 | 11 | 8459  | NA | 1  | NA | 6  | 2  | 2  |
| Lymph-BNHL     | 9b3e7a03-cf8c-4da8-bc36-20129d7783ba | 7  | 110765764 | 110774151 | 10 | 8387  | 1  | NA | NA | 2  | 1  | 6  |
| Lymph-BNHL     | 9b3e7a03-cf8c-4da8-bc36-20129d7783ba | 7  | 110804963 | 110809971 | 7  | 5008  | 1  | 1  | 2  | NA | 1  | 2  |
| Lymph-BNHL     | 9b3e7a03-cf8c-4da8-bc36-20129d7783ba | 7  | 110816285 | 110819541 | 8  | 3256  | NA | NA | 1  | 3  | 3  | 1  |
| Lymph-BNHL     | 9b3e7a03-cf8c-4da8-bc36-20129d7783ba | 7  | 110834882 | 110840008 | 7  | 5126  | NA | NA | NA | 3  | 2  | 2  |
| Lymph-BNHL     | 9b3e7a03-cf8c-4da8-bc36-20129d7783ba | 9  | 37025333  | 37026843  | 6  | 1510  | 2  | 1  | 3  | NA | NA | NA |
| Lymph-BNHL     | 9b3e7a03-cf8c-4da8-bc36-20129d7783ba | 10 | 58473504  | 58477558  | 8  | 4054  | 1  | NA | NA | 5  | 1  | 1  |
| Lymph-BNHL     | 9b3e7a03-cf8c-4da8-bc36-20129d7783ba | 11 | 40843087  | 40846984  | 7  | 3897  | NA | NA | NA | 3  | NA | 4  |
| Lymph-BNHL     | 9b3e7a03-cf8c-4da8-bc36-20129d7783ba | 12 | 122459241 | 122463184 | 18 | 3943  | NA | 3  | 12 | 3  | NA | NA |
| Lymph-BNHL     | 9b3e7a03-cf8c-4da8-bc36-20129d7783ba | 13 | 75983767  | 75991235  | 15 | 7468  | NA | 2  | 4  | 4  | 4  | 1  |
| Lymph-BNHL     | 9b3e7a03-cf8c-4da8-bc36-20129d7783ba | 14 | 106066575 | 106096399 | 38 | 29824 | 5  | 12 | 19 | 1  | NA | 1  |
| Lymph-BNHL     | 9b3e7a03-cf8c-4da8-bc36-20129d7783ba | 14 | 106209802 | 106213645 | 7  | 3843  | 2  | 4  | NA | NA | 1  | NA |
| Lymph-BNHL     | 9b3e7a03-cf8c-4da8-bc36-20129d7783ba | 14 | 106238463 | 106241463 | 12 | 3000  | 1  | 3  | 6  | NA | 2  | NA |
| Lymph-BNHL     | 9b3e7a03-cf8c-4da8-bc36-20129d7783ba | 14 | 106320057 | 106330136 | 79 | 10079 | 8  | 20 | 23 | 16 | 8  | 4  |
| Lymph-BNHL     | 9b3e7a03-cf8c-4da8-bc36-20129d7783ba | 14 | 106573644 | 106575949 | 15 | 2305  | NA | 2  | 4  | 2  | 5  | 2  |
| Lymph-BNHL     | 9b3e7a03-cf8c-4da8-bc36-20129d7783ba | 16 | 10971563  | 10974364  | 13 | 2801  | 1  | 3  | 9  | NA | NA | NA |

|                |                                      |    |           |           |     |       |    |    |    |    |    |    |
|----------------|--------------------------------------|----|-----------|-----------|-----|-------|----|----|----|----|----|----|
| Lymph-BNHL     | 9b3e7a03-cf8c-4da8-bc36-20129d7783ba | 18 | 60983923  | 60988087  | 35  | 4164  | 2  | 3  | 17 | 7  | 3  | 3  |
| Lymph-BNHL     | 9b3e7a03-cf8c-4da8-bc36-20129d7783ba | 22 | 23195456  | 23199232  | 6   | 3776  | 2  | NA | 1  | 2  | 1  | NA |
| Lymph-BNHL     | 9b3e7a03-cf8c-4da8-bc36-20129d7783ba | 22 | 23222116  | 23320018  | 179 | 97902 | 4  | 41 | 44 | 56 | 18 | 16 |
| Lymph-BNHL     | 9b3e7a03-cf8c-4da8-bc36-20129d7783ba | X  | 32824563  | 32836343  | 22  | 11780 | 1  | 1  | NA | 13 | 4  | 3  |
| Eso-AdenoCa    | 9ba6be6d-2032-444b-ab3c-dbee8023759d | 8  | 29053445  | 29057481  | 10  | 4036  | NA | 3  | 7  | NA | NA | NA |
| Eso-AdenoCa    | 9c00828e-e9ae-4b9c-959e-34837ee2b230 | 3  | 161042706 | 161046613 | 7   | 3907  | NA | NA | NA | 1  | 4  | 2  |
| Eso-AdenoCa    | 9c00828e-e9ae-4b9c-959e-34837ee2b230 | 12 | 70621089  | 70621949  | 7   | 860   | 2  | 5  | NA | NA | NA | NA |
| Eso-AdenoCa    | 9c00828e-e9ae-4b9c-959e-34837ee2b230 | 13 | 38565054  | 38569444  | 11  | 4390  | NA | 9  | 2  | NA | NA | NA |
| Lymph-BNHL     | 9c27fedd-b1b3-4af0-9e9b-20271854db08 | 2  | 89157089  | 89160111  | 26  | 3022  | 7  | 11 | 6  | 1  | 1  | NA |
| Lymph-BNHL     | 9c27fedd-b1b3-4af0-9e9b-20271854db08 | 2  | 111877993 | 111900426 | 26  | 22433 | 4  | 15 | 4  | 1  | 2  | NA |
| Lymph-BNHL     | 9c27fedd-b1b3-4af0-9e9b-20271854db08 | 3  | 187456241 | 187463989 | 28  | 7748  | 3  | 14 | 9  | NA | 2  | NA |
| Lymph-BNHL     | 9c27fedd-b1b3-4af0-9e9b-20271854db08 | 3  | 187957456 | 187963484 | 10  | 6028  | 1  | 4  | 2  | NA | 1  | 2  |
| Lymph-BNHL     | 9c27fedd-b1b3-4af0-9e9b-20271854db08 | 4  | 40196491  | 40202683  | 9   | 6192  | 2  | 4  | 2  | NA | 1  | NA |
| Lymph-BNHL     | 9c27fedd-b1b3-4af0-9e9b-20271854db08 | 5  | 36435192  | 36436825  | 6   | 1633  | 2  | 1  | 2  | NA | NA | 1  |
| Lymph-BNHL     | 9c27fedd-b1b3-4af0-9e9b-20271854db08 | 5  | 165554546 | 165554914 | 10  | 368   | 2  | 2  | 6  | NA | NA | NA |
| Lymph-BNHL     | 9c27fedd-b1b3-4af0-9e9b-20271854db08 | 6  | 14118301  | 14119735  | 24  | 1434  | 4  | 9  | 5  | 3  | 3  | NA |
| Lymph-BNHL     | 9c27fedd-b1b3-4af0-9e9b-20271854db08 | 6  | 134492472 | 134495359 | 7   | 2887  | NA | 2  | 5  | NA | NA | NA |
| Lymph-BNHL     | 9c27fedd-b1b3-4af0-9e9b-20271854db08 | 9  | 37383896  | 37385303  | 11  | 1407  | NA | 4  | 6  | NA | 1  | NA |
| Lymph-BNHL     | 9c27fedd-b1b3-4af0-9e9b-20271854db08 | 11 | 65190684  | 65191497  | 6   | 813   | 2  | 3  | 1  | NA | NA | NA |
| Lymph-BNHL     | 9c27fedd-b1b3-4af0-9e9b-20271854db08 | 12 | 8762578   | 8781460   | 24  | 18882 | 2  | 12 | 8  | NA | 2  | NA |
| Lymph-BNHL     | 9c27fedd-b1b3-4af0-9e9b-20271854db08 | 12 | 25205990  | 25211070  | 9   | 5080  | 1  | 7  | 1  | NA | NA | NA |
| Lymph-BNHL     | 9c27fedd-b1b3-4af0-9e9b-20271854db08 | 14 | 106327599 | 106348949 | 35  | 21350 | NA | 13 | 9  | 3  | 2  | 8  |
| Lymph-BNHL     | 9c27fedd-b1b3-4af0-9e9b-20271854db08 | 16 | 10971520  | 10974293  | 18  | 2773  | 2  | 8  | 8  | NA | NA | NA |
| Lymph-BNHL     | 9c27fedd-b1b3-4af0-9e9b-20271854db08 | 16 | 11348395  | 11349545  | 8   | 1150  | NA | 6  | 1  | NA | NA | 1  |
| Lymph-BNHL     | 9c27fedd-b1b3-4af0-9e9b-20271854db08 | 16 | 85932950  | 85943016  | 12  | 10066 | NA | 7  | 3  | 1  | 1  | NA |
| Lymph-BNHL     | 9c27fedd-b1b3-4af0-9e9b-20271854db08 | 20 | 7745637   | 7750741   | 8   | 5104  | NA | 2  | 2  | NA | NA | 4  |
| Lymph-BNHL     | 9c27fedd-b1b3-4af0-9e9b-20271854db08 | 20 | 49127316  | 49131185  | 9   | 3869  | 1  | 4  | 3  | NA | 1  | NA |
| Lymph-BNHL     | 9c27fedd-b1b3-4af0-9e9b-20271854db08 | 22 | 23223168  | 23236545  | 62  | 13377 | 4  | 32 | 14 | NA | 7  | 5  |
| Lymph-BNHL     | 9c27fedd-b1b3-4af0-9e9b-20271854db08 | X  | 33145671  | 33156617  | 15  | 10946 | 1  | 7  | 7  | NA | NA | NA |
| Lymph-BNHL     | 9c27fedd-b1b3-4af0-9e9b-20271854db08 | X  | 64069631  | 64071596  | 9   | 1965  | 1  | 4  | 3  | 1  | NA | NA |
| Panc-AdenoCA   | 9c399826-087f-44b9-98c0-bd881646b0f4 | 5  | 8472584   | 8473485   | 11  | 901   | 4  | 2  | 5  | NA | NA | NA |
| Panc-AdenoCA   | 9c399826-087f-44b9-98c0-bd881646b0f4 | 5  | 14613574  | 14613867  | 8   | 293   | 2  | NA | 6  | NA | NA | NA |
| Panc-AdenoCA   | 9c399826-087f-44b9-98c0-bd881646b0f4 | 11 | 20532344  | 20534677  | 17  | 2333  | 2  | 6  | 9  | NA | NA | NA |
| Panc-AdenoCA   | 9c399826-087f-44b9-98c0-bd881646b0f4 | 12 | 25413042  | 25413150  | 6   | 108   | NA | 3  | 3  | NA | NA | NA |
| Breast-AdenoCa | 9c70688d-6e43-4520-9262-eaae4e4d597d | 11 | 73448166  | 73449366  | 6   | 1200  | 1  | 3  | 1  | NA | 1  | NA |
| Breast-AdenoCa | 9c70688d-6e43-4520-9262-eaae4e4d597d | 11 | 79359322  | 79359728  | 9   | 406   | NA | 5  | 4  | NA | NA | NA |
| Breast-AdenoCa | 9c70688d-6e43-4520-9262-eaae4e4d597d | 17 | 29684279  | 29685030  | 7   | 751   | 2  | 4  | 1  | NA | NA | NA |
| Breast-AdenoCa | 9c70688d-6e43-4520-9262-eaae4e4d597d | 17 | 60390917  | 60392981  | 7   | 2064  | 1  | 2  | 4  | NA | NA | NA |
| Panc-AdenoCA   | 9c857452-c81d-4b9e-87a8-5b41f4394f7c | 12 | 44108022  | 44108539  | 6   | 517   | NA | 2  | 4  | NA | NA | NA |
| Panc-AdenoCA   | 9c857452-c81d-4b9e-87a8-5b41f4394f7c | 19 | 9450162   | 9452759   | 10  | 2597  | NA | 5  | 5  | NA | NA | NA |
| Liver-HCC      | 9cb80280-c622-11e3-bf01-24c6515278c0 | 10 | 57743410  | 57747333  | 9   | 3923  | 3  | 3  | 3  | NA | NA | NA |
| Panc-Endocrine | 9cfa4e8f-ea4d-433b-8c2c-54f66ecb7e43 | 6  | 796335    | 796655    | 6   | 320   | NA | NA | 6  | NA | NA | NA |
| Bone-Leiomyo   | 9d691fa3-5c32-4b98-85c4-f6e0fd4c37e0 | 1  | 26433165  | 26433605  | 10  | 440   | NA | NA | 10 | NA | NA | NA |
| Bone-Leiomyo   | 9d691fa3-5c32-4b98-85c4-f6e0fd4c37e0 | 4  | 13054932  | 13056691  | 7   | 1759  | 2  | 3  | 2  | NA | NA | NA |
| Bone-Leiomyo   | 9d691fa3-5c32-4b98-85c4-f6e0fd4c37e0 | 4  | 13565836  | 13567447  | 7   | 1611  | 3  | NA | 4  | NA | NA | NA |
| Bone-Leiomyo   | 9d691fa3-5c32-4b98-85c4-f6e0fd4c37e0 | 4  | 35709016  | 35709758  | 7   | 742   | NA | 2  | 5  | NA | NA | NA |
| Bone-Leiomyo   | 9d691fa3-5c32-4b98-85c4-f6e0fd4c37e0 | 12 | 34519401  | 34523523  | 9   | 4122  | 1  | 3  | 5  | NA | NA | NA |
| Bone-Leiomyo   | 9d691fa3-5c32-4b98-85c4-f6e0fd4c37e0 | 12 | 58632294  | 58636509  | 7   | 4215  | 2  | 1  | 4  | NA | NA | NA |
| Bone-Leiomyo   | 9d691fa3-5c32-4b98-85c4-f6e0fd4c37e0 | 12 | 63473412  | 63477190  | 7   | 3778  | NA | 2  | 5  | NA | NA | NA |
| Bone-Leiomyo   | 9d691fa3-5c32-4b98-85c4-f6e0fd4c37e0 | 12 | 63481588  | 63497544  | 33  | 15956 | 2  | 19 | 11 | 1  | NA | NA |
| Bone-Leiomyo   | 9d691fa3-5c32-4b98-85c4-f6e0fd4c37e0 | 12 | 65006354  | 65007279  | 9   | 925   | 1  | 5  | 3  | NA | NA | NA |
| Bone-Leiomyo   | 9d691fa3-5c32-4b98-85c4-f6e0fd4c37e0 | 12 | 68096405  | 68098407  | 7   | 2002  | NA | 1  | 6  | NA | NA | NA |
| Bone-Leiomyo   | 9d691fa3-5c32-4b98-85c4-f6e0fd4c37e0 | 12 | 68248123  | 68248805  | 7   | 682   | 2  | 3  | 2  | NA | NA | NA |
| Bone-Leiomyo   | 9d691fa3-5c32-4b98-85c4-f6e0fd4c37e0 | 12 | 130509426 | 130511010 | 7   | 1584  | NA | NA | 7  | NA | NA | NA |
| Bone-Leiomyo   | 9d691fa3-5c32-4b98-85c4-f6e0fd4c37e0 | 15 | 101454503 | 101457766 | 6   | 3263  | 2  | 2  | 2  | NA | NA | NA |
| Bone-Leiomyo   | 9d691fa3-5c32-4b98-85c4-f6e0fd4c37e0 | 17 | 28232263  | 28235390  | 6   | 3127  | 1  | 4  | 1  | NA | NA | NA |
| Breast-AdenoCa | 9ddf2119-a222-4fa5-a9f3-0bec7eeea36b | 1  | 62680446  | 62694376  | 39  | 13930 | 4  | 8  | 24 | NA | NA | 3  |
| Breast-AdenoCa | 9ddf2119-a222-4fa5-a9f3-0bec7eeea36b | 2  | 160852766 | 160860373 | 14  | 7607  | 1  | 6  | 7  | NA | NA | NA |
| Breast-AdenoCa | 9ddf2119-a222-4fa5-a9f3-0bec7eeea36b | 7  | 144216627 | 144220888 | 6   | 4261  | 2  | 2  | 2  | NA | NA | NA |
| Breast-AdenoCa | 9ddf2119-a222-4fa5-a9f3-0bec7eeea36b | 8  | 47927915  | 47928115  | 6   | 200   | 2  | 1  | 3  | NA | NA | NA |

|                |                                      |    |           |           |    |       |    |    |    |    |    |    |
|----------------|--------------------------------------|----|-----------|-----------|----|-------|----|----|----|----|----|----|
| Breast-AdenoCa | 9ddf2119-a222-4fa5-a9f3-0bec7eeea36b | 10 | 31569406  | 31572401  | 9  | 2995  | 2  | 3  | 3  | NA | 1  | NA |
| Breast-AdenoCa | 9ddf2119-a222-4fa5-a9f3-0bec7eeea36b | 19 | 5414034   | 5431526   | 54 | 17492 | 12 | 15 | 26 | NA | NA | 1  |
| Breast-AdenoCa | 9ddf2119-a222-4fa5-a9f3-0bec7eeea36b | 19 | 44487697  | 44498460  | 19 | 10763 | 6  | 3  | 10 | NA | NA | NA |
| Breast-AdenoCa | 9ddf2119-a222-4fa5-a9f3-0bec7eeea36b | 20 | 46702344  | 46705793  | 6  | 3449  | 2  | 2  | 2  | NA | NA | NA |
| Eso-AdenoCa    | 9de495d1-55b2-4535-9b0a-a999df35977c | 1  | 175888573 | 175889808 | 11 | 1235  | NA | 3  | 8  | NA | NA | NA |
| Panc-AdenoCA   | 9df57388-7de1-4c90-910e-ef63a246dff1 | 12 | 23603791  | 23612227  | 15 | 8436  | 2  | 8  | 5  | NA | NA | NA |
| Panc-AdenoCA   | 9df57388-7de1-4c90-910e-ef63a246dff1 | 12 | 24159176  | 24161019  | 10 | 1843  | 3  | 2  | 5  | NA | NA | NA |
| Panc-AdenoCA   | 9df57388-7de1-4c90-910e-ef63a246dff1 | 22 | 41218640  | 41219436  | 6  | 796   | 1  | 4  | 1  | NA | NA | NA |
| Panc-AdenoCA   | 9df57388-7de1-4c90-910e-ef63a246dff1 | 22 | 50095126  | 50096484  | 11 | 1358  | NA | 8  | 3  | NA | NA | NA |
| Skin-Melanoma  | 9e0009d1-c993-4247-9706-88ee84591dec | 4  | 41148422  | 41154543  | 9  | 6121  | 4  | 1  | 4  | NA | NA | NA |
| Skin-Melanoma  | 9e0009d1-c993-4247-9706-88ee84591dec | 4  | 54329195  | 54330937  | 7  | 1742  | 1  | 5  | 1  | NA | NA | NA |
| Skin-Melanoma  | 9e0009d1-c993-4247-9706-88ee84591dec | 4  | 54350086  | 54351151  | 10 | 1065  | NA | 6  | 3  | 1  | NA | NA |
| Skin-Melanoma  | 9e0009d1-c993-4247-9706-88ee84591dec | 4  | 55030253  | 55031247  | 7  | 994   | 1  | 3  | 3  | NA | NA | NA |
| Skin-Melanoma  | 9e0009d1-c993-4247-9706-88ee84591dec | 4  | 56938873  | 56940473  | 8  | 1600  | NA | 7  | 1  | NA | NA | NA |
| Skin-Melanoma  | 9e0009d1-c993-4247-9706-88ee84591dec | 4  | 97489966  | 97491558  | 7  | 1592  | NA | 4  | 3  | NA | NA | NA |
| Skin-Melanoma  | 9e0009d1-c993-4247-9706-88ee84591dec | 4  | 105146877 | 105149029 | 13 | 2152  | NA | 5  | 8  | NA | NA | NA |
| Skin-Melanoma  | 9e0009d1-c993-4247-9706-88ee84591dec | 4  | 106962968 | 106964980 | 20 | 2012  | 2  | 12 | 6  | NA | NA | NA |
| Skin-Melanoma  | 9e0009d1-c993-4247-9706-88ee84591dec | 5  | 3219157   | 3229200   | 34 | 10043 | 11 | 6  | 16 | NA | NA | 1  |
| Skin-Melanoma  | 9e0009d1-c993-4247-9706-88ee84591dec | 5  | 29220862  | 29226189  | 8  | 5327  | 3  | 2  | 3  | NA | NA | NA |
| Skin-Melanoma  | 9e0009d1-c993-4247-9706-88ee84591dec | 5  | 30519960  | 30526313  | 13 | 6353  | NA | 4  | 8  | 1  | NA | NA |
| Skin-Melanoma  | 9e0009d1-c993-4247-9706-88ee84591dec | 5  | 46074168  | 46077330  | 14 | 3162  | 2  | 4  | 7  | 1  | NA | NA |
| Skin-Melanoma  | 9e0009d1-c993-4247-9706-88ee84591dec | 8  | 53637052  | 53639828  | 6  | 2776  | 1  | 4  | 1  | NA | NA | NA |
| Skin-Melanoma  | 9e0009d1-c993-4247-9706-88ee84591dec | 8  | 57568076  | 57573927  | 24 | 5851  | 3  | 14 | 7  | NA | NA | NA |
| Skin-Melanoma  | 9e0009d1-c993-4247-9706-88ee84591dec | 8  | 62071019  | 62074580  | 10 | 3561  | NA | 7  | 3  | NA | NA | NA |
| Skin-Melanoma  | 9e0009d1-c993-4247-9706-88ee84591dec | 8  | 69714053  | 69722549  | 29 | 8496  | 3  | 3  | 23 | NA | NA | NA |
| Skin-Melanoma  | 9e0009d1-c993-4247-9706-88ee84591dec | 11 | 23801386  | 23804328  | 7  | 2942  | 1  | 2  | 4  | NA | NA | NA |
| Skin-Melanoma  | 9e0009d1-c993-4247-9706-88ee84591dec | 11 | 23869802  | 23871906  | 15 | 2104  | 1  | 12 | 2  | NA | NA | NA |
| Skin-Melanoma  | 9e0009d1-c993-4247-9706-88ee84591dec | 11 | 27507092  | 27512059  | 13 | 4967  | 1  | 10 | 2  | NA | NA | NA |
| Skin-Melanoma  | 9e0009d1-c993-4247-9706-88ee84591dec | 11 | 37505316  | 37508807  | 8  | 3491  | NA | 3  | 5  | NA | NA | NA |
| Skin-Melanoma  | 9e0009d1-c993-4247-9706-88ee84591dec | 11 | 37838680  | 37840436  | 7  | 1756  | 1  | 6  | NA | NA | NA | NA |
| Skin-Melanoma  | 9e0009d1-c993-4247-9706-88ee84591dec | 11 | 68321664  | 68325332  | 11 | 3668  | 4  | 2  | 5  | NA | NA | NA |
| Skin-Melanoma  | 9e0009d1-c993-4247-9706-88ee84591dec | 11 | 69591289  | 69595736  | 16 | 4447  | 5  | 2  | 8  | NA | 1  | NA |
| Skin-Melanoma  | 9e0009d1-c993-4247-9706-88ee84591dec | 11 | 69692133  | 69698082  | 10 | 5949  | NA | 1  | 9  | NA | NA | NA |
| Skin-Melanoma  | 9e0009d1-c993-4247-9706-88ee84591dec | 11 | 69959793  | 69964171  | 9  | 4378  | 2  | 3  | 4  | NA | NA | NA |
| Skin-Melanoma  | 9e0009d1-c993-4247-9706-88ee84591dec | 11 | 72280491  | 72285084  | 8  | 4593  | 1  | 2  | 5  | NA | NA | NA |
| Skin-Melanoma  | 9e0009d1-c993-4247-9706-88ee84591dec | 11 | 72435936  | 72438636  | 18 | 2700  | 4  | 3  | 10 | NA | NA | 1  |
| Skin-Melanoma  | 9e0009d1-c993-4247-9706-88ee84591dec | 11 | 74338314  | 74344517  | 8  | 6203  | 1  | 3  | 4  | NA | NA | NA |
| Skin-Melanoma  | 9e0009d1-c993-4247-9706-88ee84591dec | 11 | 76110637  | 76113656  | 7  | 3019  | NA | 3  | 4  | NA | NA | NA |
| Skin-Melanoma  | 9e0009d1-c993-4247-9706-88ee84591dec | 11 | 76519886  | 76527531  | 10 | 7645  | NA | 5  | 5  | NA | NA | NA |
| Skin-Melanoma  | 9e0009d1-c993-4247-9706-88ee84591dec | 11 | 76529897  | 76534298  | 7  | 4401  | NA | 3  | 4  | NA | NA | NA |
| Skin-Melanoma  | 9e0009d1-c993-4247-9706-88ee84591dec | 11 | 81782986  | 81785482  | 7  | 2496  | NA | 7  | NA | NA | NA | NA |
| Skin-Melanoma  | 9e0009d1-c993-4247-9706-88ee84591dec | 11 | 82162771  | 82169042  | 13 | 6271  | 3  | 5  | 5  | NA | NA | NA |
| Skin-Melanoma  | 9e0009d1-c993-4247-9706-88ee84591dec | 11 | 84725993  | 84730948  | 7  | 4955  | NA | 2  | 5  | NA | NA | NA |
| Skin-Melanoma  | 9e0009d1-c993-4247-9706-88ee84591dec | 12 | 67952864  | 67953983  | 9  | 1119  | NA | 7  | 2  | NA | NA | NA |
| Skin-Melanoma  | 9e0009d1-c993-4247-9706-88ee84591dec | 12 | 71222785  | 71224572  | 27 | 1787  | 3  | 3  | 21 | NA | NA | NA |
| Skin-Melanoma  | 9e0009d1-c993-4247-9706-88ee84591dec | 13 | 49992609  | 49996841  | 11 | 4232  | 1  | 7  | 3  | NA | NA | NA |
| Skin-Melanoma  | 9e0009d1-c993-4247-9706-88ee84591dec | 15 | 26324368  | 26327957  | 11 | 3589  | 1  | 3  | 7  | NA | NA | NA |
| Skin-Melanoma  | 9e0009d1-c993-4247-9706-88ee84591dec | 15 | 55824044  | 55827531  | 8  | 3487  | NA | 2  | 6  | NA | NA | NA |
| Skin-Melanoma  | 9e0009d1-c993-4247-9706-88ee84591dec | 16 | 65117615  | 65122465  | 15 | 4850  | 2  | 1  | 12 | NA | NA | NA |
| Skin-Melanoma  | 9e0009d1-c993-4247-9706-88ee84591dec | 17 | 17800937  | 17807974  | 9  | 7037  | NA | 5  | 4  | NA | NA | NA |
| Skin-Melanoma  | 9e0009d1-c993-4247-9706-88ee84591dec | 17 | 30991100  | 30994226  | 11 | 3126  | 3  | 2  | 6  | NA | NA | NA |
| Skin-Melanoma  | 9e0009d1-c993-4247-9706-88ee84591dec | 17 | 35040681  | 35051324  | 16 | 10643 | NA | 11 | 4  | NA | 1  | NA |
| Skin-Melanoma  | 9e0009d1-c993-4247-9706-88ee84591dec | 19 | 33182209  | 33182541  | 9  | 332   | 2  | 3  | 4  | NA | NA | NA |
| Skin-Melanoma  | 9e0009d1-c993-4247-9706-88ee84591dec | 21 | 16127282  | 16131114  | 7  | 3832  | NA | 5  | 2  | NA | NA | NA |
| Skin-Melanoma  | 9e0009d1-c993-4247-9706-88ee84591dec | 21 | 17425198  | 17429635  | 14 | 4437  | NA | 10 | 4  | NA | NA | NA |
| Prost-AdenoCA  | 9e272bea-9193-4c10-a802-f7e18b2937a3 | 5  | 96649159  | 96650210  | 10 | 1051  | 1  | 3  | 6  | NA | NA | NA |
| Prost-AdenoCA  | 9e272bea-9193-4c10-a802-f7e18b2937a3 | 5  | 97257903  | 97267328  | 17 | 9425  | NA | 8  | 9  | NA | NA | NA |
| Prost-AdenoCA  | 9e272bea-9193-4c10-a802-f7e18b2937a3 | 5  | 98187488  | 98193540  | 41 | 6052  | 2  | 15 | 24 | NA | NA | NA |
| Prost-AdenoCA  | 9e272bea-9193-4c10-a802-f7e18b2937a3 | 5  | 101260492 | 101265502 | 19 | 5010  | NA | 10 | 9  | NA | NA | NA |
| Prost-AdenoCA  | 9e272bea-9193-4c10-a802-f7e18b2937a3 | 7  | 15853026  | 15854251  | 16 | 1225  | 2  | 6  | 8  | NA | NA | NA |

|                  |                                       |    |           |           |    |       |    |    |    |    |    |    |
|------------------|---------------------------------------|----|-----------|-----------|----|-------|----|----|----|----|----|----|
| Prost-AdenoCA    | 9e272bea-9193-4c10-a802-f7e18b2937a3  | 7  | 123518632 | 123524010 | 7  | 5378  | 1  | 5  | 1  | NA | NA | NA |
| Prost-AdenoCA    | 9e272bea-9193-4c10-a802-f7e18b2937a3  | 8  | 43515218  | 43517230  | 15 | 2012  | 2  | 10 | 3  | NA | NA | NA |
| Prost-AdenoCA    | 9e272bea-9193-4c10-a802-f7e18b2937a3  | 12 | 16014045  | 16014562  | 8  | 517   | NA | NA | NA | 5  | 3  | NA |
| Prost-AdenoCA    | 9e272bea-9193-4c10-a802-f7e18b2937a3  | 12 | 16946870  | 16947568  | 10 | 698   | NA | 1  | NA | 1  | 8  | NA |
| ColoRect-AdenoCA | 9e5f0a23-e184-4611-b42b-e882dcf23acd  | 1  | 157602620 | 157604177 | 9  | 1557  | NA | NA | 1  | 8  | NA | NA |
| ColoRect-AdenoCA | 9e5f0a23-e184-4611-b42b-e882dcf23acd  | 4  | 178456464 | 178461622 | 7  | 5158  | 2  | 2  | 2  | 1  | NA | NA |
| ColoRect-AdenoCA | 9e5f0a23-e184-4611-b42b-e882dcf23acd  | 8  | 32229287  | 32233402  | 11 | 4115  | 3  | 4  | 4  | NA | NA | NA |
| Bone-Leiomyo     | 9e7b51fb-2249-451a-bf23-bb2a3d935928  | 1  | 6001660   | 6001859   | 9  | 199   | 3  | 2  | 4  | NA | NA | NA |
| Bone-Leiomyo     | 9e7b51fb-2249-451a-bf23-bb2a3d935928  | 1  | 6161362   | 6163009   | 13 | 1647  | 2  | 6  | 4  | NA | NA | 1  |
| Bone-Leiomyo     | 9e7b51fb-2249-451a-bf23-bb2a3d935928  | 1  | 188815515 | 188816200 | 9  | 685   | 1  | 3  | 5  | NA | NA | NA |
| Bone-Leiomyo     | 9e7b51fb-2249-451a-bf23-bb2a3d935928  | 2  | 15409     | 18532     | 13 | 3123  | NA | 12 | 1  | NA | NA | NA |
| Bone-Leiomyo     | 9e7b51fb-2249-451a-bf23-bb2a3d935928  | 2  | 103216514 | 103217939 | 9  | 1425  | 2  | 3  | 4  | NA | NA | NA |
| Bone-Leiomyo     | 9e7b51fb-2249-451a-bf23-bb2a3d935928  | 2  | 124757829 | 124770188 | 22 | 12359 | 4  | 12 | 6  | NA | NA | NA |
| Bone-Leiomyo     | 9e7b51fb-2249-451a-bf23-bb2a3d935928  | 2  | 142227225 | 142230297 | 12 | 3072  | 2  | 6  | 4  | NA | NA | NA |
| Bone-Leiomyo     | 9e7b51fb-2249-451a-bf23-bb2a3d935928  | 3  | 23383276  | 23386016  | 8  | 2740  | NA | 3  | 5  | NA | NA | NA |
| Bone-Leiomyo     | 9e7b51fb-2249-451a-bf23-bb2a3d935928  | 4  | 39293519  | 39294865  | 6  | 1346  | NA | 2  | 4  | NA | NA | NA |
| Bone-Leiomyo     | 9e7b51fb-2249-451a-bf23-bb2a3d935928  | 4  | 70666609  | 70667970  | 13 | 1361  | 3  | 6  | 4  | NA | NA | NA |
| Bone-Leiomyo     | 9e7b51fb-2249-451a-bf23-bb2a3d935928  | 11 | 30731134  | 30733919  | 11 | 2785  | 1  | 4  | 6  | NA | NA | NA |
| Bone-Leiomyo     | 9e7b51fb-2249-451a-bf23-bb2a3d935928  | 11 | 33671187  | 33676187  | 15 | 5000  | 3  | 10 | 2  | NA | NA | NA |
| Bone-Leiomyo     | 9e7b51fb-2249-451a-bf23-bb2a3d935928  | 14 | 32102169  | 32103005  | 9  | 836   | 2  | 5  | 2  | NA | NA | NA |
| Bone-Leiomyo     | 9e7b51fb-2249-451a-bf23-bb2a3d935928  | 15 | 57323633  | 57339400  | 24 | 15767 | 4  | 16 | 4  | NA | NA | NA |
| Bone-Leiomyo     | 9e7b51fb-2249-451a-bf23-bb2a3d935928  | 15 | 87173593  | 87177998  | 14 | 4405  | 5  | 6  | 3  | NA | NA | NA |
| Bone-Leiomyo     | 9e7b51fb-2249-451a-bf23-bb2a3d935928  | 18 | 255061    | 261741    | 11 | 6680  | 4  | 4  | 3  | NA | NA | NA |
| Bone-Leiomyo     | 9e7b51fb-2249-451a-bf23-bb2a3d935928  | 18 | 355938    | 371676    | 24 | 15738 | 6  | 10 | 8  | NA | NA | NA |
| Bone-Leiomyo     | 9e7b51fb-2249-451a-bf23-bb2a3d935928  | 18 | 10965461  | 10977186  | 35 | 11725 | 4  | 20 | 10 | 1  | NA | NA |
| Bone-Leiomyo     | 9e7b51fb-2249-451a-bf23-bb2a3d935928  | 18 | 40653952  | 40656091  | 13 | 2139  | 2  | 5  | 6  | NA | NA | NA |
| Bone-Leiomyo     | 9e7b51fb-2249-451a-bf23-bb2a3d935928  | 21 | 23191665  | 23193141  | 7  | 1476  | NA | 1  | 6  | NA | NA | NA |
| Bone-Leiomyo     | 9e7b51fb-2249-451a-bf23-bb2a3d935928  | Y  | 23317077  | 23317855  | 7  | 778   | NA | 5  | 1  | NA | NA | 1  |
| Lymph-BNHL       | 9e842227-2bc6-4185-bedb-abe03836b51   | 1  | 239876976 | 239881296 | 6  | 4320  | NA | NA | 2  | 3  | NA | 1  |
| Lymph-BNHL       | 9e842227-2bc6-4185-bedb-abe03836b51   | 2  | 89155721  | 89160403  | 89 | 4682  | 3  | 9  | 24 | 32 | 9  | 12 |
| Lymph-BNHL       | 9e842227-2bc6-4185-bedb-abe03836b51   | 2  | 136874837 | 136875306 | 8  | 469   | NA | 1  | 3  | 2  | 2  | NA |
| Lymph-BNHL       | 9e842227-2bc6-4185-bedb-abe03836b51   | 3  | 187461700 | 187468084 | 11 | 6384  | NA | 3  | 7  | 1  | NA | NA |
| Lymph-BNHL       | 9e842227-2bc6-4185-bedb-abe03836b51   | 12 | 86683411  | 86700952  | 25 | 17541 | 2  | 9  | 4  | 4  | 2  | 4  |
| Lymph-BNHL       | 9e842227-2bc6-4185-bedb-abe03836b51   | 13 | 38927142  | 38943935  | 23 | 16793 | NA | NA | 2  | 9  | 5  | 7  |
| Lymph-BNHL       | 9e842227-2bc6-4185-bedb-abe03836b51   | 14 | 106069127 | 106071055 | 9  | 1928  | 1  | 2  | 5  | NA | NA | 1  |
| Lymph-BNHL       | 9e842227-2bc6-4185-bedb-abe03836b51   | 14 | 106151157 | 106153334 | 8  | 2177  | NA | NA | 6  | 1  | NA | 1  |
| Lymph-BNHL       | 9e842227-2bc6-4185-bedb-abe03836b51   | 14 | 106212568 | 106213827 | 12 | 1259  | 1  | 2  | 8  | 1  | NA | NA |
| Lymph-BNHL       | 9e842227-2bc6-4185-bedb-abe03836b51   | 14 | 106323858 | 106329230 | 85 | 5372  | 2  | 16 | 31 | 17 | 8  | 11 |
| Lymph-BNHL       | 9e842227-2bc6-4185-bedb-abe03836b51   | 14 | 106815652 | 106816789 | 8  | 1137  | NA | 1  | 5  | NA | 2  | NA |
| Lymph-BNHL       | 9e842227-2bc6-4185-bedb-abe03836b51   | 18 | 60983828  | 60988357  | 51 | 4529  | 3  | 6  | 29 | 4  | 5  | 4  |
| Lymph-BNHL       | 9e842227-2bc6-4185-bedb-abe03836b51   | 22 | 23203674  | 23206325  | 6  | 2651  | NA | 1  | 4  | NA | 1  | NA |
| Lymph-BNHL       | 9e842227-2bc6-4185-bedb-abe03836b51   | 22 | 23223439  | 23283439  | 62 | 60000 | 5  | 12 | 29 | 8  | 6  | 2  |
| Panc-AdenoCA     | 9ebac79d-8b38-4469-837e-b834725fe6d5  | 19 | 32349427  | 32349700  | 6  | 273   | 1  | 2  | 3  | NA | NA | NA |
| Liver-HCC        | 9ec31146-c622-11e3-bf01-24c6515278c0  | 8  | 40141513  | 40142661  | 7  | 1148  | NA | NA | NA | 2  | 4  | 1  |
| Head-SCC         | 9fb6b7be-0084-48f7-a256-6d170e72e97f  | 2  | 175733063 | 175738985 | 14 | 5922  | NA | 6  | 8  | NA | NA | NA |
| Cervix-SCC       | 9ff21093-58d7-4b69-aade-c242a383ea56  | 3  | 113901416 | 113902321 | 7  | 905   | NA | 1  | 6  | NA | NA | NA |
| Cervix-SCC       | 9ff21093-58d7-4b69-aade-c242a383ea56  | 3  | 169358728 | 169360052 | 7  | 1324  | 4  | 2  | 1  | NA | NA | NA |
| Cervix-SCC       | 9ff21093-58d7-4b69-aade-c242a383ea56  | 21 | 17800146  | 17806964  | 8  | 6818  | 1  | 2  | 5  | NA | NA | NA |
| Cervix-SCC       | 9ff21093-58d7-4b69-aade-c242a383ea56  | X  | 58556014  | 58557351  | 9  | 1337  | 1  | 1  | 2  | NA | 3  | 2  |
| Panc-AdenoCA     | 9ffe694e-b488-489e-bdbe-0800e505eeec4 | 8  | 8550396   | 8550562   | 6  | 166   | NA | 2  | 4  | NA | NA | NA |
| Skin-Melanoma    | a0583407-712d-46f3-8c4e-4eeaa0149087  | 1  | 4116886   | 4117117   | 6  | 231   | NA | NA | 6  | NA | NA | NA |
| Skin-Melanoma    | a0583407-712d-46f3-8c4e-4eeaa0149087  | 8  | 107850011 | 107850799 | 6  | 788   | NA | NA | 1  | 1  | 2  | 2  |
| Skin-Melanoma    | a0583407-712d-46f3-8c4e-4eeaa0149087  | 12 | 40561199  | 40563234  | 7  | 2035  | 2  | 2  | 3  | NA | NA | NA |
| Skin-Melanoma    | a0583407-712d-46f3-8c4e-4eeaa0149087  | 12 | 45981834  | 45986149  | 9  | 4315  | NA | 4  | 4  | 1  | NA | NA |
| Skin-Melanoma    | a0583407-712d-46f3-8c4e-4eeaa0149087  | 12 | 51342308  | 51352497  | 13 | 10189 | 1  | 5  | 7  | NA | NA | NA |
| Skin-Melanoma    | a0583407-712d-46f3-8c4e-4eeaa0149087  | 12 | 59480612  | 59481380  | 14 | 768   | 5  | 4  | 5  | NA | NA | NA |
| Prost-AdenoCA    | a08ec059-7592-4698-bb45-25a9c3680c23  | 5  | 27678518  | 27681438  | 6  | 2920  | NA | NA | 1  | 5  | NA | NA |
| Ovary-AdenoCA    | a0bbb3b1-e774-4c75-9301-ba43fb803f20  | 8  | 95726439  | 95732540  | 18 | 6101  | NA | 3  | 15 | NA | NA | NA |
| Ovary-AdenoCA    | a0bbb3b1-e774-4c75-9301-ba43fb803f20  | 8  | 123021363 | 123028645 | 12 | 7282  | 1  | 6  | 3  | NA | NA | 2  |
| ColoRect-AdenoCA | a0f94565-9169-49ee-8e6a-21bdc43d9de6  | 20 | 6281555   | 6281564   | 7  | 9     | NA | 2  | 1  | 1  | 2  | 1  |

|                 |                                       |    |           |           |     |       |    |    |    |    |    |    |
|-----------------|---------------------------------------|----|-----------|-----------|-----|-------|----|----|----|----|----|----|
| Head-SCC        | a0fe80e0-e3ac-485b-8a1a-4c80c101b874  | 3  | 106400424 | 106404717 | 23  | 4293  | 2  | 16 | 5  | NA | NA | NA |
| Head-SCC        | a0fe80e0-e3ac-485b-8a1a-4c80c101b874  | 11 | 69992450  | 69998235  | 15  | 5785  | 3  | 4  | 8  | NA | NA | NA |
| Head-SCC        | a0fe80e0-e3ac-485b-8a1a-4c80c101b874  | 11 | 122036813 | 122037172 | 7   | 359   | 6  | NA | 1  | NA | NA | NA |
| Head-SCC        | a0fe80e0-e3ac-485b-8a1a-4c80c101b874  | 19 | 5906225   | 5907497   | 16  | 1272  | 2  | 4  | 10 | NA | NA | NA |
| Head-SCC        | a0fe80e0-e3ac-485b-8a1a-4c80c101b874  | 19 | 11883603  | 11885948  | 13  | 2345  | 4  | 7  | 2  | NA | NA | NA |
| Liver-HCC       | a1a75f66-c622-11e3-bf01-24c6515278c0  | 21 | 23820680  | 23822444  | 10  | 1764  | 2  | 6  | 2  | NA | NA | NA |
| Prost-AdenoCA   | a1af7c42-47af-435c-bb51-b932a3cd7b91  | 9  | 37833566  | 37834635  | 7   | 1069  | 1  | 4  | 2  | NA | NA | NA |
| Prost-AdenoCA   | a1af7c42-47af-435c-bb51-b932a3cd7b91  | 18 | 36338875  | 36342117  | 11  | 3242  | NA | 4  | 7  | NA | NA | NA |
| Eso-AdenoCa     | a1e3dc5b-b81f-4890-870c-ed3b8ac36dec  | 1  | 107885964 | 107888374 | 16  | 2410  | 4  | 8  | 4  | NA | NA | NA |
| Eso-AdenoCa     | a1e3dc5b-b81f-4890-870c-ed3b8ac36dec  | 11 | 56100569  | 56104067  | 10  | 3498  | 1  | 4  | 5  | NA | NA | NA |
| Eso-AdenoCa     | a1e3dc5b-b81f-4890-870c-ed3b8ac36dec  | 12 | 68823536  | 68825659  | 10  | 2123  | NA | NA | 10 | NA | NA | NA |
| Ovary-AdenoCA   | a1fc7064-abf5-477d-983e-576a784e1d40  | 19 | 40844762  | 40845712  | 10  | 950   | 3  | 6  | NA | NA | 1  | NA |
| Ovary-AdenoCA   | a1fc7064-abf5-477d-983e-576a784e1d40  | X  | 567289    | 568719    | 8   | 1430  | 2  | 4  | 2  | NA | NA | NA |
| Panc-AdenoCA    | a2238b5f-0513-487a-9b1b-7bef85ebf336  | 13 | 41424259  | 41427287  | 9   | 3028  | NA | 8  | 1  | NA | NA | NA |
| Panc-AdenoCA    | a2238b5f-0513-487a-9b1b-7bef85ebf336  | 13 | 41524609  | 41525410  | 8   | 801   | NA | 4  | 4  | NA | NA | NA |
| Panc-AdenoCA    | a2238b5f-0513-487a-9b1b-7bef85ebf336  | 17 | 13267652  | 13269661  | 8   | 2009  | 1  | 6  | 1  | NA | NA | NA |
| Panc-AdenoCA    | a2238b5f-0513-487a-9b1b-7bef85ebf336  | X  | 77766392  | 77766877  | 6   | 485   | NA | 5  | 1  | NA | NA | NA |
| Lymph-BNHL      | a29278af-7ecf-403e-b6a9-623ea7879d05  | 1  | 105865667 | 105869719 | 7   | 4052  | NA | NA | 2  | 2  | 1  | 2  |
| Lymph-BNHL      | a29278af-7ecf-403e-b6a9-623ea7879d05  | 1  | 203274945 | 203276256 | 12  | 1311  | 1  | 7  | 3  | NA | 1  | NA |
| Lymph-BNHL      | a29278af-7ecf-403e-b6a9-623ea7879d05  | 2  | 89127809  | 89134634  | 8   | 6825  | NA | NA | 1  | 3  | NA | 4  |
| Lymph-BNHL      | a29278af-7ecf-403e-b6a9-623ea7879d05  | 2  | 89137355  | 89246976  | 246 | 1E+05 | 6  | 34 | 43 | 84 | 35 | 44 |
| Lymph-BNHL      | a29278af-7ecf-403e-b6a9-623ea7879d05  | 2  | 146445889 | 146446480 | 7   | 591   | 2  | NA | NA | 3  | 2  | NA |
| Lymph-BNHL      | a29278af-7ecf-403e-b6a9-623ea7879d05  | 3  | 187460510 | 187470856 | 50  | 10346 | 5  | 14 | 11 | 12 | 4  | 4  |
| Lymph-BNHL      | a29278af-7ecf-403e-b6a9-623ea7879d05  | 3  | 187957814 | 187959747 | 7   | 1933  | NA | 1  | 3  | 2  | 1  | NA |
| Lymph-BNHL      | a29278af-7ecf-403e-b6a9-623ea7879d05  | 3  | 188468341 | 188472190 | 7   | 3849  | NA | 1  | NA | 2  | 1  | 3  |
| Lymph-BNHL      | a29278af-7ecf-403e-b6a9-623ea7879d05  | 4  | 47207     | 51222     | 9   | 4015  | NA | 1  | 3  | 1  | 2  | 2  |
| Lymph-BNHL      | a29278af-7ecf-403e-b6a9-623ea7879d05  | 4  | 59045342  | 59050831  | 7   | 5489  | NA | NA | 2  | 2  | 1  | 2  |
| Lymph-BNHL      | a29278af-7ecf-403e-b6a9-623ea7879d05  | 4  | 59067868  | 59069233  | 7   | 1365  | NA | NA | 1  | 2  | 3  | 1  |
| Lymph-BNHL      | a29278af-7ecf-403e-b6a9-623ea7879d05  | 6  | 91005484  | 91006032  | 6   | 548   | NA | 1  | 3  | 2  | NA | NA |
| Lymph-BNHL      | a29278af-7ecf-403e-b6a9-623ea7879d05  | 6  | 134494230 | 134501286 | 12  | 7056  | 2  | 3  | 4  | 2  | NA | 1  |
| Lymph-BNHL      | a29278af-7ecf-403e-b6a9-623ea7879d05  | 7  | 40846316  | 40849242  | 8   | 2926  | NA | 2  | NA | 2  | 4  | NA |
| Lymph-BNHL      | a29278af-7ecf-403e-b6a9-623ea7879d05  | 8  | 73230461  | 73232267  | 6   | 1806  | NA | NA | NA | 4  | 1  | 1  |
| Lymph-BNHL      | a29278af-7ecf-403e-b6a9-623ea7879d05  | 13 | 86308931  | 86311815  | 7   | 2884  | NA | NA | 1  | 2  | 2  | 2  |
| Lymph-BNHL      | a29278af-7ecf-403e-b6a9-623ea7879d05  | 14 | 106055794 | 106057796 | 12  | 2002  | NA | 4  | 8  | NA | NA | NA |
| Lymph-BNHL      | a29278af-7ecf-403e-b6a9-623ea7879d05  | 14 | 106173564 | 106175884 | 20  | 2320  | 5  | 2  | 8  | 2  | 2  | 1  |
| Lymph-BNHL      | a29278af-7ecf-403e-b6a9-623ea7879d05  | 14 | 106326944 | 106366865 | 126 | 39921 | 7  | 16 | 50 | 21 | 15 | 17 |
| Lymph-BNHL      | a29278af-7ecf-403e-b6a9-623ea7879d05  | 16 | 64355625  | 64356183  | 6   | 558   | NA | 1  | 1  | 4  | NA | NA |
| Lymph-BNHL      | a29278af-7ecf-403e-b6a9-623ea7879d05  | 19 | 10340746  | 10341618  | 6   | 872   | 1  | 2  | 2  | NA | NA | 1  |
| Lymph-BNHL      | a29278af-7ecf-403e-b6a9-623ea7879d05  | 22 | 23227173  | 23282947  | 186 | 55774 | 13 | 27 | 57 | 47 | 23 | 19 |
| Stomach-AdenoCA | a2e67393-50d7-4bbc-9bbd-c695086a936a  | 12 | 67282174  | 67283291  | 10  | 1117  | 1  | 7  | 2  | NA | NA | NA |
| Stomach-AdenoCA | a2e67393-50d7-4bbc-9bbd-c695086a936a  | 21 | 17205874  | 17207963  | 8   | 2089  | 1  | 6  | 1  | NA | NA | NA |
| Bone-Leiomyo    | a2f02ff7-8433-4cb5-9324-34f13edeaca1  | 3  | 168114450 | 168115338 | 15  | 888   | NA | 7  | 8  | NA | NA | NA |
| Bone-Leiomyo    | a2f02ff7-8433-4cb5-9324-34f13edeaca1  | 3  | 174069760 | 174075403 | 11  | 5643  | NA | 5  | 6  | NA | NA | NA |
| Bone-Leiomyo    | a2f02ff7-8433-4cb5-9324-34f13edeaca1  | 6  | 44145221  | 44146189  | 9   | 968   | NA | NA | 9  | NA | NA | NA |
| Bone-Leiomyo    | a2f02ff7-8433-4cb5-9324-34f13edeaca1  | 11 | 20475262  | 20476120  | 6   | 858   | NA | 2  | 4  | NA | NA | NA |
| Bone-Leiomyo    | a2f02ff7-8433-4cb5-9324-34f13edeaca1  | 12 | 69311201  | 69323968  | 21  | 12767 | 2  | 1  | 17 | NA | 1  | NA |
| Bone-Leiomyo    | a2f02ff7-8433-4cb5-9324-34f13edeaca1  | 12 | 71200803  | 71208696  | 9   | 7893  | 1  | 5  | 3  | NA | NA | NA |
| Bone-Leiomyo    | a2f02ff7-8433-4cb5-9324-34f13edeaca1  | 12 | 87168281  | 87168731  | 7   | 450   | NA | 3  | 4  | NA | NA | NA |
| Bone-Leiomyo    | a2f02ff7-8433-4cb5-9324-34f13edeaca1  | 12 | 89158535  | 89166088  | 16  | 7553  | NA | 2  | 14 | NA | NA | NA |
| Bone-Leiomyo    | a2f02ff7-8433-4cb5-9324-34f13edeaca1  | 19 | 28935523  | 28937178  | 7   | 1655  | NA | 3  | 4  | NA | NA | NA |
| Bone-Leiomyo    | a2f02ff7-8433-4cb5-9324-34f13edeaca1  | 19 | 29475664  | 29480055  | 7   | 4391  | NA | NA | 7  | NA | NA | NA |
| Bone-Leiomyo    | a2f02ff7-8433-4cb5-9324-34f13edeaca1  | 21 | 35309632  | 35315408  | 8   | 5776  | 2  | 4  | 2  | NA | NA | NA |
| Liver-HCC       | a2f1143d6-ba07-4ff0-960d-b29c3c716665 | 13 | 58683345  | 58683352  | 6   | 7     | NA | NA | NA | 3  | NA | 3  |
| Ovary-AdenoCA   | a3135834-3af0-4e98-bc6f-ad8ddf33db80  | 4  | 167631328 | 167632363 | 7   | 1035  | 4  | NA | 1  | NA | NA | 2  |
| Ovary-AdenoCA   | a3135834-3af0-4e98-bc6f-ad8ddf33db80  | 7  | 77889768  | 77891757  | 17  | 1989  | 5  | 3  | 9  | NA | NA | NA |
| Head-SCC        | a315b798-f037-48d5-91ed-e733e3bbd6ee  | 3  | 174756200 | 174760536 | 11  | 4336  | 2  | 3  | 5  | NA | NA | 1  |
| Head-SCC        | a315b798-f037-48d5-91ed-e733e3bbd6ee  | 4  | 43371936  | 43376446  | 8   | 4510  | 2  | 5  | 1  | NA | NA | NA |
| Head-SCC        | a315b798-f037-48d5-91ed-e733e3bbd6ee  | 6  | 64711707  | 64715017  | 11  | 3310  | 1  | 3  | 7  | NA | NA | NA |
| Head-SCC        | a315b798-f037-48d5-91ed-e733e3bbd6ee  | 10 | 85413288  | 85414782  | 11  | 1494  | 2  | 7  | 2  | NA | NA | NA |
| Head-SCC        | a315b798-f037-48d5-91ed-e733e3bbd6ee  | 10 | 85429420  | 85432181  | 23  | 2761  | 2  | 7  | 14 | NA | NA | NA |





|                  |                                      |    |           |           |     |       |    |    |    |    |    |    |
|------------------|--------------------------------------|----|-----------|-----------|-----|-------|----|----|----|----|----|----|
| Skin-Melanoma    | a6e24c2a-26b9-409c-bbcd-a8fcd1e437c  | 2  | 86999677  | 87000499  | 7   | 822   | NA | 1  | 5  | 1  | NA | NA |
| Skin-Melanoma    | a6e24c2a-26b9-409c-bbcd-a8fcd1e437c  | 3  | 110189152 | 110190468 | 8   | 1316  | NA | 7  | 1  | NA | NA | NA |
| Skin-Melanoma    | a6e24c2a-26b9-409c-bbcd-a8fcd1e437c  | 10 | 89396866  | 89397782  | 9   | 916   | NA | NA | 9  | NA | NA | NA |
| Skin-Melanoma    | a6e24c2a-26b9-409c-bbcd-a8fcd1e437c  | 20 | 8313053   | 8314844   | 31  | 1791  | 2  | 1  | 28 | NA | NA | NA |
| Panc-AdenoCA     | a6ebe0c0-8aab-4b9f-8328-4b795895a77d | 5  | 103305234 | 103305247 | 8   | 13    | 1  | NA | NA | NA | 1  | 6  |
| Panc-AdenoCA     | a6ebe0c0-8aab-4b9f-8328-4b795895a77d | 6  | 154569256 | 154569734 | 6   | 478   | NA | 3  | 3  | NA | NA | NA |
| Panc-AdenoCA     | a6ebe0c0-8aab-4b9f-8328-4b795895a77d | 6  | 156557950 | 156558259 | 12  | 309   | 1  | 7  | 4  | NA | NA | NA |
| Panc-AdenoCA     | a6ebe0c0-8aab-4b9f-8328-4b795895a77d | 6  | 159186028 | 159191746 | 7   | 5718  | 2  | 2  | 3  | NA | NA | NA |
| Panc-AdenoCA     | a6ebe0c0-8aab-4b9f-8328-4b795895a77d | 16 | 33578945  | 33587252  | 14  | 8307  | 3  | 1  | 1  | 3  | 3  | 3  |
| Panc-AdenoCA     | a6ebe0c0-8aab-4b9f-8328-4b795895a77d | 19 | 28684597  | 28685682  | 6   | 1085  | 1  | 3  | 2  | NA | NA | NA |
| CNS-Oligo        | a78544d7-65c6-4778-af62-ceec24c14056 | 12 | 43661071  | 43661699  | 6   | 628   | NA | 6  | NA | NA | NA | NA |
| Panc-AdenoCA     | a7a56d67-1bd7-4d69-9237-34c2d261261b | 3  | 134897227 | 134897250 | 12  | 23    | 2  | 3  | 2  | 2  | 2  | 1  |
| Panc-AdenoCA     | a7a56d67-1bd7-4d69-9237-34c2d261261b | 8  | 140122513 | 140122531 | 6   | 18    | 1  | 1  | NA | 2  | NA | 2  |
| Head-SCC         | a8041e86-071e-46cd-8fb5-7ecdc1ab0553 | 2  | 26198025  | 26206647  | 13  | 8622  | 1  | 3  | 9  | NA | NA | NA |
| Head-SCC         | a8041e86-071e-46cd-8fb5-7ecdc1ab0553 | 8  | 37920656  | 37924070  | 8   | 3414  | 1  | 2  | 5  | NA | NA | NA |
| Head-SCC         | a8041e86-071e-46cd-8fb5-7ecdc1ab0553 | 8  | 37952481  | 37979859  | 29  | 27378 | 2  | 10 | 17 | NA | NA | NA |
| Head-SCC         | a8041e86-071e-46cd-8fb5-7ecdc1ab0553 | 8  | 38020443  | 38031036  | 12  | 10593 | 1  | 8  | 3  | NA | NA | NA |
| Head-SCC         | a8041e86-071e-46cd-8fb5-7ecdc1ab0553 | 8  | 38035073  | 38041751  | 8   | 6678  | NA | 6  | 2  | NA | NA | NA |
| Head-SCC         | a8041e86-071e-46cd-8fb5-7ecdc1ab0553 | 8  | 38049916  | 38055500  | 7   | 5584  | NA | 2  | 5  | NA | NA | NA |
| Head-SCC         | a8041e86-071e-46cd-8fb5-7ecdc1ab0553 | 8  | 38060471  | 38080774  | 39  | 20303 | 2  | 10 | 27 | NA | NA | NA |
| Head-SCC         | a8041e86-071e-46cd-8fb5-7ecdc1ab0553 | 10 | 123072756 | 123076113 | 9   | 3357  | 1  | 6  | 2  | NA | NA | NA |
| Liver-HCC        | a846f5e8-c622-11e3-bf01-24c6515278c0 | 4  | 31816701  | 31819906  | 9   | 3205  | NA | NA | NA | 4  | NA | 5  |
| Liver-HCC        | a846f5e8-c622-11e3-bf01-24c6515278c0 | 12 | 33761699  | 33763383  | 11  | 1684  | NA | 7  | 4  | NA | NA | NA |
| Breast-AdenoCa   | a85cf239-ff51-46e7-9b88-4c2cb49c66b9 | 6  | 138015769 | 138016952 | 6   | 1183  | 1  | 2  | 3  | NA | NA | NA |
| Breast-AdenoCa   | a85cf239-ff51-46e7-9b88-4c2cb49c66b9 | 10 | 4057985   | 4059424   | 7   | 1439  | 2  | 4  | 1  | NA | NA | NA |
| Breast-AdenoCa   | a85cf239-ff51-46e7-9b88-4c2cb49c66b9 | X  | 86887944  | 86887951  | 6   | 7     | NA | 1  | 3  | NA | NA | 2  |
| Breast-AdenoCa   | a876398c-5b1d-444f-a360-5fe2db697480 | 11 | 96115608  | 96117312  | 9   | 1704  | 3  | 2  | 4  | NA | NA | NA |
| Breast-AdenoCa   | a876398c-5b1d-444f-a360-5fe2db697480 | 22 | 37756376  | 37758810  | 7   | 2434  | 2  | 1  | 2  | NA | 2  | NA |
| Breast-AdenoCa   | a876398c-5b1d-444f-a360-5fe2db697480 | X  | 66889699  | 66890350  | 6   | 651   | NA | NA | 1  | 1  | NA | 4  |
| Kidney-RCC       | a9dbd55c-5dcc-48db-8785-6baef3fd7db  | 16 | 34272356  | 34274389  | 6   | 2033  | NA | 3  | 2  | NA | 1  | NA |
| Kidney-RCC       | a9dbd55c-5dcc-48db-8785-6baef3fd7db  | 16 | 64151091  | 64152307  | 12  | 1216  | 1  | 7  | 4  | NA | NA | NA |
| ColoRect-AdenoCA | aa06ae46-2336-4666-a3af-fc790daf8da4 | 12 | 4186508   | 4186946   | 6   | 438   | 2  | 2  | 2  | NA | NA | NA |
| ColoRect-AdenoCA | aa06ae46-2336-4666-a3af-fc790daf8da4 | 12 | 4663005   | 4668575   | 9   | 5570  | 2  | 3  | 4  | NA | NA | NA |
| ColoRect-AdenoCA | aa06ae46-2336-4666-a3af-fc790daf8da4 | 12 | 6429094   | 6435420   | 12  | 6326  | 6  | 2  | 3  | 1  | NA | NA |
| ColoRect-AdenoCA | aa06ae46-2336-4666-a3af-fc790daf8da4 | 12 | 6537666   | 6540831   | 9   | 3165  | 1  | 1  | 7  | NA | NA | NA |
| ColoRect-AdenoCA | aa06ae46-2336-4666-a3af-fc790daf8da4 | 12 | 32724616  | 32725472  | 7   | 856   | 2  | 3  | 2  | NA | NA | NA |
| ColoRect-AdenoCA | aa06ae46-2336-4666-a3af-fc790daf8da4 | 12 | 32919175  | 32923670  | 8   | 4495  | 4  | 2  | 2  | NA | NA | NA |
| ColoRect-AdenoCA | aa06ae46-2336-4666-a3af-fc790daf8da4 | 12 | 49794728  | 49798716  | 8   | 3988  | 1  | 2  | 5  | NA | NA | NA |
| ColoRect-AdenoCA | aa06ae46-2336-4666-a3af-fc790daf8da4 | 12 | 50684666  | 50685479  | 8   | 813   | 2  | 1  | 5  | NA | NA | NA |
| ColoRect-AdenoCA | aa06ae46-2336-4666-a3af-fc790daf8da4 | 12 | 51168236  | 51174865  | 12  | 6629  | 3  | 7  | 2  | NA | NA | NA |
| ColoRect-AdenoCA | aa06ae46-2336-4666-a3af-fc790daf8da4 | 12 | 57581720  | 57590395  | 13  | 8675  | 6  | 6  | 1  | NA | NA | NA |
| ColoRect-AdenoCA | aa06ae46-2336-4666-a3af-fc790daf8da4 | 12 | 58082203  | 58083255  | 12  | 1052  | 3  | 3  | 6  | NA | NA | NA |
| ColoRect-AdenoCA | aa06ae46-2336-4666-a3af-fc790daf8da4 | 12 | 93402174  | 93407253  | 8   | 5079  | NA | 2  | 6  | NA | NA | NA |
| ColoRect-AdenoCA | aa06ae46-2336-4666-a3af-fc790daf8da4 | 12 | 112191771 | 112196101 | 8   | 4330  | 6  | NA | 2  | NA | NA | NA |
| ColoRect-AdenoCA | aa06ae46-2336-4666-a3af-fc790daf8da4 | 12 | 112744619 | 112750486 | 11  | 5867  | 1  | 2  | 7  | NA | NA | 1  |
| ColoRect-AdenoCA | aa06ae46-2336-4666-a3af-fc790daf8da4 | 12 | 122232575 | 122236979 | 7   | 4404  | 1  | 2  | 4  | NA | NA | NA |
| ColoRect-AdenoCA | aa06ae46-2336-4666-a3af-fc790daf8da4 | 12 | 123637930 | 123643786 | 9   | 5856  | 3  | 3  | 1  | NA | 1  | 1  |
| ColoRect-AdenoCA | aa06ae46-2336-4666-a3af-fc790daf8da4 | 12 | 132223505 | 132231095 | 11  | 7590  | 2  | 2  | 7  | NA | NA | NA |
| ColoRect-AdenoCA | aa06ae46-2336-4666-a3af-fc790daf8da4 | 21 | 30521595  | 30522928  | 9   | 1333  | 2  | 5  | 2  | NA | NA | NA |
| Panc-AdenoCA     | aa4a868a-df23-4eef-a618-e945aa2ce98a | 4  | 131265569 | 131267713 | 6   | 2144  | NA | NA | 6  | NA | NA | NA |
| Panc-AdenoCA     | aa4a868a-df23-4eef-a618-e945aa2ce98a | 4  | 136152042 | 136152273 | 9   | 231   | 2  | 3  | 4  | NA | NA | NA |
| Panc-AdenoCA     | aa4a868a-df23-4eef-a618-e945aa2ce98a | 5  | 36058599  | 36058657  | 6   | 58    | NA | NA | 5  | 1  | NA | NA |
| Panc-AdenoCA     | aa4a868a-df23-4eef-a618-e945aa2ce98a | 8  | 13572152  | 13575800  | 7   | 3648  | NA | NA | NA | 4  | 1  | 2  |
| Panc-AdenoCA     | aa4a868a-df23-4eef-a618-e945aa2ce98a | 9  | 28204202  | 28214187  | 13  | 9985  | 1  | 10 | 2  | NA | NA | NA |
| Panc-AdenoCA     | aa4a868a-df23-4eef-a618-e945aa2ce98a | 13 | 60407537  | 60409806  | 6   | 2269  | NA | NA | NA | 3  | 2  | 1  |
| Lymph-BNHL       | aa847c3d-d3a7-46aa-a81b-db5099a458fb | 8  | 128749217 | 128752907 | 27  | 3690  | NA | 6  | 11 | 6  | 1  | 3  |
| Lymph-BNHL       | aa847c3d-d3a7-46aa-a81b-db5099a458fb | 8  | 128807530 | 128809016 | 8   | 1486  | NA | NA | 3  | 5  | NA | NA |
| Lymph-BNHL       | aa847c3d-d3a7-46aa-a81b-db5099a458fb | 14 | 106237883 | 106250359 | 32  | 12476 | 2  | 9  | 13 | 3  | 2  | 3  |
| Lymph-BNHL       | aa847c3d-d3a7-46aa-a81b-db5099a458fb | 14 | 106318497 | 106356712 | 158 | 38215 | 7  | 48 | 47 | 27 | 10 | 19 |
| Lymph-BNHL       | aa847c3d-d3a7-46aa-a81b-db5099a458fb | 14 | 107048788 | 107049618 | 7   | 830   | NA | 2  | NA | 2  | 1  | 2  |

|                |                                      |    |           |           |     |       |    |    |    |    |    |    |
|----------------|--------------------------------------|----|-----------|-----------|-----|-------|----|----|----|----|----|----|
| Lymph-BNHL     | aa847c3d-d3a7-46aa-a81b-db5099a458fb | 22 | 23040686  | 23041566  | 10  | 880   | 1  | 2  | 5  | 2  | NA | NA |
| Lymph-BNHL     | aa847c3d-d3a7-46aa-a81b-db5099a458fb | 22 | 23055169  | 23055622  | 12  | 453   | 1  | 3  | 5  | 3  | NA | NA |
| Lymph-BNHL     | aa847c3d-d3a7-46aa-a81b-db5099a458fb | 22 | 23100821  | 23115032  | 45  | 14211 | 6  | 8  | 14 | 10 | 2  | 5  |
| Lymph-BNHL     | aa847c3d-d3a7-46aa-a81b-db5099a458fb | 22 | 23235975  | 23247836  | 46  | 11861 | 4  | 12 | 15 | 11 | 2  | 2  |
| Liver-HCC      | aabddb20-c622-11e3-bf01-24c6515278c0 | 12 | 68457777  | 68459682  | 6   | 1905  | NA | NA | 6  | NA | NA | NA |
| Breast-AdenoCa | aacaba97-ecde-440b-aae0-0e9c608c4b24 | 14 | 74292169  | 74295440  | 8   | 3271  | 1  | 1  | 5  | 1  | NA | NA |
| Breast-AdenoCa | aacaba97-ecde-440b-aae0-0e9c608c4b24 | 17 | 56831141  | 56831621  | 6   | 480   | NA | NA | 6  | NA | NA | NA |
| Prost-AdenoCA  | ab8a55ed-ff47-4cad-ad91-52b9dc25aca7 | 1  | 106486375 | 106489406 | 11  | 3031  | 1  | 2  | 1  | 4  | 2  | 1  |
| Prost-AdenoCA  | ab8a55ed-ff47-4cad-ad91-52b9dc25aca7 | 20 | 35286184  | 35290481  | 8   | 4297  | NA | 4  | 4  | NA | NA | NA |
| Prost-AdenoCA  | ab8a55ed-ff47-4cad-ad91-52b9dc25aca7 | X  | 83966025  | 83967824  | 8   | 1799  | 1  | NA | 4  | 2  | NA | 1  |
| Head-SCC       | ab923db7-54e8-4a50-b7fd-c2b4b300041e | 2  | 919790    | 923529    | 6   | 3739  | 1  | 1  | 4  | NA | NA | NA |
| Head-SCC       | ab923db7-54e8-4a50-b7fd-c2b4b300041e | 3  | 8766336   | 8767953   | 7   | 1617  | NA | 3  | 4  | NA | NA | NA |
| Head-SCC       | ab923db7-54e8-4a50-b7fd-c2b4b300041e | 7  | 46868269  | 46872152  | 9   | 3883  | 1  | 2  | 5  | NA | NA | 1  |
| Liver-HCC      | abbbe65c-c622-11e3-bf01-24c6515278c0 | 4  | 36143554  | 36145719  | 7   | 2165  | NA | 1  | NA | NA | 6  | NA |
| Bladder-TCC    | abd2d959-d5ed-4eb3-9759-67eb1aa23325 | 1  | 27207323  | 27212425  | 9   | 5102  | 1  | 6  | 2  | NA | NA | NA |
| Bladder-TCC    | abd2d959-d5ed-4eb3-9759-67eb1aa23325 | 2  | 7476145   | 7479320   | 19  | 3175  | NA | NA | 19 | NA | NA | NA |
| Bladder-TCC    | abd2d959-d5ed-4eb3-9759-67eb1aa23325 | 2  | 219420916 | 219423573 | 7   | 2657  | NA | 5  | 2  | NA | NA | NA |
| Bladder-TCC    | abd2d959-d5ed-4eb3-9759-67eb1aa23325 | 2  | 238576742 | 238578740 | 7   | 1998  | 1  | 2  | 4  | NA | NA | NA |
| Bladder-TCC    | abd2d959-d5ed-4eb3-9759-67eb1aa23325 | 3  | 14716772  | 14718119  | 8   | 1347  | NA | NA | 8  | NA | NA | NA |
| Bladder-TCC    | abd2d959-d5ed-4eb3-9759-67eb1aa23325 | 3  | 47603386  | 47611750  | 24  | 8364  | NA | 5  | 19 | NA | NA | NA |
| Bladder-TCC    | abd2d959-d5ed-4eb3-9759-67eb1aa23325 | 3  | 156945385 | 156948725 | 11  | 3340  | 2  | 6  | 3  | NA | NA | NA |
| Bladder-TCC    | abd2d959-d5ed-4eb3-9759-67eb1aa23325 | 4  | 153284854 | 153288499 | 6   | 3645  | 1  | 3  | 2  | NA | NA | NA |
| Bladder-TCC    | abd2d959-d5ed-4eb3-9759-67eb1aa23325 | 5  | 108147645 | 108152559 | 6   | 4914  | 1  | 1  | 4  | NA | NA | NA |
| Bladder-TCC    | abd2d959-d5ed-4eb3-9759-67eb1aa23325 | 6  | 1304050   | 1310883   | 8   | 6833  | NA | 1  | 7  | NA | NA | NA |
| Bladder-TCC    | abd2d959-d5ed-4eb3-9759-67eb1aa23325 | 6  | 107694944 | 107696104 | 10  | 1160  | 1  | 5  | 4  | NA | NA | NA |
| Bladder-TCC    | abd2d959-d5ed-4eb3-9759-67eb1aa23325 | 6  | 107709990 | 107712434 | 20  | 2444  | 2  | 9  | 8  | 1  | NA | NA |
| Bladder-TCC    | abd2d959-d5ed-4eb3-9759-67eb1aa23325 | 6  | 108895743 | 108906705 | 15  | 10962 | 1  | 4  | 9  | 1  | NA | NA |
| Bladder-TCC    | abd2d959-d5ed-4eb3-9759-67eb1aa23325 | 8  | 110752357 | 110757379 | 11  | 5022  | 2  | 4  | 5  | NA | NA | NA |
| Bladder-TCC    | abd2d959-d5ed-4eb3-9759-67eb1aa23325 | 8  | 123372735 | 123373965 | 17  | 1230  | 2  | 7  | 8  | NA | NA | NA |
| Bladder-TCC    | abd2d959-d5ed-4eb3-9759-67eb1aa23325 | 8  | 143564091 | 143569453 | 10  | 5362  | 1  | 3  | 6  | NA | NA | NA |
| Bladder-TCC    | abd2d959-d5ed-4eb3-9759-67eb1aa23325 | 9  | 123441696 | 123443072 | 6   | 1376  | NA | 3  | 3  | NA | NA | NA |
| Bladder-TCC    | abd2d959-d5ed-4eb3-9759-67eb1aa23325 | 10 | 105507558 | 105509279 | 11  | 1721  | NA | 8  | 3  | NA | NA | NA |
| Bladder-TCC    | abd2d959-d5ed-4eb3-9759-67eb1aa23325 | 11 | 12719978  | 12722113  | 7   | 2135  | NA | 5  | 2  | NA | NA | NA |
| Bladder-TCC    | abd2d959-d5ed-4eb3-9759-67eb1aa23325 | 11 | 87878907  | 87880843  | 10  | 1936  | 1  | 3  | 6  | NA | NA | NA |
| Bladder-TCC    | abd2d959-d5ed-4eb3-9759-67eb1aa23325 | 12 | 5412796   | 5413743   | 7   | 947   | 1  | 2  | 4  | NA | NA | NA |
| Bladder-TCC    | abd2d959-d5ed-4eb3-9759-67eb1aa23325 | 12 | 47637961  | 47639970  | 7   | 2009  | 1  | 4  | 2  | NA | NA | NA |
| Bladder-TCC    | abd2d959-d5ed-4eb3-9759-67eb1aa23325 | 16 | 30723437  | 30726984  | 7   | 3547  | NA | 5  | 2  | NA | NA | NA |
| Bladder-TCC    | abd2d959-d5ed-4eb3-9759-67eb1aa23325 | 19 | 13265860  | 13267745  | 6   | 1885  | 2  | 1  | 3  | NA | NA | NA |
| Bladder-TCC    | abd2d959-d5ed-4eb3-9759-67eb1aa23325 | 19 | 42759517  | 42762209  | 9   | 2692  | 1  | 3  | 5  | NA | NA | NA |
| Bladder-TCC    | abd2d959-d5ed-4eb3-9759-67eb1aa23325 | 21 | 45760929  | 45763035  | 6   | 2106  | NA | 4  | 2  | NA | NA | NA |
| Bladder-TCC    | abd2d959-d5ed-4eb3-9759-67eb1aa23325 | 22 | 39853982  | 39861472  | 14  | 7490  | NA | 4  | 8  | NA | 1  | 1  |
| Lymph-BNHL     | abedd46c-47b8-4242-adb6-12835400cb3f | 1  | 11081297  | 11086147  | 6   | 4850  | NA | NA | 1  | 2  | 1  | 2  |
| Lymph-BNHL     | abedd46c-47b8-4242-adb6-12835400cb3f | 1  | 111250237 | 111253194 | 7   | 2957  | NA | NA | 1  | 3  | NA | 3  |
| Lymph-BNHL     | abedd46c-47b8-4242-adb6-12835400cb3f | 2  | 17582772  | 17585521  | 6   | 2749  | 1  | NA | NA | 1  | 1  | 3  |
| Lymph-BNHL     | abedd46c-47b8-4242-adb6-12835400cb3f | 2  | 89127478  | 89292176  | 274 | 2E+05 | 13 | 25 | 26 | 89 | 57 | 64 |
| Lymph-BNHL     | abedd46c-47b8-4242-adb6-12835400cb3f | 2  | 126106541 | 126119357 | 15  | 12816 | NA | NA | 1  | 7  | 5  | 2  |
| Lymph-BNHL     | abedd46c-47b8-4242-adb6-12835400cb3f | 2  | 136875077 | 136875507 | 8   | 430   | 1  | 1  | NA | NA | 2  | 4  |
| Lymph-BNHL     | abedd46c-47b8-4242-adb6-12835400cb3f | 2  | 146878398 | 146878677 | 7   | 279   | NA | NA | NA | 4  | 3  | NA |
| Lymph-BNHL     | abedd46c-47b8-4242-adb6-12835400cb3f | 3  | 16494858  | 16495899  | 6   | 1041  | NA | 1  | NA | 2  | 1  | 2  |
| Lymph-BNHL     | abedd46c-47b8-4242-adb6-12835400cb3f | 3  | 110336166 | 110336961 | 7   | 795   | NA | NA | NA | 5  | 1  | 1  |
| Lymph-BNHL     | abedd46c-47b8-4242-adb6-12835400cb3f | 3  | 166293088 | 166302561 | 15  | 9473  | 1  | 1  | NA | 6  | 3  | 4  |
| Lymph-BNHL     | abedd46c-47b8-4242-adb6-12835400cb3f | 3  | 187460864 | 187481654 | 60  | 20790 | 4  | 13 | 7  | 21 | 8  | 7  |
| Lymph-BNHL     | abedd46c-47b8-4242-adb6-12835400cb3f | 3  | 187657482 | 187664650 | 11  | 7168  | NA | 2  | NA | 5  | 2  | 2  |
| Lymph-BNHL     | abedd46c-47b8-4242-adb6-12835400cb3f | 3  | 187957842 | 187960053 | 22  | 2211  | NA | 1  | 1  | 12 | 3  | 5  |
| Lymph-BNHL     | abedd46c-47b8-4242-adb6-12835400cb3f | 3  | 188465846 | 188472265 | 20  | 6419  | 1  | 1  | 1  | 13 | 3  | 1  |
| Lymph-BNHL     | abedd46c-47b8-4242-adb6-12835400cb3f | 4  | 40199118  | 40202119  | 17  | 3001  | 1  | 1  | 2  | 5  | 5  | 3  |
| Lymph-BNHL     | abedd46c-47b8-4242-adb6-12835400cb3f | 4  | 63934404  | 63944346  | 15  | 9942  | NA | 1  | NA | 7  | 3  | 4  |
| Lymph-BNHL     | abedd46c-47b8-4242-adb6-12835400cb3f | 5  | 162518136 | 162522000 | 6   | 3864  | NA | NA | NA | 2  | 2  | 2  |
| Lymph-BNHL     | abedd46c-47b8-4242-adb6-12835400cb3f | 6  | 19570260  | 19574867  | 7   | 4607  | NA | 1  | NA | 5  | NA | 1  |
| Lymph-BNHL     | abedd46c-47b8-4242-adb6-12835400cb3f | 6  | 31549590  | 31550010  | 15  | 420   | NA | 5  | 5  | 2  | 3  | NA |

|              |                                      |    |           |           |     |       |    |    |    |    |    |    |
|--------------|--------------------------------------|----|-----------|-----------|-----|-------|----|----|----|----|----|----|
| Lymph-BNHL   | abedd46c-47b8-4242-adb6-12835400cb3f | 6  | 91004993  | 91007444  | 13  | 2451  | NA | 4  | 2  | 4  | 2  | 1  |
| Lymph-BNHL   | abedd46c-47b8-4242-adb6-12835400cb3f | 6  | 134491760 | 134557456 | 125 | 65696 | 5  | 27 | 9  | 32 | 25 | 27 |
| Lymph-BNHL   | abedd46c-47b8-4242-adb6-12835400cb3f | 7  | 27870895  | 27873652  | 6   | 2757  | NA | NA | NA | 4  | NA | 2  |
| Lymph-BNHL   | abedd46c-47b8-4242-adb6-12835400cb3f | 9  | 1922073   | 1926817   | 7   | 4744  | 1  | NA | 1  | 2  | 1  | 2  |
| Lymph-BNHL   | abedd46c-47b8-4242-adb6-12835400cb3f | 9  | 37406657  | 37407433  | 8   | 776   | NA | 1  | 3  | 2  | 2  | NA |
| Lymph-BNHL   | abedd46c-47b8-4242-adb6-12835400cb3f | 10 | 67838251  | 67850886  | 16  | 12635 | NA | 3  | 3  | NA | 3  | 7  |
| Lymph-BNHL   | abedd46c-47b8-4242-adb6-12835400cb3f | 10 | 67865141  | 67872128  | 11  | 6987  | 2  | 1  | 1  | 1  | 5  | 1  |
| Lymph-BNHL   | abedd46c-47b8-4242-adb6-12835400cb3f | 10 | 67876352  | 67881978  | 7   | 5626  | NA | NA | NA | 4  | 1  | 2  |
| Lymph-BNHL   | abedd46c-47b8-4242-adb6-12835400cb3f | 10 | 67900422  | 67904793  | 7   | 4371  | 2  | NA | NA | 3  | 1  | 1  |
| Lymph-BNHL   | abedd46c-47b8-4242-adb6-12835400cb3f | 12 | 69030164  | 69032629  | 7   | 2465  | 1  | NA | NA | 4  | 2  | NA |
| Lymph-BNHL   | abedd46c-47b8-4242-adb6-12835400cb3f | 12 | 99085196  | 99085379  | 8   | 183   | NA | NA | NA | 3  | 3  | 2  |
| Lymph-BNHL   | abedd46c-47b8-4242-adb6-12835400cb3f | 12 | 122459110 | 122466702 | 19  | 7592  | NA | 3  | 5  | 9  | 1  | 1  |
| Lymph-BNHL   | abedd46c-47b8-4242-adb6-12835400cb3f | 13 | 41155848  | 41156364  | 8   | 516   | NA | NA | 1  | 5  | 1  | 1  |
| Lymph-BNHL   | abedd46c-47b8-4242-adb6-12835400cb3f | 13 | 48542521  | 48542619  | 7   | 98    | NA | NA | NA | 3  | 2  | 2  |
| Lymph-BNHL   | abedd46c-47b8-4242-adb6-12835400cb3f | 14 | 69259033  | 69262125  | 7   | 3092  | 1  | 1  | 2  | NA | 3  | NA |
| Lymph-BNHL   | abedd46c-47b8-4242-adb6-12835400cb3f | 14 | 83712091  | 83714313  | 8   | 2222  | NA | NA | NA | 3  | 2  | 3  |
| Lymph-BNHL   | abedd46c-47b8-4242-adb6-12835400cb3f | 14 | 106051870 | 106072076 | 25  | 20206 | NA | 4  | 12 | 1  | 5  | 3  |
| Lymph-BNHL   | abedd46c-47b8-4242-adb6-12835400cb3f | 14 | 106211015 | 106213328 | 8   | 2313  | NA | 1  | 7  | NA | NA | NA |
| Lymph-BNHL   | abedd46c-47b8-4242-adb6-12835400cb3f | 14 | 106235800 | 106238667 | 8   | 2867  | 1  | 1  | 2  | 1  | 1  | 2  |
| Lymph-BNHL   | abedd46c-47b8-4242-adb6-12835400cb3f | 14 | 106327144 | 106390817 | 85  | 63673 | 5  | 16 | 19 | 22 | 14 | 9  |
| Lymph-BNHL   | abedd46c-47b8-4242-adb6-12835400cb3f | 14 | 106816305 | 106817783 | 12  | 1478  | 1  | NA | 3  | 4  | 3  | 1  |
| Lymph-BNHL   | abedd46c-47b8-4242-adb6-12835400cb3f | 15 | 86233751  | 86235781  | 6   | 2030  | NA | NA | NA | 4  | NA | 2  |
| Lymph-BNHL   | abedd46c-47b8-4242-adb6-12835400cb3f | 16 | 30321517  | 30321823  | 6   | 306   | NA | NA | NA | 2  | 2  | 2  |
| Lymph-BNHL   | abedd46c-47b8-4242-adb6-12835400cb3f | 17 | 56409049  | 56409673  | 6   | 624   | NA | 2  | 4  | NA | NA | NA |
| Lymph-BNHL   | abedd46c-47b8-4242-adb6-12835400cb3f | 20 | 37435442  | 37437190  | 6   | 1748  | 1  | 1  | 4  | NA | NA | NA |
| Lymph-BNHL   | abedd46c-47b8-4242-adb6-12835400cb3f | 21 | 21635903  | 21636419  | 7   | 516   | NA | NA | 1  | 4  | 1  | 1  |
| Lymph-BNHL   | abedd46c-47b8-4242-adb6-12835400cb3f | 22 | 23199038  | 23199373  | 8   | 335   | 2  | NA | 1  | 2  | 2  | 1  |
| Lymph-BNHL   | abedd46c-47b8-4242-adb6-12835400cb3f | 22 | 23222936  | 23284845  | 147 | 61909 | 12 | 27 | 27 | 31 | 28 | 22 |
| Lymph-BNHL   | abedd46c-47b8-4242-adb6-12835400cb3f | X  | 12992939  | 12994393  | 12  | 1454  | NA | 5  | 3  | 2  | 1  | 1  |
| Lymph-BNHL   | abedd46c-47b8-4242-adb6-12835400cb3f | X  | 42802152  | 42802689  | 11  | 537   | NA | 2  | 3  | 2  | 3  | 1  |
| Lymph-BNHL   | abedd46c-47b8-4242-adb6-12835400cb3f | X  | 138167598 | 138168785 | 13  | 1187  | NA | 1  | 2  | 4  | 1  | 5  |
| Panc-AdenoCA | ac02c38e-5fca-4995-b0cc-39b6189976a3 | 6  | 66543925  | 66559860  | 26  | 15935 | 3  | 7  | 16 | NA | NA | NA |
| Panc-AdenoCA | ac02c38e-5fca-4995-b0cc-39b6189976a3 | 7  | 76221381  | 76228415  | 13  | 7034  | 3  | 5  | 5  | NA | NA | NA |
| Panc-AdenoCA | ac02c38e-5fca-4995-b0cc-39b6189976a3 | 7  | 151911292 | 151913639 | 12  | 2347  | 4  | 3  | 4  | NA | NA | 1  |
| Panc-AdenoCA | ac02c38e-5fca-4995-b0cc-39b6189976a3 | 8  | 5379660   | 5383950   | 40  | 4290  | 6  | 13 | 21 | NA | NA | NA |
| Panc-AdenoCA | ac02c38e-5fca-4995-b0cc-39b6189976a3 | 12 | 4548017   | 4551867   | 13  | 3850  | 3  | 2  | 8  | NA | NA | NA |
| Panc-AdenoCA | ac02c38e-5fca-4995-b0cc-39b6189976a3 | 18 | 51044499  | 51045418  | 6   | 919   | NA | 2  | 4  | NA | NA | NA |
| Panc-AdenoCA | ac02c38e-5fca-4995-b0cc-39b6189976a3 | 21 | 41180449  | 41187730  | 15  | 7281  | 1  | 6  | 8  | NA | NA | NA |
| Lymph-BNHL   | ac2c8928-33a2-4aa0-8bc1-cdfa1ca0b56a | 2  | 89159737  | 89165523  | 44  | 5786  | NA | 5  | 7  | 16 | 5  | 11 |
| Lymph-BNHL   | ac2c8928-33a2-4aa0-8bc1-cdfa1ca0b56a | 3  | 60602988  | 60608867  | 8   | 5879  | 3  | NA | 1  | 4  | NA | NA |
| Lymph-BNHL   | ac2c8928-33a2-4aa0-8bc1-cdfa1ca0b56a | 14 | 106325473 | 106328981 | 12  | 3508  | 4  | 1  | 1  | 3  | NA | 3  |
| Lymph-BNHL   | ac2c8928-33a2-4aa0-8bc1-cdfa1ca0b56a | 14 | 106370719 | 106374303 | 8   | 3584  | NA | 1  | 1  | 2  | 1  | 3  |
| Lymph-BNHL   | ac2c8928-33a2-4aa0-8bc1-cdfa1ca0b56a | 14 | 106830023 | 106831496 | 11  | 1473  | 1  | NA | 2  | 4  | 3  | 1  |
| Lymph-BNHL   | ac2c8928-33a2-4aa0-8bc1-cdfa1ca0b56a | 22 | 23223402  | 23235278  | 39  | 11876 | 1  | 6  | 13 | 15 | 2  | 2  |
| Bladder-TCC  | acc629cb-ad03-4cec-9b21-922e4932ef3e | 1  | 1611896   | 1639076   | 29  | 27180 | 9  | 6  | 13 | 1  | NA | NA |
| Bladder-TCC  | acc629cb-ad03-4cec-9b21-922e4932ef3e | 1  | 202770864 | 202777707 | 21  | 6843  | 2  | 9  | 10 | NA | NA | NA |
| Bladder-TCC  | acc629cb-ad03-4cec-9b21-922e4932ef3e | 2  | 161022891 | 161025127 | 6   | 2236  | 1  | 4  | 1  | NA | NA | NA |
| Bladder-TCC  | acc629cb-ad03-4cec-9b21-922e4932ef3e | 4  | 128221887 | 128224267 | 8   | 2380  | 1  | 1  | 6  | NA | NA | NA |
| Bladder-TCC  | acc629cb-ad03-4cec-9b21-922e4932ef3e | 4  | 154119552 | 154120370 | 7   | 818   | 1  | 3  | 3  | NA | NA | NA |
| Bladder-TCC  | acc629cb-ad03-4cec-9b21-922e4932ef3e | 5  | 176933076 | 176934269 | 6   | 1193  | NA | 2  | 4  | NA | NA | NA |
| Bladder-TCC  | acc629cb-ad03-4cec-9b21-922e4932ef3e | 6  | 40232939  | 40235659  | 9   | 2720  | NA | 5  | 4  | NA | NA | NA |
| Bladder-TCC  | acc629cb-ad03-4cec-9b21-922e4932ef3e | 6  | 53398610  | 53403822  | 9   | 5212  | NA | 6  | 3  | NA | NA | NA |
| Bladder-TCC  | acc629cb-ad03-4cec-9b21-922e4932ef3e | 6  | 74957793  | 74958262  | 7   | 469   | 1  | 3  | 3  | NA | NA | NA |
| Bladder-TCC  | acc629cb-ad03-4cec-9b21-922e4932ef3e | 7  | 47778006  | 47780585  | 18  | 2579  | NA | 3  | 15 | NA | NA | NA |
| Bladder-TCC  | acc629cb-ad03-4cec-9b21-922e4932ef3e | 7  | 120159380 | 120160593 | 7   | 1213  | NA | 5  | 2  | NA | NA | NA |
| Bladder-TCC  | acc629cb-ad03-4cec-9b21-922e4932ef3e | 7  | 123493716 | 123496613 | 12  | 2897  | 3  | 4  | 5  | NA | NA | NA |
| Bladder-TCC  | acc629cb-ad03-4cec-9b21-922e4932ef3e | 7  | 128542280 | 128544957 | 8   | 2677  | 2  | 3  | 3  | NA | NA | NA |
| Bladder-TCC  | acc629cb-ad03-4cec-9b21-922e4932ef3e | 8  | 92983201  | 92984996  | 7   | 1795  | 2  | 4  | 1  | NA | NA | NA |
| Bladder-TCC  | acc629cb-ad03-4cec-9b21-922e4932ef3e | 9  | 4076994   | 4080515   | 6   | 3521  | NA | NA | 6  | NA | NA | NA |
| Bladder-TCC  | acc629cb-ad03-4cec-9b21-922e4932ef3e | 9  | 15842385  | 15844511  | 9   | 2126  | NA | NA | 9  | NA | NA | NA |

|               |                                      |    |           |           |    |       |    |    |    |    |    |    |
|---------------|--------------------------------------|----|-----------|-----------|----|-------|----|----|----|----|----|----|
| Bladder-TCC   | acc629cb-ad03-4cec-9b21-922e4932ef3e | 9  | 15857279  | 15859522  | 7  | 2243  | 1  | 2  | 4  | NA | NA | NA |
| Bladder-TCC   | acc629cb-ad03-4cec-9b21-922e4932ef3e | 11 | 66518750  | 66519575  | 6  | 825   | NA | 4  | 2  | NA | NA | NA |
| Bladder-TCC   | acc629cb-ad03-4cec-9b21-922e4932ef3e | 12 | 47978327  | 47979844  | 6  | 1517  | 1  | 4  | 1  | NA | NA | NA |
| Bladder-TCC   | acc629cb-ad03-4cec-9b21-922e4932ef3e | 14 | 35477819  | 35481094  | 6  | 3275  | NA | 3  | 3  | NA | NA | NA |
| Bladder-TCC   | acc629cb-ad03-4cec-9b21-922e4932ef3e | 14 | 64789379  | 64793108  | 8  | 3729  | NA | 6  | 2  | NA | NA | NA |
| Bladder-TCC   | acc629cb-ad03-4cec-9b21-922e4932ef3e | 15 | 59137257  | 59140730  | 9  | 3473  | NA | 6  | 3  | NA | NA | NA |
| Bladder-TCC   | acc629cb-ad03-4cec-9b21-922e4932ef3e | 16 | 3024681   | 3027773   | 11 | 3092  | 1  | 4  | 5  | NA | NA | 1  |
| Bladder-TCC   | acc629cb-ad03-4cec-9b21-922e4932ef3e | 16 | 58262763  | 58267958  | 19 | 5195  | 1  | 10 | 8  | NA | NA | NA |
| Bladder-TCC   | acc629cb-ad03-4cec-9b21-922e4932ef3e | 17 | 37929975  | 37932335  | 7  | 2360  | NA | 4  | 3  | NA | NA | NA |
| Bladder-TCC   | acc629cb-ad03-4cec-9b21-922e4932ef3e | 17 | 60586037  | 60590028  | 7  | 3991  | NA | 3  | 4  | NA | NA | NA |
| Bladder-TCC   | acc629cb-ad03-4cec-9b21-922e4932ef3e | 17 | 60595691  | 60599440  | 11 | 3749  | 3  | 5  | 3  | NA | NA | NA |
| Bladder-TCC   | acc629cb-ad03-4cec-9b21-922e4932ef3e | 19 | 21984145  | 21985520  | 9  | 1375  | 2  | 3  | 4  | NA | NA | NA |
| Bladder-TCC   | acc629cb-ad03-4cec-9b21-922e4932ef3e | 20 | 47706040  | 47709677  | 7  | 3637  | 1  | NA | 5  | NA | 1  | NA |
| Bladder-TCC   | acc629cb-ad03-4cec-9b21-922e4932ef3e | X  | 96111869  | 96113474  | 6  | 1605  | NA | 4  | 2  | NA | NA | NA |
| Ovary-AdenoCA | acd510de-b732-4a1a-8b72-6d22e763540b | 7  | 118961636 | 118962829 | 10 | 1193  | 4  | 6  | NA | NA | NA | NA |
| Lung-SCC      | ad41f1f3-e38e-4418-9c16-52bca5719f39 | 2  | 199229909 | 199235091 | 9  | 5182  | 1  | 3  | 5  | NA | NA | NA |
| Lung-SCC      | ad41f1f3-e38e-4418-9c16-52bca5719f39 | 2  | 214139848 | 214146290 | 8  | 6442  | NA | 7  | 1  | NA | NA | NA |
| Lung-SCC      | ad41f1f3-e38e-4418-9c16-52bca5719f39 | 2  | 227715908 | 227721767 | 8  | 5859  | 1  | 6  | 1  | NA | NA | NA |
| Lung-SCC      | ad41f1f3-e38e-4418-9c16-52bca5719f39 | 5  | 178840522 | 178841904 | 16 | 1382  | 1  | 7  | 8  | NA | NA | NA |
| Lung-SCC      | ad41f1f3-e38e-4418-9c16-52bca5719f39 | 8  | 35972202  | 35976247  | 9  | 4045  | 1  | 6  | 2  | NA | NA | NA |
| Eso-AdenoCa   | ad4aa4dc-bea4-4f4a-8b1b-8f361112f84f | 7  | 124883040 | 124883686 | 7  | 646   | 1  | 2  | 4  | NA | NA | NA |
| Eso-AdenoCa   | ad4aa4dc-bea4-4f4a-8b1b-8f361112f84f | 7  | 127581181 | 127582863 | 8  | 1682  | NA | 2  | 6  | NA | NA | NA |
| Lymph-CLL     | ad92f17f-11e6-49bd-9835-6b2f47053485 | 2  | 89159407  | 89165368  | 18 | 5961  | NA | 5  | NA | 6  | 3  | 4  |
| Lymph-CLL     | ad92f17f-11e6-49bd-9835-6b2f47053485 | 14 | 106326619 | 106329454 | 27 | 2835  | 1  | 1  | 8  | 9  | 3  | 5  |
| Kidney-RCC    | ad9455e9-7147-489e-9b1f-3540c457c260 | 16 | 80973714  | 80973721  | 6  | 7     | NA | NA | 3  | 1  | NA | 2  |
| Liver-HCC     | adfbb82-c622-11e3-bf01-24c6515278c0  | 14 | 56677852  | 56680459  | 8  | 2607  | 2  | 4  | 1  | 1  | NA | NA |
| Liver-HCC     | adfbb82-c622-11e3-bf01-24c6515278c0  | 17 | 16003025  | 16004446  | 6  | 1421  | NA | 4  | 2  | NA | NA | NA |
| Ovary-AdenoCA | ae82fead-2671-4335-a342-67bb69935ad9 | 2  | 236585390 | 236588311 | 19 | 2921  | 2  | 9  | 7  | 1  | NA | NA |
| Ovary-AdenoCA | ae82fead-2671-4335-a342-67bb69935ad9 | 2  | 239344041 | 239345263 | 7  | 1222  | 3  | 4  | NA | NA | NA | NA |
| Ovary-AdenoCA | ae82fead-2671-4335-a342-67bb69935ad9 | 8  | 129650599 | 129667818 | 25 | 17219 | NA | 16 | 9  | NA | NA | NA |
| Ovary-AdenoCA | ae82fead-2671-4335-a342-67bb69935ad9 | 11 | 86593064  | 86594124  | 12 | 1060  | 3  | 4  | 5  | NA | NA | NA |
| Ovary-AdenoCA | ae82fead-2671-4335-a342-67bb69935ad9 | 13 | 92246911  | 92251366  | 13 | 4455  | 3  | 5  | 5  | NA | NA | NA |
| Ovary-AdenoCA | ae82fead-2671-4335-a342-67bb69935ad9 | 17 | 30987004  | 30987918  | 7  | 914   | 2  | 4  | 1  | NA | NA | NA |
| Liver-HCC     | af2cbdb6-c622-11e3-bf01-24c6515278c0 | 1  | 243034576 | 243039521 | 8  | 4945  | NA | 3  | 2  | 1  | 2  | NA |
| Panc-AdenoCA  | af9cfac8-7fbc-49cb-aeca-8d68aea57994 | 1  | 113937836 | 113943591 | 11 | 5755  | NA | 6  | 5  | NA | NA | NA |
| Panc-AdenoCA  | af9cfac8-7fbc-49cb-aeca-8d68aea57994 | 14 | 32442485  | 32444186  | 6  | 1701  | 1  | NA | 5  | NA | NA | NA |
| Panc-AdenoCA  | af9cfac8-7fbc-49cb-aeca-8d68aea57994 | 17 | 59987467  | 59988147  | 8  | 680   | NA | 5  | 3  | NA | NA | NA |
| Panc-AdenoCA  | af9cfac8-7fbc-49cb-aeca-8d68aea57994 | 19 | 28068666  | 28069573  | 6  | 907   | NA | 3  | 3  | NA | NA | NA |
| Panc-AdenoCA  | af9cfac8-7fbc-49cb-aeca-8d68aea57994 | 19 | 28123934  | 28128376  | 19 | 4442  | 1  | 5  | 13 | NA | NA | NA |
| Panc-AdenoCA  | af9cfac8-7fbc-49cb-aeca-8d68aea57994 | 19 | 29968906  | 29978247  | 13 | 9341  | 2  | 4  | 7  | NA | NA | NA |
| Panc-AdenoCA  | af9cfac8-7fbc-49cb-aeca-8d68aea57994 | 19 | 30033876  | 30034595  | 17 | 719   | 6  | 3  | 8  | NA | NA | NA |
| Panc-AdenoCA  | af9cfac8-7fbc-49cb-aeca-8d68aea57994 | 19 | 30695591  | 30696773  | 16 | 1182  | 6  | 7  | 2  | 1  | NA | NA |
| Panc-AdenoCA  | af9cfac8-7fbc-49cb-aeca-8d68aea57994 | 19 | 31758564  | 31764335  | 8  | 5771  | 3  | 1  | 1  | 1  | NA | 2  |
| Panc-AdenoCA  | af9cfac8-7fbc-49cb-aeca-8d68aea57994 | 19 | 33109863  | 33119848  | 16 | 9985  | 6  | 1  | 8  | NA | NA | 1  |
| Bone-Leiomyo  | afee5b10-3dff-4e50-9575-bc9fe20c5dea | 2  | 26698171  | 26698649  | 7  | 478   | 1  | NA | 6  | NA | NA | NA |
| Bone-Leiomyo  | afee5b10-3dff-4e50-9575-bc9fe20c5dea | 2  | 26724562  | 26726293  | 8  | 1731  | NA | NA | 8  | NA | NA | NA |
| Bone-Leiomyo  | afee5b10-3dff-4e50-9575-bc9fe20c5dea | 2  | 41245061  | 41246938  | 8  | 1877  | NA | 6  | 2  | NA | NA | NA |
| Bone-Leiomyo  | afee5b10-3dff-4e50-9575-bc9fe20c5dea | 2  | 60743436  | 60747890  | 9  | 4454  | 1  | 2  | 6  | NA | NA | NA |
| Bone-Leiomyo  | afee5b10-3dff-4e50-9575-bc9fe20c5dea | 2  | 180863924 | 180873362 | 11 | 9438  | 1  | 6  | 4  | NA | NA | NA |
| Bone-Leiomyo  | afee5b10-3dff-4e50-9575-bc9fe20c5dea | 4  | 55760548  | 55765327  | 7  | 4779  | NA | NA | 7  | NA | NA | NA |
| Bone-Leiomyo  | afee5b10-3dff-4e50-9575-bc9fe20c5dea | 6  | 103914468 | 103919444 | 6  | 4976  | 1  | NA | 1  | 2  | NA | 2  |
| Bone-Leiomyo  | afee5b10-3dff-4e50-9575-bc9fe20c5dea | 12 | 4751350   | 4752528   | 14 | 1178  | 2  | 3  | 9  | NA | NA | NA |
| Bone-Leiomyo  | afee5b10-3dff-4e50-9575-bc9fe20c5dea | 12 | 107146101 | 107156387 | 13 | 10286 | 1  | NA | 12 | NA | NA | NA |
| Bone-Leiomyo  | afee5b10-3dff-4e50-9575-bc9fe20c5dea | 12 | 118249829 | 118254940 | 9  | 5111  | 1  | 2  | 5  | 1  | NA | NA |
| Bone-Leiomyo  | afee5b10-3dff-4e50-9575-bc9fe20c5dea | 12 | 121510417 | 121512030 | 9  | 1613  | 1  | 3  | 5  | NA | NA | NA |
| Bone-Leiomyo  | afee5b10-3dff-4e50-9575-bc9fe20c5dea | 12 | 121632875 | 121633391 | 8  | 516   | NA | NA | 5  | 1  | NA | 2  |
| Bone-Leiomyo  | afee5b10-3dff-4e50-9575-bc9fe20c5dea | 12 | 129438950 | 129441544 | 7  | 2594  | 1  | 1  | 5  | NA | NA | NA |
| Bone-Leiomyo  | afee5b10-3dff-4e50-9575-bc9fe20c5dea | 12 | 131906156 | 131915567 | 15 | 9411  | 5  | 2  | 8  | NA | NA | NA |
| Bone-Leiomyo  | afee5b10-3dff-4e50-9575-bc9fe20c5dea | 14 | 25998263  | 26002683  | 13 | 4420  | 2  | 5  | 6  | NA | NA | NA |
| Bone-Leiomyo  | afee5b10-3dff-4e50-9575-bc9fe20c5dea | 15 | 91954296  | 91955063  | 8  | 767   | NA | 1  | 7  | NA | NA | NA |

|                |                                      |    |           |           |    |       |    |    |    |    |    |    |
|----------------|--------------------------------------|----|-----------|-----------|----|-------|----|----|----|----|----|----|
| Skin-Melanoma  | affa4ef4-02ec-40f1-b6a2-739f8bf2afa9 | 8  | 34836999  | 34838322  | 11 | 1323  | 2  | 7  | 2  | NA | NA | NA |
| Skin-Melanoma  | affa4ef4-02ec-40f1-b6a2-739f8bf2afa9 | 8  | 138208867 | 138211027 | 12 | 2160  | NA | 7  | 4  | NA | 1  | NA |
| Skin-Melanoma  | affa4ef4-02ec-40f1-b6a2-739f8bf2afa9 | 8  | 141016919 | 141018079 | 10 | 1160  | 1  | 6  | 3  | NA | NA | NA |
| Eso-AdenoCa    | b02b4bba-6e66-44fb-a48f-38c309aaaa5  | 2  | 23366685  | 23367899  | 6  | 1214  | NA | 1  | 5  | NA | NA | NA |
| Eso-AdenoCa    | b02b4bba-6e66-44fb-a48f-38c309aaaa5  | 2  | 157002233 | 157004707 | 7  | 2474  | 1  | 3  | 3  | NA | NA | NA |
| Eso-AdenoCa    | b02b4bba-6e66-44fb-a48f-38c309aaaa5  | 2  | 186106999 | 186111741 | 7  | 4742  | 2  | 1  | 3  | NA | 1  | NA |
| Eso-AdenoCa    | b02b4bba-6e66-44fb-a48f-38c309aaaa5  | 2  | 205951183 | 205955608 | 7  | 4425  | 1  | 4  | 2  | NA | NA | NA |
| Eso-AdenoCa    | b02b4bba-6e66-44fb-a48f-38c309aaaa5  | 5  | 32856957  | 32860205  | 7  | 3248  | NA | 5  | 2  | NA | NA | NA |
| Eso-AdenoCa    | b02b4bba-6e66-44fb-a48f-38c309aaaa5  | 18 | 24956115  | 24960311  | 17 | 4196  | NA | NA | 16 | 1  | NA | NA |
| Liver-HCC      | b070af2a-c622-11e3-bf01-24c6515278c0 | 4  | 46136817  | 46138368  | 36 | 1551  | 2  | 14 | 19 | 1  | NA | NA |
| Liver-HCC      | b070af2a-c622-11e3-bf01-24c6515278c0 | 4  | 58842633  | 58843631  | 14 | 998   | NA | 4  | 10 | NA | NA | NA |
| Liver-HCC      | b070af2a-c622-11e3-bf01-24c6515278c0 | 5  | 64503620  | 64506440  | 10 | 2820  | 1  | 4  | 5  | NA | NA | NA |
| Liver-HCC      | b070af2a-c622-11e3-bf01-24c6515278c0 | 5  | 95076741  | 95078175  | 18 | 1434  | 2  | 11 | 5  | NA | NA | NA |
| Liver-HCC      | b070af2a-c622-11e3-bf01-24c6515278c0 | 8  | 127506667 | 127506825 | 6  | 158   | 1  | 4  | 1  | NA | NA | NA |
| Liver-HCC      | b070af2a-c622-11e3-bf01-24c6515278c0 | 10 | 53554687  | 53563393  | 12 | 8706  | 1  | 3  | 8  | NA | NA | NA |
| Liver-HCC      | b070af2a-c622-11e3-bf01-24c6515278c0 | 11 | 65101927  | 65103505  | 7  | 1578  | 1  | 3  | 3  | NA | NA | NA |
| Liver-HCC      | b070af2a-c622-11e3-bf01-24c6515278c0 | 15 | 63642548  | 63642929  | 11 | 381   | NA | 4  | 7  | NA | NA | NA |
| Liver-HCC      | b070af2a-c622-11e3-bf01-24c6515278c0 | 15 | 74824636  | 74828507  | 14 | 3871  | 1  | 4  | 9  | NA | NA | NA |
| Liver-HCC      | b070af2a-c622-11e3-bf01-24c6515278c0 | X  | 63794799  | 63796137  | 6  | 1338  | NA | NA | NA | 1  | 5  | NA |
| Liver-HCC      | b070af2a-c622-11e3-bf01-24c6515278c0 | X  | 71366767  | 71373574  | 8  | 6807  | NA | 1  | 1  | 3  | 3  | NA |
| Lymph-BNHL     | b2190e26-1809-4aba-9f45-07c2edb3b4a4 | 2  | 89158896  | 89160400  | 22 | 1504  | 1  | 3  | 2  | 8  | 5  | 3  |
| Lymph-BNHL     | b2190e26-1809-4aba-9f45-07c2edb3b4a4 | 4  | 137504019 | 137507007 | 6  | 2988  | NA | NA | 2  | 2  | NA | 2  |
| Lymph-BNHL     | b2190e26-1809-4aba-9f45-07c2edb3b4a4 | 5  | 24131230  | 24136205  | 6  | 4975  | NA | NA | 1  | 1  | NA | 4  |
| Lymph-BNHL     | b2190e26-1809-4aba-9f45-07c2edb3b4a4 | 6  | 71895633  | 71898635  | 7  | 3002  | NA | NA | 1  | 3  | 1  | 2  |
| Lymph-BNHL     | b2190e26-1809-4aba-9f45-07c2edb3b4a4 | 8  | 15944820  | 15953463  | 11 | 8643  | NA | NA | 2  | 4  | 4  | 1  |
| Lymph-BNHL     | b2190e26-1809-4aba-9f45-07c2edb3b4a4 | 8  | 128748945 | 128752791 | 41 | 3846  | 5  | 11 | 15 | 4  | 1  | 5  |
| Lymph-BNHL     | b2190e26-1809-4aba-9f45-07c2edb3b4a4 | 14 | 48109792  | 48113500  | 7  | 3708  | 1  | 1  | 1  | 1  | 2  | 1  |
| Lymph-BNHL     | b2190e26-1809-4aba-9f45-07c2edb3b4a4 | 14 | 106325025 | 106330380 | 60 | 5355  | 3  | 13 | 11 | 9  | 10 | 14 |
| Panc-Endocrine | b27b569a-2c79-4453-8a2d-41fd0b4dd28d | 8  | 16537228  | 16537468  | 7  | 240   | NA | NA | 7  | NA | NA | NA |
| Panc-Endocrine | b27b569a-2c79-4453-8a2d-41fd0b4dd28d | 8  | 110047239 | 110048108 | 8  | 869   | NA | NA | 8  | NA | NA | NA |
| Panc-Endocrine | b27b569a-2c79-4453-8a2d-41fd0b4dd28d | 8  | 110066664 | 110071408 | 27 | 4744  | NA | NA | 27 | NA | NA | NA |
| Panc-Endocrine | b27b569a-2c79-4453-8a2d-41fd0b4dd28d | 8  | 111699021 | 111700080 | 14 | 1059  | NA | 4  | 10 | NA | NA | NA |
| Panc-Endocrine | b27b569a-2c79-4453-8a2d-41fd0b4dd28d | 8  | 112146997 | 112156723 | 28 | 9726  | 1  | 11 | 13 | NA | 1  | 2  |
| Panc-Endocrine | b27b569a-2c79-4453-8a2d-41fd0b4dd28d | 8  | 118123598 | 118138770 | 18 | 15172 | NA | NA | 18 | NA | NA | NA |
| Panc-Endocrine | b27b569a-2c79-4453-8a2d-41fd0b4dd28d | 8  | 128597929 | 128600871 | 41 | 2942  | NA | 7  | 34 | NA | NA | NA |
| Breast-AdenoCa | b27d75ba-5989-4200-bfe9-f1b7d7cf8008 | 6  | 132134922 | 132139876 | 13 | 4954  | 3  | 3  | 6  | NA | NA | 1  |
| Breast-AdenoCa | b27d75ba-5989-4200-bfe9-f1b7d7cf8008 | 8  | 128381194 | 128386381 | 7  | 5187  | NA | NA | 7  | NA | NA | NA |
| CNS-GBM        | b2d17671-d2e1-4c97-8b01-a976d5abe1d6 | 2  | 350936    | 355688    | 6  | 4752  | 1  | 1  | 2  | 1  | 1  | NA |
| CNS-GBM        | b2d17671-d2e1-4c97-8b01-a976d5abe1d6 | 13 | 92988926  | 92990115  | 7  | 1189  | NA | 4  | 3  | NA | NA | NA |
| Kidney-RCC     | b30df8b-8288-4e5a-afc2-3d5bd7bfa26c  | 4  | 162519872 | 162523881 | 6  | 4009  | 1  | 1  | 1  | 2  | NA | 1  |
| Liver-HCC      | b32449c0-c622-11e3-bf01-24c6515278c0 | X  | 46555018  | 46556089  | 6  | 1071  | 2  | NA | 3  | 1  | NA | NA |
| Prost-AdenoCA  | b33978c6-a855-4f9d-a0b0-d79453b9de41 | 1  | 74431927  | 74433565  | 7  | 1638  | 1  | NA | 1  | 3  | 2  | NA |
| Prost-AdenoCA  | b33978c6-a855-4f9d-a0b0-d79453b9de41 | 1  | 170073426 | 170076840 | 7  | 3414  | NA | NA | 3  | 2  | 1  | 1  |
| Prost-AdenoCA  | b33978c6-a855-4f9d-a0b0-d79453b9de41 | 1  | 170729442 | 170732170 | 7  | 2728  | NA | 3  | NA | 3  | NA | 1  |
| Prost-AdenoCA  | b33978c6-a855-4f9d-a0b0-d79453b9de41 | 1  | 191026759 | 191032671 | 9  | 5912  | 2  | 2  | 3  | 1  | NA | 1  |
| Prost-AdenoCA  | b33978c6-a855-4f9d-a0b0-d79453b9de41 | 1  | 195637953 | 195641002 | 7  | 3049  | 1  | NA | 2  | NA | 1  | 3  |
| Prost-AdenoCA  | b33978c6-a855-4f9d-a0b0-d79453b9de41 | 2  | 18344086  | 18346529  | 7  | 2443  | NA | NA | 2  | 2  | 2  | 1  |
| Prost-AdenoCA  | b33978c6-a855-4f9d-a0b0-d79453b9de41 | 2  | 147402870 | 147405108 | 7  | 2238  | NA | 2  | 1  | 4  | NA | NA |
| Prost-AdenoCA  | b33978c6-a855-4f9d-a0b0-d79453b9de41 | 2  | 157926243 | 157928519 | 8  | 2276  | NA | NA | 1  | 3  | 1  | 3  |
| Prost-AdenoCA  | b33978c6-a855-4f9d-a0b0-d79453b9de41 | 3  | 39780707  | 39783325  | 7  | 2618  | 1  | NA | 2  | 2  | NA | 2  |
| Prost-AdenoCA  | b33978c6-a855-4f9d-a0b0-d79453b9de41 | 3  | 89125576  | 89126968  | 7  | 1392  | 1  | 1  | 2  | 1  | 2  | NA |
| Prost-AdenoCA  | b33978c6-a855-4f9d-a0b0-d79453b9de41 | 3  | 105027215 | 105030518 | 8  | 3303  | 1  | NA | 1  | 1  | 4  | 1  |
| Prost-AdenoCA  | b33978c6-a855-4f9d-a0b0-d79453b9de41 | 4  | 18497855  | 18501177  | 8  | 3322  | NA | 1  | 4  | 1  | 2  | NA |
| Prost-AdenoCA  | b33978c6-a855-4f9d-a0b0-d79453b9de41 | 4  | 68134600  | 68137448  | 7  | 2848  | NA | NA | 2  | 4  | NA | 1  |
| Prost-AdenoCA  | b33978c6-a855-4f9d-a0b0-d79453b9de41 | 4  | 83074948  | 83078982  | 8  | 4034  | 1  | 1  | 3  | NA | 2  | 1  |
| Prost-AdenoCA  | b33978c6-a855-4f9d-a0b0-d79453b9de41 | 4  | 104767127 | 104772594 | 7  | 5467  | 4  | NA | 2  | 1  | NA | NA |
| Prost-AdenoCA  | b33978c6-a855-4f9d-a0b0-d79453b9de41 | 5  | 122665708 | 122668177 | 6  | 2469  | NA | 1  | 1  | 3  | NA | 1  |
| Prost-AdenoCA  | b33978c6-a855-4f9d-a0b0-d79453b9de41 | 5  | 143875334 | 143878868 | 8  | 3534  | 1  | 1  | 1  | 2  | NA | 3  |
| Prost-AdenoCA  | b33978c6-a855-4f9d-a0b0-d79453b9de41 | 6  | 66576395  | 66577357  | 6  | 962   | NA | NA | 3  | 3  | NA | NA |
| Prost-AdenoCA  | b33978c6-a855-4f9d-a0b0-d79453b9de41 | 6  | 124560938 | 124565266 | 8  | 4328  | 1  | NA | 2  | 3  | 1  | 1  |

|                |                                      |    |           |           |    |       |    |    |    |    |    |    |
|----------------|--------------------------------------|----|-----------|-----------|----|-------|----|----|----|----|----|----|
| Prost-AdenoCA  | b33978c6-a855-4f9d-a0b0-d79453b9de41 | 6  | 126930284 | 126932794 | 9  | 2510  | 1  | 1  | 2  | 3  | 1  | 1  |
| Prost-AdenoCA  | b33978c6-a855-4f9d-a0b0-d79453b9de41 | 7  | 34499319  | 34502408  | 7  | 3089  | NA | 1  | 3  | 1  | 1  | 1  |
| Prost-AdenoCA  | b33978c6-a855-4f9d-a0b0-d79453b9de41 | 7  | 93117566  | 93120747  | 9  | 3181  | NA | NA | 2  | 7  | NA | NA |
| Prost-AdenoCA  | b33978c6-a855-4f9d-a0b0-d79453b9de41 | 8  | 49266137  | 49269881  | 7  | 3744  | 1  | NA | NA | 4  | 1  | 1  |
| Prost-AdenoCA  | b33978c6-a855-4f9d-a0b0-d79453b9de41 | 8  | 100602636 | 100605277 | 7  | 2641  | 1  | 1  | NA | 3  | 1  | 1  |
| Prost-AdenoCA  | b33978c6-a855-4f9d-a0b0-d79453b9de41 | 8  | 128056825 | 128058214 | 12 | 1389  | NA | NA | 1  | 8  | 1  | 2  |
| Prost-AdenoCA  | b33978c6-a855-4f9d-a0b0-d79453b9de41 | 9  | 12865371  | 12868085  | 6  | 2714  | NA | NA | 2  | 2  | 2  | NA |
| Prost-AdenoCA  | b33978c6-a855-4f9d-a0b0-d79453b9de41 | 10 | 59477740  | 59480830  | 7  | 3090  | NA | 1  | 2  | 2  | NA | 2  |
| Prost-AdenoCA  | b33978c6-a855-4f9d-a0b0-d79453b9de41 | 11 | 29686757  | 29689799  | 6  | 3042  | NA | NA | 1  | 3  | NA | 2  |
| Prost-AdenoCA  | b33978c6-a855-4f9d-a0b0-d79453b9de41 | 11 | 50427681  | 50434083  | 8  | 6402  | NA | 1  | 2  | 3  | 1  | 1  |
| Prost-AdenoCA  | b33978c6-a855-4f9d-a0b0-d79453b9de41 | 12 | 45178656  | 45179832  | 6  | 1176  | NA | 1  | 1  | 3  | 1  | NA |
| Prost-AdenoCA  | b33978c6-a855-4f9d-a0b0-d79453b9de41 | 12 | 88833396  | 88835936  | 7  | 2540  | NA | 1  | 2  | 2  | 1  | 1  |
| Prost-AdenoCA  | b33978c6-a855-4f9d-a0b0-d79453b9de41 | 13 | 57341784  | 57343002  | 6  | 1218  | NA | 2  | 2  | 2  | NA | NA |
| Prost-AdenoCA  | b33978c6-a855-4f9d-a0b0-d79453b9de41 | 13 | 92486185  | 92487194  | 7  | 1009  | 1  | NA | 1  | 3  | NA | 2  |
| Prost-AdenoCA  | b33978c6-a855-4f9d-a0b0-d79453b9de41 | 13 | 104835756 | 104837392 | 7  | 1636  | NA | 1  | NA | 4  | 1  | 1  |
| Prost-AdenoCA  | b33978c6-a855-4f9d-a0b0-d79453b9de41 | 14 | 60132913  | 60135718  | 7  | 2805  | 1  | 1  | 2  | NA | 1  | 2  |
| Prost-AdenoCA  | b33978c6-a855-4f9d-a0b0-d79453b9de41 | 14 | 86368856  | 86370853  | 7  | 1997  | NA | NA | 3  | 1  | 2  | 1  |
| Prost-AdenoCA  | b33978c6-a855-4f9d-a0b0-d79453b9de41 | 18 | 30551209  | 30552528  | 6  | 1319  | 1  | NA | 2  | 1  | NA | 2  |
| Prost-AdenoCA  | b33978c6-a855-4f9d-a0b0-d79453b9de41 | 20 | 10800601  | 10802623  | 7  | 2022  | NA | 1  | 1  | 4  | NA | 1  |
| Prost-AdenoCA  | b33978c6-a855-4f9d-a0b0-d79453b9de41 | 21 | 18527833  | 18529713  | 6  | 1880  | NA | NA | 1  | 4  | 1  | NA |
| Prost-AdenoCA  | b33978c6-a855-4f9d-a0b0-d79453b9de41 | X  | 21233703  | 21238304  | 6  | 4601  | 1  | NA | NA | 3  | 1  | 1  |
| Prost-AdenoCA  | b33978c6-a855-4f9d-a0b0-d79453b9de41 | X  | 66195647  | 66197804  | 7  | 2157  | 1  | 2  | 1  | 2  | 1  | NA |
| Prost-AdenoCA  | b33978c6-a855-4f9d-a0b0-d79453b9de41 | Y  | 21955355  | 21958277  | 7  | 2922  | NA | NA | 1  | 4  | 2  | NA |
| Prost-AdenoCA  | b33978c6-a855-4f9d-a0b0-d79453b9de41 | Y  | 23047962  | 23051209  | 8  | 3247  | 1  | 1  | 2  | 2  | 1  | 1  |
| Prost-AdenoCA  | b33b7c8f-0b0d-4009-88a7-48e9d9cae6cb | X  | 66193142  | 66197372  | 7  | 4230  | NA | 3  | 1  | 1  | 2  | NA |
| Skin-Melanoma  | b35d9a68-29f4-49ab-b83e-b5151679e3af | 1  | 77978536  | 77978893  | 20 | 357   | NA | NA | 20 | NA | NA | NA |
| Skin-Melanoma  | b35d9a68-29f4-49ab-b83e-b5151679e3af | 3  | 155050285 | 155051352 | 6  | 1067  | 2  | 1  | 3  | NA | NA | NA |
| Skin-Melanoma  | b35d9a68-29f4-49ab-b83e-b5151679e3af | 4  | 44243313  | 44245915  | 25 | 2602  | 2  | 6  | 17 | NA | NA | NA |
| Skin-Melanoma  | b35d9a68-29f4-49ab-b83e-b5151679e3af | 4  | 45108797  | 45113286  | 11 | 4489  | NA | 4  | 7  | NA | NA | NA |
| Skin-Melanoma  | b35d9a68-29f4-49ab-b83e-b5151679e3af | 5  | 925093    | 927398    | 6  | 2305  | 1  | 2  | 3  | NA | NA | NA |
| Skin-Melanoma  | b35d9a68-29f4-49ab-b83e-b5151679e3af | 5  | 3328950   | 3332304   | 11 | 3354  | 1  | 3  | 7  | NA | NA | NA |
| Skin-Melanoma  | b35d9a68-29f4-49ab-b83e-b5151679e3af | 5  | 42033141  | 42035543  | 12 | 2402  | 1  | 2  | 9  | NA | NA | NA |
| Skin-Melanoma  | b35d9a68-29f4-49ab-b83e-b5151679e3af | 5  | 42748130  | 42751006  | 8  | 2876  | NA | NA | 8  | NA | NA | NA |
| Skin-Melanoma  | b35d9a68-29f4-49ab-b83e-b5151679e3af | 5  | 43999210  | 44028149  | 32 | 28939 | 3  | 5  | 23 | 1  | NA | NA |
| Skin-Melanoma  | b35d9a68-29f4-49ab-b83e-b5151679e3af | 5  | 115424056 | 115433842 | 27 | 9786  | NA | NA | 27 | NA | NA | NA |
| Skin-Melanoma  | b35d9a68-29f4-49ab-b83e-b5151679e3af | 5  | 130415298 | 130422478 | 12 | 7180  | 1  | NA | 11 | NA | NA | NA |
| Skin-Melanoma  | b35d9a68-29f4-49ab-b83e-b5151679e3af | 7  | 8742496   | 8742978   | 8  | 482   | NA | 2  | 6  | NA | NA | NA |
| Skin-Melanoma  | b35d9a68-29f4-49ab-b83e-b5151679e3af | 7  | 9657331   | 9658701   | 8  | 1370  | 3  | NA | 3  | 2  | NA | NA |
| Skin-Melanoma  | b35d9a68-29f4-49ab-b83e-b5151679e3af | 7  | 14415798  | 14421288  | 8  | 5490  | 1  | 1  | 3  | NA | NA | 3  |
| Skin-Melanoma  | b35d9a68-29f4-49ab-b83e-b5151679e3af | 7  | 24052949  | 24057469  | 11 | 4520  | 3  | 4  | 4  | NA | NA | NA |
| Skin-Melanoma  | b35d9a68-29f4-49ab-b83e-b5151679e3af | 7  | 80286094  | 80289590  | 12 | 3496  | NA | 7  | 5  | NA | NA | NA |
| Skin-Melanoma  | b35d9a68-29f4-49ab-b83e-b5151679e3af | 7  | 86964719  | 86965738  | 9  | 1019  | NA | 1  | 8  | NA | NA | NA |
| Skin-Melanoma  | b35d9a68-29f4-49ab-b83e-b5151679e3af | 7  | 157175300 | 157181264 | 11 | 5964  | NA | NA | 11 | NA | NA | NA |
| Skin-Melanoma  | b35d9a68-29f4-49ab-b83e-b5151679e3af | 8  | 58025536  | 58030639  | 7  | 5103  | NA | 1  | 1  | 2  | 2  | 1  |
| Skin-Melanoma  | b35d9a68-29f4-49ab-b83e-b5151679e3af | 11 | 58017709  | 58018652  | 8  | 943   | NA | 4  | 4  | NA | NA | NA |
| Skin-Melanoma  | b35d9a68-29f4-49ab-b83e-b5151679e3af | 11 | 77868429  | 77875064  | 28 | 6635  | NA | NA | 28 | NA | NA | NA |
| Skin-Melanoma  | b35d9a68-29f4-49ab-b83e-b5151679e3af | 11 | 93510076  | 93510641  | 9  | 565   | NA | 5  | 3  | NA | NA | 1  |
| Skin-Melanoma  | b35d9a68-29f4-49ab-b83e-b5151679e3af | 11 | 96171320  | 96172582  | 10 | 1262  | NA | 2  | 8  | NA | NA | NA |
| Skin-Melanoma  | b35d9a68-29f4-49ab-b83e-b5151679e3af | 11 | 106005098 | 106006192 | 9  | 1094  | 2  | 2  | 5  | NA | NA | NA |
| Skin-Melanoma  | b35d9a68-29f4-49ab-b83e-b5151679e3af | 18 | 14749799  | 14752302  | 6  | 2503  | 1  | 5  | NA | NA | NA | NA |
| Skin-Melanoma  | b35d9a68-29f4-49ab-b83e-b5151679e3af | 21 | 23764026  | 23767991  | 8  | 3965  | 1  | 3  | 3  | 1  | NA | NA |
| Skin-Melanoma  | b35d9a68-29f4-49ab-b83e-b5151679e3af | 22 | 17488105  | 17494096  | 8  | 5991  | 2  | 2  | 4  | NA | NA | NA |
| Skin-Melanoma  | b35d9a68-29f4-49ab-b83e-b5151679e3af | 22 | 31555447  | 31559035  | 7  | 3588  | NA | 2  | 5  | NA | NA | NA |
| Uterus-AdenoCA | b38d0777-4901-48b8-9cdc-33b7f13a424f | 16 | 77470503  | 77470864  | 10 | 361   | 1  | 4  | 5  | NA | NA | NA |
| Skin-Melanoma  | b3befa40-8f44-4eb6-ada0-ec395f460656 | 1  | 1472966   | 1473876   | 6  | 910   | 1  | NA | 3  | 1  | NA | 1  |
| Skin-Melanoma  | b3befa40-8f44-4eb6-ada0-ec395f460656 | 6  | 66480957  | 66488827  | 25 | 7870  | 5  | 7  | 13 | NA | NA | NA |
| Skin-Melanoma  | b3befa40-8f44-4eb6-ada0-ec395f460656 | 9  | 22550279  | 22556052  | 17 | 5773  | NA | 3  | 13 | NA | NA | 1  |
| Skin-Melanoma  | b3befa40-8f44-4eb6-ada0-ec395f460656 | 12 | 34479696  | 34484098  | 16 | 4402  | 2  | 5  | 9  | NA | NA | NA |
| Skin-Melanoma  | b3befa40-8f44-4eb6-ada0-ec395f460656 | 16 | 89699483  | 89703867  | 8  | 4384  | NA | NA | 8  | NA | NA | NA |
| Skin-Melanoma  | b3befa40-8f44-4eb6-ada0-ec395f460656 | 17 | 32172270  | 32174017  | 9  | 1747  | 1  | 2  | 6  | NA | NA | NA |

|                 |                                      |    |           |           |    |       |    |    |    |    |    |    |
|-----------------|--------------------------------------|----|-----------|-----------|----|-------|----|----|----|----|----|----|
| Skin-Melanoma   | b3bfa40-8f44-4eb6-ada0-ec395f460656  | 17 | 49036388  | 49042618  | 10 | 6230  | NA | NA | NA | 5  | 2  | 3  |
| Prost-AdenoCA   | b41c63e8-bb85-4f83-9bc6-e611fd9ef075 | 11 | 13756565  | 13759454  | 20 | 2889  | 1  | 13 | 5  | 1  | NA | NA |
| Panc-AdenoCA    | b47aa163-ec9-4225-940b-4373e78152e2  | 18 | 22734765  | 22736107  | 7  | 1342  | 1  | 2  | 4  | NA | NA | NA |
| Stomach-AdenoCA | b49d5310-3cc5-4386-9444-cf0d61b52376 | 4  | 154986626 | 154988852 | 6  | 2226  | 1  | NA | 4  | NA | 1  | NA |
| Panc-AdenoCA    | b54b9433-ec10-4cb5-a860-4555da64917b | 1  | 149284779 | 149286418 | 9  | 1639  | NA | NA | 9  | NA | NA | NA |
| Panc-AdenoCA    | b54b9433-ec10-4cb5-a860-4555da64917b | 1  | 230623757 | 230626584 | 7  | 2827  | 1  | NA | 6  | NA | NA | NA |
| Panc-AdenoCA    | b54b9433-ec10-4cb5-a860-4555da64917b | 4  | 180755747 | 180758023 | 6  | 2276  | 1  | 3  | 2  | NA | NA | NA |
| Panc-AdenoCA    | b54b9433-ec10-4cb5-a860-4555da64917b | 5  | 158298043 | 158301193 | 7  | 3150  | NA | 1  | 6  | NA | NA | NA |
| Panc-AdenoCA    | b54b9433-ec10-4cb5-a860-4555da64917b | 7  | 20820315  | 20821401  | 6  | 1086  | 2  | 3  | 1  | NA | NA | NA |
| Panc-AdenoCA    | b54b9433-ec10-4cb5-a860-4555da64917b | 7  | 114869052 | 114875250 | 8  | 6198  | 5  | 1  | 2  | NA | NA | NA |
| Panc-AdenoCA    | b54b9433-ec10-4cb5-a860-4555da64917b | 10 | 36429955  | 36432440  | 11 | 2485  | 1  | 5  | 5  | NA | NA | NA |
| Panc-AdenoCA    | b54b9433-ec10-4cb5-a860-4555da64917b | 10 | 93786359  | 93787608  | 10 | 1249  | 2  | 4  | 4  | NA | NA | NA |
| Panc-AdenoCA    | b54b9433-ec10-4cb5-a860-4555da64917b | 12 | 80601171  | 80603316  | 12 | 2145  | NA | 2  | 10 | NA | NA | NA |
| Panc-AdenoCA    | b54b9433-ec10-4cb5-a860-4555da64917b | 13 | 108094773 | 108101562 | 27 | 6789  | NA | 9  | 15 | NA | 1  | 2  |
| Panc-AdenoCA    | b54b9433-ec10-4cb5-a860-4555da64917b | 14 | 50019301  | 50019453  | 6  | 152   | NA | 3  | 3  | NA | NA | NA |
| Panc-AdenoCA    | b54b9433-ec10-4cb5-a860-4555da64917b | 16 | 60656254  | 60660448  | 6  | 4194  | 1  | 3  | 2  | NA | NA | NA |
| Panc-AdenoCA    | b54b9433-ec10-4cb5-a860-4555da64917b | 17 | 19869009  | 19870896  | 17 | 1887  | 2  | 3  | 12 | NA | NA | NA |
| Panc-AdenoCA    | b54b9433-ec10-4cb5-a860-4555da64917b | 18 | 39105381  | 39106296  | 13 | 915   | 1  | 2  | 10 | NA | NA | NA |
| Panc-AdenoCA    | b54b9433-ec10-4cb5-a860-4555da64917b | 19 | 46859671  | 46861101  | 6  | 1430  | 1  | 2  | 3  | NA | NA | NA |
| Panc-AdenoCA    | b54b9433-ec10-4cb5-a860-4555da64917b | X  | 93525408  | 93526179  | 7  | 771   | 1  | 4  | 2  | NA | NA | NA |
| Panc-AdenoCA    | b54b9433-ec10-4cb5-a860-4555da64917b | X  | 117165731 | 117166180 | 9  | 449   | 3  | 1  | 5  | NA | NA | NA |
| Liver-HCC       | b55751c4-c622-11e3-bf01-24c6515278c0 | 11 | 97933319  | 97933770  | 14 | 451   | 1  | 7  | 4  | NA | NA | 2  |
| Panc-AdenoCA    | b5cabb2a-30a4-458e-897c-00ec3fefa6d2 | 18 | 25726769  | 25728739  | 6  | 1970  | 1  | 4  | 1  | NA | NA | NA |
| Liver-HCC       | b67208c4-c622-11e3-bf01-24c6515278c0 | 4  | 58778438  | 58784653  | 11 | 6215  | NA | 6  | 5  | NA | NA | NA |
| Liver-HCC       | b67208c4-c622-11e3-bf01-24c6515278c0 | 10 | 87381627  | 87389039  | 12 | 7412  | 1  | 2  | 9  | NA | NA | NA |
| Panc-AdenoCA    | b7008a98-5aa0-4cc9-9bee-af2a422266db | 6  | 79096030  | 79096412  | 7  | 382   | 1  | 3  | 3  | NA | NA | NA |
| Panc-AdenoCA    | b7008a98-5aa0-4cc9-9bee-af2a422266db | 7  | 86097935  | 86098199  | 8  | 264   | 3  | 3  | 1  | NA | NA | 1  |
| Panc-AdenoCA    | b7008a98-5aa0-4cc9-9bee-af2a422266db | 12 | 24323382  | 24325513  | 8  | 2131  | NA | 1  | 7  | NA | NA | NA |
| Panc-AdenoCA    | b7008a98-5aa0-4cc9-9bee-af2a422266db | 17 | 11419030  | 11429138  | 54 | 10108 | NA | 2  | 52 | NA | NA | NA |
| Panc-AdenoCA    | b7008a98-5aa0-4cc9-9bee-af2a422266db | 18 | 28837319  | 28839065  | 7  | 1746  | 1  | 2  | 4  | NA | NA | NA |
| Breast-AdenoCa  | b752b444-f033-4be4-9d24-e5e80b4181af | 18 | 19309751  | 19314747  | 8  | 4996  | 4  | 1  | 3  | NA | NA | NA |
| Breast-AdenoCa  | b752b444-f033-4be4-9d24-e5e80b4181af | 20 | 23032937  | 23034704  | 14 | 1767  | 3  | 5  | 6  | NA | NA | NA |
| Ovary-AdenoCA   | b75b2663-dcc6-411c-bfcc-574aa33cf388 | 16 | 48168914  | 48171307  | 6  | 2393  | NA | 4  | 2  | NA | NA | NA |
| Uterus-AdenoCA  | b77084ab-8148-49e0-b3f9-90f7d9ea1862 | 11 | 57654886  | 57658112  | 6  | 3226  | NA | 2  | 4  | NA | NA | NA |
| Uterus-AdenoCA  | b77084ab-8148-49e0-b3f9-90f7d9ea1862 | 11 | 58285738  | 58290800  | 26 | 5062  | 1  | 9  | 14 | NA | NA | 2  |
| Uterus-AdenoCA  | b77084ab-8148-49e0-b3f9-90f7d9ea1862 | 11 | 58352455  | 58375343  | 26 | 22888 | 5  | 8  | 13 | NA | NA | NA |
| Uterus-AdenoCA  | b77084ab-8148-49e0-b3f9-90f7d9ea1862 | 11 | 59756244  | 59759595  | 17 | 3351  | 2  | 3  | 11 | NA | NA | 1  |
| Uterus-AdenoCA  | b77084ab-8148-49e0-b3f9-90f7d9ea1862 | 17 | 37715599  | 37718602  | 18 | 3003  | 6  | 3  | 9  | NA | NA | NA |
| Uterus-AdenoCA  | b77084ab-8148-49e0-b3f9-90f7d9ea1862 | 17 | 80773032  | 80775263  | 18 | 2231  | 3  | 6  | 9  | NA | NA | NA |
| Lung-SCC        | b7a7d93b-38a7-4fc3-a433-3bb0a8cb7c42 | 1  | 114648076 | 114649842 | 11 | 1766  | 1  | 2  | 8  | NA | NA | NA |
| Lung-SCC        | b7a7d93b-38a7-4fc3-a433-3bb0a8cb7c42 | 1  | 246156435 | 246161847 | 21 | 5412  | 2  | 8  | 11 | NA | NA | NA |
| Lung-SCC        | b7a7d93b-38a7-4fc3-a433-3bb0a8cb7c42 | 2  | 72959781  | 72960718  | 16 | 937   | NA | NA | 16 | NA | NA | NA |
| Head-SCC        | b86e88e7-0d5f-4b32-a35f-dc97251ab990 | 2  | 106108517 | 106115117 | 13 | 6600  | 1  | 6  | 5  | NA | 1  | NA |
| Head-SCC        | b86e88e7-0d5f-4b32-a35f-dc97251ab990 | 2  | 154606925 | 154610965 | 8  | 4040  | NA | 2  | 6  | NA | NA | NA |
| Head-SCC        | b86e88e7-0d5f-4b32-a35f-dc97251ab990 | 3  | 50047028  | 50050292  | 6  | 3264  | NA | 3  | 3  | NA | NA | NA |
| Head-SCC        | b86e88e7-0d5f-4b32-a35f-dc97251ab990 | 6  | 37716298  | 37723906  | 13 | 7608  | 2  | 4  | 7  | NA | NA | NA |
| Head-SCC        | b86e88e7-0d5f-4b32-a35f-dc97251ab990 | 8  | 25229120  | 25232544  | 7  | 3424  | 2  | 3  | 2  | NA | NA | NA |
| Head-SCC        | b86e88e7-0d5f-4b32-a35f-dc97251ab990 | 10 | 109353297 | 109359066 | 8  | 5769  | NA | 3  | 5  | NA | NA | NA |
| Head-SCC        | b86e88e7-0d5f-4b32-a35f-dc97251ab990 | 12 | 124082940 | 124085180 | 6  | 2240  | 2  | 3  | 1  | NA | NA | NA |
| Eso-AdenoCa     | b8f3137e-5e92-4a56-90d4-884a4ed2ef9c | 3  | 136406695 | 136410757 | 7  | 4062  | 1  | 3  | 3  | NA | NA | NA |
| Eso-AdenoCa     | b8f3137e-5e92-4a56-90d4-884a4ed2ef9c | 5  | 73055270  | 73058820  | 6  | 3550  | NA | 4  | 1  | 1  | NA | NA |
| Eso-AdenoCa     | b8f3137e-5e92-4a56-90d4-884a4ed2ef9c | 7  | 50194250  | 50194770  | 12 | 520   | NA | NA | NA | 12 | NA | NA |
| Eso-AdenoCa     | b8f3137e-5e92-4a56-90d4-884a4ed2ef9c | 13 | 45284020  | 45285720  | 9  | 1700  | NA | NA | NA | 9  | NA | NA |
| Eso-AdenoCa     | b8f3137e-5e92-4a56-90d4-884a4ed2ef9c | 19 | 46660314  | 46660973  | 6  | 659   | NA | 5  | 1  | NA | NA | NA |
| Eso-AdenoCa     | b8f3137e-5e92-4a56-90d4-884a4ed2ef9c | X  | 99930125  | 99931358  | 6  | 1233  | 1  | 4  | 1  | NA | NA | NA |
| Liver-HCC       | b994762c-c622-11e3-bf01-24c6515278c0 | 6  | 7048752   | 7051424   | 15 | 2672  | 5  | 6  | 4  | NA | NA | NA |
| Eso-AdenoCa     | b9bcba3a-c9be-4305-b5f4-c861282921e0 | 1  | 83003403  | 83004764  | 11 | 1361  | NA | NA | NA | 5  | 4  | 2  |
| Eso-AdenoCa     | b9bcba3a-c9be-4305-b5f4-c861282921e0 | 2  | 81659686  | 81663739  | 6  | 4053  | NA | 1  | 1  | 1  | 2  | 1  |
| Eso-AdenoCa     | b9bcba3a-c9be-4305-b5f4-c861282921e0 | 2  | 215482904 | 215489960 | 9  | 7056  | NA | NA | 2  | 3  | 2  | 2  |
| Eso-AdenoCa     | b9bcba3a-c9be-4305-b5f4-c861282921e0 | 3  | 163720257 | 163722838 | 6  | 2581  | 1  | NA | 1  | 1  | NA | 3  |

|                |                                      |    |           |           |    |       |    |    |    |    |    |    |
|----------------|--------------------------------------|----|-----------|-----------|----|-------|----|----|----|----|----|----|
| Eso-AdenoCa    | b9bcba3a-c9be-4305-b5f4-c861282921e0 | 4  | 158009929 | 158012047 | 6  | 2118  | 1  | NA | NA | 1  | 3  | 1  |
| Eso-AdenoCa    | b9bcba3a-c9be-4305-b5f4-c861282921e0 | 5  | 163873748 | 163877165 | 10 | 3417  | NA | NA | 1  | 3  | 4  | 2  |
| Eso-AdenoCa    | b9bcba3a-c9be-4305-b5f4-c861282921e0 | 9  | 28206043  | 28207651  | 6  | 1608  | NA | NA | NA | NA | 5  | 1  |
| Eso-AdenoCa    | b9bcba3a-c9be-4305-b5f4-c861282921e0 | 12 | 84641835  | 84644391  | 6  | 2556  | NA | NA | NA | 3  | NA | 3  |
| Eso-AdenoCa    | b9bcba3a-c9be-4305-b5f4-c861282921e0 | 13 | 56213358  | 56217681  | 6  | 4323  | NA | NA | NA | 1  | 1  | 4  |
| Eso-AdenoCa    | b9bcba3a-c9be-4305-b5f4-c861282921e0 | 13 | 65433242  | 65438826  | 7  | 5584  | NA | NA | NA | 3  | 2  | 2  |
| Eso-AdenoCa    | b9bcba3a-c9be-4305-b5f4-c861282921e0 | 13 | 67829724  | 67835559  | 8  | 5835  | NA | NA | NA | 3  | 2  | 3  |
| Eso-AdenoCa    | b9bcba3a-c9be-4305-b5f4-c861282921e0 | 13 | 90676813  | 90683652  | 9  | 6839  | NA | NA | NA | 4  | 3  | 2  |
| Eso-AdenoCa    | b9bcba3a-c9be-4305-b5f4-c861282921e0 | 13 | 92619691  | 92620443  | 7  | 752   | NA | NA | NA | 5  | 1  | 1  |
| Eso-AdenoCa    | b9bcba3a-c9be-4305-b5f4-c861282921e0 | 18 | 40272205  | 40276347  | 6  | 4142  | 2  | NA | 1  | 1  | 2  | NA |
| Eso-AdenoCa    | b9bcba3a-c9be-4305-b5f4-c861282921e0 | X  | 140943625 | 140946713 | 8  | 3088  | 2  | NA | NA | 4  | 1  | 1  |
| Cervix-AdenoCA | b9d1a64e-d445-4174-a5b4-76dd6ea69419 | 10 | 134189077 | 134192981 | 9  | 3904  | NA | 2  | 7  | NA | NA | NA |
| Lymph-BNHL     | b9dbc78e-44ce-427c-bbeb-de8d097bde2c | 2  | 136873464 | 136875888 | 15 | 2424  | NA | 5  | 5  | 4  | NA | 1  |
| Lymph-BNHL     | b9dbc78e-44ce-427c-bbeb-de8d097bde2c | 3  | 32021891  | 32024016  | 20 | 2125  | 2  | 6  | 9  | 1  | 1  | 1  |
| Lymph-BNHL     | b9dbc78e-44ce-427c-bbeb-de8d097bde2c | 4  | 49620     | 51904     | 7  | 2284  | 1  | 2  | NA | 2  | NA | 2  |
| Lymph-BNHL     | b9dbc78e-44ce-427c-bbeb-de8d097bde2c | 4  | 40199023  | 40201830  | 9  | 2807  | 1  | NA | 4  | 2  | 2  | NA |
| Lymph-BNHL     | b9dbc78e-44ce-427c-bbeb-de8d097bde2c | 9  | 37025361  | 37026776  | 7  | 1415  | NA | 2  | 4  | NA | 1  | NA |
| Lymph-BNHL     | b9dbc78e-44ce-427c-bbeb-de8d097bde2c | 11 | 65266612  | 65267472  | 6  | 860   | NA | NA | 1  | 2  | 2  | 1  |
| Lymph-BNHL     | b9dbc78e-44ce-427c-bbeb-de8d097bde2c | 12 | 25206818  | 25213059  | 13 | 6241  | 1  | 5  | 2  | 1  | 2  | 2  |
| Lymph-BNHL     | b9dbc78e-44ce-427c-bbeb-de8d097bde2c | 12 | 92538069  | 92539302  | 15 | 1233  | 3  | 3  | 4  | 2  | 2  | 1  |
| Lymph-BNHL     | b9dbc78e-44ce-427c-bbeb-de8d097bde2c | 12 | 113494725 | 113496475 | 10 | 1750  | 2  | 1  | 5  | NA | 2  | NA |
| Lymph-BNHL     | b9dbc78e-44ce-427c-bbeb-de8d097bde2c | 13 | 46946467  | 46948706  | 10 | 2239  | NA | 1  | 8  | 1  | NA | NA |
| Lymph-BNHL     | b9dbc78e-44ce-427c-bbeb-de8d097bde2c | 13 | 46959249  | 46961141  | 11 | 1892  | 3  | 1  | 6  | NA | 1  | NA |
| Lymph-BNHL     | b9dbc78e-44ce-427c-bbeb-de8d097bde2c | 14 | 69257956  | 69259538  | 8  | 1582  | 1  | 3  | 1  | NA | 1  | 2  |
| Lymph-BNHL     | b9dbc78e-44ce-427c-bbeb-de8d097bde2c | 14 | 96178902  | 96180184  | 10 | 1282  | 2  | 4  | 1  | 1  | 1  | 1  |
| Lymph-BNHL     | b9dbc78e-44ce-427c-bbeb-de8d097bde2c | 14 | 106209410 | 106213368 | 12 | 3958  | 1  | 2  | 9  | NA | NA | NA |
| Lymph-BNHL     | b9dbc78e-44ce-427c-bbeb-de8d097bde2c | 14 | 106320319 | 106329069 | 42 | 8750  | 6  | 8  | 20 | 2  | 3  | 3  |
| Lymph-BNHL     | b9dbc78e-44ce-427c-bbeb-de8d097bde2c | 14 | 106387128 | 106391285 | 10 | 4157  | NA | 1  | 9  | NA | NA | NA |
| Lymph-BNHL     | b9dbc78e-44ce-427c-bbeb-de8d097bde2c | 17 | 75446089  | 75450404  | 9  | 4315  | 1  | 3  | 5  | NA | NA | NA |
| Lymph-BNHL     | b9dbc78e-44ce-427c-bbeb-de8d097bde2c | 22 | 22712125  | 22712521  | 9  | 396   | NA | 2  | 3  | NA | 1  | 3  |
| Lymph-BNHL     | b9dbc78e-44ce-427c-bbeb-de8d097bde2c | 22 | 23230078  | 23249096  | 65 | 19018 | 4  | 14 | 30 | 8  | 4  | 5  |
| Eso-AdenoCa    | ba096d4f-5a6c-4c31-ae03-e7483cf58c38 | 11 | 100039832 | 100043233 | 6  | 3401  | 2  | 1  | 2  | 1  | NA | NA |
| Eso-AdenoCa    | ba096d4f-5a6c-4c31-ae03-e7483cf58c38 | 12 | 50206533  | 50207595  | 11 | 1062  | 1  | 7  | 3  | NA | NA | NA |
| Lymph-BNHL     | baa02e74-9cae-4996-858e-17d9f52d924b | 1  | 222857128 | 222857366 | 6  | 238   | NA | NA | NA | 2  | 1  | 3  |
| Lymph-BNHL     | baa02e74-9cae-4996-858e-17d9f52d924b | 2  | 65590827  | 65593668  | 6  | 2841  | 2  | 1  | NA | 2  | 1  | NA |
| Lymph-BNHL     | baa02e74-9cae-4996-858e-17d9f52d924b | 2  | 89140636  | 89145911  | 7  | 5275  | NA | NA | NA | NA | 5  | 2  |
| Lymph-BNHL     | baa02e74-9cae-4996-858e-17d9f52d924b | 2  | 89154304  | 89160450  | 65 | 6146  | 2  | 7  | 9  | 27 | 4  | 16 |
| Lymph-BNHL     | baa02e74-9cae-4996-858e-17d9f52d924b | 3  | 187460824 | 187463283 | 26 | 2459  | NA | 6  | 6  | 4  | 3  | 7  |
| Lymph-BNHL     | baa02e74-9cae-4996-858e-17d9f52d924b | 3  | 187658409 | 187661267 | 10 | 2858  | 1  | 4  | 2  | 1  | 2  | NA |
| Lymph-BNHL     | baa02e74-9cae-4996-858e-17d9f52d924b | 3  | 187957504 | 187962068 | 10 | 4564  | NA | 2  | NA | 3  | 1  | 4  |
| Lymph-BNHL     | baa02e74-9cae-4996-858e-17d9f52d924b | 3  | 188471627 | 188472033 | 7  | 406   | NA | 1  | NA | 4  | 1  | 1  |
| Lymph-BNHL     | baa02e74-9cae-4996-858e-17d9f52d924b | 4  | 25863537  | 25865750  | 7  | 2213  | NA | 1  | 2  | 4  | NA | NA |
| Lymph-BNHL     | baa02e74-9cae-4996-858e-17d9f52d924b | 4  | 40195502  | 40200350  | 11 | 4848  | NA | NA | 3  | 6  | 1  | 1  |
| Lymph-BNHL     | baa02e74-9cae-4996-858e-17d9f52d924b | 5  | 15551119  | 15555096  | 6  | 3977  | NA | NA | NA | 4  | 2  | NA |
| Lymph-BNHL     | baa02e74-9cae-4996-858e-17d9f52d924b | 6  | 91000864  | 91006663  | 16 | 5799  | 1  | 2  | 1  | 5  | 5  | 2  |
| Lymph-BNHL     | baa02e74-9cae-4996-858e-17d9f52d924b | 7  | 105730255 | 105730387 | 7  | 132   | NA | NA | NA | 5  | 2  | NA |
| Lymph-BNHL     | baa02e74-9cae-4996-858e-17d9f52d924b | 7  | 110663313 | 110667705 | 7  | 4392  | NA | NA | 1  | 1  | 1  | 4  |
| Lymph-BNHL     | baa02e74-9cae-4996-858e-17d9f52d924b | 7  | 110719406 | 110724916 | 7  | 5510  | 1  | NA | 1  | 1  | 2  | 2  |
| Lymph-BNHL     | baa02e74-9cae-4996-858e-17d9f52d924b | 7  | 110736169 | 110742749 | 8  | 6580  | NA | NA | 1  | 2  | 2  | 3  |
| Lymph-BNHL     | baa02e74-9cae-4996-858e-17d9f52d924b | 7  | 110765186 | 110774548 | 13 | 9362  | NA | NA | NA | 6  | 2  | 5  |
| Lymph-BNHL     | baa02e74-9cae-4996-858e-17d9f52d924b | 12 | 113495518 | 113496639 | 6  | 1121  | 2  | NA | 1  | 2  | 1  | NA |
| Lymph-BNHL     | baa02e74-9cae-4996-858e-17d9f52d924b | 12 | 122458040 | 122463800 | 26 | 5760  | 2  | 2  | 6  | 8  | 4  | 4  |
| Lymph-BNHL     | baa02e74-9cae-4996-858e-17d9f52d924b | 14 | 106067590 | 106072065 | 13 | 4475  | 2  | 5  | 4  | 2  | NA | NA |
| Lymph-BNHL     | baa02e74-9cae-4996-858e-17d9f52d924b | 14 | 106240367 | 106241976 | 8  | 1609  | 1  | NA | 7  | NA | NA | NA |
| Lymph-BNHL     | baa02e74-9cae-4996-858e-17d9f52d924b | 14 | 106323083 | 106328864 | 85 | 5781  | 5  | 16 | 33 | 14 | 8  | 9  |
| Lymph-BNHL     | baa02e74-9cae-4996-858e-17d9f52d924b | 14 | 106493788 | 106494363 | 14 | 575   | 1  | 1  | 3  | 5  | 2  | 2  |
| Lymph-BNHL     | baa02e74-9cae-4996-858e-17d9f52d924b | 16 | 10972330  | 10973520  | 7  | 1190  | NA | 2  | 5  | NA | NA | NA |
| Lymph-BNHL     | baa02e74-9cae-4996-858e-17d9f52d924b | 16 | 62013900  | 62016875  | 7  | 2975  | NA | 1  | NA | 2  | 2  | 2  |
| Lymph-BNHL     | baa02e74-9cae-4996-858e-17d9f52d924b | 16 | 85933048  | 85934446  | 17 | 1398  | 1  | 2  | 3  | 2  | 7  | 2  |
| Lymph-BNHL     | baa02e74-9cae-4996-858e-17d9f52d924b | 18 | 60805688  | 60809499  | 8  | 3811  | NA | 2  | 1  | 2  | 1  | 2  |



|                  |                                      |    |           |           |    |       |    |    |    |    |    |    |
|------------------|--------------------------------------|----|-----------|-----------|----|-------|----|----|----|----|----|----|
| Lymph-BNHL       | baa02e74-9cae-4996-858e-17d9f52d924b | 18 | 60873246  | 60876259  | 7  | 3013  | NA | 1  | 1  | 1  | 3  | 1  |
| Lymph-BNHL       | baa02e74-9cae-4996-858e-17d9f52d924b | 18 | 60984826  | 60988444  | 33 | 3618  | NA | 7  | 9  | 9  | 4  | 4  |
| Lymph-BNHL       | baa02e74-9cae-4996-858e-17d9f52d924b | 19 | 10340147  | 10341506  | 11 | 1359  | 3  | 6  | NA | 2  | NA | NA |
| Lymph-BNHL       | baa02e74-9cae-4996-858e-17d9f52d924b | 22 | 23198470  | 23199408  | 14 | 938   | NA | 2  | 2  | 5  | 2  | 3  |
| Lymph-BNHL       | baa02e74-9cae-4996-858e-17d9f52d924b | 22 | 23223024  | 23288986  | 91 | 65962 | 4  | 14 | 23 | 26 | 11 | 13 |
| Lymph-BNHL       | baa02e74-9cae-4996-858e-17d9f52d924b | 22 | 29195775  | 29196242  | 7  | 467   | NA | 2  | 2  | 2  | 1  | NA |
| Lymph-BNHL       | baa02e74-9cae-4996-858e-17d9f52d924b | X  | 33144963  | 33146418  | 8  | 1455  | NA | NA | 1  | 2  | NA | 5  |
| Eso-AdenoCa      | bb5bedd3-d8fc-4739-8e6b-9e37223f8be2 | 5  | 25253317  | 25257350  | 6  | 4033  | NA | NA | NA | 2  | 3  | 1  |
| Eso-AdenoCa      | bb5bedd3-d8fc-4739-8e6b-9e37223f8be2 | 6  | 154761490 | 154761946 | 9  | 456   | 2  | 2  | 5  | NA | NA | NA |
| ColoRect-AdenoCA | bb6150f7-23e4-40f2-b466-6b6edd19c502 | 2  | 45071056  | 45071951  | 11 | 895   | 2  | 2  | 7  | NA | NA | NA |
| Biliary-AdenoCA  | bb65d670-0411-4fc5-a6cb-019caec1ab36 | 1  | 62039296  | 62041385  | 8  | 2089  | NA | NA | 6  | 2  | NA | NA |
| Biliary-AdenoCA  | bb65d670-0411-4fc5-a6cb-019caec1ab36 | 2  | 62503099  | 62503952  | 9  | 853   | 1  | 3  | 5  | NA | NA | NA |
| Biliary-AdenoCA  | bb65d670-0411-4fc5-a6cb-019caec1ab36 | 2  | 164158117 | 164158486 | 9  | 369   | NA | 1  | 8  | NA | NA | NA |
| Biliary-AdenoCA  | bb65d670-0411-4fc5-a6cb-019caec1ab36 | 2  | 240523919 | 240529419 | 7  | 5500  | NA | NA | 7  | NA | NA | NA |
| Biliary-AdenoCA  | bb65d670-0411-4fc5-a6cb-019caec1ab36 | 3  | 135923867 | 135924905 | 7  | 1038  | 1  | NA | 6  | NA | NA | NA |
| Biliary-AdenoCA  | bb65d670-0411-4fc5-a6cb-019caec1ab36 | 5  | 1739796   | 1741338   | 12 | 1542  | 1  | 2  | 7  | NA | 1  | 1  |
| Biliary-AdenoCA  | bb65d670-0411-4fc5-a6cb-019caec1ab36 | 5  | 2416797   | 2417998   | 11 | 1201  | 1  | 3  | 7  | NA | NA | NA |
| Biliary-AdenoCA  | bb65d670-0411-4fc5-a6cb-019caec1ab36 | 5  | 84304368  | 84320993  | 43 | 16625 | 5  | 12 | 25 | 1  | NA | NA |
| Biliary-AdenoCA  | bb65d670-0411-4fc5-a6cb-019caec1ab36 | 5  | 85181445  | 85182439  | 7  | 994   | 1  | 2  | 4  | NA | NA | NA |
| Biliary-AdenoCA  | bb65d670-0411-4fc5-a6cb-019caec1ab36 | 5  | 86811498  | 86812491  | 12 | 993   | 2  | 1  | 9  | NA | NA | NA |
| Biliary-AdenoCA  | bb65d670-0411-4fc5-a6cb-019caec1ab36 | 6  | 57287951  | 57293276  | 20 | 5325  | 5  | 8  | 7  | NA | NA | NA |
| Biliary-AdenoCA  | bb65d670-0411-4fc5-a6cb-019caec1ab36 | 6  | 69516031  | 69516494  | 7  | 463   | 1  | 2  | 4  | NA | NA | NA |
| Biliary-AdenoCA  | bb65d670-0411-4fc5-a6cb-019caec1ab36 | 6  | 91062487  | 91063395  | 8  | 908   | 1  | 3  | 4  | NA | NA | NA |
| Biliary-AdenoCA  | bb65d670-0411-4fc5-a6cb-019caec1ab36 | 6  | 101243413 | 101243757 | 8  | 344   | 1  | 1  | 5  | NA | NA | 1  |
| Biliary-AdenoCA  | bb65d670-0411-4fc5-a6cb-019caec1ab36 | 6  | 119130604 | 119133020 | 13 | 2416  | 1  | 3  | 9  | NA | NA | NA |
| Biliary-AdenoCA  | bb65d670-0411-4fc5-a6cb-019caec1ab36 | 9  | 578848    | 580587    | 8  | 1739  | NA | NA | 8  | NA | NA | NA |
| Biliary-AdenoCA  | bb65d670-0411-4fc5-a6cb-019caec1ab36 | 12 | 29979652  | 29985439  | 25 | 5787  | 4  | 8  | 12 | NA | NA | 1  |
| Biliary-AdenoCA  | bb65d670-0411-4fc5-a6cb-019caec1ab36 | 14 | 26485931  | 26488781  | 14 | 2850  | NA | NA | 14 | NA | NA | NA |
| Biliary-AdenoCA  | bb65d670-0411-4fc5-a6cb-019caec1ab36 | 14 | 34344113  | 34344309  | 11 | 196   | 2  | 1  | 8  | NA | NA | NA |
| Biliary-AdenoCA  | bb65d670-0411-4fc5-a6cb-019caec1ab36 | 20 | 44515003  | 44517309  | 10 | 2306  | NA | 2  | 7  | 1  | NA | NA |
| Biliary-AdenoCA  | bb65d670-0411-4fc5-a6cb-019caec1ab36 | 20 | 45274358  | 45278806  | 8  | 4448  | NA | 5  | 3  | NA | NA | NA |
| Biliary-AdenoCA  | bb65d670-0411-4fc5-a6cb-019caec1ab36 | X  | 68798924  | 68813113  | 24 | 14189 | 3  | 12 | 9  | NA | NA | NA |
| Panc-AdenoCA     | bb8176a7-ea7c-42d7-a85a-cec1ca386f2e | 17 | 31111881  | 31118882  | 16 | 7001  | 1  | 6  | 9  | NA | NA | NA |
| Liver-HCC        | bba106ce-c622-11e3-bf01-24c6515278c0 | 18 | 1962174   | 1966025   | 13 | 3851  | 1  | 7  | 5  | NA | NA | NA |
| Liver-HCC        | bba106ce-c622-11e3-bf01-24c6515278c0 | 19 | 15451315  | 15454182  | 21 | 2867  | NA | 8  | 13 | NA | NA | NA |
| Ovary-AdenoCA    | bbb2cf2f-8f32-43d4-846c-d1020e6329ec | 12 | 19761930  | 19764568  | 6  | 2638  | 1  | 2  | 2  | 1  | NA | NA |
| Ovary-AdenoCA    | bbb2cf2f-8f32-43d4-846c-d1020e6329ec | 12 | 21803858  | 21808619  | 7  | 4761  | 2  | NA | 5  | NA | NA | NA |
| Panc-AdenoCA     | bbdd7393-024b-4073-b5bc-ef7a68c15b8a | X  | 139185890 | 139185900 | 9  | 10    | 1  | NA | 2  | 4  | NA | 2  |
| Panc-AdenoCA     | bbff7954-95ec-455c-b0bc-92f67a09ee77 | 1  | 158808887 | 158809464 | 6  | 577   | 1  | NA | 5  | NA | NA | NA |
| Panc-AdenoCA     | bbff7954-95ec-455c-b0bc-92f67a09ee77 | 15 | 61460779  | 61462309  | 6  | 1530  | NA | 3  | 3  | NA | NA | NA |
| Panc-AdenoCA     | bbff7954-95ec-455c-b0bc-92f67a09ee77 | 15 | 66835290  | 66836926  | 7  | 1636  | NA | 2  | 5  | NA | NA | NA |
| Panc-AdenoCA     | bbff7954-95ec-455c-b0bc-92f67a09ee77 | 15 | 98464380  | 98464881  | 8  | 501   | 2  | 1  | 5  | NA | NA | NA |
| Panc-AdenoCA     | bbff7954-95ec-455c-b0bc-92f67a09ee77 | 15 | 102086175 | 102086915 | 7  | 740   | NA | 1  | 6  | NA | NA | NA |
| Panc-AdenoCA     | bbff7954-95ec-455c-b0bc-92f67a09ee77 | 15 | 102107425 | 102117495 | 18 | 10070 | 1  | 2  | 15 | NA | NA | NA |
| Panc-AdenoCA     | bbff7954-95ec-455c-b0bc-92f67a09ee77 | 18 | 25196705  | 25198831  | 6  | 2126  | 1  | 1  | 4  | NA | NA | NA |
| Panc-AdenoCA     | bbff7954-95ec-455c-b0bc-92f67a09ee77 | 20 | 4919069   | 4919892   | 9  | 823   | NA | 3  | 6  | NA | NA | NA |
| Panc-AdenoCA     | bbff7954-95ec-455c-b0bc-92f67a09ee77 | 20 | 6729174   | 6729489   | 7  | 315   | 2  | 3  | 2  | NA | NA | NA |
| Stomach-AdenoCA  | bc0dee07-de20-44d6-be65-05af7e63ac96 | 4  | 73042895  | 73043409  | 6  | 514   | 1  | NA | 4  | 1  | NA | NA |
| Stomach-AdenoCA  | bc0dee07-de20-44d6-be65-05af7e63ac96 | 22 | 43977562  | 43993502  | 22 | 15940 | 5  | 6  | 11 | NA | NA | NA |
| Stomach-AdenoCA  | bc0dee07-de20-44d6-be65-05af7e63ac96 | 22 | 44015722  | 44019690  | 8  | 3968  | 2  | NA | 6  | NA | NA | NA |
| Stomach-AdenoCA  | bc0dee07-de20-44d6-be65-05af7e63ac96 | X  | 85288607  | 85299720  | 17 | 11113 | 2  | 5  | 10 | NA | NA | NA |
| Lymph-BNHL       | bc1d5327-2e76-4e0e-b749-72a559469d0d | 8  | 88769256  | 88772566  | 6  | 3310  | 1  | NA | 1  | 4  | NA | NA |
| Lymph-BNHL       | bc1d5327-2e76-4e0e-b749-72a559469d0d | 8  | 88777000  | 88796913  | 26 | 19913 | 2  | 2  | 3  | 9  | 1  | 9  |
| Lymph-BNHL       | bc1d5327-2e76-4e0e-b749-72a559469d0d | 14 | 106210543 | 106213791 | 7  | 3248  | 1  | 2  | 4  | NA | NA | NA |
| Lymph-BNHL       | bc1d5327-2e76-4e0e-b749-72a559469d0d | 14 | 106326843 | 106351024 | 33 | 24181 | 5  | 9  | 11 | 6  | 1  | 1  |
| Panc-AdenoCA     | bcef0b6c-6584-4090-9d28-ef784a7e5fbb | 10 | 134436743 | 134449208 | 16 | 12465 | 5  | 6  | 5  | NA | NA | NA |
| Panc-AdenoCA     | bcef0b6c-6584-4090-9d28-ef784a7e5fbb | 16 | 30838738  | 30851260  | 24 | 12522 | NA | 6  | 17 | NA | NA | 1  |
| Skin-Melanoma    | bcf76f1a-7109-422d-94c9-5e8364895fa0 | 1  | 4519055   | 4523471   | 6  | 4416  | 2  | 3  | 1  | NA | NA | NA |
| Skin-Melanoma    | bcf76f1a-7109-422d-94c9-5e8364895fa0 | 2  | 84673377  | 84676992  | 10 | 3615  | NA | 5  | 5  | NA | NA | NA |
| Skin-Melanoma    | bcf76f1a-7109-422d-94c9-5e8364895fa0 | 2  | 184758037 | 184759608 | 7  | 1571  | 3  | 4  | NA | NA | NA | NA |

|                 |                                      |    |           |           |     |       |    |    |    |    |    |    |
|-----------------|--------------------------------------|----|-----------|-----------|-----|-------|----|----|----|----|----|----|
| Skin-Melanoma   | bcf76f1a-7109-422d-94c9-5e8364895fa0 | 2  | 188601839 | 188604099 | 13  | 2260  | 4  | 4  | 5  | NA | NA | NA |
| Skin-Melanoma   | bcf76f1a-7109-422d-94c9-5e8364895fa0 | 2  | 189946260 | 189949111 | 10  | 2851  | 2  | 2  | 6  | NA | NA | NA |
| Skin-Melanoma   | bcf76f1a-7109-422d-94c9-5e8364895fa0 | 2  | 191025410 | 191027673 | 8   | 2263  | 1  | 6  | 1  | NA | NA | NA |
| Skin-Melanoma   | bcf76f1a-7109-422d-94c9-5e8364895fa0 | 3  | 89597042  | 89599751  | 10  | 2709  | 2  | 5  | 3  | NA | NA | NA |
| Skin-Melanoma   | bcf76f1a-7109-422d-94c9-5e8364895fa0 | 4  | 176023227 | 176026270 | 11  | 3043  | 2  | 3  | 6  | NA | NA | NA |
| Skin-Melanoma   | bcf76f1a-7109-422d-94c9-5e8364895fa0 | 8  | 3789083   | 3789331   | 6   | 248   | NA | NA | 6  | NA | NA | NA |
| Skin-Melanoma   | bcf76f1a-7109-422d-94c9-5e8364895fa0 | 8  | 136974660 | 136980734 | 11  | 6074  | 2  | 2  | 7  | NA | NA | NA |
| Skin-Melanoma   | bcf76f1a-7109-422d-94c9-5e8364895fa0 | 11 | 17127551  | 17131089  | 6   | 3538  | NA | 2  | 4  | NA | NA | NA |
| Skin-Melanoma   | bcf76f1a-7109-422d-94c9-5e8364895fa0 | 17 | 9225405   | 9228584   | 8   | 3179  | 1  | 6  | NA | NA | NA | 1  |
| Skin-Melanoma   | bcf76f1a-7109-422d-94c9-5e8364895fa0 | X  | 5590798   | 5591669   | 9   | 871   | NA | 7  | 2  | NA | NA | NA |
| Skin-Melanoma   | bcf76f1a-7109-422d-94c9-5e8364895fa0 | X  | 137906058 | 137908684 | 9   | 2626  | 2  | 5  | 2  | NA | NA | NA |
| Skin-Melanoma   | bcf76f1a-7109-422d-94c9-5e8364895fa0 | Y  | 18926563  | 18940532  | 34  | 13969 | 3  | 13 | 17 | NA | NA | 1  |
| Stomach-AdenoCA | bd2f8133-3e71-4c5e-998f-0c1a9fdb75f  | 11 | 3715686   | 3717504   | 6   | 1818  | NA | 5  | 1  | NA | NA | NA |
| Lymph-BNHL      | bd403458-5154-488b-931a-a7e737a6bf8c | 1  | 203275229 | 203275856 | 7   | 627   | NA | 1  | 2  | 1  | 1  | 2  |
| Lymph-BNHL      | bd403458-5154-488b-931a-a7e737a6bf8c | 2  | 89127404  | 89128775  | 10  | 1371  | 1  | 2  | NA | 2  | 3  | 2  |
| Lymph-BNHL      | bd403458-5154-488b-931a-a7e737a6bf8c | 2  | 89137538  | 89142675  | 12  | 5137  | 1  | 1  | 1  | 5  | 3  | 1  |
| Lymph-BNHL      | bd403458-5154-488b-931a-a7e737a6bf8c | 2  | 89154806  | 89327165  | 202 | 2E+05 | 10 | 19 | 21 | 64 | 32 | 56 |
| Lymph-BNHL      | bd403458-5154-488b-931a-a7e737a6bf8c | 2  | 136874767 | 136875527 | 13  | 760   | 1  | 2  | 5  | 3  | NA | 2  |
| Lymph-BNHL      | bd403458-5154-488b-931a-a7e737a6bf8c | 2  | 204400600 | 204407893 | 14  | 7293  | 1  | NA | 3  | 5  | NA | 5  |
| Lymph-BNHL      | bd403458-5154-488b-931a-a7e737a6bf8c | 3  | 2133637   | 2138000   | 7   | 4363  | 1  | NA | NA | 3  | 1  | 2  |
| Lymph-BNHL      | bd403458-5154-488b-931a-a7e737a6bf8c | 3  | 187462250 | 187463783 | 18  | 1533  | 1  | 7  | 2  | 3  | 3  | 2  |
| Lymph-BNHL      | bd403458-5154-488b-931a-a7e737a6bf8c | 3  | 187957308 | 187959934 | 21  | 2626  | NA | 1  | 3  | 9  | 6  | 2  |
| Lymph-BNHL      | bd403458-5154-488b-931a-a7e737a6bf8c | 3  | 188471260 | 188473993 | 7   | 2733  | NA | 2  | 1  | 1  | 3  | NA |
| Lymph-BNHL      | bd403458-5154-488b-931a-a7e737a6bf8c | 4  | 40193834  | 40202724  | 18  | 8890  | NA | 1  | 6  | 2  | 4  | 5  |
| Lymph-BNHL      | bd403458-5154-488b-931a-a7e737a6bf8c | 5  | 90028105  | 90032972  | 12  | 4867  | 3  | 1  | NA | 5  | 1  | 2  |
| Lymph-BNHL      | bd403458-5154-488b-931a-a7e737a6bf8c | 6  | 31540653  | 31549999  | 26  | 9346  | 4  | 4  | 6  | 4  | 5  | 3  |
| Lymph-BNHL      | bd403458-5154-488b-931a-a7e737a6bf8c | 6  | 91005225  | 91007018  | 8   | 1793  | NA | 1  | 3  | 2  | 2  | NA |
| Lymph-BNHL      | bd403458-5154-488b-931a-a7e737a6bf8c | 6  | 134493478 | 134536616 | 73  | 43138 | 2  | 10 | 17 | 15 | 14 | 15 |
| Lymph-BNHL      | bd403458-5154-488b-931a-a7e737a6bf8c | 7  | 14333031  | 14338665  | 7   | 5634  | NA | NA | 2  | 1  | 1  | 3  |
| Lymph-BNHL      | bd403458-5154-488b-931a-a7e737a6bf8c | 7  | 14341994  | 14344576  | 7   | 2582  | NA | NA | NA | 2  | 1  | 4  |
| Lymph-BNHL      | bd403458-5154-488b-931a-a7e737a6bf8c | 11 | 102188510 | 102189479 | 7   | 969   | NA | 1  | 3  | 1  | NA | 2  |
| Lymph-BNHL      | bd403458-5154-488b-931a-a7e737a6bf8c | 12 | 122459042 | 122466517 | 16  | 7475  | 1  | 1  | 4  | 5  | 4  | 1  |
| Lymph-BNHL      | bd403458-5154-488b-931a-a7e737a6bf8c | 14 | 43108069  | 43109843  | 6   | 1774  | NA | NA | 1  | 2  | 2  | 1  |
| Lymph-BNHL      | bd403458-5154-488b-931a-a7e737a6bf8c | 14 | 69258223  | 69259538  | 25  | 1315  | 3  | 6  | 2  | 7  | 3  | 4  |
| Lymph-BNHL      | bd403458-5154-488b-931a-a7e737a6bf8c | 14 | 96107071  | 96107789  | 8   | 718   | 1  | 1  | NA | 2  | 4  | NA |
| Lymph-BNHL      | bd403458-5154-488b-931a-a7e737a6bf8c | 14 | 96178241  | 96180232  | 19  | 1991  | 1  | 2  | 4  | 4  | 6  | 2  |
| Lymph-BNHL      | bd403458-5154-488b-931a-a7e737a6bf8c | 14 | 106113089 | 106114751 | 8   | 1662  | 2  | 2  | 2  | 2  | NA | NA |
| Lymph-BNHL      | bd403458-5154-488b-931a-a7e737a6bf8c | 14 | 106208446 | 106239851 | 47  | 31405 | 5  | 11 | 22 | 2  | 3  | 4  |
| Lymph-BNHL      | bd403458-5154-488b-931a-a7e737a6bf8c | 14 | 106326629 | 106363883 | 124 | 37254 | 8  | 19 | 24 | 40 | 16 | 17 |
| Lymph-BNHL      | bd403458-5154-488b-931a-a7e737a6bf8c | 14 | 107131429 | 107132693 | 30  | 1264  | 3  | 7  | 7  | 7  | 1  | 5  |
| Lymph-BNHL      | bd403458-5154-488b-931a-a7e737a6bf8c | 14 | 107169986 | 107179917 | 33  | 9931  | 1  | 6  | 9  | 9  | 4  | 4  |
| Lymph-BNHL      | bd403458-5154-488b-931a-a7e737a6bf8c | 15 | 22532231  | 22535590  | 6   | 3359  | 3  | 2  | NA | NA | 1  | NA |
| Lymph-BNHL      | bd403458-5154-488b-931a-a7e737a6bf8c | 17 | 56408971  | 56409696  | 7   | 725   | NA | 2  | 5  | NA | NA | NA |
| Lymph-BNHL      | bd403458-5154-488b-931a-a7e737a6bf8c | 22 | 23198193  | 23199495  | 10  | 1302  | 2  | 3  | 3  | 1  | NA | 1  |
| Lymph-BNHL      | bd403458-5154-488b-931a-a7e737a6bf8c | 22 | 23220067  | 23282817  | 135 | 62750 | 7  | 16 | 34 | 32 | 23 | 23 |
| Lymph-BNHL      | bd403458-5154-488b-931a-a7e737a6bf8c | X  | 12993351  | 12994912  | 9   | 1561  | 1  | 2  | 4  | 1  | 1  | NA |
| Lymph-BNHL      | bd6bd940-ef06-433a-80d9-dca5683e9cd2 | 3  | 187461782 | 187462696 | 6   | 914   | NA | 1  | 3  | 2  | NA | NA |
| Lymph-BNHL      | bd6bd940-ef06-433a-80d9-dca5683e9cd2 | 14 | 106069050 | 106071165 | 11  | 2115  | NA | 1  | 10 | NA | NA | NA |
| Lymph-BNHL      | bd6bd940-ef06-433a-80d9-dca5683e9cd2 | 14 | 106324498 | 106330196 | 87  | 5698  | 6  | 22 | 40 | 6  | 6  | 7  |
| Lymph-BNHL      | bd6bd940-ef06-433a-80d9-dca5683e9cd2 | 14 | 106994193 | 106994885 | 7   | 692   | NA | 2  | 2  | 1  | 1  | 1  |
| Lymph-BNHL      | bd6bd940-ef06-433a-80d9-dca5683e9cd2 | 18 | 60984901  | 60988726  | 30  | 3825  | 3  | 3  | 14 | 6  | 3  | 1  |
| Lymph-BNHL      | bd6bd940-ef06-433a-80d9-dca5683e9cd2 | 22 | 22380726  | 22385647  | 7   | 4921  | NA | NA | 5  | 2  | NA | NA |
| Lymph-BNHL      | bdbccfb0-c7da-4e7d-8002-9effe48533c  | 14 | 106325793 | 106330101 | 35  | 4308  | 2  | 6  | 8  | 4  | 12 | 3  |
| Lymph-BNHL      | bdbccfb0-c7da-4e7d-8002-9effe48533c  | 14 | 106691995 | 106692268 | 9   | 273   | 1  | NA | 1  | 4  | 2  | 1  |
| Lymph-BNHL      | bdbccfb0-c7da-4e7d-8002-9effe48533c  | 18 | 60984884  | 60988229  | 6   | 3345  | NA | 3  | 2  | NA | NA | 1  |
| Liver-HCC       | bdeeb1a6-c622-11e3-bf01-24c6515278c0 | 16 | 75176306  | 75176770  | 8   | 464   | NA | NA | 1  | 2  | 4  | 1  |
| Prost-AdenoCA   | beafb7c6-ef39-478e-aa47-0f1ad39f95a3 | 2  | 196727991 | 196728625 | 6   | 634   | 1  | 1  | 4  | NA | NA | NA |
| Lung-AdenoCA    | bf7462a2-394f-4838-bcb6-4d0126fa48b1 | 1  | 240092967 | 240099169 | 23  | 6202  | 6  | 5  | 11 | NA | NA | 1  |
| Lung-AdenoCA    | bf7462a2-394f-4838-bcb6-4d0126fa48b1 | 6  | 19611418  | 19613354  | 6   | 1936  | NA | 1  | 2  | 1  | 2  | NA |
| Lung-AdenoCA    | bf7462a2-394f-4838-bcb6-4d0126fa48b1 | 9  | 6447422   | 6450993   | 10  | 3571  | NA | 3  | 7  | NA | NA | NA |

|                 |                                       |    |           |           |    |       |    |    |    |    |    |    |
|-----------------|---------------------------------------|----|-----------|-----------|----|-------|----|----|----|----|----|----|
| Lung-AdenoCA    | bf7462a2-394f-4838-bcb6-4d0126fa48b1  | 13 | 30412723  | 30413097  | 11 | 374   | NA | 5  | 6  | NA | NA | NA |
| Lung-AdenoCA    | bf7462a2-394f-4838-bcb6-4d0126fa48b1  | 16 | 90062956  | 90068484  | 7  | 5528  | 1  | 3  | 3  | NA | NA | NA |
| Lung-AdenoCA    | bf7462a2-394f-4838-bcb6-4d0126fa48b1  | 19 | 34267710  | 34268090  | 16 | 380   | NA | 4  | 11 | 1  | NA | NA |
| Lung-AdenoCA    | bf7462a2-394f-4838-bcb6-4d0126fa48b1  | 19 | 35977576  | 35978071  | 8  | 495   | NA | NA | 8  | NA | NA | NA |
| Ovary-AdenoCA   | bff518fb-6da7-4dfc-ae4c-bd3f641028e2  | 9  | 122221085 | 122223012 | 10 | 1927  | NA | 2  | 8  | NA | NA | NA |
| Liver-HCC       | c016d025-3c92-41c5-b846-493b1fccc79e  | 4  | 35004389  | 35005191  | 8  | 802   | 2  | 4  | 1  | NA | NA | 1  |
| Liver-HCC       | c016d025-3c92-41c5-b846-493b1fccc79e  | 5  | 30944949  | 30948645  | 14 | 3696  | NA | 3  | 2  | 4  | 5  | NA |
| Liver-HCC       | c016d025-3c92-41c5-b846-493b1fccc79e  | 5  | 37188369  | 37192197  | 13 | 3828  | NA | 8  | 4  | NA | 1  | NA |
| Liver-HCC       | c016d025-3c92-41c5-b846-493b1fccc79e  | 14 | 34361337  | 34362833  | 11 | 1496  | 3  | 4  | 3  | NA | 1  | NA |
| Liver-HCC       | c016d025-3c92-41c5-b846-493b1fccc79e  | 19 | 10139467  | 10143101  | 7  | 3634  | NA | 3  | 3  | 1  | NA | NA |
| Panc-AdenoCA    | c0523251-3ac2-4292-bb00-9ae9ea9009f6  | 12 | 72467650  | 72468626  | 9  | 976   | NA | 5  | 4  | NA | NA | NA |
| Panc-AdenoCA    | c0523251-3ac2-4292-bb00-9ae9ea9009f6  | 13 | 46041043  | 46042909  | 11 | 1866  | 2  | 2  | 7  | NA | NA | NA |
| Panc-AdenoCA    | c0523251-3ac2-4292-bb00-9ae9ea9009f6  | 16 | 87319905  | 87327398  | 9  | 7493  | NA | 3  | 6  | NA | NA | NA |
| Liver-HCC       | c05adc19-2e01-4712-a35a-69eee4d40998  | 1  | 98337528  | 98337736  | 8  | 208   | NA | 8  | NA | NA | NA | NA |
| Liver-HCC       | c05adc19-2e01-4712-a35a-69eee4d40998  | 1  | 190122704 | 190126969 | 9  | 4265  | 1  | NA | 7  | NA | NA | 1  |
| Liver-HCC       | c05adc19-2e01-4712-a35a-69eee4d40998  | 5  | 16237724  | 16239146  | 8  | 1422  | NA | NA | 7  | 1  | NA | NA |
| Liver-HCC       | c05adc19-2e01-4712-a35a-69eee4d40998  | 7  | 109018279 | 109019101 | 6  | 822   | NA | 1  | NA | 2  | NA | 3  |
| Liver-HCC       | c05adc19-2e01-4712-a35a-69eee4d40998  | 8  | 78436335  | 78438334  | 6  | 1999  | 1  | 5  | NA | NA | NA | NA |
| Liver-HCC       | c05adc19-2e01-4712-a35a-69eee4d40998  | 8  | 90866372  | 90871629  | 25 | 5257  | 3  | 14 | 8  | NA | NA | NA |
| Liver-HCC       | c05adc19-2e01-4712-a35a-69eee4d40998  | 11 | 70670058  | 70670950  | 9  | 892   | NA | NA | 9  | NA | NA | NA |
| Liver-HCC       | c05adc19-2e01-4712-a35a-69eee4d40998  | 11 | 75764506  | 75770271  | 9  | 5765  | NA | NA | NA | 2  | 6  | 1  |
| Liver-HCC       | c05adc19-2e01-4712-a35a-69eee4d40998  | 12 | 34767667  | 34770522  | 11 | 2855  | NA | NA | 11 | NA | NA | NA |
| Liver-HCC       | c05adc19-2e01-4712-a35a-69eee4d40998  | 13 | 40807311  | 40808413  | 7  | 1102  | 1  | NA | 6  | NA | NA | NA |
| Liver-HCC       | c05adc19-2e01-4712-a35a-69eee4d40998  | 17 | 53248273  | 53249023  | 7  | 750   | 1  | 3  | 3  | NA | NA | NA |
| Liver-HCC       | c05adc19-2e01-4712-a35a-69eee4d40998  | 17 | 53273189  | 53278253  | 7  | 5064  | NA | 3  | 4  | NA | NA | NA |
| Liver-HCC       | c05adc19-2e01-4712-a35a-69eee4d40998  | X  | 86711786  | 86713190  | 8  | 1404  | NA | 1  | 4  | 2  | NA | 1  |
| CNS-GBM         | c065761d-f775-457f-bda0-4c7c257a701e  | 1  | 50531169  | 50534859  | 6  | 3690  | NA | 5  | 1  | NA | NA | NA |
| CNS-GBM         | c065761d-f775-457f-bda0-4c7c257a701e  | 4  | 55500043  | 55503801  | 9  | 3758  | 2  | 3  | 4  | NA | NA | NA |
| CNS-GBM         | c065761d-f775-457f-bda0-4c7c257a701e  | 4  | 62900282  | 62907163  | 11 | 6881  | 1  | 7  | 2  | 1  | NA | NA |
| CNS-GBM         | c065761d-f775-457f-bda0-4c7c257a701e  | 4  | 116938129 | 116940920 | 8  | 2791  | 1  | 6  | NA | 1  | NA | NA |
| CNS-GBM         | c065761d-f775-457f-bda0-4c7c257a701e  | 4  | 116974093 | 116979589 | 7  | 5496  | 3  | 2  | 2  | NA | NA | NA |
| CNS-GBM         | c065761d-f775-457f-bda0-4c7c257a701e  | 4  | 131507359 | 131508878 | 14 | 1519  | 1  | 7  | 6  | NA | NA | NA |
| CNS-GBM         | c065761d-f775-457f-bda0-4c7c257a701e  | 4  | 139003871 | 139005066 | 7  | 1195  | NA | 5  | 2  | NA | NA | NA |
| CNS-GBM         | c065761d-f775-457f-bda0-4c7c257a701e  | 13 | 37720849  | 37730547  | 13 | 9698  | 1  | 5  | 5  | NA | 1  | 1  |
| CNS-GBM         | c065761d-f775-457f-bda0-4c7c257a701e  | 13 | 81307869  | 81309779  | 7  | 1910  | 1  | 3  | 3  | NA | NA | NA |
| CNS-GBM         | c065761d-f775-457f-bda0-4c7c257a701e  | 13 | 91408493  | 91411509  | 7  | 3016  | 1  | 1  | 5  | NA | NA | NA |
| Lymph-CLL       | c13d7ee5-2bf0-43e4-9cd3-9326ed9355cf  | 2  | 89159470  | 89165491  | 32 | 6021  | NA | 8  | 10 | 10 | NA | 4  |
| Lymph-CLL       | c13d7ee5-2bf0-43e4-9cd3-9326ed9355cf  | 14 | 106324978 | 106330413 | 49 | 5435  | 2  | 8  | 14 | 15 | 6  | 4  |
| Lymph-CLL       | c13d7ee5-2bf0-43e4-9cd3-9326ed9355cf  | 19 | 38133349  | 38134102  | 8  | 753   | NA | 1  | NA | 6  | NA | 1  |
| Panc-AdenoCA    | c13fb736-614c-4d5f-83bf-2d7586f4fb53  | 2  | 115302759 | 115306169 | 20 | 3410  | NA | 5  | 15 | NA | NA | NA |
| Panc-AdenoCA    | c13fb736-614c-4d5f-83bf-2d7586f4fb53  | 6  | 105936682 | 105937793 | 9  | 1111  | NA | 5  | 4  | NA | NA | NA |
| Panc-AdenoCA    | c13fb736-614c-4d5f-83bf-2d7586f4fb53  | 6  | 152259258 | 152263926 | 63 | 4668  | 16 | 19 | 28 | NA | NA | NA |
| Panc-AdenoCA    | c13fb736-614c-4d5f-83bf-2d7586f4fb53  | 9  | 21302510  | 21302574  | 6  | 64    | 1  | NA | 5  | NA | NA | NA |
| Panc-AdenoCA    | c13fb736-614c-4d5f-83bf-2d7586f4fb53  | 11 | 29337320  | 29338239  | 13 | 919   | 2  | 3  | 8  | NA | NA | NA |
| Panc-AdenoCA    | c13fb736-614c-4d5f-83bf-2d7586f4fb53  | 12 | 125051135 | 125053198 | 9  | 2063  | NA | NA | 9  | NA | NA | NA |
| Panc-AdenoCA    | c13fb736-614c-4d5f-83bf-2d7586f4fb53  | 18 | 48552898  | 48553481  | 6  | 583   | 1  | 1  | 4  | NA | NA | NA |
| Panc-AdenoCA    | c13fb736-614c-4d5f-83bf-2d7586f4fb53  | 22 | 41292851  | 41293289  | 8  | 438   | NA | 5  | 3  | NA | NA | NA |
| Panc-AdenoCA    | c13fb736-614c-4d5f-83bf-2d7586f4fb53  | X  | 14240746  | 14241141  | 6  | 395   | 2  | 1  | 3  | NA | NA | NA |
| Panc-AdenoCA    | c15a51cc-4fdc-4343-a410-13ddc238dac8  | 18 | 18646424  | 18650124  | 6  | 3700  | 4  | NA | 2  | NA | NA | NA |
| Panc-AdenoCA    | c15a51cc-4fdc-4343-a410-13ddc238dac8  | 18 | 39017012  | 39023877  | 34 | 6865  | 6  | 14 | 14 | NA | NA | NA |
| Panc-AdenoCA    | c15a51cc-4fdc-4343-a410-13ddc238dac8  | 18 | 73853841  | 73855017  | 11 | 1176  | 2  | 2  | 6  | NA | NA | 1  |
| Panc-AdenoCA    | c15a51cc-4fdc-4343-a410-13ddc238dac8  | 18 | 76082951  | 76128002  | 63 | 45051 | 6  | 26 | 30 | NA | 1  | NA |
| Stomach-AdenoCA | c1b44966-0f72-4c4f-8783-ab3ffe7f117b2 | 1  | 246417294 | 246417935 | 9  | 641   | 2  | 6  | 1  | NA | NA | NA |
| Stomach-AdenoCA | c1b44966-0f72-4c4f-8783-ab3ffe7f117b2 | 3  | 55163890  | 55168471  | 30 | 4581  | 3  | 16 | 9  | 1  | NA | 1  |
| Stomach-AdenoCA | c1b44966-0f72-4c4f-8783-ab3ffe7f117b2 | 12 | 69823869  | 69824012  | 6  | 143   | NA | 2  | 4  | NA | NA | NA |
| Stomach-AdenoCA | c1b44966-0f72-4c4f-8783-ab3ffe7f117b2 | 12 | 69908904  | 69914756  | 7  | 5852  | NA | 1  | 5  | NA | 1  | NA |
| Liver-HCC       | c1d9ed06-7498-4c6c-a0de-dbf28e868109  | 2  | 41195720  | 41196345  | 8  | 625   | NA | NA | 8  | NA | NA | NA |
| Liver-HCC       | c1d9ed06-7498-4c6c-a0de-dbf28e868109  | 18 | 20840757  | 20841054  | 6  | 297   | NA | NA | 1  | 1  | 4  | NA |
| Head-SCC        | c2124bb2-30e1-4093-9a8a-3a188a6dc0a9  | 10 | 42948770  | 42953429  | 7  | 4659  | 1  | 2  | 4  | NA | NA | NA |
| Head-SCC        | c2124bb2-30e1-4093-9a8a-3a188a6dc0a9  | 10 | 53176610  | 53177552  | 16 | 942   | NA | 6  | 10 | NA | NA | NA |

|                 |                                      |    |           |           |    |       |    |    |    |    |    |    |
|-----------------|--------------------------------------|----|-----------|-----------|----|-------|----|----|----|----|----|----|
| Head-SCC        | c2124bb2-30e1-4093-9a8a-3a188a6dc0a9 | 11 | 70342675  | 70344454  | 9  | 1779  | 2  | 2  | 5  | NA | NA | NA |
| Head-SCC        | c2124bb2-30e1-4093-9a8a-3a188a6dc0a9 | 12 | 38713025  | 38715339  | 6  | 2314  | NA | 3  | 3  | NA | NA | NA |
| Head-SCC        | c2124bb2-30e1-4093-9a8a-3a188a6dc0a9 | 12 | 45645067  | 45656941  | 26 | 11874 | NA | 11 | 15 | NA | NA | NA |
| CNS-GBM         | c27290e4-6835-448a-abdc-df8ddd5f4630 | 1  | 198130207 | 198134489 | 6  | 4282  | NA | NA | 1  | 2  | 2  | 1  |
| CNS-GBM         | c27290e4-6835-448a-abdc-df8ddd5f4630 | 7  | 50465120  | 50468575  | 6  | 3455  | 1  | 1  | 4  | NA | NA | NA |
| CNS-GBM         | c27290e4-6835-448a-abdc-df8ddd5f4630 | 7  | 80531022  | 80532602  | 10 | 1580  | 2  | 5  | 3  | NA | NA | NA |
| Kidney-RCC      | c2aafb9c-230a-43df-9a43-b34aa145a7bd | 3  | 120797276 | 120798925 | 6  | 1649  | 3  | 2  | 1  | NA | NA | NA |
| Panc-AdenoCA    | c3679262-63d7-463e-9501-6ab3f177aee8 | 1  | 46139441  | 46140103  | 7  | 662   | NA | 5  | 2  | NA | NA | NA |
| Panc-AdenoCA    | c3679262-63d7-463e-9501-6ab3f177aee8 | 4  | 132465235 | 132465960 | 9  | 725   | 1  | 4  | 4  | NA | NA | NA |
| Panc-AdenoCA    | c3679262-63d7-463e-9501-6ab3f177aee8 | 8  | 125506406 | 125507257 | 12 | 851   | 5  | 3  | 4  | NA | NA | NA |
| Panc-AdenoCA    | c3679262-63d7-463e-9501-6ab3f177aee8 | 8  | 130720538 | 130731530 | 15 | 10992 | 2  | 6  | 7  | NA | NA | NA |
| Lung-AdenoCA    | c437535b-2acc-4236-beae-94e2c1336830 | 1  | 37302464  | 37305863  | 13 | 3399  | 1  | 6  | 6  | NA | NA | NA |
| Lung-AdenoCA    | c437535b-2acc-4236-beae-94e2c1336830 | 2  | 222218135 | 222225163 | 11 | 7028  | 1  | 2  | 8  | NA | NA | NA |
| Lung-AdenoCA    | c437535b-2acc-4236-beae-94e2c1336830 | 4  | 181833079 | 181836861 | 6  | 3782  | 1  | 4  | 1  | NA | NA | NA |
| Lung-AdenoCA    | c437535b-2acc-4236-beae-94e2c1336830 | 7  | 129071105 | 129072176 | 19 | 1071  | 2  | 11 | 6  | NA | NA | NA |
| Lung-AdenoCA    | c437535b-2acc-4236-beae-94e2c1336830 | 7  | 153459593 | 153462285 | 11 | 2692  | NA | NA | 4  | 3  | 3  | 1  |
| Lung-AdenoCA    | c437535b-2acc-4236-beae-94e2c1336830 | 8  | 33510024  | 33511773  | 7  | 1749  | 2  | 3  | 2  | NA | NA | NA |
| Lung-AdenoCA    | c437535b-2acc-4236-beae-94e2c1336830 | 11 | 57986786  | 57989929  | 6  | 3143  | 1  | 1  | 4  | NA | NA | NA |
| Lung-AdenoCA    | c437535b-2acc-4236-beae-94e2c1336830 | 12 | 71478526  | 71478669  | 6  | 143   | NA | NA | 6  | NA | NA | NA |
| Lung-AdenoCA    | c437535b-2acc-4236-beae-94e2c1336830 | 14 | 72614197  | 72618492  | 8  | 4295  | 1  | 4  | 3  | NA | NA | NA |
| Lung-AdenoCA    | c437535b-2acc-4236-beae-94e2c1336830 | 18 | 1309248   | 1312289   | 7  | 3041  | NA | 4  | 1  | 1  | 1  | NA |
| Lung-AdenoCA    | c437535b-2acc-4236-beae-94e2c1336830 | 19 | 29261816  | 29262261  | 6  | 445   | 2  | 1  | 3  | NA | NA | NA |
| Lung-AdenoCA    | c437535b-2acc-4236-beae-94e2c1336830 | 19 | 29614890  | 29615851  | 8  | 961   | NA | 7  | 1  | NA | NA | NA |
| Bone-Leiomyo    | c556f81b-8a6c-4bbb-876f-2e2ce570c185 | 1  | 156995591 | 156996408 | 6  | 817   | 3  | 1  | 2  | NA | NA | NA |
| Bone-Leiomyo    | c556f81b-8a6c-4bbb-876f-2e2ce570c185 | 1  | 164598648 | 164604465 | 9  | 5817  | NA | NA | 9  | NA | NA | NA |
| Bone-Leiomyo    | c556f81b-8a6c-4bbb-876f-2e2ce570c185 | 1  | 195844800 | 195849020 | 11 | 4220  | 2  | 5  | 4  | NA | NA | NA |
| Bone-Leiomyo    | c556f81b-8a6c-4bbb-876f-2e2ce570c185 | 12 | 62153537  | 62154978  | 7  | 1441  | NA | NA | 7  | NA | NA | NA |
| Bone-Leiomyo    | c556f81b-8a6c-4bbb-876f-2e2ce570c185 | 12 | 65723981  | 65728088  | 10 | 4107  | NA | 7  | 3  | NA | NA | NA |
| Bone-Leiomyo    | c556f81b-8a6c-4bbb-876f-2e2ce570c185 | 12 | 66306049  | 66306816  | 13 | 767   | 3  | 6  | 4  | NA | NA | NA |
| Bone-Leiomyo    | c556f81b-8a6c-4bbb-876f-2e2ce570c185 | 12 | 66666448  | 66667015  | 7  | 567   | 1  | 2  | 4  | NA | NA | NA |
| Bone-Leiomyo    | c556f81b-8a6c-4bbb-876f-2e2ce570c185 | 12 | 73550601  | 73552462  | 7  | 1861  | 1  | 3  | 3  | NA | NA | NA |
| Bone-Leiomyo    | c556f81b-8a6c-4bbb-876f-2e2ce570c185 | 21 | 43275772  | 43277501  | 8  | 1729  | 1  | 2  | 5  | NA | NA | NA |
| Stomach-AdenoCA | c612570a-881d-421f-98b9-0e4563133744 | 4  | 146415510 | 146418351 | 13 | 2841  | 3  | 6  | 4  | NA | NA | NA |
| Lymph-BNHL      | c66926a8-474d-482c-bfb7-043029c8b737 | 2  | 89157513  | 89165241  | 28 | 7728  | 4  | 3  | 14 | 3  | NA | 4  |
| Lymph-BNHL      | c66926a8-474d-482c-bfb7-043029c8b737 | 5  | 85163388  | 85165284  | 8  | 1896  | NA | NA | NA | 3  | 4  | 1  |
| Lymph-BNHL      | c66926a8-474d-482c-bfb7-043029c8b737 | 9  | 112811640 | 112815174 | 6  | 3534  | 1  | 2  | 3  | NA | NA | NA |
| Lymph-BNHL      | c66926a8-474d-482c-bfb7-043029c8b737 | 14 | 106066364 | 106071897 | 14 | 5533  | 2  | 3  | 9  | NA | NA | NA |
| Lymph-BNHL      | c66926a8-474d-482c-bfb7-043029c8b737 | 14 | 106326703 | 106329236 | 23 | 2533  | 1  | 2  | 13 | 4  | 2  | 1  |
| Lymph-BNHL      | c66926a8-474d-482c-bfb7-043029c8b737 | 14 | 106815753 | 106816486 | 7  | 733   | 1  | 2  | 2  | 1  | NA | 1  |
| Lymph-BNHL      | c66926a8-474d-482c-bfb7-043029c8b737 | 16 | 10972311  | 10974883  | 19 | 2572  | 7  | 7  | 5  | NA | NA | NA |
| Breast-AdenoCa  | c67409b2-ac25-42a0-8543-4636ef132fe4 | 6  | 96363827  | 96368017  | 8  | 4190  | NA | 8  | NA | NA | NA | NA |
| Breast-AdenoCa  | c67409b2-ac25-42a0-8543-4636ef132fe4 | 8  | 41038734  | 41044850  | 8  | 6116  | 1  | 5  | 2  | NA | NA | NA |
| Prost-AdenoCA   | c6a28615-1b92-4085-956e-eeedb2573c03 | 5  | 128806040 | 128810352 | 6  | 4312  | NA | 3  | 3  | NA | NA | NA |
| Prost-AdenoCA   | c6a28615-1b92-4085-956e-eeedb2573c03 | 5  | 128813103 | 128819440 | 11 | 6337  | 1  | 6  | 4  | NA | NA | NA |
| Panc-AdenoCA    | c741fb12-8160-43a7-bc70-2c545ea0031d | 2  | 185702265 | 185702810 | 7  | 545   | 2  | 3  | 2  | NA | NA | NA |
| Panc-AdenoCA    | c741fb12-8160-43a7-bc70-2c545ea0031d | 18 | 8447033   | 8447291   | 9  | 258   | 2  | 4  | 3  | NA | NA | NA |
| Panc-AdenoCA    | c741fb12-8160-43a7-bc70-2c545ea0031d | 18 | 19404183  | 19404454  | 8  | 271   | NA | 3  | 5  | NA | NA | NA |
| Panc-AdenoCA    | c741fb12-8160-43a7-bc70-2c545ea0031d | 18 | 23060055  | 23060451  | 7  | 396   | 1  | 1  | 5  | NA | NA | NA |
| Panc-AdenoCA    | c741fb12-8160-43a7-bc70-2c545ea0031d | X  | 49060561  | 49064321  | 14 | 3760  | 5  | 8  | 1  | NA | NA | NA |
| Panc-AdenoCA    | c741fb12-8160-43a7-bc70-2c545ea0031d | X  | 52096267  | 52097498  | 15 | 1231  | 3  | 5  | 7  | NA | NA | NA |
| Panc-AdenoCA    | c741fb12-8160-43a7-bc70-2c545ea0031d | X  | 86951229  | 86952833  | 22 | 1604  | 2  | 9  | 11 | NA | NA | NA |
| Panc-AdenoCA    | c741fb12-8160-43a7-bc70-2c545ea0031d | X  | 87065861  | 87066693  | 8  | 832   | NA | 4  | 4  | NA | NA | NA |
| Panc-AdenoCA    | c741fb12-8160-43a7-bc70-2c545ea0031d | X  | 87271327  | 87272420  | 18 | 1093  | 2  | 7  | 8  | 1  | NA | NA |
| Panc-AdenoCA    | c741fb12-8160-43a7-bc70-2c545ea0031d | X  | 87314050  | 87316227  | 23 | 2177  | 5  | 7  | 11 | NA | NA | NA |
| Uterus-AdenoCA  | c75cc75a-7496-420f-b526-ea63c77e9839 | 19 | 57605973  | 57611150  | 10 | 5177  | 1  | 6  | 3  | NA | NA | NA |
| Ovary-AdenoCA   | c767254e-b289-4904-a80f-050cf01ff8ba | 2  | 103032646 | 103036798 | 11 | 4152  | 1  | 8  | 2  | NA | NA | NA |
| Ovary-AdenoCA   | c767254e-b289-4904-a80f-050cf01ff8ba | 7  | 119460457 | 119462539 | 6  | 2082  | 2  | NA | 1  | NA | 2  | 1  |
| Head-SCC        | c76f7fcc-2748-4b6d-805e-d21652dd5e3a | 2  | 172976016 | 172977031 | 9  | 1015  | 1  | 2  | 5  | NA | NA | 1  |
| Head-SCC        | c76f7fcc-2748-4b6d-805e-d21652dd5e3a | 7  | 55053607  | 55054275  | 7  | 668   | 3  | 2  | 2  | NA | NA | NA |
| Head-SCC        | c76f7fcc-2748-4b6d-805e-d21652dd5e3a | 7  | 55218998  | 55219865  | 8  | 867   | 1  | 3  | 4  | NA | NA | NA |

|               |                                      |    |           |           |    |       |    |    |    |    |    |    |
|---------------|--------------------------------------|----|-----------|-----------|----|-------|----|----|----|----|----|----|
| Head-SCC      | c76f7fcc-2748-4b6d-805e-d21652dd5e3a | 11 | 28441346  | 28443964  | 14 | 2618  | NA | 9  | 4  | NA | NA | 1  |
| Head-SCC      | c76f7fcc-2748-4b6d-805e-d21652dd5e3a | 15 | 87161539  | 87162027  | 10 | 488   | 3  | 3  | 4  | NA | NA | NA |
| Ovary-AdenoCA | c9959f68-c385-4c1f-9188-8203844d288e | 2  | 119235455 | 119248334 | 25 | 12879 | 3  | 7  | 15 | NA | NA | NA |
| Ovary-AdenoCA | c9959f68-c385-4c1f-9188-8203844d288e | 21 | 46788946  | 46794133  | 9  | 5187  | NA | 5  | 4  | NA | NA | NA |
| Panc-AdenoCA  | c9e7c629-7b57-4ede-b315-0cea8c97c48e | 2  | 9288153   | 9290968   | 14 | 2815  | NA | 7  | 7  | NA | NA | NA |
| Panc-AdenoCA  | c9e7c629-7b57-4ede-b315-0cea8c97c48e | 2  | 9491207   | 9491996   | 10 | 789   | NA | 6  | 4  | NA | NA | NA |
| Panc-AdenoCA  | c9e7c629-7b57-4ede-b315-0cea8c97c48e | 3  | 167852968 | 167858393 | 21 | 5425  | 1  | 6  | 14 | NA | NA | NA |
| Panc-AdenoCA  | c9e7c629-7b57-4ede-b315-0cea8c97c48e | 21 | 27815396  | 27818283  | 13 | 2887  | 2  | 4  | 7  | NA | NA | NA |
| Skin-Melanoma | ca004926-f3ac-4824-8ed5-d84e62efdfae | 2  | 86255084  | 86257767  | 19 | 2683  | 2  | 8  | 9  | NA | NA | NA |
| Skin-Melanoma | ca004926-f3ac-4824-8ed5-d84e62efdfae | 2  | 175192321 | 175196099 | 12 | 3778  | 1  | 6  | 5  | NA | NA | NA |
| Skin-Melanoma | ca004926-f3ac-4824-8ed5-d84e62efdfae | 3  | 131594499 | 131597328 | 13 | 2829  | 5  | 3  | 5  | NA | NA | NA |
| Skin-Melanoma | ca004926-f3ac-4824-8ed5-d84e62efdfae | 3  | 180741298 | 180741882 | 7  | 584   | 1  | 2  | 4  | NA | NA | NA |
| Skin-Melanoma | ca004926-f3ac-4824-8ed5-d84e62efdfae | 6  | 90039657  | 90054884  | 19 | 15227 | 2  | 12 | 5  | NA | NA | NA |
| Skin-Melanoma | ca004926-f3ac-4824-8ed5-d84e62efdfae | 7  | 128986    | 132018    | 6  | 3032  | 1  | 3  | 2  | NA | NA | NA |
| Skin-Melanoma | ca004926-f3ac-4824-8ed5-d84e62efdfae | 7  | 69739988  | 69742041  | 18 | 2053  | 2  | 9  | 6  | NA | 1  | NA |
| Skin-Melanoma | ca004926-f3ac-4824-8ed5-d84e62efdfae | 7  | 69934052  | 69934602  | 9  | 550   | NA | 8  | 1  | NA | NA | NA |
| Skin-Melanoma | ca004926-f3ac-4824-8ed5-d84e62efdfae | 7  | 70217318  | 70217934  | 7  | 616   | 1  | 4  | 2  | NA | NA | NA |
| Skin-Melanoma | ca004926-f3ac-4824-8ed5-d84e62efdfae | 7  | 87962925  | 87969605  | 14 | 6680  | NA | 7  | 7  | NA | NA | NA |
| Skin-Melanoma | ca004926-f3ac-4824-8ed5-d84e62efdfae | 9  | 31654323  | 31654649  | 8  | 326   | 2  | 4  | 2  | NA | NA | NA |
| Skin-Melanoma | ca004926-f3ac-4824-8ed5-d84e62efdfae | 10 | 61723474  | 61725674  | 9  | 2200  | NA | 7  | 2  | NA | NA | NA |
| Skin-Melanoma | ca004926-f3ac-4824-8ed5-d84e62efdfae | 11 | 60674306  | 60686872  | 21 | 12566 | 1  | 8  | 12 | NA | NA | NA |
| Skin-Melanoma | ca004926-f3ac-4824-8ed5-d84e62efdfae | 11 | 68565639  | 68566988  | 10 | 1349  | 2  | 1  | 7  | NA | NA | NA |
| Skin-Melanoma | ca004926-f3ac-4824-8ed5-d84e62efdfae | 11 | 71131417  | 71135711  | 8  | 4294  | 1  | 1  | 6  | NA | NA | NA |
| Skin-Melanoma | ca004926-f3ac-4824-8ed5-d84e62efdfae | 11 | 71181953  | 71182211  | 7  | 258   | 1  | 2  | 4  | NA | NA | NA |
| Skin-Melanoma | ca004926-f3ac-4824-8ed5-d84e62efdfae | 11 | 71265725  | 71269336  | 10 | 3611  | NA | NA | 10 | NA | NA | NA |
| Skin-Melanoma | ca004926-f3ac-4824-8ed5-d84e62efdfae | 11 | 76186682  | 76187378  | 7  | 696   | NA | NA | 7  | NA | NA | NA |
| Skin-Melanoma | ca004926-f3ac-4824-8ed5-d84e62efdfae | 11 | 76407395  | 76411643  | 8  | 4248  | NA | 1  | 7  | NA | NA | NA |
| Skin-Melanoma | ca004926-f3ac-4824-8ed5-d84e62efdfae | 12 | 50801143  | 50805262  | 8  | 4119  | 1  | 3  | 3  | NA | NA | 1  |
| Skin-Melanoma | ca004926-f3ac-4824-8ed5-d84e62efdfae | 12 | 67112682  | 67116322  | 12 | 3640  | NA | NA | 12 | NA | NA | NA |
| Skin-Melanoma | ca004926-f3ac-4824-8ed5-d84e62efdfae | 12 | 77853722  | 77857180  | 8  | 3458  | 1  | 4  | 3  | NA | NA | NA |
| Skin-Melanoma | ca004926-f3ac-4824-8ed5-d84e62efdfae | 12 | 78347277  | 78349351  | 10 | 2074  | NA | NA | 10 | NA | NA | NA |
| Skin-Melanoma | ca004926-f3ac-4824-8ed5-d84e62efdfae | 12 | 89614125  | 89622391  | 16 | 8266  | 1  | 7  | 7  | NA | NA | 1  |
| Skin-Melanoma | ca004926-f3ac-4824-8ed5-d84e62efdfae | 13 | 77492229  | 77495373  | 8  | 3144  | NA | 1  | 7  | NA | NA | NA |
| Skin-Melanoma | ca004926-f3ac-4824-8ed5-d84e62efdfae | 17 | 59477512  | 59477921  | 6  | 409   | 2  | 2  | 2  | NA | NA | NA |
| Skin-Melanoma | ca004926-f3ac-4824-8ed5-d84e62efdfae | 17 | 59495338  | 59504714  | 26 | 9376  | 3  | 11 | 12 | NA | NA | NA |
| Skin-Melanoma | ca004926-f3ac-4824-8ed5-d84e62efdfae | 21 | 14613651  | 14616455  | 10 | 2804  | NA | 5  | 5  | NA | NA | NA |
| Skin-Melanoma | ca004926-f3ac-4824-8ed5-d84e62efdfae | X  | 95247292  | 95252786  | 11 | 5494  | 1  | 4  | 6  | NA | NA | NA |
| Skin-Melanoma | ca004926-f3ac-4824-8ed5-d84e62efdfae | X  | 124110285 | 124112330 | 8  | 2045  | NA | 2  | 6  | NA | NA | NA |
| Panc-AdenoCA  | ca284012-bd06-47a3-8a9d-c6b185d87d85 | 6  | 52390387  | 52391335  | 7  | 948   | 1  | 1  | 5  | NA | NA | NA |
| Panc-AdenoCA  | ca284012-bd06-47a3-8a9d-c6b185d87d85 | 6  | 120365372 | 120366297 | 10 | 925   | 1  | 4  | 5  | NA | NA | NA |
| Panc-AdenoCA  | cafe9603-a804-48fb-9217-e2d1c3c346c5 | 1  | 194278806 | 194281057 | 6  | 2251  | 3  | NA | 3  | NA | NA | NA |
| Panc-AdenoCA  | cafe9603-a804-48fb-9217-e2d1c3c346c5 | 5  | 63952385  | 63953743  | 6  | 1358  | 1  | NA | 5  | NA | NA | NA |
| Panc-AdenoCA  | cafe9603-a804-48fb-9217-e2d1c3c346c5 | 5  | 81218700  | 81220543  | 8  | 1843  | NA | NA | 8  | NA | NA | NA |
| Panc-AdenoCA  | cafe9603-a804-48fb-9217-e2d1c3c346c5 | 8  | 39409370  | 39411084  | 10 | 1714  | 1  | NA | 9  | NA | NA | NA |
| Panc-AdenoCA  | cafe9603-a804-48fb-9217-e2d1c3c346c5 | 8  | 133174116 | 133178410 | 11 | 4294  | 3  | 1  | 7  | NA | NA | NA |
| Panc-AdenoCA  | cafe9603-a804-48fb-9217-e2d1c3c346c5 | 9  | 10481857  | 10490307  | 13 | 8450  | 2  | NA | 11 | NA | NA | NA |
| Panc-AdenoCA  | cafe9603-a804-48fb-9217-e2d1c3c346c5 | 9  | 12590407  | 12593381  | 7  | 2974  | 1  | NA | 6  | NA | NA | NA |
| Panc-AdenoCA  | cafe9603-a804-48fb-9217-e2d1c3c346c5 | 13 | 22546263  | 22554219  | 11 | 7956  | NA | NA | 11 | NA | NA | NA |
| Panc-AdenoCA  | cafe9603-a804-48fb-9217-e2d1c3c346c5 | 13 | 38174856  | 38180702  | 7  | 5846  | NA | NA | 7  | NA | NA | NA |
| Panc-AdenoCA  | cafe9603-a804-48fb-9217-e2d1c3c346c5 | 13 | 39619585  | 39623569  | 9  | 3984  | NA | NA | 8  | NA | 1  | NA |
| Panc-AdenoCA  | cafe9603-a804-48fb-9217-e2d1c3c346c5 | 13 | 62546270  | 62554610  | 12 | 8340  | NA | NA | 12 | NA | NA | NA |
| Panc-AdenoCA  | cafe9603-a804-48fb-9217-e2d1c3c346c5 | 13 | 69509946  | 69515155  | 13 | 5209  | NA | NA | 13 | NA | NA | NA |
| Panc-AdenoCA  | cafe9603-a804-48fb-9217-e2d1c3c346c5 | 13 | 85115712  | 85119239  | 9  | 3527  | NA | NA | 9  | NA | NA | NA |
| Panc-AdenoCA  | cafe9603-a804-48fb-9217-e2d1c3c346c5 | 13 | 96239271  | 96240436  | 10 | 1165  | 3  | 2  | 5  | NA | NA | NA |
| Panc-AdenoCA  | cafe9603-a804-48fb-9217-e2d1c3c346c5 | 19 | 21564230  | 21565718  | 11 | 1488  | NA | 6  | 4  | 1  | NA | NA |
| Panc-AdenoCA  | cafe9603-a804-48fb-9217-e2d1c3c346c5 | 19 | 22039311  | 22040090  | 9  | 779   | NA | 1  | 8  | NA | NA | NA |
| Panc-AdenoCA  | cafe9603-a804-48fb-9217-e2d1c3c346c5 | 19 | 22548886  | 22549583  | 13 | 697   | 2  | 1  | 10 | NA | NA | NA |
| Panc-AdenoCA  | cafe9603-a804-48fb-9217-e2d1c3c346c5 | 22 | 47860444  | 47863247  | 9  | 2803  | 2  | 2  | 5  | NA | NA | NA |
| Eso-AdenoCa   | cb381d49-4546-400c-af02-f877083caa0a | 5  | 58817363  | 58820249  | 15 | 2886  | 2  | 7  | 4  | NA | 1  | 1  |
| Eso-AdenoCa   | cb381d49-4546-400c-af02-f877083caa0a | 16 | 68147646  | 68152692  | 17 | 5046  | 2  | 12 | 3  | NA | NA | NA |

|                |                                      |    |           |           |    |       |    |    |    |    |    |    |
|----------------|--------------------------------------|----|-----------|-----------|----|-------|----|----|----|----|----|----|
| Eso-AdenoCa    | cb381d49-4546-400c-af02-f877083caa0a | 17 | 46994260  | 46994745  | 7  | 485   | 4  | 1  | 2  | NA | NA | NA |
| Panc-AdenoCA   | cb4608a7-6aec-4cba-b20f-489e214c9dbd | 2  | 225634947 | 225635236 | 8  | 289   | NA | 3  | 5  | NA | NA | NA |
| Panc-AdenoCA   | cb4608a7-6aec-4cba-b20f-489e214c9dbd | 5  | 37408932  | 37411425  | 19 | 2493  | 1  | 10 | 8  | NA | NA | NA |
| Panc-AdenoCA   | cb4608a7-6aec-4cba-b20f-489e214c9dbd | 9  | 37286703  | 37292945  | 28 | 6242  | 4  | 6  | 18 | NA | NA | NA |
| Panc-AdenoCA   | cb4608a7-6aec-4cba-b20f-489e214c9dbd | 9  | 37368451  | 37369597  | 13 | 1146  | NA | 7  | 6  | NA | NA | NA |
| Bone-Leiomyo   | cb5e1546-cda6-4991-911c-f3dd9f1a475a | 1  | 195030687 | 195048268 | 19 | 17581 | 1  | 10 | 7  | NA | 1  | NA |
| Bone-Leiomyo   | cb5e1546-cda6-4991-911c-f3dd9f1a475a | 2  | 136577686 | 136588598 | 16 | 10912 | 6  | 3  | 5  | NA | NA | 2  |
| Bone-Leiomyo   | cb5e1546-cda6-4991-911c-f3dd9f1a475a | 9  | 17953000  | 17954628  | 7  | 1628  | 1  | 4  | 2  | NA | NA | NA |
| Bone-Leiomyo   | cb5e1546-cda6-4991-911c-f3dd9f1a475a | 9  | 21678222  | 21681200  | 12 | 2978  | 1  | 4  | 7  | NA | NA | NA |
| Bone-Leiomyo   | cb5e1546-cda6-4991-911c-f3dd9f1a475a | 9  | 71669987  | 71676376  | 15 | 6389  | 4  | 5  | 6  | NA | NA | NA |
| Bone-Leiomyo   | cb5e1546-cda6-4991-911c-f3dd9f1a475a | 9  | 71973853  | 71976388  | 10 | 2535  | NA | 8  | 2  | NA | NA | NA |
| Bone-Leiomyo   | cb5e1546-cda6-4991-911c-f3dd9f1a475a | 9  | 72769245  | 72774789  | 9  | 5544  | 2  | 1  | 6  | NA | NA | NA |
| Bone-Leiomyo   | cb5e1546-cda6-4991-911c-f3dd9f1a475a | 9  | 79435348  | 79438704  | 7  | 3356  | 3  | 1  | 3  | NA | NA | NA |
| Bone-Leiomyo   | cb5e1546-cda6-4991-911c-f3dd9f1a475a | 9  | 81293870  | 81297676  | 10 | 3806  | 3  | 2  | 5  | NA | NA | NA |
| Bone-Leiomyo   | cb5e1546-cda6-4991-911c-f3dd9f1a475a | 9  | 86245189  | 86247598  | 7  | 2409  | NA | 2  | 5  | NA | NA | NA |
| Bone-Leiomyo   | cb5e1546-cda6-4991-911c-f3dd9f1a475a | 9  | 87739173  | 87740984  | 8  | 1811  | 3  | NA | 5  | NA | NA | NA |
| Bone-Leiomyo   | cb5e1546-cda6-4991-911c-f3dd9f1a475a | 10 | 49478028  | 49478404  | 7  | 376   | NA | 4  | 2  | 1  | NA | NA |
| Bone-Leiomyo   | cb5e1546-cda6-4991-911c-f3dd9f1a475a | 10 | 49922616  | 49925695  | 10 | 3079  | 3  | NA | 7  | NA | NA | NA |
| Bone-Leiomyo   | cb5e1546-cda6-4991-911c-f3dd9f1a475a | 10 | 49951200  | 49959678  | 16 | 8478  | 1  | 1  | 13 | NA | NA | 1  |
| Bone-Leiomyo   | cb5e1546-cda6-4991-911c-f3dd9f1a475a | 11 | 43819512  | 43822657  | 11 | 3145  | 1  | 4  | 5  | 1  | NA | NA |
| Bone-Leiomyo   | cb5e1546-cda6-4991-911c-f3dd9f1a475a | 15 | 43043217  | 43045961  | 7  | 2744  | 1  | 2  | 4  | NA | NA | NA |
| Bone-Leiomyo   | cb5e1546-cda6-4991-911c-f3dd9f1a475a | 17 | 63040061  | 63044765  | 21 | 4704  | 1  | NA | 20 | NA | NA | NA |
| Bone-Leiomyo   | cb5e1546-cda6-4991-911c-f3dd9f1a475a | 20 | 8644783   | 8645093   | 6  | 310   | 1  | 2  | 3  | NA | NA | NA |
| Bone-Leiomyo   | cb5e1546-cda6-4991-911c-f3dd9f1a475a | 20 | 8791512   | 8791874   | 20 | 362   | NA | NA | 20 | NA | NA | NA |
| Bone-Leiomyo   | cb5e1546-cda6-4991-911c-f3dd9f1a475a | 20 | 14721674  | 14724477  | 9  | 2803  | NA | 2  | 7  | NA | NA | NA |
| Eso-AdenoCa    | cb753e6f-5ea3-4b58-9db3-7a62d15c8b2e | 1  | 185593236 | 185593456 | 8  | 220   | 1  | 5  | 2  | NA | NA | NA |
| Eso-AdenoCa    | cb753e6f-5ea3-4b58-9db3-7a62d15c8b2e | 7  | 82517649  | 82518186  | 10 | 537   | NA | 4  | 6  | NA | NA | NA |
| Eso-AdenoCa    | cb753e6f-5ea3-4b58-9db3-7a62d15c8b2e | 7  | 87646693  | 87648270  | 11 | 1577  | 2  | 7  | 2  | NA | NA | NA |
| Eso-AdenoCa    | cb753e6f-5ea3-4b58-9db3-7a62d15c8b2e | 18 | 20131421  | 20132805  | 11 | 1384  | 1  | 8  | 2  | NA | NA | NA |
| Eso-AdenoCa    | cb753e6f-5ea3-4b58-9db3-7a62d15c8b2e | 20 | 44690169  | 44691347  | 9  | 1178  | NA | 4  | 5  | NA | NA | NA |
| Eso-AdenoCa    | cb753e6f-5ea3-4b58-9db3-7a62d15c8b2e | X  | 58100777  | 58105560  | 8  | 4783  | 1  | 3  | 3  | 1  | NA | NA |
| Eso-AdenoCa    | cb753e6f-5ea3-4b58-9db3-7a62d15c8b2e | X  | 124735975 | 124736389 | 7  | 414   | 1  | NA | 6  | NA | NA | NA |
| Bone-Leiomyo   | cb783f8b-d092-4104-b809-3f90b19df7df | 1  | 205220366 | 205221029 | 8  | 663   | 1  | 1  | 6  | NA | NA | NA |
| Bone-Leiomyo   | cb783f8b-d092-4104-b809-3f90b19df7df | 1  | 237768880 | 237771769 | 8  | 2889  | 2  | 4  | 2  | NA | NA | NA |
| Bone-Leiomyo   | cb783f8b-d092-4104-b809-3f90b19df7df | 3  | 191900244 | 191903446 | 9  | 3202  | NA | NA | 2  | 2  | 4  | 1  |
| Bone-Leiomyo   | cb783f8b-d092-4104-b809-3f90b19df7df | 9  | 72778591  | 72780638  | 11 | 2047  | NA | 3  | 8  | NA | NA | NA |
| Bone-Leiomyo   | cb783f8b-d092-4104-b809-3f90b19df7df | 12 | 58429329  | 58433095  | 8  | 3766  | 1  | 3  | 4  | NA | NA | NA |
| Bone-Leiomyo   | cb783f8b-d092-4104-b809-3f90b19df7df | 12 | 67220782  | 67224977  | 9  | 4195  | NA | NA | 9  | NA | NA | NA |
| Bone-Leiomyo   | cb783f8b-d092-4104-b809-3f90b19df7df | 12 | 68838758  | 68842747  | 9  | 3989  | 1  | NA | 8  | NA | NA | NA |
| Bone-Leiomyo   | cb783f8b-d092-4104-b809-3f90b19df7df | 12 | 69705514  | 69710973  | 7  | 5459  | NA | 3  | 4  | NA | NA | NA |
| Bone-Leiomyo   | cb783f8b-d092-4104-b809-3f90b19df7df | 12 | 69785582  | 69791055  | 8  | 5473  | 1  | 1  | 2  | 1  | 2  | 1  |
| Bone-Leiomyo   | cb783f8b-d092-4104-b809-3f90b19df7df | 12 | 70540528  | 70543375  | 7  | 2847  | NA | 3  | 4  | NA | NA | NA |
| Bone-Leiomyo   | cb783f8b-d092-4104-b809-3f90b19df7df | 12 | 70575177  | 70575887  | 8  | 710   | NA | 4  | 4  | NA | NA | NA |
| Bone-Leiomyo   | cb783f8b-d092-4104-b809-3f90b19df7df | 12 | 84028335  | 84032584  | 7  | 4249  | 1  | 5  | 1  | NA | NA | NA |
| Bone-Leiomyo   | cb783f8b-d092-4104-b809-3f90b19df7df | 12 | 96439498  | 96450753  | 20 | 11255 | 2  | 10 | 8  | NA | NA | NA |
| Bone-Leiomyo   | cb783f8b-d092-4104-b809-3f90b19df7df | 12 | 99158093  | 99165600  | 10 | 7507  | 2  | 1  | 7  | NA | NA | NA |
| Bone-Leiomyo   | cb783f8b-d092-4104-b809-3f90b19df7df | 12 | 102768315 | 102771732 | 7  | 3417  | 1  | 4  | 2  | NA | NA | NA |
| Bone-Leiomyo   | cb783f8b-d092-4104-b809-3f90b19df7df | 12 | 103475670 | 103476665 | 9  | 995   | 1  | 8  | NA | NA | NA | NA |
| Bone-Leiomyo   | cb783f8b-d092-4104-b809-3f90b19df7df | 21 | 21250050  | 21251753  | 8  | 1703  | 2  | 3  | 3  | NA | NA | NA |
| Kidney-RCC     | ccb788dd-964b-4cfd-80e1-979c7b5b3c52 | 21 | 37029465  | 37032833  | 7  | 3368  | NA | 5  | 2  | NA | NA | NA |
| Uterus-AdenoCA | cc19a480-9c66-4ee8-a0c0-921acac02689 | 1  | 31555925  | 31563919  | 10 | 7994  | 1  | 3  | 6  | NA | NA | NA |
| Uterus-AdenoCA | cc19a480-9c66-4ee8-a0c0-921acac02689 | 3  | 127151706 | 127151862 | 6  | 156   | 1  | NA | 5  | NA | NA | NA |
| Uterus-AdenoCA | cc19a480-9c66-4ee8-a0c0-921acac02689 | 8  | 64141640  | 64142117  | 8  | 477   | 1  | 4  | 3  | NA | NA | NA |
| Uterus-AdenoCA | cc19a480-9c66-4ee8-a0c0-921acac02689 | 8  | 80665122  | 80665779  | 7  | 657   | 1  | 5  | 1  | NA | NA | NA |
| Uterus-AdenoCA | cc19a480-9c66-4ee8-a0c0-921acac02689 | 10 | 78891067  | 78895553  | 6  | 4486  | 1  | 2  | 3  | NA | NA | NA |
| Uterus-AdenoCA | cc19a480-9c66-4ee8-a0c0-921acac02689 | 18 | 26052400  | 26061162  | 35 | 8762  | 3  | 12 | 20 | NA | NA | NA |
| Uterus-AdenoCA | cc19a480-9c66-4ee8-a0c0-921acac02689 | 19 | 13337462  | 13345331  | 12 | 7869  | 2  | 2  | 8  | NA | NA | NA |
| Uterus-AdenoCA | cc19a480-9c66-4ee8-a0c0-921acac02689 | 19 | 29487825  | 29495891  | 21 | 8066  | NA | 8  | 13 | NA | NA | NA |
| Breast-AdenoCa | cc4f9175-a8c8-424a-99d7-8bd11cae0e52 | 2  | 9826712   | 9831890   | 7  | 5178  | NA | 2  | 5  | NA | NA | NA |
| Breast-AdenoCa | cc4f9175-a8c8-424a-99d7-8bd11cae0e52 | 3  | 160859397 | 160863445 | 6  | 4048  | 1  | NA | 5  | NA | NA | NA |

|                  |                                       |    |           |           |    |       |    |    |    |    |    |    |
|------------------|---------------------------------------|----|-----------|-----------|----|-------|----|----|----|----|----|----|
| Breast-AdenoCa   | cc4f9175-a8c8-424a-99d7-8bd11cae0e52  | 5  | 68419204  | 68423729  | 10 | 4525  | 1  | 4  | 5  | NA | NA | NA |
| Breast-AdenoCa   | cc4f9175-a8c8-424a-99d7-8bd11cae0e52  | 6  | 79100333  | 79106474  | 9  | 6141  | 2  | 6  | 1  | NA | NA | NA |
| Breast-AdenoCa   | cc4f9175-a8c8-424a-99d7-8bd11cae0e52  | 7  | 65894471  | 65896813  | 6  | 2342  | 2  | 2  | 2  | NA | NA | NA |
| Breast-AdenoCa   | cc4f9175-a8c8-424a-99d7-8bd11cae0e52  | 8  | 94265988  | 94268377  | 8  | 2389  | 1  | 3  | 3  | 1  | NA | NA |
| Breast-AdenoCa   | cc4f9175-a8c8-424a-99d7-8bd11cae0e52  | 8  | 96644318  | 96647661  | 7  | 3343  | NA | 4  | 3  | NA | NA | NA |
| Breast-AdenoCa   | cc4f9175-a8c8-424a-99d7-8bd11cae0e52  | 16 | 2582361   | 2587311   | 7  | 4950  | 1  | 2  | 4  | NA | NA | NA |
| Breast-AdenoCa   | cc4f9175-a8c8-424a-99d7-8bd11cae0e52  | 16 | 4451757   | 4456508   | 8  | 4751  | 1  | 1  | 6  | NA | NA | NA |
| Breast-AdenoCa   | cc4f9175-a8c8-424a-99d7-8bd11cae0e52  | 16 | 50833343  | 50833549  | 8  | 206   | 3  | 3  | 2  | NA | NA | NA |
| Breast-AdenoCa   | cc4f9175-a8c8-424a-99d7-8bd11cae0e52  | 18 | 68320366  | 68323115  | 7  | 2749  | 1  | 3  | 3  | NA | NA | NA |
| Breast-AdenoCa   | cc4f9175-a8c8-424a-99d7-8bd11cae0e52  | 19 | 13454045  | 13455780  | 8  | 1735  | 1  | 5  | 1  | NA | 1  | NA |
| Liver-HCC        | cc792058-c622-11e3-bf01-24c6515278c0  | 4  | 58740689  | 58745200  | 18 | 4511  | 2  | 10 | 6  | NA | NA | NA |
| Liver-HCC        | cc792058-c622-11e3-bf01-24c6515278c0  | 12 | 78750756  | 78751111  | 6  | 355   | 1  | 2  | 1  | NA | 2  | NA |
| Panc-AdenoCA     | cc7af465-22ed-485d-a78c-282b840bf7c9  | 2  | 14647694  | 14649259  | 8  | 1565  | NA | 5  | 3  | NA | NA | NA |
| Panc-AdenoCA     | cc7af465-22ed-485d-a78c-282b840bf7c9  | 17 | 32956050  | 32956856  | 14 | 806   | NA | NA | 14 | NA | NA | NA |
| Panc-AdenoCA     | cc7af465-22ed-485d-a78c-282b840bf7c9  | 17 | 33902576  | 33904556  | 33 | 1980  | NA | NA | 26 | 2  | 5  | NA |
| Panc-AdenoCA     | cc7af465-22ed-485d-a78c-282b840bf7c9  | 17 | 49531037  | 49531854  | 11 | 817   | NA | 4  | 7  | NA | NA | NA |
| Panc-AdenoCA     | cc7af465-22ed-485d-a78c-282b840bf7c9  | 17 | 52838716  | 52843097  | 9  | 4381  | 1  | 3  | 5  | NA | NA | NA |
| Lymph-BNHL       | cc7bba1d-8990-4557-a565-9cff1085f023  | 14 | 106324877 | 106330263 | 40 | 5386  | 2  | 5  | 13 | 10 | 3  | 7  |
| Lymph-BNHL       | cc7bba1d-8990-4557-a565-9cff1085f023  | 22 | 23039946  | 23040849  | 6  | 903   | NA | 1  | 3  | 2  | NA | NA |
| Lung-AdenoCA     | cd0aeeed5-93a1-4287-8a88-fe6b7b5e3983 | 5  | 1603470   | 1606799   | 8  | 3329  | NA | NA | 1  | 3  | 3  | 1  |
| Lung-AdenoCA     | cd0aeeed5-93a1-4287-8a88-fe6b7b5e3983 | 5  | 2558730   | 2560581   | 8  | 1851  | NA | 4  | 4  | NA | NA | NA |
| Lung-AdenoCA     | cd0aeeed5-93a1-4287-8a88-fe6b7b5e3983 | 5  | 4210446   | 4211399   | 9  | 953   | NA | 2  | 7  | NA | NA | NA |
| Lung-AdenoCA     | cd0aeeed5-93a1-4287-8a88-fe6b7b5e3983 | 5  | 18619744  | 18621651  | 22 | 1907  | NA | 1  | 21 | NA | NA | NA |
| Lung-AdenoCA     | cd0aeeed5-93a1-4287-8a88-fe6b7b5e3983 | 5  | 19655787  | 19658381  | 10 | 2594  | NA | 3  | 7  | NA | NA | NA |
| Lung-AdenoCA     | cd0aeeed5-93a1-4287-8a88-fe6b7b5e3983 | 5  | 25970956  | 25972932  | 7  | 1976  | NA | 2  | 4  | NA | 1  | NA |
| Lung-AdenoCA     | cd0aeeed5-93a1-4287-8a88-fe6b7b5e3983 | 7  | 4504423   | 4505388   | 11 | 965   | 3  | 3  | 5  | NA | NA | NA |
| Lung-AdenoCA     | cd0aeeed5-93a1-4287-8a88-fe6b7b5e3983 | 7  | 19611605  | 19638011  | 31 | 26406 | NA | 13 | 16 | 1  | NA | 1  |
| Lung-AdenoCA     | cd0aeeed5-93a1-4287-8a88-fe6b7b5e3983 | 8  | 2824721   | 2827434   | 8  | 2713  | NA | 2  | 6  | NA | NA | NA |
| Lung-AdenoCA     | cd0aeeed5-93a1-4287-8a88-fe6b7b5e3983 | 8  | 2891210   | 2896018   | 15 | 4808  | NA | 7  | 8  | NA | NA | NA |
| Lung-AdenoCA     | cd0aeeed5-93a1-4287-8a88-fe6b7b5e3983 | 8  | 2958252   | 2958532   | 7  | 280   | NA | 3  | 4  | NA | NA | NA |
| Lung-AdenoCA     | cd0aeeed5-93a1-4287-8a88-fe6b7b5e3983 | 9  | 90407783  | 90417722  | 25 | 9939  | NA | 6  | 17 | NA | 2  | NA |
| Lung-AdenoCA     | cd0aeeed5-93a1-4287-8a88-fe6b7b5e3983 | 9  | 101217678 | 101218640 | 17 | 962   | NA | 8  | 9  | NA | NA | NA |
| Lung-AdenoCA     | cd0aeeed5-93a1-4287-8a88-fe6b7b5e3983 | 9  | 129294708 | 129297109 | 8  | 2401  | NA | NA | 1  | 2  | 5  | NA |
| Lung-AdenoCA     | cd0aeeed5-93a1-4287-8a88-fe6b7b5e3983 | 9  | 130041490 | 130047221 | 12 | 5731  | NA | 4  | 6  | 2  | NA | NA |
| Lung-AdenoCA     | cd0aeeed5-93a1-4287-8a88-fe6b7b5e3983 | 12 | 64227020  | 64227361  | 6  | 341   | NA | 3  | 3  | NA | NA | NA |
| Lung-AdenoCA     | cd0aeeed5-93a1-4287-8a88-fe6b7b5e3983 | 12 | 68292048  | 68292742  | 8  | 694   | 1  | 6  | 1  | NA | NA | NA |
| Lung-AdenoCA     | cd0aeeed5-93a1-4287-8a88-fe6b7b5e3983 | 12 | 68731599  | 68731948  | 8  | 349   | 1  | 3  | 4  | NA | NA | NA |
| Lung-AdenoCA     | cd0aeeed5-93a1-4287-8a88-fe6b7b5e3983 | 12 | 69624905  | 69628863  | 9  | 3958  | NA | 1  | 5  | 1  | 2  | NA |
| Lung-AdenoCA     | cd0aeeed5-93a1-4287-8a88-fe6b7b5e3983 | 12 | 69639856  | 69642623  | 12 | 2767  | NA | 1  | 10 | 1  | NA | NA |
| Lung-AdenoCA     | cd0aeeed5-93a1-4287-8a88-fe6b7b5e3983 | 12 | 69809193  | 69812070  | 8  | 2877  | NA | 3  | 2  | 3  | NA | NA |
| Lung-AdenoCA     | cd0aeeed5-93a1-4287-8a88-fe6b7b5e3983 | 12 | 70125113  | 70129963  | 14 | 4850  | NA | 5  | 9  | NA | NA | NA |
| Lung-AdenoCA     | cd0aeeed5-93a1-4287-8a88-fe6b7b5e3983 | 12 | 72630469  | 72632392  | 16 | 1923  | NA | 6  | 9  | NA | NA | 1  |
| Lung-AdenoCA     | cd0aeeed5-93a1-4287-8a88-fe6b7b5e3983 | 12 | 77768826  | 77774616  | 37 | 5790  | NA | 11 | 21 | 1  | 3  | 1  |
| Lung-AdenoCA     | cd0aeeed5-93a1-4287-8a88-fe6b7b5e3983 | 12 | 82494871  | 82502318  | 29 | 7447  | NA | NA | 29 | NA | NA | NA |
| Lung-AdenoCA     | cd0aeeed5-93a1-4287-8a88-fe6b7b5e3983 | 15 | 24273594  | 24277001  | 7  | 3407  | NA | 1  | 2  | 1  | 3  | NA |
| Lung-AdenoCA     | cd0aeeed5-93a1-4287-8a88-fe6b7b5e3983 | 19 | 19773643  | 19773847  | 8  | 204   | 1  | 1  | 5  | NA | NA | 1  |
| Lung-AdenoCA     | cd0aeeed5-93a1-4287-8a88-fe6b7b5e3983 | X  | 2477660   | 2479834   | 6  | 2174  | NA | NA | 6  | NA | NA | NA |
| Lung-AdenoCA     | cd0aeeed5-93a1-4287-8a88-fe6b7b5e3983 | X  | 22992369  | 22997320  | 7  | 4951  | NA | 2  | 2  | 1  | 2  | NA |
| Lung-AdenoCA     | cd0aeeed5-93a1-4287-8a88-fe6b7b5e3983 | X  | 28091993  | 28095279  | 30 | 3286  | NA | 2  | 28 | NA | NA | NA |
| Lung-AdenoCA     | cd0aeeed5-93a1-4287-8a88-fe6b7b5e3983 | X  | 31162553  | 31165255  | 15 | 2702  | NA | NA | 14 | 1  | NA | NA |
| Lung-AdenoCA     | cd0aeeed5-93a1-4287-8a88-fe6b7b5e3983 | X  | 35468685  | 35469914  | 8  | 1229  | NA | NA | 2  | 1  | 5  | NA |
| Lung-AdenoCA     | cd0aeeed5-93a1-4287-8a88-fe6b7b5e3983 | X  | 35894749  | 35899785  | 17 | 5036  | NA | 1  | 16 | NA | NA | NA |
| ColoRect-AdenoCA | cd3d7559-b583-4474-81df-4bf9232de3c2  | 20 | 18545378  | 18549013  | 13 | 3635  | 5  | 3  | 5  | NA | NA | NA |
| Ovary-AdenoCA    | cd9efdef-a7fb-49e5-9515-63606ae8bbfc  | 1  | 106731111 | 106738028 | 9  | 6917  | 2  | 4  | 3  | NA | NA | NA |
| Bone-Leiomyo     | cdbbd701-9c05-4f9e-923d-06039dd8a04d  | 7  | 153317315 | 153323094 | 10 | 5779  | 1  | NA | 9  | NA | NA | NA |
| Bone-Leiomyo     | cdbbd701-9c05-4f9e-923d-06039dd8a04d  | 9  | 31844445  | 31845314  | 8  | 869   | NA | 4  | 4  | NA | NA | NA |
| Bone-Leiomyo     | cdbbd701-9c05-4f9e-923d-06039dd8a04d  | X  | 19772412  | 19779033  | 11 | 6621  | 1  | 10 | NA | NA | NA | NA |
| Eso-AdenoCa      | ce799e7b-30e7-44a5-a185-3e50d5e059ef  | 19 | 14506966  | 14507270  | 9  | 304   | 3  | NA | 6  | NA | NA | NA |
| Eso-AdenoCa      | ce799e7b-30e7-44a5-a185-3e50d5e059ef  | 19 | 28502092  | 28502478  | 10 | 386   | 1  | 4  | 5  | NA | NA | NA |
| Eso-AdenoCa      | ce799e7b-30e7-44a5-a185-3e50d5e059ef  | 20 | 14728497  | 14729718  | 10 | 1221  | 3  | NA | 7  | NA | NA | NA |

|                  |                                      |    |           |           |     |       |    |    |    |    |    |    |
|------------------|--------------------------------------|----|-----------|-----------|-----|-------|----|----|----|----|----|----|
| Lymph-BNHL       | ce85ccf3-6621-4976-b187-2f28d45dd4d9 | 2  | 89127134  | 89132087  | 9   | 4953  | NA | NA | 2  | 2  | 4  | 1  |
| Lymph-BNHL       | ce85ccf3-6621-4976-b187-2f28d45dd4d9 | 2  | 89157280  | 89160877  | 63  | 3597  | 3  | 10 | 7  | 16 | 11 | 16 |
| Lymph-BNHL       | ce85ccf3-6621-4976-b187-2f28d45dd4d9 | 2  | 96810052  | 96811012  | 8   | 960   | NA | 4  | 4  | NA | NA | NA |
| Lymph-BNHL       | ce85ccf3-6621-4976-b187-2f28d45dd4d9 | 2  | 111875520 | 111881634 | 24  | 6114  | 1  | 7  | 16 | NA | NA | NA |
| Lymph-BNHL       | ce85ccf3-6621-4976-b187-2f28d45dd4d9 | 3  | 187461901 | 187463132 | 7   | 1231  | 1  | 1  | 2  | 2  | NA | 1  |
| Lymph-BNHL       | ce85ccf3-6621-4976-b187-2f28d45dd4d9 | 6  | 102451448 | 102456223 | 6   | 4775  | NA | 1  | 1  | 3  | NA | 1  |
| Lymph-BNHL       | ce85ccf3-6621-4976-b187-2f28d45dd4d9 | 14 | 106067210 | 106071010 | 16  | 3800  | 2  | 6  | 8  | NA | NA | NA |
| Lymph-BNHL       | ce85ccf3-6621-4976-b187-2f28d45dd4d9 | 14 | 106326837 | 106376198 | 105 | 49361 | 3  | 28 | 31 | 16 | 12 | 15 |
| Lymph-BNHL       | ce85ccf3-6621-4976-b187-2f28d45dd4d9 | 14 | 107176263 | 107180608 | 13  | 4345  | 1  | 2  | NA | 5  | 3  | 2  |
| Lymph-BNHL       | ce85ccf3-6621-4976-b187-2f28d45dd4d9 | 16 | 10971483  | 10974349  | 8   | 2866  | NA | 4  | 4  | NA | NA | NA |
| Lymph-BNHL       | ce85ccf3-6621-4976-b187-2f28d45dd4d9 | 19 | 10339621  | 10345081  | 10  | 5460  | 1  | 2  | 7  | NA | NA | NA |
| Lymph-BNHL       | ce85ccf3-6621-4976-b187-2f28d45dd4d9 | 22 | 23223275  | 23231589  | 25  | 8314  | NA | 5  | 3  | 8  | 4  | 5  |
| Panc-AdenoCA     | cf072bfe-3191-4a71-9e0b-decaa28365e1 | 4  | 117154706 | 117173282 | 50  | 18576 | 2  | 28 | 20 | NA | NA | NA |
| Panc-AdenoCA     | cf072bfe-3191-4a71-9e0b-decaa28365e1 | 5  | 135871264 | 135871465 | 7   | 201   | 1  | 3  | 3  | NA | NA | NA |
| Panc-AdenoCA     | cf072bfe-3191-4a71-9e0b-decaa28365e1 | 11 | 94970318  | 94973162  | 13  | 2844  | 3  | 4  | 6  | NA | NA | NA |
| Panc-AdenoCA     | cf072bfe-3191-4a71-9e0b-decaa28365e1 | 14 | 82711979  | 82719680  | 20  | 7701  | 2  | 10 | 7  | NA | NA | 1  |
| Liver-HCC        | cf2d34c4-c622-11e3-bf01-24c6515278c0 | 1  | 79085999  | 79086068  | 8   | 69    | NA | NA | NA | 2  | 5  | 1  |
| Liver-HCC        | cf2d34c4-c622-11e3-bf01-24c6515278c0 | 3  | 23509906  | 23509960  | 7   | 54    | NA | NA | NA | 1  | 5  | 1  |
| Liver-HCC        | cf2d34c4-c622-11e3-bf01-24c6515278c0 | 3  | 43746387  | 43746430  | 7   | 43    | NA | NA | NA | 2  | 2  | 3  |
| Liver-HCC        | cf2d34c4-c622-11e3-bf01-24c6515278c0 | 6  | 56986524  | 56986753  | 7   | 229   | NA | 6  | 1  | NA | NA | NA |
| Liver-HCC        | cf2d34c4-c622-11e3-bf01-24c6515278c0 | 7  | 67906786  | 67906822  | 6   | 36    | NA | NA | NA | NA | 6  | NA |
| Liver-HCC        | cf2d34c4-c622-11e3-bf01-24c6515278c0 | 9  | 98664881  | 98665882  | 7   | 1001  | NA | NA | 1  | 1  | 5  | NA |
| Liver-HCC        | cf2d34c4-c622-11e3-bf01-24c6515278c0 | 12 | 24690208  | 24690250  | 7   | 42    | NA | NA | NA | NA | 5  | 2  |
| Liver-HCC        | cf2d34c4-c622-11e3-bf01-24c6515278c0 | 14 | 24895090  | 24895119  | 6   | 29    | NA | NA | NA | 2  | 3  | 1  |
| Liver-HCC        | cf2d34c4-c622-11e3-bf01-24c6515278c0 | 17 | 67482567  | 67482596  | 6   | 29    | NA | NA | NA | 2  | 3  | 1  |
| Liver-HCC        | cf2d34c4-c622-11e3-bf01-24c6515278c0 | X  | 150517579 | 150518524 | 10  | 945   | 3  | 4  | 2  | NA | 1  | NA |
| Panc-AdenoCA     | cfe0bf13-2ff4-4164-9b6a-cd3615bf3ddc | 6  | 93039619  | 93043234  | 7   | 3615  | NA | NA | NA | 3  | 4  | NA |
| Liver-HCC        | d02597f8-3ac7-4165-a65f-0e134e5d215b | 3  | 100017285 | 100023413 | 9   | 6128  | 2  | 4  | 3  | NA | NA | NA |
| Liver-HCC        | d02597f8-3ac7-4165-a65f-0e134e5d215b | 3  | 102271869 | 102276935 | 17  | 5066  | 2  | 11 | 4  | NA | NA | NA |
| Liver-HCC        | d02597f8-3ac7-4165-a65f-0e134e5d215b | 11 | 67454960  | 67459338  | 12  | 4378  | 1  | 5  | 6  | NA | NA | NA |
| Panc-AdenoCA     | d05ea63c-86a3-463a-a790-2edaa74b4da7 | 3  | 81961808  | 81963559  | 9   | 1751  | NA | 5  | 4  | NA | NA | NA |
| Panc-AdenoCA     | d05ea63c-86a3-463a-a790-2edaa74b4da7 | 3  | 166453949 | 166455497 | 9   | 1548  | 3  | 5  | 1  | NA | NA | NA |
| Panc-AdenoCA     | d05ea63c-86a3-463a-a790-2edaa74b4da7 | 3  | 176356883 | 176358747 | 10  | 1864  | 2  | 3  | 5  | NA | NA | NA |
| Panc-AdenoCA     | d05ea63c-86a3-463a-a790-2edaa74b4da7 | 3  | 189819277 | 189821473 | 13  | 2196  | 3  | 5  | 5  | NA | NA | NA |
| Panc-AdenoCA     | d05ea63c-86a3-463a-a790-2edaa74b4da7 | 3  | 190678875 | 190680161 | 8   | 1286  | 4  | 2  | 2  | NA | NA | NA |
| Panc-AdenoCA     | d05ea63c-86a3-463a-a790-2edaa74b4da7 | 3  | 192338464 | 192338824 | 8   | 360   | 2  | NA | 6  | NA | NA | NA |
| Panc-AdenoCA     | d05ea63c-86a3-463a-a790-2edaa74b4da7 | 4  | 190845596 | 190846460 | 6   | 864   | NA | 4  | 2  | NA | NA | NA |
| Panc-AdenoCA     | d05ea63c-86a3-463a-a790-2edaa74b4da7 | 8  | 33789336  | 33790842  | 6   | 1506  | NA | 6  | NA | NA | NA | NA |
| Panc-AdenoCA     | d05ea63c-86a3-463a-a790-2edaa74b4da7 | 8  | 34617000  | 34618006  | 7   | 1006  | 1  | 1  | 5  | NA | NA | NA |
| Panc-AdenoCA     | d05ea63c-86a3-463a-a790-2edaa74b4da7 | 10 | 110106969 | 110108019 | 17  | 1050  | 4  | 5  | 8  | NA | NA | NA |
| Panc-AdenoCA     | d05ea63c-86a3-463a-a790-2edaa74b4da7 | 12 | 61590535  | 61590951  | 6   | 416   | 1  | 4  | 1  | NA | NA | NA |
| Panc-AdenoCA     | d05ea63c-86a3-463a-a790-2edaa74b4da7 | 17 | 14821736  | 14822375  | 6   | 639   | 1  | 4  | 1  | NA | NA | NA |
| Panc-AdenoCA     | d05ea63c-86a3-463a-a790-2edaa74b4da7 | 18 | 19258912  | 19262450  | 11  | 3538  | NA | 2  | 9  | NA | NA | NA |
| Panc-AdenoCA     | d05ea63c-86a3-463a-a790-2edaa74b4da7 | X  | 33449746  | 33451908  | 8   | 2162  | 2  | 4  | 2  | NA | NA | NA |
| ColoRect-AdenoCA | d0a0e845-32e2-4590-b909-29bd27b92900 | 20 | 36465161  | 36468009  | 14  | 2848  | NA | 7  | 7  | NA | NA | NA |
| CNS-GBM          | d1132127-1250-43af-9c16-425798a3d1a7 | 4  | 40890219  | 40891191  | 8   | 972   | 2  | NA | 1  | 1  | 2  | 2  |
| CNS-GBM          | d1132127-1250-43af-9c16-425798a3d1a7 | 12 | 86523042  | 86524353  | 9   | 1311  | 1  | 8  | NA | NA | NA | NA |
| Panc-AdenoCA     | d1804679-e728-4597-ac69-49554c087b9e | 1  | 195669114 | 195672232 | 7   | 3118  | 1  | 3  | 3  | NA | NA | NA |
| Panc-AdenoCA     | d1804679-e728-4597-ac69-49554c087b9e | 4  | 133903007 | 133903993 | 6   | 986   | 1  | 3  | 2  | NA | NA | NA |
| Panc-AdenoCA     | d1804679-e728-4597-ac69-49554c087b9e | 6  | 78536785  | 78538093  | 10  | 1308  | 1  | 3  | 6  | NA | NA | NA |
| Panc-AdenoCA     | d1804679-e728-4597-ac69-49554c087b9e | 7  | 94299378  | 94299891  | 6   | 513   | NA | 6  | NA | NA | NA | NA |
| Panc-AdenoCA     | d1804679-e728-4597-ac69-49554c087b9e | 10 | 110509385 | 110511738 | 19  | 2353  | NA | 11 | 8  | NA | NA | NA |
| Panc-AdenoCA     | d1804679-e728-4597-ac69-49554c087b9e | 14 | 79960772  | 79961640  | 9   | 868   | 2  | 2  | 5  | NA | NA | NA |
| Panc-AdenoCA     | d1804679-e728-4597-ac69-49554c087b9e | X  | 104331923 | 104332981 | 8   | 1058  | NA | 5  | 3  | NA | NA | NA |
| Liver-HCC        | d182b67c-c622-11e3-bf01-24c6515278c0 | 8  | 49546428  | 49553204  | 17  | 6776  | 3  | 8  | 6  | NA | NA | NA |
| Liver-HCC        | d252f328-4583-4e97-9a71-bb2885f06f73 | 8  | 69091877  | 69097750  | 9   | 5873  | 3  | 2  | 4  | NA | NA | NA |
| Head-SCC         | d25a4c65-9cb4-4611-909e-e68f93408d84 | 11 | 101423173 | 101437286 | 17  | 14113 | 2  | 4  | 10 | NA | NA | 1  |
| Head-SCC         | d25a4c65-9cb4-4611-909e-e68f93408d84 | 11 | 102059650 | 102061823 | 8   | 2173  | NA | 4  | 4  | NA | NA | NA |
| Ovary-AdenoCA    | d2e4dc23-992d-4e44-add4-2972718083cb | 7  | 70148570  | 70152944  | 7   | 4374  | NA | 4  | 3  | NA | NA | NA |
| Ovary-AdenoCA    | d2e4dc23-992d-4e44-add4-2972718083cb | 13 | 26268405  | 26268694  | 8   | 289   | 3  | 1  | 4  | NA | NA | NA |



|                  |                                      |    |           |           |     |       |    |    |    |    |    |    |
|------------------|--------------------------------------|----|-----------|-----------|-----|-------|----|----|----|----|----|----|
| Ovary-AdenoCA    | d2e4dc23-992d-4e44-add4-2972718083cb | 17 | 38529051  | 38531790  | 6   | 2739  | 1  | NA | NA | NA | 1  | 4  |
| Ovary-AdenoCA    | d2e4dc23-992d-4e44-add4-2972718083cb | 18 | 26100206  | 26105030  | 7   | 4824  | NA | 5  | 2  | NA | NA | NA |
| Lymph-BNHL       | d31cce9d-1b38-44fd-9378-0d128e12a011 | 2  | 84637471  | 84637928  | 6   | 457   | NA | NA | NA | 5  | 1  | NA |
| Lymph-BNHL       | d31cce9d-1b38-44fd-9378-0d128e12a011 | 2  | 158780056 | 158785316 | 8   | 5260  | NA | NA | 1  | 6  | 1  | NA |
| Lymph-BNHL       | d31cce9d-1b38-44fd-9378-0d128e12a011 | 3  | 187460835 | 187463059 | 14  | 2224  | 2  | 1  | 6  | 3  | NA | 2  |
| Lymph-BNHL       | d31cce9d-1b38-44fd-9378-0d128e12a011 | 4  | 30860154  | 30866907  | 8   | 6753  | NA | NA | 1  | 5  | NA | 2  |
| Lymph-BNHL       | d31cce9d-1b38-44fd-9378-0d128e12a011 | 13 | 107266735 | 107268548 | 7   | 1813  | NA | NA | 1  | 5  | NA | 1  |
| Lymph-BNHL       | d31cce9d-1b38-44fd-9378-0d128e12a011 | 14 | 106238754 | 106241366 | 19  | 2612  | 4  | 4  | 9  | 2  | NA | NA |
| Lymph-BNHL       | d31cce9d-1b38-44fd-9378-0d128e12a011 | 14 | 106322040 | 106350602 | 148 | 28562 | 8  | 21 | 37 | 34 | 15 | 33 |
| Lymph-BNHL       | d31cce9d-1b38-44fd-9378-0d128e12a011 | 14 | 106829741 | 106830860 | 22  | 1119  | 1  | 3  | 5  | 4  | 4  | 5  |
| Lymph-BNHL       | d31cce9d-1b38-44fd-9378-0d128e12a011 | 22 | 22735488  | 22736088  | 7   | 600   | NA | 2  | 1  | 2  | 2  | NA |
| Panc-AdenoCA     | d333b55b-8bac-4a99-9d23-3cc0c25057bf | 1  | 113520343 | 113520935 | 6   | 592   | NA | NA | 6  | NA | NA | NA |
| Panc-AdenoCA     | d333b55b-8bac-4a99-9d23-3cc0c25057bf | 2  | 96963807  | 96965979  | 24  | 2172  | 5  | 8  | 11 | NA | NA | NA |
| Panc-AdenoCA     | d333b55b-8bac-4a99-9d23-3cc0c25057bf | 8  | 117758611 | 117759176 | 7   | 565   | NA | 4  | 1  | NA | 1  | 1  |
| Head-SCC         | d3709eea-ca2a-49ac-b79c-871a5473d450 | 1  | 14797048  | 14798307  | 7   | 1259  | NA | 4  | 3  | NA | NA | NA |
| Head-SCC         | d3709eea-ca2a-49ac-b79c-871a5473d450 | 2  | 37441393  | 37444092  | 7   | 2699  | NA | 5  | 2  | NA | NA | NA |
| Head-SCC         | d3709eea-ca2a-49ac-b79c-871a5473d450 | 3  | 12666692  | 12671202  | 6   | 4510  | NA | 3  | 3  | NA | NA | NA |
| Head-SCC         | d3709eea-ca2a-49ac-b79c-871a5473d450 | 4  | 160240539 | 160244139 | 6   | 3600  | 2  | NA | 4  | NA | NA | NA |
| Head-SCC         | d3709eea-ca2a-49ac-b79c-871a5473d450 | 6  | 117383310 | 117384807 | 6   | 1497  | NA | 2  | 3  | NA | 1  | NA |
| Head-SCC         | d3709eea-ca2a-49ac-b79c-871a5473d450 | 7  | 92123604  | 92125429  | 6   | 1825  | NA | 6  | NA | NA | NA | NA |
| Head-SCC         | d3709eea-ca2a-49ac-b79c-871a5473d450 | 8  | 66894015  | 66897581  | 6   | 3566  | NA | 5  | 1  | NA | NA | NA |
| Head-SCC         | d3709eea-ca2a-49ac-b79c-871a5473d450 | 9  | 114819831 | 114821524 | 6   | 1693  | NA | 4  | 2  | NA | NA | NA |
| Head-SCC         | d3709eea-ca2a-49ac-b79c-871a5473d450 | 10 | 52634526  | 52638325  | 8   | 3799  | NA | 3  | 5  | NA | NA | NA |
| Head-SCC         | d3709eea-ca2a-49ac-b79c-871a5473d450 | 11 | 68715145  | 68716970  | 6   | 1825  | NA | 4  | 2  | NA | NA | NA |
| Head-SCC         | d3709eea-ca2a-49ac-b79c-871a5473d450 | 12 | 50507730  | 50512026  | 7   | 4296  | NA | 3  | 4  | NA | NA | NA |
| Head-SCC         | d3709eea-ca2a-49ac-b79c-871a5473d450 | 14 | 50597372  | 50598935  | 6   | 1563  | NA | 2  | 3  | 1  | NA | NA |
| Head-SCC         | d3709eea-ca2a-49ac-b79c-871a5473d450 | 17 | 6721271   | 6730357   | 14  | 9086  | NA | 11 | 3  | NA | NA | NA |
| Head-SCC         | d3709eea-ca2a-49ac-b79c-871a5473d450 | 17 | 7192917   | 7194167   | 7   | 1250  | NA | 3  | 4  | NA | NA | NA |
| Head-SCC         | d3709eea-ca2a-49ac-b79c-871a5473d450 | 19 | 10104041  | 10106133  | 6   | 2092  | NA | 5  | 1  | NA | NA | NA |
| Head-SCC         | d3709eea-ca2a-49ac-b79c-871a5473d450 | 21 | 17027722  | 17030720  | 6   | 2998  | 1  | 3  | 2  | NA | NA | NA |
| Ovary-AdenoCA    | d392ded3-afc8-4c79-b278-40245f18f2f8 | 19 | 14980305  | 14987167  | 9   | 6862  | NA | 2  | 7  | NA | NA | NA |
| Ovary-AdenoCA    | d392ded3-afc8-4c79-b278-40245f18f2f8 | 19 | 15012113  | 15013105  | 13  | 992   | 1  | 2  | 10 | NA | NA | NA |
| Ovary-AdenoCA    | d392ded3-afc8-4c79-b278-40245f18f2f8 | 19 | 23938498  | 23944207  | 21  | 5709  | 2  | 7  | 12 | NA | NA | NA |
| Ovary-AdenoCA    | d392ded3-afc8-4c79-b278-40245f18f2f8 | 19 | 34640266  | 34643945  | 9   | 3679  | NA | 1  | 8  | NA | NA | NA |
| Ovary-AdenoCA    | d392ded3-afc8-4c79-b278-40245f18f2f8 | 19 | 43871843  | 43873028  | 7   | 1185  | 1  | 1  | 5  | NA | NA | NA |
| Ovary-AdenoCA    | d392ded3-afc8-4c79-b278-40245f18f2f8 | 19 | 43910761  | 43915247  | 15  | 4486  | NA | 4  | 11 | NA | NA | NA |
| Ovary-AdenoCA    | d392ded3-afc8-4c79-b278-40245f18f2f8 | 19 | 43985069  | 43989054  | 7   | 3985  | 1  | NA | 6  | NA | NA | NA |
| Ovary-AdenoCA    | d392ded3-afc8-4c79-b278-40245f18f2f8 | 21 | 23643798  | 23646051  | 7   | 2253  | 2  | NA | 5  | NA | NA | NA |
| Ovary-AdenoCA    | d392ded3-afc8-4c79-b278-40245f18f2f8 | 21 | 33003089  | 33013682  | 23  | 10593 | 4  | 9  | 10 | NA | NA | NA |
| Ovary-AdenoCA    | d392ded3-afc8-4c79-b278-40245f18f2f8 | 21 | 43885751  | 43889057  | 8   | 3306  | 3  | 1  | 3  | NA | NA | 1  |
| Ovary-AdenoCA    | d392ded3-afc8-4c79-b278-40245f18f2f8 | 21 | 44346540  | 44348898  | 12  | 2358  | 2  | 4  | 5  | NA | NA | 1  |
| Liver-HCC        | d3ad5b5a-c622-11e3-bf01-24c6515278c0 | X  | 68920373  | 68920800  | 6   | 427   | NA | 4  | 2  | NA | NA | NA |
| ColoRect-AdenoCA | d3aff5d3-23c0-43ae-9c01-8ddd776b530b | 20 | 10612336  | 10616709  | 6   | 4373  | NA | 3  | 3  | NA | NA | NA |
| ColoRect-AdenoCA | d3aff5d3-23c0-43ae-9c01-8ddd776b530b | 20 | 10618957  | 10625083  | 9   | 6126  | 3  | 5  | NA | 1  | NA | NA |
| ColoRect-AdenoCA | d3aff5d3-23c0-43ae-9c01-8ddd776b530b | 20 | 19329498  | 19331890  | 8   | 2392  | 1  | 5  | 2  | NA | NA | NA |
| ColoRect-AdenoCA | d3aff5d3-23c0-43ae-9c01-8ddd776b530b | 20 | 37462741  | 37467813  | 20  | 5072  | 4  | 12 | 3  | NA | NA | 1  |
| ColoRect-AdenoCA | d3aff5d3-23c0-43ae-9c01-8ddd776b530b | 20 | 48324683  | 48326232  | 8   | 1549  | 4  | 1  | 3  | NA | NA | NA |
| ColoRect-AdenoCA | d3aff5d3-23c0-43ae-9c01-8ddd776b530b | 20 | 51538689  | 51544680  | 9   | 5991  | 3  | 3  | 3  | NA | NA | NA |
| ColoRect-AdenoCA | d3d65db3-36f9-41c7-8e5e-1683ce94dfcb | 11 | 10179443  | 10184966  | 21  | 5523  | 2  | 12 | 5  | 1  | NA | 1  |
| ColoRect-AdenoCA | d3d65db3-36f9-41c7-8e5e-1683ce94dfcb | 11 | 13925635  | 13929780  | 27  | 4145  | 5  | 18 | 3  | NA | 1  | NA |
| ColoRect-AdenoCA | d3d65db3-36f9-41c7-8e5e-1683ce94dfcb | 11 | 36633776  | 36634260  | 8   | 484   | NA | 4  | 4  | NA | NA | NA |
| ColoRect-AdenoCA | d3d65db3-36f9-41c7-8e5e-1683ce94dfcb | 11 | 80024036  | 80031938  | 24  | 7902  | 4  | 5  | 15 | NA | NA | NA |
| ColoRect-AdenoCA | d3d65db3-36f9-41c7-8e5e-1683ce94dfcb | 17 | 7115002   | 7116011   | 9   | 1009  | 3  | 4  | 2  | NA | NA | NA |
| ColoRect-AdenoCA | d3d65db3-36f9-41c7-8e5e-1683ce94dfcb | 17 | 7141122   | 7142473   | 17  | 1351  | 3  | 10 | 4  | NA | NA | NA |
| ColoRect-AdenoCA | d3d65db3-36f9-41c7-8e5e-1683ce94dfcb | 17 | 27040695  | 27042600  | 7   | 1905  | 3  | 4  | NA | NA | NA | NA |
| ColoRect-AdenoCA | d3d65db3-36f9-41c7-8e5e-1683ce94dfcb | 21 | 18327755  | 18330640  | 25  | 2885  | 7  | 8  | 9  | NA | NA | 1  |
| ColoRect-AdenoCA | d3d65db3-36f9-41c7-8e5e-1683ce94dfcb | 21 | 35119914  | 35121021  | 8   | 1107  | 1  | 5  | 2  | NA | NA | NA |
| Kidney-RCC       | d429c27a-5963-42fe-b3a0-7252c20669d8 | 20 | 22155499  | 22163341  | 12  | 7842  | NA | 1  | NA | 5  | NA | 6  |
| Skin-Melanoma    | d432e99a-67fb-4609-b90f-99438eee7cae | 1  | 118593338 | 118595444 | 9   | 2106  | NA | 4  | 5  | NA | NA | NA |
| Skin-Melanoma    | d432e99a-67fb-4609-b90f-99438eee7cae | 17 | 52954966  | 52956940  | 7   | 1974  | NA | NA | 7  | NA | NA | NA |

|                  |                                       |    |           |           |    |       |    |    |    |    |    |    |
|------------------|---------------------------------------|----|-----------|-----------|----|-------|----|----|----|----|----|----|
| Skin-Melanoma    | d432e99a-67fb-4609-b90f-99438eee7cae  | 17 | 57012516  | 57012727  | 8  | 211   | 1  | 4  | 3  | NA | NA | NA |
| Skin-Melanoma    | d432e99a-67fb-4609-b90f-99438eee7cae  | 17 | 67905321  | 67907413  | 8  | 2092  | 1  | 2  | 5  | NA | NA | NA |
| ColoRect-AdenoCA | d452293a-6148-4fcf-9fbc-446815016751  | 8  | 93905941  | 93906853  | 8  | 912   | NA | 4  | 4  | NA | NA | NA |
| ColoRect-AdenoCA | d452293a-6148-4fcf-9fbc-446815016751  | 14 | 26097462  | 26099196  | 8  | 1734  | 4  | 3  | 1  | NA | NA | NA |
| Bladder-TCC      | d4615ca0-b5c7-4a5c-8593-bd50034a78ae  | 7  | 112419407 | 112422085 | 6  | 2678  | 1  | 4  | 1  | NA | NA | NA |
| Bladder-TCC      | d4615ca0-b5c7-4a5c-8593-bd50034a78ae  | 8  | 109026248 | 109026265 | 6  | 17    | 1  | NA | 1  | 3  | 1  | NA |
| Panc-AdenoCA     | d4907a1b-8b06-47c5-8bca-c781d9cdda4f8 | 1  | 118725049 | 118725938 | 14 | 889   | 1  | 4  | 8  | NA | NA | 1  |
| Panc-AdenoCA     | d4907a1b-8b06-47c5-8bca-c781d9cdda4f8 | 8  | 13849267  | 13849713  | 6  | 446   | 1  | 3  | 2  | NA | NA | NA |
| Panc-AdenoCA     | d4907a1b-8b06-47c5-8bca-c781d9cdda4f8 | 8  | 37565972  | 37570669  | 12 | 4697  | 4  | 4  | 4  | NA | NA | NA |
| Panc-AdenoCA     | d4907a1b-8b06-47c5-8bca-c781d9cdda4f8 | 12 | 133214553 | 133219196 | 6  | 4643  | 2  | 1  | 3  | NA | NA | NA |
| Panc-AdenoCA     | d4907a1b-8b06-47c5-8bca-c781d9cdda4f8 | 22 | 17782041  | 17786616  | 18 | 4575  | 7  | 3  | 8  | NA | NA | NA |
| Head-SCC         | d4b80307-abbd-48bb-b52c-6dcd409699a2  | 2  | 45467400  | 45467986  | 10 | 586   | 2  | 1  | 7  | NA | NA | NA |
| Ovary-AdenoCA    | d4bf6034-aeae-48a6-907b-10e2cc904015  | 6  | 50752609  | 50754334  | 7  | 1725  | 2  | 2  | 3  | NA | NA | NA |
| Ovary-AdenoCA    | d4bf6034-aeae-48a6-907b-10e2cc904015  | 10 | 50793398  | 50793902  | 6  | 504   | 2  | 2  | 2  | NA | NA | NA |
| Ovary-AdenoCA    | d4bf6034-aeae-48a6-907b-10e2cc904015  | 10 | 66562518  | 66567567  | 7  | 5049  | 1  | 5  | 1  | NA | NA | NA |
| Ovary-AdenoCA    | d4bf6034-aeae-48a6-907b-10e2cc904015  | 20 | 17655859  | 17656979  | 7  | 1120  | NA | 2  | 5  | NA | NA | NA |
| Kidney-RCC       | d4c6061b-5019-4564-806d-4e75910a4690  | 3  | 84510947  | 84511465  | 7  | 518   | 1  | 5  | 1  | NA | NA | NA |
| Eso-AdenoCa      | d4cf11be-3bd7-403b-9722-91d8e8761e4d  | 6  | 32704754  | 32706496  | 11 | 1742  | 3  | 2  | 6  | NA | NA | NA |
| Eso-AdenoCa      | d4cf11be-3bd7-403b-9722-91d8e8761e4d  | 10 | 109514768 | 109519718 | 6  | 4950  | 1  | NA | NA | 2  | 1  | 2  |
| Eso-AdenoCa      | d4cf11be-3bd7-403b-9722-91d8e8761e4d  | 17 | 50395442  | 50395703  | 6  | 261   | 2  | 1  | 3  | NA | NA | NA |
| Eso-AdenoCa      | d4cf11be-3bd7-403b-9722-91d8e8761e4d  | 17 | 51157620  | 51159718  | 8  | 2098  | 1  | 3  | 4  | NA | NA | NA |
| Eso-AdenoCa      | d4cf11be-3bd7-403b-9722-91d8e8761e4d  | 18 | 15209808  | 15211226  | 6  | 1418  | NA | 1  | 5  | NA | NA | NA |
| Eso-AdenoCa      | d4cf11be-3bd7-403b-9722-91d8e8761e4d  | X  | 55417228  | 55419340  | 6  | 2112  | NA | 3  | 3  | NA | NA | NA |
| Breast-AdenoCa   | d5372745-95cf-4572-a6e7-e7f5b796911a  | 1  | 94528272  | 94548410  | 23 | 20138 | 6  | 13 | 3  | NA | 1  | NA |
| Breast-AdenoCa   | d5372745-95cf-4572-a6e7-e7f5b796911a  | 1  | 119707129 | 119713262 | 16 | 6133  | NA | 7  | 9  | NA | NA | NA |
| Breast-AdenoCa   | d5372745-95cf-4572-a6e7-e7f5b796911a  | 2  | 80717656  | 80718810  | 6  | 1154  | 1  | 3  | NA | NA | 1  | 1  |
| Breast-AdenoCa   | d5372745-95cf-4572-a6e7-e7f5b796911a  | 3  | 133079005 | 133081351 | 10 | 2346  | 4  | 4  | 2  | NA | NA | NA |
| Breast-AdenoCa   | d5372745-95cf-4572-a6e7-e7f5b796911a  | 3  | 154164000 | 154169311 | 13 | 5311  | 1  | 6  | 6  | NA | NA | NA |
| Breast-AdenoCa   | d5372745-95cf-4572-a6e7-e7f5b796911a  | 4  | 41265150  | 41267977  | 6  | 2827  | 1  | 4  | 1  | NA | NA | NA |
| Breast-AdenoCa   | d5372745-95cf-4572-a6e7-e7f5b796911a  | 4  | 41416483  | 41417556  | 7  | 1073  | 6  | 1  | NA | NA | NA | NA |
| Breast-AdenoCa   | d5372745-95cf-4572-a6e7-e7f5b796911a  | 8  | 40695656  | 40696161  | 10 | 505   | 1  | NA | 9  | NA | NA | NA |
| Breast-AdenoCa   | d5372745-95cf-4572-a6e7-e7f5b796911a  | 8  | 61741025  | 61741753  | 12 | 728   | 2  | 3  | 7  | NA | NA | NA |
| Breast-AdenoCa   | d5372745-95cf-4572-a6e7-e7f5b796911a  | 10 | 67748657  | 67751138  | 6  | 2481  | 1  | 5  | NA | NA | NA | NA |
| Breast-AdenoCa   | d5372745-95cf-4572-a6e7-e7f5b796911a  | 11 | 67088354  | 67090711  | 7  | 2357  | 1  | 5  | 1  | NA | NA | NA |
| Breast-AdenoCa   | d5372745-95cf-4572-a6e7-e7f5b796911a  | 19 | 2366255   | 2366882   | 12 | 627   | 1  | 6  | 5  | NA | NA | NA |
| Breast-AdenoCa   | d5372745-95cf-4572-a6e7-e7f5b796911a  | 19 | 5654893   | 5659213   | 11 | 4320  | NA | 4  | 7  | NA | NA | NA |
| Breast-AdenoCa   | d5372745-95cf-4572-a6e7-e7f5b796911a  | 21 | 47522717  | 47527957  | 10 | 5240  | 1  | 9  | NA | NA | NA | NA |
| Bone-Leiomyo     | d53c2680-89ac-4f87-a7ba-f4c669546b76  | 6  | 168741255 | 168741885 | 6  | 630   | NA | 3  | 3  | NA | NA | NA |
| Bone-Leiomyo     | d53c2680-89ac-4f87-a7ba-f4c669546b76  | 10 | 379157    | 379806    | 8  | 649   | NA | 2  | 6  | NA | NA | NA |
| Bone-Leiomyo     | d53c2680-89ac-4f87-a7ba-f4c669546b76  | 10 | 395996    | 396383    | 7  | 387   | NA | 3  | 4  | NA | NA | NA |
| Bone-Leiomyo     | d53c2680-89ac-4f87-a7ba-f4c669546b76  | 10 | 25527113  | 25529185  | 8  | 2072  | 2  | 2  | 3  | NA | 1  | NA |
| Bone-Leiomyo     | d53c2680-89ac-4f87-a7ba-f4c669546b76  | 10 | 25669829  | 25671190  | 23 | 1361  | 1  | 7  | 15 | NA | NA | NA |
| Bone-Leiomyo     | d53c2680-89ac-4f87-a7ba-f4c669546b76  | 10 | 25843811  | 25845977  | 13 | 2166  | 1  | 8  | 4  | NA | NA | NA |
| Bone-Leiomyo     | d53c2680-89ac-4f87-a7ba-f4c669546b76  | 10 | 28918430  | 28919606  | 8  | 1176  | 2  | 4  | 2  | NA | NA | NA |
| Bone-Leiomyo     | d53c2680-89ac-4f87-a7ba-f4c669546b76  | 10 | 29539745  | 29542230  | 7  | 2485  | NA | 5  | 2  | NA | NA | NA |
| Bone-Leiomyo     | d53c2680-89ac-4f87-a7ba-f4c669546b76  | 10 | 37866001  | 37867150  | 7  | 1149  | 1  | 5  | 1  | NA | NA | NA |
| Lung-SCC         | d54ca81c-1bcc-41ea-b17a-9f7249ebe9c1  | 1  | 40995878  | 40998103  | 20 | 2225  | NA | 5  | 15 | NA | NA | NA |
| Lung-SCC         | d54ca81c-1bcc-41ea-b17a-9f7249ebe9c1  | 1  | 63433773  | 63434509  | 7  | 736   | 1  | NA | 6  | NA | NA | NA |
| Lung-SCC         | d54ca81c-1bcc-41ea-b17a-9f7249ebe9c1  | 2  | 153388930 | 153389238 | 8  | 308   | 1  | 1  | 6  | NA | NA | NA |
| Lung-SCC         | d54ca81c-1bcc-41ea-b17a-9f7249ebe9c1  | 3  | 175599692 | 175602282 | 20 | 2590  | 1  | 8  | 11 | NA | NA | NA |
| Lung-SCC         | d54ca81c-1bcc-41ea-b17a-9f7249ebe9c1  | 3  | 190181568 | 190182054 | 10 | 486   | 1  | 2  | 7  | NA | NA | NA |
| Lung-SCC         | d54ca81c-1bcc-41ea-b17a-9f7249ebe9c1  | 4  | 107852703 | 107854143 | 7  | 1440  | NA | 4  | 3  | NA | NA | NA |
| Lung-SCC         | d54ca81c-1bcc-41ea-b17a-9f7249ebe9c1  | 9  | 4909994   | 4911282   | 6  | 1288  | 2  | 2  | 2  | NA | NA | NA |
| Lung-SCC         | d54ca81c-1bcc-41ea-b17a-9f7249ebe9c1  | X  | 73630015  | 73631238  | 8  | 1223  | NA | 4  | 4  | NA | NA | NA |
| CNS-GBM          | d60f54f5-b154-42c4-99fb-cea4e7a33dc7  | 1  | 209997351 | 210001493 | 10 | 4142  | 3  | 5  | 2  | NA | NA | NA |
| CNS-GBM          | d60f54f5-b154-42c4-99fb-cea4e7a33dc7  | 1  | 213044107 | 213044501 | 8  | 394   | NA | NA | 8  | NA | NA | NA |
| CNS-GBM          | d60f54f5-b154-42c4-99fb-cea4e7a33dc7  | 1  | 216903533 | 216908443 | 7  | 4910  | NA | 3  | 1  | 2  | 1  | NA |
| CNS-GBM          | d60f54f5-b154-42c4-99fb-cea4e7a33dc7  | 1  | 235668692 | 235688653 | 26 | 19961 | 4  | 10 | 12 | NA | NA | NA |
| CNS-GBM          | d60f54f5-b154-42c4-99fb-cea4e7a33dc7  | 1  | 235836765 | 235839625 | 10 | 2860  | 1  | 6  | 2  | NA | 1  | NA |
| CNS-GBM          | d60f54f5-b154-42c4-99fb-cea4e7a33dc7  | 1  | 240083436 | 240086385 | 8  | 2949  | 1  | 4  | 3  | NA | NA | NA |

|                 |                                      |    |           |           |     |       |    |    |    |    |    |    |
|-----------------|--------------------------------------|----|-----------|-----------|-----|-------|----|----|----|----|----|----|
| CNS-GBM         | d60f54f5-b154-42c4-99fb-cea4e7a33dc7 | 6  | 75382415  | 75386809  | 6   | 4394  | 2  | 2  | 2  | NA | NA | NA |
| CNS-GBM         | d60f54f5-b154-42c4-99fb-cea4e7a33dc7 | 9  | 16046158  | 16046370  | 8   | 212   | NA | NA | 8  | NA | NA | NA |
| Liver-HCC       | d60f880a-c622-11e3-bf01-24c6515278c0 | 14 | 34812966  | 34813723  | 7   | 757   | NA | NA | 7  | NA | NA | NA |
| Stomach-AdenoCA | d6738c83-7b52-4224-846a-67bd085aaab8 | 3  | 924837    | 930054    | 7   | 5217  | 2  | 3  | 2  | NA | NA | NA |
| Ovary-AdenoCA   | d67cad13-e849-48b0-926c-10b6046ba0b9 | 1  | 6646809   | 6652980   | 18  | 6171  | 4  | 6  | 8  | NA | NA | NA |
| Ovary-AdenoCA   | d67cad13-e849-48b0-926c-10b6046ba0b9 | 1  | 12345109  | 12348095  | 16  | 2986  | 3  | 6  | 7  | NA | NA | NA |
| Ovary-AdenoCA   | d67cad13-e849-48b0-926c-10b6046ba0b9 | 2  | 63548384  | 63549332  | 10  | 948   | 2  | 4  | 3  | NA | NA | 1  |
| Ovary-AdenoCA   | d67cad13-e849-48b0-926c-10b6046ba0b9 | 2  | 177542418 | 177545464 | 10  | 3046  | 3  | 2  | 5  | NA | NA | NA |
| Ovary-AdenoCA   | d67cad13-e849-48b0-926c-10b6046ba0b9 | 2  | 238310573 | 238312770 | 10  | 2197  | 2  | 5  | 3  | NA | NA | NA |
| Ovary-AdenoCA   | d67cad13-e849-48b0-926c-10b6046ba0b9 | 5  | 39556420  | 39556969  | 12  | 549   | 3  | 2  | 7  | NA | NA | NA |
| Ovary-AdenoCA   | d67cad13-e849-48b0-926c-10b6046ba0b9 | 6  | 7028222   | 7028733   | 6   | 511   | 1  | 2  | 3  | NA | NA | NA |
| Ovary-AdenoCA   | d67cad13-e849-48b0-926c-10b6046ba0b9 | 12 | 24544160  | 24547490  | 6   | 3330  | 1  | 5  | NA | NA | NA | NA |
| Lymph-BNHL      | d6ee68e5-ceb3-4a63-b3bd-e64fe5398102 | 2  | 89157407  | 89165550  | 49  | 8143  | 2  | 4  | 6  | 16 | 10 | 11 |
| Lymph-BNHL      | d6ee68e5-ceb3-4a63-b3bd-e64fe5398102 | 2  | 89326738  | 89327032  | 8   | 294   | NA | 2  | 4  | 1  | 1  | NA |
| Lymph-BNHL      | d6ee68e5-ceb3-4a63-b3bd-e64fe5398102 | 14 | 106210933 | 106213373 | 13  | 2440  | 1  | 2  | 7  | NA | 2  | 1  |
| Lymph-BNHL      | d6ee68e5-ceb3-4a63-b3bd-e64fe5398102 | 14 | 106324398 | 106329187 | 52  | 4789  | 1  | 9  | 18 | 13 | 4  | 7  |
| Lymph-BNHL      | d6ee68e5-ceb3-4a63-b3bd-e64fe5398102 | 18 | 60985015  | 60988291  | 9   | 3276  | NA | 1  | 4  | 3  | NA | 1  |
| Lymph-BNHL      | d6ee68e5-ceb3-4a63-b3bd-e64fe5398102 | 22 | 23227613  | 23231640  | 12  | 4027  | NA | 2  | 6  | 3  | NA | 1  |
| Eso-AdenoCa     | d707940e-0f9d-4da3-9380-90a422e44efd | 3  | 90410527  | 90411018  | 7   | 491   | NA | 3  | 1  | 2  | 1  | NA |
| Lymph-BNHL      | d733cf1a-4c42-4def-b6cb-5ef2c6a27fcd | 1  | 70016088  | 70021303  | 7   | 5215  | NA | NA | 2  | 2  | 1  | 2  |
| Lymph-BNHL      | d733cf1a-4c42-4def-b6cb-5ef2c6a27fcd | 1  | 195265034 | 195276856 | 14  | 11822 | NA | 1  | 2  | 4  | 2  | 5  |
| Lymph-BNHL      | d733cf1a-4c42-4def-b6cb-5ef2c6a27fcd | 1  | 203274837 | 203275766 | 19  | 929   | 1  | 2  | 9  | 3  | 3  | 1  |
| Lymph-BNHL      | d733cf1a-4c42-4def-b6cb-5ef2c6a27fcd | 2  | 136874316 | 136875714 | 8   | 1398  | NA | 1  | 7  | NA | NA | NA |
| Lymph-BNHL      | d733cf1a-4c42-4def-b6cb-5ef2c6a27fcd | 2  | 139651834 | 139657022 | 8   | 5188  | NA | NA | 2  | 4  | 2  | NA |
| Lymph-BNHL      | d733cf1a-4c42-4def-b6cb-5ef2c6a27fcd | 3  | 60777962  | 60782541  | 6   | 4579  | 1  | NA | 1  | 3  | NA | 1  |
| Lymph-BNHL      | d733cf1a-4c42-4def-b6cb-5ef2c6a27fcd | 3  | 60784259  | 60790946  | 8   | 6687  | 1  | NA | 3  | 3  | NA | 1  |
| Lymph-BNHL      | d733cf1a-4c42-4def-b6cb-5ef2c6a27fcd | 3  | 68011836  | 68016803  | 7   | 4967  | 1  | NA | NA | 3  | NA | 3  |
| Lymph-BNHL      | d733cf1a-4c42-4def-b6cb-5ef2c6a27fcd | 3  | 110044714 | 110048363 | 9   | 3649  | NA | NA | 2  | 2  | 2  | 3  |
| Lymph-BNHL      | d733cf1a-4c42-4def-b6cb-5ef2c6a27fcd | 3  | 144682728 | 144688346 | 9   | 5618  | 1  | NA | 1  | 4  | 1  | 2  |
| Lymph-BNHL      | d733cf1a-4c42-4def-b6cb-5ef2c6a27fcd | 3  | 186711709 | 186716196 | 8   | 4487  | NA | NA | 4  | 3  | NA | 1  |
| Lymph-BNHL      | d733cf1a-4c42-4def-b6cb-5ef2c6a27fcd | 3  | 186783994 | 186784212 | 7   | 218   | 1  | NA | NA | 1  | 2  | 3  |
| Lymph-BNHL      | d733cf1a-4c42-4def-b6cb-5ef2c6a27fcd | 3  | 187458826 | 187476237 | 56  | 17411 | 1  | 7  | 15 | 14 | 11 | 8  |
| Lymph-BNHL      | d733cf1a-4c42-4def-b6cb-5ef2c6a27fcd | 3  | 187660877 | 187665570 | 11  | 4693  | NA | 1  | 2  | 5  | 1  | 2  |
| Lymph-BNHL      | d733cf1a-4c42-4def-b6cb-5ef2c6a27fcd | 3  | 187688046 | 187693859 | 8   | 5813  | NA | 1  | 3  | 3  | 1  | NA |
| Lymph-BNHL      | d733cf1a-4c42-4def-b6cb-5ef2c6a27fcd | 3  | 188471432 | 188471873 | 7   | 441   | NA | NA | 5  | NA | 1  | 1  |
| Lymph-BNHL      | d733cf1a-4c42-4def-b6cb-5ef2c6a27fcd | 4  | 37130     | 41259     | 7   | 4129  | NA | NA | NA | 6  | 1  | NA |
| Lymph-BNHL      | d733cf1a-4c42-4def-b6cb-5ef2c6a27fcd | 4  | 25862561  | 25864134  | 9   | 1573  | NA | NA | 3  | 3  | 2  | 1  |
| Lymph-BNHL      | d733cf1a-4c42-4def-b6cb-5ef2c6a27fcd | 4  | 40194761  | 40204378  | 28  | 9617  | 2  | 1  | 19 | 3  | 2  | 1  |
| Lymph-BNHL      | d733cf1a-4c42-4def-b6cb-5ef2c6a27fcd | 4  | 64989623  | 64995303  | 12  | 5680  | NA | NA | 1  | 6  | 2  | 3  |
| Lymph-BNHL      | d733cf1a-4c42-4def-b6cb-5ef2c6a27fcd | 4  | 121657783 | 121660806 | 7   | 3023  | NA | 1  | NA | 5  | 1  | NA |
| Lymph-BNHL      | d733cf1a-4c42-4def-b6cb-5ef2c6a27fcd | 4  | 132560742 | 132561480 | 7   | 738   | NA | 1  | NA | 3  | 2  | 1  |
| Lymph-BNHL      | d733cf1a-4c42-4def-b6cb-5ef2c6a27fcd | 4  | 161473631 | 161475971 | 8   | 2340  | NA | NA | 1  | 4  | NA | 3  |
| Lymph-BNHL      | d733cf1a-4c42-4def-b6cb-5ef2c6a27fcd | 4  | 161489656 | 161490807 | 7   | 1151  | NA | NA | 4  | NA | 1  | 2  |
| Lymph-BNHL      | d733cf1a-4c42-4def-b6cb-5ef2c6a27fcd | 4  | 165087940 | 165091696 | 9   | 3756  | 1  | NA | 1  | 4  | NA | 3  |
| Lymph-BNHL      | d733cf1a-4c42-4def-b6cb-5ef2c6a27fcd | 4  | 171846586 | 171851143 | 7   | 4557  | 1  | NA | 1  | 3  | 1  | 1  |
| Lymph-BNHL      | d733cf1a-4c42-4def-b6cb-5ef2c6a27fcd | 4  | 174258592 | 174261606 | 7   | 3014  | NA | 1  | 1  | 4  | NA | 1  |
| Lymph-BNHL      | d733cf1a-4c42-4def-b6cb-5ef2c6a27fcd | 5  | 85207674  | 85209449  | 9   | 1775  | NA | 3  | NA | 2  | 1  | 3  |
| Lymph-BNHL      | d733cf1a-4c42-4def-b6cb-5ef2c6a27fcd | 5  | 88324736  | 88342032  | 20  | 17296 | NA | NA | 6  | 4  | 2  | 8  |
| Lymph-BNHL      | d733cf1a-4c42-4def-b6cb-5ef2c6a27fcd | 5  | 88360404  | 88364391  | 8   | 3987  | NA | NA | 3  | 2  | 1  | 2  |
| Lymph-BNHL      | d733cf1a-4c42-4def-b6cb-5ef2c6a27fcd | 5  | 105091980 | 105093250 | 7   | 1270  | 1  | NA | NA | 3  | NA | 3  |
| Lymph-BNHL      | d733cf1a-4c42-4def-b6cb-5ef2c6a27fcd | 5  | 109822805 | 109828814 | 9   | 6009  | NA | NA | 1  | 7  | NA | 1  |
| Lymph-BNHL      | d733cf1a-4c42-4def-b6cb-5ef2c6a27fcd | 6  | 20981509  | 20984803  | 7   | 3294  | NA | NA | 2  | 4  | NA | 1  |
| Lymph-BNHL      | d733cf1a-4c42-4def-b6cb-5ef2c6a27fcd | 6  | 37138937  | 37139756  | 9   | 819   | 1  | 1  | 5  | 2  | NA | NA |
| Lymph-BNHL      | d733cf1a-4c42-4def-b6cb-5ef2c6a27fcd | 6  | 134491940 | 134496682 | 10  | 4742  | NA | 2  | 8  | NA | NA | NA |
| Lymph-BNHL      | d733cf1a-4c42-4def-b6cb-5ef2c6a27fcd | 7  | 82915500  | 82920128  | 9   | 4628  | 1  | NA | NA | 3  | 2  | 3  |
| Lymph-BNHL      | d733cf1a-4c42-4def-b6cb-5ef2c6a27fcd | 7  | 110612962 | 110617829 | 7   | 4867  | NA | NA | 1  | 3  | NA | 3  |
| Lymph-BNHL      | d733cf1a-4c42-4def-b6cb-5ef2c6a27fcd | 7  | 110630395 | 110636675 | 8   | 6280  | NA | NA | NA | 1  | 4  | 3  |
| Lymph-BNHL      | d733cf1a-4c42-4def-b6cb-5ef2c6a27fcd | 7  | 110652899 | 110667882 | 17  | 14983 | 1  | 1  | 2  | 8  | 2  | 3  |
| Lymph-BNHL      | d733cf1a-4c42-4def-b6cb-5ef2c6a27fcd | 7  | 110670824 | 110801114 | 133 | 1E+05 | 10 | 2  | 15 | 61 | 12 | 33 |
| Lymph-BNHL      | d733cf1a-4c42-4def-b6cb-5ef2c6a27fcd | 7  | 122751701 | 122754825 | 8   | 3124  | 1  | 1  | 1  | 3  | 1  | 1  |

|                 |                                      |    |           |           |     |       |    |    |    |    |    |    |
|-----------------|--------------------------------------|----|-----------|-----------|-----|-------|----|----|----|----|----|----|
| Lymph-BNHL      | d733cf1a-4c42-4def-b6cb-5ef2c6a27fcd | 8  | 66296120  | 66299941  | 10  | 3821  | 2  | NA | NA | 4  | 3  | 1  |
| Lymph-BNHL      | d733cf1a-4c42-4def-b6cb-5ef2c6a27fcd | 9  | 37024963  | 37033505  | 18  | 8542  | NA | 5  | 12 | NA | 1  | NA |
| Lymph-BNHL      | d733cf1a-4c42-4def-b6cb-5ef2c6a27fcd | 9  | 73648712  | 73651617  | 7   | 2905  | 2  | NA | 1  | NA | NA | 4  |
| Lymph-BNHL      | d733cf1a-4c42-4def-b6cb-5ef2c6a27fcd | 10 | 19516486  | 19518667  | 7   | 2181  | NA | NA | 1  | 3  | 2  | 1  |
| Lymph-BNHL      | d733cf1a-4c42-4def-b6cb-5ef2c6a27fcd | 11 | 92742766  | 92745991  | 8   | 3225  | NA | NA | 2  | 3  | NA | 3  |
| Lymph-BNHL      | d733cf1a-4c42-4def-b6cb-5ef2c6a27fcd | 11 | 128389554 | 128392005 | 7   | 2451  | NA | NA | 7  | NA | NA | NA |
| Lymph-BNHL      | d733cf1a-4c42-4def-b6cb-5ef2c6a27fcd | 12 | 21244725  | 21248348  | 7   | 3623  | NA | NA | 1  | 1  | 3  | 2  |
| Lymph-BNHL      | d733cf1a-4c42-4def-b6cb-5ef2c6a27fcd | 12 | 71403179  | 71408122  | 9   | 4943  | NA | 1  | 1  | 3  | 2  | 2  |
| Lymph-BNHL      | d733cf1a-4c42-4def-b6cb-5ef2c6a27fcd | 12 | 73156772  | 73164099  | 9   | 7327  | 2  | NA | 4  | 2  | NA | 1  |
| Lymph-BNHL      | d733cf1a-4c42-4def-b6cb-5ef2c6a27fcd | 12 | 73179987  | 73192021  | 14  | 12034 | 2  | 4  | 1  | 3  | NA | 4  |
| Lymph-BNHL      | d733cf1a-4c42-4def-b6cb-5ef2c6a27fcd | 12 | 84553358  | 84557532  | 7   | 4174  | NA | 1  | 1  | 2  | 1  | 2  |
| Lymph-BNHL      | d733cf1a-4c42-4def-b6cb-5ef2c6a27fcd | 12 | 113494167 | 113497201 | 29  | 3034  | NA | 3  | 15 | 6  | 4  | 1  |
| Lymph-BNHL      | d733cf1a-4c42-4def-b6cb-5ef2c6a27fcd | 12 | 122457468 | 122464647 | 21  | 7179  | 1  | 5  | 9  | 2  | 4  | NA |
| Lymph-BNHL      | d733cf1a-4c42-4def-b6cb-5ef2c6a27fcd | 13 | 46958261  | 46963142  | 12  | 4881  | NA | NA | 8  | 2  | 2  | NA |
| Lymph-BNHL      | d733cf1a-4c42-4def-b6cb-5ef2c6a27fcd | 13 | 56404507  | 56409619  | 8   | 5112  | NA | 1  | 1  | 2  | 1  | 3  |
| Lymph-BNHL      | d733cf1a-4c42-4def-b6cb-5ef2c6a27fcd | 13 | 87862111  | 87884681  | 36  | 22570 | NA | 1  | 9  | 10 | 8  | 8  |
| Lymph-BNHL      | d733cf1a-4c42-4def-b6cb-5ef2c6a27fcd | 14 | 62164125  | 62165493  | 6   | 1368  | 1  | NA | 5  | NA | NA | NA |
| Lymph-BNHL      | d733cf1a-4c42-4def-b6cb-5ef2c6a27fcd | 14 | 106110083 | 106112755 | 13  | 2672  | NA | 5  | 7  | NA | NA | 1  |
| Lymph-BNHL      | d733cf1a-4c42-4def-b6cb-5ef2c6a27fcd | 14 | 106207570 | 106241387 | 71  | 33817 | 4  | 12 | 44 | 7  | 1  | 3  |
| Lymph-BNHL      | d733cf1a-4c42-4def-b6cb-5ef2c6a27fcd | 14 | 106322630 | 106330797 | 121 | 8167  | 8  | 15 | 43 | 28 | 12 | 15 |
| Lymph-BNHL      | d733cf1a-4c42-4def-b6cb-5ef2c6a27fcd | 14 | 106518847 | 106524394 | 45  | 5547  | NA | 2  | 8  | 14 | 7  | 14 |
| Lymph-BNHL      | d733cf1a-4c42-4def-b6cb-5ef2c6a27fcd | 16 | 10971688  | 10973829  | 7   | 2141  | NA | 1  | 6  | NA | NA | NA |
| Lymph-BNHL      | d733cf1a-4c42-4def-b6cb-5ef2c6a27fcd | 17 | 56409012  | 56409674  | 7   | 662   | NA | NA | 7  | NA | NA | NA |
| Lymph-BNHL      | d733cf1a-4c42-4def-b6cb-5ef2c6a27fcd | 18 | 26608967  | 26616157  | 14  | 7190  | NA | NA | 1  | 2  | 5  | 6  |
| Lymph-BNHL      | d733cf1a-4c42-4def-b6cb-5ef2c6a27fcd | 18 | 27536991  | 27543949  | 8   | 6958  | NA | NA | 1  | 3  | 1  | 3  |
| Lymph-BNHL      | d733cf1a-4c42-4def-b6cb-5ef2c6a27fcd | 18 | 27548266  | 27568112  | 21  | 19846 | NA | NA | 6  | 3  | 3  | 9  |
| Lymph-BNHL      | d733cf1a-4c42-4def-b6cb-5ef2c6a27fcd | 18 | 27570144  | 27576950  | 10  | 6806  | 1  | NA | 3  | 3  | 1  | 2  |
| Lymph-BNHL      | d733cf1a-4c42-4def-b6cb-5ef2c6a27fcd | 21 | 43252191  | 43255384  | 6   | 3193  | NA | NA | 1  | 2  | 2  | 1  |
| Lymph-BNHL      | d733cf1a-4c42-4def-b6cb-5ef2c6a27fcd | 22 | 22724089  | 22764325  | 79  | 40236 | 2  | 5  | 31 | 22 | 6  | 13 |
| Lymph-BNHL      | d733cf1a-4c42-4def-b6cb-5ef2c6a27fcd | 22 | 23223214  | 23287287  | 95  | 64073 | 4  | 13 | 34 | 20 | 11 | 13 |
| Lymph-BNHL      | d733cf1a-4c42-4def-b6cb-5ef2c6a27fcd | X  | 112825880 | 112828446 | 9   | 2566  | 1  | NA | NA | 4  | 2  | 2  |
| Lymph-BNHL      | d733cf1a-4c42-4def-b6cb-5ef2c6a27fcd | X  | 138416366 | 138423475 | 10  | 7109  | 2  | 1  | 2  | 1  | 2  | 2  |
| Ovary-AdenoCA   | d8c2b4b2-e12b-43d2-bafc-87b29f027797 | 5  | 52298726  | 52309543  | 19  | 10817 | NA | 13 | 5  | NA | NA | 1  |
| Ovary-AdenoCA   | d8c2b4b2-e12b-43d2-bafc-87b29f027797 | 9  | 140863039 | 140864210 | 6   | 1171  | 4  | 2  | NA | NA | NA | NA |
| Ovary-AdenoCA   | d8c2b4b2-e12b-43d2-bafc-87b29f027797 | 20 | 31728142  | 31738585  | 12  | 10443 | 3  | 6  | 2  | NA | NA | 1  |
| Ovary-AdenoCA   | d8c2b4b2-e12b-43d2-bafc-87b29f027797 | 20 | 41923992  | 41924944  | 7   | 952   | 1  | 4  | 1  | NA | NA | 1  |
| Breast-AdenoCa  | d8c6d4b8-f279-4edc-aaa3-a1cc266aec4d | 1  | 147407369 | 147408617 | 6   | 1248  | NA | NA | 6  | NA | NA | NA |
| Breast-AdenoCa  | d8c6d4b8-f279-4edc-aaa3-a1cc266aec4d | 1  | 164192963 | 164193446 | 8   | 483   | NA | 6  | 2  | NA | NA | NA |
| Breast-AdenoCa  | d8c6d4b8-f279-4edc-aaa3-a1cc266aec4d | 1  | 165091767 | 165092244 | 9   | 477   | NA | NA | 9  | NA | NA | NA |
| Breast-AdenoCa  | d8c6d4b8-f279-4edc-aaa3-a1cc266aec4d | 2  | 50535431  | 50536066  | 16  | 635   | NA | 5  | 11 | NA | NA | NA |
| Breast-AdenoCa  | d8c6d4b8-f279-4edc-aaa3-a1cc266aec4d | 3  | 108194229 | 108228076 | 41  | 33847 | 1  | 1  | 39 | NA | NA | NA |
| Breast-AdenoCa  | d8c6d4b8-f279-4edc-aaa3-a1cc266aec4d | 4  | 33244968  | 33245804  | 8   | 836   | 3  | 4  | NA | NA | 1  | NA |
| Breast-AdenoCa  | d8c6d4b8-f279-4edc-aaa3-a1cc266aec4d | 6  | 107379536 | 107380567 | 6   | 1031  | NA | 5  | 1  | NA | NA | NA |
| Breast-AdenoCa  | d8c6d4b8-f279-4edc-aaa3-a1cc266aec4d | 10 | 60069632  | 60070143  | 8   | 511   | NA | NA | 8  | NA | NA | NA |
| Breast-AdenoCa  | d8c6d4b8-f279-4edc-aaa3-a1cc266aec4d | 10 | 89437921  | 89438992  | 9   | 1071  | NA | 6  | 3  | NA | NA | NA |
| Breast-AdenoCa  | d8c6d4b8-f279-4edc-aaa3-a1cc266aec4d | 11 | 10724416  | 10727012  | 7   | 2596  | NA | NA | 7  | NA | NA | NA |
| Breast-AdenoCa  | d8c6d4b8-f279-4edc-aaa3-a1cc266aec4d | 11 | 51481069  | 51488288  | 21  | 7219  | NA | 11 | 9  | 1  | NA | NA |
| Breast-AdenoCa  | d8c6d4b8-f279-4edc-aaa3-a1cc266aec4d | 11 | 72170914  | 72171252  | 7   | 338   | 1  | 3  | 3  | NA | NA | NA |
| Breast-AdenoCa  | d8c6d4b8-f279-4edc-aaa3-a1cc266aec4d | 11 | 79969918  | 79970471  | 7   | 553   | 1  | 1  | 5  | NA | NA | NA |
| Breast-AdenoCa  | d8c6d4b8-f279-4edc-aaa3-a1cc266aec4d | 11 | 84518408  | 84519567  | 15  | 1159  | NA | 11 | 4  | NA | NA | NA |
| Breast-AdenoCa  | d8c6d4b8-f279-4edc-aaa3-a1cc266aec4d | 15 | 62247879  | 62254755  | 8   | 6876  | 1  | 1  | 6  | NA | NA | NA |
| Breast-AdenoCa  | d8c6d4b8-f279-4edc-aaa3-a1cc266aec4d | 17 | 45734803  | 45735049  | 13  | 246   | NA | NA | 13 | NA | NA | NA |
| Breast-AdenoCa  | d8c6d4b8-f279-4edc-aaa3-a1cc266aec4d | 18 | 20021557  | 20022702  | 13  | 1145  | NA | 8  | 4  | NA | NA | 1  |
| Breast-AdenoCa  | d8c6d4b8-f279-4edc-aaa3-a1cc266aec4d | 19 | 16138100  | 16139193  | 11  | 1093  | 1  | 5  | 5  | NA | NA | NA |
| Breast-AdenoCa  | d8c6d4b8-f279-4edc-aaa3-a1cc266aec4d | 19 | 21111686  | 21120241  | 15  | 8555  | 3  | 2  | 9  | NA | NA | 1  |
| Breast-AdenoCa  | d8c6d4b8-f279-4edc-aaa3-a1cc266aec4d | 20 | 8163616   | 8173069   | 17  | 9453  | 1  | 12 | 4  | NA | NA | NA |
| Breast-AdenoCa  | d8c6d4b8-f279-4edc-aaa3-a1cc266aec4d | 22 | 37994955  | 38019460  | 31  | 24505 | 6  | 3  | 21 | NA | NA | 1  |
| Breast-AdenoCa  | d8c6d4b8-f279-4edc-aaa3-a1cc266aec4d | X  | 83051583  | 83052094  | 7   | 511   | 1  | 3  | 3  | NA | NA | NA |
| Stomach-AdenoCA | d8d5585d-32cd-4ac4-b410-a4122a17a558 | 15 | 95552021  | 95556799  | 6   | 4778  | 1  | 4  | 1  | NA | NA | NA |
| Stomach-AdenoCA | d8d5585d-32cd-4ac4-b410-a4122a17a558 | 16 | 56671846  | 56671923  | 6   | 77    | 1  | 1  | 1  | 1  | 1  | 1  |

|                  |                                      |    |           |           |    |       |    |    |    |    |    |    |
|------------------|--------------------------------------|----|-----------|-----------|----|-------|----|----|----|----|----|----|
| Bone-Leiomyo     | d8f0becd-fda8-41f4-a424-e082f9eae22c | 2  | 97165463  | 97178008  | 18 | 12545 | 8  | 5  | 5  | NA | NA | NA |
| Bone-Leiomyo     | d8f0becd-fda8-41f4-a424-e082f9eae22c | 2  | 211790960 | 211794965 | 16 | 4005  | 2  | 4  | 9  | NA | 1  | NA |
| Bone-Leiomyo     | d8f0becd-fda8-41f4-a424-e082f9eae22c | 6  | 15706755  | 15711238  | 12 | 4483  | 3  | 2  | 7  | NA | NA | NA |
| Bone-Leiomyo     | d8f0becd-fda8-41f4-a424-e082f9eae22c | 6  | 37181612  | 37190606  | 16 | 8994  | 2  | 7  | 7  | NA | NA | NA |
| Bone-Leiomyo     | d8f0becd-fda8-41f4-a424-e082f9eae22c | 6  | 57014919  | 57017129  | 19 | 2210  | 1  | 7  | 11 | NA | NA | NA |
| Bone-Leiomyo     | d8f0becd-fda8-41f4-a424-e082f9eae22c | 7  | 26822667  | 26827095  | 7  | 4428  | NA | 2  | 5  | NA | NA | NA |
| Bone-Leiomyo     | d8f0becd-fda8-41f4-a424-e082f9eae22c | 7  | 140697472 | 140700443 | 7  | 2971  | NA | 6  | 1  | NA | NA | NA |
| Bone-Leiomyo     | d8f0becd-fda8-41f4-a424-e082f9eae22c | 10 | 37783344  | 37783484  | 9  | 140   | NA | NA | 9  | NA | NA | NA |
| Bone-Leiomyo     | d8f0becd-fda8-41f4-a424-e082f9eae22c | 11 | 88895993  | 88900347  | 7  | 4354  | NA | 3  | 4  | NA | NA | NA |
| Bone-Leiomyo     | d8f0becd-fda8-41f4-a424-e082f9eae22c | 11 | 105359303 | 105361175 | 7  | 1872  | 1  | 3  | 3  | NA | NA | NA |
| Bone-Leiomyo     | d8f0becd-fda8-41f4-a424-e082f9eae22c | 15 | 76034451  | 76039910  | 10 | 5459  | 1  | 3  | 6  | NA | NA | NA |
| Bone-Leiomyo     | d8f0becd-fda8-41f4-a424-e082f9eae22c | 15 | 80430522  | 80432550  | 16 | 2028  | 1  | 5  | 10 | NA | NA | NA |
| Bone-Leiomyo     | d8f0becd-fda8-41f4-a424-e082f9eae22c | 22 | 24219372  | 24220632  | 8  | 1260  | 1  | 2  | 5  | NA | NA | NA |
| Bone-Leiomyo     | d8f0becd-fda8-41f4-a424-e082f9eae22c | 22 | 28334139  | 28340679  | 11 | 6540  | 1  | 7  | 2  | 1  | NA | NA |
| Bone-Leiomyo     | d8f0becd-fda8-41f4-a424-e082f9eae22c | 22 | 30577646  | 30581317  | 17 | 3671  | 3  | 8  | 6  | NA | NA | NA |
| Bone-Leiomyo     | d8f0becd-fda8-41f4-a424-e082f9eae22c | X  | 101873368 | 101877317 | 11 | 3949  | 3  | 3  | 5  | NA | NA | NA |
| Panc-AdenoCA     | d91f487e-0895-44ef-aeb1-a62bd576f8b0 | 1  | 95219996  | 95221847  | 9  | 1851  | NA | 1  | 8  | NA | NA | NA |
| Panc-AdenoCA     | d91f487e-0895-44ef-aeb1-a62bd576f8b0 | 4  | 31862914  | 31866115  | 22 | 3201  | 4  | 7  | 10 | NA | NA | 1  |
| Panc-AdenoCA     | d91f487e-0895-44ef-aeb1-a62bd576f8b0 | 12 | 24030614  | 24033176  | 14 | 2562  | 3  | 5  | 6  | NA | NA | NA |
| Panc-AdenoCA     | d91f487e-0895-44ef-aeb1-a62bd576f8b0 | 12 | 28069320  | 28071326  | 7  | 2006  | NA | 1  | 6  | NA | NA | NA |
| Panc-AdenoCA     | d91f487e-0895-44ef-aeb1-a62bd576f8b0 | 17 | 45289122  | 45289357  | 6  | 235   | NA | 1  | 5  | NA | NA | NA |
| Panc-AdenoCA     | d91f487e-0895-44ef-aeb1-a62bd576f8b0 | 17 | 57904334  | 57910667  | 8  | 6333  | NA | 2  | 4  | NA | 1  | 1  |
| Panc-AdenoCA     | d91f487e-0895-44ef-aeb1-a62bd576f8b0 | 17 | 59395684  | 59397651  | 8  | 1967  | NA | 6  | 2  | NA | NA | NA |
| Panc-AdenoCA     | d91f487e-0895-44ef-aeb1-a62bd576f8b0 | 17 | 59576938  | 59579471  | 12 | 2533  | 1  | 6  | 5  | NA | NA | NA |
| Panc-AdenoCA     | d91f487e-0895-44ef-aeb1-a62bd576f8b0 | 17 | 60117876  | 60118465  | 10 | 589   | 2  | 4  | 4  | NA | NA | NA |
| Panc-AdenoCA     | d91f487e-0895-44ef-aeb1-a62bd576f8b0 | 17 | 64728655  | 64728755  | 7  | 100   | NA | 3  | 4  | NA | NA | NA |
| Kidney-RCC       | d926a39f-d057-4e78-8907-b74f52157d99 | 3  | 76044655  | 76045749  | 8  | 1094  | 2  | 1  | 5  | NA | NA | NA |
| Kidney-RCC       | d926a39f-d057-4e78-8907-b74f52157d99 | 5  | 109500472 | 109500973 | 11 | 501   | 5  | 5  | 1  | NA | NA | NA |
| Kidney-RCC       | d926a39f-d057-4e78-8907-b74f52157d99 | 5  | 112083468 | 112086754 | 8  | 3286  | NA | 3  | 5  | NA | NA | NA |
| ColoRect-AdenoCA | d9690a27-bb02-498e-b15c-ee76e31d16ee | 1  | 242204380 | 242208453 | 6  | 4073  | 2  | 3  | 1  | NA | NA | NA |
| Ovary-AdenoCA    | d9e66fc5-9018-4568-b388-c5eb756f7823 | 10 | 135008734 | 135009587 | 8  | 853   | 2  | 2  | 4  | NA | NA | NA |
| Ovary-AdenoCA    | d9e66fc5-9018-4568-b388-c5eb756f7823 | 17 | 77649189  | 77651728  | 17 | 2539  | 5  | 9  | 3  | NA | NA | NA |
| Ovary-AdenoCA    | d9e66fc5-9018-4568-b388-c5eb756f7823 | 20 | 36623980  | 36628911  | 6  | 4931  | 2  | NA | 4  | NA | NA | NA |
| Ovary-AdenoCA    | d9e66fc5-9018-4568-b388-c5eb756f7823 | 20 | 43584637  | 43585956  | 7  | 1319  | 4  | 2  | 1  | NA | NA | NA |
| Ovary-AdenoCA    | d9e66fc5-9018-4568-b388-c5eb756f7823 | 20 | 43787440  | 43789242  | 9  | 1802  | NA | NA | 2  | 2  | 3  | 2  |
| Ovary-AdenoCA    | d9e66fc5-9018-4568-b388-c5eb756f7823 | 20 | 45128130  | 45128627  | 10 | 497   | NA | 7  | 3  | NA | NA | NA |
| Ovary-AdenoCA    | d9e66fc5-9018-4568-b388-c5eb756f7823 | 20 | 45943996  | 45946768  | 9  | 2772  | 2  | NA | 2  | 1  | 4  | NA |
| Panc-AdenoCA     | da1ed4b9-f428-48aa-834d-1d9673999044 | 6  | 9932072   | 9933839   | 7  | 1767  | NA | 5  | 2  | NA | NA | NA |
| Panc-AdenoCA     | da1ed4b9-f428-48aa-834d-1d9673999044 | 7  | 141736847 | 141737822 | 7  | 975   | 1  | 6  | NA | NA | NA | NA |
| Panc-AdenoCA     | da1ed4b9-f428-48aa-834d-1d9673999044 | 8  | 38046566  | 38050463  | 23 | 3897  | 2  | 10 | 11 | NA | NA | NA |
| Panc-AdenoCA     | da1ed4b9-f428-48aa-834d-1d9673999044 | 12 | 13629184  | 13631854  | 9  | 2670  | 3  | 5  | 1  | NA | NA | NA |
| Panc-AdenoCA     | da1ed4b9-f428-48aa-834d-1d9673999044 | 12 | 25849568  | 25852187  | 11 | 2619  | NA | 6  | 5  | NA | NA | NA |
| Panc-AdenoCA     | da1ed4b9-f428-48aa-834d-1d9673999044 | 13 | 74667739  | 74670378  | 9  | 2639  | 1  | 3  | 5  | NA | NA | NA |
| Panc-AdenoCA     | da1ed4b9-f428-48aa-834d-1d9673999044 | 15 | 83354682  | 83355039  | 7  | 357   | 3  | 2  | 2  | NA | NA | NA |
| Panc-AdenoCA     | da1ed4b9-f428-48aa-834d-1d9673999044 | 18 | 1716618   | 1717150   | 6  | 532   | NA | NA | NA | 1  | 5  | NA |
| Panc-AdenoCA     | da1ed4b9-f428-48aa-834d-1d9673999044 | 22 | 26393598  | 26394199  | 6  | 601   | 1  | 1  | 4  | NA | NA | NA |
| Ovary-AdenoCA    | da43386c-47f8-4e03-b6ca-8b94e13792e7 | 2  | 131834724 | 131834731 | 7  | 7     | NA | 2  | 2  | 1  | 2  | NA |
| Breast-AdenoCa   | dabb5a94-9706-4429-8db0-c328e2004340 | 8  | 30282009  | 30286153  | 16 | 4144  | 2  | 10 | 4  | NA | NA | NA |
| Breast-AdenoCa   | dabb5a94-9706-4429-8db0-c328e2004340 | 20 | 49190914  | 49192259  | 6  | 1345  | 3  | 2  | NA | NA | 1  | NA |
| Panc-AdenoCA     | db2a1df8-487d-4dad-a347-5c5ed539d5ad | 15 | 43430792  | 43434686  | 24 | 3894  | 4  | 6  | 13 | NA | NA | 1  |
| Breast-AdenoCa   | db45d81f-695c-4f99-beea-6dbec1ff47fc | 2  | 199794919 | 199795444 | 10 | 525   | 1  | 6  | 3  | NA | NA | NA |
| Breast-AdenoCa   | db45d81f-695c-4f99-beea-6dbec1ff47fc | 3  | 66999658  | 67001426  | 6  | 1768  | NA | 2  | 4  | NA | NA | NA |
| Breast-AdenoCa   | db45d81f-695c-4f99-beea-6dbec1ff47fc | 3  | 183615700 | 183620290 | 7  | 4590  | 1  | 1  | 5  | NA | NA | NA |
| Breast-AdenoCa   | db45d81f-695c-4f99-beea-6dbec1ff47fc | 4  | 168879057 | 168881535 | 6  | 2478  | NA | 2  | 4  | NA | NA | NA |
| Breast-AdenoCa   | db45d81f-695c-4f99-beea-6dbec1ff47fc | 5  | 65390289  | 65391385  | 6  | 1096  | 1  | NA | 5  | NA | NA | NA |
| Breast-AdenoCa   | db45d81f-695c-4f99-beea-6dbec1ff47fc | 6  | 129617922 | 129621283 | 6  | 3361  | 1  | 4  | 1  | NA | NA | NA |
| Breast-AdenoCa   | db45d81f-695c-4f99-beea-6dbec1ff47fc | 10 | 74701461  | 74707758  | 8  | 6297  | NA | 4  | 4  | NA | NA | NA |
| Breast-AdenoCa   | db45d81f-695c-4f99-beea-6dbec1ff47fc | 11 | 60728515  | 60732595  | 9  | 4080  | 1  | 5  | 3  | NA | NA | NA |
| Breast-AdenoCa   | db45d81f-695c-4f99-beea-6dbec1ff47fc | 11 | 66651827  | 66654845  | 8  | 3018  | NA | 2  | 6  | NA | NA | NA |
| Breast-AdenoCa   | db45d81f-695c-4f99-beea-6dbec1ff47fc | 11 | 70226358  | 70228031  | 11 | 1673  | 1  | 7  | 3  | NA | NA | NA |

|                |                                      |    |           |           |    |       |    |    |    |    |    |    |
|----------------|--------------------------------------|----|-----------|-----------|----|-------|----|----|----|----|----|----|
| Breast-AdenoCa | db45d81f-695c-4f99-beea-6dbec1ff47fc | 11 | 72021503  | 72025477  | 11 | 3974  | 1  | 3  | 7  | NA | NA | NA |
| Breast-AdenoCa | db45d81f-695c-4f99-beea-6dbec1ff47fc | 14 | 64494021  | 64511407  | 31 | 17386 | 3  | 1  | 27 | NA | NA | NA |
| Breast-AdenoCa | db45d81f-695c-4f99-beea-6dbec1ff47fc | 15 | 77087744  | 77093228  | 8  | 5484  | NA | 3  | 5  | NA | NA | NA |
| Breast-AdenoCa | db45d81f-695c-4f99-beea-6dbec1ff47fc | 17 | 37092296  | 37096376  | 6  | 4080  | NA | 4  | 1  | NA | NA | 1  |
| Breast-AdenoCa | db45d81f-695c-4f99-beea-6dbec1ff47fc | 21 | 36757985  | 36758419  | 6  | 434   | NA | 3  | 3  | NA | NA | NA |
| Breast-AdenoCa | db45d81f-695c-4f99-beea-6dbec1ff47fc | X  | 29593924  | 29608394  | 19 | 14470 | NA | 3  | 16 | NA | NA | NA |
| Breast-AdenoCa | db45d81f-695c-4f99-beea-6dbec1ff47fc | X  | 30036007  | 30039222  | 11 | 3215  | 1  | 1  | 3  | 4  | NA | 2  |
| Breast-AdenoCa | db45d81f-695c-4f99-beea-6dbec1ff47fc | X  | 34997660  | 34998855  | 8  | 1195  | 2  | 2  | 4  | NA | NA | NA |
| Breast-AdenoCa | db45d81f-695c-4f99-beea-6dbec1ff47fc | X  | 153253193 | 153254234 | 7  | 1041  | NA | 1  | 6  | NA | NA | NA |
| Kidney-RCC     | db4d1d04-1189-4c0e-99a7-904667af07b5 | 1  | 189115812 | 189117911 | 9  | 2099  | 7  | 1  | 1  | NA | NA | NA |
| Lymph-BNHL     | db9ce6c6-529c-4da6-92c4-f4f3fc3fe109 | 2  | 89159034  | 89160056  | 25 | 1022  | NA | 4  | 1  | 12 | 4  | 4  |
| Lymph-BNHL     | db9ce6c6-529c-4da6-92c4-f4f3fc3fe109 | 5  | 24066705  | 24066822  | 6  | 117   | NA | NA | NA | 2  | 3  | 1  |
| Lymph-BNHL     | db9ce6c6-529c-4da6-92c4-f4f3fc3fe109 | 14 | 106327029 | 106330546 | 47 | 3517  | 1  | 5  | 17 | 15 | 4  | 5  |
| Lymph-BNHL     | db9ce6c6-529c-4da6-92c4-f4f3fc3fe109 | 22 | 23230138  | 23233933  | 21 | 3795  | 1  | 4  | 4  | 6  | 4  | 2  |
| Liver-HCC      | dbfa4e8a-c622-11e3-bf01-24c6515278c0 | 2  | 89164015  | 89165315  | 6  | 1300  | NA | 1  | NA | 4  | 1  | NA |
| Panc-Endocrine | dc4ba4bc-6333-4fe9-8805-e058cc9e6e18 | 1  | 8016292   | 8017269   | 6  | 977   | 2  | 2  | 2  | NA | NA | NA |
| Panc-Endocrine | dc4ba4bc-6333-4fe9-8805-e058cc9e6e18 | 6  | 74507361  | 74508472  | 10 | 1111  | 2  | 3  | 5  | NA | NA | NA |
| Panc-Endocrine | dc4ba4bc-6333-4fe9-8805-e058cc9e6e18 | 13 | 78820537  | 78822122  | 10 | 1585  | 3  | 2  | 5  | NA | NA | NA |
| Lymph-BNHL     | dc4bc4c4-2cc1-4a2e-a9f2-613088af17bf | 1  | 216748538 | 216752063 | 12 | 3525  | NA | NA | NA | 6  | 2  | 4  |
| Lymph-BNHL     | dc4bc4c4-2cc1-4a2e-a9f2-613088af17bf | 6  | 392081    | 393251    | 32 | 1170  | 2  | 6  | 20 | 1  | 2  | 1  |
| Lymph-BNHL     | dc4bc4c4-2cc1-4a2e-a9f2-613088af17bf | 14 | 106211986 | 106213807 | 15 | 1821  | 1  | 2  | 11 | NA | NA | 1  |
| Lymph-BNHL     | dc4bc4c4-2cc1-4a2e-a9f2-613088af17bf | 14 | 106323324 | 106329424 | 58 | 6100  | 3  | 8  | 17 | 20 | 4  | 6  |
| Lymph-BNHL     | dc4bc4c4-2cc1-4a2e-a9f2-613088af17bf | 14 | 106452705 | 106452966 | 8  | 261   | 2  | 2  | 3  | NA | NA | 1  |
| Lymph-BNHL     | dc4bc4c4-2cc1-4a2e-a9f2-613088af17bf | 22 | 23100514  | 23101564  | 9  | 1050  | NA | 1  | 6  | 1  | NA | 1  |
| Prost-AdenoCA  | dc85552c-2488-48d9-9da1-67a380945b85 | 21 | 35611208  | 35616649  | 7  | 5441  | 1  | 1  | 5  | NA | NA | NA |
| Prost-AdenoCA  | dc85552c-2488-48d9-9da1-67a380945b85 | 21 | 42854523  | 42855608  | 9  | 1085  | 1  | NA | 8  | NA | NA | NA |
| Panc-AdenoCA   | dc856038-f5f7-4dfc-a0a4-3e3a6b8d160f | 1  | 207349688 | 207351562 | 9  | 1874  | NA | 3  | 6  | NA | NA | NA |
| Panc-AdenoCA   | dc856038-f5f7-4dfc-a0a4-3e3a6b8d160f | 8  | 39134026  | 39136567  | 18 | 2541  | 1  | 3  | 13 | NA | NA | 1  |
| Ovary-AdenoCA  | dce54d09-9827-4fe2-abe1-c5b7d528ba7f | 6  | 74850091  | 74854703  | 6  | 4612  | 1  | 2  | 3  | NA | NA | NA |
| Ovary-AdenoCA  | dce54d09-9827-4fe2-abe1-c5b7d528ba7f | 7  | 91475023  | 91479050  | 9  | 4027  | 3  | 6  | NA | NA | NA | NA |
| Head-SCC       | dd67dec6-35dd-4efe-b913-ed4884855365 | 15 | 24169960  | 24170830  | 6  | 870   | 2  | 1  | 3  | NA | NA | NA |
| Eso-AdenoCa    | dd7d623b-b9af-4147-9aa6-e09793691f10 | 13 | 24029863  | 24031078  | 6  | 1215  | NA | NA | NA | 1  | 4  | 1  |
| Lymph-BNHL     | dd8f3e1c-6ed6-41c2-957d-6f679a3cb3ca | 2  | 165414889 | 165418419 | 6  | 3530  | 2  | NA | NA | 1  | 2  | 1  |
| Lymph-BNHL     | dd8f3e1c-6ed6-41c2-957d-6f679a3cb3ca | 11 | 38578100  | 38580039  | 6  | 1939  | 1  | 2  | 1  | 1  | NA | 1  |
| Lymph-BNHL     | dd8f3e1c-6ed6-41c2-957d-6f679a3cb3ca | 11 | 89023440  | 89025310  | 7  | 1870  | NA | NA | NA | 3  | 1  | 3  |
| Lymph-BNHL     | dd8f3e1c-6ed6-41c2-957d-6f679a3cb3ca | 14 | 106326300 | 106330424 | 9  | 4124  | 1  | 3  | 5  | NA | NA | NA |
| Lymph-BNHL     | dd8f3e1c-6ed6-41c2-957d-6f679a3cb3ca | 18 | 28549278  | 28551930  | 7  | 2652  | NA | NA | 1  | 2  | 4  | NA |
| Lymph-BNHL     | dd8f3e1c-6ed6-41c2-957d-6f679a3cb3ca | 22 | 23236220  | 23237129  | 8  | 909   | 2  | 4  | 2  | NA | NA | NA |
| Eso-AdenoCa    | de581588-be15-4bf4-95d1-aa5478b53ab6 | 5  | 36225340  | 36225944  | 10 | 604   | NA | 7  | 3  | NA | NA | NA |
| Eso-AdenoCa    | de581588-be15-4bf4-95d1-aa5478b53ab6 | 9  | 33275137  | 33276817  | 7  | 1680  | NA | 5  | 2  | NA | NA | NA |
| Eso-AdenoCa    | de581588-be15-4bf4-95d1-aa5478b53ab6 | 17 | 39276723  | 39278586  | 8  | 1863  | 2  | 2  | 4  | NA | NA | NA |
| Head-SCC       | de8ef60b-4d8e-4aa8-edef-6f58cdfada29 | 11 | 57691385  | 57693716  | 7  | 2331  | 1  | 6  | NA | NA | NA | NA |
| Lymph-CLL      | de99a4de-e916-4572-ac9e-73e341827229 | 2  | 89159475  | 89215113  | 80 | 55638 | 3  | 9  | 7  | 30 | 11 | 20 |
| Lymph-CLL      | de99a4de-e916-4572-ac9e-73e341827229 | 14 | 106238431 | 106240967 | 6  | 2536  | NA | 1  | 4  | NA | 1  | NA |
| Lymph-CLL      | de99a4de-e916-4572-ac9e-73e341827229 | 14 | 106324584 | 106351481 | 72 | 26897 | 4  | 12 | 15 | 21 | 7  | 13 |
| Lymph-CLL      | de99a4de-e916-4572-ac9e-73e341827229 | 14 | 106829709 | 106830576 | 16 | 867   | 1  | 2  | NA | 9  | 1  | 3  |
| Lymph-CLL      | de99a4de-e916-4572-ac9e-73e341827229 | 22 | 23229693  | 23231690  | 7  | 1997  | NA | 2  | 2  | 2  | 1  | NA |
| Uterus-AdenoCA | dec775c5-7d9a-4dc5-b399-dc4b7ba49d73 | 5  | 52537097  | 52540528  | 14 | 3431  | 2  | 2  | 10 | NA | NA | NA |
| Uterus-AdenoCA | dec775c5-7d9a-4dc5-b399-dc4b7ba49d73 | 11 | 60838474  | 60840532  | 7  | 2058  | 1  | 3  | 3  | NA | NA | NA |
| Uterus-AdenoCA | dec775c5-7d9a-4dc5-b399-dc4b7ba49d73 | 19 | 29157084  | 29163797  | 9  | 6713  | 1  | 4  | 4  | NA | NA | NA |
| Panc-AdenoCA   | ded2689b-8e37-480c-b37c-acc538e54ddf | 1  | 107238869 | 107244830 | 11 | 5961  | 1  | 6  | 4  | NA | NA | NA |
| Panc-AdenoCA   | ded2689b-8e37-480c-b37c-acc538e54ddf | 3  | 89745540  | 89746063  | 7  | 523   | NA | 3  | 4  | NA | NA | NA |
| Panc-AdenoCA   | ded2689b-8e37-480c-b37c-acc538e54ddf | 5  | 63817536  | 63818214  | 6  | 678   | 1  | 1  | 4  | NA | NA | NA |
| Panc-AdenoCA   | ded2689b-8e37-480c-b37c-acc538e54ddf | 5  | 112401238 | 112403759 | 10 | 2521  | 2  | 4  | 4  | NA | NA | NA |
| Panc-AdenoCA   | ded2689b-8e37-480c-b37c-acc538e54ddf | 9  | 21879704  | 21880397  | 6  | 693   | 1  | 4  | 1  | NA | NA | NA |
| Panc-AdenoCA   | ded2689b-8e37-480c-b37c-acc538e54ddf | 9  | 30586131  | 30588625  | 14 | 2494  | 2  | 9  | 3  | NA | NA | NA |
| Panc-AdenoCA   | ded2689b-8e37-480c-b37c-acc538e54ddf | 16 | 50625599  | 50628058  | 9  | 2459  | NA | 5  | 4  | NA | NA | NA |
| Panc-AdenoCA   | ded2689b-8e37-480c-b37c-acc538e54ddf | 18 | 48591213  | 48592384  | 13 | 1171  | NA | 1  | 12 | NA | NA | NA |
| Eso-AdenoCa    | ded8b673-53df-4038-a375-7cd0fd2a1b9f | 17 | 67891537  | 67901805  | 16 | 10268 | 2  | 1  | 13 | NA | NA | NA |
| Breast-AdenoCa | df291849-4c35-44e1-b013-8f6b7ee36113 | 1  | 43103936  | 43106024  | 7  | 2088  | 4  | 3  | NA | NA | NA | NA |

|                |                                      |    |           |           |    |       |    |    |    |    |    |    |
|----------------|--------------------------------------|----|-----------|-----------|----|-------|----|----|----|----|----|----|
| Breast-AdenoCa | df291849-4c35-44e1-b013-8f6b7ee36113 | 1  | 162152440 | 162153436 | 9  | 996   | 9  | NA | NA | NA | NA | NA |
| Breast-AdenoCa | df291849-4c35-44e1-b013-8f6b7ee36113 | 1  | 171494253 | 171495905 | 11 | 1652  | 2  | 6  | 2  | NA | NA | 1  |
| Breast-AdenoCa | df291849-4c35-44e1-b013-8f6b7ee36113 | 1  | 174410344 | 174411066 | 7  | 722   | 1  | 4  | 2  | NA | NA | NA |
| Breast-AdenoCa | df291849-4c35-44e1-b013-8f6b7ee36113 | 2  | 174755088 | 174756170 | 9  | 1082  | NA | 6  | 3  | NA | NA | NA |
| Breast-AdenoCa | df291849-4c35-44e1-b013-8f6b7ee36113 | 4  | 61480398  | 61481196  | 6  | 798   | 2  | 1  | 3  | NA | NA | NA |
| Breast-AdenoCa | df291849-4c35-44e1-b013-8f6b7ee36113 | 8  | 37066507  | 37068171  | 11 | 1664  | 1  | 7  | 3  | NA | NA | NA |
| Breast-AdenoCa | df291849-4c35-44e1-b013-8f6b7ee36113 | 8  | 65572941  | 65574191  | 15 | 1250  | 8  | 6  | 1  | NA | NA | NA |
| Breast-AdenoCa | df291849-4c35-44e1-b013-8f6b7ee36113 | 8  | 81346585  | 81346889  | 9  | 304   | 3  | 4  | 2  | NA | NA | NA |
| Breast-AdenoCa | df291849-4c35-44e1-b013-8f6b7ee36113 | 12 | 76310843  | 76315410  | 6  | 4567  | 1  | 1  | 4  | NA | NA | NA |
| Breast-AdenoCa | df291849-4c35-44e1-b013-8f6b7ee36113 | 12 | 84239829  | 84245419  | 11 | 5590  | 2  | 3  | 6  | NA | NA | NA |
| Breast-AdenoCa | df291849-4c35-44e1-b013-8f6b7ee36113 | 14 | 26121286  | 26129617  | 12 | 8331  | 2  | 4  | 5  | NA | 1  | NA |
| Breast-AdenoCa | df291849-4c35-44e1-b013-8f6b7ee36113 | 16 | 14165808  | 14167197  | 12 | 1389  | 3  | 5  | 2  | 1  | NA | 1  |
| Breast-AdenoCa | df291849-4c35-44e1-b013-8f6b7ee36113 | 19 | 32357142  | 32359223  | 10 | 2081  | 5  | 4  | 1  | NA | NA | NA |
| Breast-AdenoCa | df291849-4c35-44e1-b013-8f6b7ee36113 | 19 | 33789211  | 33791509  | 13 | 2298  | 4  | 8  | 1  | NA | NA | NA |
| Breast-AdenoCa | df291849-4c35-44e1-b013-8f6b7ee36113 | 20 | 33716320  | 33718617  | 9  | 2297  | 3  | 6  | NA | NA | NA | NA |
| Breast-AdenoCa | df291849-4c35-44e1-b013-8f6b7ee36113 | 22 | 21944218  | 21949705  | 9  | 5487  | NA | 5  | 4  | NA | NA | NA |
| Bone-Leiomyo   | df4366c4-170f-4233-b577-a8ea277b069c | 1  | 36316207  | 36316860  | 6  | 653   | 3  | 1  | 2  | NA | NA | NA |
| Bone-Leiomyo   | df4366c4-170f-4233-b577-a8ea277b069c | 1  | 182016875 | 182017066 | 7  | 191   | 2  | 2  | 3  | NA | NA | NA |
| Bone-Leiomyo   | df4366c4-170f-4233-b577-a8ea277b069c | 1  | 221543766 | 221547390 | 11 | 3624  | 3  | 2  | 6  | NA | NA | NA |
| Bone-Leiomyo   | df4366c4-170f-4233-b577-a8ea277b069c | 1  | 248445629 | 248450707 | 20 | 5078  | 2  | 9  | 9  | NA | NA | NA |
| Bone-Leiomyo   | df4366c4-170f-4233-b577-a8ea277b069c | 2  | 13636774  | 13638928  | 6  | 2154  | 3  | 1  | 2  | NA | NA | NA |
| Bone-Leiomyo   | df4366c4-170f-4233-b577-a8ea277b069c | 2  | 24854779  | 24855006  | 7  | 227   | 2  | 2  | 3  | NA | NA | NA |
| Bone-Leiomyo   | df4366c4-170f-4233-b577-a8ea277b069c | 2  | 27598864  | 27599243  | 12 | 379   | NA | NA | 12 | NA | NA | NA |
| Bone-Leiomyo   | df4366c4-170f-4233-b577-a8ea277b069c | 2  | 35184758  | 35185861  | 7  | 1103  | NA | 3  | 4  | NA | NA | NA |
| Bone-Leiomyo   | df4366c4-170f-4233-b577-a8ea277b069c | 2  | 177562247 | 177563572 | 10 | 1325  | 1  | 4  | 4  | NA | NA | 1  |
| Bone-Leiomyo   | df4366c4-170f-4233-b577-a8ea277b069c | 2  | 233265034 | 233267849 | 8  | 2815  | NA | 1  | 7  | NA | NA | NA |
| Bone-Leiomyo   | df4366c4-170f-4233-b577-a8ea277b069c | 4  | 37012025  | 37015013  | 11 | 2988  | 2  | 4  | 5  | NA | NA | NA |
| Bone-Leiomyo   | df4366c4-170f-4233-b577-a8ea277b069c | 5  | 6799029   | 6801564   | 7  | 2535  | 2  | 1  | 4  | NA | NA | NA |
| Bone-Leiomyo   | df4366c4-170f-4233-b577-a8ea277b069c | 5  | 126053219 | 126059936 | 12 | 6717  | 2  | 5  | 5  | NA | NA | NA |
| Bone-Leiomyo   | df4366c4-170f-4233-b577-a8ea277b069c | 5  | 135422875 | 135427377 | 10 | 4502  | 2  | 8  | NA | NA | NA | NA |
| Bone-Leiomyo   | df4366c4-170f-4233-b577-a8ea277b069c | 6  | 99011008  | 99013932  | 9  | 2924  | 2  | 2  | 5  | NA | NA | NA |
| Bone-Leiomyo   | df4366c4-170f-4233-b577-a8ea277b069c | 7  | 123018018 | 123018145 | 11 | 127   | NA | NA | 11 | NA | NA | NA |
| Bone-Leiomyo   | df4366c4-170f-4233-b577-a8ea277b069c | 7  | 132065118 | 132065300 | 13 | 182   | NA | 1  | 12 | NA | NA | NA |
| Bone-Leiomyo   | df4366c4-170f-4233-b577-a8ea277b069c | 7  | 133277491 | 133278647 | 10 | 1156  | 1  | 6  | 3  | NA | NA | NA |
| Bone-Leiomyo   | df4366c4-170f-4233-b577-a8ea277b069c | 8  | 626393    | 626632    | 6  | 239   | NA | NA | 6  | NA | NA | NA |
| Bone-Leiomyo   | df4366c4-170f-4233-b577-a8ea277b069c | 8  | 1392189   | 1399037   | 9  | 6848  | 1  | NA | 8  | NA | NA | NA |
| Bone-Leiomyo   | df4366c4-170f-4233-b577-a8ea277b069c | 9  | 78086388  | 78089063  | 11 | 2675  | 1  | 6  | 4  | NA | NA | NA |
| Bone-Leiomyo   | df4366c4-170f-4233-b577-a8ea277b069c | 11 | 9179719   | 9182942   | 6  | 3223  | 1  | 2  | 3  | NA | NA | NA |
| Bone-Leiomyo   | df4366c4-170f-4233-b577-a8ea277b069c | 12 | 55847774  | 55848510  | 6  | 736   | NA | 1  | 5  | NA | NA | NA |
| Bone-Leiomyo   | df4366c4-170f-4233-b577-a8ea277b069c | 12 | 56281308  | 56288225  | 11 | 6917  | 3  | 2  | 6  | NA | NA | NA |
| Bone-Leiomyo   | df4366c4-170f-4233-b577-a8ea277b069c | 12 | 58536337  | 58538507  | 8  | 2170  | NA | 5  | 3  | NA | NA | NA |
| Bone-Leiomyo   | df4366c4-170f-4233-b577-a8ea277b069c | 12 | 65296408  | 65298897  | 12 | 2489  | 1  | 5  | 6  | NA | NA | NA |
| Bone-Leiomyo   | df4366c4-170f-4233-b577-a8ea277b069c | 12 | 68580608  | 68583065  | 16 | 2457  | NA | 3  | 13 | NA | NA | NA |
| Bone-Leiomyo   | df4366c4-170f-4233-b577-a8ea277b069c | 12 | 76843800  | 76845982  | 15 | 2182  | 2  | 5  | 8  | NA | NA | NA |
| Bone-Leiomyo   | df4366c4-170f-4233-b577-a8ea277b069c | 12 | 126131666 | 126133894 | 10 | 2228  | 1  | 6  | 2  | 1  | NA | NA |
| Bone-Leiomyo   | df4366c4-170f-4233-b577-a8ea277b069c | 18 | 62528659  | 62529002  | 6  | 343   | 1  | 2  | 3  | NA | NA | NA |
| Bone-Leiomyo   | df4366c4-170f-4233-b577-a8ea277b069c | 20 | 8351119   | 8355051   | 9  | 3932  | 2  | 1  | 6  | NA | NA | NA |
| Bone-Leiomyo   | df4366c4-170f-4233-b577-a8ea277b069c | X  | 103189312 | 103190336 | 6  | 1024  | NA | NA | 6  | NA | NA | NA |
| Bone-Leiomyo   | df4366c4-170f-4233-b577-a8ea277b069c | X  | 103527888 | 103530230 | 9  | 2342  | 1  | NA | 8  | NA | NA | NA |
| Bone-Leiomyo   | df4366c4-170f-4233-b577-a8ea277b069c | X  | 154205155 | 154211627 | 10 | 6472  | NA | NA | 10 | NA | NA | NA |
| Lymph-BNHL     | df814571-57f1-4e55-bc1a-c892c568c4ba | 2  | 89158123  | 89161238  | 31 | 3115  | 1  | 6  | 10 | 10 | 1  | 3  |
| Lymph-BNHL     | df814571-57f1-4e55-bc1a-c892c568c4ba | 8  | 128748945 | 128752635 | 12 | 3690  | NA | 2  | 5  | 3  | 1  | 1  |
| Lymph-BNHL     | df814571-57f1-4e55-bc1a-c892c568c4ba | 14 | 106325124 | 106383201 | 60 | 58077 | 3  | 19 | 21 | 13 | 3  | 1  |
| Lymph-BNHL     | df814571-57f1-4e55-bc1a-c892c568c4ba | 22 | 23204163  | 23204717  | 8  | 554   | NA | NA | 1  | 3  | 2  | 2  |
| Lymph-BNHL     | df814571-57f1-4e55-bc1a-c892c568c4ba | 22 | 23230196  | 23234668  | 25 | 4472  | 1  | 6  | 12 | 5  | NA | 1  |
| Kidney-RCC     | e053d377-e4f2-4aee-af7d-e61605e0f4f5 | X  | 147029527 | 147029751 | 8  | 224   | 4  | 3  | 1  | NA | NA | NA |
| Cervix-SCC     | e07991a4-0901-4ed1-8704-aa376565d862 | 1  | 16014621  | 16018210  | 7  | 3589  | NA | 4  | 3  | NA | NA | NA |
| Cervix-SCC     | e07991a4-0901-4ed1-8704-aa376565d862 | 6  | 128980834 | 128983924 | 7  | 3090  | NA | NA | 7  | NA | NA | NA |
| Cervix-SCC     | e07991a4-0901-4ed1-8704-aa376565d862 | 7  | 101455328 | 101457369 | 6  | 2041  | 1  | 4  | 1  | NA | NA | NA |
| Cervix-SCC     | e07991a4-0901-4ed1-8704-aa376565d862 | 11 | 122594817 | 122596475 | 11 | 1658  | 3  | 1  | 7  | NA | NA | NA |

|                 |                                       |    |           |           |     |       |    |    |    |    |    |    |
|-----------------|---------------------------------------|----|-----------|-----------|-----|-------|----|----|----|----|----|----|
| Cervix-SCC      | e07991a4-0901-4ed1-8704-aa376565d862  | 19 | 51359309  | 51361307  | 6   | 1998  | NA | 3  | 3  | NA | NA | NA |
| Panc-AdenoCA    | e0aa815f-668a-4de9-bb32-3f215bb7f843  | 2  | 96917502  | 96919245  | 6   | 1743  | 1  | 2  | 3  | NA | NA | NA |
| Panc-AdenoCA    | e0aa815f-668a-4de9-bb32-3f215bb7f843  | 3  | 14504412  | 14509431  | 7   | 5019  | NA | 3  | 4  | NA | NA | NA |
| Panc-AdenoCA    | e0aa815f-668a-4de9-bb32-3f215bb7f843  | 4  | 48516435  | 48519934  | 9   | 3499  | 2  | 3  | 4  | NA | NA | NA |
| Panc-AdenoCA    | e0aa815f-668a-4de9-bb32-3f215bb7f843  | 9  | 21717629  | 21718993  | 9   | 1364  | 1  | 6  | 2  | NA | NA | NA |
| Panc-AdenoCA    | e1df938f-1f23-4291-98ef-13db6debb796  | 6  | 22910842  | 22917736  | 13  | 6894  | 1  | 7  | 5  | NA | NA | NA |
| Lymph-BNHL      | e2b09705-c5c8-48ee-a90e-19648a7bf2cb  | 2  | 89157325  | 89197289  | 72  | 39964 | 2  | 12 | 21 | 19 | 7  | 11 |
| Lymph-BNHL      | e2b09705-c5c8-48ee-a90e-19648a7bf2cb  | 3  | 18099578  | 18104124  | 6   | 4546  | 1  | NA | NA | 1  | NA | 4  |
| Lymph-BNHL      | e2b09705-c5c8-48ee-a90e-19648a7bf2cb  | 3  | 20322165  | 20333127  | 13  | 10962 | 1  | NA | 1  | 8  | NA | 3  |
| Lymph-BNHL      | e2b09705-c5c8-48ee-a90e-19648a7bf2cb  | 3  | 164226698 | 164234652 | 10  | 7954  | NA | 1  | 2  | 5  | 2  | NA |
| Lymph-BNHL      | e2b09705-c5c8-48ee-a90e-19648a7bf2cb  | 4  | 104912043 | 104922811 | 14  | 10768 | NA | NA | 7  | 3  | 2  | 2  |
| Lymph-BNHL      | e2b09705-c5c8-48ee-a90e-19648a7bf2cb  | 5  | 103671914 | 103687531 | 23  | 15617 | NA | NA | NA | 12 | 2  | 9  |
| Lymph-BNHL      | e2b09705-c5c8-48ee-a90e-19648a7bf2cb  | 5  | 168747129 | 168752302 | 9   | 5173  | NA | NA | 2  | 3  | 1  | 3  |
| Lymph-BNHL      | e2b09705-c5c8-48ee-a90e-19648a7bf2cb  | 6  | 40120611  | 40125282  | 6   | 4671  | 1  | 1  | 1  | 2  | 1  | NA |
| Lymph-BNHL      | e2b09705-c5c8-48ee-a90e-19648a7bf2cb  | 6  | 79294330  | 79295056  | 7   | 726   | NA | NA | NA | 6  | 1  | NA |
| Lymph-BNHL      | e2b09705-c5c8-48ee-a90e-19648a7bf2cb  | 11 | 24745863  | 24758814  | 19  | 12951 | 4  | 2  | 4  | NA | 2  | 7  |
| Lymph-BNHL      | e2b09705-c5c8-48ee-a90e-19648a7bf2cb  | 12 | 87944114  | 87947805  | 8   | 3691  | NA | 2  | 1  | 3  | NA | 2  |
| Lymph-BNHL      | e2b09705-c5c8-48ee-a90e-19648a7bf2cb  | 13 | 81745171  | 81749234  | 7   | 4063  | NA | NA | NA | 2  | 2  | 3  |
| Lymph-BNHL      | e2b09705-c5c8-48ee-a90e-19648a7bf2cb  | 14 | 84613409  | 84620975  | 11  | 7566  | NA | 1  | 1  | 5  | NA | 4  |
| Lymph-BNHL      | e2b09705-c5c8-48ee-a90e-19648a7bf2cb  | 14 | 106211512 | 106212487 | 12  | 975   | 1  | 4  | 7  | NA | NA | NA |
| Lymph-BNHL      | e2b09705-c5c8-48ee-a90e-19648a7bf2cb  | 14 | 106323842 | 106330012 | 53  | 6170  | 5  | 12 | 21 | 7  | 1  | 7  |
| Lymph-BNHL      | e2b09705-c5c8-48ee-a90e-19648a7bf2cb  | 14 | 106573618 | 106579740 | 33  | 6122  | NA | 3  | 12 | 11 | 3  | 4  |
| Lymph-BNHL      | e2b09705-c5c8-48ee-a90e-19648a7bf2cb  | 18 | 60983695  | 60988231  | 31  | 4536  | 2  | 6  | 7  | 5  | 7  | 4  |
| Lymph-BNHL      | e2b09705-c5c8-48ee-a90e-19648a7bf2cb  | 22 | 23028899  | 23035337  | 10  | 6438  | NA | 2  | 4  | NA | 1  | 3  |
| Lymph-BNHL      | e2b09705-c5c8-48ee-a90e-19648a7bf2cb  | 22 | 23039920  | 23041379  | 9   | 1459  | 1  | 2  | 3  | 2  | NA | 1  |
| Lymph-BNHL      | e2b09705-c5c8-48ee-a90e-19648a7bf2cb  | X  | 32312421  | 32315936  | 13  | 3515  | 3  | 2  | 3  | 4  | NA | 1  |
| Lymph-BNHL      | e2b09705-c5c8-48ee-a90e-19648a7bf2cb  | X  | 100580958 | 100584966 | 8   | 4008  | NA | NA | 2  | 4  | NA | 2  |
| Head-SCC        | e2e6a409-b64d-463c-ac3b-e7987a3124f0  | 2  | 202105725 | 202111350 | 33  | 5625  | 4  | 12 | 17 | NA | NA | NA |
| Head-SCC        | e2e6a409-b64d-463c-ac3b-e7987a3124f0  | 9  | 114625015 | 114627186 | 6   | 2171  | NA | 3  | 3  | NA | NA | NA |
| Head-SCC        | e2e6a409-b64d-463c-ac3b-e7987a3124f0  | 11 | 18084825  | 18087068  | 6   | 2243  | 1  | 1  | 4  | NA | NA | NA |
| Lymph-BNHL      | e2fa7251-507e-4d76-95a3-a228adc3885a  | 2  | 35540005  | 35542867  | 6   | 2862  | 1  | NA | NA | 2  | 1  | 2  |
| Lymph-BNHL      | e2fa7251-507e-4d76-95a3-a228adc3885a  | 2  | 89155476  | 89247653  | 95  | 92177 | 1  | 17 | 5  | 37 | 20 | 15 |
| Lymph-BNHL      | e2fa7251-507e-4d76-95a3-a228adc3885a  | 14 | 40972401  | 40976409  | 8   | 4008  | NA | NA | 1  | 1  | 1  | 5  |
| Lymph-BNHL      | e2fa7251-507e-4d76-95a3-a228adc3885a  | 14 | 106094322 | 106095489 | 7   | 1167  | 1  | 2  | 2  | 1  | NA | 1  |
| Lymph-BNHL      | e2fa7251-507e-4d76-95a3-a228adc3885a  | 14 | 106112702 | 106114310 | 12  | 1608  | 1  | 4  | 6  | NA | NA | 1  |
| Lymph-BNHL      | e2fa7251-507e-4d76-95a3-a228adc3885a  | 14 | 106210665 | 106231597 | 29  | 20932 | 1  | 13 | 12 | 3  | NA | NA |
| Lymph-BNHL      | e2fa7251-507e-4d76-95a3-a228adc3885a  | 14 | 106323353 | 106369717 | 117 | 46364 | 3  | 21 | 31 | 29 | 14 | 19 |
| Lymph-BNHL      | e2fa7251-507e-4d76-95a3-a228adc3885a  | 14 | 106573618 | 106579577 | 22  | 5959  | NA | 5  | 2  | 13 | 1  | 1  |
| Lymph-BNHL      | e2fa7251-507e-4d76-95a3-a228adc3885a  | 22 | 23204552  | 23210178  | 11  | 5626  | 1  | NA | 2  | 2  | 4  | 2  |
| Lymph-BNHL      | e2fa7251-507e-4d76-95a3-a228adc3885a  | 22 | 23223389  | 23232996  | 53  | 9607  | 1  | 8  | 7  | 21 | 10 | 6  |
| Ovary-AdenoCA   | e45f3391-2e74-4767-817a-280cebacc7c57 | 10 | 79537698  | 79540853  | 25  | 3155  | 1  | 15 | 9  | NA | NA | NA |
| Ovary-AdenoCA   | e45f3391-2e74-4767-817a-280cebacc7c57 | 12 | 60906674  | 60908008  | 6   | 1334  | 1  | NA | NA | 3  | NA | 2  |
| Ovary-AdenoCA   | e45f3391-2e74-4767-817a-280cebacc7c57 | 16 | 27450741  | 27457701  | 9   | 6960  | 2  | 1  | 6  | NA | NA | NA |
| Ovary-AdenoCA   | e45f3391-2e74-4767-817a-280cebacc7c57 | 16 | 27461091  | 27467814  | 8   | 6723  | 4  | 3  | 1  | NA | NA | NA |
| Ovary-AdenoCA   | e4aaca83-3ae9-47f6-a975-c144767ad705  | 1  | 37876563  | 37876977  | 7   | 414   | 1  | 2  | 4  | NA | NA | NA |
| Ovary-AdenoCA   | e4aaca83-3ae9-47f6-a975-c144767ad705  | 1  | 43862028  | 43863678  | 10  | 1650  | 2  | 3  | 5  | NA | NA | NA |
| Ovary-AdenoCA   | e4aaca83-3ae9-47f6-a975-c144767ad705  | 1  | 230780814 | 230782332 | 8   | 1518  | 1  | 5  | 2  | NA | NA | NA |
| Ovary-AdenoCA   | e4aaca83-3ae9-47f6-a975-c144767ad705  | 8  | 142567772 | 142572383 | 7   | 4611  | 1  | 4  | 2  | NA | NA | NA |
| Ovary-AdenoCA   | e4aaca83-3ae9-47f6-a975-c144767ad705  | 10 | 55560205  | 55561963  | 8   | 1758  | 3  | 2  | 2  | NA | 1  | NA |
| Ovary-AdenoCA   | e4aaca83-3ae9-47f6-a975-c144767ad705  | 11 | 121585407 | 121590173 | 15  | 4766  | 1  | 10 | 4  | NA | NA | NA |
| Ovary-AdenoCA   | e4aaca83-3ae9-47f6-a975-c144767ad705  | 12 | 20328616  | 20328850  | 7   | 234   | NA | 4  | 3  | NA | NA | NA |
| Ovary-AdenoCA   | e4aaca83-3ae9-47f6-a975-c144767ad705  | 17 | 50809490  | 50813714  | 10  | 4224  | 1  | 7  | 2  | NA | NA | NA |
| Ovary-AdenoCA   | e4aaca83-3ae9-47f6-a975-c144767ad705  | 17 | 50876161  | 50877277  | 7   | 1116  | NA | 2  | 5  | NA | NA | NA |
| Ovary-AdenoCA   | e4aaca83-3ae9-47f6-a975-c144767ad705  | 19 | 33465216  | 33472828  | 10  | 7612  | 3  | 2  | 5  | NA | NA | NA |
| Ovary-AdenoCA   | e4aaca83-3ae9-47f6-a975-c144767ad705  | 19 | 37302105  | 37302443  | 7   | 338   | 3  | 2  | 2  | NA | NA | NA |
| Panc-AdenoCA    | e4c8c7f0-5bac-4d59-91c4-c98207150548  | 12 | 113346709 | 113346740 | 7   | 31    | 2  | NA | 3  | NA | 2  | NA |
| Biliary-AdenoCA | e4fd1b3e-c622-11e3-bf01-24c6515278c0  | 5  | 51677634  | 51678061  | 7   | 427   | NA | 1  | 6  | NA | NA | NA |
| Panc-AdenoCA    | e5193d7e-e8b7-4098-bf98-8b3a62781d13  | 2  | 77777923  | 77782490  | 6   | 4567  | NA | NA | NA | 2  | 1  | 3  |
| Panc-AdenoCA    | e5193d7e-e8b7-4098-bf98-8b3a62781d13  | 11 | 118674742 | 118676443 | 8   | 1701  | 2  | 2  | 4  | NA | NA | NA |
| Panc-AdenoCA    | e5193d7e-e8b7-4098-bf98-8b3a62781d13  | X  | 98825231  | 98826574  | 9   | 1343  | NA | NA | 8  | NA | NA | 1  |



|                |                                      |    |           |           |    |       |    |    |    |    |    |    |
|----------------|--------------------------------------|----|-----------|-----------|----|-------|----|----|----|----|----|----|
| Breast-AdenoCa | e5593865-5f8e-4a4c-b36f-73fbe64d66da | 6  | 157975878 | 157977622 | 16 | 1744  | NA | NA | 16 | NA | NA | NA |
| Breast-AdenoCa | e5593865-5f8e-4a4c-b36f-73fbe64d66da | 7  | 8365317   | 8365720   | 8  | 403   | NA | NA | 8  | NA | NA | NA |
| Breast-AdenoCa | e5593865-5f8e-4a4c-b36f-73fbe64d66da | 7  | 10064919  | 10067371  | 11 | 2452  | 3  | 6  | 2  | NA | NA | NA |
| Breast-AdenoCa | e5593865-5f8e-4a4c-b36f-73fbe64d66da | 7  | 21850956  | 21851755  | 14 | 799   | NA | NA | 14 | NA | NA | NA |
| Breast-AdenoCa | e5593865-5f8e-4a4c-b36f-73fbe64d66da | 8  | 37658687  | 37659860  | 10 | 1173  | NA | NA | 10 | NA | NA | NA |
| Breast-AdenoCa | e5593865-5f8e-4a4c-b36f-73fbe64d66da | 8  | 37699688  | 37700919  | 19 | 1231  | NA | NA | 19 | NA | NA | NA |
| Breast-AdenoCa | e5593865-5f8e-4a4c-b36f-73fbe64d66da | 8  | 56070103  | 56071512  | 21 | 1409  | NA | NA | 21 | NA | NA | NA |
| Breast-AdenoCa | e5593865-5f8e-4a4c-b36f-73fbe64d66da | 8  | 58414800  | 58444071  | 52 | 29271 | NA | NA | 52 | NA | NA | NA |
| Breast-AdenoCa | e5593865-5f8e-4a4c-b36f-73fbe64d66da | 8  | 58483757  | 58484545  | 17 | 788   | NA | 1  | 16 | NA | NA | NA |
| Breast-AdenoCa | e5593865-5f8e-4a4c-b36f-73fbe64d66da | 8  | 70938658  | 70939101  | 13 | 443   | NA | NA | 13 | NA | NA | NA |
| Breast-AdenoCa | e5593865-5f8e-4a4c-b36f-73fbe64d66da | 8  | 71149010  | 71171319  | 71 | 22309 | NA | NA | 71 | NA | NA | NA |
| Breast-AdenoCa | e5593865-5f8e-4a4c-b36f-73fbe64d66da | 8  | 72928230  | 72931142  | 11 | 2912  | NA | NA | 11 | NA | NA | NA |
| Breast-AdenoCa | e5593865-5f8e-4a4c-b36f-73fbe64d66da | 16 | 51784340  | 51805279  | 27 | 20939 | 2  | 6  | 18 | 1  | NA | NA |
| Breast-AdenoCa | e5593865-5f8e-4a4c-b36f-73fbe64d66da | 17 | 27892449  | 27892905  | 6  | 456   | NA | NA | 6  | NA | NA | NA |
| Breast-AdenoCa | e5593865-5f8e-4a4c-b36f-73fbe64d66da | 17 | 35205858  | 35207054  | 7  | 1196  | 2  | 3  | 2  | NA | NA | NA |
| Panc-AdenoCA   | e56b0990-ff67-47c1-b9ad-87ef1d4aa2ae | 2  | 28098419  | 28098984  | 6  | 565   | NA | 1  | 5  | NA | NA | NA |
| Panc-AdenoCA   | e56b0990-ff67-47c1-b9ad-87ef1d4aa2ae | 4  | 111731332 | 111732841 | 8  | 1509  | NA | 2  | 6  | NA | NA | NA |
| Panc-AdenoCA   | e56b0990-ff67-47c1-b9ad-87ef1d4aa2ae | 4  | 147990352 | 147996249 | 22 | 5897  | 2  | 9  | 11 | NA | NA | NA |
| Panc-AdenoCA   | e56b0990-ff67-47c1-b9ad-87ef1d4aa2ae | 5  | 103864390 | 103870347 | 12 | 5957  | 1  | NA | NA | NA | 2  | 9  |
| Panc-AdenoCA   | e56b0990-ff67-47c1-b9ad-87ef1d4aa2ae | 8  | 86466320  | 86467667  | 6  | 1347  | NA | NA | NA | 3  | 2  | 1  |
| Panc-AdenoCA   | e56b0990-ff67-47c1-b9ad-87ef1d4aa2ae | 14 | 97298183  | 97302515  | 7  | 4332  | NA | NA | NA | 3  | 4  | NA |
| Panc-AdenoCA   | e56b0990-ff67-47c1-b9ad-87ef1d4aa2ae | 21 | 16626404  | 16627179  | 6  | 775   | NA | 4  | 2  | NA | NA | NA |
| Panc-AdenoCA   | e56b0990-ff67-47c1-b9ad-87ef1d4aa2ae | 22 | 22422599  | 22423361  | 13 | 762   | 5  | 3  | 5  | NA | NA | NA |
| Panc-AdenoCA   | e56b0990-ff67-47c1-b9ad-87ef1d4aa2ae | 22 | 27022166  | 27023243  | 10 | 1077  | 1  | 1  | 8  | NA | NA | NA |
| Lymph-BNHL     | e6168db0-d12f-4218-8ab9-bd704201cb2b | 1  | 203274775 | 203276001 | 30 | 1226  | 5  | 7  | 12 | 3  | 1  | 2  |
| Lymph-BNHL     | e6168db0-d12f-4218-8ab9-bd704201cb2b | 1  | 226921342 | 226926196 | 11 | 4854  | NA | 3  | 4  | 2  | 1  | 1  |
| Lymph-BNHL     | e6168db0-d12f-4218-8ab9-bd704201cb2b | 2  | 36097584  | 36102516  | 6  | 4932  | NA | NA | 2  | 2  | NA | 2  |
| Lymph-BNHL     | e6168db0-d12f-4218-8ab9-bd704201cb2b | 2  | 81744955  | 81749802  | 9  | 4847  | NA | NA | NA | 6  | 2  | 1  |
| Lymph-BNHL     | e6168db0-d12f-4218-8ab9-bd704201cb2b | 2  | 89127688  | 89134144  | 9  | 6456  | NA | 3  | 2  | 2  | NA | 2  |
| Lymph-BNHL     | e6168db0-d12f-4218-8ab9-bd704201cb2b | 2  | 89157390  | 89159876  | 68 | 2486  | 3  | 2  | 10 | 28 | 13 | 12 |
| Lymph-BNHL     | e6168db0-d12f-4218-8ab9-bd704201cb2b | 2  | 89247182  | 89248026  | 30 | 844   | NA | 1  | 7  | 12 | 6  | 4  |
| Lymph-BNHL     | e6168db0-d12f-4218-8ab9-bd704201cb2b | 2  | 189538431 | 189558722 | 23 | 20291 | 2  | 7  | 4  | 7  | 2  | 1  |
| Lymph-BNHL     | e6168db0-d12f-4218-8ab9-bd704201cb2b | 3  | 77617391  | 77621021  | 16 | 3630  | 2  | 4  | 1  | 6  | 1  | 2  |
| Lymph-BNHL     | e6168db0-d12f-4218-8ab9-bd704201cb2b | 3  | 84059681  | 84065411  | 7  | 5730  | NA | NA | NA | 4  | 2  | 1  |
| Lymph-BNHL     | e6168db0-d12f-4218-8ab9-bd704201cb2b | 3  | 187461912 | 187463782 | 28 | 1870  | 2  | 6  | 5  | 8  | 4  | 3  |
| Lymph-BNHL     | e6168db0-d12f-4218-8ab9-bd704201cb2b | 4  | 11072386  | 11072618  | 6  | 232   | 1  | NA | 5  | NA | NA | NA |
| Lymph-BNHL     | e6168db0-d12f-4218-8ab9-bd704201cb2b | 4  | 40195908  | 40200747  | 17 | 4839  | NA | 3  | 2  | 6  | 3  | 3  |
| Lymph-BNHL     | e6168db0-d12f-4218-8ab9-bd704201cb2b | 4  | 131845470 | 131851399 | 7  | 5929  | 1  | NA | NA | 1  | 1  | 4  |
| Lymph-BNHL     | e6168db0-d12f-4218-8ab9-bd704201cb2b | 5  | 28275561  | 28280702  | 7  | 5141  | NA | NA | NA | 3  | 1  | 3  |
| Lymph-BNHL     | e6168db0-d12f-4218-8ab9-bd704201cb2b | 5  | 149791471 | 149796420 | 8  | 4949  | NA | NA | 3  | 1  | 2  | 2  |
| Lymph-BNHL     | e6168db0-d12f-4218-8ab9-bd704201cb2b | 6  | 14118181  | 14119035  | 6  | 854   | 1  | 4  | NA | 1  | NA | NA |
| Lymph-BNHL     | e6168db0-d12f-4218-8ab9-bd704201cb2b | 7  | 71609679  | 71614668  | 6  | 4989  | NA | 4  | NA | NA | 2  | NA |
| Lymph-BNHL     | e6168db0-d12f-4218-8ab9-bd704201cb2b | 7  | 82431072  | 82432804  | 7  | 1732  | NA | NA | NA | 4  | NA | 3  |
| Lymph-BNHL     | e6168db0-d12f-4218-8ab9-bd704201cb2b | 7  | 83580974  | 83583725  | 7  | 2751  | NA | NA | 2  | 5  | NA | NA |
| Lymph-BNHL     | e6168db0-d12f-4218-8ab9-bd704201cb2b | 8  | 2859862   | 2862750   | 8  | 2888  | 1  | NA | 2  | 5  | NA | NA |
| Lymph-BNHL     | e6168db0-d12f-4218-8ab9-bd704201cb2b | 8  | 34713591  | 34721483  | 11 | 7892  | NA | 2  | 4  | 2  | 1  | 2  |
| Lymph-BNHL     | e6168db0-d12f-4218-8ab9-bd704201cb2b | 8  | 109995341 | 109997352 | 9  | 2011  | NA | 5  | 4  | NA | NA | NA |
| Lymph-BNHL     | e6168db0-d12f-4218-8ab9-bd704201cb2b | 9  | 28494099  | 28499664  | 7  | 5565  | NA | 1  | NA | 3  | NA | 3  |
| Lymph-BNHL     | e6168db0-d12f-4218-8ab9-bd704201cb2b | 9  | 37383943  | 37386962  | 10 | 3019  | NA | 4  | 2  | 2  | 1  | 1  |
| Lymph-BNHL     | e6168db0-d12f-4218-8ab9-bd704201cb2b | 11 | 39928113  | 39941211  | 20 | 13098 | 1  | 1  | 5  | 4  | 7  | 2  |
| Lymph-BNHL     | e6168db0-d12f-4218-8ab9-bd704201cb2b | 11 | 90519810  | 90525471  | 7  | 5661  | 2  | 1  | NA | NA | 1  | 3  |
| Lymph-BNHL     | e6168db0-d12f-4218-8ab9-bd704201cb2b | 11 | 102188536 | 102189572 | 9  | 1036  | NA | 1  | 1  | 1  | 4  | 2  |
| Lymph-BNHL     | e6168db0-d12f-4218-8ab9-bd704201cb2b | 12 | 113493864 | 113511662 | 36 | 17798 | 1  | 7  | 14 | 10 | 1  | 3  |
| Lymph-BNHL     | e6168db0-d12f-4218-8ab9-bd704201cb2b | 12 | 122458512 | 122463215 | 20 | 4703  | 1  | 5  | 5  | 1  | 6  | 2  |
| Lymph-BNHL     | e6168db0-d12f-4218-8ab9-bd704201cb2b | 13 | 23715932  | 23718556  | 7  | 2624  | NA | 2  | 5  | NA | NA | NA |
| Lymph-BNHL     | e6168db0-d12f-4218-8ab9-bd704201cb2b | 13 | 70123286  | 70128939  | 11 | 5653  | NA | NA | 2  | 5  | 1  | 3  |
| Lymph-BNHL     | e6168db0-d12f-4218-8ab9-bd704201cb2b | 14 | 51260555  | 51261448  | 7  | 893   | NA | NA | 2  | NA | 4  | 1  |
| Lymph-BNHL     | e6168db0-d12f-4218-8ab9-bd704201cb2b | 14 | 51749051  | 51760104  | 14 | 11053 | 2  | 6  | NA | 4  | 1  | 1  |
| Lymph-BNHL     | e6168db0-d12f-4218-8ab9-bd704201cb2b | 14 | 64192974  | 64193544  | 8  | 570   | 1  | NA | 1  | 3  | 1  | 2  |
| Lymph-BNHL     | e6168db0-d12f-4218-8ab9-bd704201cb2b | 14 | 69258266  | 69259492  | 10 | 1226  | NA | 1  | 8  | 1  | NA | NA |

|               |                                      |    |           |           |     |       |    |    |    |    |    |    |
|---------------|--------------------------------------|----|-----------|-----------|-----|-------|----|----|----|----|----|----|
| Lymph-BNHL    | e6168db0-d12f-4218-8ab9-bd704201cb2b | 14 | 106212568 | 106285376 | 91  | 72808 | 11 | 20 | 48 | 7  | 4  | 1  |
| Lymph-BNHL    | e6168db0-d12f-4218-8ab9-bd704201cb2b | 14 | 106322791 | 106339117 | 169 | 16326 | 8  | 27 | 47 | 41 | 16 | 30 |
| Lymph-BNHL    | e6168db0-d12f-4218-8ab9-bd704201cb2b | 14 | 107112925 | 107114114 | 15  | 1189  | 2  | 1  | 3  | 4  | 3  | 2  |
| Lymph-BNHL    | e6168db0-d12f-4218-8ab9-bd704201cb2b | 15 | 27650276  | 27655147  | 10  | 4871  | 1  | 3  | 5  | 1  | NA | NA |
| Lymph-BNHL    | e6168db0-d12f-4218-8ab9-bd704201cb2b | 15 | 41819073  | 41822802  | 13  | 3729  | NA | NA | 13 | NA | NA | NA |
| Lymph-BNHL    | e6168db0-d12f-4218-8ab9-bd704201cb2b | 18 | 19099573  | 19103661  | 18  | 4088  | 3  | 7  | 7  | NA | NA | 1  |
| Lymph-BNHL    | e6168db0-d12f-4218-8ab9-bd704201cb2b | 19 | 10340860  | 10341565  | 11  | 705   | 2  | NA | 6  | 2  | NA | 1  |
| Lymph-BNHL    | e6168db0-d12f-4218-8ab9-bd704201cb2b | 20 | 3532716   | 3532984   | 6   | 268   | NA | NA | NA | 4  | 1  | 1  |
| Lymph-BNHL    | e6168db0-d12f-4218-8ab9-bd704201cb2b | 21 | 21877568  | 21884155  | 8   | 6587  | NA | NA | 2  | 3  | NA | 3  |
| Lymph-BNHL    | e6168db0-d12f-4218-8ab9-bd704201cb2b | 21 | 21886965  | 21891958  | 8   | 4993  | 1  | 1  | 1  | 4  | NA | 1  |
| Lymph-BNHL    | e6168db0-d12f-4218-8ab9-bd704201cb2b | 21 | 21907763  | 21913500  | 7   | 5737  | NA | NA | NA | 2  | 2  | 3  |
| Lymph-BNHL    | e6168db0-d12f-4218-8ab9-bd704201cb2b | 22 | 23198865  | 23199575  | 9   | 710   | NA | NA | 7  | 2  | NA | NA |
| Lymph-BNHL    | e6168db0-d12f-4218-8ab9-bd704201cb2b | 22 | 23223132  | 23235628  | 100 | 12496 | 4  | 22 | 33 | 22 | 6  | 13 |
| Lymph-BNHL    | e6168db0-d12f-4218-8ab9-bd704201cb2b | X  | 64071688  | 64072158  | 6   | 470   | NA | 1  | NA | 2  | 1  | 2  |
| Bladder-TCC   | e6c78a98-f45b-482b-a551-4f11b8c1ff8b | 1  | 88887238  | 88890134  | 11  | 2896  | 1  | 8  | 2  | NA | NA | NA |
| Bladder-TCC   | e6c78a98-f45b-482b-a551-4f11b8c1ff8b | 1  | 150606414 | 150612322 | 11  | 5908  | 1  | 4  | 6  | NA | NA | NA |
| Bladder-TCC   | e6c78a98-f45b-482b-a551-4f11b8c1ff8b | 2  | 19160708  | 19164445  | 6   | 3737  | NA | 5  | 1  | NA | NA | NA |
| Bladder-TCC   | e6c78a98-f45b-482b-a551-4f11b8c1ff8b | 2  | 136229468 | 136230808 | 7   | 1340  | NA | 1  | 6  | NA | NA | NA |
| Bladder-TCC   | e6c78a98-f45b-482b-a551-4f11b8c1ff8b | 3  | 52629794  | 52632341  | 7   | 2547  | NA | 4  | 3  | NA | NA | NA |
| Bladder-TCC   | e6c78a98-f45b-482b-a551-4f11b8c1ff8b | 3  | 80055744  | 80057627  | 11  | 1883  | NA | 6  | 5  | NA | NA | NA |
| Bladder-TCC   | e6c78a98-f45b-482b-a551-4f11b8c1ff8b | 3  | 128748321 | 128753404 | 10  | 5083  | NA | 10 | NA | NA | NA | NA |
| Bladder-TCC   | e6c78a98-f45b-482b-a551-4f11b8c1ff8b | 4  | 134115225 | 134122094 | 11  | 6869  | 1  | 6  | 4  | NA | NA | NA |
| Bladder-TCC   | e6c78a98-f45b-482b-a551-4f11b8c1ff8b | 4  | 148703741 | 148710235 | 11  | 6494  | NA | 3  | 8  | NA | NA | NA |
| Bladder-TCC   | e6c78a98-f45b-482b-a551-4f11b8c1ff8b | 5  | 39809849  | 39811380  | 6   | 1531  | 1  | 3  | 1  | NA | NA | 1  |
| Bladder-TCC   | e6c78a98-f45b-482b-a551-4f11b8c1ff8b | 6  | 157027028 | 157029571 | 6   | 2543  | 1  | 1  | 4  | NA | NA | NA |
| Bladder-TCC   | e6c78a98-f45b-482b-a551-4f11b8c1ff8b | 7  | 146583822 | 146584031 | 7   | 209   | 1  | 2  | 4  | NA | NA | NA |
| Bladder-TCC   | e6c78a98-f45b-482b-a551-4f11b8c1ff8b | 8  | 24794705  | 24795792  | 8   | 1087  | 1  | 4  | 3  | NA | NA | NA |
| Bladder-TCC   | e6c78a98-f45b-482b-a551-4f11b8c1ff8b | 9  | 19248504  | 19252776  | 7   | 4272  | 1  | 4  | 2  | NA | NA | NA |
| Bladder-TCC   | e6c78a98-f45b-482b-a551-4f11b8c1ff8b | 9  | 133497184 | 133498981 | 11  | 1797  | 1  | 4  | 6  | NA | NA | NA |
| Bladder-TCC   | e6c78a98-f45b-482b-a551-4f11b8c1ff8b | 10 | 9154398   | 9156581   | 7   | 2183  | NA | 6  | 1  | NA | NA | NA |
| Bladder-TCC   | e6c78a98-f45b-482b-a551-4f11b8c1ff8b | 12 | 110409411 | 110412264 | 7   | 2853  | NA | 6  | 1  | NA | NA | NA |
| Bladder-TCC   | e6c78a98-f45b-482b-a551-4f11b8c1ff8b | 13 | 41717532  | 41722433  | 8   | 4901  | 1  | 4  | 3  | NA | NA | NA |
| Bladder-TCC   | e6c78a98-f45b-482b-a551-4f11b8c1ff8b | 13 | 99082799  | 99086442  | 9   | 3643  | 2  | 5  | 2  | NA | NA | NA |
| Bladder-TCC   | e6c78a98-f45b-482b-a551-4f11b8c1ff8b | 14 | 40356576  | 40360572  | 8   | 3996  | 1  | 5  | 2  | NA | NA | NA |
| Bladder-TCC   | e6c78a98-f45b-482b-a551-4f11b8c1ff8b | 14 | 90165460  | 90167183  | 7   | 1723  | 1  | 4  | 2  | NA | NA | NA |
| Bladder-TCC   | e6c78a98-f45b-482b-a551-4f11b8c1ff8b | 16 | 4268218   | 4269744   | 7   | 1526  | 4  | 2  | 1  | NA | NA | NA |
| Bladder-TCC   | e6c78a98-f45b-482b-a551-4f11b8c1ff8b | 17 | 18080550  | 18082089  | 6   | 1539  | 1  | 2  | 3  | NA | NA | NA |
| Bladder-TCC   | e6c78a98-f45b-482b-a551-4f11b8c1ff8b | 17 | 45193169  | 45196685  | 12  | 3516  | 1  | 6  | 5  | NA | NA | NA |
| Bladder-TCC   | e6c78a98-f45b-482b-a551-4f11b8c1ff8b | 19 | 20765343  | 20767583  | 9   | 2240  | NA | 7  | 2  | NA | NA | NA |
| Bladder-TCC   | e6c78a98-f45b-482b-a551-4f11b8c1ff8b | 20 | 32149100  | 32152723  | 6   | 3623  | NA | 6  | NA | NA | NA | NA |
| Bladder-TCC   | e6c78a98-f45b-482b-a551-4f11b8c1ff8b | 20 | 62279973  | 62281611  | 8   | 1638  | NA | 7  | 1  | NA | NA | NA |
| Bladder-TCC   | e6c78a98-f45b-482b-a551-4f11b8c1ff8b | 22 | 20797832  | 20803905  | 13  | 6073  | NA | 4  | 9  | NA | NA | NA |
| Panc-AdenoCA  | e6eda5db-4d4f-418e-b0d4-ed9b3e5259d3 | 6  | 66954160  | 66955710  | 7   | 1550  | NA | 5  | 2  | NA | NA | NA |
| Ovary-AdenoCA | e6f7344b-951f-4f3f-b140-7bf53164c462 | 1  | 96312253  | 96316807  | 6   | 4554  | 2  | 3  | 1  | NA | NA | NA |
| Ovary-AdenoCA | e6f7344b-951f-4f3f-b140-7bf53164c462 | 3  | 104940013 | 104944672 | 6   | 4659  | NA | 4  | 2  | NA | NA | NA |
| Ovary-AdenoCA | e6f7344b-951f-4f3f-b140-7bf53164c462 | 8  | 48444836  | 48447626  | 9   | 2790  | 4  | 4  | 1  | NA | NA | NA |
| Ovary-AdenoCA | e6f7344b-951f-4f3f-b140-7bf53164c462 | 10 | 114357875 | 114376148 | 33  | 18273 | NA | 19 | 14 | NA | NA | NA |
| Ovary-AdenoCA | e6f7344b-951f-4f3f-b140-7bf53164c462 | 11 | 105825256 | 105825610 | 10  | 354   | NA | 1  | 9  | NA | NA | NA |
| Ovary-AdenoCA | e6f7344b-951f-4f3f-b140-7bf53164c462 | 12 | 98691669  | 98694695  | 14  | 3026  | NA | 11 | 3  | NA | NA | NA |
| Ovary-AdenoCA | e6f7344b-951f-4f3f-b140-7bf53164c462 | 18 | 20093420  | 20093910  | 6   | 490   | 1  | 3  | 2  | NA | NA | NA |
| Panc-AdenoCA  | e7048a93-a1ed-4cdc-a1ab-fa507408ca77 | 8  | 66113440  | 66113679  | 13  | 239   | 3  | 2  | 8  | NA | NA | NA |
| Panc-AdenoCA  | e7048a93-a1ed-4cdc-a1ab-fa507408ca77 | 9  | 28697591  | 28700902  | 6   | 3311  | NA | 2  | 4  | NA | NA | NA |
| Panc-AdenoCA  | e7048a93-a1ed-4cdc-a1ab-fa507408ca77 | 18 | 21743804  | 21744037  | 6   | 233   | NA | 3  | 3  | NA | NA | NA |
| Panc-AdenoCA  | e7048a93-a1ed-4cdc-a1ab-fa507408ca77 | 18 | 22155717  | 22156967  | 13  | 1250  | 2  | 3  | 8  | NA | NA | NA |
| Liver-HCC     | e75fbf08-c622-11e3-bf01-24c6515278c0 | 4  | 22778483  | 22781527  | 9   | 3044  | NA | 5  | 2  | NA | 2  | NA |
| Liver-HCC     | e75fbf08-c622-11e3-bf01-24c6515278c0 | 20 | 50106928  | 50107711  | 7   | 783   | NA | 2  | 5  | NA | NA | NA |
| Panc-AdenoCA  | e7603fc8-9b73-4c17-86f9-46ca1bceeb1d | 7  | 19738199  | 19739629  | 13  | 1430  | NA | 5  | 8  | NA | NA | NA |
| Panc-AdenoCA  | e7603fc8-9b73-4c17-86f9-46ca1bceeb1d | 9  | 20516934  | 20517535  | 6   | 601   | 1  | 1  | 4  | NA | NA | NA |
| Panc-AdenoCA  | e7603fc8-9b73-4c17-86f9-46ca1bceeb1d | 9  | 20909251  | 20911813  | 20  | 2562  | 1  | 7  | 12 | NA | NA | NA |
| Panc-AdenoCA  | e7603fc8-9b73-4c17-86f9-46ca1bceeb1d | 9  | 21009625  | 21013049  | 15  | 3424  | 1  | 6  | 8  | NA | NA | NA |

|                 |                                      |    |           |           |    |       |    |    |    |    |    |    |
|-----------------|--------------------------------------|----|-----------|-----------|----|-------|----|----|----|----|----|----|
| Eso-AdenoCa     | e7a0889c-dd8c-4230-9c63-384f1f6ee577 | 2  | 160733902 | 160734982 | 6  | 1080  | NA | 4  | 2  | NA | NA | NA |
| Biliary-AdenoCA | e7c90af0-4b03-453e-b44f-e07248415088 | 4  | 114697943 | 114698687 | 6  | 744   | 3  | 1  | 2  | NA | NA | NA |
| Biliary-AdenoCA | e7c90af0-4b03-453e-b44f-e07248415088 | 7  | 54890507  | 54905892  | 34 | 15385 | 2  | 12 | 20 | NA | NA | NA |
| Biliary-AdenoCA | e7c90af0-4b03-453e-b44f-e07248415088 | 10 | 92452406  | 92453290  | 6  | 884   | 1  | 2  | 3  | NA | NA | NA |
| Biliary-AdenoCA | e7c90af0-4b03-453e-b44f-e07248415088 | 11 | 41126983  | 41128399  | 7  | 1416  | NA | 1  | 3  | NA | 2  | 1  |
| Biliary-AdenoCA | e7c90af0-4b03-453e-b44f-e07248415088 | 17 | 37010928  | 37012524  | 12 | 1596  | 2  | 6  | 4  | NA | NA | NA |
| Biliary-AdenoCA | e7c90af0-4b03-453e-b44f-e07248415088 | 19 | 51566711  | 51566952  | 7  | 241   | NA | 3  | 4  | NA | NA | NA |
| Biliary-AdenoCA | e7c90af0-4b03-453e-b44f-e07248415088 | 19 | 56564955  | 56565806  | 9  | 851   | 1  | 5  | 3  | NA | NA | NA |
| Uterus-AdenoCA  | e7d74d34-3255-4c20-90fd-b105e6e229c8 | 1  | 153480595 | 153482899 | 6  | 2304  | 3  | 1  | 2  | NA | NA | NA |
| Uterus-AdenoCA  | e7d74d34-3255-4c20-90fd-b105e6e229c8 | 1  | 201300707 | 201308222 | 22 | 7515  | 6  | 8  | 8  | NA | NA | NA |
| Uterus-AdenoCA  | e7d74d34-3255-4c20-90fd-b105e6e229c8 | 1  | 201720869 | 201725514 | 7  | 4645  | 3  | 1  | 3  | NA | NA | NA |
| Uterus-AdenoCA  | e7d74d34-3255-4c20-90fd-b105e6e229c8 | 3  | 169055726 | 169059328 | 6  | 3602  | NA | 3  | 3  | NA | NA | NA |
| Uterus-AdenoCA  | e7d74d34-3255-4c20-90fd-b105e6e229c8 | 5  | 17278993  | 17305771  | 54 | 26778 | 10 | 4  | 37 | NA | NA | 3  |
| Uterus-AdenoCA  | e7d74d34-3255-4c20-90fd-b105e6e229c8 | 7  | 55702346  | 55705229  | 7  | 2883  | NA | 1  | 6  | NA | NA | NA |
| Lung-SCC        | e7ebc6fb-0926-4c8a-a67b-0c6b9c1ffaba | 1  | 157007338 | 157009562 | 6  | 2224  | NA | NA | 6  | NA | NA | NA |
| Lung-SCC        | e7ebc6fb-0926-4c8a-a67b-0c6b9c1ffaba | 2  | 241189471 | 241194764 | 12 | 5293  | NA | 6  | 6  | NA | NA | NA |
| Lung-SCC        | e7ebc6fb-0926-4c8a-a67b-0c6b9c1ffaba | 3  | 175801773 | 175805046 | 32 | 3273  | NA | 3  | 29 | NA | NA | NA |
| Lung-SCC        | e7ebc6fb-0926-4c8a-a67b-0c6b9c1ffaba | 3  | 177231674 | 177233402 | 8  | 1728  | NA | 3  | 5  | NA | NA | NA |
| Lung-SCC        | e7ebc6fb-0926-4c8a-a67b-0c6b9c1ffaba | 3  | 179537218 | 179538998 | 12 | 1780  | NA | NA | 12 | NA | NA | NA |
| Lung-SCC        | e7ebc6fb-0926-4c8a-a67b-0c6b9c1ffaba | 3  | 189642434 | 189655229 | 17 | 12795 | NA | 8  | 9  | NA | NA | NA |
| Lung-SCC        | e7ebc6fb-0926-4c8a-a67b-0c6b9c1ffaba | 6  | 33604802  | 33606464  | 7  | 1662  | NA | 2  | 5  | NA | NA | NA |
| Lung-SCC        | e7ebc6fb-0926-4c8a-a67b-0c6b9c1ffaba | 6  | 56337156  | 56343289  | 31 | 6133  | 4  | 13 | 14 | NA | NA | NA |
| Lung-SCC        | e7ebc6fb-0926-4c8a-a67b-0c6b9c1ffaba | 7  | 2616002   | 2616777   | 6  | 775   | NA | 2  | 4  | NA | NA | NA |
| Lung-SCC        | e7ebc6fb-0926-4c8a-a67b-0c6b9c1ffaba | 8  | 102058019 | 102062159 | 9  | 4140  | NA | 1  | 8  | NA | NA | NA |
| Lung-SCC        | e7ebc6fb-0926-4c8a-a67b-0c6b9c1ffaba | 9  | 774910    | 775762    | 7  | 852   | NA | 2  | 5  | NA | NA | NA |
| Lung-SCC        | e7ebc6fb-0926-4c8a-a67b-0c6b9c1ffaba | 9  | 35757500  | 35760150  | 7  | 2650  | 2  | 4  | 1  | NA | NA | NA |
| Lung-SCC        | e7ebc6fb-0926-4c8a-a67b-0c6b9c1ffaba | 9  | 36685404  | 36700130  | 18 | 14726 | 2  | 6  | 10 | NA | NA | NA |
| Lung-SCC        | e7ebc6fb-0926-4c8a-a67b-0c6b9c1ffaba | 10 | 77887483  | 77888012  | 6  | 529   | 1  | 3  | 2  | NA | NA | NA |
| Lung-SCC        | e7ebc6fb-0926-4c8a-a67b-0c6b9c1ffaba | 11 | 124218513 | 124231169 | 29 | 12656 | NA | 15 | 14 | NA | NA | NA |
| Lung-SCC        | e7ebc6fb-0926-4c8a-a67b-0c6b9c1ffaba | 11 | 125259128 | 125260724 | 14 | 1596  | 4  | 7  | 3  | NA | NA | NA |
| Lung-SCC        | e7ebc6fb-0926-4c8a-a67b-0c6b9c1ffaba | 12 | 123512249 | 123512954 | 6  | 705   | 2  | 1  | 3  | NA | NA | NA |
| Lung-SCC        | e7ebc6fb-0926-4c8a-a67b-0c6b9c1ffaba | 13 | 25463867  | 25466876  | 6  | 3009  | NA | 5  | 1  | NA | NA | NA |
| Lung-SCC        | e7ebc6fb-0926-4c8a-a67b-0c6b9c1ffaba | 13 | 48554045  | 48555210  | 8  | 1165  | 1  | 3  | 4  | NA | NA | NA |
| Lung-SCC        | e7ebc6fb-0926-4c8a-a67b-0c6b9c1ffaba | 15 | 31861766  | 31863148  | 6  | 1382  | NA | 3  | 3  | NA | NA | NA |
| Lung-SCC        | e7ebc6fb-0926-4c8a-a67b-0c6b9c1ffaba | 16 | 8962896   | 8965924   | 7  | 3028  | 2  | 1  | 4  | NA | NA | NA |
| Lung-SCC        | e7ebc6fb-0926-4c8a-a67b-0c6b9c1ffaba | 16 | 30935746  | 30937306  | 10 | 1560  | 1  | 5  | 4  | NA | NA | NA |
| Lung-SCC        | e7ebc6fb-0926-4c8a-a67b-0c6b9c1ffaba | 17 | 71107062  | 71108510  | 6  | 1448  | 3  | NA | 3  | NA | NA | NA |
| Lung-SCC        | e7ebc6fb-0926-4c8a-a67b-0c6b9c1ffaba | 19 | 16820237  | 16824957  | 11 | 4720  | 1  | 3  | 7  | NA | NA | NA |
| Lung-SCC        | e7ebc6fb-0926-4c8a-a67b-0c6b9c1ffaba | 20 | 47834479  | 47836128  | 6  | 1649  | 2  | 1  | 3  | NA | NA | NA |
| Breast-AdenoCa  | e8392f20-c9e3-4649-b64f-5b266c393a76 | 11 | 93274690  | 93280525  | 20 | 5835  | 2  | 10 | 7  | 1  | NA | NA |
| Lymph-BNHL      | e84e0649-a2e8-4873-9cb6-1aa65601ae3a | 1  | 82007298  | 82014471  | 9  | 7173  | 3  | NA | 1  | 4  | NA | 1  |
| Lymph-BNHL      | e84e0649-a2e8-4873-9cb6-1aa65601ae3a | 1  | 106270366 | 106275602 | 12 | 5236  | 1  | NA | 2  | 3  | 2  | 4  |
| Lymph-BNHL      | e84e0649-a2e8-4873-9cb6-1aa65601ae3a | 1  | 248088813 | 248091888 | 7  | 3075  | 2  | NA | 2  | 1  | NA | 2  |
| Lymph-BNHL      | e84e0649-a2e8-4873-9cb6-1aa65601ae3a | 4  | 23029754  | 23030441  | 7  | 687   | NA | NA | 1  | 3  | 1  | 2  |
| Lymph-BNHL      | e84e0649-a2e8-4873-9cb6-1aa65601ae3a | 4  | 58974876  | 58981567  | 8  | 6691  | NA | 1  | 2  | 1  | 2  | 2  |
| Lymph-BNHL      | e84e0649-a2e8-4873-9cb6-1aa65601ae3a | 4  | 64169582  | 64170842  | 7  | 1260  | 2  | NA | NA | 1  | 1  | 3  |
| Lymph-BNHL      | e84e0649-a2e8-4873-9cb6-1aa65601ae3a | 4  | 96854051  | 96866570  | 17 | 12519 | 1  | 3  | 3  | 3  | 1  | 6  |
| Lymph-BNHL      | e84e0649-a2e8-4873-9cb6-1aa65601ae3a | 4  | 127371754 | 127378740 | 12 | 6986  | 3  | 1  | 2  | 2  | NA | 4  |
| Lymph-BNHL      | e84e0649-a2e8-4873-9cb6-1aa65601ae3a | 4  | 143065875 | 143076046 | 15 | 10171 | NA | NA | 4  | 4  | 1  | 6  |
| Lymph-BNHL      | e84e0649-a2e8-4873-9cb6-1aa65601ae3a | 4  | 173037103 | 173040783 | 7  | 3680  | 1  | 1  | 1  | NA | 2  | 2  |
| Lymph-BNHL      | e84e0649-a2e8-4873-9cb6-1aa65601ae3a | 5  | 21400750  | 21405095  | 9  | 4345  | 2  | 1  | 1  | 3  | NA | 2  |
| Lymph-BNHL      | e84e0649-a2e8-4873-9cb6-1aa65601ae3a | 5  | 23455449  | 23461035  | 7  | 5586  | NA | NA | 1  | 2  | 1  | 3  |
| Lymph-BNHL      | e84e0649-a2e8-4873-9cb6-1aa65601ae3a | 6  | 391851    | 398809    | 81 | 6958  | 7  | 29 | 23 | 10 | 8  | 4  |
| Lymph-BNHL      | e84e0649-a2e8-4873-9cb6-1aa65601ae3a | 6  | 49255411  | 49261263  | 8  | 5852  | 1  | NA | 2  | 2  | NA | 3  |
| Lymph-BNHL      | e84e0649-a2e8-4873-9cb6-1aa65601ae3a | 6  | 102864572 | 102873001 | 13 | 8429  | 1  | 4  | NA | 1  | 2  | 5  |
| Lymph-BNHL      | e84e0649-a2e8-4873-9cb6-1aa65601ae3a | 7  | 88729895  | 88731537  | 6  | 1642  | NA | NA | NA | NA | 4  | 2  |
| Lymph-BNHL      | e84e0649-a2e8-4873-9cb6-1aa65601ae3a | 8  | 84739972  | 84743402  | 6  | 3430  | 2  | NA | NA | 2  | 1  | 1  |
| Lymph-BNHL      | e84e0649-a2e8-4873-9cb6-1aa65601ae3a | 11 | 79259979  | 79261777  | 6  | 1798  | NA | NA | NA | 1  | NA | 5  |
| Lymph-BNHL      | e84e0649-a2e8-4873-9cb6-1aa65601ae3a | 11 | 89234086  | 89236328  | 7  | 2242  | 1  | NA | NA | 5  | NA | 1  |
| Lymph-BNHL      | e84e0649-a2e8-4873-9cb6-1aa65601ae3a | 13 | 65864841  | 65868941  | 6  | 4100  | 2  | NA | 1  | 1  | 1  | 1  |

|              |                                      |    |           |           |    |       |    |    |    |    |    |    |
|--------------|--------------------------------------|----|-----------|-----------|----|-------|----|----|----|----|----|----|
| Lymph-BNHL   | e84e0649-a2e8-4873-9cb6-1aa65601ae3a | 13 | 67446441  | 67448583  | 7  | 2142  | 2  | NA | 1  | NA | 2  | 2  |
| Lymph-BNHL   | e84e0649-a2e8-4873-9cb6-1aa65601ae3a | 13 | 85640138  | 85645780  | 7  | 5642  | 3  | NA | 1  | 1  | 2  | NA |
| Lymph-BNHL   | e84e0649-a2e8-4873-9cb6-1aa65601ae3a | 13 | 89576150  | 89582983  | 11 | 6833  | 1  | 1  | NA | 2  | 4  | 3  |
| Lymph-BNHL   | e84e0649-a2e8-4873-9cb6-1aa65601ae3a | 14 | 43099774  | 43103340  | 6  | 3566  | 2  | NA | NA | 1  | 1  | 2  |
| Lymph-BNHL   | e84e0649-a2e8-4873-9cb6-1aa65601ae3a | 14 | 106068880 | 106072009 | 24 | 3129  | 4  | 6  | 7  | 2  | 3  | 2  |
| Lymph-BNHL   | e84e0649-a2e8-4873-9cb6-1aa65601ae3a | 14 | 106112882 | 106137538 | 26 | 24656 | 3  | 7  | 9  | 4  | 1  | 2  |
| Lymph-BNHL   | e84e0649-a2e8-4873-9cb6-1aa65601ae3a | 14 | 106173741 | 106176911 | 30 | 3170  | 3  | 5  | 6  | 7  | 4  | 5  |
| Lymph-BNHL   | e84e0649-a2e8-4873-9cb6-1aa65601ae3a | 14 | 106358187 | 106367498 | 18 | 9311  | NA | 3  | 5  | 4  | 5  | 1  |
| Lymph-BNHL   | e84e0649-a2e8-4873-9cb6-1aa65601ae3a | 14 | 106641827 | 106642769 | 31 | 942   | 3  | 5  | 4  | 5  | 6  | 8  |
| Lymph-BNHL   | e84e0649-a2e8-4873-9cb6-1aa65601ae3a | 14 | 107178916 | 107179052 | 7  | 136   | 1  | 1  | 4  | NA | 1  | NA |
| Lymph-BNHL   | e84e0649-a2e8-4873-9cb6-1aa65601ae3a | 17 | 36042994  | 36043107  | 6  | 113   | NA | NA | NA | 1  | 2  | 3  |
| Lymph-BNHL   | e84e0649-a2e8-4873-9cb6-1aa65601ae3a | 20 | 12478955  | 12481700  | 6  | 2745  | NA | NA | 3  | NA | 1  | 2  |
| Lymph-BNHL   | e84e0649-a2e8-4873-9cb6-1aa65601ae3a | 22 | 23198076  | 23265021  | 90 | 66945 | 13 | 16 | 35 | 6  | 6  | 14 |
| Lymph-BNHL   | e84e0649-a2e8-4873-9cb6-1aa65601ae3a | X  | 28488571  | 28490989  | 6  | 2418  | 2  | NA | 1  | NA | NA | 3  |
| Lymph-BNHL   | e84e0649-a2e8-4873-9cb6-1aa65601ae3a | X  | 82163571  | 82164959  | 7  | 1388  | 1  | NA | 1  | 1  | 1  | 3  |
| Lymph-BNHL   | e84e0649-a2e8-4873-9cb6-1aa65601ae3a | X  | 86377490  | 86386243  | 16 | 8753  | 3  | NA | 1  | 3  | 2  | 7  |
| Lymph-BNHL   | e84e0649-a2e8-4873-9cb6-1aa65601ae3a | X  | 86740083  | 86745202  | 9  | 5119  | 2  | 2  | NA | 1  | 3  | 1  |
| Lymph-BNHL   | e84e0649-a2e8-4873-9cb6-1aa65601ae3a | X  | 87906423  | 87913774  | 9  | 7351  | 1  | 2  | 1  | 1  | 1  | 3  |
| Lymph-BNHL   | e84e0649-a2e8-4873-9cb6-1aa65601ae3a | X  | 87988342  | 87994316  | 8  | 5974  | 2  | NA | 1  | 1  | 1  | 3  |
| Lymph-BNHL   | e84e0649-a2e8-4873-9cb6-1aa65601ae3a | X  | 88011957  | 88016754  | 8  | 4797  | 4  | NA | 2  | NA | NA | 2  |
| Lymph-BNHL   | e84e0649-a2e8-4873-9cb6-1aa65601ae3a | X  | 94944652  | 94949158  | 7  | 4506  | 1  | 3  | NA | 2  | NA | 1  |
| Lymph-BNHL   | e89e9c69-ffcd-4a4c-818d-1dee43ddc76a | 2  | 89156354  | 89161381  | 59 | 5027  | 3  | 7  | 30 | 11 | 5  | 3  |
| Lymph-BNHL   | e89e9c69-ffcd-4a4c-818d-1dee43ddc76a | 2  | 89246834  | 89247574  | 8  | 740   | 1  | 1  | 4  | 2  | NA | NA |
| Lymph-BNHL   | e89e9c69-ffcd-4a4c-818d-1dee43ddc76a | 9  | 37025236  | 37027190  | 13 | 1954  | NA | 4  | 9  | NA | NA | NA |
| Lymph-BNHL   | e89e9c69-ffcd-4a4c-818d-1dee43ddc76a | 14 | 106240221 | 106241546 | 29 | 1325  | 2  | 1  | 26 | NA | NA | NA |
| Lymph-BNHL   | e89e9c69-ffcd-4a4c-818d-1dee43ddc76a | 14 | 106321869 | 106389316 | 83 | 67447 | 6  | 8  | 64 | 4  | 1  | NA |
| Lymph-BNHL   | e89e9c69-ffcd-4a4c-818d-1dee43ddc76a | 14 | 106518459 | 106518792 | 10 | 333   | NA | 1  | 8  | NA | 1  | NA |
| Lymph-BNHL   | e89e9c69-ffcd-4a4c-818d-1dee43ddc76a | 16 | 19554812  | 19558789  | 15 | 3977  | NA | 9  | 4  | NA | 1  | 1  |
| Lymph-BNHL   | e89e9c69-ffcd-4a4c-818d-1dee43ddc76a | 16 | 30566887  | 30570221  | 8  | 3334  | 1  | 1  | 2  | 3  | NA | 1  |
| Lymph-BNHL   | e89e9c69-ffcd-4a4c-818d-1dee43ddc76a | 22 | 23230463  | 23236231  | 30 | 5768  | 2  | 4  | 20 | 3  | 1  | NA |
| Kidney-ChRCC | e9032df3-8692-4146-a867-b9b64c9b310a | 3  | 28206436  | 28207497  | 11 | 1061  | 4  | NA | 7  | NA | NA | NA |
| Kidney-ChRCC | e9032df3-8692-4146-a867-b9b64c9b310a | 3  | 29181860  | 29185502  | 13 | 3642  | NA | 4  | 9  | NA | NA | NA |
| Kidney-ChRCC | e9032df3-8692-4146-a867-b9b64c9b310a | 3  | 29993713  | 29995075  | 11 | 1362  | 1  | 2  | 8  | NA | NA | NA |
| Kidney-ChRCC | e9032df3-8692-4146-a867-b9b64c9b310a | 3  | 30121291  | 30121796  | 7  | 505   | NA | 2  | 5  | NA | NA | NA |
| Kidney-ChRCC | e9032df3-8692-4146-a867-b9b64c9b310a | 3  | 30697074  | 30698798  | 11 | 1724  | 1  | 2  | 8  | NA | NA | NA |
| Kidney-ChRCC | e9032df3-8692-4146-a867-b9b64c9b310a | 3  | 30865059  | 30875422  | 53 | 10363 | 2  | 16 | 35 | NA | NA | NA |
| Kidney-ChRCC | e9032df3-8692-4146-a867-b9b64c9b310a | 3  | 32131442  | 32136470  | 15 | 5028  | NA | 2  | 13 | NA | NA | NA |
| Kidney-ChRCC | e9032df3-8692-4146-a867-b9b64c9b310a | 3  | 47990583  | 47994846  | 8  | 4263  | NA | 2  | 6  | NA | NA | NA |
| Kidney-ChRCC | e9032df3-8692-4146-a867-b9b64c9b310a | 8  | 50987912  | 50988477  | 11 | 565   | NA | 5  | 6  | NA | NA | NA |
| Kidney-ChRCC | e9032df3-8692-4146-a867-b9b64c9b310a | 8  | 70154323  | 70161867  | 24 | 7544  | 1  | 7  | 16 | NA | NA | NA |
| Kidney-ChRCC | e9032df3-8692-4146-a867-b9b64c9b310a | 8  | 102950772 | 102951228 | 9  | 456   | 1  | 3  | 5  | NA | NA | NA |
| Kidney-ChRCC | e9032df3-8692-4146-a867-b9b64c9b310a | 8  | 105510296 | 105512480 | 10 | 2184  | NA | 4  | 6  | NA | NA | NA |
| Kidney-ChRCC | e9032df3-8692-4146-a867-b9b64c9b310a | 12 | 27259716  | 27266028  | 15 | 6312  | NA | NA | 15 | NA | NA | NA |
| Kidney-ChRCC | e9032df3-8692-4146-a867-b9b64c9b310a | 15 | 43495595  | 43497091  | 10 | 1496  | NA | 1  | 9  | NA | NA | NA |
| Kidney-ChRCC | e9032df3-8692-4146-a867-b9b64c9b310a | 15 | 49178004  | 49183790  | 7  | 5786  | NA | NA | 7  | NA | NA | NA |
| Kidney-ChRCC | e9032df3-8692-4146-a867-b9b64c9b310a | 15 | 55068113  | 55068456  | 7  | 343   | NA | 4  | 3  | NA | NA | NA |
| Kidney-ChRCC | e9032df3-8692-4146-a867-b9b64c9b310a | 15 | 55122413  | 55125268  | 8  | 2855  | NA | NA | 8  | NA | NA | NA |
| Kidney-ChRCC | e9032df3-8692-4146-a867-b9b64c9b310a | 15 | 56639233  | 56639440  | 7  | 207   | NA | NA | 7  | NA | NA | NA |
| Kidney-ChRCC | e9032df3-8692-4146-a867-b9b64c9b310a | 15 | 66532915  | 66533522  | 10 | 607   | NA | 2  | 8  | NA | NA | NA |
| Kidney-ChRCC | e9032df3-8692-4146-a867-b9b64c9b310a | 15 | 95527438  | 95530480  | 20 | 3042  | 1  | 11 | 8  | NA | NA | NA |
| Eso-AdenoCa  | e93b0979-65ef-4883-9b6e-39eb17966e66 | 2  | 31675481  | 31678717  | 8  | 3236  | 3  | 3  | 2  | NA | NA | NA |
| Eso-AdenoCa  | e93b0979-65ef-4883-9b6e-39eb17966e66 | 8  | 127422442 | 127423933 | 7  | 1491  | 2  | 3  | 2  | NA | NA | NA |
| Panc-AdenoCA | e97ea3d7-9fcd-4df1-9ea8-587cb3be75ec | 9  | 21927618  | 21928036  | 6  | 418   | NA | 4  | 2  | NA | NA | NA |
| Panc-AdenoCA | e97ea3d7-9fcd-4df1-9ea8-587cb3be75ec | 10 | 86758533  | 86761163  | 17 | 2630  | 1  | 13 | 3  | NA | NA | NA |
| Lymph-BNHL   | e98e4e23-a139-4fff-b017-35f3f976eddd | 2  | 89160666  | 89161299  | 12 | 633   | NA | NA | 3  | 6  | 1  | 2  |
| Lymph-BNHL   | e98e4e23-a139-4fff-b017-35f3f976eddd | 4  | 181846842 | 181851186 | 9  | 4344  | NA | NA | 1  | 7  | NA | 1  |
| Lymph-BNHL   | e98e4e23-a139-4fff-b017-35f3f976eddd | 5  | 99887494  | 99890026  | 7  | 2532  | NA | 1  | NA | 5  | 1  | NA |
| Lymph-BNHL   | e98e4e23-a139-4fff-b017-35f3f976eddd | 7  | 81154638  | 81160378  | 7  | 5740  | 1  | NA | 2  | 3  | NA | 1  |
| Lymph-BNHL   | e98e4e23-a139-4fff-b017-35f3f976eddd | 13 | 64112729  | 64119943  | 9  | 7214  | NA | NA | 1  | 5  | 1  | 2  |
| Lymph-BNHL   | e98e4e23-a139-4fff-b017-35f3f976eddd | 14 | 106208869 | 106214726 | 15 | 5857  | 1  | 1  | 10 | 2  | 1  | NA |

|                 |                                      |    |           |           |     |       |    |    |    |    |    |    |
|-----------------|--------------------------------------|----|-----------|-----------|-----|-------|----|----|----|----|----|----|
| Lymph-BNHL      | e98e4e23-a139-4fff-b017-35f3f976eddd | 14 | 106326543 | 106330267 | 57  | 3724  | 2  | 13 | 19 | 13 | 4  | 6  |
| Lymph-BNHL      | e98e4e23-a139-4fff-b017-35f3f976eddd | 14 | 106518678 | 106519610 | 9   | 932   | 1  | 1  | 5  | NA | NA | 2  |
| Lymph-BNHL      | e98e4e23-a139-4fff-b017-35f3f976eddd | 18 | 60984962  | 60988779  | 15  | 3817  | NA | 4  | 3  | 2  | 4  | 2  |
| Lymph-BNHL      | e98e4e23-a139-4fff-b017-35f3f976eddd | 22 | 23192289  | 23192792  | 9   | 503   | NA | 4  | 1  | 2  | 1  | 1  |
| Lymph-BNHL      | e98e4e23-a139-4fff-b017-35f3f976eddd | 22 | 23230583  | 23231848  | 11  | 1265  | NA | 1  | 4  | 4  | NA | 2  |
| Ovary-AdenoCA   | e9d98643-01ee-40c3-a617-e004559625cd | 12 | 70133917  | 70134999  | 6   | 1082  | 1  | 3  | 2  | NA | NA | NA |
| Ovary-AdenoCA   | e9d98643-01ee-40c3-a617-e004559625cd | 18 | 4613979   | 4615636   | 13  | 1657  | 1  | 7  | 5  | NA | NA | NA |
| Stomach-AdenoCA | ea2055d1-7b8b-4aaf-9a70-8802f4deef9b | 21 | 20430349  | 20431046  | 7   | 697   | 4  | NA | 3  | NA | NA | NA |
| Breast-AdenoCa  | ea43434b-197e-48ac-ae2e-46bc7f3776de | 8  | 43297017  | 43299202  | 8   | 2185  | 2  | 3  | 3  | NA | NA | NA |
| Breast-AdenoCa  | ea43434b-197e-48ac-ae2e-46bc7f3776de | 8  | 124694612 | 124695949 | 7   | 1337  | 2  | 2  | 3  | NA | NA | NA |
| Uterus-AdenoCA  | ea6efcd1-11de-45f0-8bde-f1c06ad27e79 | 5  | 10247487  | 10247754  | 6   | 267   | 1  | 1  | 4  | NA | NA | NA |
| Uterus-AdenoCA  | ea6efcd1-11de-45f0-8bde-f1c06ad27e79 | 7  | 94548806  | 94552795  | 8   | 3989  | 2  | 5  | 1  | NA | NA | NA |
| Uterus-AdenoCA  | ea6efcd1-11de-45f0-8bde-f1c06ad27e79 | 8  | 43493284  | 43497749  | 12  | 4465  | 2  | 7  | NA | 3  | NA | NA |
| Uterus-AdenoCA  | ea6efcd1-11de-45f0-8bde-f1c06ad27e79 | 9  | 3606219   | 3607105   | 9   | 886   | 2  | 5  | 2  | NA | NA | NA |
| Uterus-AdenoCA  | ea6efcd1-11de-45f0-8bde-f1c06ad27e79 | 15 | 47782302  | 47783113  | 7   | 811   | 2  | 2  | 3  | NA | NA | NA |
| Uterus-AdenoCA  | ea6efcd1-11de-45f0-8bde-f1c06ad27e79 | 15 | 47799142  | 47801050  | 8   | 1908  | NA | 4  | 4  | NA | NA | NA |
| CNS-GBM         | ea71331-53d3-4cf5-96c9-5121a3962c27  | X  | 148801613 | 148803789 | 9   | 2176  | 2  | 5  | 2  | NA | NA | NA |
| CNS-GBM         | ea71331-53d3-4cf5-96c9-5121a3962c27  | X  | 148978519 | 148981726 | 8   | 3207  | 6  | NA | 2  | NA | NA | NA |
| Skin-Melanoma   | ead1bc2e-42c3-46d9-8f6f-8cb16ba9d2c3 | 3  | 26692009  | 26696090  | 17  | 4081  | NA | 4  | 13 | NA | NA | NA |
| Skin-Melanoma   | ead1bc2e-42c3-46d9-8f6f-8cb16ba9d2c3 | 5  | 15057302  | 15064251  | 9   | 6949  | 1  | 5  | 1  | NA | 1  | 1  |
| Skin-Melanoma   | ead1bc2e-42c3-46d9-8f6f-8cb16ba9d2c3 | 5  | 17843354  | 17844846  | 21  | 1492  | 1  | 3  | 17 | NA | NA | NA |
| Skin-Melanoma   | ead1bc2e-42c3-46d9-8f6f-8cb16ba9d2c3 | 5  | 37308115  | 37309735  | 8   | 1620  | 1  | NA | 7  | NA | NA | NA |
| Skin-Melanoma   | ead1bc2e-42c3-46d9-8f6f-8cb16ba9d2c3 | 7  | 125734166 | 125738797 | 20  | 4631  | 5  | 2  | 13 | NA | NA | NA |
| Skin-Melanoma   | ead1bc2e-42c3-46d9-8f6f-8cb16ba9d2c3 | 7  | 149508540 | 149510134 | 10  | 1594  | 2  | 1  | 7  | NA | NA | NA |
| Skin-Melanoma   | ead1bc2e-42c3-46d9-8f6f-8cb16ba9d2c3 | 11 | 59767868  | 59768338  | 6   | 470   | 1  | 1  | 4  | NA | NA | NA |
| Skin-Melanoma   | ead1bc2e-42c3-46d9-8f6f-8cb16ba9d2c3 | 11 | 81236149  | 81236640  | 8   | 491   | NA | NA | 8  | NA | NA | NA |
| Skin-Melanoma   | ead1bc2e-42c3-46d9-8f6f-8cb16ba9d2c3 | 14 | 91353033  | 91353589  | 6   | 556   | NA | 1  | 5  | NA | NA | NA |
| Eso-AdenoCa     | eb1531b0-8af1-4b2b-9192-644cb47101fc | 7  | 54664721  | 54670197  | 9   | 5476  | 2  | 1  | 6  | NA | NA | NA |
| Eso-AdenoCa     | eb1531b0-8af1-4b2b-9192-644cb47101fc | 9  | 127611107 | 127614492 | 6   | 3385  | NA | 3  | 3  | NA | NA | NA |
| Eso-AdenoCa     | eb1531b0-8af1-4b2b-9192-644cb47101fc | 10 | 68161583  | 68164404  | 8   | 2821  | 2  | NA | NA | 4  | 2  | NA |
| Eso-AdenoCa     | eb1531b0-8af1-4b2b-9192-644cb47101fc | 11 | 118357419 | 118357813 | 7   | 394   | 1  | NA | 6  | NA | NA | NA |
| Eso-AdenoCa     | eb1531b0-8af1-4b2b-9192-644cb47101fc | 17 | 75357536  | 75361200  | 7   | 3664  | 1  | 1  | 4  | 1  | NA | NA |
| Liver-HCC       | eb1792ee-6946-4e0d-bdd1-c924328dba5d | 1  | 111020321 | 111020676 | 6   | 355   | 2  | 3  | 1  | NA | NA | NA |
| Liver-HCC       | eb1792ee-6946-4e0d-bdd1-c924328dba5d | 8  | 47539451  | 47541045  | 7   | 1594  | NA | NA | 2  | NA | 4  | 1  |
| Stomach-AdenoCA | eb18e71d-2a27-4eae-aa27-4b2c0716d2ba | 2  | 186446057 | 186449053 | 13  | 2996  | 2  | 6  | 5  | NA | NA | NA |
| Stomach-AdenoCA | eb59b79f-bd36-4bf4-83e3-2af73bd1d30a | 1  | 26791328  | 26792907  | 6   | 1579  | NA | 4  | 2  | NA | NA | NA |
| Stomach-AdenoCA | eb59b79f-bd36-4bf4-83e3-2af73bd1d30a | 17 | 37841283  | 37843579  | 7   | 2296  | 2  | 4  | 1  | NA | NA | NA |
| Skin-Melanoma   | eb9a8f12-6451-43cc-95b3-2e86cf704c96 | 1  | 149923924 | 149926457 | 6   | 2533  | 1  | 5  | NA | NA | NA | NA |
| Skin-Melanoma   | eb9a8f12-6451-43cc-95b3-2e86cf704c96 | 2  | 122542471 | 122548444 | 15  | 5973  | 2  | 6  | 6  | NA | NA | 1  |
| Skin-Melanoma   | eb9a8f12-6451-43cc-95b3-2e86cf704c96 | 2  | 122706615 | 122712593 | 20  | 5978  | 2  | 11 | 7  | NA | NA | NA |
| Skin-Melanoma   | eb9a8f12-6451-43cc-95b3-2e86cf704c96 | 2  | 122748494 | 122750787 | 8   | 2293  | NA | 5  | 3  | NA | NA | NA |
| Skin-Melanoma   | eb9a8f12-6451-43cc-95b3-2e86cf704c96 | 3  | 18217041  | 18217517  | 10  | 476   | NA | 2  | 8  | NA | NA | NA |
| Skin-Melanoma   | eb9a8f12-6451-43cc-95b3-2e86cf704c96 | 4  | 173063751 | 173068212 | 9   | 4461  | NA | 1  | 8  | NA | NA | NA |
| Lymph-CLL       | ebc1a26b-9582-4756-acd5-b02d1152319d | 2  | 89159924  | 89185561  | 46  | 25637 | 2  | 11 | 7  | 12 | 9  | 5  |
| Lymph-CLL       | ebc1a26b-9582-4756-acd5-b02d1152319d | 5  | 27140248  | 27144288  | 6   | 4040  | NA | 1  | 1  | NA | 3  | 1  |
| Lymph-CLL       | ebc1a26b-9582-4756-acd5-b02d1152319d | 14 | 106325473 | 106330138 | 20  | 4665  | 1  | 8  | 6  | 4  | 1  | NA |
| Lymph-CLL       | ebc1a26b-9582-4756-acd5-b02d1152319d | 14 | 106452863 | 106454271 | 7   | 1408  | NA | NA | 3  | 2  | 2  | NA |
| Lymph-CLL       | ebc1a26b-9582-4756-acd5-b02d1152319d | 22 | 23223211  | 23227946  | 7   | 4735  | 1  | NA | 2  | 4  | NA | NA |
| Lymph-BNHL      | ebe0ed67-2d3f-45cd-8f9b-4912595b16a0 | 1  | 12442645  | 12442744  | 6   | 99    | NA | NA | NA | 3  | 2  | 1  |
| Lymph-BNHL      | ebe0ed67-2d3f-45cd-8f9b-4912595b16a0 | 2  | 82567704  | 82569071  | 6   | 1367  | NA | NA | 2  | NA | 1  | 3  |
| Lymph-BNHL      | ebe0ed67-2d3f-45cd-8f9b-4912595b16a0 | 2  | 89156697  | 89159429  | 12  | 2732  | NA | 1  | 1  | 3  | 1  | 6  |
| Lymph-BNHL      | ebe0ed67-2d3f-45cd-8f9b-4912595b16a0 | 3  | 187461318 | 187464138 | 26  | 2820  | 2  | 5  | 6  | 7  | 1  | 5  |
| Lymph-BNHL      | ebe0ed67-2d3f-45cd-8f9b-4912595b16a0 | 4  | 161383537 | 161386979 | 6   | 3442  | NA | NA | 1  | NA | 2  | 3  |
| Lymph-BNHL      | ebe0ed67-2d3f-45cd-8f9b-4912595b16a0 | 6  | 103492515 | 103496355 | 8   | 3840  | 2  | NA | 1  | 4  | NA | 1  |
| Lymph-BNHL      | ebe0ed67-2d3f-45cd-8f9b-4912595b16a0 | 8  | 103243232 | 103243560 | 6   | 328   | NA | NA | NA | 3  | 1  | 2  |
| Lymph-BNHL      | ebe0ed67-2d3f-45cd-8f9b-4912595b16a0 | 14 | 69256875  | 69259383  | 7   | 2508  | 1  | 1  | 3  | NA | 1  | 1  |
| Lymph-BNHL      | ebe0ed67-2d3f-45cd-8f9b-4912595b16a0 | 14 | 106176452 | 106178061 | 10  | 1609  | NA | 5  | 3  | 1  | 1  | NA |
| Lymph-BNHL      | ebe0ed67-2d3f-45cd-8f9b-4912595b16a0 | 14 | 106211933 | 106213914 | 11  | 1981  | NA | 3  | 6  | 1  | 1  | NA |
| Lymph-BNHL      | ebe0ed67-2d3f-45cd-8f9b-4912595b16a0 | 14 | 106323783 | 106330231 | 112 | 6448  | 8  | 29 | 37 | 17 | 11 | 10 |
| Lymph-BNHL      | ebe0ed67-2d3f-45cd-8f9b-4912595b16a0 | 14 | 106725391 | 106726055 | 12  | 664   | NA | 2  | NA | 3  | 4  | 3  |

|                 |                                      |    |           |           |    |       |    |    |    |    |    |    |
|-----------------|--------------------------------------|----|-----------|-----------|----|-------|----|----|----|----|----|----|
| Lymph-BNHL      | ebe0ed67-2d3f-45cd-8f9b-4912595b16a0 | 18 | 60984920  | 60988825  | 25 | 3905  | 1  | 3  | 10 | 3  | 6  | 2  |
| Lymph-BNHL      | ebe0ed67-2d3f-45cd-8f9b-4912595b16a0 | 22 | 23229556  | 23231171  | 7  | 1615  | NA | NA | 7  | NA | NA | NA |
| Prost-AdenoCA   | ec16d1f5-f8a9-4c19-8cce-92f6ea9eb3f7 | 13 | 62777788  | 62778164  | 7  | 376   | NA | 1  | 6  | NA | NA | NA |
| Prost-AdenoCA   | ec16d1f5-f8a9-4c19-8cce-92f6ea9eb3f7 | 18 | 33528954  | 33533129  | 21 | 4175  | NA | 15 | 5  | NA | NA | 1  |
| Biliary-AdenoCA | ec399861-7a56-4ffd-8619-700b6e3a4367 | 1  | 15188852  | 15192832  | 6  | 3980  | NA | 1  | 5  | NA | NA | NA |
| Biliary-AdenoCA | ec399861-7a56-4ffd-8619-700b6e3a4367 | 1  | 115761856 | 115762831 | 7  | 975   | NA | 4  | 3  | NA | NA | NA |
| Biliary-AdenoCA | ec399861-7a56-4ffd-8619-700b6e3a4367 | 2  | 210372844 | 210376393 | 7  | 3549  | NA | 5  | 2  | NA | NA | NA |
| Biliary-AdenoCA | ec399861-7a56-4ffd-8619-700b6e3a4367 | 2  | 241099216 | 241100664 | 9  | 1448  | NA | 8  | 1  | NA | NA | NA |
| Biliary-AdenoCA | ec399861-7a56-4ffd-8619-700b6e3a4367 | 5  | 142286556 | 142292431 | 7  | 5875  | NA | 1  | 6  | NA | NA | NA |
| Biliary-AdenoCA | ec399861-7a56-4ffd-8619-700b6e3a4367 | 12 | 21303203  | 21305943  | 6  | 2740  | 2  | 1  | 3  | NA | NA | NA |
| Biliary-AdenoCA | ec399861-7a56-4ffd-8619-700b6e3a4367 | 14 | 30932727  | 30937135  | 8  | 4408  | NA | 5  | 3  | NA | NA | NA |
| Biliary-AdenoCA | ec399861-7a56-4ffd-8619-700b6e3a4367 | 14 | 31265115  | 31265370  | 9  | 255   | NA | 5  | 3  | NA | NA | 1  |
| Biliary-AdenoCA | ec399861-7a56-4ffd-8619-700b6e3a4367 | 14 | 36925572  | 36927921  | 7  | 2349  | 3  | NA | 4  | NA | NA | NA |
| Biliary-AdenoCA | ec399861-7a56-4ffd-8619-700b6e3a4367 | 19 | 41652781  | 41655014  | 9  | 2233  | NA | 2  | 7  | NA | NA | NA |
| Biliary-AdenoCA | ec399861-7a56-4ffd-8619-700b6e3a4367 | 20 | 3239675   | 3243780   | 7  | 4105  | 2  | 4  | 1  | NA | NA | NA |
| Eso-AdenoCa     | ec474dfa-527c-44f3-9224-bf1c858cabfc | 2  | 144920490 | 144925023 | 7  | 4533  | NA | NA | NA | 1  | 6  | NA |
| Eso-AdenoCa     | ec474dfa-527c-44f3-9224-bf1c858cabfc | 10 | 57881095  | 57885104  | 6  | 4009  | NA | NA | NA | 2  | 2  | 2  |
| Liver-HCC       | ec5e2990-c622-11e3-bf01-24c6515278c0 | 17 | 20025956  | 20032993  | 12 | 7037  | 5  | 5  | 1  | 1  | NA | NA |
| Panc-AdenoCA    | ec77847e-48fd-4ba5-bc3e-3cd1b149b552 | 8  | 140122513 | 140122531 | 6  | 18    | 1  | 1  | NA | 2  | NA | 2  |
| Panc-AdenoCA    | ec77847e-48fd-4ba5-bc3e-3cd1b149b552 | 18 | 20279874  | 20281276  | 10 | 1402  | 3  | 4  | 3  | NA | NA | NA |
| Panc-AdenoCA    | ec77847e-48fd-4ba5-bc3e-3cd1b149b552 | 19 | 50375093  | 50375574  | 6  | 481   | NA | NA | 6  | NA | NA | NA |
| Panc-AdenoCA    | ecf388a-99f5-44b9-9226-a6ae6d892538  | 6  | 67402363  | 67404637  | 9  | 2274  | NA | 6  | 2  | 1  | NA | NA |
| Panc-AdenoCA    | ecf388a-99f5-44b9-9226-a6ae6d892538  | 6  | 67416823  | 67419191  | 8  | 2368  | 1  | 3  | 4  | NA | NA | NA |
| Panc-AdenoCA    | ecf388a-99f5-44b9-9226-a6ae6d892538  | 10 | 43238011  | 43239031  | 11 | 1020  | 3  | 2  | 6  | NA | NA | NA |
| Panc-AdenoCA    | ecf388a-99f5-44b9-9226-a6ae6d892538  | 10 | 43257321  | 43259699  | 29 | 2378  | 3  | 13 | 13 | NA | NA | NA |
| Panc-AdenoCA    | ecf388a-99f5-44b9-9226-a6ae6d892538  | 14 | 31079534  | 31085851  | 17 | 6317  | 3  | 5  | 8  | 1  | NA | NA |
| Panc-AdenoCA    | ecf388a-99f5-44b9-9226-a6ae6d892538  | 17 | 66248882  | 66250314  | 7  | 1432  | 2  | 2  | 3  | NA | NA | NA |
| Panc-AdenoCA    | ecf388a-99f5-44b9-9226-a6ae6d892538  | 17 | 66298895  | 66300028  | 12 | 1133  | 1  | 2  | 9  | NA | NA | NA |
| Panc-AdenoCA    | ecf388a-99f5-44b9-9226-a6ae6d892538  | 18 | 48566948  | 48569895  | 16 | 2947  | 3  | 9  | 4  | NA | NA | NA |
| Uterus-AdenoCA  | ed32c725-08ae-48eb-8fa2-719b9aeb7550 | 8  | 37994836  | 38007660  | 17 | 12824 | 7  | 4  | 5  | 1  | NA | NA |
| Uterus-AdenoCA  | ed32c725-08ae-48eb-8fa2-719b9aeb7550 | 8  | 68300244  | 68303583  | 9  | 3339  | 6  | 1  | 2  | NA | NA | NA |
| Uterus-AdenoCA  | ed32c725-08ae-48eb-8fa2-719b9aeb7550 | 12 | 46027758  | 46031520  | 6  | 3762  | NA | 6  | NA | NA | NA | NA |
| Uterus-AdenoCA  | ed32c725-08ae-48eb-8fa2-719b9aeb7550 | 15 | 37416600  | 37417397  | 9  | 797   | NA | NA | NA | 2  | 5  | 2  |
| Uterus-AdenoCA  | ed32c725-08ae-48eb-8fa2-719b9aeb7550 | 18 | 52364560  | 52369344  | 19 | 4784  | 5  | 12 | 2  | NA | NA | NA |
| Uterus-AdenoCA  | ed32c725-08ae-48eb-8fa2-719b9aeb7550 | X  | 54085916  | 54091782  | 13 | 5866  | NA | 2  | 11 | NA | NA | NA |
| Stomach-AdenoCA | eda1d8d9-e8f5-46f2-bb16-15d0b10c2cf9 | 2  | 124668479 | 124680040 | 13 | 11561 | NA | NA | 1  | 8  | 3  | 1  |
| Stomach-AdenoCA | eda1d8d9-e8f5-46f2-bb16-15d0b10c2cf9 | X  | 125451630 | 125458429 | 8  | 6799  | NA | NA | 2  | 5  | NA | 1  |
| Panc-AdenoCA    | edac1323-2497-45e6-9148-e9c955292ba2 | 4  | 134861812 | 134866105 | 11 | 4293  | NA | 7  | 4  | NA | NA | NA |
| Panc-AdenoCA    | edac1323-2497-45e6-9148-e9c955292ba2 | 5  | 115901037 | 115904022 | 24 | 2985  | 5  | 10 | 9  | NA | NA | NA |
| Panc-AdenoCA    | edac1323-2497-45e6-9148-e9c955292ba2 | 7  | 132251703 | 132252357 | 6  | 654   | 1  | 1  | 4  | NA | NA | NA |
| Panc-AdenoCA    | edac1323-2497-45e6-9148-e9c955292ba2 | 7  | 134335263 | 134340682 | 25 | 5419  | 4  | 4  | 17 | NA | NA | NA |
| Panc-AdenoCA    | edac1323-2497-45e6-9148-e9c955292ba2 | 8  | 11842651  | 11843902  | 16 | 1251  | 1  | 4  | 11 | NA | NA | NA |
| Panc-AdenoCA    | edac1323-2497-45e6-9148-e9c955292ba2 | 8  | 138855989 | 138868899 | 17 | 12910 | 2  | 4  | 9  | 1  | 1  | NA |
| Panc-AdenoCA    | edac1323-2497-45e6-9148-e9c955292ba2 | 13 | 70446410  | 70447274  | 6  | 864   | NA | 1  | 5  | NA | NA | NA |
| Panc-AdenoCA    | edac1323-2497-45e6-9148-e9c955292ba2 | 16 | 4289257   | 4291140   | 6  | 1883  | 1  | 1  | 4  | NA | NA | NA |
| Panc-AdenoCA    | edac1323-2497-45e6-9148-e9c955292ba2 | 16 | 5390889   | 5393496   | 15 | 2607  | 7  | 3  | 5  | NA | NA | NA |
| Panc-AdenoCA    | edac1323-2497-45e6-9148-e9c955292ba2 | 16 | 22840288  | 22847055  | 9  | 6767  | 2  | 2  | 5  | NA | NA | NA |
| Panc-AdenoCA    | edac1323-2497-45e6-9148-e9c955292ba2 | 16 | 23118483  | 23123639  | 10 | 5156  | 2  | 3  | 5  | NA | NA | NA |
| Panc-AdenoCA    | edac1323-2497-45e6-9148-e9c955292ba2 | 17 | 76762823  | 76766126  | 8  | 3303  | NA | 7  | 1  | NA | NA | NA |
| Panc-AdenoCA    | edac1323-2497-45e6-9148-e9c955292ba2 | X  | 99980380  | 99981133  | 12 | 753   | 2  | 5  | 3  | 1  | NA | 1  |
| Panc-AdenoCA    | edac1323-2497-45e6-9148-e9c955292ba2 | X  | 100138254 | 100138730 | 13 | 476   | NA | 7  | 6  | NA | NA | NA |
| Stomach-AdenoCA | edc8839f-fa6b-41e0-ad49-f688073730bd | 8  | 94594327  | 94599235  | 6  | 4908  | NA | 4  | 2  | NA | NA | NA |
| Stomach-AdenoCA | edc8839f-fa6b-41e0-ad49-f688073730bd | 21 | 25286400  | 25293725  | 10 | 7325  | NA | NA | NA | 2  | 2  | 6  |
| Breast-AdenoCa  | eddfbfb9-3ae8-449b-b870-46062a2571c1 | 3  | 127114478 | 127115577 | 12 | 1099  | 2  | 6  | 4  | NA | NA | NA |
| Breast-AdenoCa  | eddfbfb9-3ae8-449b-b870-46062a2571c1 | 5  | 85485558  | 85486865  | 10 | 1307  | NA | 5  | 5  | NA | NA | NA |
| Breast-AdenoCa  | eddfbfb9-3ae8-449b-b870-46062a2571c1 | 8  | 122174246 | 122179147 | 17 | 4901  | 3  | 10 | 3  | NA | 1  | NA |
| Panc-AdenoCA    | ee5d5e7d-78cf-4a29-a9ee-56aa3da877dd | 1  | 203685453 | 203685883 | 6  | 430   | 1  | 2  | 3  | NA | NA | NA |
| Panc-AdenoCA    | ee5d5e7d-78cf-4a29-a9ee-56aa3da877dd | 18 | 13550876  | 13552442  | 12 | 1566  | 2  | 3  | 7  | NA | NA | NA |
| Lung-SCC        | ee6cc68e-8d2a-41ee-82c6-0fecdf7e6259 | 11 | 41455057  | 41463408  | 11 | 8351  | NA | NA | 1  | 3  | 6  | 1  |
| Lung-SCC        | ee6cc68e-8d2a-41ee-82c6-0fecdf7e6259 | X  | 63092958  | 63097221  | 9  | 4263  | NA | 8  | 1  | NA | NA | NA |

|               |                                      |    |           |           |    |      |    |    |    |    |    |    |
|---------------|--------------------------------------|----|-----------|-----------|----|------|----|----|----|----|----|----|
| Lung-SCC      | ee6cc68e-8d2a-41ee-82c6-0fecdf7e6259 | X  | 102948803 | 102952158 | 7  | 3355 | NA | NA | 1  | 1  | 3  | 2  |
| Panc-AdenoCA  | ee8ba991-8c96-476e-b096-49f3aaaffc2f | 1  | 209387236 | 209387671 | 6  | 435  | NA | 3  | 3  | NA | NA | NA |
| Panc-AdenoCA  | ee8ba991-8c96-476e-b096-49f3aaaffc2f | 9  | 101465919 | 101466482 | 7  | 563  | NA | NA | 7  | NA | NA | NA |
| Panc-AdenoCA  | ee8ba991-8c96-476e-b096-49f3aaaffc2f | 15 | 80216434  | 80218444  | 16 | 2010 | 4  | 7  | 5  | NA | NA | NA |
| Panc-AdenoCA  | ee8ba991-8c96-476e-b096-49f3aaaffc2f | 18 | 1056884   | 1059361   | 7  | 2477 | NA | 3  | 4  | NA | NA | NA |
| Head-SCC      | ee963667-56b1-49bd-8896-e07b536d3014 | 7  | 87044172  | 87049160  | 11 | 4988 | 3  | 4  | 4  | NA | NA | NA |
| Skin-Melanoma | eedd7f01-93f9-4f10-85cb-9dce1760bae8 | 1  | 93296401  | 93299991  | 7  | 3590 | NA | 5  | 2  | NA | NA | NA |
| Skin-Melanoma | eedd7f01-93f9-4f10-85cb-9dce1760bae8 | 2  | 205474149 | 205482322 | 11 | 8173 | 1  | 7  | 3  | NA | NA | NA |
| Skin-Melanoma | eedd7f01-93f9-4f10-85cb-9dce1760bae8 | 6  | 142708141 | 142713115 | 8  | 4974 | NA | 5  | 3  | NA | NA | NA |
| Skin-Melanoma | eedd7f01-93f9-4f10-85cb-9dce1760bae8 | 9  | 37078226  | 37079541  | 15 | 1315 | 1  | 9  | 5  | NA | NA | NA |
| Skin-Melanoma | eedd7f01-93f9-4f10-85cb-9dce1760bae8 | 14 | 70953708  | 70955632  | 8  | 1924 | NA | 7  | 1  | NA | NA | NA |
| Panc-AdenoCA  | ef002c3d-358f-4fc0-98f3-2f8b89de4374 | 4  | 80346736  | 80348000  | 13 | 1264 | 2  | 3  | 8  | NA | NA | NA |
| Panc-AdenoCA  | ef002c3d-358f-4fc0-98f3-2f8b89de4374 | 4  | 80431381  | 80437676  | 29 | 6295 | 3  | 11 | 15 | NA | NA | NA |
| Panc-AdenoCA  | ef002c3d-358f-4fc0-98f3-2f8b89de4374 | 4  | 125188951 | 125189914 | 9  | 963  | NA | 5  | 4  | NA | NA | NA |
| Panc-AdenoCA  | ef002c3d-358f-4fc0-98f3-2f8b89de4374 | 10 | 109600831 | 109601442 | 6  | 611  | NA | 3  | 3  | NA | NA | NA |
| Panc-AdenoCA  | ef002c3d-358f-4fc0-98f3-2f8b89de4374 | 11 | 131945550 | 131949033 | 17 | 3483 | 1  | 10 | 6  | NA | NA | NA |
| Panc-AdenoCA  | ef002c3d-358f-4fc0-98f3-2f8b89de4374 | 19 | 54035840  | 54038672  | 7  | 2832 | NA | 4  | 3  | NA | NA | NA |
| Panc-AdenoCA  | ef002c3d-358f-4fc0-98f3-2f8b89de4374 | 21 | 11148714  | 11149862  | 6  | 1148 | 2  | 1  | 3  | NA | NA | NA |
| Panc-AdenoCA  | ef3a0ccd-85bc-4e5f-a8c6-5a2e2d9e6717 | 3  | 118868187 | 118870169 | 15 | 1982 | NA | 2  | 12 | 1  | NA | NA |
| Panc-AdenoCA  | ef3a0ccd-85bc-4e5f-a8c6-5a2e2d9e6717 | 13 | 78700158  | 78700398  | 7  | 240  | 1  | 2  | 4  | NA | NA | NA |
| Panc-AdenoCA  | ef3a0ccd-85bc-4e5f-a8c6-5a2e2d9e6717 | 18 | 30220054  | 30222976  | 17 | 2922 | 1  | 6  | 10 | NA | NA | NA |
| Panc-AdenoCA  | ef3a0ccd-85bc-4e5f-a8c6-5a2e2d9e6717 | 22 | 25330684  | 25331137  | 8  | 453  | NA | 6  | 2  | NA | NA | NA |
| Head-SCC      | ef673d3d-2031-4036-ba25-4bc7ef04075b | 1  | 17203361  | 17203816  | 6  | 455  | NA | 1  | 5  | NA | NA | NA |
| Head-SCC      | ef673d3d-2031-4036-ba25-4bc7ef04075b | 1  | 17543007  | 17545298  | 8  | 2291 | NA | 1  | 7  | NA | NA | NA |
| Head-SCC      | ef673d3d-2031-4036-ba25-4bc7ef04075b | 1  | 19923509  | 19926215  | 8  | 2706 | NA | 6  | 2  | NA | NA | NA |
| Head-SCC      | ef673d3d-2031-4036-ba25-4bc7ef04075b | 1  | 38036175  | 38039572  | 8  | 3397 | NA | 1  | 5  | 1  | NA | 1  |
| Head-SCC      | ef673d3d-2031-4036-ba25-4bc7ef04075b | 1  | 232036121 | 232038334 | 8  | 2213 | NA | 5  | 3  | NA | NA | NA |
| Head-SCC      | ef673d3d-2031-4036-ba25-4bc7ef04075b | 2  | 25529688  | 25530960  | 7  | 1272 | NA | 1  | 6  | NA | NA | NA |
| Head-SCC      | ef673d3d-2031-4036-ba25-4bc7ef04075b | 3  | 176869213 | 176872782 | 8  | 3569 | 1  | 3  | 4  | NA | NA | NA |
| Head-SCC      | ef673d3d-2031-4036-ba25-4bc7ef04075b | 3  | 176877869 | 176882770 | 11 | 4901 | 1  | 6  | 4  | NA | NA | NA |
| Head-SCC      | ef673d3d-2031-4036-ba25-4bc7ef04075b | 3  | 183044613 | 183046729 | 7  | 2116 | 1  | NA | 6  | NA | NA | NA |
| Head-SCC      | ef673d3d-2031-4036-ba25-4bc7ef04075b | 4  | 56197451  | 56202043  | 7  | 4592 | 1  | 2  | 3  | NA | NA | 1  |
| Head-SCC      | ef673d3d-2031-4036-ba25-4bc7ef04075b | 6  | 2500652   | 2502230   | 6  | 1578 | NA | 3  | 3  | NA | NA | NA |
| Head-SCC      | ef673d3d-2031-4036-ba25-4bc7ef04075b | 7  | 139098016 | 139099717 | 7  | 1701 | 3  | 1  | 3  | NA | NA | NA |
| Head-SCC      | ef673d3d-2031-4036-ba25-4bc7ef04075b | 7  | 157137780 | 157140606 | 7  | 2826 | NA | 2  | 5  | NA | NA | NA |
| Head-SCC      | ef673d3d-2031-4036-ba25-4bc7ef04075b | 8  | 126380721 | 126382723 | 8  | 2002 | NA | 2  | 6  | NA | NA | NA |
| Head-SCC      | ef673d3d-2031-4036-ba25-4bc7ef04075b | 9  | 116036584 | 116039899 | 7  | 3315 | 1  | 3  | 3  | NA | NA | NA |
| Head-SCC      | ef673d3d-2031-4036-ba25-4bc7ef04075b | 10 | 4697086   | 4703332   | 9  | 6246 | NA | 4  | 5  | NA | NA | NA |
| Head-SCC      | ef673d3d-2031-4036-ba25-4bc7ef04075b | 10 | 61743500  | 61747730  | 11 | 4230 | NA | 4  | 7  | NA | NA | NA |
| Head-SCC      | ef673d3d-2031-4036-ba25-4bc7ef04075b | 10 | 61828403  | 61831953  | 8  | 3550 | NA | 3  | 5  | NA | NA | NA |
| Head-SCC      | ef673d3d-2031-4036-ba25-4bc7ef04075b | 11 | 64020606  | 64028194  | 18 | 7588 | 4  | 8  | 6  | NA | NA | NA |
| Head-SCC      | ef673d3d-2031-4036-ba25-4bc7ef04075b | 12 | 51143230  | 51146342  | 9  | 3112 | NA | 2  | 7  | NA | NA | NA |
| Head-SCC      | ef673d3d-2031-4036-ba25-4bc7ef04075b | 12 | 110918116 | 110920432 | 7  | 2316 | 1  | 2  | 3  | NA | NA | 1  |
| Head-SCC      | ef673d3d-2031-4036-ba25-4bc7ef04075b | 13 | 22726938  | 22731293  | 7  | 4355 | 1  | NA | 5  | 1  | NA | NA |
| Head-SCC      | ef673d3d-2031-4036-ba25-4bc7ef04075b | 13 | 42340405  | 42342192  | 7  | 1787 | NA | 2  | 5  | NA | NA | NA |
| Head-SCC      | ef673d3d-2031-4036-ba25-4bc7ef04075b | 14 | 24810128  | 24816249  | 8  | 6121 | NA | 2  | 6  | NA | NA | NA |
| Head-SCC      | ef673d3d-2031-4036-ba25-4bc7ef04075b | 15 | 78973841  | 78976080  | 8  | 2239 | NA | NA | 8  | NA | NA | NA |
| Head-SCC      | ef673d3d-2031-4036-ba25-4bc7ef04075b | 16 | 28518068  | 28522431  | 6  | 4363 | NA | 3  | 3  | NA | NA | NA |
| Head-SCC      | ef673d3d-2031-4036-ba25-4bc7ef04075b | 16 | 67384849  | 67386225  | 9  | 1376 | 1  | 3  | 5  | NA | NA | NA |
| Head-SCC      | ef673d3d-2031-4036-ba25-4bc7ef04075b | 17 | 19232736  | 19238859  | 10 | 6123 | 1  | 4  | 5  | NA | NA | NA |
| Head-SCC      | ef673d3d-2031-4036-ba25-4bc7ef04075b | 17 | 27942016  | 27943262  | 7  | 1246 | NA | 3  | 4  | NA | NA | NA |
| Head-SCC      | ef673d3d-2031-4036-ba25-4bc7ef04075b | 17 | 74625693  | 74628446  | 8  | 2753 | NA | 2  | 6  | NA | NA | NA |
| Head-SCC      | ef673d3d-2031-4036-ba25-4bc7ef04075b | 20 | 39115971  | 39120215  | 10 | 4244 | 2  | 4  | 4  | NA | NA | NA |
| Head-SCC      | ef673d3d-2031-4036-ba25-4bc7ef04075b | 22 | 38005636  | 38009849  | 8  | 4213 | NA | 3  | 5  | NA | NA | NA |
| Head-SCC      | ef673d3d-2031-4036-ba25-4bc7ef04075b | 22 | 43629444  | 43633924  | 15 | 4480 | 2  | 5  | 8  | NA | NA | NA |
| Panc-AdenoCA  | efacd7d6-56cf-4f6a-87f0-1a7ab6b1a643 | 18 | 28166197  | 28167899  | 10 | 1702 | 1  | 4  | 5  | NA | NA | NA |
| Ovary-AdenoCA | efbec43c-0c16-4006-abe8-c3ec2ec42c05 | 2  | 138238823 | 138240563 | 8  | 1740 | 1  | 4  | 3  | NA | NA | NA |
| Ovary-AdenoCA | efec3225-de07-4559-9a90-95223495cc61 | 12 | 121328003 | 121332444 | 13 | 4441 | 6  | 3  | 4  | NA | NA | NA |
| Lymph-BNHL    | f047cb85-8f88-45d5-83c3-0416c9f3ff7  | 2  | 89158944  | 89160084  | 27 | 1140 | 3  | NA | 6  | 9  | 6  | 3  |
| Lymph-BNHL    | f047cb85-8f88-45d5-83c3-0416c9f3ff7  | 2  | 89326774  | 89327050  | 10 | 276  | NA | 4  | 4  | 1  | NA | 1  |

|                 |                                       |    |           |           |     |       |    |    |    |    |    |    |
|-----------------|---------------------------------------|----|-----------|-----------|-----|-------|----|----|----|----|----|----|
| Lymph-BNHL      | f047cb85-8f88-45d5-83c3-0416c9f3fff7  | 12 | 122458999 | 122461729 | 7   | 2730  | NA | 2  | 4  | NA | NA | 1  |
| Lymph-BNHL      | f047cb85-8f88-45d5-83c3-0416c9f3fff7  | 14 | 106112507 | 106113957 | 12  | 1450  | 1  | NA | 11 | NA | NA | NA |
| Lymph-BNHL      | f047cb85-8f88-45d5-83c3-0416c9f3fff7  | 14 | 106209043 | 106213885 | 12  | 4842  | 1  | 1  | 8  | 2  | NA | NA |
| Lymph-BNHL      | f047cb85-8f88-45d5-83c3-0416c9f3fff7  | 14 | 106322219 | 106330289 | 58  | 8070  | 6  | 8  | 17 | 13 | 9  | 5  |
| Lymph-BNHL      | f047cb85-8f88-45d5-83c3-0416c9f3fff7  | 14 | 106725266 | 106733439 | 31  | 8173  | 1  | 3  | 13 | 8  | 4  | 2  |
| Lymph-BNHL      | f047cb85-8f88-45d5-83c3-0416c9f3fff7  | 18 | 60984100  | 60988475  | 33  | 4375  | 1  | 4  | 22 | 1  | NA | 5  |
| Lymph-BNHL      | f047cb85-8f88-45d5-83c3-0416c9f3fff7  | 22 | 23223147  | 23232313  | 30  | 9166  | 3  | 4  | 15 | 4  | 2  | 2  |
| Lymph-BNHL      | f04aecf0-eb12-4ab9-928e-7bcf201b0b40  | 2  | 89157759  | 89161381  | 104 | 3622  | 5  | 14 | 20 | 37 | 17 | 11 |
| Lymph-BNHL      | f04aecf0-eb12-4ab9-928e-7bcf201b0b40  | 14 | 106208649 | 106213275 | 9   | 4626  | 1  | 1  | 7  | NA | NA | NA |
| Lymph-BNHL      | f04aecf0-eb12-4ab9-928e-7bcf201b0b40  | 14 | 106240665 | 106241919 | 7   | 1254  | NA | 2  | 5  | NA | NA | NA |
| Lymph-BNHL      | f04aecf0-eb12-4ab9-928e-7bcf201b0b40  | 14 | 106322630 | 106329345 | 76  | 6715  | 8  | 9  | 29 | 17 | 3  | 10 |
| Lymph-BNHL      | f04aecf0-eb12-4ab9-928e-7bcf201b0b40  | 14 | 106994137 | 106994603 | 11  | 466   | 1  | 1  | 4  | 1  | 2  | 2  |
| Lymph-BNHL      | f04aecf0-eb12-4ab9-928e-7bcf201b0b40  | 18 | 60984967  | 60988121  | 7   | 3154  | NA | 3  | 2  | 1  | NA | 1  |
| Lymph-BNHL      | f04aecf0-eb12-4ab9-928e-7bcf201b0b40  | 22 | 23229878  | 23232007  | 22  | 2129  | NA | 4  | 4  | 6  | 4  | 4  |
| Lymph-NOS       | f075dcdcb-4b6a-4186-bfc5-c1787c4a14ac | 1  | 103449309 | 103451554 | 7   | 2245  | NA | NA | 1  | 5  | 1  | NA |
| Lymph-NOS       | f075dcdcb-4b6a-4186-bfc5-c1787c4a14ac | 2  | 89158480  | 89197265  | 105 | 38785 | NA | 12 | 9  | 50 | 12 | 22 |
| Lymph-NOS       | f075dcdcb-4b6a-4186-bfc5-c1787c4a14ac | 3  | 187461927 | 187468087 | 10  | 6160  | NA | 5  | 1  | 2  | 1  | 1  |
| Lymph-NOS       | f075dcdcb-4b6a-4186-bfc5-c1787c4a14ac | 7  | 14969597  | 14974889  | 9   | 5292  | 1  | NA | NA | 3  | 3  | 2  |
| Lymph-NOS       | f075dcdcb-4b6a-4186-bfc5-c1787c4a14ac | 7  | 78917147  | 78921548  | 9   | 4401  | NA | NA | NA | 5  | NA | 4  |
| Lymph-NOS       | f075dcdcb-4b6a-4186-bfc5-c1787c4a14ac | 12 | 122459043 | 122463596 | 6   | 4553  | NA | 2  | NA | 2  | 1  | 1  |
| Lymph-NOS       | f075dcdcb-4b6a-4186-bfc5-c1787c4a14ac | 14 | 106326519 | 106330719 | 78  | 4200  | 2  | 23 | 18 | 23 | 6  | 6  |
| Lymph-NOS       | f075dcdcb-4b6a-4186-bfc5-c1787c4a14ac | 14 | 106494176 | 106496230 | 27  | 2054  | NA | 2  | 6  | 12 | 4  | 3  |
| Lymph-NOS       | f075dcdcb-4b6a-4186-bfc5-c1787c4a14ac | 15 | 84343165  | 84346933  | 6   | 3768  | NA | 1  | 3  | 1  | NA | 1  |
| Lymph-NOS       | f075dcdcb-4b6a-4186-bfc5-c1787c4a14ac | 22 | 23223276  | 23227767  | 6   | 4491  | 1  | 1  | 2  | NA | 1  | 1  |
| Lymph-NOS       | f075dcdcb-4b6a-4186-bfc5-c1787c4a14ac | 22 | 23230106  | 23231737  | 15  | 1631  | NA | 1  | 6  | 5  | 2  | 1  |
| Lymph-NOS       | f075dcdcb-4b6a-4186-bfc5-c1787c4a14ac | X  | 57257387  | 57257576  | 7   | 189   | NA | NA | NA | 3  | NA | 4  |
| Biliary-AdenoCA | f0e0d978-3e32-4444-a07a-26049b2594e6  | 6  | 89052087  | 89055835  | 9   | 3748  | 1  | 3  | 5  | NA | NA | NA |
| Biliary-AdenoCA | f0e0d978-3e32-4444-a07a-26049b2594e6  | 18 | 23428197  | 23429787  | 10  | 1590  | 1  | 1  | 8  | NA | NA | NA |
| Biliary-AdenoCA | f0e0d978-3e32-4444-a07a-26049b2594e6  | 18 | 30624589  | 30626236  | 20  | 1647  | 2  | 5  | 13 | NA | NA | NA |
| Biliary-AdenoCA | f0e0d978-3e32-4444-a07a-26049b2594e6  | 18 | 33597474  | 33598063  | 10  | 589   | 1  | 5  | 4  | NA | NA | NA |
| Ovary-AdenoCA   | f1504811-8363-41e6-b43c-62452b1262d3  | 18 | 24214996  | 24221423  | 14  | 6427  | 4  | 4  | 5  | NA | NA | 1  |
| Ovary-AdenoCA   | f1504811-8363-41e6-b43c-62452b1262d3  | 18 | 31751845  | 31757738  | 7   | 5893  | NA | 2  | 5  | NA | NA | NA |
| Ovary-AdenoCA   | f1504811-8363-41e6-b43c-62452b1262d3  | 18 | 72717860  | 72721501  | 12  | 3641  | 4  | 6  | 2  | NA | NA | NA |
| Prost-AdenoCA   | f1534b2a-5350-442c-bb9d-8c7142668d31  | 12 | 10905540  | 10913933  | 19  | 8393  | 2  | 9  | 8  | NA | NA | NA |
| Prost-AdenoCA   | f1534b2a-5350-442c-bb9d-8c7142668d31  | 12 | 12771316  | 12772177  | 7   | 861   | NA | 3  | 4  | NA | NA | NA |
| Prost-AdenoCA   | f1534b2a-5350-442c-bb9d-8c7142668d31  | 12 | 45490197  | 45493593  | 28  | 3396  | 1  | 6  | 21 | NA | NA | NA |
| Liver-HCC       | f181848a-c622-11e3-bf01-24c6515278c0  | 4  | 39498301  | 39498967  | 6   | 666   | 1  | 2  | 3  | NA | NA | NA |
| Liver-HCC       | f1a4f60a-5228-47cd-883f-ff8d2dfe1633  | 20 | 20960273  | 20961226  | 11  | 953   | 1  | 2  | 8  | NA | NA | NA |
| Liver-HCC       | f1a4f60a-5228-47cd-883f-ff8d2dfe1633  | 20 | 22568057  | 22569501  | 13  | 1444  | 1  | 6  | 6  | NA | NA | NA |
| Liver-HCC       | f1a4f60a-5228-47cd-883f-ff8d2dfe1633  | 20 | 61934893  | 61937407  | 11  | 2514  | 3  | 5  | 3  | NA | NA | NA |
| Panc-AdenoCA    | f1d9124e-dfa2-415e-b8b8-dd872fd3e2cb  | 4  | 117943569 | 117947606 | 8   | 4037  | NA | NA | NA | 3  | 5  | NA |
| Panc-AdenoCA    | f1d9124e-dfa2-415e-b8b8-dd872fd3e2cb  | 11 | 55366000  | 55372733  | 10  | 6733  | NA | NA | NA | 2  | 5  | 3  |
| Panc-AdenoCA    | f1d9124e-dfa2-415e-b8b8-dd872fd3e2cb  | 15 | 78652468  | 78652886  | 9   | 418   | NA | 2  | 7  | NA | NA | NA |
| Bone-Osteosarc  | f221c897-6ad0-0df9-e040-11ac0c4813ef  | 3  | 80455117  | 80457760  | 16  | 2643  | 2  | 4  | 10 | NA | NA | NA |
| Bone-Osteosarc  | f221c897-6ad0-0df9-e040-11ac0c4813ef  | 8  | 75471704  | 75473591  | 6   | 1887  | NA | NA | 1  | 5  | NA | NA |
| Bone-Osteosarc  | f221c897-6ad0-0df9-e040-11ac0c4813ef  | 18 | 21450894  | 21453307  | 9   | 2413  | 1  | 1  | 7  | NA | NA | NA |
| Breast-AdenoCa  | f221cbb5-eeefa-187f-e040-11ac0c481708 | 6  | 126233148 | 126394625 | 191 | 2E+05 | 1  | 4  | ## | NA | NA | NA |
| Breast-AdenoCa  | f221cbb5-eeefa-187f-e040-11ac0c481708 | 6  | 126430813 | 126437625 | 178 | 6812  | 2  | 2  | ## | NA | NA | NA |
| Breast-AdenoCa  | f221cbb5-eeefa-187f-e040-11ac0c481708 | 6  | 130419337 | 130489254 | 160 | 69917 | 9  | 13 | ## | 1  | NA | NA |
| Breast-AdenoCa  | f221cbb5-eeefa-187f-e040-11ac0c481708 | 6  | 131788326 | 131792696 | 7   | 4370  | NA | 1  | 6  | NA | NA | NA |
| Breast-AdenoCa  | f221cbb5-eeefa-187f-e040-11ac0c481708 | 6  | 131810126 | 131818990 | 31  | 8864  | 1  | NA | 29 | 1  | NA | NA |
| Breast-AdenoCa  | f221cbb5-eeefa-187f-e040-11ac0c481708 | 6  | 132396811 | 132410166 | 17  | 13355 | 1  | 1  | 15 | NA | NA | NA |
| Breast-AdenoCa  | f221cbb5-eeefa-187f-e040-11ac0c481708 | 6  | 132544956 | 132552483 | 12  | 7527  | 1  | 1  | 10 | NA | NA | NA |
| Breast-AdenoCa  | f221cbb5-eeefa-187f-e040-11ac0c481708 | 6  | 132599455 | 132603528 | 50  | 4073  | 2  | 7  | 41 | NA | NA | NA |
| Breast-AdenoCa  | f221cbb5-eeefa-187f-e040-11ac0c481708 | 6  | 133707397 | 133716520 | 18  | 9123  | NA | NA | 18 | NA | NA | NA |
| Breast-AdenoCa  | f221cbb5-eeefa-187f-e040-11ac0c481708 | 6  | 134015015 | 134021775 | 8   | 6760  | 1  | 2  | 5  | NA | NA | NA |
| Breast-AdenoCa  | f221cbb5-eeefa-187f-e040-11ac0c481708 | 6  | 134024091 | 134025308 | 11  | 1217  | 1  | 1  | 9  | NA | NA | NA |
| Breast-AdenoCa  | f221cbb5-eeefa-187f-e040-11ac0c481708 | 6  | 134115823 | 134118849 | 8   | 3026  | 1  | 1  | 5  | NA | NA | 1  |
| Breast-AdenoCa  | f221cbb5-eeefa-187f-e040-11ac0c481708 | 6  | 135256447 | 135262041 | 9   | 5594  | 1  | 3  | 5  | NA | NA | NA |
| Breast-AdenoCa  | f221cbb5-eeefa-187f-e040-11ac0c481708 | 6  | 137979704 | 137982971 | 7   | 3267  | 1  | 3  | 3  | NA | NA | NA |



|                  |                                       |    |           |           |    |       |    |    |    |    |    |    |
|------------------|---------------------------------------|----|-----------|-----------|----|-------|----|----|----|----|----|----|
| Breast-AdenoCa   | f221cbb5-eefa-187f-e040-11ac0c481708  | 6  | 138010047 | 138018379 | 12 | 8332  | NA | 1  | 10 | 1  | NA | NA |
| Breast-AdenoCa   | f221cbb5-eefa-187f-e040-11ac0c481708  | 12 | 10504996  | 10508274  | 14 | 3278  | 2  | NA | 12 | NA | NA | NA |
| Ovary-AdenoCA    | f26b1f44-12de-43ba-85bb-bc61741a5a88  | 1  | 42274794  | 42276427  | 16 | 1633  | 4  | 1  | 10 | NA | NA | 1  |
| Ovary-AdenoCA    | f26b1f44-12de-43ba-85bb-bc61741a5a88  | 1  | 43081573  | 43082739  | 10 | 1166  | 1  | 2  | 7  | NA | NA | NA |
| Ovary-AdenoCA    | f26b1f44-12de-43ba-85bb-bc61741a5a88  | 2  | 157464881 | 157466066 | 7  | 1185  | 2  | 4  | 1  | NA | NA | NA |
| Ovary-AdenoCA    | f26b1f44-12de-43ba-85bb-bc61741a5a88  | 4  | 17754548  | 17758952  | 8  | 4404  | 2  | 4  | 2  | NA | NA | NA |
| Ovary-AdenoCA    | f26b1f44-12de-43ba-85bb-bc61741a5a88  | 6  | 55444084  | 55444695  | 6  | 611   | 1  | 3  | 2  | NA | NA | NA |
| Ovary-AdenoCA    | f26b1f44-12de-43ba-85bb-bc61741a5a88  | 7  | 21567659  | 21569090  | 14 | 1431  | 2  | 9  | 3  | NA | NA | NA |
| Panc-AdenoCA     | f283ed80-8302-4f26-99ed-ea20d101289d  | 1  | 4929732   | 4933773   | 22 | 4041  | 2  | 8  | 12 | NA | NA | NA |
| Biliary-AdenoCA  | f2b2111c-c622-11e3-bf01-24c6515278c0  | 10 | 60787479  | 60787913  | 6  | 434   | NA | NA | NA | 2  | 4  | NA |
| Lymph-BNHL       | f2c08ac1-4755-4c36-a11d-338d8df9fa0d  | 2  | 89159862  | 89166508  | 53 | 6646  | 2  | 10 | 12 | 13 | 6  | 10 |
| Lymph-BNHL       | f2c08ac1-4755-4c36-a11d-338d8df9fa0d  | 2  | 89246833  | 89247480  | 8  | 647   | NA | 2  | 2  | 2  | 1  | 1  |
| Lymph-BNHL       | f2c08ac1-4755-4c36-a11d-338d8df9fa0d  | 6  | 143772810 | 143775680 | 16 | 2870  | NA | 7  | 9  | NA | NA | NA |
| Lymph-BNHL       | f2c08ac1-4755-4c36-a11d-338d8df9fa0d  | 14 | 106112657 | 106113989 | 10 | 1332  | 2  | 2  | 6  | NA | NA | NA |
| Lymph-BNHL       | f2c08ac1-4755-4c36-a11d-338d8df9fa0d  | 14 | 106211760 | 106212587 | 8  | 827   | 1  | 3  | 4  | NA | NA | NA |
| Lymph-BNHL       | f2c08ac1-4755-4c36-a11d-338d8df9fa0d  | 14 | 106324798 | 106330339 | 56 | 5541  | 9  | 9  | 23 | 6  | 3  | 6  |
| Lymph-BNHL       | f2c08ac1-4755-4c36-a11d-338d8df9fa0d  | 18 | 60985900  | 60988291  | 16 | 2391  | 1  | 3  | 7  | 2  | 2  | 1  |
| Eso-AdenoCa      | f2e639cc-c30c-459f-8afc-7ace7d0209c5  | 3  | 177718662 | 177723125 | 13 | 4463  | 1  | 8  | 4  | NA | NA | NA |
| Eso-AdenoCa      | f2e639cc-c30c-459f-8afc-7ace7d0209c5  | 6  | 64890956  | 64894273  | 7  | 3317  | 2  | 3  | 2  | NA | NA | NA |
| Eso-AdenoCa      | f2e639cc-c30c-459f-8afc-7ace7d0209c5  | 10 | 28910009  | 28911127  | 26 | 1118  | 6  | 7  | 13 | NA | NA | NA |
| Eso-AdenoCa      | f2e639cc-c30c-459f-8afc-7ace7d0209c5  | 13 | 94746753  | 94747656  | 17 | 903   | 3  | 3  | 11 | NA | NA | NA |
| Eso-AdenoCa      | f2e639cc-c30c-459f-8afc-7ace7d0209c5  | 17 | 42629326  | 42629773  | 9  | 447   | NA | 1  | 8  | NA | NA | NA |
| Eso-AdenoCa      | f2e639cc-c30c-459f-8afc-7ace7d0209c5  | 18 | 9881792   | 9882629   | 6  | 837   | 1  | 2  | 3  | NA | NA | NA |
| Head-SCC         | f35f7712-d5c6-47f6-98ed-704edbbc1e19  | 6  | 70441272  | 70446489  | 20 | 5217  | 2  | 6  | 12 | NA | NA | NA |
| Head-SCC         | f35f7712-d5c6-47f6-98ed-704edbbc1e19  | 8  | 208414    | 223318    | 21 | 14904 | NA | 3  | 17 | 1  | NA | NA |
| Head-SCC         | f35f7712-d5c6-47f6-98ed-704edbbc1e19  | 8  | 36066524  | 36067812  | 12 | 1288  | NA | 1  | 11 | NA | NA | NA |
| Head-SCC         | f35f7712-d5c6-47f6-98ed-704edbbc1e19  | 10 | 70578351  | 70581895  | 8  | 3544  | NA | 2  | 6  | NA | NA | NA |
| Head-SCC         | f35f7712-d5c6-47f6-98ed-704edbbc1e19  | 13 | 33123519  | 33125057  | 6  | 1538  | NA | NA | 6  | NA | NA | NA |
| Head-SCC         | f35f7712-d5c6-47f6-98ed-704edbbc1e19  | 15 | 81969233  | 81971033  | 7  | 1800  | NA | 1  | 6  | NA | NA | NA |
| Head-SCC         | f35f7712-d5c6-47f6-98ed-704edbbc1e19  | 18 | 59355713  | 59358746  | 6  | 3033  | 1  | 4  | 1  | NA | NA | NA |
| Head-SCC         | f35f7712-d5c6-47f6-98ed-704edbbc1e19  | 21 | 40132878  | 40134510  | 6  | 1632  | 1  | 3  | 2  | NA | NA | NA |
| Head-SCC         | f35f7712-d5c6-47f6-98ed-704edbbc1e19  | X  | 70429705  | 70436558  | 8  | 6853  | NA | 5  | 3  | NA | NA | NA |
| Bladder-TCC      | f389176f-d8f3-45c2-aae4-7378a3d6fc7f  | 2  | 67771988  | 67774398  | 6  | 2410  | NA | 3  | 3  | NA | NA | NA |
| Bladder-TCC      | f389176f-d8f3-45c2-aae4-7378a3d6fc7f  | 2  | 158989085 | 158992390 | 7  | 3305  | 1  | 3  | 3  | NA | NA | NA |
| Bladder-TCC      | f389176f-d8f3-45c2-aae4-7378a3d6fc7f  | 3  | 1588129   | 1592679   | 10 | 4550  | 3  | 5  | NA | 1  | NA | 1  |
| Bladder-TCC      | f389176f-d8f3-45c2-aae4-7378a3d6fc7f  | 8  | 25097988  | 25100151  | 6  | 2163  | 2  | 4  | NA | NA | NA | NA |
| Bladder-TCC      | f389176f-d8f3-45c2-aae4-7378a3d6fc7f  | 14 | 37505257  | 37518272  | 20 | 13015 | 8  | 5  | 7  | NA | NA | NA |
| Bladder-TCC      | f389176f-d8f3-45c2-aae4-7378a3d6fc7f  | 14 | 37552189  | 37558814  | 11 | 6625  | 3  | 3  | 5  | NA | NA | NA |
| Bladder-TCC      | f389176f-d8f3-45c2-aae4-7378a3d6fc7f  | 14 | 37605199  | 37607047  | 14 | 1848  | 9  | 3  | 2  | NA | NA | NA |
| Bladder-TCC      | f389176f-d8f3-45c2-aae4-7378a3d6fc7f  | 14 | 37619257  | 37631023  | 20 | 11766 | 9  | 11 | NA | NA | NA | NA |
| Bladder-TCC      | f389176f-d8f3-45c2-aae4-7378a3d6fc7f  | 15 | 29262627  | 29267475  | 32 | 4848  | 4  | 14 | 14 | NA | NA | NA |
| Bladder-TCC      | f389176f-d8f3-45c2-aae4-7378a3d6fc7f  | 17 | 45723299  | 45723527  | 8  | 228   | 2  | 3  | 3  | NA | NA | NA |
| Bladder-TCC      | f389176f-d8f3-45c2-aae4-7378a3d6fc7f  | 18 | 19020669  | 19020772  | 8  | 103   | NA | 4  | 4  | NA | NA | NA |
| Bladder-TCC      | f389176f-d8f3-45c2-aae4-7378a3d6fc7f  | 20 | 33304937  | 33312373  | 20 | 7436  | 2  | 5  | 12 | 1  | NA | NA |
| ColoRect-AdenoCA | f38b5d2e-5cab-45c7-bb0a-38b2efc5c156  | 1  | 176842114 | 176844318 | 10 | 2204  | NA | 5  | 5  | NA | NA | NA |
| ColoRect-AdenoCA | f38b5d2e-5cab-45c7-bb0a-38b2efc5c156  | 5  | 180116712 | 180117546 | 7  | 834   | NA | 5  | 2  | NA | NA | NA |
| ColoRect-AdenoCA | f38b5d2e-5cab-45c7-bb0a-38b2efc5c156  | 7  | 53012987  | 53016607  | 11 | 3620  | 5  | 3  | 2  | 1  | NA | NA |
| ColoRect-AdenoCA | f38b5d2e-5cab-45c7-bb0a-38b2efc5c156  | 10 | 6821686   | 6830945   | 11 | 9259  | 2  | 6  | 2  | 1  | NA | NA |
| ColoRect-AdenoCA | f38b5d2e-5cab-45c7-bb0a-38b2efc5c156  | 10 | 27904295  | 27909739  | 9  | 5444  | 3  | 6  | NA | NA | NA | NA |
| ColoRect-AdenoCA | f38b5d2e-5cab-45c7-bb0a-38b2efc5c156  | 12 | 2556012   | 2558744   | 8  | 2732  | 1  | 3  | 4  | NA | NA | NA |
| ColoRect-AdenoCA | f38b5d2e-5cab-45c7-bb0a-38b2efc5c156  | 19 | 22942175  | 22943757  | 6  | 1582  | 1  | 3  | 2  | NA | NA | NA |
| Breast-AdenoCa   | f393bafd-1baa-e5f4-e040-11ac0d48450b  | 5  | 173624840 | 173626444 | 15 | 1604  | 1  | 9  | 5  | NA | NA | NA |
| Breast-AdenoCa   | f393bafd-1baa-e5f4-e040-11ac0d48450b  | 6  | 16654698  | 16654723  | 6  | 25    | NA | NA | 4  | 2  | NA | NA |
| Breast-AdenoCa   | f393bafd-1baa-e5f4-e040-11ac0d48450b  | 8  | 37611250  | 37614750  | 8  | 3500  | NA | 6  | 2  | NA | NA | NA |
| Breast-AdenoCa   | f393bafd-1baa-e5f4-e040-11ac0d48450b  | 8  | 62786214  | 62786966  | 7  | 752   | NA | 3  | 4  | NA | NA | NA |
| Breast-AdenoCa   | f393bafd-1baa-e5f4-e040-11ac0d48450b  | 11 | 20542416  | 20546086  | 24 | 3670  | 1  | 11 | 11 | NA | NA | 1  |
| Breast-AdenoCa   | f393bafd-1baa-e5f4-e040-11ac0d48450b  | 15 | 25671387  | 25674669  | 6  | 3282  | 1  | 3  | 2  | NA | NA | NA |
| Breast-AdenoCa   | f393bafef-7503-5c45-e040-11ac0d484511 | 2  | 34262625  | 34284709  | 34 | 22084 | 14 | 16 | 4  | NA | NA | NA |
| Breast-AdenoCa   | f393bafef-7503-5c45-e040-11ac0d484511 | 15 | 97406152  | 97409080  | 6  | 2928  | 2  | NA | 1  | NA | NA | 3  |
| Breast-AdenoCa   | f393bb00-888d-710f-e040-11ac0d484518  | 4  | 56246905  | 56249256  | 7  | 2351  | 3  | 3  | 1  | NA | NA | NA |

|                |                                      |    |           |           |    |       |    |    |    |    |    |    |
|----------------|--------------------------------------|----|-----------|-----------|----|-------|----|----|----|----|----|----|
| Breast-AdenoCa | f393bb00-888d-710f-e040-11ac0d484518 | 4  | 56254598  | 56255693  | 7  | 1095  | 1  | NA | 6  | NA | NA | NA |
| Breast-AdenoCa | f393bb01-6ed7-9533-e040-11ac0d484521 | 7  | 121441036 | 121445905 | 6  | 4869  | NA | 4  | 1  | 1  | NA | NA |
| Breast-AdenoCa | f393bb01-6ed7-9533-e040-11ac0d484521 | 9  | 91359485  | 91363713  | 7  | 4228  | 1  | 4  | 2  | NA | NA | NA |
| Breast-AdenoCa | f393bb01-6ed7-9533-e040-11ac0d484521 | 10 | 37885462  | 37888921  | 19 | 3459  | 8  | 8  | 2  | NA | NA | 1  |
| Breast-AdenoCa | f393bb01-6ed7-9533-e040-11ac0d484521 | 10 | 38201372  | 38203035  | 30 | 1663  | 9  | 7  | 13 | NA | NA | 1  |
| Breast-AdenoCa | f393bb01-6ed7-9533-e040-11ac0d484521 | 10 | 121309080 | 121322097 | 16 | 13017 | 1  | 5  | 10 | NA | NA | NA |
| Breast-AdenoCa | f393bb05-53c2-f80a-e040-11ac0d484528 | 2  | 67735650  | 67744177  | 16 | 8527  | 2  | 7  | 6  | NA | NA | 1  |
| Breast-AdenoCa | f393bb05-ec1c-17be-e040-11ac0d48452f | 2  | 132363019 | 132364134 | 6  | 1115  | 1  | 3  | 2  | NA | NA | NA |
| Breast-AdenoCa | f393bb05-ec1c-17be-e040-11ac0d48452f | 3  | 73649074  | 73660947  | 15 | 11873 | 1  | 1  | 13 | NA | NA | NA |
| Breast-AdenoCa | f393bb05-ec1c-17be-e040-11ac0d48452f | 3  | 73664621  | 73666636  | 7  | 2015  | NA | 1  | 6  | NA | NA | NA |
| Breast-AdenoCa | f393bb05-ec1c-17be-e040-11ac0d48452f | 3  | 74093063  | 74108819  | 19 | 15756 | NA | 11 | 8  | NA | NA | NA |
| Breast-AdenoCa | f393bb05-ec1c-17be-e040-11ac0d48452f | 3  | 77898746  | 77903154  | 8  | 4408  | NA | 2  | 6  | NA | NA | NA |
| Breast-AdenoCa | f393bb05-ec1c-17be-e040-11ac0d48452f | 3  | 96463847  | 96465970  | 7  | 2123  | 2  | 4  | 1  | NA | NA | NA |
| Breast-AdenoCa | f393bb05-ec1c-17be-e040-11ac0d48452f | 4  | 54328647  | 54330646  | 6  | 1999  | NA | NA | 6  | NA | NA | NA |
| Breast-AdenoCa | f393bb05-ec1c-17be-e040-11ac0d48452f | 4  | 56434812  | 56436213  | 8  | 1401  | 1  | NA | 7  | NA | NA | NA |
| Breast-AdenoCa | f393bb05-ec1c-17be-e040-11ac0d48452f | 4  | 74625193  | 74626287  | 17 | 1094  | NA | NA | 17 | NA | NA | NA |
| Breast-AdenoCa | f393bb05-ec1c-17be-e040-11ac0d48452f | 4  | 75558707  | 75560994  | 8  | 2287  | NA | 8  | NA | NA | NA | NA |
| Breast-AdenoCa | f393bb05-ec1c-17be-e040-11ac0d48452f | 4  | 76987429  | 76990089  | 10 | 2660  | NA | 3  | 7  | NA | NA | NA |
| Breast-AdenoCa | f393bb05-ec1c-17be-e040-11ac0d48452f | 4  | 88912564  | 88924250  | 24 | 11686 | 2  | 13 | 9  | NA | NA | NA |
| Breast-AdenoCa | f393bb05-ec1c-17be-e040-11ac0d48452f | 4  | 126024088 | 126027474 | 14 | 3386  | NA | 8  | 6  | NA | NA | NA |
| Breast-AdenoCa | f393bb05-ec1c-17be-e040-11ac0d48452f | 4  | 126198161 | 126201366 | 10 | 3205  | NA | NA | 10 | NA | NA | NA |
| Breast-AdenoCa | f393bb05-ec1c-17be-e040-11ac0d48452f | 4  | 157227818 | 157229680 | 9  | 1862  | NA | 6  | 3  | NA | NA | NA |
| Breast-AdenoCa | f393bb05-ec1c-17be-e040-11ac0d48452f | 4  | 164420639 | 164428829 | 16 | 8190  | 3  | 4  | 9  | NA | NA | NA |
| Breast-AdenoCa | f393bb05-ec1c-17be-e040-11ac0d48452f | 6  | 158151640 | 158157605 | 31 | 5965  | 2  | 15 | 14 | NA | NA | NA |
| Breast-AdenoCa | f393bb05-ec1c-17be-e040-11ac0d48452f | 8  | 43101096  | 43105420  | 8  | 4324  | NA | 5  | 3  | NA | NA | NA |
| Breast-AdenoCa | f393bb05-ec1c-17be-e040-11ac0d48452f | 8  | 88697677  | 88699927  | 8  | 2250  | NA | 6  | 2  | NA | NA | NA |
| Breast-AdenoCa | f393bb05-ec1c-17be-e040-11ac0d48452f | 8  | 91702622  | 91704432  | 9  | 1810  | 1  | 4  | 4  | NA | NA | NA |
| Breast-AdenoCa | f393bb05-ec1c-17be-e040-11ac0d48452f | 8  | 91902732  | 91904826  | 9  | 2094  | NA | 3  | 6  | NA | NA | NA |
| Breast-AdenoCa | f393bb05-ec1c-17be-e040-11ac0d48452f | 10 | 17287099  | 17287982  | 6  | 883   | 2  | 1  | 3  | NA | NA | NA |
| Breast-AdenoCa | f393bb05-ec1c-17be-e040-11ac0d48452f | 10 | 24506055  | 24507243  | 18 | 1188  | 1  | 2  | 15 | NA | NA | NA |
| Breast-AdenoCa | f393bb05-ec1c-17be-e040-11ac0d48452f | 10 | 24724120  | 24726795  | 15 | 2675  | 1  | 9  | 5  | NA | NA | NA |
| Breast-AdenoCa | f393bb05-ec1c-17be-e040-11ac0d48452f | 10 | 25405061  | 25405857  | 7  | 796   | 2  | 2  | 3  | NA | NA | NA |
| Breast-AdenoCa | f393bb05-ec1c-17be-e040-11ac0d48452f | 10 | 55289338  | 55294185  | 8  | 4847  | 1  | 4  | 2  | NA | 1  | NA |
| Breast-AdenoCa | f393bb05-ec1c-17be-e040-11ac0d48452f | 10 | 57287133  | 57289397  | 10 | 2264  | 1  | 5  | 4  | NA | NA | NA |
| Breast-AdenoCa | f393bb05-ec1c-17be-e040-11ac0d48452f | 10 | 57323991  | 57329065  | 27 | 5074  | 7  | 14 | 5  | NA | NA | 1  |
| Breast-AdenoCa | f393bb05-ec1c-17be-e040-11ac0d48452f | 11 | 66514354  | 66517276  | 12 | 2922  | 5  | 3  | 4  | NA | NA | NA |
| Breast-AdenoCa | f393bb05-ec1c-17be-e040-11ac0d48452f | 11 | 79897069  | 79897422  | 8  | 353   | NA | 3  | 5  | NA | NA | NA |
| Breast-AdenoCa | f393bb05-ec1c-17be-e040-11ac0d48452f | 11 | 80439985  | 80440147  | 7  | 162   | NA | NA | 7  | NA | NA | NA |
| Breast-AdenoCa | f393bb05-ec1c-17be-e040-11ac0d48452f | 12 | 26476587  | 26478884  | 8  | 2297  | 1  | 6  | 1  | NA | NA | NA |
| Breast-AdenoCa | f393bb05-ec1c-17be-e040-11ac0d48452f | 12 | 66725767  | 66731227  | 10 | 5460  | 1  | 5  | 3  | 1  | NA | NA |
| Breast-AdenoCa | f393bb05-ec1c-17be-e040-11ac0d48452f | 12 | 66844953  | 66856770  | 19 | 11817 | 2  | 12 | 4  | NA | NA | 1  |
| Breast-AdenoCa | f393bb05-ec1c-17be-e040-11ac0d48452f | 12 | 67313572  | 67315554  | 7  | 1982  | NA | 4  | 3  | NA | NA | NA |
| Breast-AdenoCa | f393bb05-ec1c-17be-e040-11ac0d48452f | 12 | 67633021  | 67634276  | 7  | 1255  | 1  | 6  | NA | NA | NA | NA |
| Breast-AdenoCa | f393bb05-ec1c-17be-e040-11ac0d48452f | 12 | 68453716  | 68455076  | 11 | 1360  | 1  | 3  | 6  | NA | NA | 1  |
| Breast-AdenoCa | f393bb05-ec1c-17be-e040-11ac0d48452f | 12 | 70985062  | 70994342  | 19 | 9280  | 1  | 7  | 11 | NA | NA | NA |
| Breast-AdenoCa | f393bb05-ec1c-17be-e040-11ac0d48452f | 12 | 71418699  | 71422455  | 9  | 3756  | NA | 4  | 5  | NA | NA | NA |
| Breast-AdenoCa | f393bb05-ec1c-17be-e040-11ac0d48452f | 12 | 71722726  | 71729176  | 9  | 6450  | NA | 3  | 6  | NA | NA | NA |
| Breast-AdenoCa | f393bb05-ec1c-17be-e040-11ac0d48452f | 12 | 71850536  | 71852522  | 11 | 1986  | NA | 5  | 6  | NA | NA | NA |
| Breast-AdenoCa | f393bb05-ec1c-17be-e040-11ac0d48452f | 12 | 71862650  | 71867824  | 11 | 5174  | 2  | 5  | 4  | NA | NA | NA |
| Breast-AdenoCa | f393bb05-ec1c-17be-e040-11ac0d48452f | 12 | 73437579  | 73441470  | 14 | 3891  | 1  | 6  | 7  | NA | NA | NA |
| Breast-AdenoCa | f393bb05-ec1c-17be-e040-11ac0d48452f | 12 | 73453894  | 73455816  | 9  | 1922  | NA | NA | 9  | NA | NA | NA |
| Breast-AdenoCa | f393bb05-ec1c-17be-e040-11ac0d48452f | 12 | 73480480  | 73482074  | 10 | 1594  | 2  | 2  | 6  | NA | NA | NA |
| Breast-AdenoCa | f393bb05-ec1c-17be-e040-11ac0d48452f | 13 | 49401070  | 49402728  | 6  | 1658  | NA | NA | 6  | NA | NA | NA |
| Breast-AdenoCa | f393bb05-ec1c-17be-e040-11ac0d48452f | 13 | 49412727  | 49414195  | 11 | 1468  | 1  | 2  | 8  | NA | NA | NA |
| Breast-AdenoCa | f393bb05-ec1c-17be-e040-11ac0d48452f | 16 | 65595712  | 65596793  | 11 | 1081  | NA | NA | 11 | NA | NA | NA |
| Breast-AdenoCa | f393bb05-ec1c-17be-e040-11ac0d48452f | 17 | 7492600   | 7497727   | 20 | 5127  | 2  | 12 | 6  | NA | NA | NA |
| Breast-AdenoCa | f393bb05-ec1c-17be-e040-11ac0d48452f | 17 | 8929005   | 8929566   | 7  | 561   | NA | NA | 7  | NA | NA | NA |
| Breast-AdenoCa | f393bb05-ec1c-17be-e040-11ac0d48452f | 19 | 37797662  | 37798516  | 9  | 854   | NA | 1  | 8  | NA | NA | NA |
| Breast-AdenoCa | f393bb05-ec1c-17be-e040-11ac0d48452f | 20 | 31472480  | 31478185  | 24 | 5705  | 3  | 15 | 6  | NA | NA | NA |
| Breast-AdenoCa | f393bb05-ec1c-17be-e040-11ac0d48452f | 21 | 18355830  | 18357993  | 6  | 2163  | NA | 4  | 1  | NA | NA | 1  |

|                |                                      |    |           |           |    |       |    |    |    |    |    |    |
|----------------|--------------------------------------|----|-----------|-----------|----|-------|----|----|----|----|----|----|
| Breast-AdenoCa | f393bb05-ec1c-17be-e040-11ac0d48452f | X  | 32123861  | 32124505  | 9  | 644   | NA | 5  | 3  | NA | NA | 1  |
| Breast-AdenoCa | f393bb05-ec1c-17be-e040-11ac0d48452f | X  | 32345326  | 32348028  | 12 | 2702  | 1  | 4  | 7  | NA | NA | NA |
| Breast-AdenoCa | f393bb05-ec1c-17be-e040-11ac0d48452f | X  | 32743161  | 32744197  | 8  | 1036  | NA | 7  | 1  | NA | NA | NA |
| Breast-AdenoCa | f393bb07-270c-2c93-e040-11ac0d484533 | 11 | 68962929  | 68963994  | 6  | 1065  | NA | 4  | 2  | NA | NA | NA |
| Breast-AdenoCa | f393bb07-270c-2c93-e040-11ac0d484533 | 11 | 78824054  | 78825767  | 8  | 1713  | NA | 4  | 4  | NA | NA | NA |
| Breast-AdenoCa | f393bb08-5b50-e009-e040-11ac0d484537 | 5  | 55991444  | 55996280  | 13 | 4836  | 3  | 8  | 1  | NA | 1  | NA |
| Breast-AdenoCa | f393bb08-5b50-e009-e040-11ac0d484537 | 10 | 115268236 | 115272259 | 8  | 4023  | 1  | NA | 1  | 3  | NA | 3  |
| Breast-AdenoCa | f393bb08-5b50-e009-e040-11ac0d484537 | 10 | 117593152 | 117594233 | 9  | 1081  | NA | 6  | 3  | NA | NA | NA |
| Breast-AdenoCa | f393bb08-5b50-e009-e040-11ac0d484537 | 12 | 48661295  | 48662234  | 8  | 939   | 1  | 4  | 3  | NA | NA | NA |
| Breast-AdenoCa | f393bb08-5b50-e009-e040-11ac0d484537 | 16 | 23595884  | 23597189  | 7  | 1305  | 1  | 2  | 4  | NA | NA | NA |
| Breast-AdenoCa | f393bb08-5b50-e009-e040-11ac0d484537 | 17 | 21217055  | 21220257  | 10 | 3202  | NA | NA | 10 | NA | NA | NA |
| Breast-AdenoCa | f393bb08-5b50-e009-e040-11ac0d484537 | 18 | 28267552  | 28270158  | 14 | 2606  | 2  | 9  | 3  | NA | NA | NA |
| Breast-AdenoCa | f393bb08-5b50-e009-e040-11ac0d484537 | 19 | 24160140  | 24160598  | 6  | 458   | 1  | 3  | 1  | NA | 1  | NA |
| Breast-AdenoCa | f393bb08-5b50-e009-e040-11ac0d484537 | 22 | 44489193  | 44494957  | 10 | 5764  | 1  | 7  | 2  | NA | NA | NA |
| Breast-AdenoCa | f393bb0a-9b20-a0e5-e040-11ac0d48454e | 1  | 40804052  | 40804517  | 9  | 465   | NA | 8  | 1  | NA | NA | NA |
| Breast-AdenoCa | f393bb0a-9b20-a0e5-e040-11ac0d48454e | 8  | 39131841  | 39135563  | 16 | 3722  | NA | 5  | 11 | NA | NA | NA |
| Breast-AdenoCa | f393bb0a-9b20-a0e5-e040-11ac0d48454e | 14 | 34483513  | 34487399  | 11 | 3886  | 3  | 2  | 6  | NA | NA | NA |
| Breast-AdenoCa | f393bb0a-9b20-a0e5-e040-11ac0d48454e | 17 | 37497596  | 37504367  | 14 | 6771  | 1  | 4  | 9  | NA | NA | NA |
| Breast-AdenoCa | f393bb0a-df7d-645c-e040-11ac0d484550 | 1  | 52686607  | 52687615  | 7  | 1008  | NA | 3  | 4  | NA | NA | NA |
| Breast-AdenoCa | f393bb0a-df7d-645c-e040-11ac0d484550 | 1  | 58209671  | 58216379  | 23 | 6708  | 2  | 6  | 15 | NA | NA | NA |
| Breast-AdenoCa | f393bb0a-df7d-645c-e040-11ac0d484550 | 1  | 58811855  | 58812442  | 8  | 587   | NA | 8  | NA | NA | NA | NA |
| Breast-AdenoCa | f393bb0a-df7d-645c-e040-11ac0d484550 | 2  | 45284339  | 45285531  | 6  | 1192  | NA | 3  | 3  | NA | NA | NA |
| Breast-AdenoCa | f393bb0a-df7d-645c-e040-11ac0d484550 | 2  | 145050921 | 145056596 | 7  | 5675  | NA | 1  | 6  | NA | NA | NA |
| Breast-AdenoCa | f393bb0a-df7d-645c-e040-11ac0d484550 | 2  | 203675091 | 203682856 | 16 | 7765  | 3  | 5  | 8  | NA | NA | NA |
| Breast-AdenoCa | f393bb0a-df7d-645c-e040-11ac0d484550 | 3  | 72919362  | 72925993  | 14 | 6631  | 1  | 8  | 4  | NA | NA | 1  |
| Breast-AdenoCa | f393bb0a-df7d-645c-e040-11ac0d484550 | 5  | 11772687  | 11774767  | 7  | 2080  | NA | 2  | 5  | NA | NA | NA |
| Breast-AdenoCa | f393bb0a-df7d-645c-e040-11ac0d484550 | 5  | 67020081  | 67022763  | 27 | 2682  | NA | 4  | 23 | NA | NA | NA |
| Breast-AdenoCa | f393bb0a-df7d-645c-e040-11ac0d484550 | 6  | 109632327 | 109641082 | 10 | 8755  | 1  | 2  | 7  | NA | NA | NA |
| Breast-AdenoCa | f393bb0a-df7d-645c-e040-11ac0d484550 | 6  | 109642711 | 109649666 | 9  | 6955  | 2  | NA | 7  | NA | NA | NA |
| Breast-AdenoCa | f393bb0a-df7d-645c-e040-11ac0d484550 | 8  | 108218755 | 108219861 | 14 | 1106  | 5  | 5  | 4  | NA | NA | NA |
| Breast-AdenoCa | f393bb0a-df7d-645c-e040-11ac0d484550 | 8  | 128408127 | 128433414 | 33 | 25287 | 6  | 10 | 17 | NA | NA | NA |
| Breast-AdenoCa | f393bb0a-df7d-645c-e040-11ac0d484550 | 9  | 117390817 | 117394646 | 6  | 3829  | 2  | 1  | 3  | NA | NA | NA |
| Breast-AdenoCa | f393bb0a-df7d-645c-e040-11ac0d484550 | 11 | 70769665  | 70775331  | 7  | 5666  | 1  | 1  | 5  | NA | NA | NA |
| Breast-AdenoCa | f393bb0a-df7d-645c-e040-11ac0d484550 | 11 | 70776699  | 70784309  | 9  | 7610  | NA | 2  | 7  | NA | NA | NA |
| Breast-AdenoCa | f393bb0a-df7d-645c-e040-11ac0d484550 | 12 | 56497424  | 56500493  | 6  | 3069  | 1  | NA | 5  | NA | NA | NA |
| Breast-AdenoCa | f393bb0a-df7d-645c-e040-11ac0d484550 | 12 | 65421768  | 65427555  | 9  | 5787  | 2  | 3  | 4  | NA | NA | NA |
| Breast-AdenoCa | f393bb0a-df7d-645c-e040-11ac0d484550 | 12 | 113223785 | 113228606 | 10 | 4821  | 2  | 3  | 5  | NA | NA | NA |
| Breast-AdenoCa | f393bb0a-df7d-645c-e040-11ac0d484550 | 12 | 115315473 | 115318646 | 9  | 3173  | 1  | 3  | 5  | NA | NA | NA |
| Breast-AdenoCa | f393bb0a-df7d-645c-e040-11ac0d484550 | 15 | 26266291  | 26271068  | 8  | 4777  | 1  | 3  | 4  | NA | NA | NA |
| Breast-AdenoCa | f393bb0a-df7d-645c-e040-11ac0d484550 | 15 | 61374295  | 61382676  | 13 | 8381  | 1  | 3  | 9  | NA | NA | NA |
| Breast-AdenoCa | f393bb0a-df7d-645c-e040-11ac0d484550 | 16 | 4963730   | 4965780   | 6  | 2050  | NA | 3  | 3  | NA | NA | NA |
| Breast-AdenoCa | f393bb0a-df7d-645c-e040-11ac0d484550 | 17 | 37371264  | 37375915  | 6  | 4651  | 1  | NA | 4  | NA | NA | 1  |
| Breast-AdenoCa | f393bb0a-df7d-645c-e040-11ac0d484550 | 17 | 37949858  | 37956355  | 17 | 6497  | NA | 7  | 10 | NA | NA | NA |
| Breast-AdenoCa | f393bb0a-df7d-645c-e040-11ac0d484550 | 19 | 42849576  | 42871045  | 30 | 21469 | 2  | 5  | 23 | NA | NA | NA |
| Breast-AdenoCa | f393bb0a-df7d-645c-e040-11ac0d484550 | 19 | 47527623  | 47529863  | 11 | 2240  | NA | 4  | 7  | NA | NA | NA |
| Breast-AdenoCa | f393bb0b-08ed-3335-e040-11ac0d484554 | 3  | 188844053 | 188851859 | 21 | 7806  | 6  | 5  | 9  | NA | NA | 1  |
| Breast-AdenoCa | f393bb0b-08ed-3335-e040-11ac0d484554 | 8  | 17688977  | 17689461  | 12 | 484   | 6  | 5  | NA | NA | NA | 1  |
| Breast-AdenoCa | f393bb0b-08ed-3335-e040-11ac0d484554 | 8  | 43703674  | 43704447  | 7  | 773   | 4  | 3  | NA | NA | NA | NA |
| Breast-AdenoCa | f393bb0b-08ed-3335-e040-11ac0d484554 | 8  | 59929821  | 59931043  | 8  | 1222  | 2  | 3  | 3  | NA | NA | NA |
| Breast-AdenoCa | f393bb0b-08ed-3335-e040-11ac0d484554 | 11 | 4233607   | 4234939   | 12 | 1332  | 2  | 4  | 6  | NA | NA | NA |
| Breast-AdenoCa | f393bb0b-08ed-3335-e040-11ac0d484554 | 11 | 90521038  | 90524583  | 7  | 3545  | 1  | 3  | 3  | NA | NA | NA |
| Breast-AdenoCa | f393bb0b-08ed-3335-e040-11ac0d484554 | 14 | 103258683 | 103265053 | 13 | 6370  | 1  | 4  | 8  | NA | NA | NA |
| Breast-AdenoCa | f393bb0b-08ed-3335-e040-11ac0d484554 | 19 | 13389122  | 13389561  | 7  | 439   | 1  | 2  | 4  | NA | NA | NA |
| Breast-AdenoCa | f393bb0b-08ed-3335-e040-11ac0d484554 | 19 | 15711458  | 15715746  | 10 | 4288  | 2  | 7  | NA | NA | NA | 1  |
| Breast-AdenoCa | f393bb0b-08ed-3335-e040-11ac0d484554 | 19 | 33310259  | 33314350  | 10 | 4091  | 3  | 3  | 4  | NA | NA | NA |
| Liver-HCC      | f410b432-c622-11e3-bf01-24c6515278c0 | 5  | 105723383 | 105724404 | 6  | 1021  | NA | NA | NA | 3  | 2  | 1  |
| Eso-AdenoCa    | f48c3c82-bebe-4b8e-909e-e1a51a7142ec | 1  | 114912629 | 114916521 | 8  | 3892  | 2  | 4  | 2  | NA | NA | NA |
| Eso-AdenoCa    | f48c3c82-bebe-4b8e-909e-e1a51a7142ec | 10 | 17571104  | 17579832  | 11 | 8728  | 3  | 5  | 3  | NA | NA | NA |
| Eso-AdenoCa    | f48c3c82-bebe-4b8e-909e-e1a51a7142ec | 11 | 98004688  | 98005829  | 10 | 1141  | 4  | 2  | 4  | NA | NA | NA |
| Eso-AdenoCa    | f48c3c82-bebe-4b8e-909e-e1a51a7142ec | 13 | 58648587  | 58649298  | 11 | 711   | 5  | 5  | 1  | NA | NA | NA |

|                |                                      |    |           |           |     |       |    |    |    |    |    |    |
|----------------|--------------------------------------|----|-----------|-----------|-----|-------|----|----|----|----|----|----|
| Eso-AdenoCa    | f48c3c82-bebe-4b8e-909e-e1a51a7142ec | 18 | 22821208  | 22822228  | 7   | 1020  | NA | 4  | 2  | NA | NA | 1  |
| Panc-AdenoCA   | f4e673a9-5b85-46e7-bcac-2ce6e1026896 | 2  | 123805969 | 123811553 | 7   | 5584  | NA | NA | 1  | 5  | 1  | NA |
| Panc-AdenoCA   | f4e673a9-5b85-46e7-bcac-2ce6e1026896 | 4  | 59990298  | 60000618  | 15  | 10320 | 1  | NA | NA | 4  | 6  | 4  |
| Panc-AdenoCA   | f4e673a9-5b85-46e7-bcac-2ce6e1026896 | 4  | 131205817 | 131214845 | 12  | 9028  | NA | NA | NA | 7  | 4  | 1  |
| Panc-AdenoCA   | f4e926fd-006e-4c85-b71c-1433c325acb0 | 1  | 68836812  | 68838858  | 19  | 2046  | NA | 9  | 10 | NA | NA | NA |
| Panc-AdenoCA   | f4e926fd-006e-4c85-b71c-1433c325acb0 | 6  | 35157723  | 35160814  | 10  | 3091  | 2  | 4  | 3  | NA | NA | 1  |
| Panc-AdenoCA   | f4e926fd-006e-4c85-b71c-1433c325acb0 | 8  | 15524505  | 15528291  | 6   | 3786  | NA | 4  | 2  | NA | NA | NA |
| Panc-AdenoCA   | f4e926fd-006e-4c85-b71c-1433c325acb0 | 9  | 97386817  | 97393717  | 31  | 6900  | 1  | 14 | 15 | NA | 1  | NA |
| Panc-AdenoCA   | f4e926fd-006e-4c85-b71c-1433c325acb0 | 18 | 48478784  | 48479322  | 6   | 538   | NA | NA | 6  | NA | NA | NA |
| Prost-AdenoCA  | f5378545-17d4-4a64-a57e-f6c91ef4cb3a | 1  | 239013752 | 239017948 | 6   | 4196  | 1  | NA | 2  | 1  | 1  | 1  |
| Prost-AdenoCA  | f5378545-17d4-4a64-a57e-f6c91ef4cb3a | 2  | 222267845 | 222268260 | 6   | 415   | 1  | NA | NA | 1  | 4  | NA |
| Prost-AdenoCA  | f5378545-17d4-4a64-a57e-f6c91ef4cb3a | 4  | 116573893 | 116575274 | 6   | 1381  | NA | 1  | 1  | 2  | 2  | NA |
| Prost-AdenoCA  | f5378545-17d4-4a64-a57e-f6c91ef4cb3a | 4  | 145167256 | 145169638 | 7   | 2382  | NA | NA | 2  | 1  | 3  | 1  |
| Prost-AdenoCA  | f5378545-17d4-4a64-a57e-f6c91ef4cb3a | 7  | 62130930  | 62133010  | 6   | 2080  | 1  | NA | 2  | 1  | NA | 2  |
| Prost-AdenoCA  | f5378545-17d4-4a64-a57e-f6c91ef4cb3a | 8  | 75298534  | 75300752  | 6   | 2218  | NA | NA | 2  | 3  | 1  | NA |
| Prost-AdenoCA  | f5378545-17d4-4a64-a57e-f6c91ef4cb3a | 8  | 134624891 | 134633533 | 16  | 8642  | 2  | 8  | 6  | NA | NA | NA |
| Prost-AdenoCA  | f5378545-17d4-4a64-a57e-f6c91ef4cb3a | 13 | 93445064  | 93447502  | 7   | 2438  | NA | 2  | 2  | 1  | 2  | NA |
| Prost-AdenoCA  | f5378545-17d4-4a64-a57e-f6c91ef4cb3a | 14 | 63573583  | 63575765  | 6   | 2182  | NA | NA | 2  | 2  | NA | 2  |
| Prost-AdenoCA  | f5378545-17d4-4a64-a57e-f6c91ef4cb3a | 15 | 97822907  | 97823788  | 7   | 881   | NA | NA | 2  | 4  | NA | 1  |
| Prost-AdenoCA  | f5378545-17d4-4a64-a57e-f6c91ef4cb3a | 18 | 68000850  | 68003154  | 7   | 2304  | NA | 2  | 5  | NA | NA | NA |
| Prost-AdenoCA  | f5378545-17d4-4a64-a57e-f6c91ef4cb3a | X  | 21230556  | 21236966  | 9   | 6410  | NA | NA | 4  | 1  | 3  | 1  |
| Prost-AdenoCA  | f5378545-17d4-4a64-a57e-f6c91ef4cb3a | Y  | 9914315   | 9918843   | 6   | 4528  | NA | 1  | 3  | NA | 1  | 1  |
| Panc-AdenoCA   | f5bb7ae4-4bb4-4e87-b83c-bc8620584989 | 17 | 73492855  | 73494951  | 6   | 2096  | 1  | NA | 5  | NA | NA | NA |
| Panc-AdenoCA   | f5bb7ae4-4bb4-4e87-b83c-bc8620584989 | 18 | 64752876  | 64754803  | 12  | 1927  | 1  | 5  | 5  | NA | 1  | NA |
| Lymph-BNHL     | f60007b3-0603-4ad1-8b47-d2d4c4c621e4 | 14 | 106112552 | 106113782 | 6   | 1230  | NA | 2  | 4  | NA | NA | NA |
| Lymph-BNHL     | f60007b3-0603-4ad1-8b47-d2d4c4c621e4 | 14 | 106325787 | 106329165 | 60  | 3378  | 2  | 11 | 14 | 13 | 11 | 9  |
| Lymph-BNHL     | f60007b3-0603-4ad1-8b47-d2d4c4c621e4 | 14 | 106994205 | 106995254 | 13  | 1049  | NA | NA | 3  | 2  | 3  | 5  |
| Lymph-BNHL     | f60007b3-0603-4ad1-8b47-d2d4c4c621e4 | 18 | 60983996  | 60988261  | 34  | 4265  | 6  | 7  | 6  | 6  | 4  | 5  |
| Lymph-BNHL     | f60007b3-0603-4ad1-8b47-d2d4c4c621e4 | 22 | 22380014  | 22380927  | 10  | 913   | 2  | NA | 5  | 1  | 1  | 1  |
| Lymph-BNHL     | f60007b3-0603-4ad1-8b47-d2d4c4c621e4 | 22 | 23152566  | 23154755  | 11  | 2189  | NA | 2  | 5  | 1  | 2  | 1  |
| Prost-AdenoCA  | f601cf2f-081f-484d-ab0e-21a8ec8d3770 | 7  | 39270292  | 39275304  | 17  | 5012  | NA | 6  | 6  | 1  | 3  | 1  |
| Prost-AdenoCA  | f601cf2f-081f-484d-ab0e-21a8ec8d3770 | 11 | 107031811 | 107033714 | 7   | 1903  | NA | 3  | 4  | NA | NA | NA |
| Breast-AdenoCa | f6114c69-71a1-47d5-9b28-b0227b1872f7 | 1  | 212748071 | 212748481 | 6   | 410   | NA | NA | 6  | NA | NA | NA |
| Breast-AdenoCa | f6114c69-71a1-47d5-9b28-b0227b1872f7 | 4  | 57448763  | 57450734  | 10  | 1971  | NA | 5  | 5  | NA | NA | NA |
| Breast-AdenoCa | f6114c69-71a1-47d5-9b28-b0227b1872f7 | 8  | 92661802  | 92664431  | 7   | 2629  | NA | NA | 7  | NA | NA | NA |
| Breast-AdenoCa | f6114c69-71a1-47d5-9b28-b0227b1872f7 | 8  | 98129348  | 98134678  | 48  | 5330  | 2  | 14 | 29 | 1  | 1  | 1  |
| Breast-AdenoCa | f6114c69-71a1-47d5-9b28-b0227b1872f7 | 8  | 98396372  | 98404149  | 41  | 7777  | 3  | 4  | 34 | NA | NA | NA |
| Breast-AdenoCa | f6114c69-71a1-47d5-9b28-b0227b1872f7 | 8  | 98452224  | 98456466  | 14  | 4242  | NA | 2  | 12 | NA | NA | NA |
| Breast-AdenoCa | f6114c69-71a1-47d5-9b28-b0227b1872f7 | 8  | 101276441 | 101278410 | 13  | 1969  | 1  | 7  | 5  | NA | NA | NA |
| Breast-AdenoCa | f6114c69-71a1-47d5-9b28-b0227b1872f7 | 8  | 115707309 | 115709120 | 10  | 1811  | 1  | 4  | 5  | NA | NA | NA |
| Breast-AdenoCa | f6114c69-71a1-47d5-9b28-b0227b1872f7 | 8  | 117609045 | 117612253 | 7   | 3208  | NA | 6  | 1  | NA | NA | NA |
| Breast-AdenoCa | f6114c69-71a1-47d5-9b28-b0227b1872f7 | 8  | 124090049 | 124096890 | 168 | 6841  | 1  | 6  | ## | NA | NA | NA |
| Breast-AdenoCa | f6114c69-71a1-47d5-9b28-b0227b1872f7 | 8  | 127632028 | 127633662 | 8   | 1634  | 2  | 4  | 2  | NA | NA | NA |
| Breast-AdenoCa | f6114c69-71a1-47d5-9b28-b0227b1872f7 | 8  | 127645915 | 127647287 | 7   | 1372  | NA | NA | 7  | NA | NA | NA |
| Breast-AdenoCa | f6114c69-71a1-47d5-9b28-b0227b1872f7 | 8  | 128103107 | 128107090 | 8   | 3983  | 1  | 5  | 2  | NA | NA | NA |
| Breast-AdenoCa | f6114c69-71a1-47d5-9b28-b0227b1872f7 | 8  | 136085710 | 136088036 | 12  | 2326  | 2  | 7  | 3  | NA | NA | NA |
| Breast-AdenoCa | f6114c69-71a1-47d5-9b28-b0227b1872f7 | 12 | 92172250  | 92178657  | 10  | 6407  | 1  | 1  | 8  | NA | NA | NA |
| Breast-AdenoCa | f6114c69-71a1-47d5-9b28-b0227b1872f7 | 12 | 97436055  | 97451470  | 22  | 15415 | 3  | 9  | 9  | NA | 1  | NA |
| Breast-AdenoCa | f6114c69-71a1-47d5-9b28-b0227b1872f7 | 17 | 29331757  | 29339786  | 16  | 8029  | NA | 7  | 9  | NA | NA | NA |
| Breast-AdenoCa | f6114c69-71a1-47d5-9b28-b0227b1872f7 | 17 | 38093940  | 38095131  | 11  | 1191  | NA | 3  | 8  | NA | NA | NA |
| Ovary-AdenoCA  | f6189828-eeaa-4d21-b163-53bf3d47a640 | 6  | 93310111  | 93310403  | 6   | 292   | 1  | 1  | 4  | NA | NA | NA |
| Ovary-AdenoCA  | f6189828-eeaa-4d21-b163-53bf3d47a640 | 9  | 38719270  | 38722659  | 14  | 3389  | 4  | 6  | 4  | NA | NA | NA |
| Prost-AdenoCA  | f640d377-98e9-41d3-8761-61eb33072c65 | 1  | 70274483  | 70277149  | 7   | 2666  | 1  | 1  | 4  | NA | 1  | NA |
| Prost-AdenoCA  | f640d377-98e9-41d3-8761-61eb33072c65 | 8  | 112216113 | 112218875 | 6   | 2762  | 1  | NA | NA | 3  | 2  | NA |
| Prost-AdenoCA  | f640d377-98e9-41d3-8761-61eb33072c65 | 8  | 128056636 | 128057546 | 7   | 910   | NA | 2  | 3  | 2  | NA | NA |
| Prost-AdenoCA  | f640d377-98e9-41d3-8761-61eb33072c65 | X  | 66195485  | 66196776  | 6   | 1291  | 1  | 2  | 3  | NA | NA | NA |
| Cervix-SCC     | f658c350-fb89-4268-8a59-a07e365f4221 | 1  | 28277777  | 28281891  | 8   | 4114  | 1  | 4  | 3  | NA | NA | NA |
| Cervix-SCC     | f658c350-fb89-4268-8a59-a07e365f4221 | 2  | 54552214  | 54556331  | 6   | 4117  | NA | 2  | 4  | NA | NA | NA |
| Cervix-SCC     | f658c350-fb89-4268-8a59-a07e365f4221 | 3  | 171148905 | 171152658 | 11  | 3753  | NA | 3  | 8  | NA | NA | NA |
| Cervix-SCC     | f658c350-fb89-4268-8a59-a07e365f4221 | 5  | 76266394  | 76269908  | 7   | 3514  | 2  | 3  | 2  | NA | NA | NA |

|                |                                      |    |           |           |    |      |    |    |    |    |    |    |
|----------------|--------------------------------------|----|-----------|-----------|----|------|----|----|----|----|----|----|
| Cervix-SCC     | f658c350-fb89-4268-8a59-a07e365f4221 | 5  | 180146253 | 180150998 | 7  | 4745 | NA | 2  | 5  | NA | NA | NA |
| Cervix-SCC     | f658c350-fb89-4268-8a59-a07e365f4221 | 8  | 41784279  | 41787966  | 7  | 3687 | 1  | 3  | 3  | NA | NA | NA |
| Cervix-SCC     | f658c350-fb89-4268-8a59-a07e365f4221 | 10 | 79523772  | 79528061  | 6  | 4289 | 1  | 2  | 3  | NA | NA | NA |
| Cervix-SCC     | f658c350-fb89-4268-8a59-a07e365f4221 | 12 | 59836283  | 59840135  | 6  | 3852 | NA | 2  | 4  | NA | NA | NA |
| Cervix-SCC     | f658c350-fb89-4268-8a59-a07e365f4221 | 15 | 36821599  | 36827147  | 7  | 5548 | 1  | 1  | 5  | NA | NA | NA |
| Cervix-SCC     | f658c350-fb89-4268-8a59-a07e365f4221 | 16 | 1701126   | 1704077   | 8  | 2951 | 2  | 4  | 2  | NA | NA | NA |
| Breast-AdenoCa | f69e5057-eda6-4391-ba9a-aedbf6b572da | 4  | 60430381  | 60436313  | 7  | 5932 | 1  | 2  | 4  | NA | NA | NA |
| Breast-AdenoCa | f69e5057-eda6-4391-ba9a-aedbf6b572da | 4  | 61348219  | 61351021  | 12 | 2802 | 5  | 6  | 1  | NA | NA | NA |
| Ovary-AdenoCA  | f6c811ff-f22e-490b-9b23-b527d20e6e6d | 1  | 162397578 | 162400702 | 15 | 3124 | 1  | 11 | 2  | NA | NA | 1  |
| Panc-AdenoCA   | f7702c0c-9636-4700-a8ae-7a58afd9fa71 | 8  | 42101919  | 42107076  | 15 | 5157 | 3  | 4  | 8  | NA | NA | NA |
| Panc-AdenoCA   | f7702c0c-9636-4700-a8ae-7a58afd9fa71 | 8  | 129674205 | 129679788 | 23 | 5583 | NA | 1  | 18 | NA | 4  | NA |
| Panc-AdenoCA   | f7702c0c-9636-4700-a8ae-7a58afd9fa71 | 8  | 130838441 | 130841843 | 12 | 3402 | NA | NA | 12 | NA | NA | NA |
| Panc-AdenoCA   | f7702c0c-9636-4700-a8ae-7a58afd9fa71 | 8  | 142077077 | 142080260 | 22 | 3183 | 1  | 9  | 12 | NA | NA | NA |
| Panc-AdenoCA   | f7702c0c-9636-4700-a8ae-7a58afd9fa71 | 9  | 22079720  | 22080371  | 6  | 651  | 1  | 3  | 2  | NA | NA | NA |
| Panc-AdenoCA   | f7702c0c-9636-4700-a8ae-7a58afd9fa71 | 15 | 50080278  | 50083561  | 6  | 3283 | NA | 1  | 5  | NA | NA | NA |
| Panc-AdenoCA   | f7702c0c-9636-4700-a8ae-7a58afd9fa71 | 19 | 15986833  | 15988724  | 7  | 1891 | 2  | 5  | NA | NA | NA | NA |
| Panc-AdenoCA   | f7702c0c-9636-4700-a8ae-7a58afd9fa71 | 19 | 17024027  | 17024522  | 14 | 495  | NA | NA | 14 | NA | NA | NA |
| Panc-AdenoCA   | f7702c0c-9636-4700-a8ae-7a58afd9fa71 | 22 | 45024769  | 45026625  | 10 | 1856 | NA | 5  | 5  | NA | NA | NA |
| Breast-AdenoCa | f7b84bac-f161-9eee-e040-11ac0c4847ed | 1  | 20093544  | 20097027  | 10 | 3483 | 1  | 6  | 3  | NA | NA | NA |
| Breast-AdenoCa | f7b84bac-f161-9eee-e040-11ac0c4847ed | 6  | 122483441 | 122487520 | 6  | 4079 | 3  | 1  | 2  | NA | NA | NA |
| Breast-AdenoCa | f7b84bac-f161-9eee-e040-11ac0c4847ed | 19 | 9900806   | 9901894   | 7  | 1088 | 1  | 3  | 3  | NA | NA | NA |
| Prost-AdenoCA  | f7cc504a-37c9-45f5-b50d-599c54dca157 | 10 | 124020193 | 124021661 | 7  | 1468 | NA | NA | 1  | 4  | NA | 2  |
| Breast-AdenoCa | f7d70fac-c76f-399e-e040-11ac0c482f9c | 8  | 57846193  | 57848375  | 11 | 2182 | 1  | 3  | 7  | NA | NA | NA |
| Breast-AdenoCa | f7d70fac-c76f-399e-e040-11ac0c482f9c | 9  | 87963650  | 87964617  | 8  | 967  | 1  | 3  | 4  | NA | NA | NA |
| Breast-AdenoCa | f7d70fac-c76f-399e-e040-11ac0c482f9c | 15 | 60206865  | 60211015  | 20 | 4150 | NA | 9  | 11 | NA | NA | NA |
| Breast-AdenoCa | f7d70fac-c76f-399e-e040-11ac0c482f9c | 16 | 51685554  | 51689804  | 8  | 4250 | NA | 4  | 4  | NA | NA | NA |
| Breast-AdenoCa | f7e4a2a8-093d-9e36-e040-11ac0d480c7d | 11 | 15557395  | 15560328  | 18 | 2933 | 2  | 13 | 3  | NA | NA | NA |
| Breast-AdenoCa | f7e7b258-b4b2-e6c5-e040-11ac0d486773 | 3  | 35877013  | 35877243  | 7  | 230  | 1  | 6  | NA | NA | NA | NA |
| Breast-AdenoCa | f7e7b258-b4b2-e6c5-e040-11ac0d486773 | 11 | 79617218  | 79618513  | 7  | 1295 | 2  | 3  | 2  | NA | NA | NA |
| Breast-AdenoCa | f7e7b258-b4b2-e6c5-e040-11ac0d486773 | 11 | 91257219  | 91258146  | 7  | 927  | 1  | 2  | 4  | NA | NA | NA |
| Breast-AdenoCa | f7e7b258-b4b2-e6c5-e040-11ac0d486773 | 12 | 132235547 | 132236239 | 6  | 692  | 1  | 5  | NA | NA | NA | NA |
| Breast-AdenoCa | f7f3e156-0dde-72b9-e040-11ac0d48542c | 1  | 39620780  | 39621785  | 7  | 1005 | 1  | 1  | 5  | NA | NA | NA |
| Breast-AdenoCa | f7f3e156-0dde-72b9-e040-11ac0d48542c | 2  | 2116463   | 2121393   | 9  | 4930 | 1  | 3  | 5  | NA | NA | NA |
| Breast-AdenoCa | f7f3e156-0dde-72b9-e040-11ac0d48542c | 2  | 178232582 | 178236350 | 14 | 3768 | 2  | 6  | 5  | 1  | NA | NA |
| Breast-AdenoCa | f7f3e156-0dde-72b9-e040-11ac0d48542c | 11 | 17222967  | 17227917  | 6  | 4950 | NA | NA | 5  | NA | 1  | NA |
| Breast-AdenoCa | f7f3e156-0dde-72b9-e040-11ac0d48542c | 11 | 17267823  | 17274519  | 8  | 6696 | 1  | 3  | 4  | NA | NA | NA |
| Breast-AdenoCa | f7f3e156-0dde-72b9-e040-11ac0d48542c | 17 | 26764516  | 26765427  | 7  | 911  | NA | 5  | 2  | NA | NA | NA |
| Breast-AdenoCa | f7f3e156-0dde-72b9-e040-11ac0d48542c | 17 | 28242378  | 28248945  | 12 | 6567 | 4  | 4  | 4  | NA | NA | NA |
| Breast-AdenoCa | f7f3e156-0dde-72b9-e040-11ac0d48542c | 17 | 62994469  | 62999876  | 10 | 5407 | 1  | 5  | 4  | NA | NA | NA |
| Breast-AdenoCa | f7f3e156-0dde-72b9-e040-11ac0d48542c | 20 | 29505150  | 29508805  | 7  | 3655 | 1  | 3  | 3  | NA | NA | NA |
| Bone-Osteosarc | f82d213f-9ba5-7b6b-e040-11ac0c486882 | 1  | 87353605  | 87354667  | 6  | 1062 | 1  | 1  | 4  | NA | NA | NA |
| Bone-Osteosarc | f82d213f-9ba5-7b6b-e040-11ac0c486882 | 8  | 2380811   | 2382466   | 6  | 1655 | NA | 2  | 4  | NA | NA | NA |
| Bone-Osteosarc | f82d213f-9ba5-7b6b-e040-11ac0c486882 | 8  | 140402566 | 140412464 | 28 | 9898 | 2  | 6  | 19 | 1  | NA | NA |
| Bone-Osteosarc | f82d213f-9ba5-7b6b-e040-11ac0c486882 | 8  | 142344020 | 142344326 | 8  | 306  | 1  | 1  | 6  | NA | NA | NA |
| Bone-Osteosarc | f82d213f-9ba5-7b6b-e040-11ac0c486882 | 8  | 143115817 | 143116997 | 9  | 1180 | 1  | 3  | 5  | NA | NA | NA |
| Bone-Osteosarc | f82d213f-9ba5-7b6b-e040-11ac0c486882 | 12 | 10618283  | 10618648  | 10 | 365  | NA | 1  | 9  | NA | NA | NA |
| Bone-Osteosarc | f82d213f-bc99-5b1d-e040-11ac0c486880 | 2  | 4468919   | 4470238   | 8  | 1319 | NA | 1  | 7  | NA | NA | NA |
| Bone-Osteosarc | f82d213f-bc99-5b1d-e040-11ac0c486880 | 5  | 30533893  | 30539172  | 7  | 5279 | 1  | 1  | 4  | NA | 1  | NA |
| Bone-Osteosarc | f82d213f-bc99-5b1d-e040-11ac0c486880 | 5  | 39336862  | 39338032  | 8  | 1170 | 1  | 3  | 4  | NA | NA | NA |
| Bone-Osteosarc | f82d213f-bc99-5b1d-e040-11ac0c486880 | 8  | 37886556  | 37887469  | 8  | 913  | 1  | 5  | 2  | NA | NA | NA |
| Bone-Osteosarc | f82d213f-bc99-5b1d-e040-11ac0c486880 | 20 | 60504247  | 60506834  | 6  | 2587 | NA | 1  | 5  | NA | NA | NA |
| Bone-Osteosarc | f82d213f-bc99-5b1d-e040-11ac0c486880 | 21 | 26262766  | 26263483  | 11 | 717  | 2  | 2  | 7  | NA | NA | NA |
| Bone-Osteosarc | f82d213f-caa7-fd59-e040-11ac0d483e46 | 5  | 3427092   | 3431978   | 6  | 4886 | 2  | 1  | 3  | NA | NA | NA |
| Bone-Osteosarc | f82d213f-caa7-fd59-e040-11ac0d483e46 | 5  | 7806116   | 7809129   | 10 | 3013 | NA | 2  | 8  | NA | NA | NA |
| Bone-Osteosarc | f82d213f-caa7-fd59-e040-11ac0d483e46 | 5  | 8613034   | 8614207   | 12 | 1173 | 1  | 1  | 10 | NA | NA | NA |
| Bone-Osteosarc | f82d213f-caa7-fd59-e040-11ac0d483e46 | 5  | 11021360  | 11026780  | 7  | 5420 | 1  | 1  | 5  | NA | NA | NA |
| Bone-Osteosarc | f82d213f-caa7-fd59-e040-11ac0d483e46 | 5  | 15259834  | 15265692  | 7  | 5858 | 2  | 1  | 4  | NA | NA | NA |
| Bone-Osteosarc | f82d213f-caa7-fd59-e040-11ac0d483e46 | 5  | 15809787  | 15810084  | 8  | 297  | NA | 2  | 6  | NA | NA | NA |
| Bone-Osteosarc | f82d213f-caa7-fd59-e040-11ac0d483e46 | 5  | 20553927  | 20556713  | 11 | 2786 | 2  | 5  | 4  | NA | NA | NA |
| Bone-Osteosarc | f82d213f-caa7-fd59-e040-11ac0d483e46 | 5  | 28436749  | 28437437  | 7  | 688  | 1  | 2  | 3  | NA | NA | 1  |

|                |                                      |    |           |           |    |       |    |    |    |    |    |    |
|----------------|--------------------------------------|----|-----------|-----------|----|-------|----|----|----|----|----|----|
| Bone-Osteosarc | f82d213f-caa7-fd59-e040-11ac0d483e46 | 5  | 39165251  | 39170698  | 13 | 5447  | 4  | 2  | 7  | NA | NA | NA |
| Bone-Osteosarc | f82d213f-caa7-fd59-e040-11ac0d483e46 | 5  | 39439147  | 39445932  | 9  | 6785  | 1  | NA | 8  | NA | NA | NA |
| Bone-Osteosarc | f82d213f-caa7-fd59-e040-11ac0d483e46 | 5  | 42500058  | 42500569  | 8  | 511   | NA | 2  | 6  | NA | NA | NA |
| Bone-Osteosarc | f82d213f-caa7-fd59-e040-11ac0d483e46 | 5  | 42527081  | 42527463  | 7  | 382   | 1  | 1  | 5  | NA | NA | NA |
| Bone-Osteosarc | f82d213f-caa7-fd59-e040-11ac0d483e46 | 5  | 45845318  | 45850642  | 17 | 5324  | 1  | 2  | 14 | NA | NA | NA |
| Bone-Osteosarc | f82d213f-caa7-fd59-e040-11ac0d483e46 | 11 | 64163730  | 64165898  | 13 | 2168  | 4  | 2  | 7  | NA | NA | NA |
| Bone-Osteosarc | f82d213f-caa7-fd59-e040-11ac0d483e46 | 12 | 6931335   | 6937383   | 9  | 6048  | 1  | 2  | 6  | NA | NA | NA |
| Bone-Osteosarc | f82d213f-caa7-fd59-e040-11ac0d483e46 | 12 | 11839219  | 11843357  | 11 | 4138  | 1  | 4  | 6  | NA | NA | NA |
| Bone-Osteosarc | f82d213f-caa7-fd59-e040-11ac0d483e46 | 12 | 58238340  | 58240751  | 14 | 2411  | 3  | 2  | 9  | NA | NA | NA |
| Bone-Osteosarc | f82d213f-caa7-fd59-e040-11ac0d483e46 | 12 | 69398938  | 69401309  | 14 | 2371  | NA | 1  | 13 | NA | NA | NA |
| Bone-Osteosarc | f82d213f-caa7-fd59-e040-11ac0d483e46 | 12 | 71115054  | 71127387  | 17 | 12333 | 1  | 6  | 10 | NA | NA | NA |
| Bone-Osteosarc | f82d213f-caa7-fd59-e040-11ac0d483e46 | 12 | 71837517  | 71842732  | 11 | 5215  | 2  | 8  | NA | NA | NA | 1  |
| Bone-Osteosarc | f82d213f-caa7-fd59-e040-11ac0d483e46 | 12 | 79646495  | 79650771  | 11 | 4276  | NA | NA | 11 | NA | NA | NA |
| Bone-Osteosarc | f82d213f-caa7-fd59-e040-11ac0d483e46 | 12 | 90078646  | 90084818  | 16 | 6172  | NA | 6  | 10 | NA | NA | NA |
| Bone-Osteosarc | f82d213f-caa7-fd59-e040-11ac0d483e46 | 12 | 90632523  | 90639084  | 9  | 6561  | NA | 3  | 6  | NA | NA | NA |
| Bone-Osteosarc | f82d213f-caa7-fd59-e040-11ac0d483e46 | 12 | 127800979 | 127802755 | 12 | 1776  | 1  | 5  | 6  | NA | NA | NA |
| Bone-Osteosarc | f82d213f-caa7-fd59-e040-11ac0d483e46 | 12 | 128349412 | 128349853 | 7  | 441   | 1  | 4  | 1  | NA | NA | 1  |
| Bone-Osteosarc | f82d213f-caa7-fd59-e040-11ac0d483e46 | 14 | 106963358 | 106978586 | 17 | 15228 | 3  | NA | 14 | NA | NA | NA |
| Bone-Osteosarc | f82d213f-caa7-fd59-e040-11ac0d483e46 | 16 | 62562574  | 62564109  | 7  | 1535  | NA | 3  | 4  | NA | NA | NA |
| Bone-Osteosarc | f82d213f-caa7-fd59-e040-11ac0d483e46 | 16 | 87191531  | 87191958  | 10 | 427   | NA | NA | 10 | NA | NA | NA |
| Bone-Osteosarc | f82d213f-caa7-fd59-e040-11ac0d483e46 | 18 | 2340396   | 2341092   | 6  | 696   | NA | 4  | 2  | NA | NA | NA |
| Bone-Osteosarc | f82d213f-caa7-fd59-e040-11ac0d483e46 | 18 | 13012351  | 13015067  | 7  | 2716  | 1  | 2  | 4  | NA | NA | NA |
| Bone-Osteosarc | f82d213f-caa7-fd59-e040-11ac0d483e46 | 18 | 22805797  | 22809918  | 7  | 4121  | NA | 1  | 6  | NA | NA | NA |
| Bone-Osteosarc | f82d213f-caa7-fd59-e040-11ac0d483e46 | X  | 18824554  | 18827936  | 10 | 3382  | NA | 3  | 7  | NA | NA | NA |
| Bone-Osteosarc | f82d213f-caa7-fd59-e040-11ac0d483e46 | X  | 21270589  | 21271270  | 12 | 681   | NA | 7  | 4  | NA | NA | 1  |
| Bone-Osteosarc | f82d213f-caa7-fd59-e040-11ac0d483e46 | X  | 41651480  | 41654616  | 12 | 3136  | NA | 7  | 5  | NA | NA | NA |
| Bone-Osteosarc | f82d213f-caa7-fd59-e040-11ac0d483e46 | X  | 48350882  | 48356368  | 14 | 5486  | 2  | 3  | 9  | NA | NA | NA |
| Bone-Osteosarc | f82d2146-70f5-8114-e040-11ac0d483e50 | 1  | 71432634  | 71433625  | 15 | 991   | 2  | 2  | 11 | NA | NA | NA |
| Bone-Osteosarc | f82d2146-70f5-8114-e040-11ac0d483e50 | 2  | 119631030 | 119632106 | 8  | 1076  | 1  | 2  | 5  | NA | NA | NA |
| Bone-Osteosarc | f82d2146-70f5-8114-e040-11ac0d483e50 | 3  | 32995741  | 32998634  | 13 | 2893  | NA | 2  | 11 | NA | NA | NA |
| Bone-Osteosarc | f82d2146-70f5-8114-e040-11ac0d483e50 | 3  | 158205371 | 158213628 | 30 | 8257  | 7  | 6  | 17 | NA | NA | NA |
| Bone-Osteosarc | f82d2146-70f5-8114-e040-11ac0d483e50 | 4  | 10068358  | 10069139  | 6  | 781   | NA | 2  | 4  | NA | NA | NA |
| Bone-Osteosarc | f82d2146-70f5-8114-e040-11ac0d483e50 | 4  | 32846276  | 32860842  | 21 | 14566 | 2  | 2  | 17 | NA | NA | NA |
| Bone-Osteosarc | f82d2146-70f5-8114-e040-11ac0d483e50 | 4  | 37984810  | 37985247  | 8  | 437   | NA | NA | 8  | NA | NA | NA |
| Bone-Osteosarc | f82d2146-70f5-8114-e040-11ac0d483e50 | 4  | 139030382 | 139032961 | 8  | 2579  | 2  | 1  | 5  | NA | NA | NA |
| Bone-Osteosarc | f82d2146-70f5-8114-e040-11ac0d483e50 | 5  | 118171082 | 118171608 | 6  | 526   | 1  | 1  | 4  | NA | NA | NA |
| Bone-Osteosarc | f82d2146-70f5-8114-e040-11ac0d483e50 | 6  | 11379321  | 11381741  | 8  | 2420  | 1  | 2  | 5  | NA | NA | NA |
| Bone-Osteosarc | f82d2146-70f5-8114-e040-11ac0d483e50 | 6  | 16762217  | 16770488  | 20 | 8271  | 3  | 5  | 12 | NA | NA | NA |
| Bone-Osteosarc | f82d2146-70f5-8114-e040-11ac0d483e50 | 6  | 18381873  | 18383467  | 22 | 1594  | 3  | 4  | 15 | NA | NA | NA |
| Bone-Osteosarc | f82d2146-70f5-8114-e040-11ac0d483e50 | 8  | 19714076  | 19718638  | 14 | 4562  | 1  | 1  | 12 | NA | NA | NA |
| Bone-Osteosarc | f82d2146-70f5-8114-e040-11ac0d483e50 | 10 | 1048308   | 1049365   | 7  | 1057  | 1  | 3  | 3  | NA | NA | NA |
| Bone-Osteosarc | f82d2146-70f5-8114-e040-11ac0d483e50 | 12 | 23504733  | 23510018  | 13 | 5285  | NA | 5  | 7  | NA | NA | 1  |
| Bone-Osteosarc | f82d2146-70f5-8114-e040-11ac0d483e50 | 16 | 76686314  | 76688047  | 10 | 1733  | 1  | 6  | 3  | NA | NA | NA |
| Bone-Osteosarc | f82d2146-70f5-8114-e040-11ac0d483e50 | 19 | 8927963   | 8928495   | 13 | 532   | 3  | 4  | 6  | NA | NA | NA |
| Bone-Osteosarc | f82d2146-70f5-8114-e040-11ac0d483e50 | 22 | 22912671  | 22922089  | 33 | 9418  | 2  | 3  | 28 | NA | NA | NA |
| Bone-Osteosarc | f82d2146-70f5-8114-e040-11ac0d483e50 | X  | 69938373  | 69939232  | 6  | 859   | 1  | 1  | 4  | NA | NA | NA |
| Bone-Osteosarc | f82d2146-70f5-8114-e040-11ac0d483e50 | X  | 75758206  | 75760071  | 13 | 1865  | 1  | 5  | 7  | NA | NA | NA |
| Bone-Osteosarc | f82d2146-70f5-8114-e040-11ac0d483e50 | X  | 77678620  | 77679041  | 11 | 421   | 2  | 5  | 4  | NA | NA | NA |
| Bone-Osteosarc | f82d2146-70f5-8114-e040-11ac0d483e50 | X  | 83276204  | 83281064  | 25 | 4860  | 1  | 6  | 18 | NA | NA | NA |
| Bone-Osteosarc | f82d2146-70f5-8114-e040-11ac0d483e50 | X  | 83682065  | 83682547  | 8  | 482   | NA | 5  | 3  | NA | NA | NA |
| Bone-Osteosarc | f82d2146-70f5-8114-e040-11ac0d483e50 | X  | 83755093  | 83756128  | 8  | 1035  | 1  | 5  | 2  | NA | NA | NA |
| Bone-Osteosarc | f82d2146-70f5-8114-e040-11ac0d483e50 | X  | 93721531  | 93723266  | 24 | 1735  | 3  | 4  | 17 | NA | NA | NA |
| Bone-Osteosarc | f82d2146-70f5-8114-e040-11ac0d483e50 | X  | 95382701  | 95389911  | 12 | 7210  | 1  | 4  | 7  | NA | NA | NA |
| Bone-Osteosarc | f82d2146-70f5-8114-e040-11ac0d483e50 | X  | 95417405  | 95418293  | 7  | 888   | NA | 4  | 3  | NA | NA | NA |
| Bone-Osteosarc | f82d2146-70f5-8114-e040-11ac0d483e50 | X  | 101296465 | 101297554 | 14 | 1089  | 3  | 3  | 8  | NA | NA | NA |
| Bone-Osteosarc | f82d2146-70f5-8114-e040-11ac0d483e50 | X  | 130102735 | 130104738 | 12 | 2003  | 3  | 4  | 5  | NA | NA | NA |
| Bone-Osteosarc | f82d2146-70f5-8114-e040-11ac0d483e50 | X  | 131199260 | 131201084 | 15 | 1824  | 2  | 1  | 12 | NA | NA | NA |
| Bone-Osteosarc | f82d2146-70f5-8114-e040-11ac0d483e50 | X  | 131256283 | 131268574 | 26 | 12291 | 6  | 4  | 15 | NA | NA | 1  |
| Bone-Osteosarc | f82d2146-726a-d0e0-e040-11ac0c486888 | 5  | 1797574   | 1802116   | 7  | 4542  | 2  | 4  | 1  | NA | NA | NA |
| Bone-Osteosarc | f82d2146-726a-d0e0-e040-11ac0c486888 | 11 | 102146448 | 102152388 | 7  | 5940  | 1  | 6  | NA | NA | NA | NA |

|                |                                      |    |           |           |    |       |    |    |    |    |    |    |
|----------------|--------------------------------------|----|-----------|-----------|----|-------|----|----|----|----|----|----|
| Bone-Osteosarc | f82d2146-726a-d0e0-e040-11ac0c486888 | 11 | 104349772 | 104361661 | 20 | 11889 | 2  | 8  | 10 | NA | NA | NA |
| Bone-Osteosarc | f82d2146-726a-d0e0-e040-11ac0c486888 | 19 | 31628701  | 31638508  | 13 | 9807  | 4  | 5  | 4  | NA | NA | NA |
| Bone-Osteosarc | f83f1eb8-b2c8-c3d6-e040-11ac0c48261e | 2  | 78631589  | 78636751  | 7  | 5162  | 2  | NA | 1  | 2  | NA | 2  |
| Bone-Osteosarc | f83fc777-5416-c3e9-e040-11ac0d482c8e | 1  | 50597636  | 50600723  | 18 | 3087  | NA | 7  | 10 | 1  | NA | NA |
| Bone-Osteosarc | f83fc777-5416-c3e9-e040-11ac0d482c8e | 1  | 52219782  | 52223714  | 13 | 3932  | NA | 7  | 6  | NA | NA | NA |
| Bone-Osteosarc | f83fc777-5416-c3e9-e040-11ac0d482c8e | 1  | 96225482  | 96231426  | 7  | 5944  | NA | 3  | 3  | 1  | NA | NA |
| Bone-Osteosarc | f83fc777-5416-c3e9-e040-11ac0d482c8e | 2  | 175571946 | 175575156 | 6  | 3210  | 1  | 3  | 2  | NA | NA | NA |
| Bone-Osteosarc | f83fc777-5416-c3e9-e040-11ac0d482c8e | 4  | 88019121  | 88020704  | 10 | 1583  | NA | 4  | 6  | NA | NA | NA |
| Bone-Osteosarc | f83fc777-5416-c3e9-e040-11ac0d482c8e | 5  | 25730652  | 25731270  | 7  | 618   | 3  | NA | 4  | NA | NA | NA |
| Bone-Osteosarc | f83fc777-5416-c3e9-e040-11ac0d482c8e | 15 | 52378051  | 52380501  | 8  | 2450  | NA | 2  | 6  | NA | NA | NA |
| Bone-Osteosarc | f83fc777-5416-c3e9-e040-11ac0d482c8e | 22 | 32919151  | 32920805  | 6  | 1654  | NA | 4  | 2  | NA | NA | NA |
| Bone-Osteosarc | f843ed5c-0336-3d33-e040-11ac0d48478c | 11 | 134929255 | 134931642 | 8  | 2387  | NA | 7  | 1  | NA | NA | NA |
| Bone-Osteosarc | f843ed5c-0336-3d33-e040-11ac0d48478c | 12 | 70786425  | 70791113  | 7  | 4688  | 2  | 2  | 2  | 1  | NA | NA |
| Bone-Osteosarc | f843ed5c-0336-3d33-e040-11ac0d48478c | 19 | 9852796   | 9856182   | 9  | 3386  | NA | 4  | 5  | NA | NA | NA |
| Bone-Osteosarc | f845ebba-8c56-b559-e040-11ac0c4863d5 | 1  | 114169226 | 114170119 | 6  | 893   | NA | 4  | 2  | NA | NA | NA |
| Bone-Osteosarc | f845ebba-8c56-b559-e040-11ac0c4863d5 | 20 | 21202865  | 21206002  | 6  | 3137  | NA | 4  | 2  | NA | NA | NA |
| Breast-AdenoCa | f848b66f-bd9e-4fba-afd4-eb58848d1ef4 | 1  | 41823068  | 41825511  | 6  | 2443  | 2  | 2  | 1  | NA | NA | 1  |
| Bone-Osteosarc | f85397dc-e6e9-4f54-e040-11ac0d48706c | 1  | 176399832 | 176403261 | 9  | 3429  | NA | NA | 9  | NA | NA | NA |
| Bone-Osteosarc | f85397dc-e6e9-4f54-e040-11ac0d48706c | 5  | 119711837 | 119715236 | 6  | 3399  | 2  | 3  | 1  | NA | NA | NA |
| Bone-Osteosarc | f85397dc-e6e9-4f54-e040-11ac0d48706c | 6  | 66519423  | 66520937  | 16 | 1514  | NA | 7  | 9  | NA | NA | NA |
| Bone-Osteosarc | f85397dc-e6e9-4f54-e040-11ac0d48706c | 6  | 73783089  | 73784046  | 7  | 957   | NA | 2  | 5  | NA | NA | NA |
| Bone-Osteosarc | f85397dc-e6e9-4f54-e040-11ac0d48706c | 7  | 106153256 | 106160425 | 17 | 7169  | NA | NA | 17 | NA | NA | NA |
| Bone-Osteosarc | f85397dc-e6e9-4f54-e040-11ac0d48706c | 10 | 72202008  | 72202603  | 8  | 595   | 1  | NA | 7  | NA | NA | NA |
| Bone-Osteosarc | f85397dc-e6e9-4f54-e040-11ac0d48706c | 13 | 25221743  | 25222102  | 12 | 359   | 2  | 3  | 7  | NA | NA | NA |
| Bone-Osteosarc | f85397dc-e6e9-4f54-e040-11ac0d48706c | 16 | 12642136  | 12646513  | 7  | 4377  | 1  | 1  | 5  | NA | NA | NA |
| Bone-Osteosarc | f85397dc-e6e9-4f54-e040-11ac0d48706c | 18 | 41615785  | 41615841  | 6  | 56    | 1  | NA | 5  | NA | NA | NA |
| Bone-Osteosarc | f85397dc-e6e9-4f54-e040-11ac0d48706c | 19 | 823755    | 824090    | 6  | 335   | NA | 1  | 5  | NA | NA | NA |
| Bone-Osteosarc | f85397dc-e6e9-4f54-e040-11ac0d48706c | X  | 74476768  | 74482185  | 13 | 5417  | 1  | 7  | 5  | NA | NA | NA |
| Bone-Osteosarc | f85397dc-e6e9-4f54-e040-11ac0d48706c | X  | 138503904 | 138512208 | 31 | 8304  | 1  | 6  | 24 | NA | NA | NA |
| Bone-Osteosarc | f856fa85-fdb8-c0b0-e040-11ac0d480b4e | 2  | 7070967   | 7074397   | 6  | 3430  | 1  | 3  | 2  | NA | NA | NA |
| Bone-Osteosarc | f856fa85-fdb8-c0b0-e040-11ac0d480b4e | 3  | 85450022  | 85459308  | 26 | 9286  | 3  | 9  | 13 | NA | NA | 1  |
| Bone-Osteosarc | f856fa85-fdb8-c0b0-e040-11ac0d480b4e | 7  | 1565068   | 1572273   | 9  | 7205  | 1  | 2  | 6  | NA | NA | NA |
| Bone-Osteosarc | f856fa85-fdb8-c0b0-e040-11ac0d480b4e | 7  | 21147464  | 21151348  | 27 | 3884  | 9  | 9  | 9  | NA | NA | NA |
| Bone-Osteosarc | f856fa85-fdb8-c0b0-e040-11ac0d480b4e | 8  | 611479    | 613294    | 7  | 1815  | NA | 5  | 2  | NA | NA | NA |
| Bone-Osteosarc | f856fa85-fdb8-c0b0-e040-11ac0d480b4e | 8  | 50701120  | 50706116  | 8  | 4996  | 2  | NA | 6  | NA | NA | NA |
| Bone-Osteosarc | f856fa85-fdb8-c0b0-e040-11ac0d480b4e | 11 | 11202744  | 11205556  | 7  | 2812  | NA | 1  | 6  | NA | NA | NA |
| Bone-Osteosarc | f856fa85-fdb8-c0b0-e040-11ac0d480b4e | 11 | 18702421  | 18703527  | 7  | 1106  | NA | 1  | 6  | NA | NA | NA |
| Bone-Osteosarc | f856fa85-fdb8-c0b0-e040-11ac0d480b4e | 14 | 23018911  | 23021075  | 8  | 2164  | 1  | 5  | 2  | NA | NA | NA |
| Bone-Osteosarc | f856fa85-fdb8-c0b0-e040-11ac0d480b4e | 16 | 65335656  | 65337654  | 16 | 1998  | 2  | 8  | 6  | NA | NA | NA |
| Bone-Osteosarc | f856fa85-fdb8-c0b0-e040-11ac0d480b4e | 19 | 15982868  | 15987260  | 6  | 4392  | NA | 3  | 3  | NA | NA | NA |
| Bone-Osteosarc | f856fa85-fdb8-c0b0-e040-11ac0d480b4e | 19 | 16007752  | 16009840  | 7  | 2088  | NA | 1  | 6  | NA | NA | NA |
| Bone-Osteosarc | f856fa85-fdb8-c0b0-e040-11ac0d480b4e | 19 | 17674541  | 17678083  | 7  | 3542  | NA | 2  | 5  | NA | NA | NA |
| Bone-Osteosarc | f856fa85-fdb8-c0b0-e040-11ac0d480b4e | 19 | 22843114  | 22843970  | 9  | 856   | NA | 5  | 4  | NA | NA | NA |
| Bone-Osteosarc | f856fa85-fdb8-c0b0-e040-11ac0d480b4e | 19 | 42040063  | 42042197  | 7  | 2134  | 2  | 5  | NA | NA | NA | NA |
| Bone-Osteosarc | f856fa85-fdb8-c0b0-e040-11ac0d480b4e | 22 | 28839469  | 28841468  | 11 | 1999  | 2  | 3  | 6  | NA | NA | NA |
| Bone-Osteosarc | f856fa85-fdb8-c0b0-e040-11ac0d480b4e | 22 | 37302967  | 37309955  | 18 | 6988  | 2  | 4  | 12 | NA | NA | NA |
| Bone-Osteosarc | f856fa85-fdb8-c0b0-e040-11ac0d480b4e | Y  | 2893321   | 2893957   | 7  | 636   | NA | 2  | 5  | NA | NA | NA |
| Bone-Osteosarc | f856fa85-fdb8-c0b0-e040-11ac0d480b4e | Y  | 14323293  | 14326240  | 7  | 2947  | 1  | 2  | 4  | NA | NA | NA |
| Bone-Osteosarc | f856fa85-fdb8-c0b0-e040-11ac0d480b4e | Y  | 22745878  | 22749096  | 16 | 3218  | 3  | 6  | 7  | NA | NA | NA |
| Ovary-AdenoCA  | f858d813-f3c5-4ad9-8c20-9f231d6624d8 | 1  | 35060978  | 35063030  | 8  | 2052  | NA | 4  | 4  | NA | NA | NA |
| Ovary-AdenoCA  | f858d813-f3c5-4ad9-8c20-9f231d6624d8 | 1  | 62317902  | 62319741  | 10 | 1839  | 1  | 1  | 8  | NA | NA | NA |
| Ovary-AdenoCA  | f858d813-f3c5-4ad9-8c20-9f231d6624d8 | 1  | 68914849  | 68916576  | 12 | 1727  | 1  | 8  | 3  | NA | NA | NA |
| Ovary-AdenoCA  | f858d813-f3c5-4ad9-8c20-9f231d6624d8 | 3  | 118470655 | 118474837 | 6  | 4182  | 1  | 1  | 4  | NA | NA | NA |
| Ovary-AdenoCA  | f858d813-f3c5-4ad9-8c20-9f231d6624d8 | 6  | 63244256  | 63244558  | 9  | 302   | 3  | 3  | 3  | NA | NA | NA |
| Ovary-AdenoCA  | f858d813-f3c5-4ad9-8c20-9f231d6624d8 | 6  | 67920392  | 67923245  | 8  | 2853  | 1  | 5  | 2  | NA | NA | NA |
| Ovary-AdenoCA  | f858d813-f3c5-4ad9-8c20-9f231d6624d8 | 6  | 72625156  | 72626972  | 7  | 1816  | NA | 5  | 2  | NA | NA | NA |
| Ovary-AdenoCA  | f858d813-f3c5-4ad9-8c20-9f231d6624d8 | 7  | 144471618 | 144475454 | 6  | 3836  | 1  | 4  | 1  | NA | NA | NA |
| Ovary-AdenoCA  | f858d813-f3c5-4ad9-8c20-9f231d6624d8 | 8  | 35023162  | 35024435  | 9  | 1273  | 1  | 2  | 6  | NA | NA | NA |
| Ovary-AdenoCA  | f858d813-f3c5-4ad9-8c20-9f231d6624d8 | 8  | 35522081  | 35522494  | 7  | 413   | 4  | 1  | 1  | NA | 1  | NA |
| Ovary-AdenoCA  | f858d813-f3c5-4ad9-8c20-9f231d6624d8 | 8  | 62875075  | 62876205  | 7  | 1130  | NA | 7  | NA | NA | NA | NA |

|                |                                      |    |           |           |    |       |    |    |    |    |    |    |
|----------------|--------------------------------------|----|-----------|-----------|----|-------|----|----|----|----|----|----|
| Ovary-AdenoCA  | f858d813-f3c5-4ad9-8c20-9f231d6624d8 | 10 | 4625148   | 4629567   | 6  | 4419  | NA | 2  | 3  | 1  | NA | NA |
| Ovary-AdenoCA  | f858d813-f3c5-4ad9-8c20-9f231d6624d8 | 10 | 6525006   | 6532330   | 23 | 7324  | 10 | 8  | 5  | NA | NA | NA |
| Ovary-AdenoCA  | f858d813-f3c5-4ad9-8c20-9f231d6624d8 | 10 | 15322840  | 15327911  | 20 | 5071  | 3  | 9  | 8  | NA | NA | NA |
| Ovary-AdenoCA  | f858d813-f3c5-4ad9-8c20-9f231d6624d8 | 10 | 15511858  | 15515430  | 13 | 3572  | NA | 7  | 6  | NA | NA | NA |
| Ovary-AdenoCA  | f858d813-f3c5-4ad9-8c20-9f231d6624d8 | 10 | 16254175  | 16254847  | 12 | 672   | 4  | 5  | 3  | NA | NA | NA |
| Ovary-AdenoCA  | f858d813-f3c5-4ad9-8c20-9f231d6624d8 | 10 | 21318368  | 21323384  | 10 | 5016  | 2  | 4  | 4  | NA | NA | NA |
| Ovary-AdenoCA  | f858d813-f3c5-4ad9-8c20-9f231d6624d8 | 10 | 31046052  | 31052655  | 11 | 6603  | NA | 6  | 4  | 1  | NA | NA |
| Ovary-AdenoCA  | f858d813-f3c5-4ad9-8c20-9f231d6624d8 | 11 | 63708679  | 63711823  | 10 | 3144  | 1  | 4  | 5  | NA | NA | NA |
| Ovary-AdenoCA  | f858d813-f3c5-4ad9-8c20-9f231d6624d8 | 11 | 134267119 | 134269235 | 9  | 2116  | 2  | 2  | 5  | NA | NA | NA |
| Ovary-AdenoCA  | f858d813-f3c5-4ad9-8c20-9f231d6624d8 | 12 | 9410791   | 9411151   | 6  | 360   | NA | NA | 6  | NA | NA | NA |
| Ovary-AdenoCA  | f858d813-f3c5-4ad9-8c20-9f231d6624d8 | 12 | 32766103  | 32774019  | 12 | 7916  | 5  | 7  | NA | NA | NA | NA |
| Ovary-AdenoCA  | f858d813-f3c5-4ad9-8c20-9f231d6624d8 | 12 | 39445520  | 39451858  | 17 | 6338  | 1  | 11 | 5  | NA | NA | NA |
| Ovary-AdenoCA  | f858d813-f3c5-4ad9-8c20-9f231d6624d8 | 12 | 43068736  | 43070728  | 11 | 1992  | 1  | 7  | 3  | NA | NA | NA |
| Ovary-AdenoCA  | f858d813-f3c5-4ad9-8c20-9f231d6624d8 | 20 | 33959042  | 33961930  | 13 | 2888  | 2  | 7  | 4  | NA | NA | NA |
| Bone-Osteosarc | f8593ac0-9480-22a0-e040-11ac0d48697a | 4  | 45332631  | 45333007  | 6  | 376   | NA | 3  | 1  | 1  | NA | 1  |
| Bone-Osteosarc | f8593ac0-9480-22a0-e040-11ac0d48697a | 21 | 16613291  | 16614971  | 7  | 1680  | NA | 4  | 3  | NA | NA | NA |
| Bone-Osteosarc | f85add3d-e2e6-31f8-e040-11ac0d48479c | 2  | 212884193 | 212887230 | 11 | 3037  | 1  | 6  | 4  | NA | NA | NA |
| Bone-Osteosarc | f85add3d-e2e6-31f8-e040-11ac0d48479c | 6  | 23755453  | 23757756  | 10 | 2303  | 1  | 8  | 1  | NA | NA | NA |
| Bone-Osteosarc | f85add3d-e2e6-31f8-e040-11ac0d48479c | 6  | 106610356 | 106611051 | 10 | 695   | 1  | 5  | 4  | NA | NA | NA |
| Bone-Osteosarc | f85add3d-e2e6-31f8-e040-11ac0d48479c | 10 | 932411    | 936895    | 8  | 4484  | NA | 1  | 6  | 1  | NA | NA |
| Bone-Osteosarc | f85add3d-e2e6-31f8-e040-11ac0d48479c | 10 | 946944    | 948355    | 16 | 1411  | 4  | 6  | 6  | NA | NA | NA |
| Bone-Osteosarc | f85add3d-e2e6-31f8-e040-11ac0d48479c | 13 | 111549956 | 111551055 | 6  | 1099  | 1  | 3  | 1  | NA | NA | 1  |
| Bone-Osteosarc | f85add3d-e2e6-31f8-e040-11ac0d48479c | 16 | 26915136  | 26920271  | 12 | 5135  | 2  | 4  | 5  | NA | NA | 1  |
| Bone-Osteosarc | f85add3d-e2e6-31f8-e040-11ac0d48479c | 20 | 22291327  | 22292396  | 11 | 1069  | 1  | 7  | 3  | NA | NA | NA |
| Bone-Osteosarc | f85add3d-e2e6-31f8-e040-11ac0d48479c | 20 | 24896332  | 24897246  | 13 | 914   | 2  | 3  | 8  | NA | NA | NA |
| Bone-Osteosarc | f85add3d-e2e6-31f8-e040-11ac0d48479c | 20 | 49378074  | 49379872  | 8  | 1798  | 2  | 3  | 3  | NA | NA | NA |
| Bone-Osteosarc | f85add3d-e2e6-31f8-e040-11ac0d48479c | X  | 28191168  | 28192174  | 13 | 1006  | 4  | 4  | 5  | NA | NA | NA |
| Bone-Osteosarc | f86975a2-78a4-ef8c-e040-11ac0c4809da | 1  | 49638282  | 49643539  | 13 | 5257  | NA | 8  | 4  | NA | NA | 1  |
| Bone-Osteosarc | f86975a2-78a4-ef8c-e040-11ac0c4809da | 2  | 99109764  | 99122543  | 14 | 12779 | 2  | 2  | 10 | NA | NA | NA |
| Bone-Osteosarc | f86975a2-78a4-ef8c-e040-11ac0c4809da | 3  | 116610904 | 116612166 | 6  | 1262  | 1  | 1  | 4  | NA | NA | NA |
| Bone-Osteosarc | f86975a2-78a4-ef8c-e040-11ac0c4809da | 5  | 98771637  | 98774057  | 12 | 2420  | 5  | 3  | 4  | NA | NA | NA |
| Bone-Osteosarc | f86975a2-78a4-ef8c-e040-11ac0c4809da | 6  | 55687110  | 55687792  | 8  | 682   | NA | 3  | 5  | NA | NA | NA |
| Bone-Osteosarc | f86975a2-78a4-ef8c-e040-11ac0c4809da | 13 | 23987748  | 23994570  | 16 | 6822  | 2  | 4  | 10 | NA | NA | NA |
| Bone-Osteosarc | f86975a2-78a4-ef8c-e040-11ac0c4809da | 13 | 44467348  | 44467871  | 7  | 523   | NA | 1  | 6  | NA | NA | NA |
| Bone-Osteosarc | f86975a2-78a4-ef8c-e040-11ac0c4809da | 13 | 47193530  | 47194261  | 8  | 731   | NA | 3  | 5  | NA | NA | NA |
| Bone-Osteosarc | f86975a2-78a4-ef8c-e040-11ac0c4809da | 16 | 8917485   | 8921452   | 13 | 3967  | 3  | 6  | 3  | 1  | NA | NA |
| Bone-Osteosarc | f86975a2-78a4-ef8c-e040-11ac0c4809da | 16 | 26114215  | 26115764  | 12 | 1549  | 2  | 4  | 6  | NA | NA | NA |
| Bone-Osteosarc | f86975a2-78a4-ef8c-e040-11ac0c4809da | 17 | 21356966  | 21360788  | 9  | 3822  | 1  | 2  | 6  | NA | NA | NA |
| Bone-Osteosarc | f86975a2-78a4-ef8c-e040-11ac0c4809da | 18 | 19723534  | 19728355  | 7  | 4821  | NA | 3  | 4  | NA | NA | NA |
| Bone-Osteosarc | f86975a2-78a4-ef8c-e040-11ac0c4809da | X  | 72675521  | 72677189  | 15 | 1668  | 6  | 3  | 6  | NA | NA | NA |
| Bone-Osteosarc | f86975a2-78a4-ef8c-e040-11ac0c4809da | X  | 96327135  | 96327937  | 10 | 802   | 1  | 3  | 6  | NA | NA | NA |
| Bone-Osteosarc | f86975a2-78a4-ef8c-e040-11ac0c4809da | X  | 142112030 | 142117057 | 20 | 5027  | 6  | 6  | 8  | NA | NA | NA |
| Bone-Osteosarc | f86ae246-2492-9785-e040-11ac0d4813b0 | 2  | 55069650  | 55071072  | 17 | 1422  | NA | NA | 17 | NA | NA | NA |
| Bone-Osteosarc | f86ae246-2492-9785-e040-11ac0d4813b0 | 5  | 10017008  | 10019203  | 9  | 2195  | NA | NA | 9  | NA | NA | NA |
| Bone-Osteosarc | f86ae246-2492-9785-e040-11ac0d4813b0 | 5  | 10063830  | 10065956  | 8  | 2126  | NA | NA | 8  | NA | NA | NA |
| Bone-Osteosarc | f86ae246-2492-9785-e040-11ac0d4813b0 | 7  | 114955368 | 114959478 | 6  | 4110  | 2  | NA | 4  | NA | NA | NA |
| Bone-Osteosarc | f86ae246-2492-9785-e040-11ac0d4813b0 | 7  | 148085092 | 148089847 | 12 | 4755  | 1  | 7  | 4  | NA | NA | NA |
| Bone-Osteosarc | f86ae246-2492-9785-e040-11ac0d4813b0 | 8  | 53974488  | 53975115  | 6  | 627   | NA | NA | 6  | NA | NA | NA |
| Bone-Osteosarc | f86ae246-2492-9785-e040-11ac0d4813b0 | 8  | 130951354 | 130951578 | 7  | 224   | NA | NA | 7  | NA | NA | NA |
| Bone-Osteosarc | f86ae246-2492-9785-e040-11ac0d4813b0 | 8  | 134748144 | 134752247 | 7  | 4103  | NA | 1  | 6  | NA | NA | NA |
| Bone-Osteosarc | f86ae246-2492-9785-e040-11ac0d4813b0 | 8  | 141183441 | 141188558 | 11 | 5117  | NA | 4  | 7  | NA | NA | NA |
| Bone-Osteosarc | f86ae246-2492-9785-e040-11ac0d4813b0 | 8  | 142250077 | 142255678 | 8  | 5601  | 1  | 4  | 3  | NA | NA | NA |
| Bone-Osteosarc | f86ae246-2492-9785-e040-11ac0d4813b0 | 11 | 98367115  | 98368946  | 7  | 1831  | 1  | 2  | 4  | NA | NA | NA |
| Bone-Osteosarc | f86ae246-2492-9785-e040-11ac0d4813b0 | 13 | 27166909  | 27167770  | 10 | 861   | 2  | NA | 8  | NA | NA | NA |
| Bone-Osteosarc | f86ae246-2492-9785-e040-11ac0d4813b0 | 13 | 30511689  | 30512272  | 16 | 583   | NA | NA | 16 | NA | NA | NA |
| Bone-Osteosarc | f86ae246-2492-9785-e040-11ac0d4813b0 | 13 | 52295777  | 52297227  | 16 | 1450  | NA | NA | 16 | NA | NA | NA |
| Bone-Osteosarc | f86ae246-2492-9785-e040-11ac0d4813b0 | 13 | 75252056  | 75252819  | 7  | 763   | NA | 2  | 5  | NA | NA | NA |
| Bone-Osteosarc | f86ae246-2492-9785-e040-11ac0d4813b0 | 17 | 20446577  | 20451492  | 26 | 4915  | 1  | NA | 25 | NA | NA | NA |
| Bone-Osteosarc | f86ae246-2492-9785-e040-11ac0d4813b0 | 17 | 21294918  | 21299228  | 23 | 4310  | NA | NA | 23 | NA | NA | NA |
| Bone-Osteosarc | f86ae246-2492-9785-e040-11ac0d4813b0 | 17 | 73617590  | 73620709  | 8  | 3119  | 1  | 2  | 5  | NA | NA | NA |



|                |                                      |    |           |           |    |      |    |    |    |    |    |    |
|----------------|--------------------------------------|----|-----------|-----------|----|------|----|----|----|----|----|----|
| Bone-Osteosarc | f86ae246-2492-9785-e040-11ac0d4813b0 | X  | 55761372  | 55763135  | 9  | 1763 | 2  | 5  | 2  | NA | NA | NA |
| Bone-Osteosarc | f86ae246-2492-9785-e040-11ac0d4813b0 | Y  | 17330883  | 17332138  | 6  | 1255 | NA | 5  | 1  | NA | NA | NA |
| Bone-Osteosarc | f86b7e84-7040-c751-e040-11ac0c485675 | 2  | 102609608 | 102611737 | 8  | 2129 | 3  | 4  | 1  | NA | NA | NA |
| Bone-Osteosarc | f86b7e84-7040-c751-e040-11ac0c485675 | 3  | 179880377 | 179882372 | 7  | 1995 | 1  | 2  | 4  | NA | NA | NA |
| Bone-Osteosarc | f86b7e84-7040-c751-e040-11ac0c485675 | 4  | 133829268 | 133834194 | 9  | 4926 | 1  | 1  | 7  | NA | NA | NA |
| Bone-Osteosarc | f86b7e84-7040-c751-e040-11ac0c485675 | 6  | 1391862   | 1396706   | 6  | 4844 | NA | NA | 6  | NA | NA | NA |
| Bone-Osteosarc | f86b7e84-7040-c751-e040-11ac0c485675 | 6  | 1397971   | 1402341   | 16 | 4370 | NA | 1  | 15 | NA | NA | NA |
| Bone-Osteosarc | f86b7e84-7040-c751-e040-11ac0c485675 | 6  | 2545118   | 2553296   | 23 | 8178 | NA | NA | 23 | NA | NA | NA |
| Bone-Osteosarc | f86b7e84-7040-c751-e040-11ac0c485675 | 6  | 22690749  | 22691427  | 14 | 678  | NA | 1  | 13 | NA | NA | NA |
| Bone-Osteosarc | f86b7e84-7040-c751-e040-11ac0c485675 | 6  | 28647875  | 28652711  | 22 | 4836 | NA | NA | 22 | NA | NA | NA |
| Bone-Osteosarc | f86b7e84-7040-c751-e040-11ac0c485675 | 6  | 29177251  | 29181334  | 32 | 4083 | NA | NA | 32 | NA | NA | NA |
| Bone-Osteosarc | f86b7e84-7040-c751-e040-11ac0c485675 | 6  | 29226563  | 29230711  | 23 | 4148 | NA | NA | 23 | NA | NA | NA |
| Bone-Osteosarc | f86b7e84-7040-c751-e040-11ac0c485675 | 6  | 51564493  | 51565971  | 11 | 1478 | 2  | 6  | 2  | NA | 1  | NA |
| Bone-Osteosarc | f86b7e84-7040-c751-e040-11ac0c485675 | 12 | 23113545  | 23114850  | 7  | 1305 | NA | 3  | 3  | NA | NA | 1  |
| Bone-Osteosarc | f86b7e84-7040-c751-e040-11ac0c485675 | 16 | 504443    | 507161    | 7  | 2718 | 2  | 1  | 4  | NA | NA | NA |
| Bone-Osteosarc | f86b7e84-7040-c751-e040-11ac0c485675 | 16 | 29223488  | 29224997  | 7  | 1509 | 1  | 3  | 3  | NA | NA | NA |
| Bone-Osteosarc | f86b7e84-7040-c751-e040-11ac0c485675 | 18 | 3027329   | 3028894   | 8  | 1565 | NA | 3  | 5  | NA | NA | NA |
| Bone-Osteosarc | f86b7e84-7040-c751-e040-11ac0c485675 | 18 | 9729421   | 9730141   | 7  | 720  | NA | 5  | 2  | NA | NA | NA |
| Bone-Osteosarc | f86b7e84-7040-c751-e040-11ac0c485675 | 18 | 19407744  | 19414898  | 18 | 7154 | NA | 9  | 8  | 1  | NA | NA |
| Bone-Osteosarc | f86b7e84-7040-c751-e040-11ac0c485675 | 19 | 52353213  | 52353681  | 6  | 468  | NA | 2  | 4  | NA | NA | NA |
| Bone-Osteosarc | f86b7e84-7040-c751-e040-11ac0c485675 | 22 | 28979575  | 28981738  | 16 | 2163 | NA | NA | 16 | NA | NA | NA |
| Bone-Osteosarc | f86e2d80-911b-7a19-e040-11ac0d486900 | 3  | 89576840  | 89580222  | 13 | 3382 | 1  | 5  | 7  | NA | NA | NA |
| Bone-Osteosarc | f86e2d80-911b-7a19-e040-11ac0d486900 | 3  | 89893322  | 89897221  | 8  | 3899 | NA | 6  | 1  | NA | NA | 1  |
| Bone-Osteosarc | f86e2d80-911b-7a19-e040-11ac0d486900 | 4  | 184718036 | 184718704 | 6  | 668  | NA | NA | 6  | NA | NA | NA |
| Bone-Osteosarc | f86e2d80-911b-7a19-e040-11ac0d486900 | 12 | 40155800  | 40156623  | 7  | 823  | NA | 4  | 3  | NA | NA | NA |
| Bone-Osteosarc | f86e2d80-911b-7a19-e040-11ac0d486900 | 17 | 20559116  | 20561936  | 6  | 2820 | NA | 2  | 3  | 1  | NA | NA |
| Bone-Osteosarc | f86e2d80-911b-7a19-e040-11ac0d486900 | Y  | 16777706  | 16779218  | 6  | 1512 | 1  | 1  | 4  | NA | NA | NA |
| Liver-HCC      | f8733b80-c622-11e3-bf01-24c6515278c0 | 1  | 174809156 | 174809484 | 8  | 328  | 1  | 2  | 5  | NA | NA | NA |
| Liver-HCC      | f8733b80-c622-11e3-bf01-24c6515278c0 | 1  | 199151679 | 199153395 | 7  | 1716 | 3  | 1  | 3  | NA | NA | NA |
| Liver-HCC      | f8733b80-c622-11e3-bf01-24c6515278c0 | 4  | 63880003  | 63881347  | 6  | 1344 | 2  | 3  | 1  | NA | NA | NA |
| Liver-HCC      | f8733b80-c622-11e3-bf01-24c6515278c0 | 5  | 100746002 | 100746986 | 8  | 984  | 1  | NA | NA | 2  | 1  | 4  |
| Liver-HCC      | f8733b80-c622-11e3-bf01-24c6515278c0 | 12 | 31162028  | 31162787  | 13 | 759  | NA | 4  | 9  | NA | NA | NA |
| Liver-HCC      | f8733b80-c622-11e3-bf01-24c6515278c0 | 13 | 104165339 | 104167369 | 7  | 2030 | NA | NA | 3  | 3  | 1  | NA |
| Bone-Osteosarc | f87348df-7186-4c6b-e040-11ac0c482ba9 | 1  | 202824830 | 202832676 | 13 | 7846 | 2  | 4  | 6  | NA | 1  | NA |
| Bone-Osteosarc | f87348df-7186-4c6b-e040-11ac0c482ba9 | 1  | 203106446 | 203111449 | 26 | 5003 | 12 | 8  | 5  | NA | NA | 1  |
| Bone-Osteosarc | f87348df-7186-4c6b-e040-11ac0c482ba9 | 2  | 41294569  | 41300120  | 7  | 5551 | 1  | NA | 6  | NA | NA | NA |
| Bone-Osteosarc | f87348df-7186-4c6b-e040-11ac0c482ba9 | 2  | 41308215  | 41313098  | 9  | 4883 | NA | 2  | 7  | NA | NA | NA |
| Bone-Osteosarc | f87348df-7186-4c6b-e040-11ac0c482ba9 | 2  | 168989671 | 168995607 | 11 | 5936 | 1  | 4  | 6  | NA | NA | NA |
| Bone-Osteosarc | f87348df-7186-4c6b-e040-11ac0c482ba9 | 3  | 42482473  | 42486916  | 11 | 4443 | 6  | 2  | 2  | NA | NA | 1  |
| Bone-Osteosarc | f87348df-7186-4c6b-e040-11ac0c482ba9 | 6  | 91404918  | 91409462  | 7  | 4544 | 1  | 6  | NA | NA | NA | NA |
| Bone-Osteosarc | f87348df-7186-4c6b-e040-11ac0c482ba9 | 10 | 67274177  | 67278087  | 10 | 3910 | 5  | NA | 5  | NA | NA | NA |
| Bone-Osteosarc | f87348df-7186-4c6b-e040-11ac0c482ba9 | 20 | 47908116  | 47908707  | 8  | 591  | NA | 6  | 2  | NA | NA | NA |
| Bone-Osteosarc | f87d7c27-eeef-920e-e040-11ac0d48388d | 3  | 80399037  | 80402062  | 9  | 3025 | NA | 5  | 4  | NA | NA | NA |
| Bone-Osteosarc | f87d7c27-eeef-920e-e040-11ac0d48388d | 3  | 80603449  | 80603975  | 7  | 526  | NA | 4  | 3  | NA | NA | NA |
| Bone-Osteosarc | f87d7c27-eeef-920e-e040-11ac0d48388d | 3  | 82710613  | 82714104  | 9  | 3491 | 1  | 3  | 5  | NA | NA | NA |
| Bone-Osteosarc | f87d7c27-eeef-920e-e040-11ac0d48388d | 3  | 82730035  | 82732401  | 8  | 2366 | NA | 3  | 5  | NA | NA | NA |
| Bone-Osteosarc | f87d7c27-eeef-920e-e040-11ac0d48388d | 4  | 65953167  | 65953474  | 6  | 307  | 1  | 4  | 1  | NA | NA | NA |
| Bone-Osteosarc | f87d7c27-eeef-920e-e040-11ac0d48388d | 6  | 64814951  | 64820737  | 16 | 5786 | 1  | 7  | 8  | NA | NA | NA |
| Bone-Osteosarc | f87d7c27-eeef-920e-e040-11ac0d48388d | 6  | 65637613  | 65638775  | 7  | 1162 | NA | 4  | 3  | NA | NA | NA |
| Bone-Osteosarc | f87d7c27-eeef-920e-e040-11ac0d48388d | 7  | 35717941  | 35719264  | 10 | 1323 | 1  | 5  | 4  | NA | NA | NA |
| Bone-Osteosarc | f87d7c27-eeef-920e-e040-11ac0d48388d | 8  | 105614540 | 105619398 | 11 | 4858 | 3  | 3  | 5  | NA | NA | NA |
| Bone-Osteosarc | f87d7c27-eeef-920e-e040-11ac0d48388d | 8  | 127773344 | 127774076 | 7  | 732  | 1  | 4  | 2  | NA | NA | NA |
| Bone-Osteosarc | f87d7c27-eeef-920e-e040-11ac0d48388d | 8  | 132817604 | 132818901 | 10 | 1297 | NA | 7  | 3  | NA | NA | NA |
| Bone-Osteosarc | f87d7c27-eeef-920e-e040-11ac0d48388d | 11 | 17739450  | 17741086  | 6  | 1636 | NA | 3  | 3  | NA | NA | NA |
| Bone-Osteosarc | f87d7c27-eeef-920e-e040-11ac0d48388d | 11 | 35901735  | 35904753  | 16 | 3018 | 3  | 5  | 8  | NA | NA | NA |
| Bone-Osteosarc | f87d7c27-eeef-920e-e040-11ac0d48388d | 12 | 38831594  | 38832073  | 7  | 479  | 1  | NA | 6  | NA | NA | NA |
| Bone-Osteosarc | f87d7c27-eeef-920e-e040-11ac0d48388d | 12 | 65810827  | 65811365  | 9  | 538  | 2  | 2  | 5  | NA | NA | NA |
| Bone-Osteosarc | f87d7c27-eeef-920e-e040-11ac0d48388d | 12 | 66146964  | 66152243  | 8  | 5279 | NA | 3  | 5  | NA | NA | NA |
| Bone-Osteosarc | f87d7c27-eeef-920e-e040-11ac0d48388d | 12 | 66744322  | 66745977  | 26 | 1655 | 5  | 5  | 16 | NA | NA | NA |
| Bone-Osteosarc | f87d7c27-eeef-920e-e040-11ac0d48388d | 12 | 66807026  | 66808595  | 7  | 1569 | NA | 5  | 2  | NA | NA | NA |

|                |                                      |    |           |           |    |       |    |    |    |    |    |    |
|----------------|--------------------------------------|----|-----------|-----------|----|-------|----|----|----|----|----|----|
| Bone-Osteosarc | f87d7c27-eeef-920e-e040-11ac0d48388d | 12 | 80973050  | 80974000  | 7  | 950   | NA | 1  | 6  | NA | NA | NA |
| Bone-Osteosarc | f87d7c27-eeef-920e-e040-11ac0d48388d | 12 | 83029719  | 83031125  | 10 | 1406  | NA | 5  | 5  | NA | NA | NA |
| Bone-Osteosarc | f87d7c27-eeef-920e-e040-11ac0d48388d | 12 | 86372801  | 86388330  | 20 | 15529 | NA | 3  | 16 | NA | NA | 1  |
| Bone-Osteosarc | f87d7c27-eeef-920e-e040-11ac0d48388d | 12 | 86632868  | 86633367  | 7  | 499   | 2  | 1  | 4  | NA | NA | NA |
| Bone-Osteosarc | f87d7c27-eeef-920e-e040-11ac0d48388d | 12 | 87122427  | 87125269  | 11 | 2842  | 2  | 6  | 3  | NA | NA | NA |
| Bone-Osteosarc | f87d7c27-eeef-920e-e040-11ac0d48388d | 12 | 87685269  | 87724661  | 47 | 39392 | 6  | 13 | 27 | NA | 1  | NA |
| Bone-Osteosarc | f87d7c27-eeef-920e-e040-11ac0d48388d | 12 | 88445843  | 88446503  | 15 | 660   | 2  | 6  | 7  | NA | NA | NA |
| Bone-Osteosarc | f87d7c27-eeef-920e-e040-11ac0d48388d | 12 | 89953667  | 89954316  | 11 | 649   | 2  | 2  | 6  | 1  | NA | NA |
| Bone-Osteosarc | f87d7c27-eeef-920e-e040-11ac0d48388d | 12 | 91275563  | 91276522  | 8  | 959   | NA | 4  | 4  | NA | NA | NA |
| Bone-Osteosarc | f87d7c27-eeef-920e-e040-11ac0d48388d | 12 | 91931438  | 91938083  | 8  | 6645  | NA | 6  | 2  | NA | NA | NA |
| Bone-Osteosarc | f87d7c27-eeef-920e-e040-11ac0d48388d | 12 | 92138809  | 92140221  | 24 | 1412  | 4  | 4  | 16 | NA | NA | NA |
| Bone-Osteosarc | f87d7c27-eeef-920e-e040-11ac0d48388d | 12 | 92865355  | 92870293  | 29 | 4938  | 5  | 15 | 7  | 1  | NA | 1  |
| Bone-Osteosarc | f87d7c27-eeef-920e-e040-11ac0d48388d | 12 | 97657765  | 97659001  | 9  | 1236  | 2  | 1  | 6  | NA | NA | NA |
| Bone-Osteosarc | f87d7c27-eeef-920e-e040-11ac0d48388d | 12 | 97670981  | 97672818  | 8  | 1837  | NA | NA | 8  | NA | NA | NA |
| Bone-Osteosarc | f87d7c27-eeef-920e-e040-11ac0d48388d | 12 | 98245121  | 98245922  | 8  | 801   | 2  | 4  | 2  | NA | NA | NA |
| Bone-Osteosarc | f87d7c27-eeef-920e-e040-11ac0d48388d | 12 | 98331766  | 98334385  | 13 | 2619  | 1  | 3  | 9  | NA | NA | NA |
| Bone-Osteosarc | f87d7c27-eeef-920e-e040-11ac0d48388d | 12 | 109248563 | 109259277 | 19 | 10714 | 3  | 3  | 13 | NA | NA | NA |
| Bone-Osteosarc | f87d7c27-eeef-920e-e040-11ac0d48388d | 12 | 113727030 | 113727698 | 9  | 668   | 1  | NA | 8  | NA | NA | NA |
| Bone-Osteosarc | f87d7c27-eeef-920e-e040-11ac0d48388d | 15 | 58314866  | 58316107  | 9  | 1241  | NA | 1  | 8  | NA | NA | NA |
| Bone-Osteosarc | f87d7c27-eeef-920e-e040-11ac0d48388d | 15 | 87722088  | 87726329  | 26 | 4241  | 2  | 15 | 9  | NA | NA | NA |
| Bone-Osteosarc | f87d7c27-eeef-920e-e040-11ac0d48388d | 17 | 8703682   | 8704908   | 6  | 1226  | NA | 4  | 2  | NA | NA | NA |
| Bone-Osteosarc | f87d7c27-eeef-920e-e040-11ac0d48388d | 17 | 10738939  | 10740344  | 10 | 1405  | 1  | 4  | 5  | NA | NA | NA |
| Bone-Osteosarc | f87d7c27-eeef-920e-e040-11ac0d48388d | 17 | 12768551  | 12772569  | 15 | 4018  | 2  | 9  | 4  | NA | NA | NA |
| Bone-Osteosarc | f87d7c27-eeef-920e-e040-11ac0d48388d | 17 | 19309457  | 19311005  | 11 | 1548  | 1  | 1  | 9  | NA | NA | NA |
| Bone-Osteosarc | f87d7c27-eeef-920e-e040-11ac0d48388d | 19 | 20357459  | 20358111  | 6  | 652   | NA | 1  | 5  | NA | NA | NA |
| Bone-Osteosarc | f87d7c27-eeef-920e-e040-11ac0d48388d | 19 | 23671055  | 23673121  | 7  | 2066  | 1  | 4  | 2  | NA | NA | NA |
| Bone-Osteosarc | f87d7c27-eeef-920e-e040-11ac0d48388d | X  | 65770115  | 65771890  | 8  | 1775  | NA | NA | 8  | NA | NA | NA |
| Bone-Osteosarc | f87eb1b5-1712-ca1f-e040-11ac0c483848 | 4  | 4596189   | 4597430   | 14 | 1241  | 3  | 5  | 6  | NA | NA | NA |
| Bone-Osteosarc | f87eb1b5-1712-ca1f-e040-11ac0c483848 | 9  | 21936556  | 21943574  | 9  | 7018  | 1  | 5  | 3  | NA | NA | NA |
| Bone-Osteosarc | f87eb1b5-1712-ca1f-e040-11ac0c483848 | 16 | 65043650  | 65054454  | 17 | 10804 | NA | 9  | 6  | NA | NA | 2  |
| Myeloid-MPN    | f8e61a02-8c9e-aaee-e040-11ac0d481b6a | 12 | 66350891  | 66353363  | 6  | 2472  | NA | NA | NA | 5  | 1  | NA |
| Breast-AdenoCa | f8f749b7-547d-49fa-9da2-44eed962b6fd | 1  | 23564882  | 23571837  | 10 | 6955  | 1  | 3  | 6  | NA | NA | NA |
| Breast-AdenoCa | f8f749b7-547d-49fa-9da2-44eed962b6fd | 1  | 51478692  | 51483573  | 10 | 4881  | NA | 3  | 7  | NA | NA | NA |
| Breast-AdenoCa | f8f749b7-547d-49fa-9da2-44eed962b6fd | 1  | 115398986 | 115404939 | 7  | 5953  | 1  | 2  | 4  | NA | NA | NA |
| Breast-AdenoCa | f8f749b7-547d-49fa-9da2-44eed962b6fd | 3  | 18950093  | 18954849  | 7  | 4756  | NA | 3  | 3  | NA | NA | 1  |
| Breast-AdenoCa | f8f749b7-547d-49fa-9da2-44eed962b6fd | 4  | 38935148  | 38941206  | 11 | 6058  | NA | 4  | 7  | NA | NA | NA |
| Breast-AdenoCa | f8f749b7-547d-49fa-9da2-44eed962b6fd | 4  | 97794543  | 97797525  | 9  | 2982  | 2  | 3  | 4  | NA | NA | NA |
| Breast-AdenoCa | f8f749b7-547d-49fa-9da2-44eed962b6fd | 4  | 175492644 | 175496121 | 8  | 3477  | 1  | 3  | 4  | NA | NA | NA |
| Breast-AdenoCa | f8f749b7-547d-49fa-9da2-44eed962b6fd | 6  | 24864651  | 24870295  | 9  | 5644  | NA | 5  | 4  | NA | NA | NA |
| Breast-AdenoCa | f8f749b7-547d-49fa-9da2-44eed962b6fd | 6  | 65847891  | 65848132  | 7  | 241   | NA | 3  | 4  | NA | NA | NA |
| Breast-AdenoCa | f8f749b7-547d-49fa-9da2-44eed962b6fd | 9  | 97658180  | 97663004  | 6  | 4824  | 2  | 1  | 3  | NA | NA | NA |
| Breast-AdenoCa | f8f749b7-547d-49fa-9da2-44eed962b6fd | 11 | 69884007  | 69887293  | 6  | 3286  | NA | 2  | 4  | NA | NA | NA |
| Breast-AdenoCa | f8f749b7-547d-49fa-9da2-44eed962b6fd | 12 | 111726668 | 111729770 | 8  | 3102  | NA | 5  | 3  | NA | NA | NA |
| Breast-AdenoCa | f8f749b7-547d-49fa-9da2-44eed962b6fd | 14 | 39360336  | 39371162  | 24 | 10826 | 4  | 5  | 15 | NA | NA | NA |
| Breast-AdenoCa | f8f749b7-547d-49fa-9da2-44eed962b6fd | 14 | 96669938  | 96682225  | 16 | 12287 | 6  | 6  | 4  | NA | NA | NA |
| Breast-AdenoCa | f8f749b7-547d-49fa-9da2-44eed962b6fd | 19 | 49408958  | 49413690  | 6  | 4732  | 2  | 1  | 3  | NA | NA | NA |
| Panc-AdenoCA   | f94c4f69-8119-4eaf-97c1-5106890c14d4 | X  | 33713622  | 33717880  | 10 | 4258  | NA | 6  | 4  | NA | NA | NA |
| Lymph-BNHL     | f9837a56-7244-4846-a63d-266e6a92f168 | 2  | 89158166  | 89161339  | 16 | 3173  | NA | 5  | 7  | 2  | 2  | NA |
| Lymph-BNHL     | f9837a56-7244-4846-a63d-266e6a92f168 | 14 | 106211818 | 106213665 | 18 | 1847  | 1  | 2  | 15 | NA | NA | NA |
| Lymph-BNHL     | f9837a56-7244-4846-a63d-266e6a92f168 | 14 | 106236367 | 106241367 | 34 | 5000  | 3  | 5  | 26 | NA | NA | NA |
| Lymph-BNHL     | f9837a56-7244-4846-a63d-266e6a92f168 | 14 | 106323657 | 106330788 | 64 | 7131  | 4  | 13 | 39 | 6  | NA | 2  |
| Kidney-RCC     | f9a81200-5381-496a-8062-099f9e793618 | 3  | 83857223  | 83859946  | 11 | 2723  | 3  | 5  | 3  | NA | NA | NA |
| Prost-AdenoCA  | f9c0a0d9-5af6-4476-e040-11ac0d4830d3 | 1  | 189561007 | 189561575 | 6  | 568   | NA | 2  | 4  | NA | NA | NA |
| Prost-AdenoCA  | f9c0a0d9-5af6-4476-e040-11ac0d4830d3 | 2  | 155274579 | 155279418 | 7  | 4839  | NA | 1  | 6  | NA | NA | NA |
| Prost-AdenoCA  | f9c26646-d2b0-cf30-e040-11ac0d483918 | 4  | 127490449 | 127490890 | 8  | 441   | NA | 7  | 1  | NA | NA | NA |
| Prost-AdenoCA  | f9c26646-d2b0-cf30-e040-11ac0d483918 | 4  | 130242836 | 130243275 | 7  | 439   | 1  | 2  | 4  | NA | NA | NA |
| Prost-AdenoCA  | f9c26646-d2b0-cf30-e040-11ac0d483918 | 7  | 123703707 | 123706891 | 6  | 3184  | NA | 3  | 3  | NA | NA | NA |
| Prost-AdenoCA  | f9c26646-d2b0-cf30-e040-11ac0d483918 | 8  | 50604195  | 50608498  | 7  | 4303  | 1  | 1  | 5  | NA | NA | NA |
| Prost-AdenoCA  | f9c26646-d2b0-cf30-e040-11ac0d483918 | 12 | 5202907   | 5203861   | 8  | 954   | NA | 3  | 4  | 1  | NA | NA |
| Prost-AdenoCA  | f9c26646-d2b0-cf30-e040-11ac0d483918 | 18 | 882778    | 893427    | 14 | 10649 | 1  | 8  | 5  | NA | NA | NA |

|                  |                                      |    |           |           |     |       |    |    |    |    |    |    |
|------------------|--------------------------------------|----|-----------|-----------|-----|-------|----|----|----|----|----|----|
| Prost-AdenoCA    | f9c3bc8e-dbc4-1ed0-e040-11ac0d4803a9 | 17 | 50054465  | 50057108  | 26  | 2643  | NA | 18 | 8  | NA | NA | NA |
| Prost-AdenoCA    | f9c3eaad-a0d9-8bf8-e040-11ac0d481d8e | 1  | 75400303  | 75405829  | 20  | 5526  | 1  | 12 | 6  | 1  | NA | NA |
| Prost-AdenoCA    | f9c3eaad-a0d9-8bf8-e040-11ac0d481d8e | 2  | 53173378  | 53175548  | 8   | 2170  | NA | 5  | 3  | NA | NA | NA |
| Prost-AdenoCA    | f9c3eaad-a0d9-8bf8-e040-11ac0d481d8e | 4  | 180672607 | 180675115 | 8   | 2508  | NA | 5  | 2  | NA | 1  | NA |
| Prost-AdenoCA    | f9c650e7-9053-78eb-e040-11ac0d4874bb | 1  | 238321024 | 238324485 | 15  | 3461  | 3  | 9  | 3  | NA | NA | NA |
| Prost-AdenoCA    | f9c650e7-9053-78eb-e040-11ac0d4874bb | 1  | 245861126 | 245864167 | 9   | 3041  | 2  | 7  | NA | NA | NA | NA |
| Prost-AdenoCA    | f9c70e38-dd99-3fe2-e040-11ac0d4862f2 | 1  | 205335684 | 205336083 | 7   | 399   | NA | 3  | 4  | NA | NA | NA |
| Lung-AdenoCA     | fa2c3620-7e82-4b12-b135-87986f0f2890 | 8  | 39394220  | 39395208  | 16  | 988   | 3  | 6  | 7  | NA | NA | NA |
| Lung-AdenoCA     | fa2c3620-7e82-4b12-b135-87986f0f2890 | 8  | 77591255  | 77596640  | 7   | 5385  | NA | 3  | 4  | NA | NA | NA |
| Lung-AdenoCA     | fa2c3620-7e82-4b12-b135-87986f0f2890 | 8  | 111856302 | 111856556 | 7   | 254   | NA | 1  | 5  | NA | 1  | NA |
| Lung-AdenoCA     | fa2c3620-7e82-4b12-b135-87986f0f2890 | 8  | 113298890 | 113299812 | 12  | 922   | 2  | 2  | 8  | NA | NA | NA |
| Lung-AdenoCA     | fa2c3620-7e82-4b12-b135-87986f0f2890 | 8  | 115139359 | 115139820 | 9   | 461   | 3  | 3  | 3  | NA | NA | NA |
| Lung-AdenoCA     | fa2c3620-7e82-4b12-b135-87986f0f2890 | 8  | 137992634 | 137993269 | 10  | 635   | 1  | 3  | 6  | NA | NA | NA |
| Lung-AdenoCA     | fa2c3620-7e82-4b12-b135-87986f0f2890 | 8  | 138026013 | 138026397 | 9   | 384   | NA | 3  | 6  | NA | NA | NA |
| Lung-AdenoCA     | fa2c3620-7e82-4b12-b135-87986f0f2890 | 20 | 249404    | 253629    | 21  | 4225  | 2  | 10 | 9  | NA | NA | NA |
| Lymph-BNHL       | fa676301-902f-473f-8313-5bff34ae549a | 2  | 89155725  | 89185693  | 187 | 29968 | 8  | 23 | 53 | 38 | 35 | 30 |
| Lymph-BNHL       | fa676301-902f-473f-8313-5bff34ae549a | 3  | 187461833 | 187464034 | 16  | 2201  | 3  | 3  | 3  | 5  | 1  | 1  |
| Lymph-BNHL       | fa676301-902f-473f-8313-5bff34ae549a | 4  | 34971102  | 34976641  | 8   | 5539  | NA | NA | 1  | 3  | NA | 4  |
| Lymph-BNHL       | fa676301-902f-473f-8313-5bff34ae549a | 4  | 150358745 | 150366952 | 10  | 8207  | 1  | NA | NA | 6  | 1  | 2  |
| Lymph-BNHL       | fa676301-902f-473f-8313-5bff34ae549a | 5  | 146612119 | 146612265 | 6   | 146   | NA | NA | NA | NA | 4  | 2  |
| Lymph-BNHL       | fa676301-902f-473f-8313-5bff34ae549a | 6  | 19492824  | 19493062  | 6   | 238   | 1  | 2  | 1  | 1  | NA | 1  |
| Lymph-BNHL       | fa676301-902f-473f-8313-5bff34ae549a | 6  | 101103386 | 101109972 | 11  | 6586  | NA | NA | 2  | 3  | 2  | 4  |
| Lymph-BNHL       | fa676301-902f-473f-8313-5bff34ae549a | 7  | 110658512 | 110665976 | 10  | 7464  | 1  | 1  | 1  | 4  | 2  | 1  |
| Lymph-BNHL       | fa676301-902f-473f-8313-5bff34ae549a | 9  | 37025361  | 37026786  | 7   | 1425  | NA | 2  | 5  | NA | NA | NA |
| Lymph-BNHL       | fa676301-902f-473f-8313-5bff34ae549a | 9  | 112811392 | 112813240 | 7   | 1848  | 1  | 2  | 4  | NA | NA | NA |
| Lymph-BNHL       | fa676301-902f-473f-8313-5bff34ae549a | 10 | 63809033  | 63813066  | 6   | 4033  | 1  | 2  | 3  | NA | NA | NA |
| Lymph-BNHL       | fa676301-902f-473f-8313-5bff34ae549a | 11 | 21148767  | 21151927  | 6   | 3160  | NA | NA | NA | 2  | 2  | 2  |
| Lymph-BNHL       | fa676301-902f-473f-8313-5bff34ae549a | 14 | 30046443  | 30055542  | 11  | 9099  | 3  | NA | 5  | 1  | NA | 2  |
| Lymph-BNHL       | fa676301-902f-473f-8313-5bff34ae549a | 14 | 106067826 | 106144789 | 94  | 76963 | 24 | 10 | 56 | 1  | 1  | 2  |
| Lymph-BNHL       | fa676301-902f-473f-8313-5bff34ae549a | 14 | 106238334 | 106239095 | 7   | 761   | 3  | 1  | 3  | NA | NA | NA |
| Lymph-BNHL       | fa676301-902f-473f-8313-5bff34ae549a | 14 | 106327255 | 106378032 | 83  | 50777 | 10 | 16 | 28 | 11 | 8  | 10 |
| Lymph-BNHL       | fa676301-902f-473f-8313-5bff34ae549a | 14 | 107170375 | 107178515 | 23  | 8140  | NA | 4  | 6  | 7  | 4  | 2  |
| Lymph-BNHL       | fa676301-902f-473f-8313-5bff34ae549a | 16 | 10971514  | 10974102  | 31  | 2588  | 5  | 4  | 22 | NA | NA | NA |
| Lymph-BNHL       | fa676301-902f-473f-8313-5bff34ae549a | 16 | 11348059  | 11349536  | 9   | 1477  | 1  | 2  | 6  | NA | NA | NA |
| Lymph-BNHL       | fa676301-902f-473f-8313-5bff34ae549a | 16 | 27325860  | 27327276  | 13  | 1416  | 2  | 2  | 9  | NA | NA | NA |
| Lymph-BNHL       | fa676301-902f-473f-8313-5bff34ae549a | 22 | 23222988  | 23231148  | 42  | 8160  | 6  | 7  | 13 | 6  | 5  | 5  |
| Lymph-BNHL       | fa676301-902f-473f-8313-5bff34ae549a | X  | 33145287  | 33146531  | 17  | 1244  | 3  | 3  | 6  | 1  | 4  | NA |
| Lung-AdenoCA     | fa6a60f5-8949-4e01-9435-d3117601627f | 10 | 23984617  | 23988262  | 11  | 3645  | 1  | 4  | 6  | NA | NA | NA |
| Lung-AdenoCA     | fa6a60f5-8949-4e01-9435-d3117601627f | 12 | 24456151  | 24457019  | 11  | 868   | NA | 3  | 8  | NA | NA | NA |
| Lung-AdenoCA     | fa6a60f5-8949-4e01-9435-d3117601627f | 15 | 91642705  | 91643787  | 7   | 1082  | NA | 1  | 6  | NA | NA | NA |
| Lung-AdenoCA     | fa8844f8-c4b6-487a-8187-e30c12a7a453 | 6  | 56989167  | 56990258  | 7   | 1091  | 3  | 3  | 1  | NA | NA | NA |
| Lung-AdenoCA     | fa8844f8-c4b6-487a-8187-e30c12a7a453 | 10 | 53709357  | 53710053  | 8   | 696   | NA | 3  | 5  | NA | NA | NA |
| Lung-AdenoCA     | fa8844f8-c4b6-487a-8187-e30c12a7a453 | 17 | 11977560  | 11983011  | 9   | 5451  | NA | NA | NA | 3  | 5  | 1  |
| Eso-AdenoCa      | fab0be4b-c84a-45cd-a76f-44d9a8bf1846 | 1  | 246309700 | 246310330 | 10  | 630   | 1  | 3  | 6  | NA | NA | NA |
| Eso-AdenoCa      | fab0be4b-c84a-45cd-a76f-44d9a8bf1846 | 3  | 9436070   | 9440371   | 11  | 4301  | 1  | 4  | 6  | NA | NA | NA |
| Eso-AdenoCa      | fab0be4b-c84a-45cd-a76f-44d9a8bf1846 | 7  | 154752831 | 154754529 | 7   | 1698  | 1  | 1  | 5  | NA | NA | NA |
| Eso-AdenoCa      | fab0be4b-c84a-45cd-a76f-44d9a8bf1846 | 11 | 102557285 | 102559308 | 26  | 2023  | 3  | 6  | 17 | NA | NA | NA |
| Eso-AdenoCa      | fab0be4b-c84a-45cd-a76f-44d9a8bf1846 | 13 | 113262796 | 113268747 | 8   | 5951  | 1  | 1  | 4  | NA | NA | 2  |
| Eso-AdenoCa      | fab0be4b-c84a-45cd-a76f-44d9a8bf1846 | 14 | 19041865  | 19044106  | 6   | 2241  | 1  | 1  | 4  | NA | NA | NA |
| Eso-AdenoCa      | fab0be4b-c84a-45cd-a76f-44d9a8bf1846 | 17 | 18887896  | 18892890  | 7   | 4994  | 2  | 3  | 2  | NA | NA | NA |
| Eso-AdenoCa      | fab0be4b-c84a-45cd-a76f-44d9a8bf1846 | 17 | 32010567  | 32015898  | 8   | 5331  | NA | NA | 7  | NA | NA | 1  |
| Eso-AdenoCa      | fab0be4b-c84a-45cd-a76f-44d9a8bf1846 | X  | 22665308  | 22667201  | 7   | 1893  | 2  | NA | 5  | NA | NA | NA |
| Lung-SCC         | fab3d6f4-de1c-4d6c-bdea-ac39a7884657 | 3  | 142560499 | 142567170 | 31  | 6671  | 2  | 9  | 20 | NA | NA | NA |
| Lung-SCC         | fab3d6f4-de1c-4d6c-bdea-ac39a7884657 | 15 | 71592137  | 71599099  | 15  | 6962  | 4  | 2  | 9  | NA | NA | NA |
| Liver-HCC        | fabf1f6c-c622-11e3-bf01-24c6515278c0 | 4  | 168057693 | 168059295 | 6   | 1602  | 2  | 3  | 1  | NA | NA | NA |
| ColoRect-AdenoCA | faff4626-615b-416a-b7a6-9d177dcc94a9 | 3  | 69677837  | 69679310  | 10  | 1473  | 1  | 8  | 1  | NA | NA | NA |
| ColoRect-AdenoCA | faff4626-615b-416a-b7a6-9d177dcc94a9 | 20 | 54271516  | 54271909  | 7   | 393   | 1  | 6  | NA | NA | NA | NA |
| ColoRect-AdenoCA | faff4626-615b-416a-b7a6-9d177dcc94a9 | 20 | 57738289  | 57740123  | 7   | 1834  | 1  | 3  | 2  | NA | 1  | NA |
| Lymph-CLL        | fb74cca4-ac9c-4be0-80e3-e71592f96aae | 14 | 106324760 | 106329920 | 30  | 5160  | 1  | 6  | 16 | 3  | 3  | 1  |
| Lymph-CLL        | fb74cca4-ac9c-4be0-80e3-e71592f96aae | 22 | 23161926  | 23162221  | 7   | 295   | 1  | 1  | 3  | 1  | NA | 1  |

|                  |                                      |    |           |           |    |       |    |    |    |    |    |    |
|------------------|--------------------------------------|----|-----------|-----------|----|-------|----|----|----|----|----|----|
| Head-SCC         | fb8b5ff5-4164-4276-b75b-b0ee6bda7329 | 1  | 28414749  | 28415790  | 6  | 1041  | NA | 4  | 2  | NA | NA | NA |
| Head-SCC         | fb8b5ff5-4164-4276-b75b-b0ee6bda7329 | 2  | 28828906  | 28832563  | 6  | 3657  | NA | 4  | 2  | NA | NA | NA |
| Head-SCC         | fb8b5ff5-4164-4276-b75b-b0ee6bda7329 | 4  | 151429560 | 151431901 | 7  | 2341  | 1  | 3  | 3  | NA | NA | NA |
| Head-SCC         | fb8b5ff5-4164-4276-b75b-b0ee6bda7329 | 7  | 43667013  | 43673622  | 8  | 6609  | NA | 5  | 3  | NA | NA | NA |
| Head-SCC         | fb8b5ff5-4164-4276-b75b-b0ee6bda7329 | 10 | 73639056  | 73642521  | 8  | 3465  | NA | 6  | 2  | NA | NA | NA |
| Head-SCC         | fb8b5ff5-4164-4276-b75b-b0ee6bda7329 | 12 | 122004552 | 122008348 | 12 | 3796  | 1  | NA | 10 | NA | NA | 1  |
| Head-SCC         | fb8b5ff5-4164-4276-b75b-b0ee6bda7329 | 18 | 9964297   | 9967712   | 8  | 3415  | NA | 2  | 6  | NA | NA | NA |
| Head-SCC         | fb8b5ff5-4164-4276-b75b-b0ee6bda7329 | 18 | 34248985  | 34251181  | 7  | 2196  | 1  | 1  | 5  | NA | NA | NA |
| Head-SCC         | fb8b5ff5-4164-4276-b75b-b0ee6bda7329 | 19 | 1095918   | 1099032   | 6  | 3114  | 1  | 1  | 4  | NA | NA | NA |
| Head-SCC         | fb8b5ff5-4164-4276-b75b-b0ee6bda7329 | 19 | 29348140  | 29352629  | 11 | 4489  | 5  | 3  | 3  | NA | NA | NA |
| Head-SCC         | fb8b5ff5-4164-4276-b75b-b0ee6bda7329 | 20 | 23130235  | 23131223  | 6  | 988   | NA | 3  | 3  | NA | NA | NA |
| Breast-AdenoCa   | fb9135d9-2acf-41dd-8552-359e6b8c9470 | 3  | 50156620  | 50157633  | 6  | 1013  | 2  | 2  | 2  | NA | NA | NA |
| Breast-AdenoCa   | fb9135d9-2acf-41dd-8552-359e6b8c9470 | 3  | 54930479  | 54932577  | 7  | 2098  | 2  | 3  | 2  | NA | NA | NA |
| Breast-AdenoCa   | fb9135d9-2acf-41dd-8552-359e6b8c9470 | 3  | 55485610  | 55488586  | 8  | 2976  | 1  | 4  | 3  | NA | NA | NA |
| Breast-AdenoCa   | fb9135d9-2acf-41dd-8552-359e6b8c9470 | 3  | 55930800  | 55936487  | 7  | 5687  | 2  | 3  | 1  | 1  | NA | NA |
| Breast-AdenoCa   | fb9135d9-2acf-41dd-8552-359e6b8c9470 | 3  | 56214523  | 56214746  | 8  | 223   | NA | 4  | 4  | NA | NA | NA |
| Breast-AdenoCa   | fb9135d9-2acf-41dd-8552-359e6b8c9470 | 7  | 19886374  | 19887764  | 12 | 1390  | NA | 8  | 4  | NA | NA | NA |
| Breast-AdenoCa   | fb9135d9-2acf-41dd-8552-359e6b8c9470 | 7  | 52434749  | 52436584  | 11 | 1835  | 1  | 10 | NA | NA | NA | NA |
| Breast-AdenoCa   | fb9135d9-2acf-41dd-8552-359e6b8c9470 | 8  | 13645783  | 13647685  | 10 | 1902  | 3  | 5  | 2  | NA | NA | NA |
| Breast-AdenoCa   | fb9135d9-2acf-41dd-8552-359e6b8c9470 | 8  | 38535779  | 38538096  | 7  | 2317  | NA | 6  | 1  | NA | NA | NA |
| Breast-AdenoCa   | fb9135d9-2acf-41dd-8552-359e6b8c9470 | 8  | 123209429 | 123209871 | 8  | 442   | NA | NA | 8  | NA | NA | NA |
| Breast-AdenoCa   | fb9135d9-2acf-41dd-8552-359e6b8c9470 | 8  | 134462679 | 134463392 | 8  | 713   | NA | NA | 8  | NA | NA | NA |
| Breast-AdenoCa   | fb9135d9-2acf-41dd-8552-359e6b8c9470 | 9  | 31036650  | 31037507  | 10 | 857   | 3  | 5  | 2  | NA | NA | NA |
| Breast-AdenoCa   | fb9135d9-2acf-41dd-8552-359e6b8c9470 | 20 | 30040142  | 30042096  | 7  | 1954  | NA | 4  | 3  | NA | NA | NA |
| Breast-AdenoCa   | fc447d4f-2532-c8ea-e040-11ac0c48469f | 3  | 59037107  | 59041247  | 6  | 4140  | 1  | 1  | 4  | NA | NA | NA |
| Breast-AdenoCa   | fc447d4f-2532-c8ea-e040-11ac0c48469f | 12 | 102824575 | 102831460 | 10 | 6885  | 1  | 1  | 8  | NA | NA | NA |
| Breast-AdenoCa   | fc447d4f-2532-c8ea-e040-11ac0c48469f | 14 | 56368969  | 56371757  | 6  | 2788  | 2  | 3  | 1  | NA | NA | NA |
| Breast-AdenoCa   | fc447d4f-2532-c8ea-e040-11ac0c48469f | 15 | 77632867  | 77642237  | 11 | 9370  | 2  | 3  | 6  | NA | NA | NA |
| Breast-AdenoCa   | fc447d51-cdc2-a180-e040-11ac0c4846a4 | 8  | 61466084  | 61467188  | 13 | 1104  | NA | 6  | 7  | NA | NA | NA |
| Breast-AdenoCa   | fc447d51-cdc2-a180-e040-11ac0c4846a4 | 8  | 117771009 | 117773136 | 16 | 2127  | 1  | 7  | 8  | NA | NA | NA |
| Breast-AdenoCa   | fc447d51-cdc2-a180-e040-11ac0c4846a4 | X  | 110457854 | 110458470 | 10 | 616   | 3  | 1  | 6  | NA | NA | NA |
| Breast-AdenoCa   | fc447d51-cdc2-a180-e040-11ac0c4846a4 | X  | 112447826 | 112448169 | 9  | 343   | 3  | 1  | 5  | NA | NA | NA |
| Breast-AdenoCa   | fc447d53-24d1-c83d-e040-11ac0c4846a6 | 6  | 52985598  | 52987056  | 10 | 1458  | NA | 4  | 6  | NA | NA | NA |
| Breast-AdenoCa   | fc447d53-24d1-c83d-e040-11ac0c4846a6 | 7  | 65881651  | 65885841  | 9  | 4190  | 1  | 3  | 5  | NA | NA | NA |
| Breast-AdenoCa   | fc447d53-24d1-c83d-e040-11ac0c4846a6 | 9  | 138805884 | 138806496 | 9  | 612   | 1  | 4  | 4  | NA | NA | NA |
| Breast-AdenoCa   | fc447d53-24d1-c83d-e040-11ac0c4846a6 | 11 | 77270125  | 77275519  | 11 | 5394  | 3  | 2  | 6  | NA | NA | NA |
| Breast-AdenoCa   | fc447d53-24d1-c83d-e040-11ac0c4846a6 | 12 | 32784973  | 32792158  | 23 | 7185  | NA | 1  | 20 | NA | 2  | NA |
| Breast-AdenoCa   | fc447d53-24d1-c83d-e040-11ac0c4846a6 | 17 | 35351093  | 35352856  | 9  | 1763  | NA | 7  | 2  | NA | NA | NA |
| Breast-AdenoCa   | fc447d55-95d8-0b34-e040-11ac0d483afa | 2  | 99741807  | 99742245  | 7  | 438   | 2  | 1  | 4  | NA | NA | NA |
| Breast-AdenoCa   | fc447d56-0d53-e0c3-e040-11ac0c4846a8 | 1  | 119828198 | 119835398 | 9  | 7200  | 1  | 4  | 4  | NA | NA | NA |
| Breast-AdenoCa   | fc447d56-0d53-e0c3-e040-11ac0c4846a8 | 19 | 36480241  | 36480770  | 7  | 529   | 2  | 3  | 2  | NA | NA | NA |
| Breast-AdenoCa   | fc447d56-0d53-e0c3-e040-11ac0c4846a8 | 20 | 44416621  | 44423386  | 8  | 6765  | 1  | 2  | 4  | 1  | NA | NA |
| ColoRect-AdenoCA | fc453f67-6623-4e8c-b519-0bd79e4d4651 | 2  | 195974742 | 195975361 | 6  | 619   | NA | NA | NA | 4  | 1  | 1  |
| ColoRect-AdenoCA | fc453f67-6623-4e8c-b519-0bd79e4d4651 | 2  | 212830962 | 212837922 | 9  | 6960  | NA | NA | 3  | 2  | 2  | 2  |
| ColoRect-AdenoCA | fc453f67-6623-4e8c-b519-0bd79e4d4651 | 5  | 29864889  | 29866283  | 6  | 1394  | NA | NA | NA | 3  | 2  | 1  |
| ColoRect-AdenoCA | fc453f67-6623-4e8c-b519-0bd79e4d4651 | 13 | 34240049  | 34243906  | 7  | 3857  | NA | NA | 1  | 1  | 5  | NA |
| ColoRect-AdenoCA | fc453f67-6623-4e8c-b519-0bd79e4d4651 | 16 | 64382161  | 64384178  | 8  | 2017  | NA | NA | NA | 3  | 1  | 4  |
| ColoRect-AdenoCA | fc453f67-6623-4e8c-b519-0bd79e4d4651 | X  | 86000280  | 86001883  | 7  | 1603  | NA | NA | NA | 2  | 3  | 2  |
| Breast-AdenoCa   | fc5dc6d8-62d2-76d8-e040-11ac0d4863c3 | 1  | 69373282  | 69377104  | 6  | 3822  | 2  | 4  | NA | NA | NA | NA |
| Breast-AdenoCa   | fc5dc6d8-62d2-76d8-e040-11ac0d4863c3 | 11 | 40329638  | 40331154  | 12 | 1516  | 1  | 5  | 5  | NA | NA | 1  |
| Breast-AdenoCa   | fc5dc6d8-62d2-76d8-e040-11ac0d4863c3 | 13 | 61072718  | 61076094  | 6  | 3376  | 3  | 1  | 2  | NA | NA | NA |
| Breast-AdenoCa   | fc5dc6d8-62d2-76d8-e040-11ac0d4863c3 | 19 | 5374908   | 5379753   | 11 | 4845  | 3  | 5  | 2  | NA | 1  | NA |
| Breast-AdenoCa   | fc5dc6d8-62d2-76d8-e040-11ac0d4863c3 | 19 | 12135450  | 12141565  | 10 | 6115  | 1  | 1  | 7  | 1  | NA | NA |
| Breast-AdenoCa   | fc5dc6d8-62d2-76d8-e040-11ac0d4863c3 | 19 | 38652025  | 38654003  | 7  | 1978  | 2  | 2  | NA | 2  | 1  | NA |
| Breast-AdenoCa   | fc639186-8302-798e-e040-11ac0c4846cc | 12 | 6501813   | 6503793   | 10 | 1980  | 4  | 6  | NA | NA | NA | NA |
| Breast-AdenoCa   | fc63cbab-d27a-5ebb-e040-11ac0c48724f | 16 | 59450103  | 59451279  | 6  | 1176  | NA | 3  | 3  | NA | NA | NA |
| Breast-AdenoCa   | fc68e599-6a40-61dc-e040-11ac0d48700d | 1  | 115552046 | 115552442 | 6  | 396   | 3  | 1  | 2  | NA | NA | NA |
| Breast-AdenoCa   | fc68e599-6a40-61dc-e040-11ac0d48700d | 6  | 279142    | 317535    | 67 | 38393 | 2  | NA | 65 | NA | NA | NA |
| Breast-AdenoCa   | fc68e599-6a40-61dc-e040-11ac0d48700d | 6  | 15872294  | 15876218  | 9  | 3924  | NA | 1  | 8  | NA | NA | NA |
| Breast-AdenoCa   | fc68e599-6a40-61dc-e040-11ac0d48700d | 7  | 66611691  | 66613242  | 7  | 1551  | NA | 4  | 3  | NA | NA | NA |

|                |                                      |    |           |           |    |       |    |    |    |    |    |    |
|----------------|--------------------------------------|----|-----------|-----------|----|-------|----|----|----|----|----|----|
| Breast-AdenoCa | fc68e599-6a40-61dc-e040-11ac0d48700d | 11 | 67458180  | 67458921  | 7  | 741   | 2  | 3  | 2  | NA | NA | NA |
| Breast-AdenoCa | fc68e599-6a40-61dc-e040-11ac0d48700d | 11 | 90274794  | 90277739  | 8  | 2945  | NA | 6  | 2  | NA | NA | NA |
| Breast-AdenoCa | fc68e599-6a40-61dc-e040-11ac0d48700d | 11 | 96614073  | 96615719  | 7  | 1646  | NA | 4  | 3  | NA | NA | NA |
| Breast-AdenoCa | fc68e599-6a40-61dc-e040-11ac0d48700d | 17 | 12247302  | 12248871  | 16 | 1569  | NA | NA | 16 | NA | NA | NA |
| Breast-AdenoCa | fc68e599-6a40-61dc-e040-11ac0d48700d | X  | 16603461  | 16606630  | 12 | 3169  | 2  | 4  | 6  | NA | NA | NA |
| Breast-AdenoCa | fc68e599-6a40-61dc-e040-11ac0d48700d | X  | 102563913 | 102568929 | 14 | 5016  | NA | 8  | 6  | NA | NA | NA |
| Breast-AdenoCa | fc6d77a9-121b-48ab-a899-713c3d1319a2 | 13 | 100715087 | 100717232 | 6  | 2145  | NA | 6  | NA | NA | NA | NA |
| Breast-AdenoCa | fc7eb420-5c13-20bd-e040-11ac0d484574 | 10 | 49723642  | 49726078  | 6  | 2436  | 1  | 3  | 2  | NA | NA | NA |
| Breast-AdenoCa | fc7f8eeb-9c40-123e-e040-11ac0c484061 | 6  | 62984471  | 62985327  | 7  | 856   | 1  | 1  | 5  | NA | NA | NA |
| Breast-AdenoCa | fc7f8eeb-9c40-123e-e040-11ac0c484061 | 7  | 12026202  | 12026933  | 6  | 731   | 2  | 1  | 3  | NA | NA | NA |
| Breast-AdenoCa | fc806c50-2f6e-418d-e040-11ac0d485f01 | 8  | 35379694  | 35380852  | 6  | 1158  | NA | NA | 5  | NA | 1  | NA |
| Breast-AdenoCa | fc8130df-1bc2-c537-e040-11ac0d485de6 | 11 | 66482402  | 66484900  | 10 | 2498  | 3  | 2  | 5  | NA | NA | NA |
| Breast-AdenoCa | fc8130df-1bc2-c537-e040-11ac0d485de6 | 11 | 73226344  | 73230035  | 9  | 3691  | NA | 6  | 3  | NA | NA | NA |
| Breast-AdenoCa | fc8130df-1bc2-c537-e040-11ac0d485de6 | 11 | 75501954  | 75504286  | 19 | 2332  | 1  | 6  | 12 | NA | NA | NA |
| Breast-AdenoCa | fc8130df-1bc2-c537-e040-11ac0d485de6 | 19 | 22273325  | 22274500  | 13 | 1175  | 1  | 7  | 5  | NA | NA | NA |
| Breast-AdenoCa | fc8130df-2d5f-3b53-e040-11ac0d485dee | 17 | 27307347  | 27308452  | 11 | 1105  | NA | NA | 11 | NA | NA | NA |
| Breast-AdenoCa | fc8130df-2d5f-3b53-e040-11ac0d485dee | 19 | 51914452  | 51914673  | 6  | 221   | NA | 2  | 4  | NA | NA | NA |
| Breast-AdenoCa | fc8130df-30a5-3e6a-e040-11ac0d485de2 | 2  | 5232965   | 5241713   | 13 | 8748  | 1  | 4  | 8  | NA | NA | NA |
| Breast-AdenoCa | fc8130df-3225-3f96-e040-11ac0d485dfe | 1  | 28029973  | 28043254  | 28 | 13281 | 3  | 16 | 7  | NA | 2  | NA |
| Breast-AdenoCa | fc8130df-3225-3f96-e040-11ac0d485dfe | 1  | 154162223 | 154174092 | 17 | 11869 | 3  | 8  | 6  | NA | NA | NA |
| Breast-AdenoCa | fc8130df-3225-3f96-e040-11ac0d485dfe | 2  | 138924748 | 138926181 | 6  | 1433  | 1  | 1  | 4  | NA | NA | NA |
| Breast-AdenoCa | fc8130df-3225-3f96-e040-11ac0d485dfe | 3  | 49899588  | 49901488  | 6  | 1900  | 1  | 4  | 1  | NA | NA | NA |
| Breast-AdenoCa | fc8130df-3225-3f96-e040-11ac0d485dfe | 3  | 54478271  | 54483102  | 9  | 4831  | NA | 4  | 4  | NA | 1  | NA |
| Breast-AdenoCa | fc8130df-3225-3f96-e040-11ac0d485dfe | 4  | 82583763  | 82589567  | 7  | 5804  | NA | 1  | 6  | NA | NA | NA |
| Breast-AdenoCa | fc8130df-3225-3f96-e040-11ac0d485dfe | 14 | 72123727  | 72128032  | 7  | 4305  | NA | 3  | 4  | NA | NA | NA |
| Breast-AdenoCa | fc8130df-3225-3f96-e040-11ac0d485dfe | 16 | 52447958  | 52452741  | 6  | 4783  | 1  | 2  | 3  | NA | NA | NA |
| Breast-AdenoCa | fc8130df-3225-3f96-e040-11ac0d485dfe | 17 | 59535349  | 59537310  | 7  | 1961  | NA | 4  | 3  | NA | NA | NA |
| Breast-AdenoCa | fc8130df-3225-3f96-e040-11ac0d485dfe | 17 | 61921784  | 61927088  | 8  | 5304  | NA | 4  | 3  | 1  | NA | NA |
| Breast-AdenoCa | fc8130df-3225-3f96-e040-11ac0d485dfe | 22 | 32737315  | 32742043  | 7  | 4728  | NA | 4  | 3  | NA | NA | NA |
| Breast-AdenoCa | fc8130df-35ac-2304-e040-11ac0d485dda | 3  | 144043313 | 144043943 | 6  | 630   | NA | 4  | 2  | NA | NA | NA |
| Breast-AdenoCa | fc8130df-35ac-2304-e040-11ac0d485dda | 3  | 144225944 | 144227182 | 8  | 1238  | NA | 5  | 3  | NA | NA | NA |
| Breast-AdenoCa | fc8130df-35ac-2304-e040-11ac0d485dda | 8  | 80222130  | 80226319  | 7  | 4189  | NA | 2  | 5  | NA | NA | NA |
| Breast-AdenoCa | fc8130df-35ac-2304-e040-11ac0d485dda | 15 | 90285095  | 90285146  | 6  | 51    | NA | NA | 3  | 2  | 1  | NA |
| Breast-AdenoCa | fc8130df-35ac-2304-e040-11ac0d485dda | 18 | 77764737  | 77770050  | 11 | 5313  | 2  | 7  | 2  | NA | NA | NA |
| Breast-AdenoCa | fc8130df-6bec-7627-e040-11ac0d485e04 | 7  | 6341227   | 6344692   | 6  | 3465  | 1  | 1  | 3  | NA | 1  | NA |
| Breast-AdenoCa | fc8130df-8ec8-5b1e-e040-11ac0d485e06 | 1  | 26473976  | 26475840  | 6  | 1864  | NA | 3  | 3  | NA | NA | NA |
| Breast-AdenoCa | fc8130df-8ec8-5b1e-e040-11ac0d485e06 | 1  | 153580076 | 153586488 | 8  | 6412  | 1  | 2  | 5  | NA | NA | NA |
| Breast-AdenoCa | fc8130df-8ec8-5b1e-e040-11ac0d485e06 | 2  | 23988755  | 23993335  | 6  | 4580  | NA | NA | 5  | NA | NA | 1  |
| Breast-AdenoCa | fc8130df-8ec8-5b1e-e040-11ac0d485e06 | 6  | 139488671 | 139492443 | 6  | 3772  | NA | 1  | 5  | NA | NA | NA |
| Breast-AdenoCa | fc8130df-8ec8-5b1e-e040-11ac0d485e06 | 6  | 139500518 | 139508939 | 10 | 8421  | 2  | 1  | 6  | NA | 1  | NA |
| Breast-AdenoCa | fc8130df-8ec8-5b1e-e040-11ac0d485e06 | 8  | 97489786  | 97495339  | 8  | 5553  | 1  | 2  | 5  | NA | NA | NA |
| Breast-AdenoCa | fc8130df-8ec8-5b1e-e040-11ac0d485e06 | 12 | 101968216 | 101972936 | 6  | 4720  | NA | NA | 6  | NA | NA | NA |
| Breast-AdenoCa | fc8130df-8ec8-5b1e-e040-11ac0d485e06 | 12 | 101999666 | 102021900 | 25 | 22234 | 1  | 6  | 17 | NA | 1  | NA |
| Breast-AdenoCa | fc8130df-8ec8-5b1e-e040-11ac0d485e06 | 13 | 21111936  | 21132876  | 22 | 20940 | 4  | 5  | 12 | NA | 1  | NA |
| Breast-AdenoCa | fc8130df-8ec8-5b1e-e040-11ac0d485e06 | 13 | 21140767  | 21149619  | 20 | 8852  | 6  | 8  | 6  | NA | NA | NA |
| Breast-AdenoCa | fc8130df-8ec8-5b1e-e040-11ac0d485e06 | 13 | 21196370  | 21242759  | 71 | 46389 | 14 | 19 | 38 | NA | NA | NA |
| Breast-AdenoCa | fc8130df-8ec8-5b1e-e040-11ac0d485e06 | 14 | 95753049  | 95755512  | 8  | 2463  | 1  | 2  | 5  | NA | NA | NA |
| Breast-AdenoCa | fc8130df-8ec8-5b1e-e040-11ac0d485e06 | 16 | 1398352   | 1402690   | 6  | 4338  | NA | NA | 6  | NA | NA | NA |
| Breast-AdenoCa | fc8130df-8ec8-5b1e-e040-11ac0d485e06 | 20 | 35670550  | 35674156  | 6  | 3606  | NA | 1  | 4  | NA | 1  | NA |
| Breast-AdenoCa | fc8130df-90ba-5d94-e040-11ac0d485e0c | 1  | 62202020  | 62202979  | 6  | 959   | NA | 1  | 5  | NA | NA | NA |
| Breast-AdenoCa | fc8130df-90ba-5d94-e040-11ac0d485e0c | 6  | 163931561 | 163931872 | 6  | 311   | NA | 3  | 3  | NA | NA | NA |
| Breast-AdenoCa | fc8130df-90ba-5d94-e040-11ac0d485e0c | 18 | 56574936  | 56577055  | 7  | 2119  | 3  | 2  | 2  | NA | NA | NA |
| Breast-AdenoCa | fc8130df-e399-e34d-e040-11ac0c483279 | 1  | 8976832   | 8982950   | 9  | 6118  | 1  | 1  | 7  | NA | NA | NA |
| Breast-AdenoCa | fc8130df-e399-e34d-e040-11ac0c483279 | 1  | 117637594 | 117641846 | 10 | 4252  | 1  | 7  | 2  | NA | NA | NA |
| Breast-AdenoCa | fc8130df-e399-e34d-e040-11ac0c483279 | 1  | 152037084 | 152042446 | 7  | 5362  | 2  | 1  | 4  | NA | NA | NA |
| Breast-AdenoCa | fc8130df-e399-e34d-e040-11ac0c483279 | 1  | 225418014 | 225421412 | 7  | 3398  | 1  | 1  | 4  | NA | NA | 1  |
| Breast-AdenoCa | fc8130df-e399-e34d-e040-11ac0c483279 | 2  | 25726008  | 25730707  | 7  | 4699  | NA | 4  | 3  | NA | NA | NA |
| Breast-AdenoCa | fc8130df-e399-e34d-e040-11ac0c483279 | 3  | 125983733 | 126002800 | 24 | 19067 | 2  | 8  | 13 | NA | 1  | NA |
| Breast-AdenoCa | fc8130df-e399-e34d-e040-11ac0c483279 | 4  | 65781986  | 65783222  | 6  | 1236  | 1  | 3  | 2  | NA | NA | NA |
| Breast-AdenoCa | fc8130df-e399-e34d-e040-11ac0c483279 | 9  | 19568373  | 19574775  | 9  | 6402  | 2  | 1  | 6  | NA | NA | NA |

|                  |                                      |    |           |           |    |       |    |    |    |    |    |    |
|------------------|--------------------------------------|----|-----------|-----------|----|-------|----|----|----|----|----|----|
| Breast-AdenoCa   | fc8130df-e399-e34d-e040-11ac0c483279 | 11 | 19487614  | 19489216  | 7  | 1602  | NA | 2  | 5  | NA | NA | NA |
| Breast-AdenoCa   | fc8130df-e399-e34d-e040-11ac0c483279 | 12 | 133451099 | 133455615 | 6  | 4516  | NA | 3  | 3  | NA | NA | NA |
| Breast-AdenoCa   | fc8130df-e399-e34d-e040-11ac0c483279 | 16 | 75026764  | 75030117  | 7  | 3353  | 1  | 1  | 5  | NA | NA | NA |
| Breast-AdenoCa   | fc8130df-e399-e34d-e040-11ac0c483279 | X  | 67700861  | 67703750  | 6  | 2889  | 2  | 1  | 3  | NA | NA | NA |
| Breast-AdenoCa   | fc8130e0-08dd-b996-e040-11ac0c48327b | 1  | 168586139 | 168588546 | 19 | 2407  | 1  | 7  | 9  | NA | 2  | NA |
| Breast-AdenoCa   | fc8130e0-08dd-b996-e040-11ac0c48327b | 6  | 145760350 | 145764106 | 9  | 3756  | 1  | 5  | 3  | NA | NA | NA |
| Breast-AdenoCa   | fc8130e0-08dd-b996-e040-11ac0c48327b | 6  | 162597509 | 162606158 | 22 | 8649  | 6  | 8  | 7  | NA | NA | 1  |
| Breast-AdenoCa   | fc8130e0-08dd-b996-e040-11ac0c48327b | 16 | 86088144  | 86089331  | 11 | 1187  | 3  | 4  | 4  | NA | NA | NA |
| Breast-AdenoCa   | fc8130e0-08dd-b996-e040-11ac0c48327b | 17 | 51294154  | 51298344  | 19 | 4190  | NA | 15 | 4  | NA | NA | NA |
| Breast-AdenoCa   | fc8130e0-08dd-b996-e040-11ac0c48327b | 20 | 52956709  | 52958338  | 11 | 1629  | NA | 5  | 6  | NA | NA | NA |
| Breast-AdenoCa   | fc8130e0-09f1-b964-e040-11ac0c48326e | 12 | 57310568  | 57314199  | 10 | 3631  | NA | NA | 10 | NA | NA | NA |
| Breast-AdenoCa   | fc8130e0-09f1-b964-e040-11ac0c48326e | 20 | 48834365  | 48835273  | 9  | 908   | NA | 3  | 6  | NA | NA | NA |
| Breast-AdenoCa   | fc8130e0-09f1-b964-e040-11ac0c48326e | 20 | 50292063  | 50294965  | 7  | 2902  | NA | 4  | 2  | NA | NA | 1  |
| Breast-AdenoCa   | fc8130e0-0e1f-b54d-e040-11ac0c48326c | 2  | 240858422 | 240861138 | 11 | 2716  | 1  | 1  | 9  | NA | NA | NA |
| Breast-AdenoCa   | fc8130e0-0e1f-b54d-e040-11ac0c48326c | 6  | 134604111 | 134605190 | 6  | 1079  | NA | 1  | 5  | NA | NA | NA |
| Breast-AdenoCa   | fc8130e0-0e1f-b54d-e040-11ac0c48326c | 7  | 149253034 | 149254820 | 13 | 1786  | 2  | NA | 11 | NA | NA | NA |
| Breast-AdenoCa   | fc8130e0-0e1f-b54d-e040-11ac0c48326c | 8  | 10599726  | 10601443  | 10 | 1717  | 1  | 2  | 7  | NA | NA | NA |
| Breast-AdenoCa   | fc8130e0-0e1f-b54d-e040-11ac0c48326c | 8  | 14642164  | 14644423  | 8  | 2259  | NA | 2  | 6  | NA | NA | NA |
| Breast-AdenoCa   | fc8130e0-0e1f-b54d-e040-11ac0c48326c | 8  | 22027312  | 22034639  | 18 | 7327  | 1  | 8  | 9  | NA | NA | NA |
| Breast-AdenoCa   | fc8130e0-0e1f-b54d-e040-11ac0c48326c | 9  | 17470223  | 17470995  | 9  | 772   | NA | 4  | 5  | NA | NA | NA |
| Breast-AdenoCa   | fc8130e0-0e1f-b54d-e040-11ac0c48326c | 9  | 33375442  | 33377199  | 9  | 1757  | NA | 2  | 7  | NA | NA | NA |
| Breast-AdenoCa   | fc8130e0-0e1f-b54d-e040-11ac0c48326c | 10 | 81071857  | 81076836  | 11 | 4979  | NA | 7  | 4  | NA | NA | NA |
| Breast-AdenoCa   | fc8130e0-0e1f-b54d-e040-11ac0c48326c | 10 | 96617662  | 96621508  | 18 | 3846  | 2  | 5  | 11 | NA | NA | NA |
| Breast-AdenoCa   | fc8130e0-0e1f-b54d-e040-11ac0c48326c | 11 | 80807745  | 80808511  | 7  | 766   | NA | 4  | 3  | NA | NA | NA |
| Breast-AdenoCa   | fc8130e0-0e1f-b54d-e040-11ac0c48326c | 12 | 20184145  | 20186040  | 17 | 1895  | 2  | 9  | 6  | NA | NA | NA |
| Breast-AdenoCa   | fc8130e0-0e1f-b54d-e040-11ac0c48326c | 12 | 68289801  | 68292462  | 20 | 2661  | NA | 11 | 9  | NA | NA | NA |
| Breast-AdenoCa   | fc8130e0-0e1f-b54d-e040-11ac0c48326c | 13 | 111127909 | 111132309 | 7  | 4400  | NA | NA | 7  | NA | NA | NA |
| Breast-AdenoCa   | fc8130e0-0e1f-b54d-e040-11ac0c48326c | 20 | 55911779  | 55914197  | 11 | 2418  | NA | 3  | 8  | NA | NA | NA |
| Breast-AdenoCa   | fc8130e0-0e1f-b54d-e040-11ac0c48326c | 20 | 57691678  | 57693528  | 10 | 1850  | NA | NA | 10 | NA | NA | NA |
| Breast-AdenoCa   | fc8130e0-0e1f-b54d-e040-11ac0c48326c | 21 | 25677207  | 25677727  | 8  | 520   | 1  | 6  | 1  | NA | NA | NA |
| Breast-AdenoCa   | fc8130e0-0e1f-b54d-e040-11ac0c48326c | 21 | 25755740  | 25756298  | 7  | 558   | 1  | NA | 6  | NA | NA | NA |
| Breast-AdenoCa   | fc8130e0-0e1f-b54d-e040-11ac0c48326c | 22 | 19812919  | 19813376  | 8  | 457   | 2  | 2  | 4  | NA | NA | NA |
| Breast-AdenoCa   | fc8130e0-0f1a-b6eb-e040-11ac0c48328f | 4  | 75977965  | 75978697  | 6  | 732   | NA | 4  | 2  | NA | NA | NA |
| Breast-AdenoCa   | fc8130e0-0f1a-b6eb-e040-11ac0c48328f | 8  | 118272055 | 118273856 | 10 | 1801  | 1  | 6  | 2  | NA | 1  | NA |
| Breast-AdenoCa   | fc8130e0-0f1a-b6eb-e040-11ac0c48328f | 10 | 52005185  | 52005762  | 10 | 577   | NA | 5  | 5  | NA | NA | NA |
| Breast-AdenoCa   | fc8130e0-0f1a-b6eb-e040-11ac0c48328f | 10 | 56400787  | 56401253  | 7  | 466   | NA | 2  | 5  | NA | NA | NA |
| Breast-AdenoCa   | fc8130e0-0f1a-b6eb-e040-11ac0c48328f | 10 | 59368185  | 59381661  | 23 | 13476 | NA | 8  | 15 | NA | NA | NA |
| Breast-AdenoCa   | fc8130e0-0f1a-b6eb-e040-11ac0c48328f | 10 | 69623882  | 69624850  | 10 | 968   | 4  | 3  | 3  | NA | NA | NA |
| Breast-AdenoCa   | fc8130e0-0f1a-b6eb-e040-11ac0c48328f | 10 | 69845843  | 69847269  | 15 | 1426  | 2  | 5  | 8  | NA | NA | NA |
| Breast-AdenoCa   | fc8130e0-0f1a-b6eb-e040-11ac0c48328f | 10 | 69868069  | 69870965  | 10 | 2896  | 1  | 5  | 4  | NA | NA | NA |
| Breast-AdenoCa   | fc8130e0-0f1a-b6eb-e040-11ac0c48328f | 10 | 71745484  | 71748161  | 10 | 2677  | 1  | 5  | 4  | NA | NA | NA |
| Breast-AdenoCa   | fc8130e0-0f1a-b6eb-e040-11ac0c48328f | 19 | 53019556  | 53020211  | 6  | 655   | 1  | 4  | 1  | NA | NA | NA |
| Breast-LobularCa | fc8130e0-a38a-23b9-e040-11ac0c48327f | 4  | 61800476  | 61802159  | 9  | 1683  | NA | 8  | 1  | NA | NA | NA |
| Breast-LobularCa | fc8130e0-a38a-23b9-e040-11ac0c48327f | 4  | 81641422  | 81642358  | 9  | 936   | NA | 4  | 5  | NA | NA | NA |
| Breast-LobularCa | fc8130e0-a38a-23b9-e040-11ac0c48327f | 5  | 76703988  | 76704931  | 7  | 943   | 2  | 2  | 3  | NA | NA | NA |
| Breast-LobularCa | fc8130e0-a38a-23b9-e040-11ac0c48327f | 7  | 107756198 | 107758593 | 8  | 2395  | 1  | NA | 7  | NA | NA | NA |
| Breast-LobularCa | fc8130e0-a38a-23b9-e040-11ac0c48327f | 7  | 109420968 | 109421906 | 12 | 938   | 1  | 3  | 8  | NA | NA | NA |
| Breast-LobularCa | fc8130e0-a38a-23b9-e040-11ac0c48327f | 7  | 110046807 | 110049625 | 7  | 2818  | NA | 2  | 5  | NA | NA | NA |
| Breast-LobularCa | fc8130e0-a38a-23b9-e040-11ac0c48327f | 7  | 110937485 | 110938555 | 9  | 1070  | NA | 2  | 7  | NA | NA | NA |
| Breast-LobularCa | fc8130e0-a38a-23b9-e040-11ac0c48327f | 7  | 111286090 | 111287121 | 9  | 1031  | NA | 2  | 7  | NA | NA | NA |
| Breast-LobularCa | fc8130e0-a38a-23b9-e040-11ac0c48327f | 14 | 43574779  | 43575139  | 6  | 360   | NA | 1  | 5  | NA | NA | NA |
| Breast-LobularCa | fc8130e0-a38a-23b9-e040-11ac0c48327f | 17 | 11661461  | 11661814  | 11 | 353   | 1  | 2  | 8  | NA | NA | NA |
| Breast-LobularCa | fc8130e0-a38a-23b9-e040-11ac0c48327f | 17 | 22105667  | 22107071  | 19 | 1404  | 1  | 5  | 13 | NA | NA | NA |
| Breast-AdenoCa   | fc8130e0-a538-dda3-e040-11ac0c483264 | 8  | 43623549  | 43624586  | 7  | 1037  | NA | 4  | 3  | NA | NA | NA |
| Breast-AdenoCa   | fc8130e0-a538-dda3-e040-11ac0c483264 | 8  | 68095267  | 68097779  | 7  | 2512  | NA | 3  | 4  | NA | NA | NA |
| Breast-AdenoCa   | fc8130e0-a538-dda3-e040-11ac0c483264 | 10 | 42392062  | 42392888  | 6  | 826   | 1  | 3  | 2  | NA | NA | NA |
| Breast-AdenoCa   | fc8130e0-a538-dda3-e040-11ac0c483264 | 10 | 79958416  | 79959543  | 8  | 1127  | 1  | 2  | 5  | NA | NA | NA |
| Breast-AdenoCa   | fc8130e0-a538-dda3-e040-11ac0c483264 | 15 | 97351994  | 97354064  | 7  | 2070  | 2  | 5  | NA | NA | NA | NA |
| Breast-AdenoCa   | fc8130e0-a538-dda3-e040-11ac0c483264 | 16 | 2391347   | 2395932   | 6  | 4585  | 2  | 1  | 3  | NA | NA | NA |
| Breast-AdenoCa   | fc8130e0-a538-dda3-e040-11ac0c483264 | 17 | 51817235  | 51822158  | 7  | 4923  | NA | 2  | 5  | NA | NA | NA |

|                |                                      |    |           |           |    |       |    |    |    |    |    |    |
|----------------|--------------------------------------|----|-----------|-----------|----|-------|----|----|----|----|----|----|
| Breast-AdenoCa | fc8130e0-a538-dda3-e040-11ac0c483264 | 17 | 70628569  | 70629755  | 8  | 1186  | NA | NA | 8  | NA | NA | NA |
| Breast-AdenoCa | fc8130e0-a538-dda3-e040-11ac0c483264 | 19 | 20004722  | 20005837  | 6  | 1115  | NA | 5  | 1  | NA | NA | NA |
| Breast-AdenoCa | fc8130e0-a538-dda3-e040-11ac0c483264 | 20 | 20689480  | 20690643  | 10 | 1163  | NA | NA | 10 | NA | NA | NA |
| Breast-AdenoCa | fc8130e0-a539-dda8-e040-11ac0c48326a | 6  | 38861121  | 38861490  | 7  | 369   | 2  | 1  | 4  | NA | NA | NA |
| Breast-AdenoCa | fc8130e0-a539-dda8-e040-11ac0c48326a | 6  | 39168198  | 39179275  | 26 | 11077 | 2  | 8  | 16 | NA | NA | NA |
| Breast-AdenoCa | fc8130e0-a539-dda8-e040-11ac0c48326a | 6  | 42230460  | 42231908  | 9  | 1448  | 1  | 5  | 3  | NA | NA | NA |
| Breast-AdenoCa | fc8130e0-a539-dda8-e040-11ac0c48326a | 6  | 48141010  | 48141952  | 13 | 942   | 1  | 7  | 5  | NA | NA | NA |
| Breast-AdenoCa | fc8130e0-a539-dda8-e040-11ac0c48326a | 6  | 82339266  | 82339897  | 12 | 631   | NA | 4  | 8  | NA | NA | NA |
| Breast-AdenoCa | fc8130e0-a539-dda8-e040-11ac0c48326a | 17 | 11012730  | 11014409  | 7  | 1679  | 1  | 2  | 4  | NA | NA | NA |
| Breast-AdenoCa | fc8130e0-a539-dda8-e040-11ac0c48326a | 18 | 23059817  | 23060880  | 8  | 1063  | NA | 6  | 2  | NA | NA | NA |
| Breast-AdenoCa | fc8130e0-a774-d834-e040-11ac0c483268 | 2  | 4097248   | 4100387   | 10 | 3139  | 2  | 4  | 4  | NA | NA | NA |
| Breast-AdenoCa | fc8130e0-a774-d834-e040-11ac0c483268 | 2  | 40135202  | 40146569  | 22 | 11367 | 3  | 12 | 7  | NA | NA | NA |
| Breast-AdenoCa | fc8130e0-a774-d834-e040-11ac0c483268 | 2  | 41107355  | 41111378  | 14 | 4023  | NA | 9  | 5  | NA | NA | NA |
| Breast-AdenoCa | fc8130e0-a774-d834-e040-11ac0c483268 | 2  | 125375005 | 125380840 | 7  | 5835  | NA | 1  | 6  | NA | NA | NA |
| Breast-AdenoCa | fc8130e0-a774-d834-e040-11ac0c483268 | 2  | 193107981 | 193113644 | 7  | 5663  | 2  | 2  | 3  | NA | NA | NA |
| Breast-AdenoCa | fc8130e0-a774-d834-e040-11ac0c483268 | 6  | 3658937   | 3659704   | 10 | 767   | 3  | 2  | 5  | NA | NA | NA |
| Breast-AdenoCa | fc8130e0-a774-d834-e040-11ac0c483268 | 7  | 94764266  | 94766353  | 8  | 2087  | 3  | NA | 5  | NA | NA | NA |
| Breast-AdenoCa | fc8130e0-a774-d834-e040-11ac0c483268 | 7  | 111119021 | 111123520 | 7  | 4499  | 1  | 4  | 2  | NA | NA | NA |
| Breast-AdenoCa | fc8130e0-a774-d834-e040-11ac0c483268 | 7  | 136524240 | 136531639 | 13 | 7399  | NA | 7  | 6  | NA | NA | NA |
| Breast-AdenoCa | fc8130e0-a774-d834-e040-11ac0c483268 | 8  | 93026675  | 93030030  | 6  | 3355  | 1  | 3  | 2  | NA | NA | NA |
| Breast-AdenoCa | fc8130e0-a774-d834-e040-11ac0c483268 | 8  | 98347475  | 98353562  | 13 | 6087  | 2  | 4  | 7  | NA | NA | NA |
| Breast-AdenoCa | fc8130e0-a774-d834-e040-11ac0c483268 | 8  | 115601754 | 115605908 | 8  | 4154  | NA | 3  | 5  | NA | NA | NA |
| Breast-AdenoCa | fc8130e0-a774-d834-e040-11ac0c483268 | 8  | 115909875 | 115914624 | 7  | 4749  | NA | 3  | 4  | NA | NA | NA |
| Breast-AdenoCa | fc8130e0-a774-d834-e040-11ac0c483268 | 12 | 91500576  | 91505463  | 6  | 4887  | 1  | 4  | 1  | NA | NA | NA |
| Breast-AdenoCa | fc8130e0-a774-d834-e040-11ac0c483268 | 12 | 130111239 | 130116671 | 7  | 5432  | NA | 2  | 5  | NA | NA | NA |
| Breast-AdenoCa | fc8130e0-a774-d834-e040-11ac0c483268 | 19 | 14097476  | 14100953  | 6  | 3477  | NA | 4  | 2  | NA | NA | NA |
| Breast-AdenoCa | fc8130e0-a774-d834-e040-11ac0c483268 | 20 | 1650616   | 1655962   | 14 | 5346  | 4  | 3  | 6  | NA | 1  | NA |
| Breast-AdenoCa | fc8130e0-a774-d834-e040-11ac0c483268 | 20 | 1860917   | 1862402   | 14 | 1485  | NA | 3  | 10 | 1  | NA | NA |
| Breast-AdenoCa | fc8130e0-a774-d834-e040-11ac0c483268 | X  | 135167072 | 135169163 | 7  | 2091  | NA | NA | NA | 2  | 4  | 1  |
| Breast-AdenoCa | fc8130e0-a8b4-d80d-e040-11ac0c483272 | 5  | 133800291 | 133806092 | 7  | 5801  | NA | NA | 7  | NA | NA | NA |
| Breast-AdenoCa | fc8130e0-a8b4-d80d-e040-11ac0c483272 | 10 | 111155735 | 111157014 | 6  | 1279  | NA | 3  | 3  | NA | NA | NA |
| Breast-AdenoCa | fc8130e0-a8b4-d80d-e040-11ac0c483272 | 12 | 113096233 | 113102167 | 7  | 5934  | 1  | 3  | 3  | NA | NA | NA |
| Breast-AdenoCa | fc8130e3-01ba-c740-e040-11ac0c483291 | 3  | 1012517   | 1018799   | 8  | 6282  | 1  | 4  | 2  | 1  | NA | NA |
| Breast-AdenoCa | fc8130e3-01ba-c740-e040-11ac0c483291 | 4  | 12237926  | 12244702  | 17 | 6776  | 2  | 10 | 4  | 1  | NA | NA |
| Breast-AdenoCa | fc8130e3-01ba-c740-e040-11ac0c483291 | 4  | 38023322  | 38027293  | 8  | 3971  | 1  | 2  | 2  | NA | 1  | 2  |
| Breast-AdenoCa | fc8130e3-01ba-c740-e040-11ac0c483291 | 5  | 172138916 | 172139192 | 8  | 276   | NA | NA | 8  | NA | NA | NA |
| Breast-AdenoCa | fc8130e3-01ba-c740-e040-11ac0c483291 | 12 | 46156581  | 46156753  | 6  | 172   | NA | 1  | 5  | NA | NA | NA |
| Breast-AdenoCa | fc8130e3-01ba-c740-e040-11ac0c483291 | 21 | 32481734  | 32483793  | 7  | 2059  | 3  | NA | 2  | 2  | NA | NA |
| Breast-AdenoCa | fc8130e3-023d-c7d4-e040-11ac0c483295 | 3  | 5316304   | 5317222   | 7  | 918   | 1  | 5  | 1  | NA | NA | NA |
| Breast-AdenoCa | fc8130e3-023d-c7d4-e040-11ac0c483295 | 7  | 7736506   | 7737356   | 7  | 850   | NA | 5  | 2  | NA | NA | NA |
| Breast-AdenoCa | fc8130e3-023d-c7d4-e040-11ac0c483295 | 8  | 42788457  | 42793471  | 15 | 5014  | NA | 5  | 10 | NA | NA | NA |
| Breast-AdenoCa | fc8130e3-023d-c7d4-e040-11ac0c483295 | 12 | 90323961  | 90325342  | 9  | 1381  | NA | 5  | 4  | NA | NA | NA |
| Breast-AdenoCa | fc8130e3-023d-c7d4-e040-11ac0c483295 | 14 | 26771886  | 26777788  | 15 | 5902  | NA | 12 | 3  | NA | NA | NA |
| Breast-AdenoCa | fc8130e3-023d-c7d4-e040-11ac0c483295 | 19 | 4823237   | 4824044   | 10 | 807   | NA | 1  | 9  | NA | NA | NA |
| Breast-AdenoCa | fc8130e3-023d-c7d4-e040-11ac0c483295 | 19 | 5281959   | 5286631   | 10 | 4672  | 1  | NA | 9  | NA | NA | NA |
| Breast-AdenoCa | fc8130e3-023d-c7d4-e040-11ac0c483295 | 20 | 7117296   | 7123746   | 19 | 6450  | 8  | 6  | 5  | NA | NA | NA |
| Breast-AdenoCa | fc8130e5-18b8-ef38-e040-11ac0c483297 | 7  | 88813118  | 88814496  | 6  | 1378  | NA | NA | NA | 2  | 4  | NA |
| Breast-AdenoCa | fc8130e5-18b8-ef38-e040-11ac0c483297 | 11 | 57622375  | 57629724  | 23 | 7349  | NA | 19 | 4  | NA | NA | NA |
| Breast-AdenoCa | fc8130e5-18b8-ef38-e040-11ac0c483297 | 11 | 69215697  | 69220431  | 8  | 4734  | NA | 2  | 6  | NA | NA | NA |
| Breast-AdenoCa | fc8130e5-18b8-ef38-e040-11ac0c483297 | 11 | 69581195  | 69583039  | 9  | 1844  | 2  | 5  | 2  | NA | NA | NA |
| Breast-AdenoCa | fc8130e5-18b8-ef38-e040-11ac0c483297 | 11 | 81292524  | 81294490  | 8  | 1966  | NA | 2  | 6  | NA | NA | NA |
| Breast-AdenoCa | fc8130e5-18b8-ef38-e040-11ac0c483297 | 11 | 81344169  | 81344485  | 8  | 316   | 1  | 6  | 1  | NA | NA | NA |
| Breast-AdenoCa | fc813235-5ed8-7695-e040-11ac0d485e3e | 3  | 173268705 | 173270215 | 6  | 1510  | 1  | 4  | 1  | NA | NA | NA |
| Breast-AdenoCa | fc93b9ab-760a-5223-e040-11ac0c482177 | 8  | 37271380  | 37274198  | 8  | 2818  | 1  | 5  | 2  | NA | NA | NA |
| Breast-AdenoCa | fc93b9ab-760a-5223-e040-11ac0c482177 | 9  | 77787640  | 77792666  | 7  | 5026  | NA | 5  | 2  | NA | NA | NA |
| Breast-AdenoCa | fc93b9ab-760a-5223-e040-11ac0c482177 | 12 | 6468447   | 6469981   | 9  | 1534  | 1  | 3  | 5  | NA | NA | NA |
| Bone-Epith     | fc95d5ce-6899-62f1-e040-11ac0c486011 | 7  | 63388908  | 63390927  | 11 | 2019  | NA | 1  | 10 | NA | NA | NA |
| Bone-Epith     | fc95d5ce-6899-62f1-e040-11ac0c486011 | 7  | 133584730 | 133586843 | 10 | 2113  | 1  | 1  | 8  | NA | NA | NA |
| Bone-Epith     | fc968a86-32e3-ee88-e040-11ac0d487adb | 21 | 21923094  | 21924180  | 6  | 1086  | NA | 3  | 3  | NA | NA | NA |
| Prost-AdenoCA  | fc9d5fc6-719b-0525-e040-11ac0d485f83 | 2  | 28805497  | 28806876  | 7  | 1379  | NA | 3  | 4  | NA | NA | NA |

|                 |                                      |    |           |           |    |      |    |    |    |    |    |    |
|-----------------|--------------------------------------|----|-----------|-----------|----|------|----|----|----|----|----|----|
| Prost-AdenoCA   | fc9d93b6-92e8-acb7-e040-11ac0d487dee | 8  | 37613267  | 37614329  | 11 | 1062 | 2  | 6  | 3  | NA | NA | NA |
| Breast-AdenoCa  | fc9f6916-da31-ab17-e040-11ac0c4808f3 | 20 | 18298530  | 18300351  | 7  | 1821 | NA | 3  | 4  | NA | NA | NA |
| Breast-AdenoCa  | fc9f6cb0-ceb9-790d-e040-11ac0c480ad1 | 1  | 64708154  | 64708476  | 6  | 322  | NA | 3  | 3  | NA | NA | NA |
| Breast-AdenoCa  | fc9f6cb0-ceb9-790d-e040-11ac0c480ad1 | 3  | 84136412  | 84141965  | 12 | 5553 | 3  | 5  | 4  | NA | NA | NA |
| Breast-AdenoCa  | fc9f6cb0-ceb9-790d-e040-11ac0c480ad1 | 3  | 154330676 | 154331893 | 10 | 1217 | NA | 7  | 3  | NA | NA | NA |
| Breast-AdenoCa  | fc9f6cb0-ceb9-790d-e040-11ac0c480ad1 | 4  | 160039714 | 160042097 | 6  | 2383 | 1  | 1  | 2  | NA | NA | 2  |
| CNS-GBM         | fca08ee9-b480-4dc7-be56-f1eb03b56f7c | 1  | 56006253  | 56006889  | 8  | 636  | 1  | 2  | 5  | NA | NA | NA |
| Breast-AdenoCa  | fca3f7d0-2231-661c-e040-11ac0c4832fd | 5  | 52558823  | 52562841  | 13 | 4018 | 5  | 4  | 4  | NA | NA | NA |
| Breast-AdenoCa  | fca3f7d0-2231-661c-e040-11ac0c4832fd | 8  | 38682914  | 38686819  | 12 | 3905 | NA | 5  | 7  | NA | NA | NA |
| Breast-AdenoCa  | fca3f7d0-2231-661c-e040-11ac0c4832fd | 10 | 71449123  | 71453108  | 13 | 3985 | 2  | 10 | 1  | NA | NA | NA |
| Breast-AdenoCa  | fca3f7d0-2231-661c-e040-11ac0c4832fd | 11 | 125735010 | 125736103 | 11 | 1093 | 5  | 3  | 3  | NA | NA | NA |
| Breast-AdenoCa  | fca3f7d0-2231-661c-e040-11ac0c4832fd | 12 | 2063016   | 2068136   | 13 | 5120 | 6  | 4  | 3  | NA | NA | NA |
| Breast-AdenoCa  | fca3f7d0-2231-661c-e040-11ac0c4832fd | 19 | 4192972   | 4196685   | 9  | 3713 | 2  | 6  | 1  | NA | NA | NA |
| Breast-AdenoCa  | fca3f7d0-2231-661c-e040-11ac0c4832fd | 22 | 46267490  | 46267697  | 7  | 207  | 2  | 5  | NA | NA | NA | NA |
| Uterus-AdenoCA  | fd504153-3cf6-44b9-99d5-21961ebac188 | 1  | 174104674 | 174109066 | 7  | 4392 | 2  | 1  | 4  | NA | NA | NA |
| Uterus-AdenoCA  | fd504153-3cf6-44b9-99d5-21961ebac188 | 4  | 84266017  | 84271407  | 7  | 5390 | 2  | NA | 5  | NA | NA | NA |
| Uterus-AdenoCA  | fd504153-3cf6-44b9-99d5-21961ebac188 | 5  | 162729300 | 162734208 | 26 | 4908 | 4  | 6  | 16 | NA | NA | NA |
| Uterus-AdenoCA  | fd504153-3cf6-44b9-99d5-21961ebac188 | 19 | 24403992  | 24406173  | 16 | 2181 | 2  | 6  | 8  | NA | NA | NA |
| Panc-AdenoCA    | fdbd0277-ddbf-4cc5-8ec3-3644b9553627 | 1  | 20353157  | 20363139  | 19 | 9982 | 3  | 12 | 2  | NA | 1  | 1  |
| Panc-AdenoCA    | fdbd0277-ddbf-4cc5-8ec3-3644b9553627 | 9  | 33195011  | 33195424  | 7  | 413  | 1  | 4  | 2  | NA | NA | NA |
| Panc-AdenoCA    | fdbd0277-ddbf-4cc5-8ec3-3644b9553627 | 9  | 104231808 | 104232131 | 10 | 323  | 1  | 2  | 7  | NA | NA | NA |
| Panc-AdenoCA    | fdbd0277-ddbf-4cc5-8ec3-3644b9553627 | 12 | 46944061  | 46946260  | 6  | 2199 | NA | NA | 6  | NA | NA | NA |
| Liver-HCC       | fdf9a814-c622-11e3-bf01-24c6515278c0 | 5  | 122296465 | 122297441 | 6  | 976  | NA | 1  | 5  | NA | NA | NA |
| Liver-HCC       | fdf9a814-c622-11e3-bf01-24c6515278c0 | 8  | 41284415  | 41285343  | 10 | 928  | NA | 6  | 4  | NA | NA | NA |
| Liver-HCC       | fdf9a814-c622-11e3-bf01-24c6515278c0 | 8  | 52632383  | 52640129  | 12 | 7746 | NA | 6  | 6  | NA | NA | NA |
| Breast-AdenoCa  | fe04d042-a4cc-4a14-8197-415ea40951aa | 1  | 235116160 | 235121431 | 8  | 5271 | NA | 3  | 5  | NA | NA | NA |
| Breast-AdenoCa  | fe04d042-a4cc-4a14-8197-415ea40951aa | 2  | 51183852  | 51188380  | 6  | 4528 | NA | 4  | 2  | NA | NA | NA |
| Breast-AdenoCa  | fe04d042-a4cc-4a14-8197-415ea40951aa | 2  | 51199473  | 51205339  | 7  | 5866 | NA | 1  | 6  | NA | NA | NA |
| Breast-AdenoCa  | fe04d042-a4cc-4a14-8197-415ea40951aa | 6  | 54953383  | 54954937  | 6  | 1554 | 4  | 1  | 1  | NA | NA | NA |
| Breast-AdenoCa  | fe04d042-a4cc-4a14-8197-415ea40951aa | 6  | 58641202  | 58642189  | 14 | 987  | 4  | 4  | 6  | NA | NA | NA |
| Breast-AdenoCa  | fe04d042-a4cc-4a14-8197-415ea40951aa | 9  | 109614201 | 109614677 | 6  | 476  | NA | 3  | 3  | NA | NA | NA |
| Breast-AdenoCa  | fe04d042-a4cc-4a14-8197-415ea40951aa | 10 | 551379    | 560308    | 11 | 8929 | 3  | 2  | 5  | NA | NA | 1  |
| Breast-AdenoCa  | fe04d042-a4cc-4a14-8197-415ea40951aa | 10 | 570059    | 576728    | 8  | 6669 | 2  | 1  | 5  | NA | NA | NA |
| Breast-AdenoCa  | fe04d042-a4cc-4a14-8197-415ea40951aa | 10 | 89977177  | 89984246  | 10 | 7069 | 1  | 1  | 8  | NA | NA | NA |
| Breast-AdenoCa  | fe04d042-a4cc-4a14-8197-415ea40951aa | 11 | 68576266  | 68579250  | 6  | 2984 | 2  | NA | 3  | NA | 1  | NA |
| Breast-AdenoCa  | fe04d042-a4cc-4a14-8197-415ea40951aa | 18 | 57092992  | 57099591  | 10 | 6599 | NA | 2  | 7  | NA | NA | 1  |
| Breast-AdenoCa  | fe04d042-a4cc-4a14-8197-415ea40951aa | 20 | 47072247  | 47078479  | 8  | 6232 | 1  | 2  | 5  | NA | NA | NA |
| Breast-AdenoCa  | fe04d042-a4cc-4a14-8197-415ea40951aa | 20 | 56564083  | 56570641  | 8  | 6558 | 2  | NA | 6  | NA | NA | NA |
| Skin-Melanoma   | fe8c62a6-c113-46e8-ab91-fdb90bb6a59f | 1  | 153441564 | 153442877 | 7  | 1313 | NA | 5  | 1  | NA | NA | 1  |
| Skin-Melanoma   | fe8c62a6-c113-46e8-ab91-fdb90bb6a59f | 3  | 147136222 | 147136648 | 7  | 426  | 1  | 3  | 3  | NA | NA | NA |
| Skin-Melanoma   | fe8c62a6-c113-46e8-ab91-fdb90bb6a59f | 16 | 28068318  | 28072327  | 6  | 4009 | NA | 3  | 3  | NA | NA | NA |
| Panc-AdenoCA    | fe96d91c-3686-4125-af71-b8703a011ad4 | 1  | 4092165   | 4092330   | 7  | 165  | 2  | 2  | 3  | NA | NA | NA |
| Panc-AdenoCA    | fe96d91c-3686-4125-af71-b8703a011ad4 | 8  | 89989262  | 89990334  | 11 | 1072 | NA | NA | 11 | NA | NA | NA |
| Panc-AdenoCA    | fe96d91c-3686-4125-af71-b8703a011ad4 | 8  | 112771653 | 112772667 | 16 | 1014 | NA | NA | 16 | NA | NA | NA |
| Panc-AdenoCA    | fe96d91c-3686-4125-af71-b8703a011ad4 | 8  | 121722841 | 121726306 | 13 | 3465 | NA | NA | 12 | 1  | NA | NA |
| Panc-AdenoCA    | fe96d91c-3686-4125-af71-b8703a011ad4 | 8  | 121941653 | 121943117 | 11 | 1464 | 1  | 2  | 8  | NA | NA | NA |
| Panc-AdenoCA    | fe96d91c-3686-4125-af71-b8703a011ad4 | 8  | 132118440 | 132118850 | 7  | 410  | 1  | 3  | 3  | NA | NA | NA |
| Panc-AdenoCA    | fe96d91c-3686-4125-af71-b8703a011ad4 | 11 | 19913571  | 19920391  | 23 | 6820 | 4  | 10 | 9  | NA | NA | NA |
| Panc-AdenoCA    | fe96d91c-3686-4125-af71-b8703a011ad4 | 12 | 33233777  | 33236806  | 16 | 3029 | 1  | 11 | 4  | NA | NA | NA |
| Panc-AdenoCA    | fe96d91c-3686-4125-af71-b8703a011ad4 | 15 | 21945396  | 21947854  | 13 | 2458 | 1  | 6  | 6  | NA | NA | NA |
| Panc-AdenoCA    | fe96d91c-3686-4125-af71-b8703a011ad4 | 17 | 70113254  | 70113487  | 6  | 233  | NA | 1  | 5  | NA | NA | NA |
| Panc-AdenoCA    | fe96d91c-3686-4125-af71-b8703a011ad4 | 20 | 13305899  | 13311758  | 16 | 5859 | 9  | 2  | 5  | NA | NA | NA |
| Panc-AdenoCA    | fe96d91c-3686-4125-af71-b8703a011ad4 | 20 | 30047387  | 30047755  | 8  | 368  | 2  | 1  | 5  | NA | NA | NA |
| Panc-AdenoCA    | fe96d91c-3686-4125-af71-b8703a011ad4 | 20 | 30771811  | 30772617  | 15 | 806  | 2  | 6  | 7  | NA | NA | NA |
| Ovary-AdenoCA   | fea5827b-251d-474b-8713-fc76db995fe7 | 6  | 130313439 | 130314543 | 8  | 1104 | 1  | 6  | 1  | NA | NA | NA |
| Ovary-AdenoCA   | fea5827b-251d-474b-8713-fc76db995fe7 | 7  | 147523754 | 147524196 | 7  | 442  | 1  | 4  | 2  | NA | NA | NA |
| Ovary-AdenoCA   | fea5827b-251d-474b-8713-fc76db995fe7 | 7  | 147838779 | 147842809 | 9  | 4030 | 1  | 5  | 3  | NA | NA | NA |
| Stomach-AdenoCA | feccee20-a62d-4152-b832-b9fdaca87a61 | 2  | 71200736  | 71203106  | 6  | 2370 | 1  | 2  | 3  | NA | NA | NA |
| Stomach-AdenoCA | feccee20-a62d-4152-b832-b9fdaca87a61 | 3  | 75246776  | 75248947  | 8  | 2171 | 1  | NA | 7  | NA | NA | NA |
| Stomach-AdenoCA | feccee20-a62d-4152-b832-b9fdaca87a61 | 12 | 26789760  | 26790174  | 12 | 414  | NA | NA | 12 | NA | NA | NA |



|                 |                                      |    |           |           |    |       |    |    |    |    |    |    |
|-----------------|--------------------------------------|----|-----------|-----------|----|-------|----|----|----|----|----|----|
| Stomach-AdenoCA | feccee20-a62d-4152-b832-b9fdaca87a61 | 12 | 68976007  | 68979623  | 10 | 3616  | 2  | 3  | 4  | 1  | NA | NA |
| Stomach-AdenoCA | feccee20-a62d-4152-b832-b9fdaca87a61 | 12 | 69648501  | 69649876  | 12 | 1375  | 5  | 4  | 3  | NA | NA | NA |
| Stomach-AdenoCA | feccee20-a62d-4152-b832-b9fdaca87a61 | 12 | 69757102  | 69757283  | 9  | 181   | NA | NA | 9  | NA | NA | NA |
| Stomach-AdenoCA | feccee20-a62d-4152-b832-b9fdaca87a61 | 20 | 51871800  | 51873000  | 18 | 1200  | NA | NA | 18 | NA | NA | NA |
| Ovary-AdenoCA   | ff3fe4a3-7d19-4d4d-81b6-aaa41ba5bf39 | 8  | 14165050  | 14169233  | 10 | 4183  | 2  | 1  | 7  | NA | NA | NA |
| Ovary-AdenoCA   | ff3fe4a3-7d19-4d4d-81b6-aaa41ba5bf39 | 8  | 19435904  | 19444917  | 30 | 9013  | 8  | 14 | 8  | NA | NA | NA |
| Ovary-AdenoCA   | ff3fe4a3-7d19-4d4d-81b6-aaa41ba5bf39 | 8  | 20027156  | 20032388  | 13 | 5232  | 4  | 5  | 4  | NA | NA | NA |
| Ovary-AdenoCA   | ff3fe4a3-7d19-4d4d-81b6-aaa41ba5bf39 | 8  | 25012598  | 25018458  | 7  | 5860  | 2  | 3  | 2  | NA | NA | NA |
| Ovary-AdenoCA   | ff3fe4a3-7d19-4d4d-81b6-aaa41ba5bf39 | 8  | 25371949  | 25383596  | 14 | 11647 | 4  | 4  | 6  | NA | NA | NA |
| Ovary-AdenoCA   | ff3fe4a3-7d19-4d4d-81b6-aaa41ba5bf39 | 8  | 25793300  | 25799632  | 14 | 6332  | 4  | 2  | 8  | NA | NA | NA |
| Ovary-AdenoCA   | ff3fe4a3-7d19-4d4d-81b6-aaa41ba5bf39 | 8  | 29417069  | 29427154  | 21 | 10085 | 5  | 3  | 13 | NA | NA | NA |
| Ovary-AdenoCA   | ff3fe4a3-7d19-4d4d-81b6-aaa41ba5bf39 | 8  | 31955166  | 31961912  | 10 | 6746  | 5  | 2  | 3  | NA | NA | NA |
| Ovary-AdenoCA   | ff3fe4a3-7d19-4d4d-81b6-aaa41ba5bf39 | 8  | 36483258  | 36493012  | 15 | 9754  | 2  | 5  | 8  | NA | NA | NA |
| Ovary-AdenoCA   | ff3fe4a3-7d19-4d4d-81b6-aaa41ba5bf39 | 8  | 36498513  | 36501039  | 20 | 2526  | 5  | 7  | 7  | NA | 1  | NA |
| Ovary-AdenoCA   | ff3fe4a3-7d19-4d4d-81b6-aaa41ba5bf39 | 8  | 43155449  | 43162516  | 10 | 7067  | 1  | 6  | 3  | NA | NA | NA |
| Ovary-AdenoCA   | ff3fe4a3-7d19-4d4d-81b6-aaa41ba5bf39 | 8  | 53033690  | 53041646  | 18 | 7956  | 3  | 7  | 8  | NA | NA | NA |
| Ovary-AdenoCA   | ff3fe4a3-7d19-4d4d-81b6-aaa41ba5bf39 | 8  | 56518490  | 56523775  | 10 | 5285  | 1  | 1  | 8  | NA | NA | NA |
| Ovary-AdenoCA   | ff3fe4a3-7d19-4d4d-81b6-aaa41ba5bf39 | 8  | 93953723  | 93958238  | 19 | 4515  | 3  | 7  | 9  | NA | NA | NA |
| Ovary-AdenoCA   | ff3fe4a3-7d19-4d4d-81b6-aaa41ba5bf39 | 8  | 93983818  | 93991124  | 9  | 7306  | 2  | 2  | 5  | NA | NA | NA |
| Ovary-AdenoCA   | ff3fe4a3-7d19-4d4d-81b6-aaa41ba5bf39 | 8  | 95323780  | 95329242  | 9  | 5462  | NA | 2  | 6  | NA | 1  | NA |
| Ovary-AdenoCA   | ff3fe4a3-7d19-4d4d-81b6-aaa41ba5bf39 | 8  | 95362968  | 95367229  | 19 | 4261  | 6  | 2  | 11 | NA | NA | NA |
| Ovary-AdenoCA   | ff3fe4a3-7d19-4d4d-81b6-aaa41ba5bf39 | 8  | 98982787  | 98987993  | 14 | 5206  | 2  | 4  | 8  | NA | NA | NA |
| Ovary-AdenoCA   | ff3fe4a3-7d19-4d4d-81b6-aaa41ba5bf39 | 8  | 102555780 | 102561163 | 9  | 5383  | 5  | 1  | 3  | NA | NA | NA |
| Ovary-AdenoCA   | ff3fe4a3-7d19-4d4d-81b6-aaa41ba5bf39 | 8  | 104551699 | 104555592 | 17 | 3893  | 4  | 2  | 10 | NA | NA | 1  |
| Ovary-AdenoCA   | ff3fe4a3-7d19-4d4d-81b6-aaa41ba5bf39 | 8  | 117279426 | 117292026 | 17 | 12600 | 3  | 2  | 12 | NA | NA | NA |
| Ovary-AdenoCA   | ff3fe4a3-7d19-4d4d-81b6-aaa41ba5bf39 | 8  | 119816451 | 119828550 | 27 | 12099 | 6  | 10 | 11 | NA | NA | NA |
| Ovary-AdenoCA   | ff3fe4a3-7d19-4d4d-81b6-aaa41ba5bf39 | 8  | 121448823 | 121455748 | 10 | 6925  | 1  | 1  | 8  | NA | NA | NA |
| Ovary-AdenoCA   | ff3fe4a3-7d19-4d4d-81b6-aaa41ba5bf39 | 8  | 122347112 | 122352956 | 18 | 5844  | 7  | 6  | 4  | NA | NA | 1  |
| Ovary-AdenoCA   | ff3fe4a3-7d19-4d4d-81b6-aaa41ba5bf39 | 8  | 122452503 | 122460636 | 10 | 8133  | 3  | 4  | 3  | NA | NA | NA |
| Ovary-AdenoCA   | ff3fe4a3-7d19-4d4d-81b6-aaa41ba5bf39 | 8  | 126924261 | 126929227 | 7  | 4966  | 1  | 1  | 5  | NA | NA | NA |
| Ovary-AdenoCA   | ff3fe4a3-7d19-4d4d-81b6-aaa41ba5bf39 | 8  | 132760658 | 132767991 | 21 | 7333  | 3  | 5  | 13 | NA | NA | NA |
| Ovary-AdenoCA   | ff3fe4a3-7d19-4d4d-81b6-aaa41ba5bf39 | 8  | 135376528 | 135383229 | 8  | 6701  | 2  | 4  | 1  | NA | 1  | NA |
| Ovary-AdenoCA   | ff3fe4a3-7d19-4d4d-81b6-aaa41ba5bf39 | 8  | 135385038 | 135388975 | 8  | 3937  | 1  | 3  | 3  | NA | NA | 1  |
| Ovary-AdenoCA   | ff3fe4a3-7d19-4d4d-81b6-aaa41ba5bf39 | 8  | 138070330 | 138076596 | 11 | 6266  | 2  | 1  | 8  | NA | NA | NA |
| Lymph-CLL       | ffa976f0-aa60-4867-842e-361afa7d68ac | 14 | 106325068 | 106330808 | 57 | 5740  | 2  | 16 | 15 | 12 | 5  | 7  |
| Bladder-TCC     | ffd44feb-ac3-4104-b1e8-954d705a6450  | 1  | 26710669  | 26711920  | 6  | 1251  | 1  | 3  | 2  | NA | NA | NA |
| Bladder-TCC     | ffd44feb-ac3-4104-b1e8-954d705a6450  | 3  | 12431057  | 12431321  | 6  | 264   | 1  | 2  | 3  | NA | NA | NA |
| Bladder-TCC     | ffd44feb-ac3-4104-b1e8-954d705a6450  | 4  | 32713222  | 32715381  | 6  | 2159  | NA | NA | 5  | NA | NA | 1  |
| Bladder-TCC     | ffd44feb-ac3-4104-b1e8-954d705a6450  | 8  | 41962659  | 41963636  | 7  | 977   | NA | 4  | 2  | NA | 1  | NA |
| Bladder-TCC     | ffd44feb-ac3-4104-b1e8-954d705a6450  | 8  | 104570483 | 104575829 | 9  | 5346  | NA | 1  | 8  | NA | NA | NA |
| Bladder-TCC     | ffd44feb-ac3-4104-b1e8-954d705a6450  | 10 | 38412093  | 38415277  | 9  | 3184  | NA | 4  | 5  | NA | NA | NA |
| Bladder-TCC     | ffd44feb-ac3-4104-b1e8-954d705a6450  | 11 | 73189432  | 73193900  | 6  | 4468  | NA | 1  | 5  | NA | NA | NA |
| Bladder-TCC     | ffd44feb-ac3-4104-b1e8-954d705a6450  | 14 | 75188073  | 75191880  | 7  | 3807  | NA | 2  | 5  | NA | NA | NA |
| Bladder-TCC     | ffd44feb-ac3-4104-b1e8-954d705a6450  | 15 | 51054514  | 51057482  | 7  | 2968  | NA | 3  | 4  | NA | NA | NA |
| Bladder-TCC     | ffd44feb-ac3-4104-b1e8-954d705a6450  | 19 | 5851064   | 5854905   | 6  | 3841  | 1  | 1  | 4  | NA | NA | NA |
| Bladder-TCC     | ffd44feb-ac3-4104-b1e8-954d705a6450  | 19 | 19813411  | 19814274  | 7  | 863   | 2  | 1  | 4  | NA | NA | NA |
| Bladder-TCC     | ffd44feb-ac3-4104-b1e8-954d705a6450  | X  | 154767982 | 154772343 | 11 | 4361  | 2  | 3  | 5  | NA | NA | 1  |
| Panc-AdenoCA    | ffe4bb51-e98a-41a7-a4e1-c3970386889c | 1  | 8623066   | 8623410   | 9  | 344   | NA | NA | 9  | NA | NA | NA |
| Panc-AdenoCA    | ffe4bb51-e98a-41a7-a4e1-c3970386889c | 3  | 48427702  | 48433515  | 9  | 5813  | NA | NA | 7  | NA | NA | 2  |
| Panc-AdenoCA    | ffe4bb51-e98a-41a7-a4e1-c3970386889c | 17 | 19753120  | 19755654  | 35 | 2534  | 1  | 11 | 22 | NA | NA | 1  |
| Panc-AdenoCA    | ffe4bb51-e98a-41a7-a4e1-c3970386889c | 17 | 26586310  | 26591331  | 16 | 5021  | 3  | 3  | 10 | NA | NA | NA |
